# Supplementary material for: Forging structural complexity: diastereoselective synthesis of densely substituted β-lactams with dual functional handles for enhanced core modifications
Source: Royal Society of Chemistry journal article supplement (doi:10.1039/d4sc01513d), 2024-01-01

## Supporting Information

### Forging Structural Complexity: Diastereoselective Synthesis of Densely Substituted $\beta$ -Lactams with Dual Functional Handles for Enhanced Core Modifications

Agustin M. Rodriguez Treviño,<sup>[a]</sup> Pierre Loch-Temzelides,<sup>†[a]</sup> Sanjay Pandiri,<sup>†[a]</sup> Justin K. Kirkland,<sup>[b]</sup> Michael T. Davenport,<sup>[b]</sup> Ulises Aguinaga,<sup>[c]</sup> Muhammed Yousufuddin,<sup>[c]</sup> Daniel H. Ess,<sup>[b]</sup> László Kürti<sup>\*[a]</sup>

[a] Department of Chemistry, Rice University, Houston, Texas 77030, USA. E-mail: kurti.laszlo@rice.edu

[b] Department of Chemistry and Biochemistry, Brigham Young University, Provo, Utah 84604, USA.

[c] Department of Natural Sciences, University of North Texas at Dallas, Dallas, Texas 75241, USA.

## TABLE OF CONTENTS

|                                                                                                     |     |
|-----------------------------------------------------------------------------------------------------|-----|
| 1. General information.....                                                                         | 3   |
| 2. Preliminary experimental results: .....                                                          | 4   |
| 3. Optimization of the reaction conditions .....                                                    | 5   |
| 4. General procedures for the synthesis of $\alpha,\beta$ -unsaturated aldehydes.....               | 7   |
| 5. General procedures for the synthesis of carboxylic acids .....                                   | 7   |
| 6. General procedures for the synthesis of $\alpha,\beta$ -unsaturated esters .....                 | 8   |
| 7. General procedures for the synthesis of hydroxamate esters.....                                  | 8   |
| 8. General procedures for the synthesis of silyl imino ethers .....                                 | 9   |
| 9. General procedures for the synthesis of $\beta$ -lactams .....                                   | 9   |
| 10. Synthesis and characterization of $\beta$ -lactams (2) and indolenes (3):.....                  | 10  |
| 11. Synthesis and characterization of silyl imino ethers (1):.....                                  | 25  |
| 12. Synthesis and characterization of hydroxamate esters (12):.....                                 | 45  |
| 13. Synthesis and characterization carboxylic acids (13): .....                                     | 64  |
| 14. Synthesis and characterization of $\alpha,\beta$ -unsaturated esters (13): .....                | 70  |
| 15. Synthesis and characterization of $\alpha,\beta$ -unsaturated aldehydes (14):.....              | 75  |
| 16. Procedures and characterization of functionalized $\beta$ -lactams: .....                       | 78  |
| 17. Control experiments and procedures and characterization for the synthesis of compound 2a': .... | 84  |
| 18. X-ray data: .....                                                                               | 87  |
| 19. Computational studies:.....                                                                     | 107 |
| 20. Spectroscopic data: .....                                                                       | 135 |

## 1. General Information

All reactions were carried out in oven-dried glassware unless otherwise noted. When needed, nonaqueous reagents were transferred under argon *via* syringe or cannula and dried prior to use. Dry solvents were obtained by passing deoxygenated solvents through activated alumina columns (MBraun SPS-800 series Solvent Purification System). Other solvents and reagents were used as obtained from the supplier unless otherwise noted. 1,1,1,3,3,3-Hexafluoroisopropanol (>99.5%) was purchased from Oakwood Chemicals. Analytical TLC was performed using Merck silica gel F254 (230–400 mesh) plates and analyzed by UV light or by staining upon heating with KMnO<sub>4</sub> solution (1 g of KMnO<sub>4</sub>, 6.7 g of K<sub>2</sub>CO<sub>3</sub>, 1.7 mL of 1 M NaOH, 100 mL of H<sub>2</sub>O). Flash column chromatography was performed using Biotage Isolera One automated chromatograph with pre-packed KP-Sil cartridges using p.a. grade solvents unless otherwise noted. The <sup>1</sup>H and <sup>13</sup>C NMR spectra were recorded in CDCl<sub>3</sub> or DMSO-*d*<sub>6</sub> on a Bruker Avance DRX-600 spectrometer. The chemical shifts are reported in ppm relative to residual CHCl<sub>3</sub> (δ 7.26) or DMSO (2.50 ppm) for <sup>1</sup>H NMR and CDCl<sub>3</sub> (δ 77.16) DMSO-*d*<sub>6</sub> (39.52) for <sup>13</sup>C NMR. The diastereomeric ratios were determined by <sup>1</sup>H NMR analysis of crude reaction mixtures. Melting points (MP) were determined in open capillaries using a Mettler Toledo MP50 melting point system and are uncorrected. High-resolution mass spectrometric data were measured using Agilent 1290/6230 LCMS-TOF system with electrospray ionization (ESI) in negative/positive mode.

## 2. Preliminary experimental results:

*Naskar et al.*, 1999:

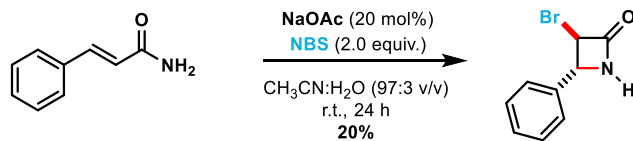

Our results:

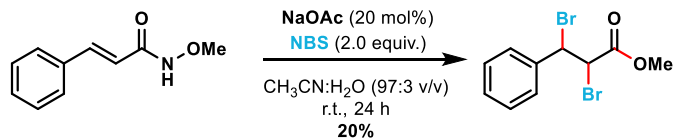

Proposed mechanism by *Zhato et al.* and *Chattopadhyay et al.*:

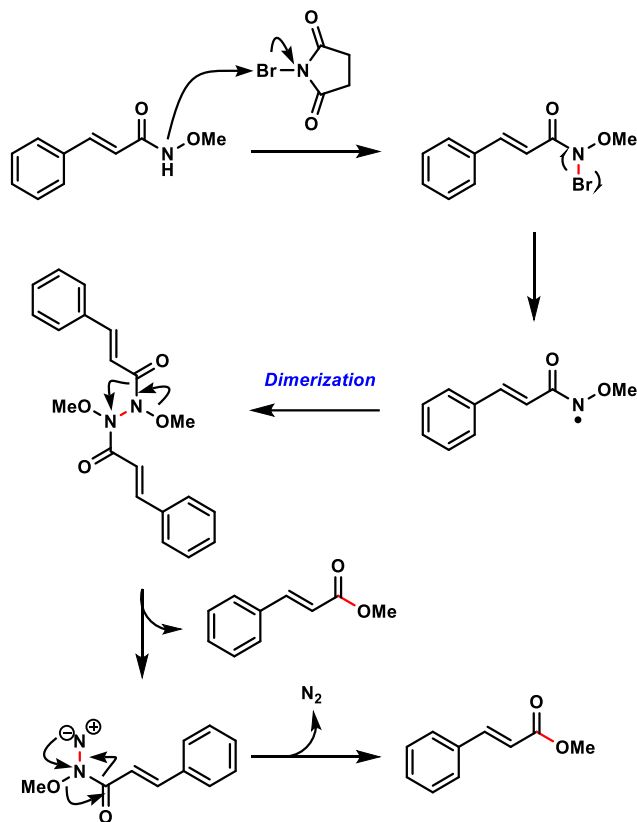



### 3. Optimization of the reaction conditions

To an oven-dried 8-mL vial equipped with a magnetic stir bar was added the silyl imino ether **1** (0.5 mmol). The starting material was suspended in the indicated solvent at concentration, followed by the addition of *N*-Bromo succinimide (indicated equivalents). The reaction mixture was then either kept at room temperature or heated to the given temperature for the given time. Finally, excess solvent was evaporated under vacuum and the crude mixture was purified by flash column chromatography to obtain the pure  $\beta$ -lactam **2**. The full optimization table is shown next:

**Table 1.** Optimization of the cyclization reaction to afford monocyclic *N*-alkoxy/aryloxy  $\beta$ -lactams.

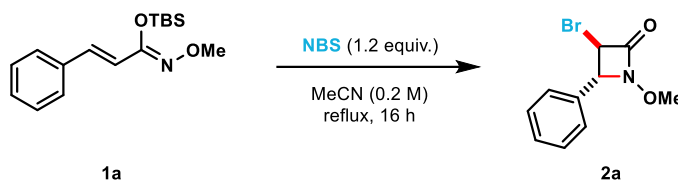

| entry <sup>a</sup> | Solvent                            | NBS equivalents | Concentration (M) | Temperature (°C) | Time (h) | Yield (%)      |
|--------------------|------------------------------------|-----------------|-------------------|------------------|----------|----------------|
| 1                  | CH <sub>3</sub> CN                 | 1.2             | 0.2               | r.t.             | 16       | 0 <sup>a</sup> |
| 2                  | CH <sub>3</sub> CN                 | 1.2             | 0.2               | Reflux (82)      | 16       | 30             |
| 3                  | Toluene                            | 1.2             | 0.2               | Reflux (110)     | 16       | 0 <sup>a</sup> |
| 4                  | Dioxane                            | 1.2             | 0.2               | Reflux (110)     | 16       | 0 <sup>b</sup> |
| 5                  | HFIP                               | 1.2             | 0.2               | r.t.             | 1        | 67             |
| 6                  | Isopropanol                        | 1.2             | 0.2               | r.t.             | 0.5      | 0 <sup>b</sup> |
| 7                  | THF                                | 1.2             | 0.2               | r.t.             | 3        | 0 <sup>a</sup> |
| 8                  | THF                                | 1.2             | 0.2               | 40               | 16       | 0 <sup>b</sup> |
| 9                  | CF <sub>3</sub> CH <sub>2</sub> OH | 1.2             | 0.2               | r.t.             | 16       | 31             |
| 10                 | DMF                                | 1.2             | 0.2               | r.t.             | 1        | 0 <sup>b</sup> |
| 11                 | DCM                                | 1.2             | 0.2               | Reflux (40)      | 16       | 0 <sup>a</sup> |
| 12                 | 2-Me-THF                           | 1.2             | 0.2               | r.t.             | 16       | 0 <sup>b</sup> |
| 13                 | Diethyl Ether                      | 1.2             | 0.2               | r.t.             | 16       | 0 <sup>a</sup> |
| 14                 | Ethanol                            | 1.2             | 0.2               | r.t.             | 4        | 0 <sup>b</sup> |
| 15                 | HFIP                               | 1.0             | 0.2               | r.t.             | 1        | 61             |
| 16                 | HFIP                               | 1.5             | 0.2               | r.t.             | 1        | 80             |
| 17                 | HFIP                               | 2.0             | 0.2               | r.t.             | 1        | 76             |
| 18                 | HFIP                               | 1.5             | 0.1               | r.t.             | 1        | 80             |
| 19                 | HFIP                               | 1.5             | 0.5               | r.t.             | 1        | 68             |
| 20                 | HFIP                               | 1.5             | 1.0               | r.t.             | 1        | 47             |
| 21                 | HFIP:MeCN                          | 1.5             | 0.2               | Reflux (40)      | 16       | 15             |
| 22                 | HFIP:Toluene                       | 1.5             | 0.2               | r.t.             | 1        | trace          |
| 23                 | HFIP:DCM                           | 1.5             | 0.2               | r.t.             | 1        | 70             |

<sup>a</sup>The silyl imino ether **1** remained unreacted and no desired product **2** was observed. <sup>b</sup>The silyl imino ether **1** was consumed and no desired product **2** was observed.

**Table 2.** Screening of different electrophiles for the cyclization reaction from optimized reaction conditions.

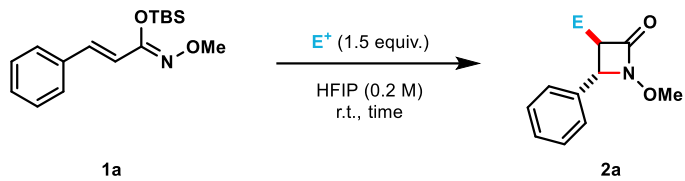

| entry <sup>a</sup> | Reagent         | Time (h) | Yield (%)      |
|--------------------|-----------------|----------|----------------|
| 1                  | NBS             | 1        | 80             |
| 2                  | DBI             | 1        | 78             |
| 3                  | Br <sub>2</sub> | 0.5      | 42             |
| 4                  | NCS             | 1        | 21             |
| 5                  | DCDMH           | 6        | 20             |
| 6                  | TCCA            | 6        | 31             |
| 7                  | I <sub>2</sub>  | 16       | 0 <sup>a</sup> |
| 8                  | NIS             | 6        | 39             |
| 9                  | Select Fluor    | 6        | 0 <sup>a</sup> |
| 10                 | mCPBA           | 3        | 0 <sup>a</sup> |

<sup>a</sup>The silyl imino ether **1** was consumed and no desired product **2** was observed.

#### 4. General procedures for the synthesis of $\alpha,\beta$ -unsaturated aldehydes

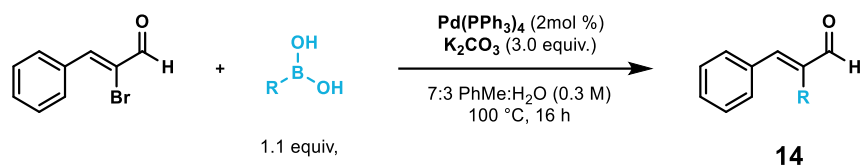

**Method A:** Following a modified literature procedure.<sup>1</sup> In a round-bottom flask under Argon atmosphere,  $\alpha$ -bromo cinnamaldehyde (1.0 equiv.), boronic acid (1.1 equiv.),  $\text{Pd(PPh}_3)_4$  (2 mol%) and  $\text{K}_2\text{CO}_3$  (3.0 equiv.) were dissolved in toluene- $\text{H}_2\text{O}$  (7:3, 0.3 M) mixture. The reaction mixture was heated to 100 °C overnight. After completion of the reaction, the reaction was diluted with EtOAc and partitioned with  $\text{H}_2\text{O}$ . It was extracted twice with EtOAc and the combined organic layers were dried over  $\text{Na}_2\text{SO}_4$ . The reaction mixture was then concentrated *in vacuo* and it was purified by column chromatography on silica gel (hexanes:EtOAc) to afford the corresponding  $\alpha,\beta$ -unsaturated aldehydes.

#### 5. General procedures for the synthesis of carboxylic acids

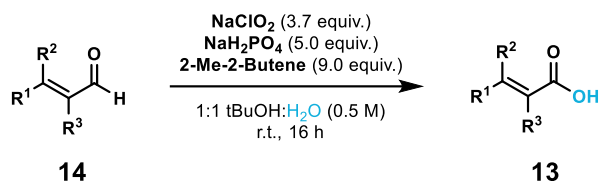

**Method A:** Following a modified literature procedure.<sup>2</sup> In a round-bottom flask open to air, the corresponding cinnamaldehyde (1.0 equiv.) was dissolved in *t*-BuOH (0.5 M) at room temperature. Then  $\text{NaClO}_2$  (3.7 equiv.) was added, followed by  $\text{H}_2\text{O}$  (0.5 M) and 2-methyl-2-butene (9.0 equiv.). Finally,  $\text{NaH}_2\text{PO}_4$  (5.0 equiv.) was added, and the reaction mixture was loosely capped. It was stirred vigorously at room temperature overnight. After full conversion, saturated  $\text{NH}_4\text{Cl}$  was added, and the reaction mixture was extracted with EtOAc three times. The combined organic layers partitioned with conc.  $\text{NaHCO}_3$  until the aqueous layer was basic. It was extracted three times with  $\text{NaHCO}_3$ . The combined aqueous layers were then carefully acidified with 3 M HCl, and it was extracted three times with DCM. The combined organic layers were then dried over  $\text{Na}_2\text{SO}_4$ . Evaporation of the solvent afforded the corresponding  $\alpha,\beta$ -unsaturated carboxylic acids without further purification.

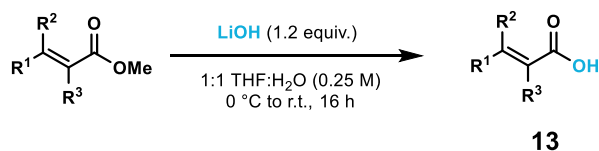

**Method B:** Following a modified literature procedure.<sup>3</sup> In a round-bottom flask open to air,  $\text{LiOH}$  (1.2 equiv.) was dissolved in THF: $\text{H}_2\text{O}$  (1:1, 0.25 M) at room temperature. The reaction mixture was then cooled down to 0 °C using an ice-water bath. Then the corresponding methyl ester (1.0 equiv.) was added slowly.

<sup>1</sup> Matsuda, T., Sakurai, Y. *Eur. J. Org. Chem.* **2013**, 2013, 4219–4222.

<sup>2</sup> Yang, C., Li, F., Wu, T.R., Cui, R., Wu, B.B., Jin, R.X., Li, Y., Wang, X.S. *Org. Lett.* **2021**, 23, 8132–8137.

<sup>3</sup> Niwayama, S. Cho, H., Lin, C. *Tetrahedron Lett.* **2008**, 49, 4434–4436.

After complete addition, the reaction mixture was allowed to warm to room temperature, and it was monitored by TLC. After full consumption of the starting material, the solvent was removed *in vacuo* and conc. NaHCO<sub>3</sub> was added to the reaction mixture. It was then partitioned in DCM, and it was extracted three times with DCM. The aqueous layer was then carefully acidified with 3 M HCl, and it was extracted three times with DCM. The combined organic layers were then dried over Na<sub>2</sub>SO<sub>4</sub>. Evaporation of the solvent afforded the corresponding carboxylic acids without further purification.

## 6. General procedures for the synthesis of $\alpha,\beta$ -unsaturated esters

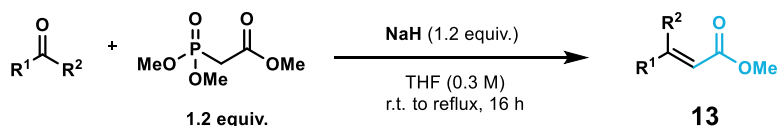

**Method A:** Following a modified literature procedure.<sup>4</sup> In a flame-dried round bottom flask under Argon atmosphere, sodium hydride (60% dispersion in mineral oil, 1.2 equiv.) was suspended in dry THF (0.3 M). Trimethyl phosphonoacetate (1.2 equiv.) was then added slowly at room temperature. After 5 min, the appropriate aldehyde or ketone (1.0 equiv.) was added to reaction mixture. The reaction mixture was then heated to reflux (66 °C) overnight. After completion, the reaction was allowed to cool down to room temperature; it was partitioned with H<sub>2</sub>O and extracted three times with EtOAc. The combined organic layers were dried over Na<sub>2</sub>SO<sub>4</sub> and concentrated *in vacuo*. The crude mixture was purified by column chromatography on silica gel (hexanes:EtOAc) to afford the corresponding  $\alpha,\beta$ -unsaturated methyl esters.

## 7. General procedures for the synthesis of hydroxamate esters

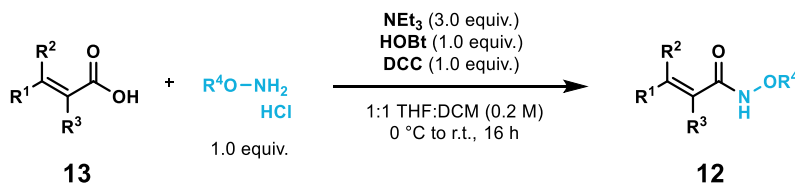

**Method A:** In an oven-dried round-bottom flask under Argon atmosphere, the hydroxylamine hydrochloride (1.0 equiv.) was suspended in THF:DCM (1:1, 0.2 M) at room temperature. The reaction mixture was cooled down to 0 °C using a water-ice bath. NEt<sub>3</sub> (1.5 equiv.) was added, and the reaction mixture was allowed to stir for 20 min at 0 °C. HOBt hydrate (1.0 equiv.) and the carboxylic acid (1.0 equiv.) were added subsequently, and the reaction was allowed to stir for an additional 30 min at 0 °C. Finally, NEt<sub>3</sub> (1.5 equiv.) were added, reaction was allowed to warm up to room temperature and it was allowed to stir overnight. The reaction was then filtered, and the obtained filtrate was washed once with HCl (3 M), followed by one wash with conc. NaHCO<sub>3</sub> and finally with H<sub>2</sub>O. The combined organic layers were dried over Na<sub>2</sub>SO<sub>4</sub> and concentrated *in vacuo*. The crude reaction mixture was purified by column chromatography on silica gel (hexanes:EtOAc) to afford the corresponding hydroxamate esters.

<sup>4</sup> Duan, Z.C., Hu, X.P., Zhang, C., Zheng, Z. *J. Org. Chem.* **2010**, 75, 8319–8321.

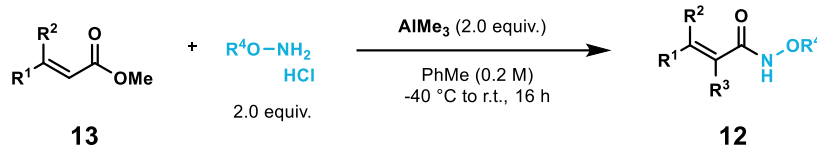

**Method B:** In a flame-dried round-bottom flask under Argon atmosphere, the hydroxylamine hydrochloride (2.0 equiv.) was suspended in dry Toluene (0.2 M). The reaction mixture was then cooled down to  $-40\text{ }^\circ\text{C}$  using an acetone cooling bath. Then a solution of  $\text{AlMe}_3$  (2M in toluene, 2.0 equiv.) was added dropwise avoiding a spike in temperature greater than  $20\text{ }^\circ\text{C}$ . After the addition was done, the corresponding ester (1.0 equiv.) was added, and the reaction was allowed to warm to room temperature, and it was allowed to stir overnight. The reaction was then quenched with HCl (3M) until gas evolution ceased. The reaction mixture was then partitioned with  $\text{H}_2\text{O}$  and extracted three times with EtOAc. The combined organic layers were dried over  $\text{Na}_2\text{SO}_4$  and concentrated *in vacuo*. The crude reaction mixture was purified by column chromatography on silica gel (hexanes:EtOAc) to afford the corresponding hydroxamate esters.

## 8. General procedures for the synthesis of silyl imino ethers

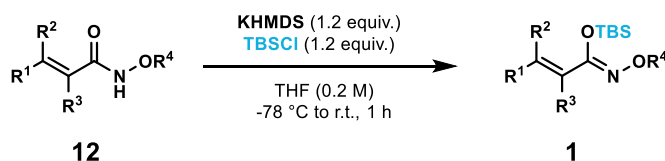

In a flame-dried round bottom flask under Argon atmosphere, the corresponding hydroxamate ester (1.0 equiv.) was dissolved in dry THF (0.2 M) at room temperature. The reaction mixture was then cooled down to  $-78\text{ }^\circ\text{C}$  using an acetone-dry ice bath. A solution of KHMDS (1.2 equiv., 1.0 M in THF) was then added slowly. TBSCl (1.2 equiv.) was then added, and the reaction was allowed to warm to room temperature. The reaction was left stirring for 30 to 60 min until full conversion was overserved by TLC. The reaction mixture was then partitioned with  $\text{H}_2\text{O}$  and extracted with EtOAc three times. The combined organic layers were dried over  $\text{Na}_2\text{SO}_4$  and concentrated *in vacuo*. The reaction crude was then purified by column chromatography on silica gel (hexanes:EtOAc) to afford the corresponding silyl imino ethers.

## 9. General procedures for the synthesis of $\beta$ -lactams

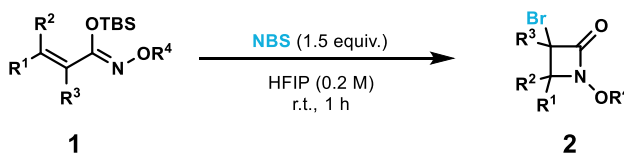

In an 8-mL scintillation vial open to air, the corresponding silyl imino ether (0.5 mmol) was dissolved in HFIP (0.2 M). NBS (1.5 equiv.) was then added, and the reaction mixture was stirred for 60 min. After completion, the reaction was concentrated *in vacuo* and purified by column chromatography on silica gel (hexanes:EtOAc) to afford the corresponding  $\beta$ -lactam.

## 10. Synthesis and characterization of lactams (2) and indolenes (3):

### Rac 3-bromo-1-methoxy-4-phenylazetidin-2-one (2a)

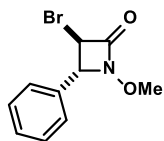

Following the general procedures for the synthesis of  $\beta$ -lactams, in an 8-mL scintillation vial open to air, compound **1a** (145.7 mg, 0.5 mmol) was dissolved in HFIP (2.5 mL, 0.2 M). NBS (134.9 mg, 1.5 equiv.) was then added, and the reaction mixture was stirred for 60 min. After completion, the reaction was concentrated *in vacuo* and purified by column chromatography on silica gel (90:10 Hexanes:EtOAc) to afford rac 3-bromo-1-methoxy-4-phenylazetidin-2-one **2a** as a colorless oil (102 mg, 80%).

$^1\text{H NMR}$  (600 MHz,  $\text{CDCl}_3$ )  $\delta$  7.46 – 7.42 (m, 3H), 7.40 – 7.38 (m, 2H), 4.93 (d,  $J = 1.7$  Hz, 1H), 4.33 (d,  $J = 1.7$  Hz, 1H), 3.80 (s, 3H).

$^{13}\text{C NMR}$  (150 MHz,  $\text{CDCl}_3$ )  $\delta$  160.4, 134.4, 129.9, 129.4, 126.7, 70.6, 64.1, 46.2.

HRMS: Calculated  $[\text{M}+\text{H}]^+$  for  $\text{C}_{10}\text{H}_{11}\text{BrNO}_2^+$ : 255.9968, found: 255.9959.

FTIR ( $\text{cm}^{-1}$ ): 3005, 2939, 2825, 1780, 1497, 1456, 1364, 1204, 11146, 1035, 975, 724, 696.

### rac 1-(benzyloxy)-3-bromo-4-phenylazetidin-2-one (2b)

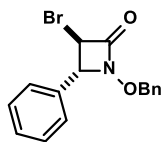

Following the general procedures for the synthesis of  $\beta$ -lactams, in an 8-mL scintillation vial open to air, compound **1b** (183.8 mg, 0.5 mmol) was dissolved in HFIP (2.5 mL, 0.2 M). NBS (134.9 mg, 1.5 equiv.) was then added, and the reaction mixture was stirred for 60 min. After completion, the reaction was concentrated *in vacuo* and purified by column chromatography on silica gel (90:10 Hexanes:EtOAc) to afford rac 1-(benzyloxy)-3-bromo-4-phenylazetidin-2-one **2b** as a colorless oil (132.9 mg, 80%).

$^1\text{H NMR}$  (600 MHz,  $\text{CDCl}_3$ )  $\delta$  7.40 – 7.32 (m, 8H), 7.22 – 7.19 (m, 2H), 5.03 (d,  $J = 11.3$ , 1H), 4.94 (d,  $J = 11.3$ , 1H), 4.42 (d,  $J = 1.6$ , 1H), 4.24 (d,  $J = 1.6$ , 1H).

$^{13}\text{C NMR}$  (150 MHz,  $\text{CDCl}_3$ )  $\delta$  160.7, 134.5, 134.3, 129.7, 129.6, 129.4, 129.3, 128.9, 126.7, 78.7, 72.0, 46.1.

HRMS: Calculated  $[\text{M}+\text{H}]^+$  for  $\text{C}_{16}\text{H}_{15}\text{BrNO}_2^+$ : 332.0281, found: 332.0288

FTIR ( $\text{cm}^{-1}$ ): 3033, 3005, 2948, 1785, 1522, 1497, 1456, 1360, 1204, 1076, 1034, 956, 907, 740, 696.

### rac 3-bromo-1-((4-methoxybenzyl)oxy)-4-phenylazetidin-2-one (2c)

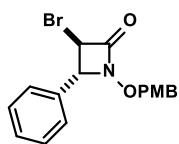

Following the general procedures for the synthesis of  $\beta$ -lactams, in an 8-mL scintillation vial open to air, compound **1c** (198.8 mg, 0.5 mmol) was dissolved in HFIP (2.5 mL, 0.2 M). NBS (134.9 mg, 1.5 equiv.) was then added, and the reaction mixture was stirred for 60 min. After completion, the reaction was concentrated *in vacuo* and purified by column chromatography on silica gel (90:10 Hexanes:EtOAc) to afford rac 3-bromo-1-((4-methoxybenzyl)oxy)-4-phenylazetidin-2-one **2c** as a colorless oil (72.5 mg, 40%).

$^1\text{H NMR}$  (600 MHz,  $\text{CDCl}_3$ )  $\delta$  7.39 – 7.37 (m, 3H), 7.27 – 7.24 (m, 2H), 7.22 – 7.20 (m, 2H), 6.89 – 6.86 (m, 2H), 4.98 (d,  $J = 11.1$  Hz, 1H), 4.87 (d,  $J = 11.1$  Hz, 1H), 4.43 (d,  $J = 1.6$  Hz, 1H), 4.24 (d,  $J = 1.6$  Hz, 1H), 3.83 (s, 3H).

$^{13}\text{C NMR}$  (150 MHz,  $\text{CDCl}_3$ )  $\delta$  160.7, 160.6, 134.4, 131.4, 129.7, 129.2, 129.2, 126.7, 126.5, 114.2, 78.3, 72.0, 55.5, 46.1.

**HRMS:** Calculated  $[M+H]^+$  for  $C_{17}H_{17}BrNO_3^+$ : 362.0386, found: 362.0386

**FTIR ( $cm^{-1}$ ):** 3033, 3003, 2937, 2837, 1781. 1611, 1513, 1456, 1303, 1250, 1175, 1029, 953, 849, 819, 725, 696.

### ***rac* 3-bromo-1-((*tert*-butyldimethylsilyl)-oxy)-4-phenylazetidin-2-one (2d)**

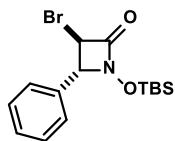

Following the general procedures for the synthesis of  $\beta$ -lactams, in an 8-mL scintillation vial open to air, compound **1d** (195.9 mg, 0.5 mmol) was dissolved in HFIP (2.5 mL, 0.2 M). NBS (134.9 mg, 1.5 equiv.) was then added, and the reaction mixture was stirred for 60 min. After completion, the reaction was concentrated *in vacuo* and purified by column chromatography on silica gel (90:10 Hexanes:EtOAc) to afford *rac* 3-bromo-1-((*tert*-butyldimethylsilyl)-oxy)-4-phenylazetidin-2-one **2d** as a colorless oil (121.2 mg, 68%).

**$^1H$  NMR (600 MHz,  $CDCl_3$ )**  $\delta$  7.45 – 7.41 (m, 3H), 7.35 – 7.34 (m, 2H), 4.81 (d,  $J = 1.5$  Hz, 1H), 4.34 (d,  $J = 1.5$  Hz, 1H), 0.89 (s, 9H), 0.22 (s, 3H), 0.16 (s, 3H).

**$^{13}C$  NMR (150 MHz,  $CDCl_3$ )**  $\delta$  160.3, 134.2, 129.7, 129.3, 126.9, 126.9, 73.1, 46.2, 25.6, -4.8, -4.8.

**HRMS:** Calculated  $[M+H]^+$  for  $C_{15}H_{23}BrNO_2Si^+$ : 356.0676, found: 356.0683

**FTIR ( $cm^{-1}$ ):** 2952, 2931, 2886, 2886, 1785, 1472, 1457. 1255, 1033, 958, 833, 788, 734, 696.

### ***rac* 3-bromo-1-phenoxy-4-phenylazetidin-2-one (2e)**

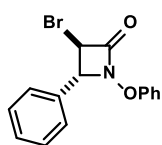

Following the general procedures for the synthesis of  $\beta$ -lactams, in an 8-mL scintillation vial open to air, compound **1e** (176.8 mg, 0.5 mmol) was dissolved in HFIP (2.5 mL, 0.2 M). NBS (134.9 mg, 1.5 equiv.) was then added, and the reaction mixture was stirred for 60 min. After completion, the reaction was concentrated *in vacuo* and purified by column chromatography on silica gel (90:10 Hexanes:EtOAc) to afford *rac* 3-bromo-1-phenoxy-4-phenylazetidin-2-one **2e** as a pale-pink solid (79.5 mg, 50%).

**$^1H$  NMR (600 MHz,  $CDCl_3$ )**  $\delta$  7.44 – 7.41 (m, 5H), 7.36 – 7.35 (m, 3H), 6.96 – 6.95 (m, 2H), 5.08 (d,  $J = 1.8$  Hz, 1H), 4.48 (d,  $J = 1.9$  Hz, 1H).

**$^{13}C$  NMR (150 MHz,  $CDCl_3$ )**  $\delta$  161.3, 157.3, 133.6, 132.9, 130.0, 129.5, 126.8, 117.2, 116.7, 71.8, 45.5.

**HRMS:** Calculated  $[M+H]^+$  for  $C_{15}H_{13}BrNO_2^+$ : 318.0124, found: 318.0126

**Melting Point:** 96.2 – 97.2  $^{\circ}C$

**FTIR ( $cm^{-1}$ ):** 3093, 3065, 3018, 2938, 1797, 1580, 1479, 1456, 1365, 1192, 1166, 1154, 1144, 1073, 1036, 1006, 949, 848, 820, 754, 725, 696.

### ***rac* 1-(benzyloxy)-3-bromo-4-(naphthalen-2-yl)azetidin-2-one (2f)**

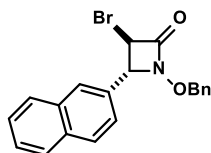

Following the general procedures for the synthesis of  $\beta$ -lactams, in an 8-mL scintillation vial open to air, compound **1f** (208.8 mg, 0.5 mmol) was dissolved in HFIP (2.5 mL, 0.2 M). NBS (134.9 mg, 1.5 equiv.) was then added, and the reaction mixture was stirred for 60 min. After completion, the reaction was concentrated *in vacuo* and purified by column chromatography on silica gel (90:10 Hexanes:EtOAc) to afford *rac* 1-(benzyloxy)-3-bromo-4-(naphthalen-2-yl)azetidin-2-one **2f** as a white solid (91.7 mg, 48%).

**<sup>1</sup>H NMR (600 MHz, CDCl<sub>3</sub>)** δ 7.87 – 7.81 (m, 3H), 7.67 (s, 1H), 7.59 – 7.52 (m, 2H), 7.39 – 7.30 (m, 5H), 7.28 (dd, *J* = 8.5, 1.8 Hz, 1H), 5.05 (d, *J* = 11.3 Hz, 1H), 4.96 (d, *J* = 11.3 Hz, 1H), 4.59 (d, *J* = 1.6 Hz, 1H), 4.33 (d, *J* = 1.7 Hz, 1H).

**<sup>13</sup>C NMR (150 MHz, CDCl<sub>3</sub>)** δ 160.8, 134.5, 133.9, 133.2, 131.6, 129.7, 129.6, 129.4, 129.4, 128.9, 128.2, 128.0, 127.1, 127.0, 123.1, 78.7, 72.3, 46.1.

**HRMS:** Calculated [M+H]<sup>+</sup> for C<sub>20</sub>H<sub>17</sub>BrNO<sub>2</sub><sup>+</sup>: 404.0257, found: 404.0257

**Melting Point:** 95.6 – 98.5 °C

**FTIR (cm<sup>-1</sup>):** 33.94, 32.65, 3059, 3031, 2942, 1780, 1455, 1310, 1209, 1180, 1159, 1031, 967, 946, 905, 785, 750, 695.

### ***rac* 1-(benzyloxy)-3-bromo-4-(naphthalen-1-yl)azetid-2-one (2g)**

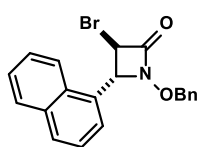

Following the general procedures for the synthesis of β-lactams, in an 8-mL scintillation vial open to air, compound **1g** (208.8 mg, 0.5 mmol) was dissolved in HFIP (2.5 mL, 0.2 M). NBS (134.9 mg, 1.5 equiv.) was then added, and the reaction mixture was stirred for 60 min. After completion, the reaction was concentrated *in vacuo* and purified by column chromatography on silica gel (90:10 Hexanes:EtOAc) to afford *rac* 1-(benzyloxy)-3-bromo-4-(naphthalen-2-yl)azetid-2-one **2g** as a colorless oil (91.7 mg, 48%).

**<sup>1</sup>H NMR (600 MHz, CDCl<sub>3</sub>)** δ 7.91 – 7.90 (m, 1H), 7.86 (d, *J* = 8.2 Hz, 1H), 7.81 – 7.80 (m, 1H), 7.60 – 7.58 (m, 1H), 7.57 – 7.55 (m, 2H), 7.48 (dd, *J* = 8.2, 7.2 Hz, 1H), 7.41 – 7.39 (m, 2H), 7.38 – 7.33 (m, 3H), 5.19 (s, 1H), 5.18 (d, *J* = 11.1 Hz, 1H), 5.08 (d, *J* = 11.1 Hz, 1H), 4.20 (d, *J* = 1.6 Hz, 1H).

**<sup>13</sup>C NMR (150 MHz, CDCl<sub>3</sub>)** δ 160.2, 134.2, 133.8, 131.1, 130.6, 129.9, 129.8, 129.6, 129.6, 129.2, 129.0, 129.0, 127.2, 126.5, 125.6, 123.5, 122.8, 78.5, 69.3, 46.1.

**HRMS:** Calculated [M+H]<sup>+</sup> for C<sub>20</sub>H<sub>17</sub>BrNO<sub>2</sub><sup>+</sup>: 404.0257, found: 404.0261

**FTIR (cm<sup>-1</sup>):** 3090, 3062, 3033, 3007, 2945, 2881, 1785, 1497, 1455, 1324, 1180, 1044, 947, 797, 792, 780, 766, 698.

### ***rac* 3-chloro-1-methoxy-4-phenylazetid-2-one (2h)**

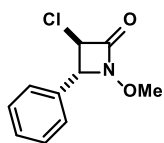

Following the general procedures for the synthesis of β-lactams, in an 8-mL scintillation vial open to air, compound **1a** (145.7 mg, 0.5 mmol) was dissolved in HFIP (2.5 mL, 0.2 M). NCS (100.1 mg, 1.5 equiv.) was then added, and the reaction mixture was stirred for 60 min. After completion, the reaction was concentrated *in vacuo* and purified by column chromatography on silica gel (90:10 Hexanes:EtOAc) to afford *rac* 3-chloro-1-methoxy-4-phenylazetid-2-one **2h** as a colorless oil (22.2 mg, 21%).

**<sup>1</sup>H NMR (600 MHz, CDCl<sub>3</sub>)** δ 7.46 – 7.42 (m, 3H), 7.39 – 7.38 (m, 2H), 4.85 (d, *J* = 1.7 Hz, 1H), 4.35 (d, *J* = 1.7 Hz, 1H), 3.81 (s, 3H).

**<sup>13</sup>C NMR (150 MHz, CDCl<sub>3</sub>)** δ 160.2, 134.2, 129.9, 129.4, 126.8, 70.6, 64.2, 59.8.

**HRMS:** Calculated [M+H]<sup>+</sup> for C<sub>10</sub>H<sub>11</sub>ClNO<sub>2</sub><sup>+</sup>: 212.0473, found: 212.0477.

**FTIR (cm<sup>-1</sup>):** 3033, 2990, 2940, 1789, 1498, 1457, 1365, 1076, 1040, 980, 740, 698.



### rac 3-iodo-1-methoxy-4-phenylazetididin-2-one (2i)

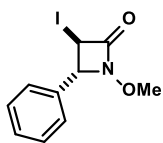

Following the general procedures for the synthesis of  $\beta$ -lactams, in an 8-mL scintillation vial open to air, compound **1a** (145.7 mg, 0.5 mmol) was dissolved in HFIP (2.5 mL, 0.2 M). NIS (168.7 mg, 1.5 equiv.) was then added, and the reaction mixture was stirred for 60 min. After completion, the reaction was concentrated *in vacuo* and purified by column chromatography on silica gel (90:10 Hexanes:EtOAc) to afford rac 3-iodo-1-methoxy-4-phenylazetididin-2-one **2i** as a colorless oil (59.1 mg, 39%).

**$^1\text{H}$  NMR (600 MHz,  $\text{CDCl}_3$ )**  $\delta$  7.44 – 7.42 (m, 3H), 7.41 – 7.39 (m, 2H), 4.99 (d,  $J$  = 1.9 Hz, 1H), 4.36 (d,  $J$  = 1.9 Hz, 1H), 3.78 (s, 3H).

**$^{13}\text{C}$  NMR (150 MHz,  $\text{CDCl}_3$ )**  $\delta$  162.1, 135.1, 129.8, 129.4, 126.5, 71.8, 63.9, 17.4

**HRMS:** Calculated  $[\text{M}+\text{H}]^+$  for  $\text{C}_{10}\text{H}_{11}\text{INO}_2^+$ : 303.9829, found: 303.9832.

**FTIR ( $\text{cm}^{-1}$ ):** 3032, 2991, 2937, 1773, 1496, 1456, 1363, 1305, 1284, 1126, 1031, 972, 840, 713, 695.

### rac 1-(benzyloxy)-3,3-dibromo-4-phenylazetididin-2-one (2j)

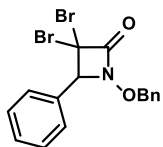

Following the general procedures for the synthesis of  $\beta$ -lactams, in an 8-mL scintillation vial open to air, compound **1j** (223.23 mg, 0.5 mmol) was dissolved in HFIP (2.5 mL, 0.2 M). NBS (134.9 mg, 1.5 equiv.) was then added, and the reaction mixture was stirred for 60 min. After completion, the reaction was concentrated *in vacuo* and purified by column chromatography on silica gel (90:10 Hexanes:EtOAc) to afford rac 1-(benzyloxy)-3,3-dibromo-4-phenylazetididin-2-one **2j** as a yellow crystals (129.5 mg, 63%).

**$^1\text{H}$  NMR (600 MHz,  $\text{CDCl}_3$ )**  $\delta$  7.44 – 7.40 (m, 4H), 7.39 – 7.36 (m, 4H), 7.23 – 7.32 (m, 2H), 5.14 (d,  $J$  = 11.2 Hz, 1H), 5.03 (d,  $J$  = 11.2 Hz, 1H), 4.90 (s, 1H).

**$^{13}\text{C}$  NMR (150 MHz,  $\text{CDCl}_3$ )**  $\delta$  159.0, 134.0, 132.6, 130.1, 129.8, 129.7, 129.0, 128.8, 128.0, 79.5, 78.7, 53.0.

**HRMS:** Calculated  $[\text{M}+\text{H}]^+$  for  $\text{C}_{16}\text{H}_{14}\text{Br}_2\text{NO}_2^+$ : 411.9366, found: 411.9372.

**Melting Point:** 77.4 – 81.3  $^\circ\text{C}$

**FTIR ( $\text{cm}^{-1}$ ):** 3066, 0325, 2954, 2891, 1782, 1498, 1454, 1377, 1365, 1216, 1150, 1052, 942, 908, 844, 767, 748, 695.

### rac 1-(benzyloxy)-3-bromo-3-chloro-4-phenylazetididin-2-one (2k)

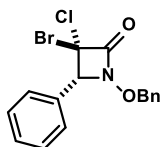

Following the general procedures for the synthesis of  $\beta$ -lactams, in an 8-mL scintillation vial open to air, compound **1k** (223.23 mg, 0.5 mmol) was dissolved in HFIP (2.5 mL, 0.2 M). NBS (134.9 mg, 1.5 equiv.) was then added, and the reaction mixture was stirred for 60 min. After completion, the reaction was concentrated *in vacuo* and purified by column chromatography on silica gel (90:10 Hexanes:EtOAc) to afford rac 1-(benzyloxy)-3-bromo-3-chloro-4-phenylazetididin-2-one **2k** as a white solid (129.5 mg, 45%).

**$^1\text{H}$  NMR (600 MHz,  $\text{CDCl}_3$ )**  $\delta$  7.44 – 7.39 (m, 4H), 7.37 – 7.36 (m, 2H), 7.24 – 7.22 (m, 2H), 5.13 (d,  $J$  = 11.2 Hz, 1H), 5.01 (d,  $J$  = 11.2 Hz, 1H), 4.93 (s, 1H).

**$^{13}\text{C}$  NMR (150 MHz,  $\text{CDCl}_3$ )**  $\delta$  158.6, 133.9, 131.2, 130.0, 129.6, 129.6, 128.9, 128.7, 128.1, 79.8, 78.6, 66.7.

**HRMS:** Calculated  $[\text{M}+\text{H}]^+$  for  $\text{C}_{16}\text{H}_{14}\text{BrClNO}_2^+$ : 365.9891, found: 365.9898.

**Melting Point:** 67.9 – 70.5 °C

**FTIR (cm<sup>-1</sup>):** 3066, 3035, 2955, 2893, 1784, 1498, 1455, 1379, 1218, 1151, 1001, 948, 757, 749, 696.

### ***rac* 1-(benzyloxy)-3-bromo-3-methyl-4-phenylazetidin-2-one (2l)**

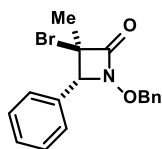

Following the general procedures for the synthesis of  $\beta$ -lactams, in an 8-mL scintillation vial open to air, compound **1l** (190.8 mg, 0.5 mmol) was dissolved in HFIP (2.5 mL, 0.2 M). NBS (134.9 mg, 1.5 equiv.) was then added, and the reaction mixture was stirred for 60 min. After completion, the reaction was concentrated *in vacuo* and purified by column chromatography on silica gel (90:10 Hexanes:EtOAc) to afford *rac* 1-(benzyloxy)-3-bromo-3-methyl-4-phenylazetidin-2-one **2l** as a white crystals (90 mg, 52%).

**<sup>1</sup>H NMR (600 MHz, CDCl<sub>3</sub>)**  $\delta$  7.40 – 7.35 (m, 8H), 7.22 – 7.20 (m, 2H), 5.10 (d,  $J$  = 11.1 Hz, 1H), 5.04 (d,  $J$  = 11.2 Hz, 1H), 4.84 (s, 1H), 1.35 (s, 3H).

**<sup>13</sup>C NMR (150 MHz, CDCl<sub>3</sub>)**  $\delta$  163.4, 134.4, 132.9, 129.7, 129.4, 129.3, 129.0, 129.0, 128.9, 127.2, 78.3, 76.8, 59.4, 21.9.

**HRMS:** Calculated [M+H]<sup>+</sup> for C<sub>17</sub>H<sub>17</sub>BrNO<sub>2</sub><sup>+</sup>: 347.0438, found: 347.0439.

**Melting Point:** 82.2 – 84.2 °C

**FTIR (cm<sup>-1</sup>):** 3034, 2985, 2891, 1771, 1497, 1456, 1439, 1383, 1217, 1157, 1057, 957, 909, 752, 741, 697.

### ***rac* 1-(benzyloxy)-3-bromo-3-butyl-4-phenylazetidin-2-one (2m)**

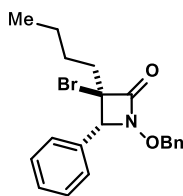

Following the general procedures for the synthesis of  $\beta$ -lactams, in an 8-mL scintillation vial open to air, compound **1m** (211.8 mg, 0.5 mmol) was dissolved in HFIP (2.5 mL, 0.2 M). NBS (134.9 mg, 1.5 equiv.) was then added, and the reaction mixture was stirred for 60 min. After completion, the reaction was concentrated *in vacuo* and purified by column chromatography on silica gel (90:10 Hexanes:EtOAc) to afford *rac* 1-(benzyloxy)-3-bromo-3-butyl-4-phenylazetidin-2-one **2m** as a colorless oil (110 mg, 57%).

**<sup>1</sup>H NMR (600 MHz, CDCl<sub>3</sub>)**  $\delta$  7.39 – 7.32 (m, 8H), 7.25 – 7.21 (m, 2H), 5.08 (d,  $J$  = 11.2 Hz, 1H), 5.02 (d,  $J$  = 11.2 Hz, 1H), 4.84 (s, 1H), 1.59 – 1.54 (m, 1H), 1.45 – 1.34 (m, 2H), 1.07 – 0.99 (m, 2H), 0.97 – 0.90 (m, 1H), 0.63 (t,  $J$  = 7.1 Hz, 3H).

**<sup>13</sup>C NMR (150 MHz, CDCl<sub>3</sub>)**  $\delta$  163.3, 134.5, 132.8, 129.7, 129.3, 129.3, 128.9, 128.8, 127.6, 78.2, 76.9, 65.9, 33.5, 27.2, 22.3, 13.6.

**HRMS:** Calculated [M+H]<sup>+</sup> for C<sub>20</sub>H<sub>23</sub>BrNO<sub>2</sub><sup>+</sup>: 388.0907, found: 388.0915.

**FTIR (cm<sup>-1</sup>):** 3065, 3033, 2956, 2872, 1781, 1497, 1455, 1358, 1213, 1169, 971, 942, 907, 745, 696.

### ***rac* 1-(benzyloxy)-3-bromo-4-phenyl-3-(pyridin-3-yl)azetidin-2-one (2n)**

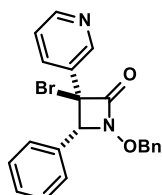

Following the general procedures for the synthesis of  $\beta$ -lactams, in an 8-mL scintillation vial open to air, compound **1n** (204.6 mg, 0.5 mmol) was dissolved in HFIP (2.5 mL, 0.2 M). NBS (134.9 mg, 1.5 equiv.) was then added, and the reaction mixture was stirred for 60 min. After completion, the reaction was concentrated *in vacuo* and purified by column

chromatography on silica gel (90:10 Hexanes:EtOAc) to afford *rac* 1-(benzyloxy)-3-bromo-4-phenyl-3-(pyridin-3-yl)azetid-2-one **2n** as a colorless oil (61.4 mg, 30%).

**<sup>1</sup>H NMR (600 MHz, CDCl<sub>3</sub>)** δ 8.35 (dd, *J* = 2.4, 0.8 Hz, 1H), 8.31 (dd, *J* = 4.8, 1.6 Hz, 1H), 7.46 (ddd, *J* = 8.1, 2.4, 1.6 Hz, 1H), 7.42 – 7.38 (m, 5H), 7.21 – 7.18 (m, 1H), 7.17 – 7.14 (m, 2H), 6.99 (ddd, *J* = 8.1, 4.8, 0.9 Hz, 1H), 6.90 (d, *J* = 7.0 Hz, 1H), 5.14 (d, *J* = 11.2 Hz, 1H), 5.09 (s, 1H), 5.03 (d, *J* = 11.2 Hz, 1H).

**<sup>13</sup>C NMR (150 MHz, CDCl<sub>3</sub>)** δ 161.3, 149.7, 149.6, 135.8, 134.4, 132.1, 131.0, 129.7, 129.7, 129.6, 129.0, 128.9, 127.9, 122.0, 78.7, 78.7, 60.1.

**HRMS:** Calculated [M+H]<sup>+</sup> for C<sub>21</sub>H<sub>18</sub>BrN<sub>2</sub>O<sub>2</sub><sup>+</sup>: 409.0546, found: 409.0552.

**FTIR (cm<sup>-1</sup>):** 3034, 2932, 1786, 1497, 1456, 1417, 1364, 1060, 1029, 945, 749, 698.

### *rac* 1-(benzyloxy)-3-(2-methoxyphenyl)-4-phenylazetid-2-one (**2o**)

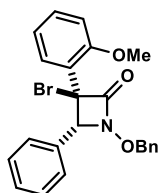

Following the general procedures for the synthesis of β-lactams, in an 8-mL scintillation vial open to air, compound **1o** (237 mg, 0.5 mmol) was dissolved in HFIP (2.5 mL, 0.2 M). NBS (134.9 mg, 1.5 equiv.) was then added, and the reaction mixture was stirred for 60 min. After completion, the reaction was concentrated *in vacuo* and purified by column chromatography on silica gel (90:10 Hexanes:EtOAc) to afford *rac* 1-(benzyloxy)-3-bromo-3-(2-methoxyphenyl)-4-phenylazetid-2-one **2o** as a white crystalline solid (109 mg, 50%).

**<sup>1</sup>H NMR (600 MHz, CDCl<sub>3</sub>)** δ 7.91 (d, *J* = 2.5 Hz, 1H), 7.47 (dd, *J* = 8.7, 2.5 Hz, 1H), 7.44 – 7.42 (m, 3H), 7.36 – 7.35 (m, 2H), 7.30 – 7.27 (m, 1H), 7.24 – 7.18 (m, 4H), 6.80 (d, *J* = 8.8 Hz, 1H), 5.05 (d, *J* = 11.1 Hz, 1H), 4.90 (d, *J* = 11.1 Hz, 1H), 4.64 (s, 1H), 3.83 (s, 3H).

**<sup>13</sup>C NMR (150 MHz, CDCl<sub>3</sub>)** δ 161.8, 155.9, 134.2, 134.1, 133.6, 130.5, 129.7, 129.4, 129.3, 129.2, 128.7, 128.6, 128.1, 113.3, 113.1, 78.2, 74.1, 61.8, 55.5.

**HRMS:** Calculated [M+H]<sup>+</sup> for C<sub>23</sub>H<sub>21</sub>BrNO<sub>3</sub><sup>+</sup>: 438.0699, found: 438.0700.

**Melting Point:** 114.2 – 115.5 °C

**FTIR (cm<sup>-1</sup>):** 3061, 3038, 2940, 1783, 1489, 1456, 1394, 1379, 1265, 1235, 1021, 886, 749, 697.

### (*E*)-1-(benzyloxy)-3-(bromo(phenyl)methylene)-6-methoxyindolin-2-one (**3p**)

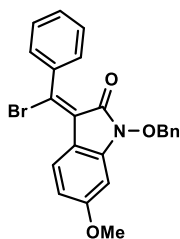

Following the general procedures for the synthesis of β-lactams, in an 8-mL scintillation vial open to air, compound **1p** (236.9 mg, 0.5 mmol) was dissolved in HFIP (2.5 mL, 0.2 M). NBS (134.9 mg, 1.5 equiv.) was then added, and the reaction mixture was stirred for 60 min. After completion, the reaction was concentrated *in vacuo* and purified by column chromatography on silica gel (95:5 Hexanes:EtOAc) to afford (*E*)-1-(benzyloxy)-3-(bromo(phenyl)methylene)-6-methoxyindolin-2-one **3p** as an orange crystalline solid

(108 mg, 50%).

**<sup>1</sup>H NMR (600 MHz, CDCl<sub>3</sub>)** δ 7.77 (s, 1H), 7.71 (s, 1H), 7.63 – 7.61 (m, 2H), 7.51 – 7.47 (m, 4H), 7.46 – 7.43 (m, 1H), 7.40 – 7.37 (m, 3H), 6.08 (s, 1H), 5.24 (s, 2H), 3.71 (s, 3H).

**<sup>13</sup>C NMR (150 MHz, CDCl<sub>3</sub>)** δ 165.1, 157.2, 142.3, 136.7, 135.0, 134.6, 130.3, 130.1, 129.6, 129.4, 129.0, 127.3, 123.6, 111.3, 103.8, 93.2, 79.1, 56.5.

**HRMS:** Calculated [M+H]<sup>+</sup> for C<sub>23</sub>H<sub>19</sub>BrNO<sub>3</sub><sup>+</sup>: 436.0543, found: 403.0552.

**Melting Point:** 162.0 – 167.0 °C

FTIR (cm<sup>-1</sup>): 3061, 3030, 2958, 2899, 1703, 1611, 1474, 1446, 1385, 1224, 1204, 1173, 1049, 1014, 957, 906, 821, 746, 692.

#### **rac 1-(benzyloxy)-3-bromo-3,4-diphenylazetididin-2-one (2q)**

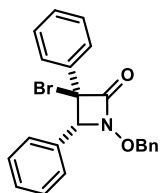

Following the general procedures for the synthesis of  $\beta$ -lactams, in an 8-mL scintillation vial open to air, compound **1q** (221.8 mg, 0.5 mmol) was dissolved in HFIP (2.5 mL, 0.2 M). NBS (134.9 mg, 1.5 equiv.) was then added, and the reaction mixture was stirred for 60 min. After completion, the reaction was concentrated *in vacuo* and purified by column chromatography on silica gel (90:10 Hexanes:EtOAc) to afford *rac* 1-(benzyloxy)-3-bromo-3,4-diphenylazetididin-2-one **2q** as a pale-yellow oil (32.1 mg, 16%).

<sup>1</sup>H NMR (600 MHz, CDCl<sub>3</sub>)  $\delta$  7.40 – 7.37 (m, 5H), 7.19 – 7.16 (m, 1H), 7.15 – 7.11 (m, 4H), 7.08 – 7.03 (m, 3H), 6.91 – 6.89 (m, 2H), 5.12 (d, *J* = 11.1 Hz, 1H), 5.10 (s, 1H), 5.01 (d, *J* = 11.1 Hz, 1H).

<sup>13</sup>C NMR (150 MHz, CDCl<sub>3</sub>)  $\delta$  162.2, 134.5, 134.5, 132.8, 129.7, 129.4, 129.2, 128.9, 128.8, 128.5, 128.5, 128.3, 128.2, 79.1, 78.5, 63.1.

HRMS: Calculated [M+H]<sup>+</sup> for C<sub>22</sub>H<sub>19</sub>BrNO<sub>2</sub><sup>+</sup>: 409.0594, found: 408.0596.

FTIR (cm<sup>-1</sup>): 3063, 3032, 2940, 1780, 1497, 1455, 1448, 1364, 1047, 944, 743, 693, 656.

#### **(E)-1-(benzyloxy)-3-(bromo(phenyl)methylene)indolin-2-one (3q)**

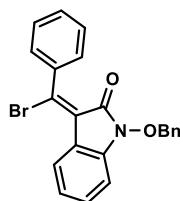

Following the general procedures for the synthesis of  $\beta$ -lactams, in an 8-mL scintillation vial open to air, compound **1q** (221.8 mg, 0.5 mmol) was dissolved in HFIP (2.5 mL, 0.2 M). NBS (134.9 mg, 1.5 equiv.) was then added, and the reaction mixture was stirred for 60 min. After completion, the reaction was concentrated *in vacuo* and purified by column chromatography on silica gel (95:5 Hexanes:EtOAc) to afford (*E*)-1-(benzyloxy)-3-(bromo(phenyl)methylene)indolin-2-one **3q** as a yellow solid (89 mg,

44%).

<sup>1</sup>H NMR (600 MHz, CDCl<sub>3</sub>)  $\delta$  7.92 (s, 1H), 7.68 (d, *J* = 1.8 Hz, 1H), 7.64 – 7.62 (m, 2H), 7.52 – 7.46 (m, 5H), 7.39 – 7.38 (m, 3H), 7.28 – 7.26 (m, 1H), 6.60 (d, *J* = -8.3 Hz, 1H), 5.24 (s, 2H).

<sup>13</sup>C NMR (150 MHz, CDCl<sub>3</sub>)  $\delta$  164.1, 140.0, 139.8, 134.4, 134.4, 134.2, 132.5, 130.5, 130.1, 129.5, 129.5, 129.1, 128.9, 125.5, 124.0, 119.8, 115.0, 109.4, 78.7.

HRMS: Calculated [M+H]<sup>+</sup> for C<sub>22</sub>H<sub>17</sub>BrNO<sub>2</sub><sup>+</sup>: 406.0437, found: 406.0437.

Melting Point: 138.1 – 140.5 °C

FTIR (cm<sup>-1</sup>): 3064, 3034, 2919, 2850, 1709, 1603, 1446, 1379, 1309, 1266, 1205, 1107, 1056, 942, 902, 801, 744, 691..

#### **rac 1-(benzyloxy)-3-bromo-3-(4-nitrophenyl)-4-phenylazetididin-2-one (2r)**

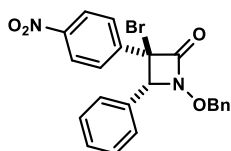

Following the general procedures for the synthesis of  $\beta$ -lactams, in an 8-mL scintillation vial open to air, compound **1r** (244 mg, 0.5 mmol) was dissolved in HFIP (2.5 mL, 0.2 M). NBS (134.9 mg, 1.5 equiv.) was then added, and the reaction mixture was stirred for 60 min. After completion, the reaction was concentrated *in*

*vacuo* and purified by column chromatography on silica gel (90:10 Hexanes:EtOAc) to afford *rac* 1-(benzyloxy)-3-bromo-3-(4-nitrophenyl)-4-phenylazetid-2-one **2r** as a yellow oil (147 mg, 65%).

**<sup>1</sup>H NMR (600 MHz, CDCl<sub>3</sub>)** δ 7.90 (d, *J* = 8.9 Hz, 2H), 7.43 – 7.41 (m, 1H), 7.39 – 7.38 (m, 4H), 7.32 (d, *J* = 8.9 Hz, 2H), 7.23 – 7.20 (m, 1H), 7.17 – 7.14 (m, 2H), 6.90 – 6.89 (m, 2H), 5.13 (d, *J* = 11.2 Hz, 1H), 5.07 (s, 1H), 5.03 (d, *J* = 11.2 Hz, 1H).

**<sup>13</sup>C NMR (150 MHz, CDCl<sub>3</sub>)** δ 161.1, 147.4, 141.5, 134.2, 131.8, 139.7, 129.6, 129.5, 129.4, 128.8, 128.8, 127.7, 123.2, 78.6, 78.6, 60.3.

**HRMS:** Calculated [M+H]<sup>+</sup> for C<sub>22</sub>H<sub>18</sub>BrN<sub>2</sub>O<sub>4</sub><sup>+</sup>: 453.044, found: 453.0456

**FTIR (cm<sup>-1</sup>):** 3060, 3032, 2943, 2875, 1783, 1604, 1519, 1456, 1343, 1212, 1149, 1045, 943, 851, 742, 694.

### *rac* 1-(benzyloxy)-3-bromo-4-methyl-4-(pyridin-2-yl)azetid-2-one (**2s**)

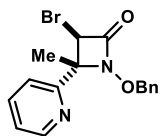

Following the general procedures for the synthesis of β-lactams, in an 8-mL scintillation vial open to air, compound **1s** (204.6 mg, 0.5 mmol) was dissolved in HFIP (2.5 mL, 0.2 M). NBS (134.9 mg, 1.5 equiv.) was then added, and the reaction mixture was stirred for 60 min. After completion, the reaction was concentrated *in vacuo* and purified by column chromatography on silica gel (90:10 Hexanes:EtOAc) to afford *rac* 1-(benzyloxy)-3-bromo-4-methyl-4-(pyridin-2-yl)azetid-2-one **2s** as a colorless oil (112.8 mg, 65%).

**<sup>1</sup>H NMR (600 MHz, CDCl<sub>3</sub>)** δ 8.62 (ddd, *J* = 4.7, 1.8, 0.9 Hz, 1H), 7.70 (td, *J* = 7.8, 1.9 Hz, 1H), 7.40 (dt, *J* = 7.9, 1.0 Hz, 1H), 7.46 – 7.32 (m, 5H), 7.27 – 7.25 (m, 1H), 5.08 (d, *J* = 11.0 Hz, 1H), 5.02 (d, 11.0 Hz, 1H), 4.94 (s, 1H), 1.66 (s, 3H).

**<sup>13</sup>C NMR (150 MHz, CDCl<sub>3</sub>)** δ 161.7, 158.2, 149.8, 137.1, 135.1, 129.6, 129.3, 128.7, 123.5, 120.7, 79.4, 71.2, 51.9, 20.2.

**HRMS:** Calculated [M+H]<sup>+</sup> for C<sub>16</sub>H<sub>16</sub>BrN<sub>2</sub>O<sub>2</sub><sup>+</sup>: 347.0390, found: 347.0395.

**FTIR (cm<sup>-1</sup>):** 3059, 3028, 3004, 2940, 1784, 1588, 1470, 1434, 1380, 1294, 1213, 1062, 909, 750, 698.

### *rac* 1-(benzyloxy)-3-bromo-4-methyl-4-(pyridin-3-yl)azetid-2-one (**2t**)

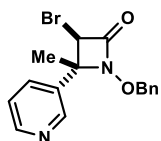

Following the general procedures for the synthesis of β-lactams, in an 8-mL scintillation vial open to air, compound **1t** (204.6 mg, 0.5 mmol) was dissolved in HFIP (2.5 mL, 0.2 M). NBS (134.9 mg, 1.5 equiv.) was then added, and the reaction mixture was stirred for 60 min. After completion, the reaction was concentrated *in vacuo* and purified by column chromatography on silica gel (90:10 Hexanes:EtOAc) to afford *rac* 1-(benzyloxy)-3-bromo-4-methyl-4-(pyridin-3-yl)azetid-2-one **2t** as a colorless oil (119.8 mg, 69%).

**<sup>1</sup>H NMR (600 MHz, CDCl<sub>3</sub>)** δ 8.64 – 8.61 (m, 2H), 7.64 (ddd, *J* = 8.1, 2.5, 1.5 Hz, 1H), 7.37 (s, 5H), 7.31 (t, 6.6 Hz, 1H), 5.10 (s, 2H), 4.54 (s, 1H), 1.63 (s, 3H).

**<sup>13</sup>C NMR (150 MHz, CDCl<sub>3</sub>)** δ 161.0, 149.9, 147.1, 134.7, 133.2, 130.0, 129.6, 129.5, 128.9, 213.8, 79.5, 69.2, 52.8, 21.7.

**HRMS:** Calculated [M+H]<sup>+</sup> for C<sub>16</sub>H<sub>16</sub>BrN<sub>2</sub>O<sub>2</sub><sup>+</sup>: 347.0390, found: 347.0394.

**FTIR (cm<sup>-1</sup>):** 3032, 2987, 2936, 1778, 1574, 1481, 1418, 1381, 1283, 1187, 1060, 1021, 907, 818, 742, 696.

### ***rac* 1-(benzyloxy)-3-bromo-4,4-diphenylazetididin-2-one (**2u**)**

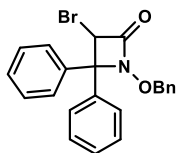

Following the general procedures for the synthesis of  $\beta$ -lactams, in an 8-mL scintillation vial open to air, compound **1u** (221.8 mg, 0.5 mmol) was dissolved in HFIP (2.5 mL, 0.2 M). NBS (134.9 mg, 1.5 equiv.) was then added, and the reaction mixture was stirred for 60 min. After completion, the reaction was concentrated *in vacuo* and purified by column chromatography on silica gel (90:10 Hexanes:EtOAc) to afford *rac* 1-(benzyloxy)-3-bromo-4,4-diphenylazetididin-2-one **2u** as a white crystalline solid (181 mg, 89%).

**<sup>1</sup>H NMR (600 MHz, CDCl<sub>3</sub>)**  $\delta$  7.41 – 7.35 (m, 5H), 7.19 – 7.16 (m, 1H), 7.15 – 7.13 (m, 4H), 7.08 – 7.03 (m, 3H), 6.91 – 6.89 (m, 2H), 5.12 (d,  $J$  = 11.1 Hz, 1H), 5.10 (s, 1H), 5.01 (d,  $J$  = 11.1 Hz, 1H).

**<sup>13</sup>C NMR (150 MHz, CDCl<sub>3</sub>)**  $\delta$  162.2, 134.5, 134.5, 132.8, 129.7, 129.4, 129.2, 128.9, 128.8, 128.5, 128.3, 128.2, 79.1, 78.5, 63.1.

**HRMS:** Calculated [M+Na]<sup>+</sup> for C<sub>22</sub>H<sub>18</sub>BrNO<sub>2</sub>Na<sup>+</sup>: 430.0413, found: 430.0409.

**Melting Point:** 98.4 – 100.2 °C

**FTIR (cm<sup>-1</sup>):** 3062, 3033, 2955, 1778, 1496, 1447, 1374, 1216, 1180, 965, 906, 848, 731, 694.

### ***rac* 1-(benzyloxy)-3-bromo-4-methyl-4-phenylazetididin-2-one (**2v**)**

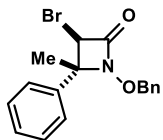

Following the general procedures for the synthesis of  $\beta$ -lactams, in an 8-mL scintillation vial open to air, compound **1v** (190.8 mg, 0.5 mmol) was dissolved in HFIP (2.5 mL, 0.2 M). NBS (134.9 mg, 1.5 equiv.) was then added, and the reaction mixture was stirred for 60 min. After completion, the reaction was concentrated *in vacuo* and purified by column chromatography on silica gel (90:10 Hexanes:EtOAc) to afford *rac* 1-(benzyloxy)-3-bromo-4-phenyl-3-(pyridin-3-yl)azetididin-2-one **2v** as a colorless oil (138.5 mg, 80%).

**<sup>1</sup>H NMR (600 MHz, CDCl<sub>3</sub>)**  $\delta$  7.41 – 7.33 (m, 10H), 5.09 (dd,  $J$  = 13.3, 2.4 Hz, 2H), 4.54 (s, 1H), 1.64 (s, 3H).

**<sup>13</sup>C NMR (150 MHz, CDCl<sub>3</sub>)**  $\delta$  161.2, 140.3, 134.8, 129.6, 129.3, 129.1, 128.8, 128.7, 125.4, 79.3, 70.8, 53.3, 21.9.

**HRMS:** Calculated [M+H]<sup>+</sup> for C<sub>17</sub>H<sub>17</sub>BrNO<sub>2</sub><sup>+</sup>: 346.0437, found: 346.0442.

**FTIR (cm<sup>-1</sup>):** 3063, 3032, 2993, 1779, 1497, 1448, 1361, 1276, 1219, 1057, 907, 807, 735, 662.

### ***rac* 1-(benzyloxy)-3-bromo-4,4-dimethylazetididin-2-one (**2w**)**

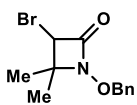

Following the general procedures for the synthesis of  $\beta$ -lactams, in an 8-mL scintillation vial open to air, compound **1w** (160 mg, 0.5 mmol) was dissolved in HFIP (2.5 mL, 0.2 M). NBS (134.9 mg, 1.5 equiv.) was then added, and the reaction mixture was stirred for 60 min. After completion, the reaction was concentrated *in vacuo* and purified by column chromatography on silica gel (90:10 Hexanes:EtOAc) to afford *rac* 1-(benzyloxy)-3-bromo-4,4-dimethylazetididin-2-one **2w** as a colorless oil (110.3mg, 78%).

**<sup>1</sup>H NMR (600 MHz, CDCl<sub>3</sub>)**  $\delta$  7.41 – 7.37 (m, 5H), 5.02 (d,  $J$  = 11.2 Hz, 1H), 4.97 (d,  $J$  = 11.2 Hz, 1H), 4.34 (s, 1H), 1.33 (s, 3H), 1.22 (s, 3H).

**<sup>13</sup>C NMR (150 MHz, CDCl<sub>3</sub>)**  $\delta$  161.0, 135.3, 129.6, 129.4, 128.8, 79.3, 66.6, 51.2, 23.7, 22.7.

**HRMS:** Calculated [M+H]<sup>+</sup> for C<sub>12</sub>H<sub>15</sub>BrNO<sub>2</sub><sup>+</sup>: 284.0281, found: 284.0282.

**FTIR (cm<sup>-1</sup>):** 3032, 2972, 2932, 1774, 1455, 1387, 1373, 1268, 1248, 1110, 1016, 954, 819, 748, 696.

### ***rac* methyl 1-(benzyloxy)-3-bromo-2-oxo-4-phenylazetidine-3-carboxylate (2x)**

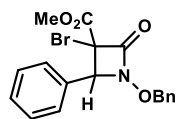

Following the general procedures for the synthesis of  $\beta$ -lactams, in an 8-mL scintillation vial open to air, compound **1x** (212.8 mg, 0.5 mmol) was dissolved in HFIP (2.5 mL, 0.2 M). NBS (134.9 mg, 1.5 equiv.) was then added, and the reaction mixture was stirred for 60 min. After completion, the reaction was concentrated *in vacuo* and purified by column chromatography on silica gel (90:10 Hexanes:EtOAc) to afford *rac* methyl 1-(benzyloxy)-3-bromo-2-oxo-4-phenylazetidine-3-**2x** as a pale-yellow oil (72 mg, 37%) as a 1:1 mixture of diastereomers.

#### **One diastereomer:**

**<sup>1</sup>H NMR (600 MHz, CDCl<sub>3</sub>)**  $\delta$  7.42 – 7.33 (m, 5H), 7.23 – 7.20 (m, 2H), 5.16 (d,  $J$  = 11.1 Hz, 1H), 5.06 – 5.04 (m, 1H), 4.71 (s, 1H), 3.30 (s, 3H).

**<sup>13</sup>C NMR (150 MHz, CDCl<sub>3</sub>)**  $\delta$  163.9, 158.3, 134.2, 131.3, 129.9, 129.6, 129.5, 129.0, 128.8, 127.3, 76.3, 70.3, 59.2, 53.3.

#### **Second diastereomer:**

**<sup>1</sup>H NMR (600 MHz, CDCl<sub>3</sub>)**  $\delta$  7.42 – 7.33 (m, 5H), 7.23 – 7.20 (m, 2H), 5.11 (d,  $J$  = 11.1 Hz, 1H), 5.06 – 5.04 (m, 2H), 3.88 (s, 3H).

**<sup>13</sup>C NMR (150 MHz, CDCl<sub>3</sub>)**  $\delta$  165.6, 158.4, 134.3, 132.6, 129.8, 129.7, 129.5, 128.8, 128.6, 128.2, 78.8, 70.3, 61.8, 54.4.

**HRMS:** Calculated  $[M+H]^+$  for C<sub>18</sub>H<sub>17</sub>BrNO<sub>4</sub><sup>+</sup>: 390.0335, found: 390.0336.

**FTIR (cm<sup>-1</sup>):** 3065, 3034, 2954, 1796, 1753, 1732, 1497, 1455, 1434, 1264, 1200, 1002, 748, 697.

### ***rac* methyl 1-(benzyloxy)-3-bromo-2-(4-methoxyphenyl)-4-oxoazetidine-3-carboxylate (2y)**

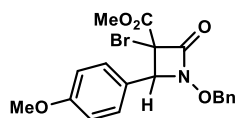

Following the general procedures for the synthesis of  $\beta$ -lactams, in an 8-mL scintillation vial open to air, compound **1y** (227.8 mg, 0.5 mmol) was dissolved in HFIP (2.5 mL, 0.2 M). NBS (134.9 mg, 1.5 equiv.) was then added, and the reaction mixture was stirred for 60 min. After completion, the reaction was concentrated *in vacuo* and purified by column chromatography on silica gel (90:10 Hexanes:EtOAc) to afford *rac* methyl 1-(benzyloxy)-3-bromo-2-(4-methoxyphenyl)-4-oxoazetidine-3-carboxylate **2y** as a colorless oil (168 mg, 80%).

#### **One diastereomer:**

**<sup>1</sup>H NMR (600 MHz, CDCl<sub>3</sub>)**  $\delta$  7.40 – 7.34 (m, 5H), 7.15 – 7.12 (m, 2H), 6.92 (d,  $J$  = 8.7 Hz, 2H), 5.09 (d,  $J$  = 11.2 Hz, 1H), 5.03 (d,  $J$  = 11.1 Hz, 1H), 5.00 (s, 1H), 3.87 (s, 3H), 3.83 (s, 3H).

**<sup>13</sup>C NMR (150 MHz, CDCl<sub>3</sub>)**  $\delta$  165.7, 160.7, 158.5, 134.4, 129.8, 129.6, 129.5, 128.8, 124.3, 114.0, 78.7, 70.2, 62.6, 55.5, 54.4.

#### **Second diastereomer:**

**<sup>1</sup>H NMR (600 MHz, CDCl<sub>3</sub>)**  $\delta$  7.40 – 7.34 (m, 5H), 7.15 – 7.12 (m, 2H), 6.86 (d,  $J$  = 8.7 Hz, 2H), 5.13 (d,  $J$  = 11.2 Hz, 1H), 5.03 (d,  $J$  = 11.1 Hz, 1H), 4.66 (s, 1H), 3.80 (s, 3H), 3.37 (s, 3H).

**<sup>13</sup>C NMR (150 MHz, CDCl<sub>3</sub>)**  $\delta$  164.0, 160.8, 158.4, 134.2, 129.8, 129.5, 129.0, 128.8, 123.0, 114.2, 78.7, 76.1, 59.2, 55.5, 53.4.

**HRMS:** Calculated  $[M+H]^+$  for C<sub>19</sub>H<sub>19</sub>BrNO<sub>5</sub><sup>+</sup>: 420.0441, found: 420.0444.

**FTIR (cm<sup>-1</sup>):** 3064, 3033, 3007, 2954, 2839, 1793, 1750, 1611, 1514, 1456, 1249, 1176, 1027, 1009, 950, 837, 746, 697.

### methyl *rac* 1-(benzyloxy)-3-bromo-2,2-diethyl-4-oxazetidine-3-carboxylate (**2z**)

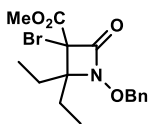

Following the general procedures for the synthesis of  $\beta$ -lactams, in an 8-mL scintillation vial open to air, compound **1z** (183 mg, 0.5 mmol) was dissolved in HFIP (2.5 mL, 0.2 M). NBS (134.9 mg, 1.5 equiv.) was then added, and the reaction mixture was stirred for 60 min. After completion, the reaction was concentrated *in vacuo* and purified by column chromatography on silica gel (90:10 Hexanes:EtOAc) to afford methyl *rac* 1-(benzyloxy)-3-bromo-2,2-diethyl-4-oxazetidine-3-carboxylate **2z** as a colorless oil (92 mg, 55%).

$^1\text{H NMR}$  (600 MHz,  $\text{CDCl}_3$ )  $\delta$  7.41 – 7.34 (m, 5H), 5.05 (q<sub>AB</sub>,  $J$  = 13.5 Hz, 2H), 3.82 (s, 3H), 1.87 (dq,  $J$  = 15.0, 7.5 Hz, 1H), 1.80 – 1.71 (m, 3H), 0.98 (t,  $J$  = 7.5 Hz, 3H), 0.94 (t,  $J$  = 7.5 Hz, 3H).

$^{13}\text{C NMR}$  (150 MHz,  $\text{CDCl}_3$ )  $\delta$  166.1, 158.5, 134.5, 129.8, 129.4, 128.7, 79.5, 75.8, 63.2, 53.7, 26.7, 25.0, 8.9, 8.7.

**HRMS:** Calculated  $[\text{M}+\text{H}]^+$  for  $\text{C}_{16}\text{H}_{21}\text{BrNO}_4^+$ : 370.0648, found: 370.0651.

**FTIR** ( $\text{cm}^{-1}$ ): 3032, 2979, 2950, 2886, 1788, 1740, 1522, 1456, 1436, 1376, 1234, 1203, 1186, 1100, 1027, 947, 907, 748, 697.

### methyl *rac* 1-(benzyloxy)-3-bromo-2-oxo-1-azaspiro[3.5]nonane-3-carboxylate (**2aa**)

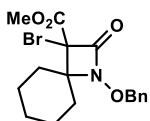

Following the general procedures for the synthesis of  $\beta$ -lactams, in an 8-mL scintillation vial open to air, compound **1aa** (235.8 mg, 0.5 mmol) was dissolved in HFIP (2.5 mL, 0.2 M). NBS (134.9 mg, 1.5 equiv.) was then added, and the reaction mixture was stirred for 60 min. After completion, the reaction was concentrated *in vacuo* and purified by column chromatography on silica gel (90:10 Hexanes:EtOAc) to afford methyl *rac* 1-(benzyloxy)-3-bromo-2-oxo-1-azaspiro[3.4]nonane carboxylate **2aa** as a colorless oil (105 mg, 55%).

$^1\text{H NMR}$  (600 MHz,  $\text{CDCl}_3$ )  $\delta$  7.43 – 7.38 (m, 5H), 5.08 (s, 2H), 3.83 (s, 3H), 1.94 – 1.90 (m, 1H), 1.74 – 1.68 (m, 2H), 1.62 – 1.59 (m, 4H), 1.51 (ddt,  $J$  = 12.6, 6.8, 3.7 Hz, 1H), 1.43 (dddd,  $J$  = 13.8, 11.7, 6.6, 3.2 Hz, 1H), 1.33 – 1.25 (m, 1H).

$^{13}\text{C NMR}$  (150 MHz,  $\text{CDCl}_3$ )  $\delta$  166.1, 158.2, 134.4, 129.9, 129.5, 128.7, 79.7, 72.5, 64.7, 53.8, 33.5, 31.2, 24.5, 23.5, 23.1.

**HRMS:** Calculated  $[\text{M}+\text{H}]^+$  for  $\text{C}_{17}\text{H}_{21}\text{BrNO}_4^+$ : 382.0648, found: 382.0656.

**FTIR** ( $\text{cm}^{-1}$ ): 3033, 2939, 2863, 1788, 1745, 1455, 1435, 1245, 1014, 1002, 943, 908, 849, 744, 697.

### *rac* 1-(benzyloxy)-2a-bromo-7b-methyl-1,2a,3,7b-tetrahydro-2H-indeno[1,2-b]azet-2-one (**2ab**)

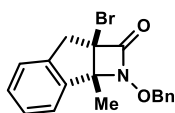

Following the general procedures for the synthesis of  $\beta$ -lactams, in an 8-mL scintillation vial open to air, compound **1ab** (196.8 mg, 0.5 mmol) was dissolved in HFIP (2.5 mL, 0.2 M). NBS (134.9 mg, 1.5 equiv.) was then added, and the reaction mixture was stirred for 60 min. After completion, the reaction was concentrated *in vacuo* and purified by column chromatography on silica gel (90:10 Hexanes:EtOAc) to afford *rac* 1-(benzyloxy)-2a-bromo-7b-methyl-1,2a,3,7b-tetrahydro-2H-indeno[1,2-b]azet-2-one **2ab** as a white solid (125 mg, 89%).



<sup>1</sup>H NMR (600 MHz, CDCl<sub>3</sub>) δ 7.39 – 7.37 (m, 3H), 7.35 – 7.33 (m, 2H), 7.32 – 7.27 (m, 2H), 7.27 – 7.26 (m, 1H), 7.22 (dt, *J* = 7.5, 1.0 Hz, 1H), 4.92 (d, *J* = 11.1 Hz, 1H), 4.84 (d, *J* = 11.1 Hz, 1H), 3.85 (d, *J* = 17.8 Hz, 1H), 3.37 (d, *J* = 17.8 Hz, 1H), 1.50 (s, 3H).

<sup>13</sup>C NMR (150 MHz, CDCl<sub>3</sub>) δ 164.9, 140.3, 139.5, 135.3, 129.9, 129.7, 129.3, 128.8, 127.7, 125.9, 124.9, 80.6, 79.2, 64.4, 42.2, 18.5.

HRMS: Calculated [M+H]<sup>+</sup> for C<sub>18</sub>H<sub>17</sub>BrNO<sub>2</sub><sup>+</sup>: 358.0437, found: 358.0442.

Melting Point: 89.7 – 93.9 °C

FTIR (cm<sup>-1</sup>): 3062, 3033, 3008, 2984, 2889, 1770, 1487, 1455, 1378, 1251, 1214, 1126, 1114, 970, 891, 741, 694.

### *tert*-butyl *rac* 1-(benzyloxy)-7b-bromo-2-oxo-1,2,2a,7b-tetrahydro-3H-azeto[3,2-*b*]indole-3-carboxylate (**2ac**)

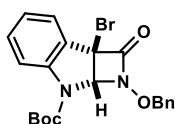

Following the general procedures for the synthesis of β-lactams, in an 8-mL scintillation vial open to air, compound **1ac** (240 mg, 0.5 mmol) was dissolved in HFIP (2.5 mL, 0.2 M). NBS (134.9 mg, 1.5 equiv.) was then added, and the reaction mixture was stirred for 60 min. After completion, the reaction was concentrated *in vacuo* and purified by column chromatography on silica gel (90:10 Hexanes:EtOAc) to afford *tert*-butyl *rac* 1-(benzyloxy)-7b-bromo-2-oxo-1,2,2a,7b-tetrahydro-3H-azeto[3,2-*b*]indole-3-carboxylate **2ac** as a white solid (95.5 mg, 43%).

<sup>1</sup>H NMR (600 MHz, CDCl<sub>3</sub>) δ 7.78 (d, *J* = 8.4 Hz, 1H), 7.50 (dd, *J* = 7.7, 1.4 Hz, 1H), 7.42 (dd, *J* = 7.2, 2.3 Hz, 2H), 7.38 – 7.32 (m, 4H), 7.16 (td, *J* = 7.6, 1.0 Hz, 1H), 5.25 (d, *J* = 1.6 Hz, 2H), 1.65 (s, 9H).

<sup>13</sup>C NMR (150 MHz, CDCl<sub>3</sub>) δ 156.9, 150.0, 141.3, 133.7, 131.7, 129.7, 129.5, 128.7, 126.7, 124.7, 122.2, 115.7, 88.1, 84.8, 79.2, 70.5, 28.3.

HRMS: Calculated [M+H]<sup>+</sup> for C<sub>21</sub>H<sub>22</sub>BrN<sub>2</sub>O<sub>4</sub><sup>+</sup>: 445.0757, found: 445.0761.

Melting Point: 106.9 – 109.4 °C

FTIR (cm<sup>-1</sup>): 3110, 3072, 3039, 2977, 2929, 1803, 1714, 1473, 1463, 1344, 1153, 1110, 1071, 956, 858, 7388, 697.

### *rac* 1-(benzyloxy)-3-bromo-1-azaspiro[3.6]decan-2-one (**2ad**)

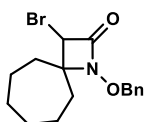

Following the general procedures for the synthesis of β-lactams, in an 8-mL scintillation vial open to air, compound **1ad** (187 mg, 0.5 mmol) was dissolved in HFIP (2.5 mL, 0.2 M). NBS (134.9 mg, 1.5 equiv.) was then added, and the reaction mixture was stirred for 60 min. After completion, the reaction was concentrated *in vacuo* and purified by column chromatography on silica gel (90:10 Hexanes:EtOAc) to afford *rac* 1-(benzyloxy)-3-bromo-1-azaspiro[3.9]decan-2-one **2ad** as a white solid (128 mg, 74%).

<sup>1</sup>H NMR (600 MHz, CDCl<sub>3</sub>) δ 7.40 – 7.37 (m, 5H), 5.00 (q, *J* = 10.8 Hz, 2H), 4.34 (s, 1H), 2.05 – 1.98 (m, 2H), 1.77 – 1.71 (m, 2H), 1.68 – 1.62 (m, 1H), 1.59 – 1.38 (m, 7H).

<sup>13</sup>C NMR (150 MHz, CDCl<sub>3</sub>) δ 161.2, 134.7, 129.6, 129.3, 128.7, 79.4, 72.7, 52.0, 36.7, 35.1, 29.6, 29.5, 22.9, 22.8.

HRMS: Calculated [M+H]<sup>+</sup> for C<sub>16</sub>H<sub>21</sub>BrNO<sub>2</sub><sup>+</sup>: 338.0750, found: 338.0761.

FTIR (cm<sup>-1</sup>): 3032, 2928, 2857, 1774, 1455, 1368, 1231, 1193, 1101, 954, 908, 745, 695.

### ***rac* 1-(benzyloxy)-3-bromo-1-azaspiro[3.5]nonan-2-one (2ae)**

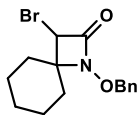

Following the general procedures for the synthesis of  $\beta$ -lactams, in an 8-mL scintillation vial open to air, compound **1ae** (178.8 mg, 0.5 mmol) was dissolved in HFIP (2.5 mL, 0.2 M). NBS (134.9 mg, 1.5 equiv.) was then added, and the reaction mixture was stirred for 60 min. After completion, the reaction was concentrated *in vacuo* and purified by column chromatography on silica gel (90:10 Hexanes:EtOAc) to afford *rac* 1-(benzyloxy)-3-bromo-1-azaspiro[3.5]nonan-2-one **2ae** as a colorless oil (113.2 mg, 70%).

**<sup>1</sup>H NMR (600 MHz, CDCl<sub>3</sub>)**  $\delta$  7.41 – 7.37 (m, 5H), 5.03 (d,  $J$  = 10.8 Hz, 1H), 4.98 (d,  $J$  = 10.8 Hz, 1H), 4.28 (s, 1H), 1.86 (ddd,  $J$  = 13.5, 12.1, 4.1 Hz, 1H), 1.82 – 1.77 (m, 2H), 1.69 – 1.65 (m, 1H), 1.61 – 1.57 (m, 2H), 1.55 – 1.46 (m, 2H), 1.33 (dtt,  $J$  = 13.5, 12.0, 3.6 Hz, 1H), 1.18 (dddd,  $J$  = 16.4, 15.0, 9.6, 3.7, 1H).

**<sup>13</sup>C NMR (150 MHz, CDCl<sub>3</sub>)**  $\delta$  161.3, 134.9, 129.7, 129.3, 128.8, 79.5, 69.4, 50.2, 34.2, 31.7, 24.5, 24.0, 23.5.

**HRMS:** Calculated [M+H]<sup>+</sup> for C<sub>15</sub>H<sub>19</sub>BrNO<sub>2</sub><sup>+</sup>: 324.0594, found: 324.0602.

**FTIR (cm<sup>-1</sup>):** 3032, 2934, 2856, 1775, 1453, 1364, 1168, 1051, 950, 905, 849, 740, 696.

### ***rac* 1-(benzyloxy)-3-bromo-1-azaspiro[3.4]octan-2-one (2af)**

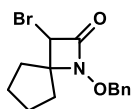

Following the general procedures for the synthesis of  $\beta$ -lactams, in an 8-mL scintillation vial open to air, compound **1af** (172.8 mg, 0.5 mmol) was dissolved in HFIP (2.5 mL, 0.2 M). NBS (134.9 mg, 1.5 equiv.) was then added, and the reaction mixture was stirred for 60 min.

After completion, the reaction was concentrated *in vacuo* and purified by column chromatography on silica gel (90:10 Hexanes:EtOAc) to afford *rac* 1-(benzyloxy)-3-bromo-1-azaspiro[3.4]octan-2-one **2af** as a colorless oil (64.6 mg, 41%).

**<sup>1</sup>H NMR (600 MHz, CDCl<sub>3</sub>)**  $\delta$  7.40 – 7.39 (m, 5H), 5.03 (d,  $J$  = 10.9 Hz, 1H), 5.00 (d,  $J$  = 10.9 Hz, 1H), 4.45 (s, 1H), 2.00 – 1.90 (m, 2H), 1.73 – 1.68 (m, 2H), 1.62 – 1.56 (m, 3H), 1.55 – 1.50 (m, 1H).

**<sup>13</sup>C NMR (150 MHz, CDCl<sub>3</sub>)**  $\delta$  161.0, 134.9, 129.8, 129.4, 128.8, 79.2, 76.6, 51.4, 33.3, 31.9, 24.1, 24.0.

**HRMS:** Calculated [M+H]<sup>+</sup> for C<sub>14</sub>H<sub>17</sub>BrNO<sub>2</sub><sup>+</sup>: 310.0437, found: 310.0438.

**FTIR (cm<sup>-1</sup>):** 3032, 2959, 2874, 1775, 1497, 1454, 1369, 1335, 1188, 1049, 950, 907, 848, 743, 696.

### ***rac* 1-(benzyloxy)-3-bromo-1-azaspiro[3.3]heptan-2-one (2ag)**

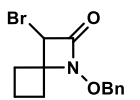

Following the general procedures for the synthesis of  $\beta$ -lactams, in an 8-mL scintillation vial open to air, compound **1ag** (166 mg, 0.5 mmol) was dissolved in HFIP (2.5 mL, 0.2 M). NBS (134.9 mg, 1.5 equiv.) was then added, and the reaction mixture was stirred for 60 min. After completion, the reaction was concentrated *in vacuo* and purified by column chromatography on silica gel (90:10 Hexanes:EtOAc) to afford *rac* 1-(benzyloxy)-3-bromo-1-azaspiro[3.3]heptan-2-one **2ag** as a colorless oil (61 mg, 41%).

**<sup>1</sup>H NMR (600 MHz, CDCl<sub>3</sub>)**  $\delta$  7.43 – 7.38 (m, 5H), 5.03 (m, 2H), 4.46 (s, 1H), 2.35 (dt,  $J$  = 12.5, 9.5 Hz, 1H), 2.30 (ddt,  $J$  = 12.9, 8.6, 4.0 Hz, 1H), 2.03 (ddt,  $J$  = 12.4, 8.5, 3.8 Hz, 1H), 1.92 (dt,  $J$  = 12.9, 9.6 Hz, 1H), 1.67 – 1.61 (m, 1H), 1.57 (dt,  $J$  = 11.3, 8.9 Hz, 1H).

**<sup>13</sup>C NMR (150 MHz, CDCl<sub>3</sub>)**  $\delta$  160.2, 135.0, 129.9, 129.5, 128.8, 79.1, 70.3, 50.5, 29.8, 28.3, 13.2.

**HRMS:** Calculated [M+H]<sup>+</sup> for C<sub>13</sub>H<sub>15</sub>BrNO<sub>2</sub><sup>+</sup>: 296.0281, found: 296.0284.

**FTIR (cm<sup>-1</sup>):** 3064, 3032, 2989, 2945, 2881, 1775, 1455, 1362, 1294, 1212, 1054, 906, 848, 741, 696.

### ***rac* (1*r*,3*r*,5*r*,7*r*)-1'-(benzyloxy)-3'-bromospiro[adamantine-2,2'-azetidin]-4'-one (**2ah**)**

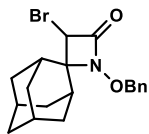

Following the general procedures for the synthesis of  $\beta$ -lactams, in an 8-mL scintillation vial open to air, compound **1ah** (205.8 mg, 0.5 mmol) was dissolved in HFIP (2.5 mL, 0.2 M). NBS (134.9 mg, 1.5 equiv.) was then added, and the reaction mixture was stirred for 60 min. After completion, the reaction was concentrated *in vacuo* and purified by column chromatography on silica gel (90:10 Hexanes:EtOAc) to afford *rac* (1*r*,3*r*,5*r*,7*r*)-1'-(benzyloxy)-3'-bromospiro[adamantine-2,2'-azetidin]-4'-one **2ah** as a white crystalline solid (174.9 mg, 93%).

**<sup>1</sup>H NMR (600 MHz, CDCl<sub>3</sub>)**  $\delta$  7.43 – 7.41 (m, 2H), 7.39 – 7.37 (m, 3H), 5.15 (s, 2H), 4.27 (s, 1H), 2.34 (ddd,  $J$  = 12.8, 3.7, 2.0 Hz, 1H), 2.15 (dd,  $J$  = 13.5, 3.2 Hz, 1H), 2.10 (dq,  $J$  = 6.6, 3.6, 3.5 Hz, 2H), 1.96 – 1.93 (m, 2H), 1.88 (p,  $J$  = 3.2 Hz, 1H), 1.83 (dq,  $J$  = 13.0, 3.0 Hz, 1H), 1.77 (dq,  $J$  = 13.4, 3.1 Hz, 1H), 1.74 – 1.68 (m, 5H).

**<sup>13</sup>C NMR (150 MHz, CDCl<sub>3</sub>)**  $\delta$  161.5, 134.2, 129.7, 129.3, 128.7, 79.4, 76.8, 50.8, 38.4, 37.0, 36.5, 35.4, 34.6, 34.3, 34.2, 26.9, 26.3.

**HRMS:** Calculated [M+H]<sup>+</sup> for C<sub>19</sub>H<sub>23</sub>BrNO<sub>2</sub><sup>+</sup>: 376.0907, found: 376.0911.

**Melting Point:** 42.3 – 51.4 °C

**FTIR (cm<sup>-1</sup>):** 3032, 2906, 2857, 1773, 1498, 1471, 1453, 1375, 1228, 1051, 994, 878, 737, 695.

### ***rac* 1-(benzyloxy)-3-bromo-7-oxa-1-azaspiro[3.5]nonan-2-one (**2ai**)**

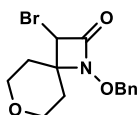

Following the general procedures for the synthesis of  $\beta$ -lactams, in an 8-mL scintillation vial open to air, compound **1ai** (180.8 mg, 0.5 mmol) was dissolved in HFIP (2.5 mL, 0.2 M). NBS (134.9 mg, 1.5 equiv.) was then added, and the reaction mixture was stirred for 60 min. After completion, the reaction was concentrated *in vacuo* and purified by column chromatography on silica gel (90:10 Hexanes:EtOAc) to afford *rac* 1-(benzyloxy)-3-bromo-7-oxa-1-azaspiro[3.5]nonan-2-one **2ai** as a colorless oil (128.2 mg, 79%).

**<sup>1</sup>H NMR (600 MHz, CDCl<sub>3</sub>)**  $\delta$  7.38 (s, 5H), 5.02 (d,  $J$  = 10.9 Hz, 1H), 4.98 (d,  $J$  = 10.9 Hz, 1H), 4.36 (s, 1H), 3.92 – 3.89 (m, 1H), 3.81 (dddd,  $J$  = 12.0, 4.8, 3.8, 1.1 Hz, 1H), 3.53 (ddd,  $J$  = 12.0, 10.5, 3.0 Hz, 1H), 3.44 (ddd,  $J$  = 12.0, 10.8, 2.8 Hz, 1H), 2.08 (ddd,  $J$  = 13.7, 10.8, 4.5 Hz, 1H), 1.74 (dtd,  $J$  = 13.9, 3.2, 3.1, 2.2 Hz, 1H), 1.67 (ddd,  $J$  = 13.8, 10.5, 4.7 Hz, 1H), 1.52 (ddt,  $J$  = 13.7, 3.7, 2.5 Hz, 1H).

**<sup>13</sup>C NMR (150 MHz, CDCl<sub>3</sub>)**  $\delta$  160.8, 134.6, 129.8, 129.5, 128.8, 79.4, 66.5, 66.2, 65.1, 49.6, 34.2, 31.7.

**HRMS:** Calculated [M+H]<sup>+</sup> for C<sub>14</sub>H<sub>17</sub>BrNO<sub>3</sub><sup>+</sup>: 326.0386, found: 326.0389.

**FTIR (cm<sup>-1</sup>):** 3032, 2906, 2857, 1773, 1498, 1471, 1453, 1375, 1228, 1051, 994, 878, 737, 695.

### ***rac* 1-(benzyloxy)-4-bromo-5-phenylpyrrolidin-2-one (**2aj**)**

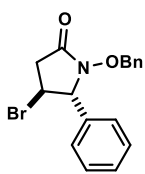

Following the general procedures for the synthesis of  $\beta$ -lactams, in an 8-mL scintillation vial open to air, compound **1aj** (190.8 mg, 0.5 mmol) was dissolved in HFIP (2.5 mL, 0.2 M). NBS (134.9 mg, 1.5 equiv.) was then added, and the reaction mixture was stirred for 60 min. After completion, the reaction was concentrated *in vacuo* and purified by column chromatography on silica gel (90:10 Hexanes:EtOAc) to afford *rac* 1-(benzyloxy)-4-bromo-5-phenylpyrrolidin-2-one **2aj** as a colorless crystal (117.7 mg, 68%).

**<sup>1</sup>H NMR (600 MHz, CDCl<sub>3</sub>)** δ 7.41 – 7.38 (m, 3H), 7.34 – 7.30 (m, 3H), 7.28 – 7.26 (m, 2H), 7.24 – 7.22 (m, 2H), 5.05 (d, *J* = 10.6 Hz, 1H), 4.85 (d, *J* = 10.6 Hz, 1H), 4.65 (d, 4.2 Hz, 1H), 4.15 (dt, *J* = 7.6, 4.5 Hz, 1H), 3.14 (dd, *J* = 17.9, 7.7 Hz, 1H), 2.78 (dd, *J* = 17.9, 4.7 Hz, 1H).

**<sup>13</sup>C NMR (150 MHz, CDCl<sub>3</sub>)** δ 168.4, 136.1, 134.7, 129.8, 129.3, 129.1, 128.7, 126.9, 77.8, 72.0, 42.4, 38.5.

**HRMS:** Calculated [M+H]<sup>+</sup> for C<sub>17</sub>H<sub>17</sub>BrNO<sub>2</sub><sup>+</sup>: 346.0437, found: 346.0441.

**FTIR (cm<sup>-1</sup>):** 3058, 3034, 2956, 2892, 1681, 1453, 1367, 1267, 1160, 1030, 974, 841, 759.

### ***rac* 1-(benzyloxy)-5-(bromoethyl)-5-methylpyrrolidin-2-one (2ak)**

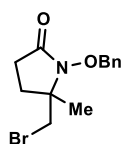

Following the general procedures for the synthesis of β-lactams, in an 8-mL scintillation vial open to air, compound **1ak** (166.8 mg, 0.5 mmol) was dissolved in HFIP (2.5 mL, 0.2 M). NBS (134.9 mg, 1.5 equiv.) was then added, and the reaction mixture was stirred for 60 min. After completion, the reaction was concentrated *in vacuo* and purified by column chromatography on silica gel (70:30 Hexanes:EtOAc) to afford *rac* 1-(benzyloxy)-5-(bromoethyl)-5-methylpyrrolidin-2-one **2ak** as a colorless oil (142.1 mg, 95%).

**<sup>1</sup>H NMR (600 MHz, CDCl<sub>3</sub>)** δ 7.46 – 7.40 (m, 2H), 7.39 – 7.34 (m, 3H), 5.12 (s, 2H), 3.50 (d, *J* = 10.8 Hz, 1H), 3.38 (d, *J* = 10.8 Hz, 1H), 2.47 (ddd, *J* = 17.4, 10.4, 6.0 Hz, 1H), 2.35 (ddd, *J* = 17.4, 10.4, 5.5 Hz, 1H), 2.22 (ddd, *J* = 13.1, 10.4, 5.5 Hz, 1H), 1.84 (ddd, *J* = 13.1, 10.4, 5.9 Hz, 1H), 1.35 (s, 3H).

**<sup>13</sup>C NMR (150 MHz, CDCl<sub>3</sub>)** δ 171.7, 135.3, 129.7, 129.0, 128.7, 78.6, 63.1, 39.0, 27.78, 26.5, 23.0.

**HRMS:** Calculated [M+H]<sup>+</sup> for C<sub>13</sub>H<sub>17</sub>BrNO<sub>2</sub><sup>+</sup>: 298.0437, found: 298.0445.

**FTIR (cm<sup>-1</sup>):** 3063, 3032, 2973, 2886, 1704, 1454, 1376, 1249, 1058, 912, 752, 716, 695.

### ***rac* 1-(benzyloxy)-6-(bromoethyl)-6-phenylpiperidin-2-one (2al)**

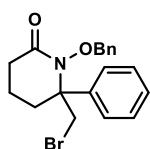

Following the general procedures for the synthesis of β-lactams, in an 8-mL scintillation vial open to air, compound **1al** (42 mg, 0.1 mmol) was dissolved in HFIP (0.5 mL, 0.2 M). NBS (27.4 mg, 1.5 equiv.) was then added, and the reaction mixture was stirred for 60 min. After completion, the reaction was concentrated *in vacuo* and purified by column chromatography on silica gel (70:30 Hexanes:EtOAc) to afford *rac* 1-(benzyloxy)-6-(bromoethyl)-6-phenylpiperidin-2-one **2al** as a white crystalline solid (28.2 mg, 73%).

**<sup>1</sup>H NMR (600 MHz, CDCl<sub>3</sub>)** δ 7.44 – 7.43 (m, 2H), 7.36 – 7.27 (m, 8H), 5.40 (d, *J* = 9.4 Hz, 1H), 5.16 (d, *J* = 9.4 Hz, 1H), 4.18 (d, *J* = 11.3 Hz, 1H), 3.95 (d, *J* = 11.3 Hz, 1H), 2.72 (td, *J* = 13.4, 3.4 Hz, 1H), 2.63 (ddd, *J* = 17.0, 12.5, 6.6 Hz, 1H), 2.51 (ddt, *J* = 17.0, 5.5, 2.3 Hz, 1H), 2.13 (dddd, *J* = 13.5, 4.1, 3.2, 2.2 Hz, 1H), 1.68 – 1.63 (m, 1H), 1.43 – 1.35 (m, 1H).

**<sup>13</sup>C NMR (150 MHz, CDCl<sub>3</sub>)** δ 171.5, 141.0, 135.7, 129.4, 129.0, 128.5, 128.5, 128.1, 126.8, 77.7, 72.3, 38.8, 36.1, 33.7, 17.0.

**HRMS:** Calculated [M+H]<sup>+</sup> for C<sub>19</sub>H<sub>21</sub>BrNO<sub>2</sub><sup>+</sup>: 374.0750, found: 374.0754.

**FTIR (cm<sup>-1</sup>):** 3030, 2957, 1678, 1496, 1446, 1356, 1331, 1207, 1048, 974, 750.

### ***rac* 1-(benzyloxy)-7-(bromoethyl)-7-phenylazepan-2-one (2am)**

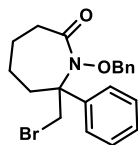

Following the general procedures for the synthesis of  $\beta$ -lactams, in an 8-mL scintillation vial open to air, compound **1am** (119 mg, 0.3 mmol) was dissolved in HFIP (0.5 mL, 0.2 M). NBS (75 mg, 1.5 equiv.) was then added, and the reaction mixture was stirred for 60 min. After completion, the reaction was concentrated *in vacuo* and purified by column chromatography on silica gel (DCM as the sole eluent) to afford *rac* 1-(benzyloxy)-7-(bromoethyl)-7-phenylazepan-2-one **2am** as a colorless oil (33.1 mg, 31%).

**<sup>1</sup>H NMR (600 MHz, CDCl<sub>3</sub>)**  $\delta$  7.54 – 7.52 (m, 2H), 7.37 – 7.33 (m, 5H), 7.30 – 7.27 (m, 3H), 5.35 (d, *J* = 8.9 Hz, 1H), 5.24 (d, *J* = 8.9 Hz, 1H), 4.20 (d, *J* = 10.8 Hz, 1H), 3.62 (d, *J* = 10.8 Hz, 1H), 2.60 – 2.56 (m, 2H), 2.48 (dt, *J* = 15.5, 3.8 Hz, 1H), 1.98 (ddd, *J* = 15.6, 9.4, 3.8 Hz, 1H), 1.87 (dtd, *J* = 12.2, 9.0, 7.7, 4.7 Hz, 1H), 1.65 – 1.59 (m, 4H).

**<sup>13</sup>C NMR (150 MHz, CDCl<sub>3</sub>)**  $\delta$  176.3, 141.2, 135.8, 129.6, 129.1, 128.6, 128.5, 128.1, 126.9, 78.0, 71.7, 43.2, 37.1, 36.5, 23.6, 22.0.

**HRMS:** Calculated [M+H]<sup>+</sup> for C<sub>20</sub>H<sub>23</sub>BrNO<sub>2</sub><sup>+</sup>: 388.0907, found: 388.0912.

**FTIR (cm<sup>-1</sup>):** 3062, 3032, 2936, 2865, 1666, 1497, 1447, 1313, 1215, 1015, 909, 763, 742.

## **11. Synthesis and characterization of silyl imino ethers (1):**

### ***tert*butyl dimethylsilyl (*Z*)-*N*-methoxycinnanimidate (1a)**

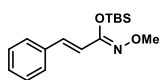

Following the general procedures for the synthesis of silyl imino ethers, in a flame-dried round bottom flask under Argon atmosphere, compound **12a** (695 mg, 3.92 mmol, 1.0 equiv.) was dissolved in dry THF (20 mL, 0.2 M) at room temperature. The reaction mixture was then cooled down to –78 °C using an acetone-dry ice bath. A solution of KHMDS (5.1 mL, 1.2 equiv., 1.0 M in THF) was then added slowly. TBSCl (706 mg, 1.2 equiv.) was then added, and the reaction was allowed to warm to room temperature. The reaction was left stirring for 60 min until full conversion was overserved by TLC. The reaction mixture was then partitioned with 20 mL of H<sub>2</sub>O and extracted with 30 mL of EtOAc three times. The combined organic layers were dried over Na<sub>2</sub>SO<sub>4</sub> and concentrated *in vacuo*. The reaction crude was then purified by column chromatography on silica gel (93:7 hexanes:EtOAc) to afford *tert*butyl dimethylsilyl (*Z*)-*N*-methoxycinnanimidate **1a** as a colorless oil (646 mg, 60%).

**<sup>1</sup>H NMR (600 MHz, CDCl<sub>3</sub>)**  $\delta$  7.44 – 7.42 (m, 2H), 7.35 – 7.33 (m, 2H), 7.30 – 7.27 (m, 1H), 7.13 (d, *J* = 16.0 Hz, 1H), 6.53 (d, *J* = 16.0 Hz, 1H), 3.83 (s, 3H), 1.02 (s, 9H), 0.25 (s, 6H).

**<sup>13</sup>C NMR (150 MHz, CDCl<sub>3</sub>)**  $\delta$  152.9, 136.0, 134.3, 128.9, 128.7, 1272.2, 120.3, 61.2, 26.1, 19.1, -3.7.

**HRMS:** Calculated [M+H]<sup>+</sup> for C<sub>16</sub>H<sub>26</sub>NO<sub>2</sub>Si<sup>+</sup>: 292.1727, found: 292.1735.

**FTIR (cm<sup>-1</sup>):** 3061, 6027, 2956, 2931, 2898, 2858, 1581, 1471, 1463, 1449, 1346, 1251, 1062, 1018, 921, 823, 784, 752, 690.

### ***tert*butyl dimethylsilyl (*Z*)-*N*-(benzyloxy)cinnanimidate (1b)**

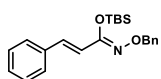

Following the general procedures for the synthesis of silyl imino ethers, in a flame-dried round bottom flask under Argon atmosphere, compound **12b** (12.55 g, 49.54 mmol, 1.0 equiv.) was dissolved in dry THF (250 mL, 0.2 M) at room temperature. The reaction

mixture was then cooled down to  $-78\text{ }^{\circ}\text{C}$  using an acetone-dry ice bath. A solution of KHMDS (64.5 mL, 1.2 equiv., 1.0 M in THF) was then added slowly. TBSCl (9.6 g, 1.2 equiv.) was then added, and the reaction was allowed to warm to room temperature. The reaction was left stirring for 60 min until full conversion was overserved by TLC. The reaction mixture was then partitioned with 200 mL of  $\text{H}_2\text{O}$  and extracted with 250 mL of EtOAc three times. The combined organic layers were dried over  $\text{Na}_2\text{SO}_4$  and concentrated *in vacuo*. The reaction crude was then purified by column chromatography on silica gel (93:7 hexanes:EtOAc) to afford *tertbutyl dimethylsilyl (Z)-N-(benzyloxy)cinnamimidate 1b* as a crystalline white solid (13.38 g, 74%).

$^1\text{H NMR}$  (600 MHz,  $\text{CDCl}_3$ )  $\delta$  7.44 – 7.40 (m, 4H), 7.38 – 7.31 (m, 5H), 7.29 – 7.26 (m, 1H), 7.13 (d,  $J = 16.0$  Hz, 1H), 6.54 (d,  $J = 16.0$  Hz, 1H), 5.04 (s, 2H), 0.98 (s, 9H), 0.16 (s, 6H).

$^{13}\text{C NMR}$  (150 MHz,  $\text{CDCl}_3$ )  $\delta$  152.8, 137.1, 136.1, 134.2, 129.0, 129.0, 128.9, 128.6, 128.5, 128.2, 127.2, 120.6, 76.3, 26.1, 19.1, -3.6.

HRMS: Calculated  $[\text{M}+\text{H}]^+$  for  $\text{C}_{22}\text{H}_{30}\text{NO}_2\text{Si}^+$ : 368.2040, found: 368.2049.

Melting Point: 58.1 – 61.4  $^{\circ}\text{C}$

FTIR ( $\text{cm}^{-1}$ ): 3085, 3063, 3031, 2959, 2949, 2879, 2857, 1577, 1448, 1360, 1346, 1250, 1054, 1009, 1000, 964, 783, 750, 738, 689.

#### ***tertbutyl dimethylsilyl (Z)-N-((4-methoxybenzyloxy)oxy)cinnamimidate (1c)***

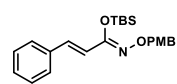

Following the general procedures for the synthesis of silyl imino ethers, in a flame-dried round bottom flask under Argon atmosphere, compound **12c** (2.0 g, 7.06 mmol, 1.0 equiv.) was dissolved in dry THF (35 mL, 0.2 M) at room temperature. The reaction mixture was then cooled down to  $-78\text{ }^{\circ}\text{C}$  using an acetone-dry ice bath. A solution of KHMDS (7.8 mL, 1.2 equiv., 1.0 M in THF) was then added slowly. TBSCl (1.20 g, 1.2 equiv.) was then added, and the reaction was allowed to warm to room temperature. The reaction was left stirring for 60 min until full conversion was overserved by TLC. The reaction mixture was then partitioned with 40 mL of  $\text{H}_2\text{O}$  and extracted with 50 mL of EtOAc three times. The combined organic layers were dried over  $\text{Na}_2\text{SO}_4$  and concentrated *in vacuo*. The reaction crude was then purified by column chromatography on silica gel (93:7 hexanes:EtOAc) to afford *tertbutyl dimethylsilyl (Z)-N-((4-methoxybenzyloxy)oxy)cinnamimidate 1c* as a white solid (1.88 g, 67%).

$^1\text{H NMR}$  (600 MHz,  $\text{CDCl}_3$ )  $\delta$  7.44 – 7.42 (m, 2H), 7.35 – 7.32 (4H), 7.29 – 7.26 (m, 1H), 7.12 (d,  $J = 16.0$  Hz, 1H), 6.89 (d,  $J = 8.8$  Hz, 2H), 6.53 (d,  $J = 16.0$  Hz, 1H), 4.97 (s, 2H), 3.82 (s, 3H), 0.97 (s, 9H), 0.13 (s, 6H).

$^{13}\text{C NMR}$  (150 MHz,  $\text{CDCl}_3$ )  $\delta$  159.7, 152.7, 136.1, 134.1, 130.8, 129.2, 128.9, 128.6, 127.2, 120.6, 113.8, 76.0, 55.4, 26.1, 26.1, 19.1, .01, -3.6.

HRMS: Calculated  $[\text{M}+\text{H}]^+$  for  $\text{C}_{23}\text{H}_{32}\text{NO}_3\text{Si}^+$ : 398.2146, found: 398.2153.

Melting Point: 82.0 – 85.0  $^{\circ}\text{C}$

FTIR ( $\text{cm}^{-1}$ ): 3031, 2929, 2885, 2857, 1611, 1588, 1514, 1377, 1347, 1249, 1174, 1051, 1031, 999, 969, 825, 786, 751, 692.

### **tertbutyl dimethylsilyl (Z)-N-((tert-butyldimethylsilyl)oxy)cinnamimidate (1d)**

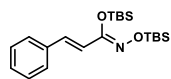

Following the general procedures for the synthesis of silyl imino ethers, in a flame-dried round bottom flask under Argon atmosphere, compound **1d** (3.73 g, 22.88 mmol, 1.0 equiv.) was dissolved in dry THF (115 mL, 0.2 M) at room temperature. The reaction mixture was then cooled down to  $-78\text{ }^{\circ}\text{C}$  using an acetone-dry ice bath. A solution of KHMDS (47 mL, 2.05 equiv., 1.0 M in THF) was then added slowly. TBSCl (7.213 g, 2.1 equiv.) was then added, and the reaction was allowed to warm to room temperature. The reaction was left stirring for 30 min until full conversion was overserved by TLC. The reaction mixture was then partitioned with 100 mL of  $\text{H}_2\text{O}$  and extracted with 100 mL of EtOAc three times. The combined organic layers were dried over  $\text{Na}_2\text{SO}_4$  and concentrated *in vacuo*. The reaction crude was then purified by column chromatography on silica gel (93:7 hexanes:EtOAc) to afford *tertbutyl dimethylsilyl (Z)-N-((tert-butyldimethylsilyl)oxy)cinnamimidate* **1d** as a yellow oil (3.209 g, 36%).

$^1\text{H NMR}$  (600 MHz,  $\text{CDCl}_3$ )  $\delta$  7.46 – 7.44 (m, 2H), 7.35 – 7.32 (m, 2H), 7.28 – 7.26 (m, 1H), 7.12 (d,  $J = 16.1$  Hz, 1H), 6.54 (d,  $J = 16.1$  Hz, 1H), 1.02 (s, 9H), 0.97 (s, 9H), 0.28 (s, 6H), 0.20 (s, 6H).

$^{13}\text{C NMR}$  (150 MHz,  $\text{CDCl}_3$ )  $\delta$  154.9, 136.3, 133.7, 128.8, 128.8, 128.8, 128.5, 127.8, 127.2, 121.5, 26.5, 26.1, -3.3, -4.9.

**HRMS:** Calculated  $[\text{M}+\text{H}]^+$  for  $\text{C}_{21}\text{H}_{38}\text{NO}_2\text{Si}_2^+$ : 392.2436, found: 392.2444.

**FTIR** ( $\text{cm}^{-1}$ ): 3028, 2955, 2929, 2885, 2857, 1582, 1347, 1250, 1038, 958, 871, 836, 780, 753, 690.

### **tertbutyl dimethylsilyl (Z)-N-phenoxy-cinnamimidate (1e)**

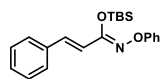

Following the general procedures for the synthesis of silyl imino ethers, in a flame-dried round bottom flask under Argon atmosphere, compound **1e** (1.0 g, 4.18 mmol, 1.0 equiv.) was dissolved in dry THF (21 mL, 0.2 M) at room temperature. The reaction mixture was then cooled down to  $-78\text{ }^{\circ}\text{C}$  using an acetone-dry ice bath. A solution of KHMDS (5.0 mL, 1.2 equiv., 1.0 M in THF) was then added slowly. TBSCl (753 mg, 1.2 equiv.) was then added, and the reaction was allowed to warm to room temperature. The reaction was left stirring for 60 min until full conversion was overserved by TLC. The reaction mixture was then partitioned with 20 mL of  $\text{H}_2\text{O}$  and extracted with 25 mL of EtOAc three times. The combined organic layers were dried over  $\text{Na}_2\text{SO}_4$  and concentrated *in vacuo*. The reaction crude was then purified by column chromatography on silica gel (93:7 hexanes:EtOAc) to afford *tertbutyl dimethylsilyl (Z)-N-phenoxy-cinnamimidate* **1e** as a white solid (1.102 g, 75%).

$^1\text{H NMR}$  (600 MHz,  $\text{CDCl}_3$ )  $\delta$  7.50 – 7.48 (m, 2H), 7.39 – 7.37 (m, 2H), 7.34 – 7.30 (m, 3H), 7.27 – 7.23 (m, 3H), 7.03 (tt,  $J = 7.3, 1.1$  Hz, 1H), 6.68 (d,  $J = 16.0$  Hz, 1H), 1.07 (s, 9H), 0.36 (s, 6H).

$^{13}\text{C NMR}$  (150 MHz,  $\text{CDCl}_3$ )  $\delta$  159.0, 155.0, 135.8, 129.5, 129.0, 129.0, 127.4, 122.3, 120.1, 114.8, 26.1, 19.1, -3.6.

**HRMS:** Calculated  $[\text{M}+\text{H}]^+$  for  $\text{C}_{21}\text{H}_{28}\text{NO}_2\text{Si}^+$ : 354.1884, found: 384.1890.

**Melting Point:** 59.4 – 62.9  $^{\circ}\text{C}$

**FTIR** ( $\text{cm}^{-1}$ ): 3059, 3027, 2958, 2927, 2854, 1593, 1578, 1488, 1349, 1250, 1209, 1034, 1022, 959, 806, 787, 752, 688.

### **tertbutyl dimethylsilyl (1Z,2E)-N-(benzyloxy)-3-(naphthalen-2-yl)acrylamidate (1f)**

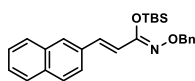

Following the general procedures for the synthesis of silyl imino ethers, in a flame-dried round bottom flask under Argon atmosphere, compound **12f** (1.0 g, 3.3 mmol, 1.0 equiv.) was dissolved in dry THF (17 mL, 0.2 M) at room temperature. The reaction mixture was then cooled down to  $-78\text{ }^{\circ}\text{C}$  using an acetone-dry ice bath. A solution of KHMDS (4.3 mL, 1.2 equiv., 1.0 M in THF) was then added slowly. TBSCl (646 mg, 1.2 equiv.) was then added, and the reaction was allowed to warm to room temperature. The reaction was left stirring for 60 min until full conversion was overserved by TLC. The reaction mixture was then partitioned with 20 mL of  $\text{H}_2\text{O}$  and extracted with 20 mL of EtOAc three times. The combined organic layers were dried over  $\text{Na}_2\text{SO}_4$  and concentrated *in vacuo*. The reaction crude was then purified by column chromatography on silica gel (93:7 hexanes:EtOAc) to afford *tertbutyl* dimethylsilyl (1Z,2E)-N-(benzyloxy)-3-(naphthalen-2-yl)acrylamidate **1f** as a white solid (1.035 g, 75%).

**$^1\text{H}$  NMR (600 MHz,  $\text{CDCl}_3$ )**  $\delta$  7.82 – 7.78 (m, 4H), 7.62 (dd,  $J = 8.6, 1.9$  Hz, 1H), 7.49 – 7.44 (m, 2H), 7.43 – 7.42 (m, 2H), 7.39 – 7.36 (m, 2H), 7.34 – 7.31 (m, 1H), 7.28 (d,  $J = 16.0$  Hz, 1H), 6.66 (d,  $J = 15.9$  Hz, 1H), 5.06 (s, 2H), 1.02 (s, 9H), 0.18 (s, 6H).

**$^{13}\text{C}$  NMR (150 MHz,  $\text{CDCl}_3$ )**  $\delta$  152.9, 137.1, 134.2, 133.6, 133.6, 133.5, 139.1, 128.6, 125.8, 128.3, 128.2, 127.9, 127.8, 126.6, 126.5, 123.6, 120.9, 76.3, 26.1, 19.1, -3.6.

**HRMS:** Calculated  $[\text{M}+\text{H}]^+$  for  $\text{C}_{26}\text{H}_{32}\text{NO}_2\text{Si}^+$ : 418.2197, found: 418.2201.

**Melting Point:** 79.4 – 82.8  $^{\circ}\text{C}$

**FTIR ( $\text{cm}^{-1}$ ):** 3057, 3034, 2956, 2927, 2879, 1580, 1468, 1461, 1364, 1321, 1247, 1054, 1008, 958, 836, 811, 746, 696.

### **tertbutyl dimethylsilyl (1Z,2E)-N-(benzyloxy)-3-(naphthalen-1-yl)acrylamidate (1g)**

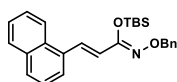

Following the general procedures for the synthesis of silyl imino ethers, in a flame-dried round bottom flask under Argon atmosphere, compound **12g** (303.4 mg, 1.0 mmol, 1.0 equiv.) was dissolved in dry THF (5 mL, 0.2 M) at room temperature. The reaction mixture was then cooled down to  $-78\text{ }^{\circ}\text{C}$  using an acetone-dry ice bath. A solution of KHMDS (1.2 mL, 1.2 equiv., 1.0 M in THF) was then added slowly. TBSCl (180 mg, 1.2 equiv.) was then added, and the reaction was allowed to warm to room temperature. The reaction was left stirring for 60 min until full conversion was overserved by TLC. The reaction mixture was then partitioned with 5 mL of  $\text{H}_2\text{O}$  and extracted with 10 mL of EtOAc three times. The combined organic layers were dried over  $\text{Na}_2\text{SO}_4$  and concentrated *in vacuo*. The reaction crude was then purified by column chromatography on silica gel (93:7 hexanes:EtOAc) to afford *tertbutyl* dimethylsilyl (1Z,2E)-N-(benzyloxy)-3-(naphthalen-1-yl)acrylamidate **1g** as a colorless oil (324 mg, 69%).

**$^1\text{H}$  NMR (600 MHz,  $\text{CDCl}_3$ )**  $\delta$  8.12 – 8.10 (m, 1H), 7.94 (d,  $J = 15.7$  Hz, 1H), 7.78 – 7.85 (m, 1H), 7.81 (d,  $J = 8.1$  Hz, 1H), 7.70 (dt,  $J = 7.3, 1.0$  Hz, 1H), 7.55 – 7.49 (m, 2H), 7.47 – 7.45 (m, 1H), 7.44 – 7.42 (m, 2H), 7.38 (tt,  $J = 6.5, 1.0$  Hz, 2H), 7.35 – 7.32 (m, 1H), 6.63 (d,  $J = 15.7$  Hz, 1H), 5.07 (s, 2H), 1.05 (s, 9H), 0.21 (s, 6H).

**$^{13}\text{C}$  NMR (150 MHz,  $\text{CDCl}_3$ )**  $\delta$  152.8, 137.1, 133.9, 133.5, 131.4, 131.0, 129.1, 129.0, 128.8, 128.5, 128.2, 126.5, 126.0, 125.8, 124.1, 123.5, 123.1, 76.4, 26.2, 19.1, -3.5.

**HRMS:** Calculated  $[\text{M}+\text{H}]^+$  for  $\text{C}_{26}\text{H}_{32}\text{NO}_2\text{Si}^+$ : 418.2197, found: 418.2201.



FTIR (cm<sup>-1</sup>): 3061, 3034, 2954, 229, 2857, 1582, 1362, 1350, 1329, 1251, 1053, 1001, 959, 786, 770, 696.

### **tertbutyl dimethylsilyl (1Z,2Z)-N-(benzyloxy)-2-bromo-3-phenylacrylamide (1j)**

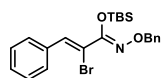

Following the general procedures for the synthesis of silyl imino ethers, in a flame-dried round bottom flask under Argon atmosphere, compound **12j** (1.33 g, 4.0 mmol, 1.0 equiv.) was dissolved in dry THF (40 mL, 0.2 M) at room temperature. The reaction mixture was then cooled down to -78 °C using an acetone-dry ice bath. A solution of KHMDS (4.8 mL, 1.2 equiv., 1.0 M in THF) was then added slowly. TBSCl (721 mg, 1.2 equiv.) was then added, and the reaction was allowed to warm to room temperature. The reaction was left stirring for 60 min until full conversion was overserved by TLC. The reaction mixture was then partitioned with 40 mL of H<sub>2</sub>O and extracted with 50 mL of EtOAc three times. The combined organic layers were dried over Na<sub>2</sub>SO<sub>4</sub> and concentrated *in vacuo*. The reaction crude was then purified by column chromatography on silica gel (93:7 hexanes:EtOAc) to afford *tertbutyl* dimethylsilyl (1Z,2Z)-N-(benzyloxy)-2-bromo-3-phenylacrylamide **1j** as a pale-yellow oil (1.130 g, 64%).

<sup>1</sup>H NMR (600 MHz, CDCl<sub>3</sub>) δ 7.71 – 7.70 (m, 2H), 7.66 (s, 1H), 7.45 – 7.43 (m, 2H), 7.40 – 7.32 (m, 6H), 5.10 (s, 2H), 0.95 (s, 9H), 0.14 (s, 6H).

<sup>13</sup>C NMR (150 MHz, CDCl<sub>3</sub>) δ 150.3, 136.7, 135.0, 133.2, 129.9, 129.5, 128.9, 128.5, 128.4, 128.4, 114.3, 26.0, -3.5.

HRMS: Calculated [M+H]<sup>+</sup> for C<sub>22</sub>H<sub>29</sub>BrNO<sub>2</sub>Si<sup>+</sup>: 446.1145, found: 446.1145.

FTIR (cm<sup>-1</sup>): 3064, 3033, 2954, 2930, 2858, 1580, 1339, 1253, 1197, 1049, 991, 809, 786, 754, 688.

### **tertbutyl dimethylsilyl (1Z,2Z)-N-(benzyloxy)-2-chloro-3-phenylacrylamide (1k)**

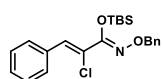

Following the general procedures for the synthesis of silyl imino ethers, in a flame-dried round bottom flask under Argon atmosphere, compound **12k** (575.5 mg, 2.0 mmol, 1.0 equiv.) was dissolved in dry THF (10 mL, 0.2 M) at room temperature. The reaction mixture was then cooled down to -78 °C using an acetone-dry ice bath. A solution of KHMDS (2.6 mL, 1.2 equiv., 1.0 M in THF) was then added slowly. TBSCl (390 mg, 1.2 equiv.) was then added, and the reaction was allowed to warm to room temperature. The reaction was left stirring for 60 min until full conversion was overserved by TLC. The reaction mixture was then partitioned with 10 mL of H<sub>2</sub>O and extracted with 20 mL of EtOAc three times. The combined organic layers were dried over Na<sub>2</sub>SO<sub>4</sub> and concentrated *in vacuo*. The reaction crude was then purified by column chromatography on silica gel (93:7 hexanes:EtOAc) to afford *tertbutyl* dimethylsilyl (1Z,2Z)-N-(benzyloxy)-2-chloro-3-phenylacrylamide **1k** as a pale-yellow solid (344 mg, 43%).

<sup>1</sup>H NMR (600 MHz, CDCl<sub>3</sub>) δ 7.71 (ddd, *J* = 8.5, 1.3, 0.6 Hz, 2H), 7.44 – 7.42 (m, 2H), 7.41 – 7.32 (m, 7H), 5.11 (s, 2H), 0.96 (s, 9H), 0.14 (s, 6H).

<sup>13</sup>C NMR (150 MHz, CDCl<sub>3</sub>) δ 150.1, 136.7, 134.2, 130.1, 129.6, 129.5, 128.9, 128.5, 128.4, 123.7, 26.0, 19.0, -3.6.

HRMS: Calculated [M+H]<sup>+</sup> for C<sub>22</sub>H<sub>29</sub>ClNO<sub>2</sub>Si<sup>+</sup>: 402.1651, found: 402.1659.

Melting Point: 65.5 – 68.7 °C

**FTIR (cm<sup>-1</sup>):** 3093, 3071, 3054, 2938, 2928, 2855, 1587, 1491, 1467, 1446, 1318, 1252, 1078, 1067, 1014, 973, 793, 744, 688.

**tertbutyl dimethylsilyl (1Z,2E)-N-(benzyloxy)-2-methyl-3-phenylacrylimidate (1l)**

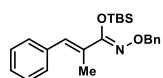

Following the general procedures for the synthesis of silyl imino ethers, in a flame-dried round bottom flask under Argon atmosphere, compound **12l** (575.5 mg, 2.0 mmol, 1.0 equiv.) was dissolved in dry THF (10 mL, 0.2 M) at room temperature. The reaction mixture was then cooled down to  $-78$  °C using an acetone-dry ice bath. A solution of KHMDS (2.6 mL, 1.2 equiv., 1.0 M in THF) was then added slowly. TBSCl (390 mg, 1.2 equiv.) was then added, and the reaction was allowed to warm to room temperature. The reaction was left stirring for 60 min until full conversion was overserved by TLC. The reaction mixture was then partitioned with 10 mL of H<sub>2</sub>O and extracted with 20 mL of EtOAc three times. The combined organic layers were dried over Na<sub>2</sub>SO<sub>4</sub> and concentrated *in vacuo*. The reaction crude was then purified by column chromatography on silica gel (93:7 hexanes:EtOAc) to afford *tertbutyl* dimethylsilyl (1Z,2E)-N-(benzyloxy)-2-methyl-3-phenylacrylimidate **1l** as a white pale-yellow solid (344 mg, 43%).

**<sup>1</sup>H NMR (600 MHz, CDCl<sub>3</sub>)**  $\delta$  7.43 – 7.42 (m, 2H), 7.37 – 7.34 (m, 4H), 7.33 – 7.31 (m, 3H), 7.26 – 7.24 (m, 1H), 7.23 (s, 1H), 5.04 (s, 2H), 2.06 (d,  $J$  = 1.3 Hz, 3H), 0.96 (s, 9H), 0.13 (s, 6H).

**<sup>13</sup>C NMR (150 MHz, CDCl<sub>3</sub>)**  $\delta$  153.6, 137.4, 137.3, 130.8, 129.9, 129.5, 129.3, 128.4, 128.3, 128.1, 127.2, 76.3, 26.1, 19.1, 14.1, -3.5.

**HRMS:** Calculated  $[M+H]^+$  for C<sub>23</sub>H<sub>32</sub>NO<sub>2</sub>Si<sup>+</sup>: 382.2197, found: 382.2209.

**Melting Point:** 45.1 – 46.7 °C

**FTIR (cm<sup>-1</sup>):** 3066, 3030, 2958, 2929, 2856, 1586, 1466, 1361, 1246, 1129, 1050, 960, 837, 785, 748, 694.

**tertbutyl dimethylsilyl (Z)-2-((E)-benzylidene)-N-(benzyloxy)pentanimidate (1m)**

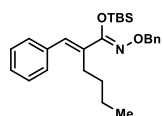

Following the general procedures for the synthesis of silyl imino ethers, in a flame-dried round bottom flask under Argon atmosphere, compound **12m** (773.5 mg, 2.5 mmol, 1.0 equiv.) was dissolved in dry THF (12.5 mL, 0.2 M) at room temperature. The reaction mixture was then cooled down to  $-78$  °C using an acetone-dry ice bath. A solution of KHMDS (3.0 mL, 1.2 equiv., 1.0 M in THF) was then added slowly. TBSCl (450 mg, 1.2 equiv.) was then added, and the reaction was allowed to warm to room temperature. The reaction was left stirring for 60 min until full conversion was overserved by TLC. The reaction mixture was then partitioned with 15 mL of H<sub>2</sub>O and extracted with 20 mL of EtOAc three times. The combined organic layers were dried over Na<sub>2</sub>SO<sub>4</sub> and concentrated *in vacuo*. The reaction crude was then purified by column chromatography on silica gel (93:7 hexanes:EtOAc) to afford *tertbutyl* dimethylsilyl (Z)-2-((E)-benzylidene)-N-(benzyloxy)pentanimidate **1m** as a colorless oil (568 mg, 54%).

**<sup>1</sup>H NMR (600 MHz, CDCl<sub>3</sub>)**  $\delta$  7.43 – 7.41 (m, 2H), 7.36 – 7.33 (m, 4H), 7.33 – 7.30 (m, 1H), 7.29 – 7.27 (m, 2H), 7.26 – 7.24 (m, 1H), 5.02 (s, 2H), 2.48 – 2.46 (m, 2H), 1.53 – 1.48 (m, 2H), 1.35 (h,  $J$  = 7.4 Hz, 2H), 0.95 (s, 9H), 0.88 (t,  $J$  = 7.4 Hz, 3H), 0.15 (s, 6H).

**<sup>13</sup>C NMR (150 MHz, CDCl<sub>3</sub>)**  $\delta$  152.5, 137.7, 137.3, 135.3, 130.5, 129.4, 129.1, 128.4, 128.3, 128.0, 127.2, 76.2, 31.8, 27.2, 26.1, 23.1, 19.1, 14.0, -3.6.

**HRMS:** Calculated  $[M+H]^+$  for  $C_{26}H_{38}NO_2Si^+$ : 424.2666, found: 424.2675.

**FTIR ( $cm^{-1}$ ):** 3063, 3030, 2955, 2929, 2858, 1585, 1470, 1455, 1362, 1333, 1276, 1251, 1060, 1021, 993, 823, 784, 695.

#### **tertbutyl dimethylsilyl (1Z,2E)-N-(benzyloxy)-3-phenyl-2-(pyridin-3-yl)acrylimidate (1n)**

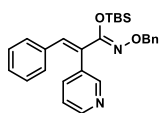

Following the general procedures for the synthesis of silyl imino ethers, in a flame-dried round bottom flask under Argon atmosphere, compound **12n** (120 mg, 0.36 mmol, 1.0 equiv.) was dissolved in dry THF (4 mL, 0.2 M) at room temperature. The reaction mixture was then cooled down to  $-78\text{ }^\circ\text{C}$  using an acetone-dry ice bath. A solution of KHMDS (0.43 mL, 1.2 equiv., 1.0 M in THF) was then added slowly. TBSCl (61 mg, 1.2 equiv.) was then added, and the reaction was allowed to warm to room temperature. The reaction was left stirring for 60 min until full conversion was overserved by TLC. The reaction mixture was then partitioned with 5 mL of  $H_2O$  and extracted with 10 mL of EtOAc three times. The combined organic layers were dried over  $Na_2SO_4$  and concentrated *in vacuo*. The reaction crude was then purified by column chromatography on silica gel (93:7 hexanes:EtOAc) to afford *tertbutyl* dimethylsilyl (1Z,2E)-N-(benzyloxy)-3-phenyl-2-(pyridin-3-yl)acrylimidate **1n** as a colorless oil (94 mg, 58%).

**$^1H$  NMR (600 MHz,  $CDCl_3$ )**  $\delta$  8.55 (m, 1H), 8.40 (s, 1H), 7.47 (dt,  $J = 7.8, 1.9$  Hz, 1H), 7.40 (s, 1H), 7.34 – 7.30 (m, 3H), 7.28 – 7.26 (m, 2H), 7.24 – 7.22 (m, 1H), 7.14 – 7.12 (m, 3H), 4.87 (s, 2H), 0.95 (s, 9H), 0.16 (s, 6H).

**$^{13}C$  NMR (150 MHz,  $CDCl_3$ )**  $\delta$  153.1, 151.3, 148.4, 138.2, 137.0, 135.5, 133.1, 132.9, 131.4, 130.0, 129.6, 128.4, 128.4, 128.3, 128.2, 128.0, 123.1, 76.4, 26.1, 19.1, -3.5.

**HRMS:** Calculated  $[M+H]^+$  for  $C_{27}H_{33}N_2O_2Si^+$ : 445.2306, found: 445.2308.

**FTIR ( $cm^{-1}$ ):** 3031, 2929, 2857, 1670, 1586, 1472, 1363, 1253, 1058, 1039, 1002, 838, 787, 751.

#### **tertbutyl dimethylsilyl (1Z,2E)-N-(benzyloxy)-2-(2-methoxyphenyl)-3-phenylacrylimidate (1o)**

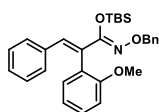

Following the general procedures for the synthesis of silyl imino ethers, in a flame-dried round bottom flask under Argon atmosphere, compound **12o** (359 mg, 1.0 mmol, 1.0 equiv.) was dissolved in dry THF (5 mL, 0.2 M) at room temperature. The reaction mixture was then cooled down to  $-78\text{ }^\circ\text{C}$  using an acetone-dry ice bath. A solution of KHMDS (1.2 mL, 1.2 equiv., 1.0 M in THF) was then added slowly. TBSCl (180 mg, 1.2 equiv.) was then added, and the reaction was allowed to warm to room temperature. The reaction was left stirring for 60 min until full conversion was overserved by TLC. The reaction mixture was then partitioned with 5 mL of  $H_2O$  and extracted with 10 mL of EtOAc three times. The combined organic layers were dried over  $Na_2SO_4$  and concentrated *in vacuo*. The reaction crude was then purified by column chromatography on silica gel (93:7 hexanes:EtOAc) to afford *tertbutyl* dimethylsilyl (1Z,2E)-N-(benzyloxy)-2-(2-methoxyphenyl)-3-phenylacrylimidate **1o** as a colorless oil (382 mg, 81%).

**$^1H$  NMR (600 MHz,  $CDCl_3$ )**  $\delta$  7.32 – 7.27 (m, 7H), 7.11 – 7.09 (m, 3H), 7.01 (dd,  $J = 7.6, 1.8$  Hz, 1H), 6.96 (dd,  $J = 6.8, 2.9$  Hz, 1H), 6.90 (ddd,  $J = 6.4, 3.4, 2.3$  Hz, 2H), 4.87 (s, 2H), 3.62 (s, 3H), 0.90 (s, 9H), 0.13 (s, 6H).

**$^{13}C$  NMR (150 MHz,  $CDCl_3$ )**  $\delta$  157.7, 153.5, 137.6, 136.4, 132.0, 131.7, 131.3, 129.6, 129.5, 129.0, 128.2, 128.1, 127.9, 127.5, 126.4, 120.8, 111.2, 76.1, 55.5, 26.0, 19.0, -3.7.

**HRMS:** Calculated  $[M+H]^+$  for  $C_{29}H_{36}NO_3Si^+$ : 474.2469, found: 474.2461.

**FTIR ( $cm^{-1}$ ):** 3029, 2958, 2930, 2884, 1598, 1582, 1470, 1461, 1295, 1247, 1055, 1003, 907, 751, 728, 693.

### **tertbutyl dimethylsilyl (1Z,2E)-N-(benzyloxy)-2-(4-methoxyphenyl)-3-phenylacrylimidate (1p)**

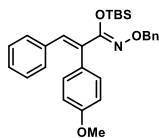

Following the general procedures for the synthesis of silyl imino ethers, in a flame-dried round bottom flask under Argon atmosphere, compound **12p** (1.08 g, 3.0 mmol, 1.0 equiv.) was dissolved in dry THF (30 mL, 0.2 M) at room temperature. The reaction mixture was then cooled down to  $-78\text{ }^{\circ}C$  using an acetone-dry ice bath. A solution of KHMDS (3.6 mL, 1.2 equiv., 1.0 M in THF) was then added slowly. TBSCl (540 mg, 1.2 equiv.) was then added, and the reaction was allowed to warm to room temperature. The reaction was left stirring for 60 min until full conversion was overserved by TLC. The reaction mixture was then partitioned with 20 mL of  $H_2O$  and extracted with 30 mL of EtOAc three times. The combined organic layers were dried over  $Na_2SO_4$  and concentrated *in vacuo*. The reaction crude was then purified by column chromatography on silica gel (93:7 hexanes:EtOAc) to afford *tertbutyl dimethylsilyl (1Z,2E)-N-(benzyloxy)-2-(4-methoxyphenyl)-3-phenylacrylimidate 1p* as a pale-yellow oil (1.33 g, 94%).

**$^1H$  NMR (600 MHz,  $CDCl_3$ )**  $\delta$  7.3 – 7.31 (m, 5H), 7.23 (s, 1H), 7.13 – 7.10 (m, 3H), 7.09 (d,  $J = 8.7$  Hz, 2H), 6.97 – 6.95 (m, 2H), 6.85 (d,  $J = 8.7$  Hz, 2H), 4.92 (s, 2H), 3.84 (s, 3H), 0.91 (s, 9H), 0.13 (s, 6H).

**$^{13}C$  NMR (150 MHz,  $CDCl_3$ )**  $\delta$  159.0, 154.1, 137.3, 136.3, 134.3, 131.6, 131.5, 130.0, 129.6, 129.0, 128.3, 128.1, 127.5, 113.7, 76.5, 55.4, 26.0, 19.0, -3.6.

**HRMS:** Calculated  $[M+H]^+$  for  $C_{29}H_{36}NO_3Si^+$ : 474.2459, found: 474.2463.

**FTIR ( $cm^{-1}$ ):** 3062, 3032, 2954, 2929, 2857, 1605, 1579, 1512, 1287, 1244, 1171, 1002, 823, 784, 693.

### **tertbutyl dimethylsilyl (1Z,2E)-N-(benzyloxy)-2,3-diphenylacrylimidate (1q)**

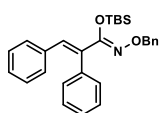

Following the general procedures for the synthesis of silyl imino ethers, in a flame-dried round bottom flask under Argon atmosphere, compound **12q** (988.2 mg, 3.0 mmol, 1.0 equiv.) was dissolved in dry THF (15 mL, 0.2 M) at room temperature. The reaction mixture was then cooled down to  $-78\text{ }^{\circ}C$  using an acetone-dry ice bath. A solution of KHMDS (3.6 mL, 1.2 equiv., 1.0 M in THF) was then added slowly. TBSCl (496 mg, 1.2 equiv.) was then added, and the reaction was allowed to warm to room temperature. The reaction was left stirring for 60 min until full conversion was overserved by TLC. The reaction mixture was then partitioned with 15 mL of  $H_2O$  and extracted with 20 mL of EtOAc three times. The combined organic layers were dried over  $Na_2SO_4$  and concentrated *in vacuo*. The reaction crude was then purified by column chromatography on silica gel (93:7 hexanes:EtOAc) to afford *tertbutyl dimethylsilyl (1Z,2E)-N-(benzyloxy)-2,3-diphenylacrylimidate 1q* as a colorless oil (882 mg, 66%).

**$^1H$  NMR (600 MHz,  $CDCl_3$ )**  $\delta$  7.32 – 7.30 (m, 8H), 7.27 (s, 1H), 7.18 – 7.16 (m, 2H), 7.12 – 7.09 (m, 3H), 6.93 – 6.91 (m, 2H), 4.90 (s, 2H), 0.91 (s, 9H), 0.13 (s, 6H).

**$^{13}C$  NMR (150 MHz,  $CDCl_3$ )**  $\delta$  153.9, 137.2, 136.9, 136.1, 134.7, 131.7, 130.4, 130.0, 139.6, 128.3, 128.3, 128.1, 127.6, 127.4, 76.3, 26.0, 19.0, -3.6.

**HRMS:** Calculated  $[M+H]^+$  for  $C_{28}H_{34}NO_2Si^+$ : 444.2353, found: 444.2358.

**Melting Point:** 81.7 – 84.5  $^{\circ}C$

**FTIR (cm<sup>-1</sup>):** 3057, 3030, 2952, 2930, 2882, 2854, 1599, 1583, 1491, 1470, 1443, 1360, 1301, 1250, 1055, 1012, 964, 839, 778, 696, 690.

**tertbutyl dimethylsilyl (1Z,2E)-N-(benzyloxy)-2-(4-nitrophenyl)-3-phenylacrylimidate (1r)**

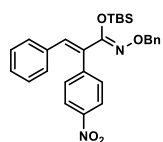

Following the general procedures for the synthesis of silyl imino ethers, in a flame-dried round bottom flask under Argon atmosphere, compound **12r** (1.3 g, 3.5 mmol, 1.0 equiv.) was dissolved in dry THF (35 mL, 0.2 M) at room temperature. The reaction mixture was then cooled down to -78 °C using an acetone-dry ice bath. A solution of KHMDS (4.2 mL, 1.2 equiv., 1.0 M in THF) was then added slowly. TBSCl (576 mg, 1.2 equiv.) was then added, and the reaction was allowed to warm to room temperature. The reaction was left stirring for 60 min until full conversion was overserved by TLC. The reaction mixture was then partitioned with 40 mL of H<sub>2</sub>O and extracted with 40 mL of EtOAc three times. The combined organic layers were dried over Na<sub>2</sub>SO<sub>4</sub> and concentrated *in vacuo*. The reaction crude was then purified by column chromatography on silica gel (93:7 hexanes:EtOAc) to afford *tertbutyl* dimethylsilyl (1Z,2E)-N-(benzyloxy)-2-(4-nitrophenyl)-3-phenylacrylimidate **1r** as a colorless oil (1.05 g, 55%).

**<sup>1</sup>H NMR (600 MHz, CDCl<sub>3</sub>)** δ 8.15 (d, *J* = 8.7 Hz, 2H), 7.38 (s, 1H), 7.33 – 7.30 (m, 5H), 7.26 – 7.24 (m, 1H), 7.16 – 7.11 (m, 3H), 6.89 – 6.87 (m, 2H), 4.85 (s, 2H), 0.96 (s, 9H), 0.18 (s, 6H).

**<sup>13</sup>C NMR (150 MHz, CDCl<sub>3</sub>)** δ 152.7, 147.2, 144.4, 137.0, 135.1, 133.0, 132.8, 131.7, 129.9, 129.6, 128.4, 128.3, 128.3, 128.3, 123.4, 76.4, 26.1, 19.1, -3.5.

**HRMS:** Calculated [M+H]<sup>+</sup> for C<sub>28</sub>H<sub>33</sub>N<sub>2</sub>O<sub>4</sub>Si<sup>+</sup>: 489.2204, found: 489.2209.

**FTIR (cm<sup>-1</sup>):** 2931, 1598, 1520, 1318, 1253, 1053, 104, 852, 787, 750, 697.

**tertbutyl dimethylsilyl (1Z,2E)-N-(benzyloxy)-3-(pyridine-2-yl)but-2-enimidate (1s)**

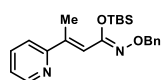

Following the general procedures for the synthesis of silyl imino ethers, in a flame-dried round bottom flask under Argon atmosphere, compound **12s** (2.0 g, 7.45 mmol, 1.0 equiv.) was dissolved in dry THF (37 mL, 0.2 M) at room temperature. The reaction mixture was then cooled down to -78 °C using an acetone-dry ice bath. A solution of KHMDS (9.0 mL, 1.2 equiv., 1.0 M in THF) was then added slowly. TBSCl (1.35 g, 1.2 equiv.) was then added, and the reaction was allowed to warm to room temperature. The reaction was left stirring for 60 min until full conversion was overserved by TLC. The reaction mixture was then partitioned with 40 mL of H<sub>2</sub>O and extracted with 40 mL of EtOAc three times. The combined organic layers were dried over Na<sub>2</sub>SO<sub>4</sub> and concentrated *in vacuo*. The reaction crude was then purified by column chromatography on silica gel (93:7 hexanes:EtOAc) to afford *tertbutyl* dimethylsilyl (1Z,2E)-N-(benzyloxy)-3-(pyridine-2-yl)but-2-enimidate **1s** as a colorless oil (497.1 mg, 17%).

**<sup>1</sup>H NMR (600 MHz, CDCl<sub>3</sub>)** δ 8.59 (ddd, *J* = 4.8, 1.9, 1.0 Hz, 1H), 7.65 (td, *J* = 7.6 Hz, 1H), 7.47 – 7.46 (m, 1H), 7.43 (d, *J* = 1.7 Hz, 2H), 7.37 – 7.34 (m, 2H), 7.32 – 7.30 (m, 1H), 7.17 (ddd, *J* = 7.5, 4.8, 1.1 Hz, 1H), 6.60 (d, *J* = 1.4 Hz, 1H), 5.05 (s, 2H), 2.40 (d, *J* = 1.4 Hz, 3H), 0.92 (s, 9H), 0.14 (s, 6H).

**<sup>13</sup>C NMR (150 MHz, CDCl<sub>3</sub>)** δ 159.1, 152.1, 149.1, 142.5, 137.6, 136.5, 129.1, 128.4, 128.1, 122.5, 121.4, 120.5, 76.2, 25.8, 18.8, 16.8, -3.8.

**HRMS:** Calculated [M+H]<sup>+</sup> for C<sub>22</sub>H<sub>31</sub>N<sub>2</sub>O<sub>2</sub>Si<sup>+</sup>: 383.2149, found: 383.2150.

**FTIR (cm<sup>-1</sup>):** 3206, 3033, 2953, 2929, 2857, 1635, 1584, 1465, 1432, 1360, 1250, 1054, 1003, 870, 833, 779, 696.

**tertbutyl dimethylsilyl (1Z,2E)-N-(benzyloxy)-3-(pyridine-3-yl)but-2-enimidate (1t)**

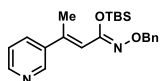

Following the general procedures for the synthesis of silyl imino ethers, in a flame-dried round bottom flask under Argon atmosphere, compound **12t** (658.8 mg, 2.0 mmol, 1.0 equiv.) was dissolved in dry THF (10 mL, 0.2 M) at room temperature. The reaction mixture was then cooled down to  $-78\text{ }^{\circ}\text{C}$  using an acetone-dry ice bath. A solution of KHMDS (2.4 mL, 1.2 equiv., 1.0 M in THF) was then added slowly. TBSCl (360 mg, 1.2 equiv.) was then added, and the reaction was allowed to warm to room temperature. The reaction was left stirring for 60 min until full conversion was overserved by TLC. The reaction mixture was then partitioned with 10 mL of H<sub>2</sub>O and extracted with 20 mL of EtOAc three times. The combined organic layers were dried over Na<sub>2</sub>SO<sub>4</sub> and concentrated *in vacuo*. The reaction crude was then purified by column chromatography on silica gel (93:7 hexanes:EtOAc) to afford *tertbutyl* dimethylsilyl (1Z,2E)-N-(benzyloxy)-3-(pyridine-3-yl)but-2-enimidate **1t** as a light yellow crystalline solid (482.8 mg, 54%).

**<sup>1</sup>H NMR (600 MHz, CDCl<sub>3</sub>)**  $\delta$  8.68 (dd,  $J = 2.5, 0.9$  Hz, 1H), 8.52 (dd,  $J = 4.8, 1.6$  Hz, 1H), 7.69 (ddd,  $J = 8.0, 2.4, 1.6$  Hz, 1H), 7.42 – 7.41 (m, 2H), 7.38 – 7.35 (m, 2H), 7.33 – 7.30 (m, 1H), 7.27 – 7.25 (m, 2H), 5.99 (q,  $J = 1.4$  Hz, 1H), 5.04 (s, 2H), 2.33 (d,  $J = 1.4$  Hz, 3H), 0.92 (s, 9H), 0.15 (s, 6H).

**<sup>13</sup>C NMR (150 MHz, CDCl<sub>3</sub>)**  $\delta$  151.4, 149.1, 147.6, 140.9, 138.5, 137.5, 133.4, 129.1, 128.4, 128.1, 123.3, 120.6, 76.3, 25.8, 18.7, 18.4, -3.8.

**HRMS:** Calculated [M+H]<sup>+</sup> for C<sub>22</sub>H<sub>31</sub>N<sub>2</sub>O<sub>2</sub>Si<sup>+</sup>: 383.2149, found: 383.2151.

**Melting Point:** 101.7 – 109.8  $^{\circ}\text{C}$

**FTIR (cm<sup>-1</sup>):** 3143, 3063, 3033, 2930, 2874, 1675, 1633, 1528, 1454, 1357, 1286, 1205, 1052, 943, 863, 752, 699.

**tertbutyl dimethylsilyl (Z)-N-(benzyloxy)-3,3-diphenylacrylimidate (1u)**

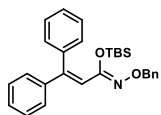

Following the general procedures for the synthesis of silyl imino ethers, in a flame-dried round bottom flask under Argon atmosphere, compound **12u** (533 mg, 1.62 mmol, 1.0 equiv.) was dissolved in dry THF (8 mL, 0.2 M) at room temperature. The reaction mixture was then cooled down to  $-78\text{ }^{\circ}\text{C}$  using an acetone-dry ice bath. A solution of KHMDS (2.0 mL, 1.2 equiv., 1.0 M in THF) was then added slowly. TBSCl (292 mg, 1.2 equiv.) was then added, and the reaction was allowed to warm to room temperature. The reaction was left stirring for 60 min until full conversion was overserved by TLC. The reaction mixture was then partitioned with 10 mL of H<sub>2</sub>O and extracted with 10 mL of EtOAc three times. The combined organic layers were dried over Na<sub>2</sub>SO<sub>4</sub> and concentrated *in vacuo*. The reaction crude was then purified by column chromatography on silica gel (93:7 hexanes:EtOAc) to afford *tertbutyl* dimethylsilyl (Z)-N-(benzyloxy)-3,3-diphenylacrylimidate **1u** as a white solid (607 mg, 84%).

**<sup>1</sup>H NMR (600 MHz, CDCl<sub>3</sub>)**  $\delta$  7.34 – 7.29 (m, 8H), 7.27 (s, 1H), 7.18 – 7.16 (m, 2H), 7.12 – 7.09 (m, 3H), 6.93 – 6.91 (m, 2H), 4.90 (s, 2H), 0.91 (s, 9H), 0.13 (s, 6H).

<sup>13</sup>C NMR (150 MHz, CDCl<sub>3</sub>) δ 153.9, 137.2, 136.9, 136.1, 134.7, 131.7, 130.4, 130.0, 139.6, 128.3, 128.3, 128.1, 128.1, 127.6, 127.4, 76.3, 26.0, 19.0, -3.6.

HRMS: Calculated [M+H]<sup>+</sup> for C<sub>28</sub>H<sub>34</sub>NO<sub>2</sub>Si<sup>+</sup>: 444.2353, found: 444.2360.

Melting Point: 111.0 – 112.1 °C

FTIR (cm<sup>-1</sup>): 3107, 3052, 2959, 1629, 1595, 1491, 1348, 1289, 1065, 970, 765, 739, 631.

#### *tert*butyl dimethylsilyl (1*Z*,2*E*)-*N*-(benzyloxy)-3-phenylbut-2-enimidate (**1v**)

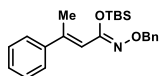

Following the general procedures for the synthesis of silyl imino ethers, in a flame-dried round bottom flask under Argon atmosphere, compound **12v** (1.0 g, 3.74 mmol, 1.0 equiv.) was dissolved in dry THF (20 mL, 0.2 M) at room temperature. The reaction mixture was then cooled down to –78 °C using an acetone-dry ice bath. A solution of KHMDS (4.86 mL, 1.2 equiv., 1.0 M in THF) was then added slowly. TBSCl (733 mg, 1.2 equiv.) was then added, and the reaction was allowed to warm to room temperature. The reaction was left stirring for 60 min until full conversion was overserved by TLC. The reaction mixture was then partitioned with 20 mL of H<sub>2</sub>O and extracted with 20 mL of EtOAc three times. The combined organic layers were dried over Na<sub>2</sub>SO<sub>4</sub> and concentrated *in vacuo*. The reaction crude was then purified by column chromatography on silica gel (93:7 hexanes:EtOAc) to afford *tert*butyl dimethylsilyl (1*Z*,2*E*)-*N*-(benzyloxy)-3-phenylbut-2-enimidate **1v** as a pale yellow oil (200 mg, 49%).

<sup>1</sup>H NMR (600 MHz, CDCl<sub>3</sub>) δ 7.43 – 7.41 (m, 4H), 7.37 – 7.27 (m, 6H), 5.97 (q, *J* = 1.4 Hz, 1H), 5.04 (s, 2H), 2.33 (d, *J* = 1.4 Hz, 3H), 0.92 (s, 9H), 0.14 (s, 6H).

<sup>13</sup>C NMR (150 MHz, CDCl<sub>3</sub>) δ 151.9, 144.3, 143.1, 137.7, 129.1, 128.5, 128.4, 128.0, 126.2, 119.0, 76.1, 25.8, 18.7, 18.6, -3.8.

HRMS: Calculated [M+H]<sup>+</sup> for C<sub>23</sub>H<sub>32</sub>NO<sub>2</sub>Si<sup>+</sup>: 382.2202, found: 382.2203.

FTIR (cm<sup>-1</sup>): 3063, 3032, 2953, 2929, 2857, 1634, 1577, 1471, 1349, 1289, 1251, 1233, 1053, 1003, 837, 784, 694.

#### *tert*butyl dimethylsilyl (*Z*)-*N*-(benzyloxy)-3-methylbut-2-enimidate (**1w**)

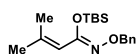

Following the general procedures for the synthesis of silyl imino ethers, in a flame-dried round bottom flask under Argon atmosphere, compound **12w** (821 mg, 4.0 mmol, 1.0 equiv.) was dissolved in dry THF (20 mL, 0.2 M) at room temperature. The reaction mixture was then cooled down to –78 °C using an acetone-dry ice bath. A solution of KHMDS (4.8 mL, 1.2 equiv., 1.0 M in THF) was then added slowly. TBSCl (721 mg, 1.2 equiv.) was then added, and the reaction was allowed to warm to room temperature. The reaction was left stirring for 60 min until full conversion was overserved by TLC. The reaction mixture was then partitioned with 20 mL of H<sub>2</sub>O and extracted with 20 mL of EtOAc three times. The combined organic layers were dried over Na<sub>2</sub>SO<sub>4</sub> and concentrated *in vacuo*. The reaction crude was then purified by column chromatography on silica gel (93:7 hexanes:EtOAc) to afford *tert*butyl dimethylsilyl (*Z*)-*N*-(benzyloxy)-3-methylbut-2-enimidate **1w** as a colorless oil (340 mg, 27%).

<sup>1</sup>H NMR (600 MHz, CDCl<sub>3</sub>) δ 7.40 – 7.38 (m, 2H), 7.35 – 7.32 (m, 2H), 7.30 – 7.28 (m, 1H), 5.46 (p, *J* = 1.4 Hz, 1H), 4.99 (s, 2H), 1.90 (d, *J* = 1.4 Hz, 3H), 1.80 (d, *J* = 1.4 Hz, 3H), 0.90 (s, 9H), 0.11 (s, 6H).

**<sup>13</sup>C NMR (150 MHz, CDCl<sub>3</sub>)** δ 151.7, 143.6, 137.8, 129.0, 128.3, 127.9, 117.1, 75.9, 26.8, 25.8, 20.6, 18.7, -3.9.

**HRMS:** Calculated [M+H]<sup>+</sup> for C<sub>18</sub>H<sub>30</sub>NO<sub>2</sub>Si<sup>+</sup>: 320.2040, found: 320.2040.

**FTIR (cm<sup>-1</sup>):** 3032, 2954, 2930, 2858, 1655, 1598, 1454, 1362, 1352, 1272, 1250, 1076, 1045, 996, 825, 784, 696.

**methyl (*E*)-3-phenyl-2-((*Z*)-6,6,7,7-tetramethyl-1-phenyl-2,5-dioxo-3-aza-6-silaoct-3-en-4-yl)acrylate (1x)**

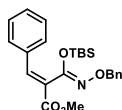

Following the general procedures for the synthesis of silyl imino ethers, in a flame-dried round bottom flask under Argon atmosphere, compound **12x** (623 mg, 2.0 mmol, 1.0 equiv.) was dissolved in dry THF (10 mL, 0.2 M) at room temperature. The reaction mixture was then cooled down to -78 °C using an acetone-dry ice bath. A solution of KHMDS (2.4 mL, 1.2 equiv., 1.0 M in THF) was then added slowly. TBSCl (362 mg, 1.2 equiv.) was then added, and the reaction was allowed to warm to room temperature. The reaction was left stirring for 60 min until full conversion was overserved by TLC. The reaction mixture was then partitioned with 10 mL of H<sub>2</sub>O and extracted with 10 mL of EtOAc three times. The combined organic layers were dried over Na<sub>2</sub>SO<sub>4</sub> and concentrated *in vacuo*. The reaction crude was then purified by column chromatography on silica gel (93:7 hexanes:EtOAc) to afford methyl (*E*)-3-phenyl-2-((*Z*)-6,6,7,7-tetramethyl-1-phenyl-2,5-dioxo-3-aza-6-silaoct-3-en-4-yl)acrylate **1x** as a light yellow oil (351.5 mg, 41%).

**<sup>1</sup>H NMR (600 MHz, CDCl<sub>3</sub>)** δ 7.79 (s, 1H), 7.51 – 7.49 (m, 2H), 7.35 – 7.28 (m, 8H), 4.99 (s, 2H), 3.81 (s, 3H), 0.82 (s, 9H), 0.15 (s, 6H).

**<sup>13</sup>C NMR (150 MHz, CDCl<sub>3</sub>)** δ 166.5, 147.8, 144.8, 137.8, 133.5, 130.5, 130.4, 128.7, 128.6, 128.4, 127.9, 124.4, 75.9, 52.4, 25.6, 18.6, -3.7.

**HRMS:** Calculated [M+H]<sup>+</sup> for C<sub>24</sub>H<sub>32</sub>NO<sub>4</sub>Si<sup>+</sup>: 426.2095, found: 426.2096.

**FTIR (cm<sup>-1</sup>):** 3064, 3031, 2952, 2929, 2857, 1719, 1619, 1435, 2145, 1199, 1082, 1069, 837, 786, 690.

**methyl (*E*)-3-(4-methoxyphenyl)-2-((*Z*)-6,6,7,7-tetramethyl-1-phenyl-2,5-dioxo-3-aza-6-silaoct-3-en-4-yl)acrylate (1y)**

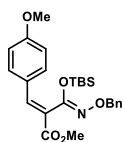

Following the general procedures for the synthesis of silyl imino ethers, in a flame-dried round bottom flask under Argon atmosphere, compound **12y** (682.7 mg, 2.0 mmol, 1.0 equiv.) was dissolved in dry THF (10 mL, 0.2 M) at room temperature. The reaction mixture was then cooled down to -78 °C using an acetone-dry ice bath. A solution of KHMDS (2.4 mL, 1.2 equiv., 1.0 M in THF) was then added slowly. TBSCl (362 mg, 1.2 equiv.) was then added, and the reaction was allowed to warm to room temperature. The reaction was left stirring for 60 min until full conversion was overserved by TLC. The reaction mixture was then partitioned with 10 mL of H<sub>2</sub>O and extracted with 10 mL of EtOAc three times. The combined organic layers were dried over Na<sub>2</sub>SO<sub>4</sub> and concentrated *in vacuo*. The reaction crude was then purified by column chromatography on silica gel (93:7 hexanes:EtOAc) to afford methyl (*E*)-3-(4-methoxyphenyl)-2-((*Z*)-6,6,7,7-tetramethyl-1-phenyl-2,5-dioxo-3-aza-6-silaoct-3-en-4-yl)acrylate **1y** as a light yellow oil (533.5 mg, 59%).



<sup>1</sup>H NMR (600 MHz, CDCl<sub>3</sub>) δ 7.73 (s, 1H), 7.46 (d, *J* = 8.4 Hz, 2H), 7.38 – 7.36 (m, 2H), 7.34 – 7.28 (m, 3H), 6.77 (d, *J* = 8.9 Hz, 2H), 5.01 (s, 2H), 3.83 (s, 3H), 3.80 (s, 3H), 0.83 (s, 9H), 0.16 (s, 6H).

<sup>13</sup>C NMR (150 MHz, CDCl<sub>3</sub>) δ 166.8, 161.5, 148.1, 144.6, 138.0, 132.6, 128.8, 128.4, 127.9, 126.1, 121.6, 114.1, 75.9, 55.5, 52.2, 25.6, 18.6, -3.8.

HRMS: Calculated [M+H]<sup>+</sup> for C<sub>25</sub>H<sub>34</sub>NO<sub>5</sub>Si<sup>+</sup>: 456.2201, found: 456.2204.

FTIR (cm<sup>-1</sup>): 2952, 2930, 2857, 1715, 1602, 1512, 1434, 1241, 1201, 1172, 1073, 1032, 824, 785, 697.

### methyl (Z)-3-ethyl-2-(6,6,7,7-tetramethyl-1-phenyl-2,5-dioxo-3-aza-6-silaoct-3-en-4-yl)pent-2-enoate (1z)

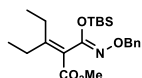

Following the general procedures for the synthesis of silyl imino ethers, in a flame-dried round bottom flask under Argon atmosphere, compound **12z** (582.7 mg, 2.0 mmol, 1.0 equiv.) was dissolved in dry THF (10 mL, 0.2 M) at room temperature. The reaction mixture was then cooled down to -78 °C using an acetone-dry ice bath. A solution of KHMDS (2.4 mL, 1.2 equiv., 1.0 M in THF) was then added slowly. TBSCl (362 mg, 1.2 equiv.) was then added, and the reaction was allowed to warm to room temperature. The reaction was left stirring for 60 min until full conversion was overserved by TLC. The reaction mixture was then partitioned with 10 mL of H<sub>2</sub>O and extracted with 10 mL of EtOAc three times. The combined organic layers were dried over Na<sub>2</sub>SO<sub>4</sub> and concentrated *in vacuo*. The reaction crude was then purified by column chromatography on silica gel (93:7 hexanes:EtOAc) to afford methyl (Z)-3-ethyl-2-(6,6,7,7-tetramethyl-1-phenyl-2,5-dioxo-3-aza-6-silaoct-3-en-4-yl)pent-2-enoate **1z** as a colorless oil (191.2 mg, 24%).

<sup>1</sup>H NMR (600 MHz, CDCl<sub>3</sub>) δ 7.39 – 7.37 (m, 2H), 7.35 – 7.32 (m, 2H), 7.30 – 7.27 (m, 1H), 5.01 (s, 2H), 3.69 (s, 3H), 2.49 (q, *J* = 7.5 Hz, 2H), 2.14 (q, *J* = 7.5 Hz, 2H), 1.09 (t, *J* = 7.5 Hz, 3H), 0.92 (t, *J* = 7.5 Hz, 3H), 0.85 (s, 9H), 0.15 (s, 6H).

<sup>13</sup>C NMR (150 MHz, CDCl<sub>3</sub>) δ 166.3, 166.0, 150.0, 138.1, 128.7, 128.3, 127.8, 121.8, 75.7, 51.5, 28.4, 25.9, 25.6, 18.6, 13.0, -3.8.

HRMS: Calculated [M+H]<sup>+</sup> for C<sub>22</sub>H<sub>36</sub>NO<sub>4</sub>Si<sup>+</sup>: 406.2408, found: 406.2408.

FTIR (cm<sup>-1</sup>): 3036, 2956, 2931, 2859, 1724, 1619, 1456, 1250, 1228, 1069, 841, 786, 697.

### methyl (Z)-3-((benzyloxy(imino)-3-((tert-butyldimethylsilyl)oxy)-2-cyclohexylidene)propanoate (1aa)

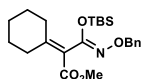

Following the general procedures for the synthesis of silyl imino ethers, in a flame-dried round bottom flask under Argon atmosphere, compound **12aa** (602 mg, 2.0 mmol, 1.0 equiv.) was dissolved in dry THF (10 mL, 0.2 M) at room temperature. The reaction mixture was then cooled down to -78 °C using an acetone-dry ice bath. A solution of KHMDS (2.4 mL, 1.2 equiv., 1.0 M in THF) was then added slowly. TBSCl (362 mg, 1.2 equiv.) was then added, and the reaction was allowed to warm to room temperature. The reaction was left stirring for 60 min until full conversion was overserved by TLC. The reaction mixture was then partitioned with 10 mL of H<sub>2</sub>O and extracted with 10 mL of EtOAc three times. The combined organic layers were dried over Na<sub>2</sub>SO<sub>4</sub> and concentrated *in vacuo*. The reaction crude was then purified by column chromatography on silica gel (93:7 hexanes:EtOAc) to afford methyl (Z)-3-((benzyloxy(imino)-3-((tert-butyldimethylsilyl)oxy)-2-cyclohexylidene)propanoate **1aa** as a colorless oil (785 mg, 95%).

$^1\text{H}$  NMR (600 MHz,  $\text{CDCl}_3$ )  $\delta$  7.39 – 7.37 (m, 2H), 7.34 – 7.31 (m, 2H), 7.30 – 7.27 (m, 1H), 5.01 (s, 2H), 3.70 (s, 3H), 2.68 – 2.66 (m, 2H), 2.22 (t,  $J$  = 5.8 Hz, 2H), 1.64 (dd,  $J$  = 7.8, 4.1 Hz, 2H), 1.55 (m, 4H), 0.85 (s, 9H), 0.13 (s, 6H).

$^{13}\text{C}$  NMR (150 MHz,  $\text{CDCl}_3$ )  $\delta$  166.4, 162.1, 150.0, 138.0, 128.9, 128.3, 127.9, 120.0, 75.8, 51.6, 34.1, 32.0, 28.6, 28.3, 26.3, 25.6, 18.6, -3.9.

HRMS: Calculated  $[\text{M}+\text{H}]^+$  for  $\text{C}_{23}\text{H}_{36}\text{NO}_4\text{Si}^+$ : 406.2408, found: 418.2414.

FTIR ( $\text{cm}^{-1}$ ): 3032, 2929, 2857, 1722, 1618, 1325, 1242, 1203, 1061, 1012, 843, 823, 811, 785, 696.

### ***tert*butyl dimethylsilyl (Z)-N-(benzyloxy)-3-methyl-1H-indene-1-carbimide (1ab)**

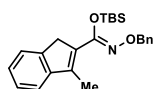

Following the general procedures for the synthesis of silyl imino ethers, in a flame-dried round bottom flask under Argon atmosphere, compound **12ab** (559 mg, 2.0 mmol, 1.0 equiv.) was dissolved in dry THF (10 mL, 0.2 M) at room temperature. The reaction mixture was then cooled down to  $-78$  °C using an acetone-dry ice bath. A solution of KHMDS (2.4 mL, 1.2 equiv., 1.0 M in THF) was then added slowly. TBSCl (362 mg, 1.2 equiv.) was then added, and the reaction was allowed to warm to room temperature. The reaction was left stirring for 60 min until full conversion was overserved by TLC. The reaction mixture was then partitioned with 10 mL of  $\text{H}_2\text{O}$  and extracted with 10 mL of EtOAc three times. The combined organic layers were dried over  $\text{Na}_2\text{SO}_4$  and concentrated *in vacuo*. The reaction crude was then purified by column chromatography on silica gel (93:7 hexanes:EtOAc) to afford *tert*butyl dimethylsilyl (Z)-N-(benzyloxy)-3-methyl-1H-indene-1-carbimide **1ab** as a pale-brown solid (554.4 mg, 70%).

$^1\text{H}$  NMR (600 MHz,  $\text{CDCl}_3$ )  $\delta$  7.46 – 7.42 (m, 3H), 7.38 – 7.36 (m, 3H), 7.34 – 7.30 (m, 2H), 7.25 – 7.22 (m, 1H), 5.05 (s, 2H), 3.58 (d,  $J$  = 2.3 Hz, 2H), 2.34 (s, 3H), 0.93 (s, 9H), 0.16 (s, 6H).

$^{13}\text{C}$  NMR (150 MHz,  $\text{CDCl}_3$ )  $\delta$  151.2, 146.6, 142.6, 141.0, 137.5, 131.9, 129.4, 128.4, 128.1, 126.5, 125.8, 123.6, 119.9, 76.2, 39.5, 26.0, 19.0, 12.8, -3.3.

HRMS: Calculated  $[\text{M}+\text{H}]^+$  for  $\text{C}_{24}\text{H}_{32}\text{NO}_2\text{Si}^+$ : 394.2197, found: 394.2209.

FTIR ( $\text{cm}^{-1}$ ): 3066, 2952, 2927, 2880, 2855, 1567, 1469, 1459, 1384, 1366, 1272, 1249, 1192, 1121, 1029, 984, 963, 786, 759, 767, 699.

### ***tert*butyl (Z)-3-(6,6,7,7-tetramethyl-1-phenyl-2,5-dioxo-3-aza-6-silaoct-3-en-4-yl)-1H-indole-1-carboxylate (1ac)**

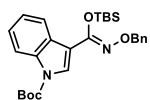

Following the general procedures for the synthesis of silyl imino ethers, in a flame-dried round bottom flask under Argon atmosphere, compound **12ac** (500 mg, 1.4 mmol, 1.0 equiv.) was dissolved in dry THF (7 mL, 0.2 M) at room temperature. The reaction mixture was then cooled down to  $-78$  °C using an acetone-dry ice bath. A solution of KHMDS (1.8 mL, 1.2 equiv., 1.0 M in THF) was then added slowly. TBSCl (267 mg, 1.2 equiv.) was then added, and the reaction was allowed to warm to room temperature. The reaction was left stirring for 60 min until full conversion was overserved by TLC. The reaction mixture was then partitioned with 10 mL of  $\text{H}_2\text{O}$  and extracted with 10 mL of EtOAc three times. The combined organic layers were dried over  $\text{Na}_2\text{SO}_4$  and concentrated *in vacuo*. The reaction crude was then purified by column chromatography on silica gel (93:7 hexanes:EtOAc) to

afford *tert*butyl (Z)-3-(6,6,7,7-tetramethyl-1-phenyl-2,5-dioxo-3-aza-6-sila-oct-3-en-4-yl)-1*H*-indole-1-carboxylate **1ac** as a pale-brown solid (460 mg, 70%).

**<sup>1</sup>H NMR (600 MHz, CDCl<sub>3</sub>)** δ 8.16 (d, *J* = 7.8 Hz, 1H), 8.14 (d, *J* = 7.1 Hz, 1H), 7.92 (s, 1H), 7.49 – 7.48 (m, 2H), 7.38 (t, *J* = 7.4 Hz, 2H), 7.35 – 7.31 (m, 2H), 7.28 – 7.26 (m, 1H), 5.14 (s, 2H), 1.66 (s, 9H), 0.99 (s, 9H), 0.18 (s, 6H).

**<sup>13</sup>C NMR (150 MHz, CDCl<sub>3</sub>)** δ 148.5, 137.5, 129.3, 128.4, 128.2, 127.1, 127.0, 125.0, 123.5, 123.1, 115.0, 114.9, 84.1, 76.5, 28.3, 26.1, 19.0, -3.7.

**HRMS:** Calculated [M+H]<sup>+</sup> for C<sub>27</sub>H<sub>37</sub>N<sub>2</sub>O<sub>4</sub>Si<sup>+</sup>: 481.2523, found: 481.2529.

**Melting Point:** 114.4 – 114.7 °C

**FTIR (cm<sup>-1</sup>):** 3060, 3034, 2959, 2933, 2886, 2856, 1730, 1613, 1554, 1450, 1399, 1361, 1284, 1211, 1146, 1072, 1004, 965, 785, 762, 703, 676.

### ***tert*butyl dimethylsilyl (Z)-*N*-(benzyloxy)-2-cycloheptyldeneacetimidate (1ad)**

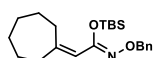

Following the general procedures for the synthesis of silyl imino ethers, in a flame-dried round bottom flask under Argon atmosphere, compound **12ad** (1.6 g, 6.17 mmol, 1.0 equiv.) was dissolved in dry THF (31 mL, 0.2 M) at room temperature. The reaction mixture was then cooled down to -78 °C using an acetone-dry ice bath. A solution of KHMDS (7.4 mL, 1.2 equiv., 1.0 M in THF) was then added slowly. TBSCl (1.11 g, 1.2 equiv.) was then added, and the reaction was allowed to warm to room temperature. The reaction was left stirring for 60 min until full conversion was overserved by TLC. The reaction mixture was then partitioned with 30 mL of H<sub>2</sub>O and extracted with 30 mL of EtOAc three times. The combined organic layers were dried over Na<sub>2</sub>SO<sub>4</sub> and concentrated *in vacuo*. The reaction crude was then purified by column chromatography on silica gel (93:7 hexanes:EtOAc) to afford *tert*butyl dimethylsilyl (Z)-*N*-(benzyloxy)-2-cycloheptyldeneacetimidate **1ad** as a colorless oil (527 mg, 23%).

**<sup>1</sup>H NMR (600 MHz, CDCl<sub>3</sub>)** δ 7.40 – 7.38 (m, 2H), 7.35 – 7.32 (m, 2H), 7.30 – 7.27 (m, 1H), 5.43 (p, *J* = 1.3 Hz, 1H), 4.98 (s, 2H), 2.56 – 2.54 (m, 2H), 2.30 – 2.27 (m, 2H), 1.61 – 1.55 (m, 4H), 1.52 – 1.47 (m, 4H), 0.90 (s, 9H), 0.10 (s, 6H).

**<sup>13</sup>C NMR (150 MHz, CDCl<sub>3</sub>)** δ 153.6, 151.4, 138.0, 129.1, 128.3, 127.9, 116.9, 75.9, 38.6, 32.5, 29.8, 29.6, 28.7, 27.0, 25.8, 18.7, -3.9.

**HRMS:** Calculated [M+H]<sup>+</sup> for C<sub>22</sub>H<sub>36</sub>NO<sub>2</sub>Si<sup>+</sup>: 374.2510, found: 374.2515.

**FTIR (cm<sup>-1</sup>):** 3032, 2927, 2856, 1641, 1594, 1472, 1456, 1251, 1056, 1005, 837, 824, 785, 969.

### ***tert*butyl dimethylsilyl (Z)-*N*-(benzyloxy)-2-cyclohexyldeneacetimidate (1ae)**

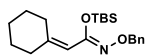

Following the general procedures for the synthesis of silyl imino ethers, in a flame-dried round bottom flask under Argon atmosphere, compound **12ae** (400 mg, 1.6 mmol, 1.0 equiv.) was dissolved in dry THF (16 mL, 0.2 M) at room temperature. The reaction mixture was then cooled down to -78 °C using an acetone-dry ice bath. A solution of KHMDS (1.9 mL, 1.2 equiv., 1.0 M in THF) was then added slowly. TBSCl (288 mg, 1.2 equiv.) was then added, and the reaction was allowed to warm to room temperature. The reaction was left stirring for 60 min until full conversion was overserved by TLC. The reaction mixture was then partitioned with 20 mL of H<sub>2</sub>O and extracted with 20 mL of EtOAc

three times. The combined organic layers were dried over Na<sub>2</sub>SO<sub>4</sub> and concentrated *in vacuo*. The reaction crude was then purified by column chromatography on silica gel (93:7 hexanes:EtOAc) to afford *tert*butyl dimethylsilyl (Z)-N-(benzyloxy)-2-cyclohexylideneacetimidate **1ae** as a colorless oil (260 mg, 45%).

<sup>1</sup>H NMR (600 MHz, CDCl<sub>3</sub>) δ 7.39 – 7.38 (m, 2H), 7.35 – 7.33 (m, 2H), 7.32 – 7.27 (m, 1H), 5.41 (p, *J* = 1.3 Hz, 1H), 4.98 (s, 2H), 2.47 – 2.45 (m, 2H), 2.14 – 2.12 (m, 2H), 1.60 – 1.49 (m, 6H), 0.89 (s, 9H), 0.10 (s, 6H).

<sup>13</sup>C NMR (150 MHz, CDCl<sub>3</sub>) δ 151.6, 151.1, 137.8, 129.1, 128.3, 127.9, 113.9, 75.9, 37.6, 30.5, 28.5, 27.7, 26.5, 25.8, 18.7, -3.9.

HRMS: Calculated [M+H]<sup>+</sup> for C<sub>21</sub>H<sub>34</sub>NO<sub>2</sub>Si<sup>+</sup>: 360.2353, found: 360.2357.

FTIR (cm<sup>-1</sup>): 3065, 3032, 2928, 2856, 1653, 1602, 1448, 1362, 1281, 1249, 1226, 1050, 1002, 823, 783, 695.

### ***tert*butyl dimethylsilyl (Z)-N-(benzyloxy)-2-cyclopentylideneacetimidate (1af)**

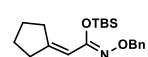

Following the general procedures for the synthesis of silyl imino ethers, in a flame-dried round bottom flask under Argon atmosphere, compound **12f** (925 mg, 4.0 mmol, 1.0 equiv.) was dissolved in dry THF (20 mL, 0.2 M) at room temperature. The reaction mixture was then cooled down to -78 °C using an acetone-dry ice bath. A solution of KHMDS (4.8 mL, 1.2 equiv., 1.0 M in THF) was then added slowly. TBSCl (781 mg, 1.2 equiv.) was then added, and the reaction was allowed to warm to room temperature. The reaction was left stirring for 60 min until full conversion was overserved by TLC. The reaction mixture was then partitioned with 20 mL of H<sub>2</sub>O and extracted with 20 mL of EtOAc three times. The combined organic layers were dried over Na<sub>2</sub>SO<sub>4</sub> and concentrated *in vacuo*. The reaction crude was then purified by column chromatography on silica gel (93:7 hexanes:EtOAc) to afford *tert*butyl dimethylsilyl (Z)-N-(benzyloxy)-2-cyclopentylideneacetimidate **1af** as a colorless oil (912 mg, 66%).

<sup>1</sup>H NMR (600 MHz, CDCl<sub>3</sub>) δ 7.40 – 7.38 (m, 2H), 7.35 – 7.32 (m, 2H), 7.30 – 7.28 (m, 1H), 5.58 (p, *J* = 2.4 Hz, 1H), 4.97 (s, 2H), 2.49 (tdt, *J* = 7.2, 2.8, 1.5 Hz, 2H), 2.35 (tdq, *J* = 7.1, 1.6 Hz, 2H), 1.70 – 1.63 (m, 2H), 1.62 – 1.58 (m, 2H), 0.90 (s, 9H), 0.11 (s, 6H).

<sup>13</sup>C NMR (150 MHz, CDCl<sub>3</sub>) δ 155.4, 152.3, 137.9, 129.1, 128.3, 127.9, 112.7, 75.9, 35.5, 32.6, 26.8, 26.1, 25.9, 18.8, -3.7.

HRMS: Calculated [M+H]<sup>+</sup> for C<sub>20</sub>H<sub>32</sub>NO<sub>2</sub>Si<sup>+</sup>: 346.2197, found: 346.2200.

FTIR (cm<sup>-1</sup>): 3032, 2954, 2930, 2858, 1656, 1583, 1454, 1362, 1304, 1251, 1054, 998, 835, 784, 695.

### ***tert*butyl dimethylsilyl (Z)-N-(benzyloxy)-2-cyclobutylideneacetimidate (1ag)**

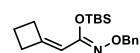

Following the general procedures for the synthesis of silyl imino ethers, in a flame-dried round bottom flask under Argon atmosphere, compound **12ag** (700 mg, 3.22 mmol, 1.0 equiv.) was dissolved in dry THF (20 mL, 0.2 M) at room temperature. The reaction mixture was then cooled down to -78 °C using an acetone-dry ice bath. A solution of KHMDS (4.2 mL, 1.2 equiv., 1.0 M in THF) was then added slowly. TBSCl (631 mg, 1.2 equiv.) was then added, and the reaction was allowed to warm to room temperature. The reaction was left stirring for 60 min until full conversion was overserved by TLC. The reaction mixture was then partitioned with 20 mL of H<sub>2</sub>O and extracted with 20 mL of EtOAc three times. The combined organic layers were dried over Na<sub>2</sub>SO<sub>4</sub> and concentrated *in vacuo*. The reaction

crude was then purified by column chromatography on silica gel (93:7 hexanes:EtOAc) to afford *tert*butyl dimethylsilyl (*Z*)-*N*-(benzyloxy)-2-cyclobutylideneacetimidate **1ag** as a colorless oil (370 mg, 35%).

**<sup>1</sup>H NMR (600 MHz, CDCl<sub>3</sub>)** δ 7.38 – 7.36 (m, 2H), 7.35 – 7.31 (m, 2H), 7.30 – 7.27 (s, 1H), 5.43 (p, *J* = 2.4 Hz, 1H), 4.94 (s, 2H), 2.92 (tp, *J* = 8.1, 1.4, 1.3 Hz, 2H), 2.74 (ddt, *J* = 8.2, 7.4, 2.4 Hz, 2H), 1.99 (h, *J* = 7.7 Hz, 2H), 0.98 (s, 9H), 0.10 (s, 6H).

**<sup>13</sup>C NMR (150 MHz, CDCl<sub>3</sub>)** δ 152.9, 152.1, 137.6, 129.1, 128.3, 127.9, 113.1, 75.9, 33.5, 32.3, 25.9, 18.9, 17.9, -3.4.

**HRMS:** Calculated [M+H]<sup>+</sup> for C<sub>19</sub>H<sub>30</sub>NO<sub>2</sub>Si<sup>+</sup>: 332.2040, found: 332.2096.

**FTIR (cm<sup>-1</sup>):** 3032, 2953, 2929, 2857, 1679, 1584, 1471, 1351, 1252, 1052, 1000, 836, 823, 810, 784, 695.

### ***tert*butyl dimethylsilyl (*Z*)-2-((1*r*,3*r*,5*R*,7*S*)-adamant-2-ylidene)-*N*-(benzyloxy)acetimidate (**1ah**)**

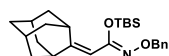

Following the general procedures for the synthesis of silyl imino ethers, in a flame-dried round bottom flask under Argon atmosphere, compound **12ahg** (892 mg, 3.0 mmol, 1.0 equiv.) was dissolved in dry THF (15 mL, 0.2 M) at room temperature. The reaction mixture was then cooled down to -78 °C using an acetone-dry ice bath. A solution of KHMDS (4.0 mL, 1.2 equiv., 1.0 M in THF) was then added slowly. TBSCl (586 mg, 1.2 equiv.) was then added, and the reaction was allowed to warm to room temperature. The reaction was left stirring for 60 min until full conversion was overserved by TLC. The reaction mixture was then partitioned with 20 mL of H<sub>2</sub>O and extracted with 20 mL of EtOAc three times. The combined organic layers were dried over Na<sub>2</sub>SO<sub>4</sub> and concentrated *in vacuo*. The reaction crude was then purified by column chromatography on silica gel (93:7 hexanes:EtOAc) to afford *tert*butyl dimethylsilyl (*Z*)-2-((1*r*,3*r*,5*R*,7*S*)-adamant-2-ylidene)-*N*-(benzyloxy)acetimidate **1ah** as a white solid (567 mg, 46%).

**<sup>1</sup>H NMR (600 MHz, CDCl<sub>3</sub>)** δ 7.39 – 7.38 (m, 2H), 7.34 – 7.32 (m, 2H), 7.32 – 7.27 (m, 1H), 5.37 (s, 1H), 4.95 (s, 2H), 3.40 (br, 1H), 2.37 (br, 1H), 1.93 – 1.77 (m, 12H), 0.89 (s, 9H), 0.10 (s, 6H).

**<sup>13</sup>C NMR (150 MHz, CDCl<sub>3</sub>)** δ 159.0, 151.6, 137.9, 129.2, 128.3, 127.9, 109.2, 75.9, 41.0, 39.9, 39.1, 37.2, 33.2, 28.3, 25.8, 18.8, -3.7.

**Melting Point:** 53.4 – 87.8 °C

**HRMS:** Calculated [M+H]<sup>+</sup> for C<sub>25</sub>H<sub>38</sub>NO<sub>2</sub>Si<sup>+</sup>: 412.2666, found: 412.2667.

**FTIR (cm<sup>-1</sup>):** 3032, 2953, 2922, 2901, 2849, 1651, 1593, 1366, 1262, 1243, 1211, 1054, 989, 959, 813, 783, 695.

### ***tert*butyl dimethylsilyl (*Z*)-*N*-(benzyloxy)-2-(tetrahydro-4*H*-pyran-4-ylidene)acetimidate (**1ai**)**

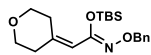

Following the general procedures for the synthesis of silyl imino ethers, in a flame-dried round bottom flask under Argon atmosphere, compound **12ai** (742 mg, 3.0 mmol, 1.0 equiv.) was dissolved in dry THF (15 mL, 0.2 M) at room temperature. The reaction mixture was then cooled down to -78 °C using an acetone-dry ice bath. A solution of KHMDS (4.0 mL, 1.2 equiv., 1.0 M in THF) was then added slowly. TBSCl (586 mg, 1.2 equiv.) was then added, and the reaction was allowed to warm to room temperature. The reaction was left stirring for 60 min until full conversion was overserved by TLC. The reaction mixture was then partitioned with 20 mL of H<sub>2</sub>O and extracted with 20 mL of EtOAc

three times. The combined organic layers were dried over Na<sub>2</sub>SO<sub>4</sub> and concentrated *in vacuo*. The reaction crude was then purified by column chromatography on silica gel (93:7 hexanes:EtOAc) to afford *tert*butyl dimethylsilyl (*Z*)-*N*-(benzyloxy)-2-(tetrahydro-4H-pyran-4-ylidene)acetimidate **1ai** as a white solid (512 mg, 47%).

**<sup>1</sup>H NMR (600 MHz, CDCl<sub>3</sub>)** δ 7.38 – 7.37 (m, 2H), 7.35 – 7.32 (m, 2H), 7.31 – 7.28 (m, 1H), 5.50 (p, *J* = 1.3 Hz, 1H), 4.97 (s, 2H), 3.72 (t, *J* = 5.5 Hz, 2H), 3.63 (t, *J* = 5.5 Hz, 2H), 2.64 (ddd, *J* = 6.2, 5.0, 1.3 Hz, 2H), 2.26 (ddd, *J* = 6.2, 5.0, 1.3 Hz, 2H), 0.90 (s, 9H), 0.11 (s, 6H).

**<sup>13</sup>C NMR (150 MHz, CDCl<sub>3</sub>)** δ 151.0, 145.1, 137.6, 129.1, 128.4, 128.0, 115.7, 76.0, 69.3, 68.6, 37.4, 31.7, 25.8, 18.7, -3.8.

**Melting Point:** 44.3 – 46.3 °C

**HRMS:** Calculated [M+H]<sup>+</sup> for C<sub>20</sub>H<sub>32</sub>NO<sub>3</sub>Si<sup>+</sup>: 362.2146, found: 362.2148.

**FTIR (cm<sup>-1</sup>):** 3032, 2955, 2930, 2856, 1658, 1601, 1386, 1362, 1273, 1251, 1099, 1051, 1003, 835, 810, 784, 696.

### **tertbutyl dimethylsilyl (1*Z*,3*E*)-*N*-(benzyloxy)-4-phenylbut-3-enimidate (1aj)**

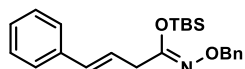

Following the general procedures for the synthesis of silyl imino ethers, in a flame-dried round bottom flask under Argon atmosphere, compound **12aj** (1.01 g, 3.78 mmol, 1.0 equiv.) was dissolved in dry THF (20 mL, 0.2 M) at room temperature.

The reaction mixture was then cooled down to –78 °C using an acetone-dry ice bath. A solution of KHMDS (7.6 mL, 1.2 equiv., 1.0 M in THF) was then added slowly. TBSCl (1.134 g, 1.2 equiv.) was then added, and the reaction was allowed to warm to room temperature. The reaction was left stirring for 60 min until full conversion was overserved by TLC. The reaction mixture was then partitioned with 20 mL of H<sub>2</sub>O and extracted with 20 mL of EtOAc three times. The combined organic layers were dried over Na<sub>2</sub>SO<sub>4</sub> and concentrated *in vacuo*. The reaction crude was then purified by column chromatography on silica gel (93:7 hexanes:EtOAc) to afford *tert*butyl dimethylsilyl (*Z*)-*N*-(benzyloxy)-4-phenylbut-3-enimidate **1aj** as a pale yellow oil (1.158 g, 80%).

**<sup>1</sup>H NMR (600 MHz, CDCl<sub>3</sub>)** δ 7.39 – 7.29 (m, 10H), 6.49 (dd, *J* = 15.8, 1.6 Hz, 1H), 6.22 (dt, *J* = 15.9, 7.0 Hz, 1H), 4.95 (s, 2H), 3.05 (dd, *J* = 7.0, 1.5 Hz, 2H), 0.88 (s, 9H), 0.09 (s, 6H).

**<sup>13</sup>C NMR (150 MHz, CDCl<sub>3</sub>)** δ 153.3, 137.3, 133.0, 129.4, 128.9, 128.5, 128.3, 127.3, 126.4, 126.2, 124.1, 75.7, 36.7, 25.7, 18.6, -3.9.

**HRMS:** Calculated [M+H]<sup>+</sup> for C<sub>23</sub>H<sub>32</sub>NO<sub>2</sub>Si<sup>+</sup>: 382.2197, found: 382.2203.

**FTIR (cm<sup>-1</sup>):** 3030, 2929, 2857, 1635, 1362, 1252, 1055, 966, 787, 696.

### **tertbutyl dimethylsilyl (*Z*)-*N*-(benzyloxy)-4-methylpent-4-enimidate (1ak)**

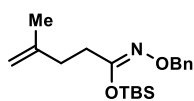

Following the general procedures for the synthesis of silyl imino ethers, in a flame-dried round bottom flask under Argon atmosphere, compound **12ak** (948 mg, 4.33 mmol, 1.0 equiv.) was dissolved in dry THF (22 mL, 0.2 M) at room temperature. The

reaction mixture was then cooled down to –78 °C using an acetone-dry ice bath. A solution of KHMDS (5.2 mL, 1.2 equiv., 1.0 M in THF) was then added slowly. TBSCl (780 mg, 1.2 equiv.) was then added, and the reaction was allowed to warm to room temperature. The reaction was left stirring for 60 min until full

conversion was overserved by TLC. The reaction mixture was then partitioned with 20 mL of H<sub>2</sub>O and extracted with 20 mL of EtOAc three times. The combined organic layers were dried over Na<sub>2</sub>SO<sub>4</sub> and concentrated *in vacuo*. The reaction crude was then purified by column chromatography on silica gel (93:7 hexanes:EtOAc) to afford *tert*butyl dimethylsilyl (*Z*)-*N*-(benzyloxy)-4-methylpent-4-enimide **1ak** as a colorless oil (984 mg, 68%).

<sup>1</sup>H NMR (600 MHz, CDCl<sub>3</sub>) δ 7.38 – 7.36 (m, 2H), 7.35 – 7.32 (m, 2H), 7.31 – 7.28 m (1H), 4.92 (s, 2H), 4.72 (m, 1H), 4.70 (m, 1H), 2.26 (s, 4H), 1.72 (t, *J* = 1.72 Hz, 3H), 0.89 (s, 9H), 0.09 (s, 6H).

<sup>13</sup>C NMR (150 MHz, CDCl<sub>3</sub>) δ 154.6, 144.7, 137.6, 128.9, 128.4, 128.0, 110.6, 75.6, 34.2, 31.6, 25.8, 22.5, 18.7, -3.8.

HRMS: Calculated [M+H]<sup>+</sup> for C<sub>19</sub>H<sub>32</sub>NO<sub>2</sub>Si<sup>+</sup>: 334.2197, found: 334.2203.

FTIR (cm<sup>-1</sup>): 3068, 3033, 2955, 2930, 2858, 1635, 1472, 1362, 1251, 1052, 1003, 889, 822, 811, 696.

### *tert*butyl dimethylsilyl (*Z*)-*N*-(benzyloxy)-5-phenylhex-5-enimide (**1al**)

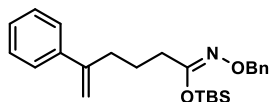

In a flame-dried round-bottom flask under Argon atmosphere, methyltriphenylphosphonium bromide (186 mg, 1.2 equiv.) was suspended in dry Et<sub>2</sub>O (2.2 mL, 0.2 M). The reaction mixture was then cooled down to 0 °C using an ice-water cooling bath under vigorous stirring. Then *n*-BuLi (0.19 mL, 1.1 equiv., 2.5 M solution in hexanes) was added dropwise with vigorous stirring. The reaction turned bright yellow and was allowed to stir for 5 min. Then compound **1al'** was added slowly and the reaction was allowed to warm to room temperature and stirred overnight. The bright yellow color disappeared, and a white precipitate was formed. After the 16h, the reaction mixture was allowed to cool down to room temperature. The solids were filtered and washed thrice with Et<sub>2</sub>O (10 mL). The filtrate was then concentrated *in vacuo*. The crude reaction mixture was purified by column chromatography on silica gel (97/03 hexanes:EtOAc) to afford *tert*butyl dimethylsilyl (*Z*)-*N*-(benzyloxy)-5-phenylhex-5-enimide **1al** as colorless oil (50 mg, 28%).

<sup>1</sup>H NMR (600 MHz, CDCl<sub>3</sub>) δ 7.39 – 7.36 (m, 4H), 7.34 – 7.28 (m, 5H), 7.25 – 7.24 (m, 1H), 7.38 (s, 5H), 5.02 (d, *J* = 10.9 Hz, 1H), 4.98 (d, *J* = 10.9 Hz, 1H), 4.36 (s, 1H), 3.92 – 3.89 (m, 1H), 3.81 (dddd, *J* = 12.0, 4.8, 3.8, 1.1 Hz, 1H), 3.53 (ddd, *J* = 12.0, 10.5, 3.0 Hz, 1H), 3.44 (ddd, *J* = 12.0, 10.8, 2.8 Hz, 1H), 2.08 (ddd, *J* = 13.7, 10.8, 4.5 Hz, 1H), 1.74 (dtd, *J* = 13.9, 3.2, 3.1, 2.2 Hz, 1H), 1.67 (ddd, *J* = 13.8, 10.5, 4.7 Hz, 1H), 1.52 (ddt, *J* = 13.7, 3.7, 2.5 Hz, 1H).

<sup>13</sup>C NMR (150 MHz, CDCl<sub>3</sub>) δ 154.6, 147.9, 141.1, 137.6, 129.4, 128.9, 128.5, 128.4, 128.4, 128.0, 127.5, 126.3, 112.8, 75.6, 34.7, 32.4, 25.8, 24.7, 18.6, -3.9.

HRMS: Calculated [M+H]<sup>+</sup> for C<sub>25</sub>H<sub>36</sub>NO<sub>2</sub>Si<sup>+</sup>: 410.2510, found: 410.2515.

FTIR (cm<sup>-1</sup>): 3024, 2930, 2858, 1635, 1495, 1456, 1364, 1216, 1055, 837, 779, 698.

### *tert*butyl dimethylsilyl (*Z*)-*N*-(benzyloxy)-5-oxo-5-phenylpentanimide (**1al'**)

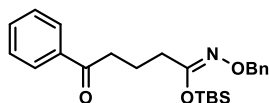

Following the general procedures for the synthesis of silyl imino ethers, in a flame-dried round bottom flask under Argon atmosphere, compound **12al** (569 mg, 1.91 mmol, 1.0 equiv.) was dissolved in dry THF (10 mL, 0.2 M) at room temperature. The reaction mixture was then cooled down to -78 °C using an acetone-dry ice bath. A solution of KHMDS (2.1 mL, 1.2 equiv., 1.0 M in THF) was then added slowly. TBSCl (316 mg, 1.2 equiv.) was then added, and the reaction was allowed to warm to room temperature. The reaction was left

stirring for 60 min until full conversion was overserved by TLC. The reaction mixture was then partitioned with 10 mL of H<sub>2</sub>O and extracted with 10 mL of EtOAc three times. The combined organic layers were dried over Na<sub>2</sub>SO<sub>4</sub> and concentrated *in vacuo*. The reaction crude was then purified by column chromatography on silica gel (95:5 hexanes:EtOAc) to afford *tert*butyl dimethylsilyl (*Z*)-*N*-(benzyloxy)-5-oxo-5-phenylpentanimidate **1aI'** as a colorless oil (178 mg, 23%).

<sup>1</sup>H NMR (600 MHz, CDCl<sub>3</sub>) δ 7.93 – 7.91 (m, 2H), 7.57 – 7.54 (m, 1H), 7.46 – 7.43 (m, 2H), 7.37 – 7.36 (m, 2H), 7.33 – 7.30 (m, 2H), 7.29 – 7.26 (m, 1H), 4.92 (s, 2H), 2.97 (dd, *J* = 7.8, 7.0 Hz, 2H), 2.24 (t, *J* = 7.1 Hz, 2H), 2.01 (p, *J* = 7.2 Hz, 2H), 0.89 (s, 9H), 0.10 (s, 6H).

<sup>13</sup>C NMR (150 MHz, CDCl<sub>3</sub>) δ 199.9, 154.2, 137.7, 137.1, 133.1, 128.9, 128.7, 128.4, 128.2, 128.0, 75.6, 37.6, 32.8, 25.8, 20.5, 18.7, -3.9.

HRMS: Calculated [M+H]<sup>+</sup> for C<sub>24</sub>H<sub>34</sub>NO<sub>3</sub><sup>+</sup>: 412.2302, found: 412.2310.

FTIR (cm<sup>-1</sup>): 3064, 3031, 2954, 2930, 2858, 1738, 1634, 1449, 1363, 1251, 1228, 1054, 824, 786.

### *tert*butyl dimethylsilyl (*Z*)-*N*-(benzyloxy)-6-phenylhept-6-enimidate (**1am**)

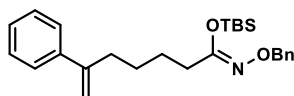

In a flame-dried round-bottom flask under Argon atmosphere, methyltriphenylphosphonium bromide (397 mg, 1.2 equiv.) was suspended in dry Et<sub>2</sub>O (4.6 mL, 0.2 M). The reaction mixture was then cooled down to 0 °C using an ice-water cooling bath under vigorous stirring. Then *n*-BuLi (0.41 mL, 1.1 equiv., 2.5 M solution in hexanes) was added dropwise with vigorous stirring. The reaction turned bright yellow and was allowed to stir for 5 min. Then compound **1am'** was added slowly and the reaction was allowed to warm to room temperature and stirred overnight. The bright yellow color disappeared, and a white precipitate was formed. After the 16h, the reaction mixture was allowed to cool down to room temperature. The solids were filtered and washed thrice with Et<sub>2</sub>O (10 mL). The filtrate was then concentrated *in vacuo*. The crude reaction mixture was purified by column chromatography on silica gel (97/03 hexanes:EtOAc) to afford *tert*butyl dimethylsilyl (*Z*)-*N*-(benzyloxy)-6-phenylhept-6-enimidate **1am** as colorless oil (124 mg, 32%).

<sup>1</sup>H NMR (600 MHz, CDCl<sub>3</sub>) δ 7.40 – 7.38 (m, 2H), 7.37 – 7.27 (m, 7H), 7.26 – 7.24 (m, 1H), 5.26 (d, *J* = 1.5 Hz, 1H), 5.05 (q, *J* = 1.4 Hz, 1H), 4.91 (s, 2H), 2.51 (dt, *J* = 7.5, 1.3 Hz, 2H), 2.13 – 2.10 (m, 2H), 1.59 (dtd, *J* = 8.7, 7.5, 6.2 Hz, 2H), 1.50 – 1.45 (m, 2H), 0.88 (s, 9H), 0.07 (s, 6H).

<sup>13</sup>C NMR (150 MHz, CDCl<sub>3</sub>) δ 154.9, 148.4, 141.4, 137.5, 129.0, 128.4, 128.4, 128.0, 127.4, 126.3, 112.5, 75.6, 35.1, 32.7, 27.7, 25.8, 18.7, -3.9.

HRMS: Calculated [M+H]<sup>+</sup> for C<sub>26</sub>H<sub>32</sub>NO<sub>2</sub>Si<sup>+</sup>: 424.2666, found: 424.2672.

FTIR (cm<sup>-1</sup>): 3028, 2970, 2930, 2858, 1634, 1455, 1206, 1055, 786, 698.

### *tert*butyl dimethylsilyl (*Z*)-*N*-(benzyloxy)-6-oxo-6-phenylhexanimidate (**1am'**)

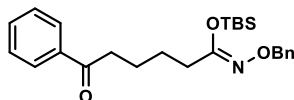

Following the general procedures for the synthesis of silyl imino ethers, in a flame-dried round bottom flask under Argon atmosphere, compound **12am** (955 mg, 3.07 mmol, 1.0 equiv.) was dissolved in dry THF (16 mL, 0.2 M) at room temperature. The reaction mixture was then cooled down to -78 °C using an acetone-dry ice bath. A solution of KHMDS (3.4 mL, 1.2 equiv., 1.0 M in THF) was then added slowly. TBSCl (506 mg, 1.2 equiv.) was then added, and the reaction was allowed to warm to room temperature. The reaction was left stirring for 60 min until full conversion was overserved by TLC. The reaction mixture was then partitioned



with 20 mL of H<sub>2</sub>O and extracted with 20 mL of EtOAc three times. The combined organic layers were dried over Na<sub>2</sub>SO<sub>4</sub> and concentrated *in vacuo*. The reaction crude was then purified by column chromatography on silica gel (95:5 hexanes:EtOAc) to afford *tert*butyl dimethylsilyl (*Z*)-*N*-(benzyloxy)-6-oxo-6-phenylhexanimidate **1am'** as a colorless oil (394 mg, 30%).

<sup>1</sup>H NMR (600 MHz, CDCl<sub>3</sub>) δ 7.95 – 7.94 (m, 2H), 7.57 – 7.54 (m, 1H), 7.47 – 7.44 (m, 2H), 7.37 – 7.35 (m, 2H), 7.34 – 7.31 (m, 2H), 7.29 – 7.27 (m, 1H), 4.91 (s, 2H), 2.98 – 2.95 (m, 2H), 2.19 – 2.16 (m, 2H), 1.79 – 1.74 (m, 2H), 1.69 – 1.64 (m, 2H), 0.92 (s, 9H), 0.10 (s 6H).

<sup>13</sup>C NMR (150 MHz, CDCl<sub>3</sub>) δ 200.2, 154.6, 137.5, 137.1, 133.1, 129.0, 128.7, 128.4, 128.2, 128.0, 75.6, 38.3, 32.7, 25.8, 23.7, 18.7, 18.1, -3.9.

HRMS: Calculated [M+H]<sup>+</sup> for C<sub>25</sub>H<sub>36</sub>NO<sub>3</sub>Si<sup>+</sup>: 426.2459, found: 426.2463.

FTIR (cm<sup>-1</sup>): 3064, 3032, 2953, 2930, 2858, 1728, 1634, 1450, 1362, 1276, 1252, 1055, 1002, 787.

## 12. Synthesis and characterization of hydroxamate esters (12):

### *N*-methoxycinnamamide (12a)

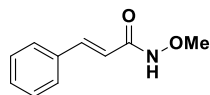

Following **Method B** from the general procedures for the synthesis of hydroxamate esters, in a flame-dried round-bottom flask under Argon atmosphere, MeONH<sub>2</sub>·HCl (958 mg, 11.47 ml, 2.0 equiv.) was suspended in dry Toluene (29 mL, 0.2 M). The reaction mixture was then cooled down to -40 °C using an acetone cooling bath. Then a solution of AlMe<sub>3</sub> (5.7 mL, 2M in toluene, 2.0 equiv.) was added dropwise avoiding a spike in temperature greater than 20 °C. After the addition was done, methyl cinnamate (930 mg, 5.74 mmol, 1.0 equiv.) was added, the reaction was allowed to warm to room temperature, and it was allowed to stir overnight. The reaction was then quenched with 3M HCl until gas evolution ceased. The reaction mixture was then partitioned with 30 mL H<sub>2</sub>O and extracted three times with 30 mL EtOAc. The combined organic layers were dried over Na<sub>2</sub>SO<sub>4</sub> and concentrated *in vacuo*. The crude reaction mixture was purified by column chromatography on silica gel (80:20 hexanes:EtOAc) to afford *N*-methoxycinnamamide **12a** as a white crystalline solid. The NMR data matches the one reported in the literature.<sup>5</sup>

<sup>1</sup>H NMR (600 MHz, CDCl<sub>3</sub>) δ 8.67 (br, 1H), 7.76 (d, *J* = 15.8 Hz, 1H), 7.53 (m, 2H), 7.37 (m, 3H), 6.42 (brs, 1H), 3.84 (s, 3H).

### *N*-methoxycinnamamide (12b)

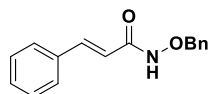

Following **Method A** from the general procedures for the synthesis of hydroxamate esters, in an oven-dried round-bottom flask under Argon atmosphere, BnONH<sub>2</sub>·HCl (1.0 equiv.) was suspended in THF:DCM (226 mL, 1:1, 0.2 M) at room temperature. The reaction mixture was cooled down to 0 °C using a water-ice bath. NEt<sub>3</sub> (26 mL, 1.5 equiv.) was added, and the reaction mixture was allowed to stir for 60 min at 0 °C. HOBt hydrate (10.36 g, 1.0 equiv.) and cinnamic acid (10 g, 1.0 equiv.) were added subsequently, and the reaction was allowed to stir for an additional 60 min at 0 °C. Finally, NEt<sub>3</sub> (26 mL, 1.5 equiv.) were added, reaction was allowed to warm up to room temperature and it was allowed to stir for 48 h. The reaction was then filtered, and the obtained

<sup>5</sup> K. Inamoto, J. Kawasaki, K. Hiroya, Y. Kondo, T. Doi. *Chem. Commun.* **2012**, 48, 4332–4334.

filtrate was diluted with 100 mL of EtOAc and then washed once with 50 mL HCl (3 M), followed by one wash with 50 mL conc. NaHCO<sub>3</sub> and finally with 50 mL H<sub>2</sub>O. The combined organic layers were dried over Na<sub>2</sub>SO<sub>4</sub> and concentrated *in vacuo*. The crude reaction mixture was purified by column chromatography on silica gel (70/30 hexanes:EtOAc) to afford *N*-benzyloxycinnamide **12b** as a white powder (12.55 g, 73%). The NMR data matches the one reported in the literature.<sup>6</sup>

<sup>1</sup>H NMR (600 MHz, CDCl<sub>3</sub>) δ 8.12 (br, 1H), 7.74 (d, *J* = 15.5 Hz, 1H), 7.50 – 7.49 (m, 2H), 7.44 – 7.36 (m, 8H), 4.97 (s, 2H).

### *N*-((4-methoxybenzyl)oxy)cinnamamide (**12c**)

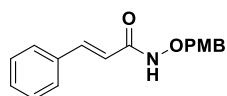

Following **Method A** from the general procedures for the synthesis of hydroxamate esters, in an oven-dried round-bottom flask under Argon atmosphere, *O*-(4-methoxybenzyl)hydroxylamine (3.1g, 1.0 equiv.) was suspended in THF:DCM (100 mL, 1:1, 0.2 M) at room temperature. The reaction mixture was cooled down to 0 °C using a water-ice bath. NEt<sub>3</sub> (4.2 mL, 1.5 equiv.) was added, and the reaction mixture was allowed to stir for 30 min at 0 °C. HOBT hydrate (3.1 g, 1.0 equiv.) and cinnamic acid (3.0 g, 1.0 equiv.) were added subsequently, and the reaction was allowed to stir for an additional 30 min at 0 °C. Finally, NEt<sub>3</sub> (4.2 mL, 1.5 equiv.) were added, reaction was allowed to warm up to room temperature and it was allowed to stir overnight. The reaction was then filtered, and the obtained filtrate was diluted with 50 mL of EtOAc and then washed once with 25 mL HCl (3 M), followed by one wash with 25 mL conc. NaHCO<sub>3</sub> and finally with 25 mL H<sub>2</sub>O. The combined organic layers were dried over Na<sub>2</sub>SO<sub>4</sub> and concentrated *in vacuo*. The crude reaction mixture was purified by column chromatography on silica gel (70/30 hexanes:EtOAc) to afford *N*-((4-methoxybenzyl)oxy)cinnamamide **12c** as a white powder (4.6 g, 80%). The NMR data matches the one reported in the literature.<sup>7</sup>

<sup>1</sup>H NMR (600 MHz, CDCl<sub>3</sub>) δ 8.10 (br, 1H), 7.75 – 7.71 (d, *J* = 15.7 Hz, 1H), 7.50 – 7.49 (m, 2H), 7.38 – 7.35 (m, 5H), 6.92 (d, *J* = 8.6 Hz, 2H), 6.27 (bs, 1H), 4.91 (s, 2H), 3.80 (s, 3H).

### *N*-hydroxycinnamamide (**12d**)

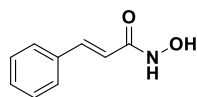

Following a known literature procedure<sup>8</sup> *N*-hydroxycinnamamide **12d** was prepared as a pale pink powder. The NMR data matches the one reported in the literature.<sup>9</sup>

<sup>1</sup>H NMR (600 MHz, CDCl<sub>3</sub>) δ 7.69 (bs, 1H), 7.48 (bs, 2H), 7.35 (bs, 3H), 6.37 (bs, 1H).

### *N*-phenoxycinnamamide (**12e**)

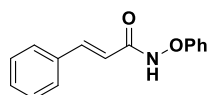

In an oven-dried round-bottom flask under Argon atmosphere, *O*-phenylhydroxylamine hydrochloride (1.95 g, 1.0 equiv.) was suspended in DCM (66,

<sup>6</sup> Gissot, A., Volonterio, A., Zanda, M. *J. Org. Chem.* **2005**, 70(17), 6925–6928.

<sup>7</sup> Zhang, N., Yang, R., Zhang-Negrerie, D., Du, Y., Zhao, K. *J. Org. Chem.* **2012**, 78(17), 8705–8711.

<sup>8</sup> Usachova, N., Leitis, G., Jirgensons, A., Kalvinsh, I. *Synth. Commun.* **2010**, 40, 927–935.

<sup>9</sup> Porcheddu, A., Giacomelli, G. *J. Org. Chem.* **2006**, 71(18), 7057–7059.

0.2 M) at room temperature. The reaction mixture was cooled down to 0 °C using a water-ice bath. EDCI·HCl (3.8 g, 1.5 equiv.) and DMAP (1.93 g, 1.2 equiv.) were added subsequently, and the reaction was allowed to stir for an additional 30 min at 0 °C. Finally, cinnamic acid (1.95 g, 13.17 mmol) were added, reaction was allowed to warm up to room temperature and it was allowed to stir overnight. The reaction was then washed once with 50 mL H<sub>2</sub>O and extracted with DCM 3 x 70 mL. The combined organic layers were dried over Na<sub>2</sub>SO<sub>4</sub> and concentrated *in vacuo*. The crude reaction mixture was purified by column chromatography on silica gel (60/40 hexanes:EtOAc) to afford *N*-phenoxyacrylamide **12e** as a white powder (1.1 g, 35%).

<sup>1</sup>H NMR (600 MHz, CDCl<sub>3</sub>) δ 12.03 (bs, 1H), 7.65 – 7.64 (m, 2H), 7.60 (d, *J* = 16.0 Hz, 1H), 7.46 – 7.42 (m, 3H), 7.36 – 7.33 (m, 2H), 7.06 – 7.03 (m, 3H), 6.62 (d, *J* = 16.0 Hz, 1H).

<sup>13</sup>C NMR (150 MHz, CDCl<sub>3</sub>) δ 159.5, 140.8, 134.4, 130.0, 129.5, 129.0, 127.9, 122.4, 117.6, 112.9.

HRMS: Calculated [M+H]<sup>+</sup> for C<sub>15</sub>H<sub>14</sub>NO<sub>2</sub><sup>+</sup>: 240.1019, found: 240.1025.

Melting Point: 149.9 – 151.8 °C

FTIR (cm<sup>-1</sup>): 3118, 3055, 2925, 2857, 1667, 1625, 1589, 1487, 1343, 1118, 1044, 979, 750.

### (*E*)-*N*-(benzyloxy)-3-(naphthalen-2-yl)acrylamide (**12f**)

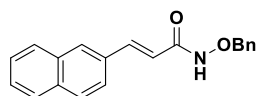

Following **Method B** from the general procedures for the synthesis of hydroxamate esters, in a flame-dried round-bottom flask under Argon atmosphere, BnONH<sub>2</sub>·HCl (1.81 g, 11.32 mmol, 2.0 equiv.) was suspended in dry Toluene (28 mL, 0.2 M). The reaction mixture was then cooled down to –40 °C using an acetone cooling bath. Then a solution of AlMe<sub>3</sub> (5.7 mL, 2M in toluene, 2.0 equiv.) was added dropwise avoiding a spike in temperature greater than 20 °C. After the addition was done, compound **13f** (1.2 g, 5.66 mmol, 1.0 equiv.) was added, the reaction was allowed to warm to room temperature, and it was allowed to stir overnight. The reaction was then quenched with 3M HCl until gas evolution ceased. The reaction mixture was then partitioned with 30 mL H<sub>2</sub>O and extracted three times with 30 mL EtOAc. The combined organic layers were dried over Na<sub>2</sub>SO<sub>4</sub> and concentrated *in vacuo*. The crude reaction mixture was purified by column chromatography on silica gel (80:20 hexanes:EtOAc) to afford (*E*)-*N*-(benzyloxy)-3-(naphthalene-2-yl)acrylamide **12f** as a white crystalline solid (601 mg, 54%).

<sup>1</sup>H NMR (600 MHz, DMSO-*d*<sub>6</sub>) δ 11.32 (s, 1H), 8.10 (s, 1H), 7.96 – 7.92 (m, 3H), 7.72 – 7.71 (m, 1H), 7.67 (d, *J* = 15.8 Hz, 1H), 7.56 (dt, *J* = 6.2, 3.4 Hz, 2H), 7.45 – 7.35 (m, 5H), 6.58 (d, *J* = 15.8 Hz, 1H), 4.90 (s, 2H).

<sup>13</sup>C NMR (150 MHz, DMSO-*d*<sub>6</sub>) δ 163.0, 139.6, 136.0, 133.5, 133.0, 132.2, 129.0, 128.8, 128.6, 128.4, 128.3, 127.7, 127.0, 126.7, 123.5, 119.0, 77.0.

HRMS: Calculated [M+H]<sup>+</sup> for C<sub>20</sub>H<sub>18</sub>NO<sub>2</sub><sup>+</sup>: 304.1332, found: 304.1342.

Melting Point: 140.6 – 141.2 °C

FTIR (cm<sup>-1</sup>): 3193, 3058, 3035, 2994, 1648, 1622, 1509, 1497, 1050, 976, 962, 739, 694.

### (*E*)-*N*-(benzyloxy)-3-(naphthalen-2-yl)acrylamide (**12g**)

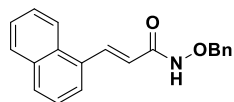

Following **Method B** from the general procedures for the synthesis of hydroxamate esters, in a flame-dried round-bottom flask under Argon atmosphere, BnONH<sub>2</sub>·HCl (1.81 g, 11.32 mmol, 2.0 equiv.) was suspended in dry Toluene (28 mL, 0.2 M). The

reaction mixture was then cooled down to  $-40\text{ }^{\circ}\text{C}$  using an acetone cooling bath. Then a solution of  $\text{AlMe}_3$  (5.7 mL, 2M in toluene, 2.0 equiv.) was added dropwise avoiding a spike in temperature greater than  $20\text{ }^{\circ}\text{C}$ . After the addition was done, compound **13g** (1.2 g, 5.66 mmol, 1.0 equiv.) was added, the reaction was allowed to warm to room temperature, and it was allowed to stir overnight. The reaction was then quenched with 3M HCl until gas evolution ceased. The reaction mixture was then partitioned with 30 mL  $\text{H}_2\text{O}$  and extracted three times with 30 mL EtOAc. The combined organic layers were dried over  $\text{Na}_2\text{SO}_4$  and concentrated *in vacuo*. The crude reaction mixture was purified by column chromatography on silica gel (80:20 hexanes:EtOAc) to afford (*E*)-*N*-(benzyloxy)-3-(naphthalene-2-yl)acrylamide **14g** as a white crystalline solid (453 mg, 26%).

$^1\text{H NMR}$  (600 MHz,  $\text{DMSO-d}_6$ )  $\delta$  11.41 (s, 1H), 8.28 (d,  $J = 15.6$  Hz, 1H), 8.20 (d,  $J = 8.4$  Hz, 1H), 7.99 (d,  $J = 8.0$  Hz, 2H), 7.78 (d,  $J = 7.2$  Hz, 1H), 7.65 – 7.62 (m, 1H), 7.60 – 7.55 (m, 2H), 7.46 (d,  $J = 7.0$  Hz, 2H), 7.41 (d,  $J = 7.4$  Hz, 2H), 7.36 (d,  $J = 7.2$  Hz, 1H), 6.53 (d,  $J = 15.6$  Hz, 1H), 4.92 (s, 2H).

$^{13}\text{C NMR}$  (150 MHz,  $\text{DMSO-d}_6$ )  $\delta$  162.8, 136.0, 133.3, 131.7, 130.7, 129.8, 128.8, 128.7, 128.4, 128.3, 127.0, 126.3, 125.7, 124.6, 123.1, 121.6, 77.1.

**HRMS:** Calculated  $[\text{M}+\text{H}]^+$  for  $\text{C}_{20}\text{H}_{18}\text{NO}_2^+$ : 304.1332, found: 304.1332.

**Melting Point:**  $157.8 - 160.0\text{ }^{\circ}\text{C}$

**FTIR** ( $\text{cm}^{-1}$ ): 3230, 3059, 2990, 1656, 1618, 1506, 1348, 1051, 967, 790, 774, 750.

#### (*Z*)-*N*-(benzyloxy)-2-bromo-3-phenylacrylamide (**12j**)

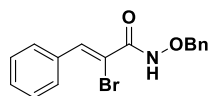

Following **Method A** from the general procedures for the synthesis of hydroxamate esters, in an oven-dried round-bottom flask under Argon atmosphere,  $\text{BnONH}_2\cdot\text{HCl}$  (1.27 g, 1.0 equiv.) was suspended in THF:DCM (40 mL, 1:1, 0.2 M) at room temperature. The reaction mixture was cooled down to  $0\text{ }^{\circ}\text{C}$  using a water-ice bath.  $\text{NEt}_3$  (1.7 mL, 1.5 equiv.) was added, and the reaction mixture was allowed to stir for 630 min at  $0\text{ }^{\circ}\text{C}$ .  $\text{HOBT}$  hydrate (1.22 g, 1.0 equiv.) and compound **15j** (1.8 g, 1.0 equiv.) were added subsequently, and the reaction was allowed to stir for an additional 30 min at  $0\text{ }^{\circ}\text{C}$ . Finally,  $\text{NEt}_3$  (1.7 mL, 1.5 equiv.) were added, reaction was allowed to warm up to room temperature and it was allowed to stir overnight. The reaction was then filtered, and the obtained filtrate was diluted with 50 mL of EtOAc and then washed once with 50 mL HCl (3 M), followed by one wash with 50 mL conc.  $\text{NaHCO}_3$  and finally with 50 mL  $\text{H}_2\text{O}$ . The combined organic layers were dried over  $\text{Na}_2\text{SO}_4$  and concentrated *in vacuo*. The crude reaction mixture was purified by column chromatography on silica gel (70/30 hexanes:EtOAc) to afford (*Z*)-*N*-(benzyloxy)-2-bromo-3-phenylacrylamide **12j** as a yellow powder (1.6 g, 61%).

$^1\text{H NMR}$  (600 MHz,  $\text{CDCl}_3$ )  $\delta$  9.13 (s, 1H), 8.32 (s, 1H), 7.75 – 7.74 (m, 2H), 7.46 – 7.43 (m, 2H), 7.42 – 7.39 (m, 6H), 5.02 (s, 2H).

$^{13}\text{C NMR}$  (150 MHz,  $\text{CDCl}_3$ )  $\delta$  160.5, 138.7, 134.9, 133.7, 130.2, 130.1, 129.6, 129.2, 128.9, 128.6, 110.8, 78.7.

**HRMS:** Calculated  $[\text{M}+\text{H}]^+$  for  $\text{C}_{16}\text{H}_{15}\text{BrNO}_2^+$ : 332.0281, found: 332.0283.

**Melting Point:**  $55.1 - 56.1\text{ }^{\circ}\text{C}$

**FTIR** ( $\text{cm}^{-1}$ ): 3228, 3057, 3033, 2954, 1654, 1610, 1481, 1445, 1268, 1082, 1064, 738, 688.

### (Z)-N-(benzyloxy)-2-chloro-3-phenylacrylamide (12k)

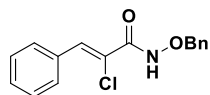

Following **Method A** from the general procedures for the synthesis of hydroxamate esters, in an oven-dried round-bottom flask under Argon atmosphere, BnONH<sub>2</sub>·HCl (1.05 g, 1.0 equiv.) was suspended in THF:DCM (32 mL, 1:1, 0.2 M) at room temperature. The reaction mixture was cooled down to 0 °C using a water-ice bath. NEt<sub>3</sub> (2.5 mL, 1.5 equiv.) was added, and the reaction mixture was allowed to stir for 630 min at 0 °C. HOBt hydrate (1.0 g, 1.0 equiv.) and compound **13k** (1.2 g, 1.0 equiv.) were added subsequently, and the reaction was allowed to stir for an additional 30 min at 0 °C. Finally, NEt<sub>3</sub> (2.5 mL, 1.5 equiv.) were added, reaction was allowed to warm up to room temperature and it was allowed to stir overnight. The reaction was then filtered, and the obtained filtrate was diluted with 50 mL of EtOAc and then washed once with 50 mL HCl (3 M), followed by one wash with 50 mL conc. NaHCO<sub>3</sub> and finally with 50 mL H<sub>2</sub>O. The combined organic layers were dried over Na<sub>2</sub>SO<sub>4</sub> and concentrated *in vacuo*. The crude reaction mixture was purified by column chromatography on silica gel (70/30 hexanes:EtOAc) to afford (Z)-N-(benzyloxy)-2-chloro-3-phenylacrylamide **12k** as a white powder (728 mg, 38%).

<sup>1</sup>H NMR (600 MHz, CDCl<sub>3</sub>) δ 9.09 (bs, 1H), 8.02 (s, 1H), 7.77 – 7.75 (m, 2H), 7.46 – 7.39 (m, 8H), 5.02 (s, 2H).

<sup>13</sup>C NMR (150 MHz, CDCl<sub>3</sub>) δ 160.6, 135.0, 134.9, 132.9, 130.7, 130.2, 129.6, 129.2, 128.9, 128.7, 120.4, 78.7.

HRMS: Calculated [M+H]<sup>+</sup> for C<sub>16</sub>H<sub>15</sub>ClNO<sub>2</sub><sup>+</sup>: 288.0786, found: 288.0787.

Melting Point: 89.8 – 91.6 °C

FTIR (cm<sup>-1</sup>): 3239, 3092, 3036, 2883, 1656, 1614, 1482, 1444, 1272, 1262, 1085, 1067, 739, 690.

### (E)-N-(benzyloxy)-2-methyl-3-phenylacrylamide (12l)

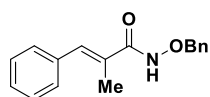

Following **Method A** from the general procedures for the synthesis of hydroxamate esters, in an oven-dried round-bottom flask under Argon atmosphere, BnONH<sub>2</sub>·HCl (1.5 g, 1.0 equiv.) was suspended in THF:DCM (46 mL, 1:1, 0.2 M) at room temperature. The reaction mixture was cooled down to 0 °C using a water-ice bath. NEt<sub>3</sub> (2.0 mL, 1.5 equiv.) was added, and the reaction mixture was allowed to stir for 30 min at 0 °C. HOBt hydrate (1.42 g, 1.0 equiv.) and compound **13l** (1.5 g, 1.0 equiv.) were added subsequently, and the reaction was allowed to stir for an additional 30 min at 0 °C. Finally, NEt<sub>3</sub> (2.0 mL, 1.5 equiv.) were added, reaction was allowed to warm up to room temperature and it was allowed to stir overnight. The reaction was then filtered, and the obtained filtrate was diluted with 50 mL of EtOAc and then washed once with 50 mL HCl (3 M), followed by one wash with 50 mL conc. NaHCO<sub>3</sub> and finally with 50 mL H<sub>2</sub>O. The combined organic layers were dried over Na<sub>2</sub>SO<sub>4</sub> and concentrated *in vacuo*. The crude reaction mixture was purified by column chromatography on silica gel (70/30 hexanes:EtOAc) to afford (E)-N-(benzyloxy)-2-methyl-3-phenylacrylamide **12l** as a white powder (1.0 g, 40%).

<sup>1</sup>H NMR (600 MHz, CDCl<sub>3</sub>) δ 8.63 (bs, 1H), 7.45 – 7.43 (m, 2H), 7.40 – 7.35 (m, 5H), 7.30 – 7.28 (m, 3H), 7.17 (s, 1H), 5.00 (s, 2H), 2.04 (d, J = 1.6 Hz, 3H).

<sup>13</sup>C NMR (150 MHz, CDCl<sub>3</sub>) δ 168.7, 135.6, 135.5, 134.6, 129.9, 129.4, 128.9, 128.8, 128.7, 128.5, 128.4, 128.2, 78.3, 14.2.

**HRMS:** Calculated  $[M+H]^+$  for  $C_{17}H_{18}NO_2^+$ : 268.1332, found: 268.1346.

**Melting Point:** 89.8 – 93.0 °C

**FTIR (cm<sup>-1</sup>):** 3221, 3059, 2930, 1652, 1618, 1498, 1448, 1278, 1004, 910, 694.

### (*E*)-2-benzylidene-*N*-(benzyloxy)hexanamide (12m)

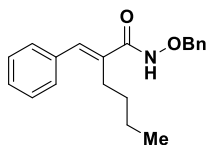

Following **Method A** from the general procedures for the synthesis of hydroxamate esters, in an oven-dried round-bottom flask under Argon atmosphere,  $BnONH_2 \cdot HCl$  (860 mg, 1.0 equiv.) was suspended in THF:DCM (28 mL, 1:1, 0.2 M) at room temperature. The reaction mixture was cooled down to 0 °C using a water-ice bath.

$NEt_3$  (2.1 mL, 1.5 equiv.) was added, and the reaction mixture was allowed to stir for 30 min at 0 °C.  $HOBT$  hydrate (827 mg, 1.0 equiv.) and compound **13m** (1.1 g, 1.0 equiv.) were added subsequently, and the reaction was allowed to stir for an additional 30 min at 0 °C. Finally,  $NEt_3$  (2.1 mL, 1.5 equiv.) were added, reaction was allowed to warm up to room temperature and it was allowed to stir overnight. The reaction was then filtered, and the obtained filtrate was diluted with 40 mL of EtOAc and then washed once with 40 mL HCl (3 M), followed by one wash with 40 mL conc.  $NaHCO_3$  and finally with 40 mL  $H_2O$ . The combined organic layers were dried over  $Na_2SO_4$  and concentrated *in vacuo*. The crude reaction mixture was purified by column chromatography on silica gel (80/20 hexanes:EtOAc) to afford (*E*)-2-benzylidene-*N*-(benzyloxy)hexanamide **12l** as a colorless oil (1.01 g, 61%).

**<sup>1</sup>H NMR (600 MHz,  $CDCl_3$ )**  $\delta$  8.49 (s, 1H), 7.46 – 7.44 (m, 2H), 7.41 – 7.34 (m, 5H), 7.30 – 7.27 (m, 1H), 7.24 – 7.23 (m, 2H), 6.93 (s, 1H), 5.01 (s, 2H), 2.49 – 2.47 (m, 2H), 1.43 (ddt,  $J = 12.1, 8.0, 3.9$  Hz, 2H), 1.32 (h, 7.3 Hz, 2H), 0.87 (t,  $J = 7.3$  Hz).

**<sup>13</sup>C NMR (150 MHz,  $CDCl_3$ )**  $\delta$  168.8, 136.6, 135.6, 135.5, 133.1, 129.5, 129.0, 128.9, 128.7, 128.5, 128.1, 78.2, 30.9, 27.8, 22.8, 13.9.

**HRMS:** Calculated  $[M+H]^+$  for  $C_{20}H_{24}NO_2^+$ : 310.1802, found: 310.1809.

**FTIR (cm<sup>-1</sup>):** 3189, 3029, 2956, 2929, 2871, 1738, 1648, 1621, 1494, 1455, 1365, 1217, 910, 731, 694.

### (*E*)-*N*-(benzyloxy)-3-phenyl-2-(pyridin-3-yl)acrylamide (12n)

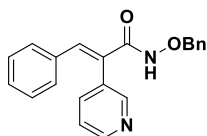

Following **Method A** from the general procedures for the synthesis of hydroxamate esters, in an oven-dried round-bottom flask under Argon atmosphere,  $BnONH_2 \cdot HCl$  (184.2 mg, 1.0 equiv.) was suspended in THF:DCM (12 mL, 1:1, 0.2 M) at room temperature. The reaction mixture was cooled down to 0 °C using a water-ice bath.

$NEt_3$  (0.24 mL, 1.5 equiv.) was added, and the reaction mixture was allowed to stir for 30 min at 0 °C.  $HOBT$  hydrate (176.8 mg, 1.0 equiv.) and compound **15n** (260 mg, 1.0 equiv.) were added subsequently, and the reaction was allowed to stir for an additional 30 min at 0 °C. Finally,  $NEt_3$  (0.24 mL, 1.5 equiv.) were added, reaction was allowed to warm up to room temperature and it was allowed to stir overnight. The reaction was then filtered, and the obtained filtrate was diluted with 10 mL of EtOAc and then washed once with 10 mL HCl (3 M), followed by one wash with 10 mL conc.  $NaHCO_3$  and finally with 1 mL  $H_2O$ . The combined organic layers were dried over  $Na_2SO_4$  and concentrated *in vacuo*. The crude reaction mixture was purified by column chromatography on silica gel (50/50 hexanes:EtOAc) to afford (*E*)-*N*-(benzyloxy)-3-phenyl-2-(pyridine-3-yl)acrylamide **12n** as a white powder (1.0 g, 40%).

<sup>1</sup>H NMR (600 MHz, CDCl<sub>3</sub>) δ 8.48 (bs, 1H), 8.28 (bs, 1H), 8.16 (s, 1H), 7.86 (s, 1H), 7.47 – 7.45 (m, 1H), 7.37 – 7.33 (m, 5H), 7.25 – 7.22 (m, 2H), 7.20 – 7.14 (m, 2H), 6.95 – 6.93 (m, 2H), 4.97 (s, 2H).

<sup>13</sup>C NMR (150 MHz, CDCl<sub>3</sub>) δ 165.0, 150.4, 149.7, 139.8, 137.6, 135.1, 134.0, 131.2, 130.5, 129.6, 129.4, 129.1, 128.9, 128.8, 128.7, 128.6, 124.1, 78.3.

HRMS: Calculated [M+H]<sup>+</sup> for C<sub>21</sub>H<sub>19</sub>N<sub>2</sub>O<sub>2</sub><sup>+</sup>: 331.1441, found: 331.1449.

Melting Point: 153.8 – 155.8 °C

FTIR (cm<sup>-1</sup>): 3139, 3033, 2929, 1667, 1616, 1494, 1265, 1209, 1057, 1037, 905, 730.

### (E)-N-(benzyloxy)-2-(2-methoxyphenyl)-3-phenylacrylamide (12o)

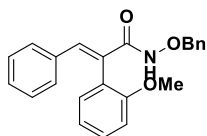

Following **Method A** from the general procedures for the synthesis of hydroxamate esters, in an oven-dried round-bottom flask under Argon atmosphere, BnONH<sub>2</sub>·HCl (1.57 mg, 1.0 equiv.) was suspended in THF:DCM (50 mL, 1:1, 0.2 M) at room temperature. The reaction mixture was cooled down to 0 °C using a water-ice bath. NEt<sub>3</sub> (2.1 mL, 1.5 equiv.) was added, and the reaction mixture was allowed to stir for 30 min at 0 °C. HOBt hydrate (1.51 g, 1.0 equiv.) and compound **13o** (2.5 g, 1.0 equiv.) were added subsequently, and the reaction was allowed to stir for an additional 30 min at 0 °C. Finally, NEt<sub>3</sub> (2.1 mL, 1.5 equiv.) were added, reaction was allowed to warm up to room temperature and it was allowed to stir overnight. The reaction was then filtered, and the obtained filtrate was diluted with 50 mL of EtOAc and then washed once with 50 mL HCl (3 M), followed by one wash with 50 mL conc. NaHCO<sub>3</sub> and finally with 50 mL H<sub>2</sub>O. The combined organic layers were dried over Na<sub>2</sub>SO<sub>4</sub> and concentrated *in vacuo*. The crude reaction mixture was purified by column chromatography on silica gel (70/30 hexanes:EtOAc) to afford (E)-N-(benzyloxy)-2-(2-methoxyphenyl)-3-phenylacrylamide **12o** as an off-white powder (2.57 g, 44%).

<sup>1</sup>H NMR (600 MHz, CDCl<sub>3</sub>) δ 8.01 (s, 1H), 7.83 (s, 1H), 7.37 – 7.32 (m, 6H), 7.19 – 7.16 (m, 1H), 7.14 – 7.12 (m, 2H), 7.01 – 6.99 (m, 3H), 6.93 – 6.90 (m, 2H), 4.95 (m, 2H), 3.67 (s, 3H).

<sup>13</sup>C NMR (150 MHz, CDCl<sub>3</sub>) δ 165.7, 157.3, 138.3, 135.4, 135.1, 131.3, 130.6, 130.2, 129.4, 129.2, 128.8, 128.8, 128.7, 128.3, 123.8, 121.8, 111.6, 78.3, 55.7.

HRMS: Calculated [M+H]<sup>+</sup> for C<sub>23</sub>H<sub>22</sub>NO<sub>3</sub><sup>+</sup>: 360.1594, found: 360.1599.

Melting Point: 104.8 – 107.0 °C

FTIR (cm<sup>-1</sup>): 3193, 3065, 3022, 2960, 1644, 1597, 1487, 1461, 1242, 1021, 762, 691.

### (E)-N-(benzyloxy)-2-(4-methoxyphenyl)-3-phenylacrylamide (12p)

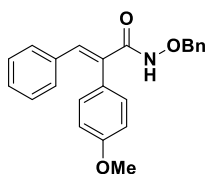

Following **Method A** from the general procedures for the synthesis of hydroxamate esters, in an oven-dried round-bottom flask under Argon atmosphere, BnONH<sub>2</sub>·HCl (942 mg, 1.0 equiv.) was suspended in THF:DCM (30 mL, 1:1, 0.2 M) at room temperature. The reaction mixture was cooled down to 0 °C using a water-ice bath. NEt<sub>3</sub> (2.2 mL, 1.5 equiv.) was added, and the reaction mixture was allowed to stir for 30 min at 0 °C. HOBt hydrate (905 mg, 1.0 equiv.) and compound **13p** (1.5 g, 1.0 equiv.) were added subsequently, and the reaction was allowed to stir for an additional 30 min at 0 °C. Finally, NEt<sub>3</sub> (2.2 mL, 1.5 equiv.) were added, reaction was allowed to warm up to room temperature and it was allowed to stir overnight. The reaction was then filtered, and the obtained filtrate was diluted with 50 mL of EtOAc and

then washed once with 50 mL HCl (3 M), followed by one wash with 50 mL conc. NaHCO<sub>3</sub> and finally with 50 mL H<sub>2</sub>O. The combined organic layers were dried over Na<sub>2</sub>SO<sub>4</sub> and concentrated *in vacuo*. The crude reaction mixture was purified by column chromatography on silica gel (70/30 hexanes:EtOAc) to afford (*E*)-*N*-(benzyloxy)-2-(4-methoxyphenyl)-3-phenylacrylamide **12p** as an off-white powder (1.12 g, 53%).

<sup>1</sup>H NMR (600 MHz, CDCl<sub>3</sub>) δ 7.84 (s, 1H), 7.81 (s, 1H), 7.37 – 7.34 (m, 5H), 7.20 – 7.17 (m, 1H), 7.16 – 7.13 (m, 2H), 7.04 – 7.01 (m, 4H), 6.86 (d, *J* = 8.7 Hz, 2H), 4.96 (s, 2H), 3.83 (s, 3H).

<sup>13</sup>C NMR (150 MHz, CDCl<sub>3</sub>) δ 159.9, 137.8, 135.2, 134.8, 131.6, 130.9, 130.6, 129.5, 128.9, 128., 128.4, 126.8, 115.1, 78.3, 55.4.

HRMS: Calculated [M+H]<sup>+</sup> for C<sub>23</sub>H<sub>22</sub>NO<sub>3</sub><sup>+</sup>: 360.1594, found: 360.1608.

Melting Point: 104.6 – 106.4 °C

FTIR (cm<sup>-1</sup>): 3180, 3029, 2996, 2967, 1655, 1616, 1489, 1450, 1239, 1173, 1050, 907, 830, 751, 692.

### (*E*)-*N*-(benzyloxy)-2,3-diphenylacrylamide (**12q**)

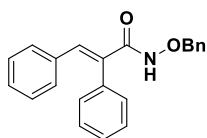

Following **Method A** from the general procedures for the synthesis of hydroxamate esters, in an oven-dried round-bottom flask under Argon atmosphere, BnONH<sub>2</sub>·HCl (6.38 mg, 1.0 equiv.) was suspended in THF:DCM (200 mL, 1:1, 0.2 M) at room temperature. The reaction mixture was cooled down to 0 °C using a water-ice bath.

NEt<sub>3</sub> (8.4 mL, 1.5 equiv.) was added, and the reaction mixture was allowed to stir for 30 min at 0 °C. HOBT hydrate (6.12 g, 1.0 equiv.) and compound **13q** (8.96 g, 1.0 equiv.) were added subsequently, and the reaction was allowed to stir for an additional 30 min at 0 °C. Finally, NEt<sub>3</sub> (8.4 mL, 1.5 equiv.) were added, reaction was allowed to warm up to room temperature and it was allowed to stir overnight. The reaction was then filtered, and the obtained filtrate was diluted with 100 mL of EtOAc and then washed once with 100 mL HCl (3 M), followed by one wash with 100 mL conc. NaHCO<sub>3</sub> and finally with 100 mL H<sub>2</sub>O. The combined organic layers were dried over Na<sub>2</sub>SO<sub>4</sub> and concentrated *in vacuo*. The crude reaction mixture was purified by column chromatography on silica gel (70/30 hexanes:EtOAc) to afford (*E*)-*N*-(benzyloxy)-2,3-diphenylacrylamide **12q** as a white powder (4.64 g, 36%).

<sup>1</sup>H NMR (600 MHz, CDCl<sub>3</sub>) δ 7.85 (s, 1H), 7.79 (s, 1H), 7.37 – 7.33 (m, 7H), 7.20 – 7.17 (m, 1H), 7.14 – 7.12 (m, 4H), 6.99 – 6.97 (s, 2H), 4.96 (s, 2H).

<sup>13</sup>C NMR (150 MHz, CDCl<sub>3</sub>) δ 165.1, 138.0, 135.1, 135.0, 134.6, 131.9, 130.6, 129.7, 129.7, 129.5, 129.0, 128.9, 128.8, 128.7, 128.4, 78.3.

HRMS: Calculated [M+H]<sup>+</sup> for C<sub>22</sub>H<sub>20</sub>NO<sub>2</sub><sup>+</sup>: 330.1489, found: 330.1492.

Melting Point: 106.7 – 108.8 °C

FTIR (cm<sup>-1</sup>): 3131, 3058, 3026, 2934, 1651, 1614, 1495, 146, 1370, 1282, 1083, 1064, 754, 689.

### (*E*)-*N*-(benzyloxy)-2-(4-nitrophenyl)-3-phenylacrylamide (**12r**)

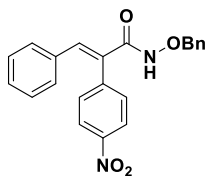

Following **Method A** from the general procedures for the synthesis of hydroxamate esters, in an oven-dried round-bottom flask under Argon atmosphere, BnONH<sub>2</sub>·HCl (543 mg, 1.0 equiv.) was suspended in THF:DCM (20 mL, 1:1, 0.2 M) at room temperature. The reaction mixture was cooled down to 0 °C using a water-ice bath. NEt<sub>3</sub> (0.8 mL, 1.5 equiv.) was added, and the reaction mixture was allowed to stir for



30 min at 0 °C. HOBt hydrate (568 mg, 1.0 equiv.) and compound **13r** (1.0 g, 1.0 equiv.) were added subsequently, and the reaction was allowed to stir for an additional 30 min at 0 °C. Finally, NEt<sub>3</sub> (0.8 mL, 1.5 equiv.) were added, reaction was allowed to warm up to room temperature and it was allowed to stir overnight. The reaction was then filtered, and the obtained filtrate was diluted with 20 mL of EtOAc and then washed once with 20 mL HCl (3 M), followed by one wash with 20 mL conc. NaHCO<sub>3</sub> and finally with 20 mL H<sub>2</sub>O. The combined organic layers were dried over Na<sub>2</sub>SO<sub>4</sub> and concentrated *in vacuo*. The crude reaction mixture was purified by column chromatography on silica gel (50/50 hexanes:EtOAc) to afford (*E*)-*N*-(benzyloxy)-2-(4-nitrophenyl)-3-phenylacrylamide **12r** as a white powder (1.3 g, 94%).

<sup>1</sup>H NMR (600 MHz, CDCl<sub>3</sub>) δ 8.17 (d, *J* = 8.8 Hz, 2H), 7.81 (s, 1H), 7.69 (s, 1H), 7.37 (m, 5H), 7.32 (d, *J* = 8.8 Hz, 2H), 7.25 – 7.22 (m, 1H), 7.18 – 7.16 (m, 2H), 6.95 – 6.94 (m, 2H), 4.97 (s, 2H).

<sup>13</sup>C NMR (150 MHz, CDCl<sub>3</sub>) δ 164.4, 148.0, 142.2, 139.5, 134.9, 137.7, 131.1, 130.5, 130.4, 129.7, 129.5, 129.2, 128.9, 128.7, 128.6, 128.5, 124.6, 78.4.

HRMS: Calculated [M+H]<sup>+</sup> for C<sub>22</sub>H<sub>19</sub>N<sub>2</sub>O<sub>4</sub><sup>+</sup>: 330.1489, found: 330.1492.

Melting Point: 126.2 – 130.6 °C

FTIR (cm<sup>-1</sup>): 3244, 3070, 2932, 1664, 1618, 1593, 1514, 1446, 1340, 1047, 750, 693.

#### (*E*)-*N*-(benzyloxy)-3-(pyridin-2-yl)but-2-enamide (**12s**)

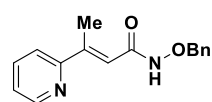

Following **Method B** from the general procedures for the synthesis of hydroxamate esters, in a flame-dried round-bottom flask under Argon atmosphere, BnONH<sub>2</sub>·HCl (3.6 g, 22.57 mmol, 2.0 equiv.) was suspended in dry Toluene (56 mL, 0.2 M). The reaction mixture was then cooled down to –40 °C using an acetone cooling bath. Then a solution of AlMe<sub>3</sub> (11.3 mL, 2M in toluene, 2.0 equiv.) was added dropwise avoiding a spike in temperature greater than 20 °C. After the addition was done, compound **13s** (2.0 g, 11.3 mmol, 1.0 equiv.) was added, the reaction was allowed to warm to room temperature, and it was allowed to stir overnight. The reaction was then quenched with 3M HCl until gas evolution ceased. The reaction mixture was then partitioned with 60 mL H<sub>2</sub>O and extracted three times with 60 mL EtOAc. The combined organic layers were dried over Na<sub>2</sub>SO<sub>4</sub> and concentrated *in vacuo*. The crude reaction mixture was purified by column chromatography on silica gel (50/50 hexanes:EtOAc) to afford (*E*)-*N*-(benzyloxy)-3-(pyridin-2-yl)but-2-enamide **12s** as a white powder (1.17 g, 77%).

<sup>1</sup>H NMR (600 MHz, DMSO-*d*<sub>6</sub>) δ 11.31 (s, 1H), 8.60 (d, *J* = 4.1 Hz, 1H), 7.85 (td, *J* = 7.7, 1.9 Hz, 1H), 7.63 (d, *J* = 8.0 Hz, 1H), 7.44 – 7.34 (m, 6H), 6.71 (s, 1H), 4.87 (s, 2H), 2.52 (s, 3H).

<sup>13</sup>C NMR (150 MHz, DMSO-*d*<sub>6</sub>) δ 164.0, 156.8, 149.0, 147.6, 137.2, 136.1, 128.8, 128.3, 128.2, 123.7, 120.6, 118.5, 76.9, 15.0.

HRMS: Calculated [M+H]<sup>+</sup> for C<sub>15</sub>H<sub>17</sub>N<sub>2</sub>O<sub>2</sub><sup>+</sup>: 269.1285, found: 269.1290.

Melting Point: 65.4 – 69.8 °C

#### (*E*)-*N*-(benzyloxy)-3-(pyridin-3-yl)but-2-enamide (**12t**)

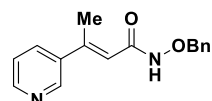

Following **Method B** from the general procedures for the synthesis of hydroxamate esters, in a flame-dried round-bottom flask under Argon atmosphere, BnONH<sub>2</sub>·HCl (1.92 g, 12.0 mmol, 2.0 equiv.) was suspended in dry Toluene (30 mL, 0.2 M). The

reaction mixture was then cooled down to  $-40\text{ }^{\circ}\text{C}$  using an acetone cooling bath. Then a solution of  $\text{AlMe}_3$  (6 mL, 2M in toluene, 2.0 equiv.) was added dropwise avoiding a spike in temperature greater than  $20\text{ }^{\circ}\text{C}$ . After the addition was done, compound **13t** (1.06 g, 6.0 mmol, 1.0 equiv.) was added, the reaction was allowed to warm to room temperature, and it was allowed to stir overnight. The reaction was then quenched with 3M HCl until gas evolution ceased. The reaction mixture was then partitioned with 30 mL  $\text{H}_2\text{O}$  and extracted three times with 30 mL EtOAc. The combined organic layers were dried over  $\text{Na}_2\text{SO}_4$  and concentrated *in vacuo*. The crude reaction mixture was purified by column chromatography on silica gel (50/50 hexanes:EtOAc) to afford (*E*)-*N*-(benzyloxy)-3-(pyridin-3-yl)but-2-enamide **12t** as a white powder (790 mg, 49%).

$^1\text{H NMR}$  (600 MHz,  $\text{DMSO-d}_6$ )  $\delta$  11.18 (s, 1H), 8.69 (d,  $J = 2.4$  Hz, 1H), 8.56 (dd,  $J = 4.7, 1.6$  Hz, 1H), 7.88 (dt,  $J = 8.1, 2.1$  Hz, 1H), 7.44 – 7.34 (m, 6H), 6.06 (s, 1H), 4.87 (s, 2H), 2.50 (s, 3H).

$^{13}\text{C NMR}$  (150 MHz,  $\text{DMSO-d}_6$ )  $\delta$  163.7, 149.6, 146.9, 137.3, 136.1, 133.5, 128.8, 128.3, 128.3, 118.1, 77.0, 16.6.

**HRMS:** Calculated  $[\text{M}+\text{H}]^+$  for  $\text{C}_{15}\text{H}_{17}\text{N}_2\text{O}_2^+$ : 269.1285, found: 269.1292.

**Melting Point:** 121.3 – 122.1  $^{\circ}\text{C}$

**FTIR** ( $\text{cm}^{-1}$ ): 3142, 2931, 2874, 1675, 1633, 1527, 1454, 1356, 1204, 1052, 943, 863, 752, 699.

#### (*E*)-*N*-(benzyloxy)-3,3-diphenylacrylamide (**12u**)

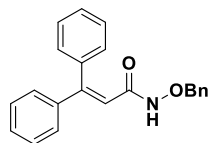

Following **Method A** from the general procedures for the synthesis of hydroxamate esters, in an oven-dried round-bottom flask under Argon atmosphere,  $\text{BnONH}_2\cdot\text{HCl}$  (6.38 g, 1.0 equiv.) was suspended in THF:DCM (200 mL, 1:1, 0.2 M) at room temperature. The reaction mixture was cooled down to  $0\text{ }^{\circ}\text{C}$  using a water-ice bath.  $\text{NEt}_3$  (8.4 mL, 1.5 equiv.) was added, and the reaction mixture was allowed to stir for 60 min at  $0\text{ }^{\circ}\text{C}$ . HOBt hydrate (6.12 g, 1.0 equiv.) and  $\beta$ -phenyl cinnamic acid **13u** (8.96 g, 1.0 equiv.) were added subsequently, and the reaction was allowed to stir for an additional 60 min at  $0\text{ }^{\circ}\text{C}$ . Finally,  $\text{NEt}_3$  (8.4 mL, 1.5 equiv.) were added, reaction was allowed to warm up to room temperature and it was allowed to stir for 48 h. The reaction was then filtered, and the obtained filtrate was diluted with 100 mL of EtOAc and then washed once with 100 mL HCl (3 M), followed by one wash with 100 mL conc.  $\text{NaHCO}_3$  and finally with 100 mL  $\text{H}_2\text{O}$ . The combined organic layers were dried over  $\text{Na}_2\text{SO}_4$  and concentrated *in vacuo*. The crude reaction mixture was purified by column chromatography on silica gel (80/20 hexanes:EtOAc) to afford (*E*)-*N*-(benzyloxy)-3,3-diphenylacrylamide **12u** as a white powder (4.64 g, 35%). The NMR data is in agreement with the one reported in the literature.<sup>10</sup>

$^1\text{H NMR}$  (600 MHz,  $\text{CDCl}_3$ )  $\delta$  7.85 (s, 1H), 7.78 (bs, 1H), 7.36 – 7.34 (m, 8H), 7.20 – 7.17 (m, 1H), 7.14 – 7.12 (m, 4H), 6.99 – 6.97 (m, 2H), 4.96 (s, 2H).

<sup>10</sup> Ghosh, S., Chattopadhyay, S. K. *Adv. Synth. Catal.* **2019**, *361*, 4727–4738.

### (E)-N-(benzyloxy)-3-methyl-phenylacrylamide (**12v**)

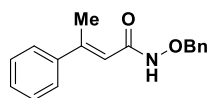

Following **Method B** from the general procedures for the synthesis of hydroxamate esters, in a flame-dried round-bottom flask under Argon atmosphere, BnONH<sub>2</sub>·HCl (1.81 g, 11.3 mmol, 2.0 equiv.) was suspended in dry Toluene (30 mL, 0.2 M). The reaction mixture was then cooled down to -40 °C using an acetone cooling bath. Then a solution of AlMe<sub>3</sub> (5.7 mL, 2M in toluene, 2.0 equiv.) was added dropwise avoiding a spike in temperature greater than 20 °C. After the addition was done, methyl β-methyl cinnamate **13v** (1.0 g, 5.67 mmol, 1.0 equiv.) was added, the reaction was allowed to warm to room temperature, and it was allowed to stir overnight. The reaction was then quenched with 3M HCl until gas evolution ceased. The reaction mixture was then partitioned with 30 mL H<sub>2</sub>O and extracted three times with 30 mL EtOAc. The combined organic layers were dried over Na<sub>2</sub>SO<sub>4</sub> and concentrated *in vacuo*. The crude reaction mixture was purified by column chromatography on silica gel (50/50 hexanes:EtOAc) to afford (E)-N-(benzyloxy)-3-methyl-3-phenylacrylamide **12v** as a white powder (1.11 g, 73%).

<sup>1</sup>H NMR (600 MHz, DMSO-d<sub>6</sub>) δ 11.13 (s, 1H), 7.49 – 7.48 (m, 2H), 7.44 – 7.35 (m, 8H), 6.01 (s, 1H), 4.987 (s, 2H), 2.50 (s, 3H).

<sup>13</sup>C NMR (150 MHz, DMSO-d<sub>6</sub>) δ 164.1, 149.9, 141.9, 136.1, 128.8, 128.7, 128.6, 128.3, 128.2, 125.9, 116.7, 77.0, 16.9.

HRMS: Calculated [M+H]<sup>+</sup> for C<sub>17</sub>H<sub>18</sub>NO<sub>2</sub><sup>+</sup>: 268.1338, found: 268.1340.

Melting Point: 68.7 – 71.0 °C

FTIR (cm<sup>-1</sup>): 3086, 3062, 3035, 2955, 1639, 1610, 1510, 1493, 1384, 1274, 1058, 969, 745, 688.

### N-(benzyloxy)-3-methyl-but-2-enamide (**12w**)

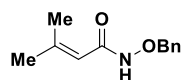

Following **Method B** from the general procedures for the synthesis of hydroxamate esters, in a flame-dried round-bottom flask under Argon atmosphere, BnONH<sub>2</sub>·HCl (4.6 g, 28.8 mmol, 2.0 equiv.) was suspended in dry Toluene (72 mL, 0.2 M). The reaction mixture was then cooled down to -40 °C using an acetone cooling bath. Then a solution of AlMe<sub>3</sub> (14.4 mL, 2M in toluene, 2.0 equiv.) was added dropwise avoiding a spike in temperature greater than 20 °C. After the addition was done, compound **13w** (1.84 g, 14.4 mmol, 1.0 equiv.) was added, the reaction was allowed to warm to room temperature, and it was allowed to stir overnight. The reaction was then quenched with 3M HCl until gas evolution ceased. The reaction mixture was then partitioned with 60 mL H<sub>2</sub>O and extracted three times with 60 mL EtOAc. The combined organic layers were dried over Na<sub>2</sub>SO<sub>4</sub> and concentrated *in vacuo*. The crude reaction mixture was purified by column chromatography on silica gel (70/30 hexanes:EtOAc) to afford N-(benzyloxy)-3-methyl-3-but-2-enamide **12w** as a white powder (1.115 g, 38%).

<sup>1</sup>H NMR (600 MHz, DMSO-d<sub>6</sub>) δ 10.88 (s, 1H), 7.40 – 7.33 (m, 5H), 5.45 (s, 1H), 4.79 (s, 2H), 2.08 (s, 3H), 1.79 (s, 3H).

<sup>13</sup>C NMR (150 MHz, DMSO-d<sub>6</sub>) δ 164.2, 150.7, 136.2, 128.7, 128.3, 128.2, 115.1, 76.9, 26.9, 19.5

HRMS: Calculated [M+H]<sup>+</sup> for C<sub>12</sub>H<sub>16</sub>NO<sub>2</sub><sup>+</sup>: 206.1176, found: 206.1185.

Melting Point: 71.8 – 73.2 °C

FTIR (cm<sup>-1</sup>): 3194, 2974, 2938, 1637, 1496, 1453, 1360, 1250, 1026, 745, 696.

### Methyl 3-((benzyloxy)amino)-3-oxopropanoate (**12'**)

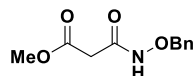

Following **Method A** from the general procedures for the synthesis of hydroxamate esters, in an oven-dried round-bottom flask under Argon atmosphere, BnONH<sub>2</sub>·HCl (6.76 g, 1.0 equiv.) was suspended in THF:DCM (212 mL, 1:1, 0.2 M) at room temperature. The reaction mixture was cooled down to 0 °C using a water-ice bath. NEt<sub>3</sub> (9.0 mL, 1.5 equiv.) was added, and the reaction mixture was allowed to stir for 30 min at 0 °C. HOBt hydrate (6.76 g, 1.0 equiv.) and compound **13'** (5 g, 1.0 equiv.) were added subsequently, and the reaction was allowed to stir for an additional 30 min at 0 °C. Finally, NEt<sub>3</sub> (9.0 mL, 1.5 equiv.) were added, reaction was allowed to warm up to room temperature and it was allowed to stir overnight. The reaction was then filtered, and the obtained filtrate was diluted with 150 mL of EtOAc and then washed once with 100 mL HCl (3 M), followed by one wash with 100 mL conc. NaHCO<sub>3</sub> and finally with 100 mL H<sub>2</sub>O. The combined organic layers were dried over Na<sub>2</sub>SO<sub>4</sub> and concentrated *in vacuo*. The crude reaction mixture was purified by column chromatography on silica gel (50/50 hexanes:EtOAc) to afford methyl 3-((benzyloxy)amino)-3-oxopropanoate **12'** as a white powder (6.16 g, 65%).

<sup>1</sup>H NMR (600 MHz, DMSO-d<sub>6</sub>) δ 11.24 (s, 1H), 7.40 – 7.35 (m, 5H), 4.80 (s, 2H), 3.63 (s, 3H), 3.14 (s, 2H).

<sup>13</sup>C NMR (150 MHz, DMSO-d<sub>6</sub>) δ 167.8, 162.3, 135.8, 128.9, 128.3, 76.9, 52.0

HRMS: Calculated [M+H]<sup>+</sup> for C<sub>11</sub>H<sub>14</sub>NO<sub>4</sub><sup>+</sup>: 224.0917, found: 224.0921.

Melting Point: 81.6 – 82.6 °C

FTIR (cm<sup>-1</sup>): 3149, 2995, 2941, 2850, 1736, 1649, 1532, 1432, 1346, 1309, 1197, 1170, 1061, 1009, 950, 795, 725, 685.

### Methyl (*E*)-(2-(benzyloxy)carbamoyl)-3-phenylacrylate (**12x**)

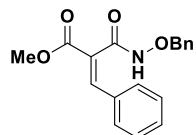

In a flame-dried round-bottom flask under Argon atmosphere, compound **12'** (2.0 g, 8.96 mmol) was dissolved in dry THF (30 mL, 0.3M). The reaction was cooled down to 0 °C using a water cooling bath. TiCl<sub>4</sub> neat (1.14 mL, 1.20 equiv.) was then added dropwise and was left stirring for 30 at the same temperature. Then, benzaldehyde (0.91 mL, 1.0 equiv.) was added, followed by *N*-methyl morpholine (2.96 mL, 3.0 equiv.). The reaction was allowed to slowly warm up to room temperature, and it was allowed to stir overnight. After completion, the reaction was quenched with 30 mL H<sub>2</sub>O and extracted three times with 40 mL EtOAc. The combined organic layers were dried over Na<sub>2</sub>SO<sub>4</sub> and concentrated *in vacuo*. The crude reaction mixture was purified by column chromatography on silica gel (50/50 hexanes:EtOAc) to afford methyl (*E*)-(2-(benzyloxy)carbamoyl)-3-phenylacrylate **12x** as a white powder (1.21 g, 43%).

<sup>1</sup>H NMR (600 MHz, DMSO-d<sub>6</sub>) δ 11.58 (s, 1H), 7.70 (s, 1H), 7.63 – 7.61 (m, 2H), 7.46 – 7.42 (m, 3H), 7.37 – 7.35 (m, 5H), 4.85 (s, 2H), 3.76 (s, 3H).

<sup>13</sup>C NMR (150 MHz, DMSO-d<sub>6</sub>) δ 164.8, 162.3, 142.2, 135.8, 132.7, 13.08, 129.9, 128.9, 128.9, 128.3, 128.3, 126.2, 79.2, 76.5, 52.4.

HRMS: Calculated [M+H]<sup>+</sup> for C<sub>18</sub>H<sub>18</sub>NO<sub>4</sub><sup>+</sup>: 268.1338, found: 268.1340.

Melting Point: 99.5 – 100.7 °C

FTIR (cm<sup>-1</sup>): 3218, 2950, 1732, 1651, 1626, 1496, 1449, 1433, 1263, 1199, 1027, 768, 752, 689.

### Methyl (*E*)-(2-(benzyloxy)carbamoyl)-3-(4-methoxyphenyl)acrylate (**12y**)

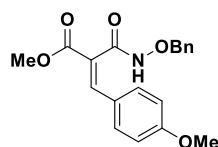

In a flame-dried round-bottom flask under Argon atmosphere, compound **12'** (2.0 g, 8.96 mmol) was dissolved in dry THF (30 mL, 0.3M). The reaction was cooled down to 0 °C using a water cooling bath. TiCl<sub>4</sub> neat (1.14 mL, 1.20 equiv.) was then added dropwise and was left stirring for 30 at the same temperature. Then, *p*-anisaldehyde (1.09 mL, 1.0 equiv.) was added, followed by *N*-methyl morpholine (2.96 mL, 3.0 equiv.). The reaction was allowed to slowly warm up to room temperature, and it was allowed to stir overnight. After completion, the reaction was quenched with 30 mL H<sub>2</sub>O and extracted three times with 40 mL EtOAc. The combined organic layers were dried over Na<sub>2</sub>SO<sub>4</sub> and concentrated *in vacuo*. The crude reaction mixture was purified by column chromatography on silica gel (50/50 hexanes:EtOAc) to afford methyl (*E*)-(2-(benzyloxy)carbamoyl)-3-(4-methoxyphenyl)acrylate **12y** as a white powder (1.442 g, 36%).

<sup>1</sup>H NMR (600 MHz, DMSO-*d*<sub>6</sub>) δ 11.56 (s, 1H), 7.63 (s, 1H), 7.59 (d, *J* = 8.8 Hz, 2H), 7.42 – 7.35 (m, 5H), 6.99 (d, *J* = 8.8 Hz, 2H), 4.88 (s, 2H), 3.79 (s, 3H), 3.73 (s, 3H).

<sup>13</sup>C NMR (150 MHz, DMSO-*d*<sub>6</sub>) δ 165.1, 162.8, 161.3, 142.0, 135.9, 132.0, 128.8, 128.8, 128.3, 125.1, 123.3, 114.4, 76.5, 55.4, 52.2.

HRMS: Calculated [M+H]<sup>+</sup> for C<sub>19</sub>H<sub>20</sub>NO<sub>5</sub><sup>+</sup>: 342.1336, found: 342.1345.

Melting Point: 95.6 – 96.2 °C

FTIR (cm<sup>-1</sup>): 3122, 2956, 2883, 1715, 1637, 1603, 1514, 1267, 1247, 1201, 1175, 1090, 1013, 828, 693.

### Methyl 2-((benzyloxy)carbamoyl)-3-ethylpent-2-enoate (**12z**)

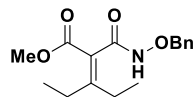

In a flame-dried round-bottom flask under Argon atmosphere, compound **12'** (2.0 g, 8.96 mmol) was dissolved in dry THF (30 mL, 0.3M). The reaction was cooled down to 0 °C using a water cooling bath. TiCl<sub>4</sub> neat (1.14 mL, 1.20 equiv.) was then added dropwise and was left stirring for 30 at the same temperature. Then, 3-pentanone (0.95 mL, 1.0 equiv.) was added, followed by *N*-methyl morpholine (2.96 mL, 3.0 equiv.). The reaction was allowed to slowly warm up to room temperature, and it was allowed to stir overnight. After completion, the reaction was quenched with 30 mL H<sub>2</sub>O and extracted three times with 40 mL EtOAc. The combined organic layers were dried over Na<sub>2</sub>SO<sub>4</sub> and concentrated *in vacuo*. The crude reaction mixture was purified by column chromatography on silica gel (50/50 hexanes:EtOAc) to afford methyl 2-((benzyloxy)carbamoyl)-3-ethylpent-2-enoate **12z** as a white powder (1.027 g, 39%).

<sup>1</sup>H NMR (600 MHz, DMSO-*d*<sub>6</sub>) δ 11.24 (s, 1H), 7.42 – 7.34 (m, 5H), 4.84 (s, 2H), 3.63 (s, 3H), 2.49 – 2.46 (m, 2H), 2.06 (q, *J* = 7.5 Hz, 2H), 1.00 (t, *J* = 7.5 Hz, 3H), 0.95 (t, *J* = 7.5 Hz, 3H).

<sup>13</sup>C NMR (150 MHz, DMSO-*d*<sub>6</sub>) δ 164.8, 164.2, 163.2, 136.1, 128.7, 128.2, 128.2, 123.3, 76.4, 51.4, 27.6, 24.4, 12.7, 12.6.

HRMS: Calculated [M+H]<sup>+</sup> for C<sub>16</sub>H<sub>22</sub>NO<sub>4</sub><sup>+</sup>: 292.1543, found: 292.1552.

Melting Point: 70.7 – 80.7 °C

FTIR (cm<sup>-1</sup>): 3167, 2974, 2879, 1715, 1635, 1606, 1501, 1431, 1268, 1229, 1094, 1020, 1000, 751, 695.

### Methyl 3-((benzyloxy)amino)-2-cyclohexylidene-3-oxopropanoate (**12aa**)

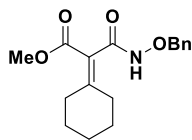

In a flame-dried round-bottom flask under Argon atmosphere, compound **12'** (2.0 g, 8.96 mmol) was dissolved in dry THF (30 mL, 0.3M). The reaction was cooled down to 0 °C using a water cooling bath. TiCl<sub>4</sub> neat (1.14 mL, 1.20 equiv.) was then added dropwise and was left stirring for 30 at the same temperature. Then, cyclohexanone (0.93 mL, 1.0 equiv.) was added, followed by *N*-methyl morpholine (2.96 mL, 3.0 equiv.). The reaction was allowed to slowly warm up to room temperature, and it was allowed to stir overnight. After completion, the reaction was quenched with 30 mL H<sub>2</sub>O and extracted three times with 40 mL EtOAc. The combined organic layers were dried over Na<sub>2</sub>SO<sub>4</sub> and concentrated *in vacuo*. The crude reaction mixture was purified by column chromatography on silica gel (50/50 hexanes:EtOAc) to afford methyl 2-((benzyloxy)carbamoyl)-3-ethylpent-2-enoate **12aa** as a white powder (1.478 g, 54%).

<sup>1</sup>H NMR (600 MHz, DMSO-*d*<sub>6</sub>) δ 11.24 (s, 1H), 7.40 – 7.34 (m, 5H), 4.83 (s, 2H), 3.62 (s, 3H), 2.68 – 2.66 (m, 2H), 2.10 (s, 2H), 1.56 – 1.53 (m, 6H).

<sup>13</sup>C NMR (150 MHz, DMSO-*d*<sub>6</sub>) δ 164.6, 12.9, 161.0, 136.1, 128.8, 128.2, 128.2, 121.3, 76.4, 51.5, 40.1, 33.5, 30.3, 27.9, 27.7, 25.4.

HRMS: Calculated [M+H]<sup>+</sup> for C<sub>17</sub>H<sub>22</sub>NO<sub>4</sub><sup>+</sup>: 304.1543, found: 304.1548.

FTIR (cm<sup>-1</sup>): 3176, 2932, 2856, 1719, 1650, 1452, 1433, 1266, 1204, 1095, 1024, 746, 697.

### *N*-(benzyloxy)-3-methyl-1*H*-indene-2-carboxamide (**12ab**)

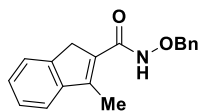

Following **Method B** from the general procedures for the synthesis of hydroxamate esters, in an oven-dried round-bottom flask under Argon atmosphere, BnONH<sub>2</sub>·HCl (916 mg, 1.0 equiv.) was suspended in THF:DCM (29 mL, 1:1, 0.2 M) at room temperature. The reaction mixture was cooled down to 0 °C using a water-ice bath. NEt<sub>3</sub> (1.2 mL, 1.5 equiv.) was added, and the reaction mixture was allowed to stir for 30 min at 0 °C. HOBt hydrate (879 mg, 1.0 equiv.) and compound **13ab** (1.0 g, 5.74 mmol, 1.0 equiv.) were added subsequently, and the reaction was allowed to stir for an additional 30 min at 0 °C. Finally, NEt<sub>3</sub> (1.2 mL, 1.5 equiv.) were added, reaction was allowed to warm up to room temperature and it was allowed to stir overnight. The reaction was then filtered, and the obtained filtrate was diluted with 30 mL of EtOAc and then washed once with 20 mL HCl (3 M), followed by one wash with 20 mL conc. NaHCO<sub>3</sub> and finally with 20 mL H<sub>2</sub>O. The combined organic layers were dried over Na<sub>2</sub>SO<sub>4</sub> and concentrated *in vacuo*. The crude reaction mixture was purified by column chromatography on silica gel (70/30 hexanes:EtOAc) to afford *N*-(benzyloxy)-3-methyl-1*H*-indene-2-carboxamide **12ab** as a white powder (1.03 g, 64%).

<sup>1</sup>H NMR (600 MHz, CDCl<sub>3</sub>) δ 8.62(s, 1H), 7.44 – 7.31 (m, 9H), 5.01 (s, 2H), 3.47 (s, 2H), 2.45 (s, 3H).

<sup>13</sup>C NMR (150 MHz, CDCl<sub>3</sub>) δ 165.5, 148.6, 145.1, 142.3, 135.5, 129.4, 129.3, 128.7, 128.6, 127.4, 126.8, 123.9, 120.8, 78.4, 37.9, 12.4

HRMS: Calculated [M+H]<sup>+</sup> for C<sub>18</sub>H<sub>18</sub>NO<sub>2</sub><sup>+</sup>: 280.1332, found: 280.1338.

Melting Point: 143.1 – 145.1 °C

FTIR (cm<sup>-1</sup>): 3178, 2033, 2949, 1631, 1495, 1351, 1267, 1008, 899, 754, 717, 696.

### **tert-butyl-3-((benzyloxy)carbamoyl)-1H-indole-1-carboxylate (12ac)**

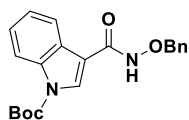

Following **Method B** from the general procedures for the synthesis of hydroxamate esters, in an oven-dried round-bottom flask under Argon atmosphere, BnONH<sub>2</sub>·HCl (611 mg, 1.0 equiv.) was suspended in THF:DCM (20 mL, 1:1, 0.2 M) at room temperature. The reaction mixture was cooled down to 0 °C using a water-ice bath. NEt<sub>3</sub> (0.8 mL, 1.5 equiv.) was added, and the reaction mixture was allowed to stir for 30 min at 0 °C. HOBt hydrate (586 mg, 1.0 equiv.) and compound **13ac** (1.0 g, 5.74 mmol, 1.0 equiv.) were added subsequently, and the reaction was allowed to stir for an additional 30 min at 0 °C. Finally, NEt<sub>3</sub> (0.8 mL, 1.5 equiv.) were added, reaction was allowed to warm up to room temperature and it was allowed to stir overnight. The reaction was then filtered, and the obtained filtrate was diluted with 30 mL of EtOAc and then washed once with 20 mL HCl (3 M), followed by one wash with 20 mL conc. NaHCO<sub>3</sub> and finally with 20 mL H<sub>2</sub>O. The combined organic layers were dried over Na<sub>2</sub>SO<sub>4</sub> and concentrated *in vacuo*. The crude reaction mixture was purified by column chromatography on silica gel (70/30 hexanes:EtOAc) to afford *tert*-butyl-3-((benzyloxy)carbamoyl)-1H-indole-1-carboxylate **12ac** as a white powder (675 mg, 48%).

<sup>1</sup>H NMR (600 MHz, CDCl<sub>3</sub>) δ 8.23 (s, 1H), 8.17 (d, *J* = 8.4 Hz, 1H), 8.08 (s, 1H), 7.90 (d, *J* = 7.9 Hz, 1H), 7.48 – 7.47 (m, 2H), 7.43 – 7.38 (m, 4H), 7.31 – 7.29 (m, 1H), 5.07 (m, 2H), 1.67 (m, 9H).

<sup>13</sup>C NMR (150 MHz, CDCl<sub>3</sub>) δ 164.0, 149.1, 135.3, 135.3, 129.3, 128.8, 128.7, 128.6, 128.6, 127.5, 125.3, 123.9, 121.3, 115.2, 112.7, 78.6, 28.1.

HRMS: Calculated [M+H]<sup>+</sup> for C<sub>21</sub>H<sub>23</sub>N<sub>2</sub>O<sub>4</sub><sup>+</sup>: 367.1658, found: 367.1665.

Melting Point: 52.6 – 58.7 °C

FTIR (cm<sup>-1</sup>): 3145, 2979, 2935, 1739, 1641, 1450, 1248, 1217, 1147, 1081, 838, 744, 695.

### **N-(benzyloxy)-2-cycloheptylideneacetamide (12ad)**

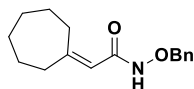

Following **Method B** from the general procedures for the synthesis of hydroxamate esters, in a flame-dried round-bottom flask under Argon atmosphere, BnONH<sub>2</sub>·HCl (2.164 g, 13.56 mmol, 2.0 equiv.) was suspended in dry Toluene (34 mL, 0.2 M). The reaction mixture was then cooled down to –40 °C using an acetone cooling bath. Then a solution of AlMe<sub>3</sub> (6.8 mL, 2M in toluene, 2.0 equiv.) was added dropwise avoiding a spike in temperature greater than 20 °C. After the addition was done, compound **13ad** (1.6 g, 6.78 mmol, 1.0 equiv.) was added, the reaction was allowed to warm to room temperature, and it was allowed to stir overnight. The reaction was then quenched with 3M HCl until gas evolution ceased. The reaction mixture was then partitioned with 30 mL H<sub>2</sub>O and extracted three times with 30 mL EtOAc. The combined organic layers were dried over Na<sub>2</sub>SO<sub>4</sub> and concentrated *in vacuo*. The crude reaction mixture was purified by column chromatography on silica gel (70/30 hexanes:EtOAc) to afford *N*-(benzyloxy)-2-cycloheptylideneacetamide **12ad** as a colorless oil (1.7 mg, 94%).

<sup>1</sup>H NMR (600 MHz, DMSO-*d*<sub>6</sub>) δ 10.66 (bs, 1H), 7.41 – 7.32 (m, 5H), 5.51 (bs, 1H), 4.80 (s, 2H), 2.81 – 2.79 (m, 2H), 2.29 – 2.27 (m, 2H), 1.62 – 1.57 (m, 4H), 1.51 – 1.48 (m, 4H).

<sup>13</sup>C NMR (150 MHz, DMSO-*d*<sub>6</sub>) δ 164.2, 160.3, 136.2, 128.7, 128.3, 128.1, 114.8, 76.8, 38.3, 30.9, 29.3, 27.5, 26.4.

HRMS: Calculated [M+H]<sup>+</sup> for C<sub>16</sub>H<sub>22</sub>NO<sub>2</sub><sup>+</sup>: 260.1645, found: 260.1651.

FTIR (cm<sup>-1</sup>): 3181, 2922, 2852, 1650, 1630, 1496, 1453, 1051, 736.

### ***N*-(benzyloxy)-2-cyclohexylideneacetamide (12ae)**

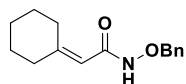

Following **Method B** from the general procedures for the synthesis of hydroxamate esters, in a flame-dried round-bottom flask under Argon atmosphere, BnONH<sub>2</sub>·HCl (1.24 g, 7.78 mmol, 2.0 equiv.) was suspended in dry Toluene (20 mL, 0.2 M). The reaction mixture was then cooled down to -40 °C using an acetone cooling bath. Then a solution of AlMe<sub>3</sub> (3.9 mL, 2M in toluene, 2.0 equiv.) was added dropwise avoiding a spike in temperature greater than 20 °C. After the addition was done, compound **13ae** (600 mg, 6.78 mmol, 1.0 equiv.) was added, the reaction was allowed to warm to room temperature, and it was allowed to stir overnight. The reaction was then quenched with 3M HCl until gas evolution ceased. The reaction mixture was then partitioned with 30 mL H<sub>2</sub>O and extracted three times with 30 mL EtOAc. The combined organic layers were dried over Na<sub>2</sub>SO<sub>4</sub> and concentrated *in vacuo*. The crude reaction mixture was purified by column chromatography on silica gel (70/30 hexanes:EtOAc) to afford *N*-(benzyloxy)-2-cyclohexylideneacetamide **12ae** as white powder (750 mg, 79%).

<sup>1</sup>H NMR (600 MHz, DMSO-d<sub>6</sub>) δ 10.91 (s, 1H), 7.40 – 7.34 (m, 5H), 5.38 (s, 1H), 4.79 (m, 2H), 2.76 (t, *J* = 5.8 Hz, 2H), 2.10 (t, *J* = 5.8 Hz, 2H), 1.58 – 1.50 (m, 6H).

<sup>13</sup>C NMR (150 MHz, DMSO-d<sub>6</sub>) δ 164.2, 157.6, 136.2, 128.7, 128.3, 128.2, 112.4, 76.8, 37.2, 28.9, 28.1, 27.3, 25.8.

HRMS: Calculated [M+H]<sup>+</sup> for C<sub>15</sub>H<sub>20</sub>NO<sub>2</sub><sup>+</sup>: 246.1489, found: 246.1495.

Melting Point: 71.9 – 73.5 °C

FTIR (cm<sup>-1</sup>): 3174, 2992, 2930, 2853, 1636, 1524, 1446, 1229, 1047, 980, 840, 751, 699.

### ***N*-(benzyloxy)-2-cyclopentylideneacetamide (12af)**

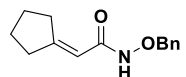

Following **Method B** from the general procedures for the synthesis of hydroxamate esters, in a flame-dried round-bottom flask under Argon atmosphere, BnONH<sub>2</sub>·HCl (2.28 g, 14.27 mmol, 2.0 equiv.) was suspended in dry Toluene (36 mL, 0.2 M). The reaction mixture was then cooled down to -40 °C using an acetone cooling bath. Then a solution of AlMe<sub>3</sub> (7.13 mL, 2M in toluene, 2.0 equiv.) was added dropwise avoiding a spike in temperature greater than 20 °C. After the addition was done, compound **13af** (1.0 g, 7.13 mmol, 1.0 equiv.) was added, the reaction was allowed to warm to room temperature, and it was allowed to stir overnight. The reaction was then quenched with 3M HCl until gas evolution ceased. The reaction mixture was then partitioned with 35 mL H<sub>2</sub>O and extracted three times with 35 mL EtOAc. The combined organic layers were dried over Na<sub>2</sub>SO<sub>4</sub> and concentrated *in vacuo*. The crude reaction mixture was purified by column chromatography on silica gel (70/30 hexanes:EtOAc) to afford *N*-(benzyloxy)-2-cyclopentylideneacetamide **12af** as white powder (1.38 g, 84%).

<sup>1</sup>H NMR (600 MHz, DMSO-d<sub>6</sub>) δ 10.63 (bs, 1H), 7.41 – 7.33 (m, 5H), 5.67 (bs, 1H), 4.80 (m, 2H), 2.71 – 2.68 (m, 2H), 2.37 – 2.34 (m, 2H), 1.67 (p, *J* = 7.0 Hz, 2H), 1.59 (q, *J* = 7.2 Hz, 2H).

<sup>13</sup>C NMR (150 MHz, DMSO-d<sub>6</sub>) δ 164.2, 162.7, 136.2, 128.7, 128.3, 128.2, 110.5, 76.9, 35.1, 31.7, 26.1, 24.9.

HRMS: Calculated [M+H]<sup>+</sup> for C<sub>14</sub>H<sub>18</sub>NO<sub>2</sub><sup>+</sup>: 232.1332, found: 232.1342.



**Melting Point:** 78.0 – 79.6 °C

**FTIR (cm<sup>-1</sup>):** 3215, 1964, 2946, 2866, 1630, 1507, 1497, 1242, 1067, 852, 730.

### ***N*-(benzyloxy)-2-cyclobutylideneacetamide (12ag)**

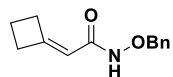

Following **Method B** from the general procedures for the synthesis of hydroxamate esters, in a flame-dried round-bottom flask under Argon atmosphere, BnONH<sub>2</sub>·HCl (442.8 mg, 2.78 mmol, 2.0 equiv.) was suspended in dry Toluene (7 mL, 0.2 M). The reaction mixture was then cooled down to –40 °C using an acetone cooling bath. Then a solution of AlMe<sub>3</sub> (1.4 mL, 2M in toluene, 2.0 equiv.) was added dropwise avoiding a spike in temperature greater than 20 °C. After the addition was done, compound **13ag** (175 mg, 1.39 mmol, 1.0 equiv.) was added, the reaction was allowed to warm to room temperature, and it was allowed to stir overnight. The reaction was then quenched with 3M HCl until gas evolution ceased. The reaction mixture was then partitioned with 10 mL H<sub>2</sub>O and extracted three times with 10 mL EtOAc. The combined organic layers were dried over Na<sub>2</sub>SO<sub>4</sub> and concentrated *in vacuo*. The crude reaction mixture was purified by column chromatography on silica gel (70/30 hexanes:EtOAc) to afford *N*-(benzyloxy)-2-cyclobutylideneacetamide **12ag** as colorless oil (202 mg, 67%).

**<sup>1</sup>H NMR (600 MHz, DMSO-*d*<sub>6</sub>)** δ 10.84 (bs, 1H), 7.39 – 7.34 (m, 5H), 5.60 (bs, 1H), 4.78 (s, 2H), 3.03 (t, *J* = 8.1 Hz, 2H), 2.75 (t, *J* = 7.9 Hz, 2H), 2.01 (p, *J* = 7.9 Hz, 2H).

**<sup>13</sup>C NMR (150 MHz, DMSO-*d*<sub>6</sub>)** δ 163.5, 161.2, 136.2, 128.7, 128.3, 128.2, 76.9, 33.1, 31.9, 17.7.

**HRMS:** Calculated [M+H]<sup>+</sup> for C<sub>13</sub>H<sub>16</sub>NO<sub>2</sub><sup>+</sup>: 218.1176, found: 218.1180.

**FTIR (cm<sup>-1</sup>):** 3182, 2956, 1682, 1633, 1496, 1360, 1250, 1209, 1046, 846, 741.

### **2-((1*r*,3*r*,3*R*,7*S*)-adamant-2-ylidene)-*N*-(benzyloxy)acetamide (12ah)**

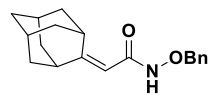

Following **Method A** from the general procedures for the synthesis of hydroxamate esters, in an oven-dried round-bottom flask under Argon atmosphere, OBnNH<sub>2</sub>·HCl (996 mg, 1.0 equiv.) was suspended in THF:DCM (32 mL, 1:1, 0.2 M) at room temperature. The reaction mixture was cooled down to 0 °C using a water-ice bath. NEt<sub>3</sub> (2.4 mL, 1.5 equiv.) was added, and the reaction mixture was allowed to stir for 30 min at 0 °C. HOBt hydrate (957 mg, 1.0 equiv.) and compound **13ah** (1.2 g, 6.24 mmol, 1.0 equiv.) were added subsequently, and the reaction was allowed to stir for an additional 30 min at 0 °C. Finally, NEt<sub>3</sub> (2.4 mL, 1.5 equiv.) were added, reaction was allowed to warm up to room temperature and it was allowed to stir overnight. The reaction was then filtered, and the obtained filtrate was diluted with 30 mL of EtOAc and then washed once with 30 mL HCl (3 M), followed by one wash with 30 mL conc. NaHCO<sub>3</sub> and finally with 30 mL H<sub>2</sub>O. The combined organic layers were dried over Na<sub>2</sub>SO<sub>4</sub> and concentrated *in vacuo*. The crude reaction mixture was purified by column chromatography on silica gel (70/30 hexanes:EtOAc) to afford 2-((1*r*,3*r*,3*R*,7*S*)-adamant-2-ylidene)-*N*-(benzyloxy)acetamide **12ah** as white solid (1.4 g, 75%).

**<sup>1</sup>H NMR (600 MHz, DMSO-*d*<sub>6</sub>)** δ 10.89 (bs, 1H), 7.40 – 7.34 (m, 5H), 5.37 (s, 1H), 4.80 (s, 2H), 4.08 (bs, 1H), 2.32 (bs, 1H), 1.92 – 1.89 (m, 6H), 1.82 (bs, 2H), 1.76 – 1.70 (m, 4H).

**<sup>13</sup>C NMR (150 MHz, DMSO-*d*<sub>6</sub>)** δ 165.9, 164.4, 136.2, 128.7, 128.3, 128.1, 108.0, 76.9, 40.4, 40.1, 39.5, 38.5, 36.3, 31.7, 27.3.

**HRMS:** Calculated [M+H]<sup>+</sup> for C<sub>19</sub>H<sub>24</sub>NO<sub>2</sub><sup>+</sup>: 298.1802, found: 298.1808.

**Melting Point:** 111.1 – 113.8 °C

**FTIR (cm<sup>-1</sup>):** 3272, 2908, 2850, 1652, 1633, 1499, 1447, 1252, 1187, 1055, 951, 747, 738, 697.

### ***N*-(benzyloxy)-2-(tetrahydro-4*H*-pyran-4-ylidene)acetamide (12ai)**

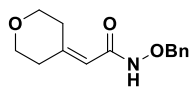

Following **Method B** from the general procedures for the synthesis of hydroxamate esters, in a flame-dried round-bottom flask under Argon atmosphere, BnONH<sub>2</sub>·HCl (1.756 g, 11.0 mmol, 2.0 equiv.) was suspended in dry Toluene (28 mL, 0.2 M). The reaction mixture was then cooled down to –40 °C using an acetone cooling bath. Then a solution of AlMe<sub>3</sub> (5.5 mL, 2M in toluene, 2.0 equiv.) was added dropwise avoiding a spike in temperature greater than 20 °C. After the addition was done, compound **13ai** (859 mg, 5.5 mmol, 1.0 equiv.) was added, the reaction was allowed to warm to room temperature, and it was allowed to stir overnight. The reaction was then quenched with 3M HCl until gas evolution ceased. The reaction mixture was then partitioned with 30 mL H<sub>2</sub>O and extracted three times with 30 mL EtOAc. The combined organic layers were dried over Na<sub>2</sub>SO<sub>4</sub> and concentrated *in vacuo*. The crude reaction mixture was purified by column chromatography on silica gel (70/30 hexanes:EtOAc) to afford *N*-(benzyloxy)-2-(tetrahydro-4*H*-pyran-4-ylidene)acetamide **12ai** as colorless oil (1.184 g, 87%).

**<sup>1</sup>H NMR (600 MHz, DMSO-*d*<sub>6</sub>)** δ 11.02 (bs, 1H), 7.41 – 7.35 (m, 5H), 5.49 (bs, 1H), 4.81 (s, 2H), 3.65 (t, *J* = 5.5 Hz, 2H), 3.60 (t, *J* = 5.5 Hz, 2H), 2.92 (t, *J* = 5.6 Hz, 2H), 2.21 (t, *J* = 5.6 Hz, 2H).

**<sup>13</sup>C NMR (150 MHz, DMSO-*d*<sub>6</sub>)** δ 163.8, 152.5, 138.3, 128.7, 128.3, 113.5, 76.9, 68.4, 67.7, 36.9, 30.4.

**HRMS:** Calculated [M+H]<sup>+</sup> for C<sub>14</sub>H<sub>18</sub>NO<sub>3</sub><sup>+</sup>: 248.1281, found: 248.1290.

**FTIR (cm<sup>-1</sup>):** 3197, 2961, 2850, 1662, 1638, 1231, 1096, 1053, 982, 909, 729, 696.

### ***E*)-*N*-(benzyloxy)-4-phenylbut-3-enamide (12aj)**

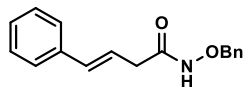

Following **Method A** from the general procedures for the synthesis of hydroxamate esters, in an oven-dried round-bottom flask under Argon atmosphere, OBnNH<sub>2</sub>·HCl (985 mg, 1.0 equiv.) was suspended in THF:DCM (30 mL, 1:1, 0.2 M) at room temperature. The reaction mixture was cooled down to 0 °C using a water-ice bath. NEt<sub>3</sub> (1.3 mL, 1.5 equiv.) was added, and the reaction mixture was allowed to stir for 30 min at 0 °C. HOBt hydrate (947 mg, 1.0 equiv.) and (*E*)-4-phenylbut-3-enoic acid (1.0 g, 6.17 mmol, 1.0 equiv.) were added subsequently, and the reaction was allowed to stir for an additional 30 min at 0 °C. Finally, NEt<sub>3</sub> (1.3 mL, 1.5 equiv.) were added, reaction was allowed to warm up to room temperature and it was allowed to stir overnight. The reaction was then filtered, and the obtained filtrate was diluted with 30 mL of EtOAc and then washed once with 30 mL HCl (3 M), followed by one wash with 30 mL conc. NaHCO<sub>3</sub> and finally with 30 mL H<sub>2</sub>O. The combined organic layers were dried over Na<sub>2</sub>SO<sub>4</sub> and concentrated *in vacuo*. The crude reaction mixture was purified by column chromatography on silica gel (70/30 hexanes:EtOAc) to (*E*)-*N*-(benzyloxy)-4-phenylbut-3-enamide **12aj** as white solid (1.5 g, 95%).

**<sup>1</sup>H NMR (600 MHz, DMSO-*d*<sub>6</sub>)** δ 11.12 (s, 1H), 7.41 – 7.22 (m, 10H), 6.47 (d, *J* = 15.9 Hz, 1H), 6.27 (dt, *J* = 15.9, 7.1 Hz, 1H), 4.80 (s, 2H), 2.95 – 2.94 (m, 2H).

<sup>13</sup>C NMR (150 MHz, DMSO-d<sub>6</sub>) δ 167.2, 136.7, 136.0, 132.4, 128.8, 128.6, 128.3, 128.2, 127.4, 126.0, 123.5, 76.8, 36.7.

HRMS: Calculated [M+H]<sup>+</sup> for C<sub>17</sub>H<sub>18</sub>NO<sub>2</sub><sup>+</sup>: 268.1332, found: 268.1336.

Melting Point: 81.7 – 85.7 °C

FTIR (cm<sup>-1</sup>): 3126, 3062, 3028, 2928, 2851, 1667, 1626, 1487, 1449, 1039, 1016, 963, 747, 693.

### ***N*-(benzyloxy)-4-methylpent-4-enamide (12ak)**

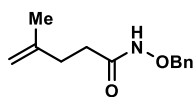

Following **Method B** from the general procedures for the synthesis of hydroxamate esters, in a flame-dried round-bottom flask under Argon atmosphere, BnONH<sub>2</sub>·HCl (1.6 g, 10.0 mmol, 2.0 equiv.) was suspended in dry Toluene (25 mL, 0.2 M). The reaction mixture was then cooled down to -40 °C using an acetone cooling bath. Then a solution of AlMe<sub>3</sub> (5 mL, 2M in toluene, 2.0 equiv.) was added dropwise avoiding a spike in temperature greater than 20 °C. After the addition was done, compound **13ak** (711 mg, 5 mmol, 1.0 equiv.) was added, the reaction was allowed to warm to room temperature, and it was allowed to stir overnight. The reaction was then quenched with 3M HCl until gas evolution ceased. The reaction mixture was then partitioned with 30 mL H<sub>2</sub>O and extracted three times with 30 mL EtOAc. The combined organic layers were dried over Na<sub>2</sub>SO<sub>4</sub> and concentrated *in vacuo*. The crude reaction mixture was purified by column chromatography on silica gel (70/30 hexanes:EtOAc) to afford *N*-(benzyloxy)-4-methylpent-4-enamide **12ak** as colorless oil (949 g, 87%).

<sup>1</sup>H NMR (600 MHz, DMSO-d<sub>6</sub>) δ 10.98 (s, 1H), 7.38 – 7.31 (m, 5H), 4.76 (s, 2H), 4.69 (s, 1H), 4.65 (s, 1H), 2.19 (t, *J* = 7.6 Hz, 2H), 2.08 (dd, *J* = 8.6, 6.6 Hz, 2H), 1.67 (s, 3H).

<sup>13</sup>C NMR (150 MHz, DMSO-d<sub>6</sub>) δ 174.0, 149.5, 141.3, 134.0, 133.5, 133.4, 115.5, 82.0, 37.9, 35.8, 27.5.

HRMS: Calculated [M+H]<sup>+</sup> for C<sub>13</sub>H<sub>18</sub>NO<sub>2</sub><sup>+</sup>: 220.1332, found: 220.1338.

FTIR (cm<sup>-1</sup>): 3185, 3068, 3031, 2969, 2938, 1648, 1497, 1454, 1069, 1028, 975, 888, 745.

### ***N*-(benzyloxy)-5-oxo-5-phenylpentanamide (12al)**

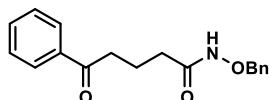

Following **Method A** from the general procedures for the synthesis of hydroxamate esters, in an oven-dried round-bottom flask under Argon atmosphere, OBnNH<sub>2</sub>·HCl (869 mg, 1.0 equiv.) was suspended in THF:DCM (52 mL, 1:1, 0.2 M) at room temperature. The reaction mixture was cooled down to 0 °C using a water-ice bath. NEt<sub>3</sub> (2.2 mL, 1.5 equiv.) was added, and the reaction mixture was allowed to stir for 30 min at 0 °C. HOBT hydrate (1.6 g, 1.0 equiv.) and 5-oxo-5-phenylpentanoic acid (2.0 g, 10.4 mmol, 1.0 equiv.) were added subsequently, and the reaction was allowed to stir for an additional 30 min at 0 °C. Finally, NEt<sub>3</sub> (2.2 mL, 1.5 equiv.) were added, reaction was allowed to warm up to room temperature and it was allowed to stir overnight. The reaction was then filtered, and the obtained filtrate was diluted with 50 mL of EtOAc and then washed once with 50 mL HCl (3 M), followed by one wash with 50 mL conc. NaHCO<sub>3</sub> and finally with 50 mL H<sub>2</sub>O. The combined organic layers were dried over Na<sub>2</sub>SO<sub>4</sub> and concentrated *in vacuo*. The crude reaction mixture was purified by column chromatography on silica gel (70/30 hexanes:EtOAc) to afford *N*-(benzyloxy)-5-oxo-pehnylpentanamide **12al** as white solid (1.1 g, 36%).

**<sup>1</sup>H NMR (600 MHz, DMSO-d<sub>6</sub>)** δ 10.97 (s, 1H), 7.94 – 7.93 (m, 2H), 7.65 – 7.62 (m, 1H), 7.54 - 7.52 (m, 2H), 7.39 – 7.32 (m, 5H), 4.78 (s, 2H), 3.01 (t, *J* = 7.1 Hz, 2H), 2.04 (t, *J* = 7.3 Hz, 2H), 1.84 (t, *J* = 7.2 Hz, 2H).  
**<sup>13</sup>C NMR (150 MHz, DMSO-d<sub>6</sub>)** δ 199.5, 169.1, 136.6, 136.1, 133.1, 128.7, 128.7, 128.3, 128.2, 127.8, 76.7, 37.0, 31.4, 19.6.

**HRMS:** Calculated [M+H]<sup>+</sup> for C<sub>18</sub>H<sub>20</sub>NO<sub>3</sub><sup>+</sup>: 298.1438, found: 298.1442.

**Melting Point:** 78.5 – 79.6 °C

**FTIR (cm<sup>-1</sup>):** 3220, 3060, 3041, 2970, 2929, 2851, 1738, 1655, 1513, 1448, 1373, 1198, 968, 727, 687.

### ***N*-(benzyloxy)-6-oxo-6-phenylhexanamide (12am)**

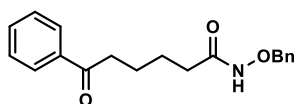

Following **Method A** from the general procedures for the synthesis of hydroxamate esters, in an oven-dried round-bottom flask under Argon atmosphere, OBnNH<sub>2</sub>·HCl (810 mg, 1.0 equiv.) was suspended in THF:DCM (48 mL, 1:1, 0.2 M) at room temperature. The reaction mixture was cooled down to 0 °C using a water-ice bath. NEt<sub>3</sub> (2.1 mL, 1.5 equiv.) was added, and the reaction mixture was allowed to stir for 30 min at 0 °C. HOBT hydrate (1.5 g, 1.0 equiv.) and 6-oxo-6-phenylhexanoic acid (2.0 g, 10.4 mmol, 1.0 equiv.) were added subsequently, and the reaction was allowed to stir for an additional 30 min at 0 °C. Finally, NEt<sub>3</sub> (2.1 mL, 1.5 equiv.) were added, reaction was allowed to warm up to room temperature and it was allowed to stir overnight. The reaction was then filtered, and the obtained filtrate was diluted with 50 mL of EtOAc and then washed once with 50 mL HCl (3 M), followed by one wash with 50 mL conc. NaHCO<sub>3</sub> and finally with 50 mL H<sub>2</sub>O. The combined organic layers were dried over Na<sub>2</sub>SO<sub>4</sub> and concentrated *in vacuo*. The crude reaction mixture was purified by column chromatography on silica gel (70/30 hexanes:EtOAc) to afford *N*-(benzyloxy)-6-oxo-6-phenylhexanamide **12aI** as white solid (1.5 g, 50%).

**<sup>1</sup>H NMR (600 MHz, DMSO-d<sub>6</sub>)** δ 10.96 (s, 1H), 7.97 – 7.95 (m, 2H), 7.64 – 7.62 (m, 1H), 7.54 – 7.51 (m, 2H), 7.40 – 7.32 (m, 5H), 4.77 (s, 2H), 3.02 (t, *J* = 6.7 Hz, 2H), 1.99 (t, *J* = 6.7 Hz, 2H), 1.59 – 1.55 (m, 4H).

**<sup>13</sup>C NMR (150 MHz, DMSO-d<sub>6</sub>)** δ 199.9, 169.2, 136.7, 136.1, 133.1, 128.8, 128.7, 128.3, 128.2, 127.9, 76.8, 37.5, 32.1, 24.5, 23.2.

**HRMS:** Calculated [M+H]<sup>+</sup> for C<sub>19</sub>H<sub>22</sub>NO<sub>3</sub><sup>+</sup>: 312.1594, found: 312.1601.

**Melting Point:** 58.6 – 60.1 °C

**FTIR (cm<sup>-1</sup>):** 3239, 3059, 2997, 2970, 2956, 2870, 1738, 1649, 1446, 1372, 1218, 1017, 955, 754, 696.

## **13. Synthesis and characterization carboxylic acids (13):**

### **(*Z*)-2-bromo-3-phenylacrylic acid (13j)**

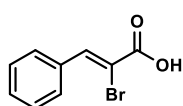

Following **Method A** from the general procedures for the synthesis of carboxylic acids, (*Z*)-2-bromo-3-phenylacrylaldehyde (3.5 g, 16.6 mmol) was dissolved in *t*-BuOH (33 mL, 0.5 M). Then NaClO<sub>2</sub> (5.6 g, 61.4 mmol) was added, followed by H<sub>2</sub>O (33 mL, 0.5 M) and 2-methyl-2-butene (15.8 mL, 150 mmol). Finally, NaH<sub>2</sub>PO<sub>4</sub> (9.96 g, 83 mmol) was added, and the reaction mixture was loosely capped. It was stirred vigorously at room temperature overnight. After full conversion, 50 mL saturated NH<sub>4</sub>Cl were added, and the reaction mixture was extracted with EtOAc (50 mL x 3). The combined organic layers partitioned with conc. NaHCO<sub>3</sub> until the aqueous layer was basic. It was extracted NaHCO<sub>3</sub> (50 mL x 4). The combined aqueous layers were then carefully acidified with 3 M

HCl, and it was extracted with DCM (60 mL x 4). The combined organic layers were then dried over Na<sub>2</sub>SO<sub>4</sub>. Evaporation of the solvent afforded (Z)-2-bromo-3-phenylacrylic acid **13j** as a white solid (2.632 g, 70%). NMR data matches the ones reported in the literature.<sup>11</sup>

<sup>1</sup>H NMR (600 MHz, CDCl<sub>3</sub>) δ 8.36 (s, 1H), 7.92 – 7.91 (m, 2H), 7.47 – 7.46 (m, 3H).

<sup>13</sup>C NMR (150 MHz, CDCl<sub>3</sub>) δ 168.5, 143.5, 133.5, 131.0, 130.8, 128.7, 111.6.

### (Z)-2-chloro-3-phenylacrylic acid (**13k**)

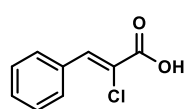

In a flame-dried round-bottom flask, benzaldehyde (1.684 g, 15.87 mmol) and 2-chloroacetaldehyde (1.000 g, 10.6 mmol) were dissolved in dry THF (53 mL, 0.2 M) under Argon atmosphere. The reaction mixture was cooled down to 0 °C, using an ice-water bath. Neat TiCl<sub>4</sub> (2.3 mL, 2.0 equiv.) was added slowly and the reaction mixture was left stirring for 30 min at the same temperature. NEt<sub>3</sub> (5.9 mL, 4.0 equiv.) was then added and the reaction mixture was allowed to warm to room temperature. The reaction was left stirring overnight. After completion, the reaction was quenched with 50 mL of conc. NH<sub>4</sub>Cl and it was extracted with EtOAc (60 mL x 3). The combined organic layers were dried over Na<sub>2</sub>SO<sub>4</sub> and concentrated *in vacuo*. The crude reaction mixture was purified by flash column chromatography (Hexane/EtOAc = 50/50) to afford (Z)-2-chloro-3-phenylacrylic acid **13k** as a white crystalline solid (1.553 g, 54%). NMR data matches the ones reported in the literature.<sup>12</sup>

<sup>1</sup>H NMR (600 MHz, CDCl<sub>3</sub>) δ 8.06 (s, 1H), 7.90 – 7.89 (m, 2H), 7.47 – 7.45 (m, 3H).

### (E)-2-methyl-3-phenylacrylic acid (**13l**)

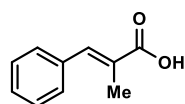

Following **Method A** from the general procedures for the synthesis of carboxylic acids, (Z)-2-methyl-3-phenylacrylaldehyde (10.47 g, 71.6 mmol) was dissolved in *t*-BuOH (145 mL, 0.5 M). Then NaClO<sub>2</sub> (23.97 g, 265 mmol) was added, followed by H<sub>2</sub>O (145 mL, 0.5 M) and 2-methyl-2-butene (69 mL, 645 mmol). Finally, NaH<sub>2</sub>PO<sub>4</sub> (42.97 g, 358 mmol) was added, and the reaction mixture was loosely capped. It was stirred vigorously at room temperature overnight. After full conversion, 100 mL saturated NH<sub>4</sub>Cl were added, and the reaction mixture was extracted with EtOAc (8100 mL x 3). The combined organic layers partitioned with conc. NaHCO<sub>3</sub> until the aqueous layer was basic. It was extracted NaHCO<sub>3</sub> (100 mL x 4). The combined aqueous layers were then carefully acidified with 3 M HCl, and it was extracted with DCM (150 mL x 4). The combined organic layers were then dried over Na<sub>2</sub>SO<sub>4</sub>. Evaporation of the solvent afforded (E)-2-methyl-3-phenylacrylic acid **13l** as a white solid (1.818 g, 47%). NMR data matches the ones reported in the literature.<sup>13</sup>

<sup>1</sup>H NMR (600 MHz, CDCl<sub>3</sub>) δ 7.84 (s, 1H), 7.46 – 7.41 (m, 4H), 7.38 – 7.34 (m, 1H), 2.16 (s, 3H).

<sup>11</sup> Ma, X., Li, W., Li, X., Tao, X., Fan, W., Xie, X., Ayad, T., Ratovelomanana-Vidal, V., Zhang, Z. *Chem. Commun.* **2012**, 48, 5352–5354.

<sup>12</sup> Ma, X., Li, W., Li, X., Tao, X., Fan, W., Xie, X., Ayad, T., Ratovelomanana-Vidal, V., Zhang, Z. *Chem. Commun.* **2012**, 48, 5352–5354.

<sup>13</sup> Su, M.D., Liu, Y.F., Nie, Z.W., Yang, T.L., Cao, Z.Z., Li, H., Luo, W.P., Liu, Q., Guo, C.C. *J. Org. Chem.* **2022**, 87, 7022–7032.

### (*E*)-2-benzylidenehexanoic acid (**13m**)

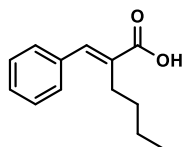

Following **Method A** from the general procedures for the synthesis of carboxylic acids, compound **14m** (1.36 g, 7.22 mmol) was dissolved in *t*-BuOH (14 mL, 0.5 M). Then NaClO<sub>2</sub> (1.96 g, 21.66 mmol) was added, followed by H<sub>2</sub>O (14 mL, 0.5 M) and 2-methyl-2-butene (6.9 mL, 65 mmol). Finally, NaH<sub>2</sub>PO<sub>4</sub> (4.33 g, 36 mmol) was added, and the reaction mixture was loosely capped. It was stirred vigorously at room temperature overnight. After full conversion, 25 mL saturated NH<sub>4</sub>Cl were added, and the reaction mixture was extracted with EtOAc (25 mL x 3). The combined organic layers partitioned with conc. NaHCO<sub>3</sub> until the aqueous layer was basic. It was extracted NaHCO<sub>3</sub> (25 mL x 3). The combined aqueous layers were then carefully acidified with 3 M HCl, and it was extracted with DCM (50 mL x 3). The combined organic layers were then dried over Na<sub>2</sub>SO<sub>4</sub>. Evaporation of the solvent afforded (*E*)-2-benzylidenehexanoic acid **13m** as a pale yellow crystalline solid (905 mg, 61%). NMR data matches the ones reported in the literature.<sup>14</sup>

<sup>1</sup>H NMR (600 MHz, CDCl<sub>3</sub>) δ 7.80 (s, 1H), 7.42 – 7.40 (m, 4H), 7.37 – 7.34 (m, 1H), 2.56 – 2.53 (m, 2H), 1.61 – 1.56 (tt, *J* = 8.0, 6.3 Hz, 2H), 1.44 – 1.38 (h, *J* = 7.3 Hz, 2H), 0.94 (t, *J* = 7.4 Hz, 3H).

<sup>13</sup>C NMR (150 MHz, CDCl<sub>3</sub>) δ 174.0, 141.1, 135.7, 129.6, 128.8, 128.7, 31.5, 27.2, 23.0, 14.0.

### (*E*)-3-phenyl-2-(pyridin-3-yl)acrylic acid (**13n**)

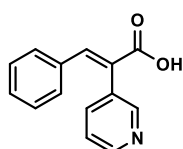

Following **Method A** from the general procedures for the synthesis of carboxylic acids, compound **14n** (750 mg, 3.58 mmol) was dissolved in *t*-BuOH (7 mL, 0.5 M). Then NaClO<sub>2</sub> (1.62 g, 17.9 mmol) was added, followed by H<sub>2</sub>O (7 mL, 0.5 M) and 2-methyl-2-butene (3.4 mL, 32 mmol). Finally, NaH<sub>2</sub>PO<sub>4</sub> (946 mg, 7.9 mmol) was added, and the reaction mixture was loosely capped. It was stirred vigorously at room temperature overnight. After full conversion, 7 mL saturated NH<sub>4</sub>Cl were added, and the reaction mixture was extracted with EtOAc (25 mL x 3). The combined organic layers partitioned with conc. NaHCO<sub>3</sub> until the aqueous layer was basic. It was extracted NaHCO<sub>3</sub> (25 mL x 3). The combined aqueous layers were then carefully acidified with 3 M HCl, and it was extracted with DCM (50 mL x 3). The combined organic layers were then dried over Na<sub>2</sub>SO<sub>4</sub>. Evaporation of the solvent afforded (*E*)-3-phenyl-2-(pyridine-3-yl)acrylic acid **13n** as a white crystalline solid (260 mg, 32%).

<sup>1</sup>H NMR (600 MHz, DMSO-*d*<sub>6</sub>) δ 12.93 (s, 1H), 8.54 (dd, *J* = 4.8, 1.7 Hz, 1H), 8.32 (dd, *J* = 2.3, 0.9 Hz, 1H), 7.89 (s, 1H), 7.64 (ddd, *J* = 7.8, 2.3, 1.7 Hz, 1H), 7.42 (ddd, *J* = 7.8, 4.9, 0.9 Hz, 1H), 7.27 – 7.22 (m, 3H), 7.07 – 7.05 (m, 2H).

<sup>13</sup>C NMR (150 MHz, DMSO-*d*<sub>6</sub>) δ 167.9, 149.9, 148.5, 140.6, 137.6, 134.1, 132.2, 130.2, 10.2, 129.3, 128.5, 123.5.

HRMS: Calculated [M+H]<sup>+</sup> for C<sub>14</sub>H<sub>12</sub>NO<sub>2</sub><sup>+</sup>: 226.0868, found: 226.0884

Melting Point: 236.7 – 239.5 °C

FTIR (cm<sup>-1</sup>): 3055, 3028, 2422, 1671, 1627, 1591, 1572, 1410, 1239, 1192, 1174, 1009, 776, 718, 690.

<sup>14</sup> Fujihara, T., Xu, T., Semba, K., Terao, Tsuji, Y. *Angew. Chem. Int. Ed.* **2011**, 50, 523–527.

### (*E*)-2-(2-methoxyphenyl)-2-phenylacrylic acid (**13o**)

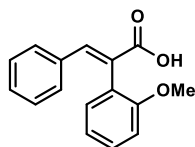

Following **Method A** from the general procedures for the synthesis of carboxylic acids, compound **14o** (3.6 g, 15.1 mmol) was dissolved in *t*-BuOH (30 mL, 0.5 M). Then NaClO<sub>2</sub> (4.1 g, 45.3 mmol) was added, followed by H<sub>2</sub>O (30 mL, 0.5 M) and 2-methyl-2-butene (14.4 mL, 136 mmol). Finally, NaH<sub>2</sub>PO<sub>4</sub> (9.07 g, 75.6 mmol) was added, and the reaction mixture was loosely capped. It was stirred vigorously at room temperature overnight. After full conversion, 30 mL saturated NH<sub>4</sub>Cl were added, and the reaction mixture was extracted with EtOAc (50 mL x 3). The combined organic layers partitioned with conc. NaHCO<sub>3</sub> until the aqueous layer was basic. It was extracted NaHCO<sub>3</sub> (50 mL x 4). The combined aqueous layers were then carefully acidified with 3 M HCl, and it was extracted with DCM (60 mL x 4). The combined organic layers were then dried over Na<sub>2</sub>SO<sub>4</sub>. Evaporation of the solvent afforded (*E*)-2-(2-methoxyphenyl)-3-phenylacrylic acid **13o** as a white solid (3.646 g, 95%).

<sup>1</sup>H NMR (600 MHz, CDCl<sub>3</sub>) δ 7.93 (s, 1H), 7.38 – 7.36 (m, 1H), 7.24 – 7.21 (m, 1H), 7.19 – 7.16 (m, 2H), 7.12 – 7.10 (m, 2H), 7.08 – 7.06 (m, 1H), 6.99 – 6.97 (m, 2H), 6.96 – 6.93 (m, 2H), 3.76 (s, 3H).

<sup>13</sup>C NMR (150 MHz, CDCl<sub>3</sub>) δ 129.9, 157.6, 142.5, 134.8, 131.0, 130.7, 130.7, 130.6, 130.0, 129.5, 128.9, 128.4, 128.4, 124.8, 121.2, 111.4, 55.8.

HRMS: Calculated [M-H]<sup>+</sup> for C<sub>16</sub>H<sub>13</sub>O<sub>2</sub>: 253.0870, found: 253.0876.

Melting Point: 146.9 – 147.7 °C

FTIR (cm<sup>-1</sup>): 3059, 3016, 2962, 2938, 2622, 1670, 1490, 1461, 1447, 1433, 1417, 1274, 1245, 749

### (*E*)-2-(4-methoxyphenyl) 2-phenylacrylic acid (**13p**)

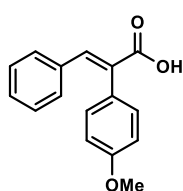

Following **Method A** from the general procedures for the synthesis of carboxylic acids, compound **14p** (2.0 g, 8.4 mmol) was dissolved in *t*-BuOH (8 mL, 0.5 M). Then NaClO<sub>2</sub> (2.3 g, 25.2 mmol) was added, followed by H<sub>2</sub>O (8 mL, 0.5 M) and 2-methyl-2-butene (8 mL, 76 mmol). Finally, NaH<sub>2</sub>PO<sub>4</sub> (5.0 g, 42 mmol) was added, and the reaction mixture was loosely capped. It was stirred vigorously at room temperature overnight. After full conversion, 15 mL saturated NH<sub>4</sub>Cl were added, and the reaction mixture was extracted with EtOAc (30 mL x 3). The combined organic layers partitioned with conc. NaHCO<sub>3</sub> until the aqueous layer was basic. It was extracted NaHCO<sub>3</sub> (30 mL x 4). The combined aqueous layers were then carefully acidified with 3 M HCl, and it was extracted with DCM (40 mL x 4). The combined organic layers were then dried over Na<sub>2</sub>SO<sub>4</sub>. Evaporation of the solvent afforded (*E*)-2-(4-methoxyphenyl)-3-phenylacrylic acid **13p** as a white solid (1.912 g, 90%). NMR data matches the ones reported in the literature.<sup>15</sup>

<sup>1</sup>H NMR (600 MHz, CDCl<sub>3</sub>) δ 7.92 (s, 1H), 7.25 – 7.22 (m, 1H), 7.20 – 7.16 (m, 4H), 7.12 – 7.10 (m, 2H), 6.92 – 6.91 (m, 2H), 3.84 (s, 3H).

<sup>15</sup> Zhou, Z., Dixon, D.D., Jolit, A., Tius, M.A. *Chem. Eur. J.* **2016**, *22*, 15929–15936.

### (*E*)-2,3-diphenylacrylic acid (**13q**)

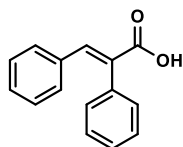

Following **Method A** from the general procedures for the synthesis of carboxylic acids, compound **14q** (3.75 g, 18.02 mmol) was dissolved in *t*-BuOH (18 mL, 0.5 M). Then NaClO<sub>2</sub> (4.89 g, 54.05 mmol) was added, followed by H<sub>2</sub>O (18 mL, 0.5 M) and 2-methyl-2-butene (17.2 mL, 162 mmol). Finally, NaH<sub>2</sub>PO<sub>4</sub> (10.8 g, 90.1 mmol) was added, and the reaction mixture was loosely capped. It was stirred vigorously at room temperature overnight. After full conversion, 30 mL saturated NH<sub>4</sub>Cl were added, and the reaction mixture was extracted with EtOAc (50 mL x 3). The combined organic layers partitioned with conc. NaHCO<sub>3</sub> until the aqueous layer was basic. It was extracted NaHCO<sub>3</sub> (50 mL x 4). The combined aqueous layers were then carefully acidified with 3 M HCl, and it was extracted with DCM (60 mL x 4). The combined organic layers were then dried over Na<sub>2</sub>SO<sub>4</sub>. Evaporation of the solvent afforded (*E*)-2,3-diphenylacrylic acid **13q** as a white solid (3.82 g, 94%). NMR data matches the ones reported in the literature.<sup>16</sup>

<sup>1</sup>H NMR (600 MHz, CDCl<sub>3</sub>) δ 7.96 (s, 1H), 7.41 – 7.37 (m, 3H), 7.26 – 7.22 (m, 3H), 7.18 – 7.16 (m, 2H), 7.08 – 7.06 (m, 2H).

### (*E*)-2-(4-nitrophenyl)-3-phenylacrylic acid (**13r**)

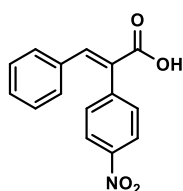

Following **Method A** from the general procedures for the synthesis of carboxylic acids, compound **14r** (2.0 g, 7.9 mmol) was dissolved in *t*-BuOH (9 mL, 0.5 M). Then NaClO<sub>2</sub> (2.14 g, 29.23 mmol) was added, followed by H<sub>2</sub>O (9 mL, 0.5 M) and 2-methyl-2-butene (7.53 mL, 71.71 mmol). Finally, NaH<sub>2</sub>PO<sub>4</sub> (4.74 g, 39.5 mmol) was added, and the reaction mixture was loosely capped. It was stirred vigorously at room temperature overnight. After full conversion, 10 mL saturated NH<sub>4</sub>Cl were added, and the reaction mixture was extracted with EtOAc (20 mL x 3). The combined organic layers partitioned with conc. NaHCO<sub>3</sub> until the aqueous layer was basic. It was extracted NaHCO<sub>3</sub> (20 mL x 4). The combined aqueous layers were then carefully acidified with 3 M HCl, and it was extracted with DCM (30 mL x 4). The combined organic layers were then dried over Na<sub>2</sub>SO<sub>4</sub>. Evaporation of the solvent afforded (*E*)-2-(4-nitrophenyl)-3-phenylacrylic acid **13r** as a white solid (1.7 g, 80%). NMR data matches the ones reported in the literature.<sup>17</sup>

<sup>1</sup>H NMR (600 MHz, CDCl<sub>3</sub>) δ 8.24 (d, *J* = 8.8 Hz, 2H), 8.07 (s, 1H), 7.44 (d, *J* = 8.8 Hz, 2H), 7.31 – 7.28 (m, 1H), 7.23 – 7.20 (m, 2H), 7.05 – 7.04 (m, 2H).

<sup>13</sup>C NMR (150 MHz, CDCl<sub>3</sub>) δ 171.7, 147.7, 144.5, 142.5, 133.5, 131.4, 130.9, 130.4, 129.6, 128.8, 124.0.

### (*E*)-3-phenylbut-2-enoic acid (**13u**)

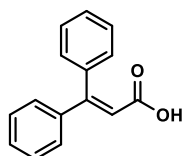

Following **Method A** from the general procedures for the synthesis of carboxylic acids, compound **14u** (1.0 g, 4.8 mmol) was dissolved in *t*-BuOH (5 mL, 0.5 M). Then NaClO<sub>2</sub> (1.3 g, 14.4 mmol) was added, followed by H<sub>2</sub>O (5 mL, 0.5 M) and 2-methyl-2-butene (4.6 mL, 43.2 mmol). Finally, NaH<sub>2</sub>PO<sub>4</sub> (2.88 g, 24.0 mmol) was added, and the reaction mixture was loosely capped. It was stirred vigorously at room temperature overnight.

<sup>16</sup> Wang, X., Nakajima, M., Martin, R. *J. Am. Chem. Soc.* **2015**, 137, 8924–8927.

<sup>17</sup> Song, C., Chen, P., Tang, Y. *RSC. Adv.* **2017**, 7, 11233–11243.



After full conversion, 10 mL saturated NH<sub>4</sub>Cl were added, and the reaction mixture was extracted with EtOAc (20 mL x 3). The combined organic layers partitioned with conc. NaHCO<sub>3</sub> until the aqueous layer was basic. It was extracted NaHCO<sub>3</sub> (20 mL x 4). The combined aqueous layers were then carefully acidified with 3 M HCl, and it was extracted with DCM (30 mL x 4). The combined organic layers were then dried over Na<sub>2</sub>SO<sub>4</sub>. Evaporation of the solvent afforded (*E*)-3-phenylbut-2-enoic acid **13u** as a white solid (1.7 g, 80%). NMR data matches the ones reported in the literature.<sup>18</sup>

<sup>1</sup>H NMR (600 MHz, CDCl<sub>3</sub>) δ 7.39 – 7.36 (m, 4H), 7.34 – 7.32 (m, 2H), 7.29 – 7.27 (m, 2H), 7.23 – 7.21 (m, 2H), 6.35 (s, 1H).

<sup>13</sup>C NMR (150 MHz, CDCl<sub>3</sub>) δ 169.3, 158.9, 140.7, 138.4, 129.8, 129.2, 128.5, 128.4, 128.3, 128.0, 116.1.

### Methyl 3-oxopropanoate (**13'**)

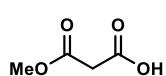

Following a modified literature procedure<sup>19</sup>, dimethyl malonate (20 g, 151.4 mmol) was suspended in a mixture MeCN:H<sub>2</sub>O (15 mL, 10 M) and then cooled down to 0 °C using an ice/water bath. Then 30 mL of a 5M solution of KOH were added over 20 min (1.0 equiv.) via an addition funnel. The reaction was left stirring at 0 °C for one hour. Then it was warmed to room temperature, diluted with 50 mL of distilled H<sub>2</sub>O and extracted with EtOAc (50 mL x 3). The aqueous layer was then carefully acidified with 3 M HCl, and it was extracted with EtOAc (50 mL x 4). The combined organic layers were then dried over Na<sub>2</sub>SO<sub>4</sub>. Evaporation of the solvent afforded methyl 3-oxopropanoate **13'** as a colorless oil (12.571 g, 70%). NMR data matches the ones reported in the literature.<sup>20</sup>

<sup>1</sup>H NMR (600 MHz, CDCl<sub>3</sub>) δ 3.79 (s, 3H), 3.45 (s, 2H).

<sup>13</sup>C NMR (150 MHz, CDCl<sub>3</sub>) δ 170.7, 167.7, 53.0, 40.5.

### 1-(*tert*-butoxycarbonyl)-1*H*-indole-3-carboxylic acid (**13ac**)

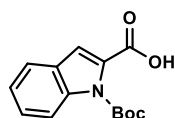

Following a known literature procedure<sup>21</sup> *N*-hydroxycinnamamide **13ac** was prepared as a pale pink powder. The NMR data matches the one reported in the literature.<sup>22</sup>

### 2-((1*r*,3*r*,5*R*,7*S*)-adamantan-2-ylidene)acetic acid (**13ah**)

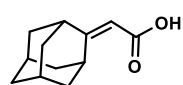

Following **Method B** from the general procedures for the synthesis of carboxylic acids, in a round-bottom flask open to air, LiOH (336 mg, 14 mmol, 1.2 equiv.) was dissolved in THF:H<sub>2</sub>O (12:12 mL, 0.5 M) at room temperature. The reaction mixture was then cooled down to 0 °C using an ice-water bath. Then methyl 2-((1*r*,3*r*,5*R*,7*S*)-adamantan-2-ylidene)acetate (2.4 g, 11.6 mmol, 1.0 equiv.) was added slowly. After complete addition, the reaction mixture was allowed to warm to room temperature, and it was monitored by TLC. After full consumption of the starting material, the solvent was removed *in vacuo* and conc. NaHCO<sub>3</sub> (20 mL) was added to the reaction mixture.

<sup>18</sup> Tanaka, S., Watanabe, K., Tanaka, Y., Hattori, T. *Org. Lett.* **2016**, *18*, 2576–2579.

<sup>19</sup> Niwayama, S., Cho, H., Lin, C. *Tett. Lett.* **2008**, *49*, 4434–4436.

<sup>20</sup> Niwayama, S., Cho, H., Lin, C. *Tett. Lett.* **2008**, *49*, 4434–4436.

<sup>21</sup> Usachova, N., Leitis, G., Jirgensons, A., Kalvinsh, I. *Synthn. Commun.* **2010**, *40*, 927–935.

<sup>22</sup> Shen, Q-K, Deng, H., Wang, S-B., Tian Y-S., Quan, Z-S. *Eur. J. Med. Chem.* **2019**, *173*, 15–31.

It was then partitioned in DCM (50 mL), and it was extracted with DCM (3 x 50 mL). The aqueous layer was then carefully acidified with 3 M HCl, and it was extracted with DCM (3 x 50 mL). The combined organic layers were then dried over Na<sub>2</sub>SO<sub>4</sub>. Evaporation of the solvent afforded 2-((1*r*,3*r*,5*R*,7*S*)-adamantan-2-ylidene)acetic acid **13ah** as a white crystalline solid (1.79 g, 80%).

<sup>1</sup>H NMR (600 MHz, CDCl<sub>3</sub>) δ 11.53 (brs, 1H), 5.61 (s, 1H), 4.06 (s, 1H), 2.48 (d, *J* = 2.75 Hz, 1H), 1.98 – 1.94 (m, 5H), 1.88 – 1.81 (m, 5H).

<sup>13</sup>C NMR (150 MHz, CDCl<sub>3</sub>) δ 175.5, 172.4, 108.3, 41.8, 40.3, 39.4, 36.9, 33.3, 28.0.

HRMS: Calculated [M-H]<sup>+</sup> for C<sub>12</sub>H<sub>15</sub>O<sub>2</sub><sup>+</sup>: 191.1078, found: 191.1078.

Melting Point: 138.0 – 141.0 °C

FTIR (cm<sup>-1</sup>): 2999, 2920, 2898, 2849, 2569, 1682, 1671, 1629, 1450, 1416, 1250, 1209, 1189, 931, 867, 701.

## 14. Synthesis and characterization of α,β-unsaturated esters (13):

### Methyl (*E*)-3-(naphthalene-2-yl)acrylate (13f)

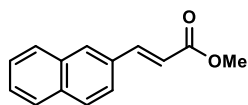

Following **Method A** from the general procedures for the synthesis of α,β-unsaturated esters, in a flame-dried round bottom flask under Argon atmosphere, sodium hydride (462 mg, 11.53 mmol, 1.2 equiv.) was suspended in dry THF (32 mL, 0.3 M). Trimethyl phosphonoacetate (1.67 mL, 11.53 mmol, 1.2 equiv.) was then added slowly at room temperature. After 5 min, 2-naphthaldehyde (1.5 g, 9.6 mmol, 1.0 equiv.) was added to reaction mixture. The reaction mixture was then heated to reflux (66 °C) overnight. After completion, the reaction was allowed to cool down to room temperature, it was partitioned with H<sub>2</sub>O (50 mL) and extracted with EtOAc (3 x 50 mL). The combined organic layers were dried over Na<sub>2</sub>SO<sub>4</sub> and concentrated *in vacuo*. The crude mixture was purified by column chromatography on silica gel (95:5 hexanes:EtOAc) to afford methyl (*E*)-3-(naphthalene-2-yl)acrylate **13f** as a colorless oil (1.2 g, 59%). NMR data matches the ones reported in the literature.<sup>23</sup>

<sup>1</sup>H NMR (600 MHz, CDCl<sub>3</sub>) δ 7.94 (s, 1H), 7.88 – 7.83 (m, 4H), 7.67 (dd, *J* = 8.5, 1.8 Hz, 1H), 7.54 – 7.50 (m, 2H), 6.56 (d, *J* = 16.0 Hz, 1H), 3.84 (s, 3H).

### Methyl (*E*)-3-(naphthalene-1-yl)acrylate (13g)

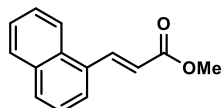

Following **Method A** from the general procedures for the synthesis of α,β-unsaturated esters, in a flame-dried round bottom flask under Argon atmosphere, sodium hydride (462 mg, 11.53 mmol, 1.2 equiv.) was suspended in dry THF (32 mL, 0.3 M). Trimethyl phosphonoacetate (1.67 mL, 11.53 mmol, 1.2 equiv.) was then added slowly at room temperature. After 5 min, 2-naphthaldehyde (1.5 g, 9.6 mmol, 1.0 equiv.) was added to reaction mixture. The reaction mixture was then heated to reflux (66 °C) overnight. After completion, the reaction was allowed to cool down to room temperature, it was partitioned with H<sub>2</sub>O (50 mL) and extracted with EtOAc (3 x 50 mL). The combined organic layers were dried over Na<sub>2</sub>SO<sub>4</sub> and concentrated *in vacuo*. The crude mixture was purified by column chromatography on silica gel (95:5 hexanes:EtOAc)

<sup>23</sup> Rozsar, D., Farley, A. J.M., McLauchlan, I., Shennan, B.D.A., Yamazaki, K., Dixon, D.J. *Angew. Chem. Int. Ed.* **2023**, *62*, e2023033.

to afford methyl (*E*)-3-(naphthalene-1-yl)acrylate **13g** as a colorless oil (1.7 g, 84%). NMR data matches the ones reported in the literature.<sup>24</sup>

<sup>1</sup>H NMR (600 MHz, CDCl<sub>3</sub>) δ 8.54 (d, *J* = 15.8 Hz, 1H), 8.21 (dd, *J* = 8.5, 1.0 Hz, 1H), 7.89 (m, 2H), 7.88 (dt, *J* = 7.2, 1.0 Hz, 1H), 7.59 (ddd, *J* = 8.4, 6.8, 1.5 Hz, 1H), 7.54 (ddd, *J* = 8.0, 6.8, 1.2 Hz, 1H), 7.49 (ddd, *J* = 7.98, 7.7, 0.5 Hz, 1H), 6.54 (d, *J* 15.7 Hz, 1H), 3.86 (s, 3H).

### Methyl (*E*)-3-(pyridine-2-yl)but-2-enoate (**13s**)

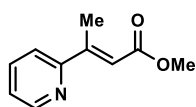

Following **Method A** from the general procedures for the synthesis of  $\alpha,\beta$ -unsaturated esters, in a flame-dried round bottom flask under Argon atmosphere, sodium hydride (594 mg, 24.76 mmol, 1.2 equiv.) was suspended in dry THF (70 mL, 0.3 M). Trimethyl phosphonoacetate (3.6 mL, 24.76 mmol, 1.2 equiv.) was then added slowly at room temperature. After 5 min, 1-(pyridine-2-yl)ethan-1-one (2.3 mL, 1.0 equiv.) was added to reaction mixture. The reaction mixture was then heated to reflux (66 °C) overnight. After completion, the reaction was allowed to cool down to room temperature, it was partitioned with H<sub>2</sub>O (40 mL) and extracted with EtOAc (3 x 50 mL). The combined organic layers were dried over Na<sub>2</sub>SO<sub>4</sub> and concentrated *in vacuo*. The crude mixture was purified by column chromatography on silica gel (60:40 hexanes:EtOAc) to afford methyl (*E*)-3-(pyridine-2-yl)but-2-enoate **13s** as a colorless oil (2.34 g, 64%).

<sup>1</sup>H NMR (600 MHz, CDCl<sub>3</sub>) δ 8.64 (ddd, *J* = 4.7, 1.9, 1.0, 1H), 7.71 (td, *J* = 7.8, 7.7, 1.8 Hz, 1H), 7.55 (td, *J* = 8.0, 1.0 Hz, 1H), 7.28 – 7.25 (m, 1H), 6.70 (m, 1H), 3.78 (s, 3H), 2.63 (d, *J* = 1.4 Hz, 3H).

<sup>13</sup>C NMR (150 MHz, CDCl<sub>3</sub>) δ 167.5, 158.1, 153.6, 149.4, 136.8, 123.7, 121.1, 118.9, 51.4, 16.2.

HRMS: Calculated [M-H]<sup>+</sup> for C<sub>10</sub>H<sub>12</sub>NO<sub>2</sub><sup>+</sup>: 178.0863, found: 178.0870.

FTIR (cm<sup>-1</sup>): 3053, 3001, 2949, 1713, 1634, 1581, 1567, 1432, 1345, 1278, 1167, 1152, 1031, 785, 744.

### Methyl (*E*)-3-(pyridine-3-yl)but-2-enoate (**13t**)

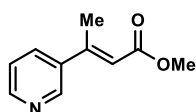

Following **Method A** from the general procedures for the synthesis of  $\alpha,\beta$ -unsaturated esters, in a flame-dried round bottom flask under Argon atmosphere, sodium hydride (594 mg, 24.76 mmol, 1.2 equiv.) was suspended in dry THF (70 mL, 0.3 M). Trimethyl phosphonoacetate (3.6 mL, 24.76 mmol, 1.2 equiv.) was then added slowly at room temperature. After 5 min, 1-(pyridine-2-yl)ethan-1-one (2.3 mL, 1.0 equiv.) was added to reaction mixture. The reaction mixture was then heated to reflux (66 °C) overnight. After completion, the reaction was allowed to cool down to room temperature, it was partitioned with H<sub>2</sub>O (40 mL) and extracted with EtOAc (3 x 50 mL). The combined organic layers were dried over Na<sub>2</sub>SO<sub>4</sub> and concentrated *in vacuo*. The crude mixture was purified by column chromatography on silica gel (60:40 hexanes:EtOAc) to afford methyl (*E*)-3-(pyridine-3-yl)but-2-enoate **13t** as a light yellow oil (2.127 g, 58%).

<sup>1</sup>H NMR (600 MHz, CDCl<sub>3</sub>) δ 8.73 (d, *J* = 2.4, 0.9 Hz, 1H), 8.60 (dd, *J* = 4.8, 1.6 Hz, 1H), 7.75 (ddd, *J* = 8.0, 2.5, 1.6 Hz, 1H), 7.31 (ddd, *J* = 8.0, 4.8, 0.9 Hz, 1H), 6.15 (d, *J* = 1.4 Hz, 1H), 3.77 (s, 3H), 2.59 (d, *J* = 1.34 Hz, 3H).

<sup>24</sup> Martinez, A.M., Puet, A., Dominguez, G., Alonso, I., Castro-Biondo, R., Perez-Castells, J. *Org. Let.* **2023**, *25*, 5923–5928.

**<sup>13</sup>C NMR (150 MHz, CDCl<sub>3</sub>)** δ 166.9, 152.6, 150.2, 147.7, 137.8, 133.7, 123.4, 118.3m, 51.5, 17.9.

**HRMS:** Calculated [M-H]<sup>+</sup> for C<sub>10</sub>H<sub>12</sub>NO<sub>2</sub><sup>+</sup>: 178.0863, found: 178.0870.

**FTIR (cm<sup>-1</sup>):** 3033, 2950, 1713, 1627, 1435, 1347, 1279, 1193, 1164, 1020, 872, 807, 705.

### Methyl (*E*)-3-phenylbut-2-enoate (**13v**)

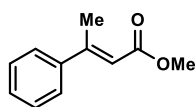

Following **Method A** from the general procedures for the synthesis of  $\alpha,\beta$ -unsaturated esters, in a flame-dried round bottom flask under Argon atmosphere, sodium hydride (400 mg, 10 mmol, 1.2 equiv.) was suspended in dry THF (30 mL, 0.3 M). Trimethyl phosphonoacetate (1.33 mL, 10 mmol, 1.2 equiv.) was then added slowly at room temperature. After 5 min, acetophenone (1.0 g, 8.3 mmol, 1.0 equiv.) was added to reaction mixture. The reaction mixture was then heated to reflux (66 °C) overnight. After completion, the reaction was allowed to cool down to room temperature, it was partitioned with H<sub>2</sub>O (50 mL) and extracted with EtOAc (3 x 50 mL). The combined organic layers were dried over Na<sub>2</sub>SO<sub>4</sub> and concentrated *in vacuo*. The crude mixture was purified by column chromatography on silica gel (95:5 hexanes:EtOAc) to afford methyl (*E*)-3-phenylbut-2-enoate **13v** as a yellow oil (1.1 g, 75%). NMR data matches the ones reported in the literature.<sup>25</sup>

**<sup>1</sup>H NMR (600 MHz, CDCl<sub>3</sub>)** δ 7.48 – 7.47 (m, 2H), 7.69 – 7.36 (m, 3H), 6.14 (d, *J* = 1.3 Hz, 1H), 3.76 (s, 3H), 2.58 (d, *J* = 1.3 Hz, 3H).

### Methyl 2-cycloheptylideneacetate (**13ad**)

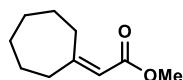

Following **Method A** from the general procedures for the synthesis of  $\alpha,\beta$ -unsaturated esters, in a flame-dried round bottom flask under Argon atmosphere, sodium hydride (614 mg, 15.3 mmol, 1.2 equiv.) was suspended in dry THF (42 mL, 0.3 M). Trimethyl phosphonoacetate (2.2 mL, 15.3 mmol, 1.2 equiv.) was then added slowly at room temperature. After 5 min, cycloheptanone (1.5 mL, 1.0 equiv.) was added to reaction mixture. The reaction mixture was then heated to reflux (66 °C) overnight. After completion, the reaction was allowed to cool down to room temperature, it was partitioned with H<sub>2</sub>O (40 mL) and extracted with EtOAc (3 x 50 mL). The combined organic layers were dried over Na<sub>2</sub>SO<sub>4</sub> and concentrated *in vacuo*. The crude mixture was purified by column chromatography on silica gel (95:5 hexanes:EtOAc) to afford methyl 2-cycloheptylideneacetate **13ad** as a colorless oil (1.704 g, 80%).

**<sup>1</sup>H NMR (600 MHz, CDCl<sub>3</sub>)** δ 5.67 (p, *J* = 1.3 Hz, 1H), 3.67 (s, 3H), 2.88 – 2.86 (m, 2H), 2.38 – 2.36 (m, 2H), 1.70 – 1.62 (m, 4H), 1.95 – 1.49 (m, 4H).

**<sup>13</sup>C NMR (150 MHz, CDCl<sub>3</sub>)** δ 167.3, 167.2, 115.3, 50.9, 39.1, 32.2, 30.0, 29.2, 28.2, 26.7.

**HRMS:** Calculated [M-H]<sup>+</sup> for C<sub>10</sub>H<sub>17</sub>O<sub>2</sub><sup>+</sup>: 169.1123, found: 169.1225.

**FTIR (cm<sup>-1</sup>):** 2924, 2853, 1714, 1634, 1433, 1379, 1194, 1174, 1145, 1027, 722.

### Methyl 2-cyclohexylideneacetate (**13ae**)

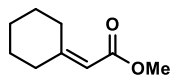

Following **Method A** from the general procedures for the synthesis of  $\alpha,\beta$ -unsaturated esters, in a flame-dried round bottom flask under Argon atmosphere, sodium hydride

<sup>25</sup> Pugliese, G., Vaghi, F., Lonardi, G., Licini, G., Orlandi, M., *Eur. J. Org. Chem.* **2023**, 26, e202201492.

(1.53 g, 38.2 mmol, 1.2 equiv.) was suspended in dry THF (250 mL, 0.1 M). Trimethyl phosphonoacetate (5.5 mL, 38.2 mmol, 1.2 equiv.) was then added slowly at room temperature. After 5 min, cyclohexanone (2.64 mL, 1.0 equiv.) was added to reaction mixture. The reaction mixture was then heated to reflux (66 °C) overnight. After completion, the reaction was allowed to cool down to room temperature, it was partitioned with H<sub>2</sub>O (200 mL) and extracted with EtOAc (3 x 300 mL). The combined organic layers were dried over Na<sub>2</sub>SO<sub>4</sub> and concentrated *in vacuo*. The crude mixture was purified by column chromatography on silica gel (95:5 hexanes:EtOAc) to afford methyl 2-cyclohexylideneacetate **13ae** as a colorless oil (1.7 g, 43%). NMR data matches the ones reported in the literature.<sup>26</sup>

<sup>1</sup>H NMR (600 MHz, CDCl<sub>3</sub>) δ 5.60 (p, *J* = 1.2 Hz, 1H), 3.68 (s, 3H), 2.83 – 2.81 (m, 2H), 2.20 – 2.18 (m, 2H), 1.67 – 1.57 (m, 6H).

### Methyl 2-cyclopentylideneacetate (13af)

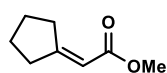

Following **Method A** from the general procedures for the synthesis of  $\alpha,\beta$ -unsaturated esters, in a flame-dried round bottom flask under Argon atmosphere, sodium hydride (541 mg, 13.5 mmol, 1.2 equiv.) was suspended in dry THF (38 mL, 0.3 M). Trimethyl phosphonoacetate (2.0 mL, 13.5 mmol, 1.2 equiv.) was then added slowly at room temperature. After 5 min, cyclopentanone (1.0 mL, 11.3 mmol, 1.0 equiv.) was added to reaction mixture. The reaction mixture was then heated to reflux (66 °C) overnight. After completion, the reaction was allowed to cool down to room temperature, it was partitioned with H<sub>2</sub>O (40 mL) and extracted with EtOAc (3 x 50 mL). The combined organic layers were dried over Na<sub>2</sub>SO<sub>4</sub> and concentrated *in vacuo*. The crude mixture was purified by column chromatography on silica gel (95:5 hexanes:EtOAc) to afford methyl 2-cyclopentylideneacetate **13af** as a colorless oil (1.473 g, 93%). NMR data matches the ones reported in the literature.<sup>27</sup>

<sup>1</sup>H NMR (600 MHz, CDCl<sub>3</sub>) δ 5.81 (s, 1H), 3.68 (s, 3H), 2.77 (t, *J* = 6.3 Hz, 2H), 2.44 (t, *J* = 7.2 Hz, 2H), 1.77 – 1.72 (m, 2H), 1.68 – 1.64 (m, 2H).

### Methyl 2-cyclobutylideneacetate (13ag)

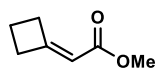

Following **Method A** from the general procedures for the synthesis of  $\alpha,\beta$ -unsaturated esters, in a flame-dried round bottom flask under Argon atmosphere, sodium hydride (1.72 g, 42.8 mmol, 1.2 equiv.) was suspended in dry THF (119 mL, 0.3 M). Trimethyl phosphonoacetate (6.2 mL, 42.8 mmol, 1.2 equiv.) was then added slowly at room temperature. After 5 min, cyclobutanone (2.67 mL, 35.67 mmol, 1.0 equiv.) was added to reaction mixture. The reaction mixture was then heated to reflux (66 °C) overnight. After completion, the reaction was allowed to cool down to room temperature, it was partitioned with H<sub>2</sub>O (100 mL) and extracted with EtOAc (3 x 120 mL). The combined organic layers were dried over Na<sub>2</sub>SO<sub>4</sub> and concentrated *in vacuo*. The crude mixture was purified by column chromatography on silica gel (95:5 hexanes:EtOAc) to afford methyl 2-cyclobutylideneacetate **13ag** as a colorless oil (1.8 g, 40%). NMR data matches the ones reported in the literature.<sup>28</sup>

<sup>26</sup> Jager, C., Haase, M., Koschorreck, K., Urlacher, V.B., DEska, J., *Angew. Chem. Int. Ed.* **2023**, *62*, e202213671.

<sup>27</sup> Tadros, J., Dankers, C., Aldrich-Wright, J.R., Polyzos, A., Gordon, C.P. *Eur. J. Org., Chem.* **2021**, 4184–4194.

<sup>28</sup> Goti, A., Brandi, A., De Sarlo, F., Guarna, A. *Tetrahedron.* **1992**, *48*, 5283–5300.

$^1\text{H NMR}$  (600 MHz,  $\text{CDCl}_3$ )  $\delta$  5.59 (p,  $J = 2.3$  Hz, 1H), 3.68 (s, 3H), 3.12 (dddd,  $J = 8.0, 7.0, 2.4, 1.2$  Hz, 2H), 2.84 (dddd,  $J = 9.3, 6.9, 2.2, 1.1$  Hz, 2H), 2.09 (p,  $J = 8.0$  Hz, 2H).

#### Methyl 2-(tetrahydro-4H-pyran-4-ylidene)acetate (13ai)

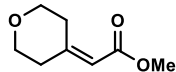

Following **Method A** from the general procedures for the synthesis of  $\alpha,\beta$ -unsaturated esters, in a flame-dried round bottom flask under Argon atmosphere, sodium hydride (719 mg, 18 mmol, 1.2 equiv.) was suspended in dry THF (50 mL, 0.3 M). Trimethyl phosphonoacetate (2.6 mL, 18 mmol, 1.2 equiv.) was then added slowly at room temperature. After 5 min, tetrahydro-4H-pyran-4-one (1.03 mL, 15 mmol, 1.0 equiv.) was added to reaction mixture. The reaction mixture was then heated to reflux (66 °C) overnight. After completion, the reaction was allowed to cool down to room temperature, it was partitioned with  $\text{H}_2\text{O}$  (50 mL) and extracted with EtOAc (3 x 60 mL). The combined organic layers were dried over  $\text{Na}_2\text{SO}_4$  and concentrated *in vacuo*. The crude mixture was purified by column chromatography on silica gel (95:5 hexanes:EtOAc) to afford methyl 2-(tetrahydro-4H-pyran-4-ylidene)acetate **13ai** as a colorless oil (1.051 g, 45%). NMR data matches the ones reported in the literature.<sup>29</sup>

$^1\text{H NMR}$  (600 MHz,  $\text{CDCl}_3$ )  $\delta$  5.68 (s, 1H), 3.77 (t,  $J = 5.5$  Hz, 2H), 3.73 (t,  $J = 5.5$  Hz, 2H), 3.69 (s, 3H), 3.01 (t,  $J = 5.6$  Hz, 2H), 2.33 (t,  $J = 5.6$  Hz, 2H).

#### Ethyl 4-methylpent-4-enoate (13ak)

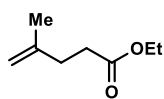

In a flame-dried round-bottom flask under Argon atmosphere, NaH (720 mg, 60% in mineral oil, 1.2 equiv.) was suspended in dry  $\text{Et}_2\text{O}$  (75 mL, 0.2 M). The reaction mixture was then cooled down to 0 °C using an ice-water cooling bath under vigorous stirring. Methyltriphenylphosphonium bromide (6.43 g, 1.2 equiv.) was added and allowed to stir for 30 min until bubbling ceased. The reaction mixture was then heated to reflux overnight (16 h). The reaction turned bright yellow. Then levulinic acid ethyl ester (2.16 g, 15 mmol) was added and the reaction was left heating at reflux for 16 h. The bright yellow color disappeared and a white precipitate was formed. The reaction mixture was allowed to cool down to room temperature. The solids were filtered and washed thrice with  $\text{Et}_2\text{O}$  (10 mL). The filtrate was then concentrated *in vacuo*. The crude reaction mixture was purified by column chromatography on silica gel (95/05 hexanes: $\text{Et}_2\text{O}$ ) to afford Ethyl 4-methylpent-4-enoate **12ak** as colorless oil (1.43 g, 67%).

$^1\text{H NMR}$  (600 MHz,  $\text{CDCl}_3$ )  $\delta$  4.74 (s, 1H), 4.69 (s, 1H), 4.13 (q,  $J = 7.1$  Hz, 2H), 2.45 (dd,  $J = 8.8, 6.4$  Hz, 2H), 2.34 (dd,  $J = 9.0, 6.5$  Hz, 2H), 1.74 (s, 3H), 1.25 (t,  $J = 7.1$  Hz, 3H).

$^{13}\text{C NMR}$  (150 MHz,  $\text{CDCl}_3$ )  $\delta$  173.5, 144.3, 110.5, 60.5, 32.8, 32.8, 22.6, 14.4.

**HRMS:** Calculated  $[\text{M}-\text{H}]^+$  for  $\text{C}_8\text{H}_{15}\text{O}_2^+$ : 143.1067, found: 143.1065.

**FTIR** ( $\text{cm}^{-1}$ ): 3078, 2952, 2924, 2855, 1737, 1446, 1371, 1231, 1154, 1030, 888.

<sup>29</sup> Kuehne, M.E., Bornmann, W.G., Marko, I., Qin, Y., LeBoulluec, K.L., Frasier, D.A., Xu, F., Mulamba, T., Ensinger, C.L., Borman, L.S., Huot, A.E., Exon, C., Bizzaro, F.T., Cheung, J.B., Bane, S.L. *Org. Biomol. Chem.* **2003**, *1*, 2120–2136.

## 15. Synthesis and characterization of $\alpha,\beta$ -unsaturated aldehydes (**14**):

### (*E*)-2-benzylidenehexanal (**14m**)

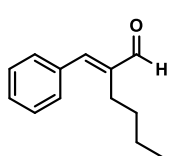

Following **Method A** from the general procedures for the synthesis of  $\alpha,\beta$ -unsaturated aldehydes, (*Z*)-2-bromo-3-phenylacrylaldehyde (5.0 g, 23.7 mmol), *n*-butylboronic acid (3.87 g, 37.9 mmol, 1.6 equiv.),  $K_2CO_3$  (9.83 g, 71.1 mmol, 3.0 equiv.) and  $Pd(PPh_3)_4$  (548 mg, 0.474 mmol, 2 mol%) were dissolved in a 7:3 mixture of Toluene:H<sub>2</sub>O (80 mL, 0.3 M) and heated to 100 °C overnight under Argon atmosphere. After completion, the reaction was quenched with 50 mL of H<sub>2</sub>O and extracted with EtOAc (50 mL x 3). The combined organic layers were dried over  $Na_2SO_4$  and concentrated *in vacuo*. The crude reaction mixture was purified by flash column chromatography (Hexane/EtOAc = 90/10) to afford (*E*)-2-benzylidenehexanal **14m** as a yellow-orange oil (1.360 g, 30%). NMR data matches the ones reported in the literature.<sup>30</sup>

<sup>1</sup>H NMR (600 MHz,  $CDCl_3$ )  $\delta$  9.55 (s, 1H), 7.51 – 7.49 (m, 2H), 7.46 – 7.44 (m, 2H), 7.41 – 7.38 (m, 1H), 7.21 (s, 1H), 2.55 – 2.52 (m, 2H), 1.51 – 1.46 (m, 2H), 1.44 – 1.38 (m, 2H), 0.93 (t, 3H,  $J = 7.24$  Hz).

<sup>13</sup>C NMR (150 MHz,  $CDCl_3$ )  $\delta$  159.9, 149.9, 129.8, 129.7, 128.9, 30.6, 24.7, 23.2, 14.0.

### (*E*)-3-phenyl-2-(pyridine-3-yl)acrylaldehyde (**14n**)

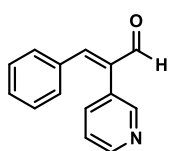

Following **Method A** from the general procedures for the synthesis of  $\alpha,\beta$ -unsaturated aldehydes, (*Z*)-2-bromo-3-phenylacrylaldehyde (3.0 g, 14.21 mmol), pyridin-3-ylboronic acid (1.92 g, 15.64 mmol, 1.1 equiv.),  $K_2CO_3$  (5.9 g, 42.6 mmol, 3.0 equiv.) and  $Pd(PPh_3)_4$  (329 mg, 0.284 mmol, 2 mol%) were dissolved in a 7:3 mixture of Toluene:H<sub>2</sub>O (47 mL, 0.3 M) and heated to 100 °C overnight under Argon atmosphere. After completion, the reaction was quenched with 40 mL of H<sub>2</sub>O and extracted with EtOAc (50 mL x 3). The combined organic layers were dried over  $Na_2SO_4$  and concentrated *in vacuo*. The crude reaction mixture was purified by flash column chromatography (Hexane/EtOAc = 50/50) to afford (*E*)-3-phenyl-2-(pyridine-3-yl)acrylaldehyde **14n** as a white-off solid (1.4 g, 47%).

<sup>1</sup>H NMR (600 MHz,  $CDCl_3$ )  $\delta$  9.90 (s, 1H), 8.63 (dd,  $J = 4.9, 1.7$  Hz, 1H), 8.43 (d,  $J = 1.4$  Hz), 7.58 (dt,  $J = 7.8, 2.0$  Hz, 1H), 7.51 (s, 1H), 7.36 (ddd,  $J = 7.8, 4.9, 0.9$  Hz, 1H), 7.35 – 7.32 (m, 1H), 7.28 – 7.26 (m, 2H), 7.21 – 7.20 (m, 2H).

<sup>13</sup>C NMR (150 MHz,  $CDCl_3$ )  $\delta$  193.3, 151.9, 150.4, 149.6, 148.4, 137.5, 133.6, 130.8, 130.8, 129.0, 128.9, 123.7.

**HRMS:** Calculated  $[M+H]^+$  for  $C_{14}H_{12}NO^+$ : 210.0913, found: 210.0916

**Melting Point:** 93.8 – 96.2 °C

**FTIR ( $cm^{-1}$ ):** 3056, 2948, 2845, 2727, 1676, 1623, 1563, 1406, 1313, 1223, 1099, 1070, 1024, 931, 732.

<sup>30</sup> Liu, J., Wen, X., Qin, C., Li, X., Luo, X., Sun, A., Zhu, B., Song, S., Jiao, N. *Angew. Chem. Int. Ed.* **2017**, 56, 11940–11944.

### (E)-2-(2-methoxyphenyl)-3-phenylacrylaldehyde (14o)

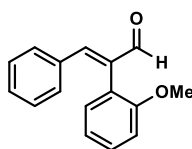

Following **Method A** from the general procedures for the synthesis of  $\alpha,\beta$ -unsaturated aldehydes, (*Z*)-2-bromo-3-phenylacrylaldehyde (5.0 g, 23.07 mmol), (2-methoxyphenyl)boronic acid (3.96 g, 26.07 mmol, 1.1 equiv.),  $K_2CO_3$  (9.83 g, 71.1 mmol, 3.0 equiv.) and  $Pd(PPh_3)_4$  (548 mg, 0.474 mmol, 2 mol%) were dissolved in a 7:3 mixture of Toluene:H<sub>2</sub>O (80 mL, 0.3 M) and heated to 100 °C overnight under Argon atmosphere.

After completion, the reaction was quenched with 50 mL of H<sub>2</sub>O and extracted with EtOAc (50 mL x 3). The combined organic layers were dried over  $Na_2SO_4$  and concentrated *in vacuo*. The crude reaction mixture was purified by flash column chromatography (Hexane/EtOAc = 90/10) to afford (*E*)-2-(2-methoxyphenyl)-3-phenylacrylaldehyde **14o** as a colorless oil (3.71 g, 68%).

<sup>1</sup>H NMR (600 MHz, CDCl<sub>3</sub>)  $\delta$  9.75 (s, 1H), 7.47 (s, 1H), 7.41 – 7.38 (m, 1H), 7.30 – 7.27 (m, 1H), 7.25 – 7.21 (m, 4H), 7.04 (ddd, *J* = 7.3, 2.0, 0.7 Hz, 1H), 7.01 – 6.98 (m, 2H), 3.69 (s, 3H).

<sup>13</sup>C NMR (150 MHz, CDCl<sub>3</sub>)  $\delta$  193.9, 157.2, 149.8, 139.1, 134.7, 130.8, 130.5, 130.2, 130.1, 128.6, 123.0, 121.3, 121.3, 111.6, 55.8.

HRMS: Calculated [M+H]<sup>+</sup> for C<sub>16</sub>H<sub>15</sub>O<sub>2</sub><sup>+</sup>: 239.1067, found: 239.1078

FTIR (cm<sup>-1</sup>): 3059, 3008, 2938, 2835, 1679, 1624, 1596, 1492, 1245, 1067, 1023, 749, 688.

### (E)-2-(4-methoxyphenyl)-3-phenylacrylaldehyde (14p)

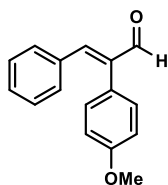

Following **Method A** from the general procedures for the synthesis of  $\alpha,\beta$ -unsaturated aldehydes, (*Z*)-2-bromo-3-phenylacrylaldehyde (5.0 g, 23.07 mmol), (4-methoxyphenyl)boronic acid (3.96 g, 26.07 mmol, 1.1 equiv.),  $K_2CO_3$  (9.83 g, 71.1 mmol, 3.0 equiv.) and  $Pd(PPh_3)_4$  (548 mg, 0.474 mmol, 2 mol%) were dissolved in a 7:3 mixture of Toluene:H<sub>2</sub>O (80 mL, 0.3 M) and heated to 100 °C overnight under Argon atmosphere.

After completion, the reaction was quenched with 50 mL of H<sub>2</sub>O and extracted with EtOAc (50 mL x 3). The combined organic layers were dried over  $Na_2SO_4$  and concentrated *in vacuo*. The crude reaction mixture was purified by flash column chromatography (Hexane/EtOAc = 90/10) to afford (*E*)-2-(4-methoxyphenyl)-3-phenylacrylaldehyde **14p** as an off-white solid (3.26 g, 59%). NMR data matches the ones reported in the literature.<sup>31</sup>

<sup>1</sup>H NMR (600 MHz, CDCl<sub>3</sub>)  $\delta$  9.77 (s, 1H), 7.35 (s, 1H), 7.32 – 7.29 (m, 1H), 7.28 – 7.25 (m, 4H), 7.14 (d, *J* = 8.7 Hz, 2H), 6.95 (d, *J* = 8.7 Hz, 2H), 3.85 (s, 3H).

### (E)-2,3-diphenylacrylaldehyde (14q)

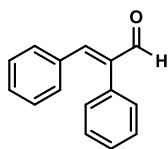

Following **Method A** from the general procedures for the synthesis of  $\alpha,\beta$ -unsaturated aldehydes, (*Z*)-2-bromo-3-phenylacrylaldehyde (1.0 g, 4.74 mmol), phenylboronic acid (595 mg, 4.88 mmol, 1.1 equiv.),  $K_2CO_3$  (1.965 g, 14.22 mmol, 3.0 equiv.) and  $Pd(PPh_3)_4$  (110 mg, 0.095 mmol, 2 mol%) were dissolved in a 7:3 mixture of Toluene:H<sub>2</sub>O (16 mL, 0.3 M) and heated to 100 °C overnight under Argon atmosphere. After completion, the reaction was quenched with 5 mL of H<sub>2</sub>O and extracted with EtOAc (20 mL x 3). The combined organic

<sup>31</sup> Chuang, T.H., Chang, W.Y., Li, C.F., Wen, T.C., Tsai, C.C. *J. Org. Chem.* **2011**, *76*, 9678–9686.



layers were dried over Na<sub>2</sub>SO<sub>4</sub> and concentrated *in vacuo*. The crude reaction mixture was purified by flash column chromatography (Hexane/EtOAc = 90/10) to afford (*E*)-2,3-diphenylacrylaldehyde **14q** as a white solid (756 mg, 76%). NMR data matches the ones reported in the literature.<sup>32</sup>

<sup>1</sup>H NMR (600 MHz, CDCl<sub>3</sub>) δ 9.78 (s, 1H), 7.43 – 7.39 (m, 4H), 7.31 – 7.28 (m, 1H), 7.25 – 7.19 (m, 6H).

<sup>13</sup>C NMR (150 MHz, CDCl<sub>3</sub>) δ 194.1, 150.3, 142.0, 134.2, 133.5, 130.9, 130.4, 1219.5, 129.0, 1128.7, 128.5.

### (*E*)-2-(4-nitrophenyl)-3-phenylacrylaldehyde (**14r**)

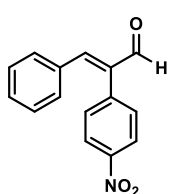

Following **Method A** from the general procedures for the synthesis of α,β-unsaturated aldehydes, (*Z*)-2-bromo-3-phenylacrylaldehyde (5.0 g, 23.07 mmol), (2-nitrophenyl)boronic acid (4.35 g, 26.07 mmol, 1.1 equiv.), K<sub>2</sub>CO<sub>3</sub> (9.83 g, 71.1 mmol, 3.0 equiv.) and Pd(PPh<sub>3</sub>)<sub>4</sub> (548 mg, 0.474 mmol, 2 mol%) were dissolved in a 7:3 mixture of Toluene:H<sub>2</sub>O (80 mL, 0.3 M) and heated to 100 °C overnight under Argon atmosphere.

After completion, the reaction was quenched with 50 mL of H<sub>2</sub>O and extracted with EtOAc (50 mL x 3). The combined organic layers were dried over Na<sub>2</sub>SO<sub>4</sub> and concentrated *in vacuo*. The crude reaction mixture was purified by flash column chromatography (Hexane/EtOAc = 60/40) to afford (*E*)-2-(2-nitrophenyl)-3-phenylacrylaldehyde **14r** as a white solid (2.42 g, 40%).

<sup>1</sup>H NMR (600 MHz, CDCl<sub>3</sub>) δ 9.78 (s, 1H), 8.27 (d, *J* = 8.9 Hz, 2H), 7.52 (s, 1H), 7.40 (d, *J* = 8.9 Hz, 2H), 7.37 – 7.34 (m, 1H), 7.29 – 7.27 (m, 2H), 7.18 – 7.17 (m, 2H).

<sup>13</sup>C NMR (150 MHz, CDCl<sub>3</sub>) δ 192.7, 151.9, 147.9, 140.5, 139.9, 133.3, 131.1, 130.9, 130.8, 129.0, 124.1.

HRMS: Calculated [M+H]<sup>+</sup> for C<sub>15</sub>H<sub>12</sub>NO<sub>3</sub><sup>+</sup>: 254.0812, found: 254.0817

**Melting Point:** 131.9 – 135.9 °C

**FTIR (cm<sup>-1</sup>):** 3113, 3053, 2836, 1667, 1632, 1510, 1343, 1322, 1107, 1088, 931, 857, 716, 687.

### 3,3-diphenylacrylaldehyde (**14u**)

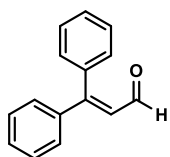

Following a modified literature procedure<sup>33</sup>, bromobenzene (1.47 g, 1.4 mmol, 1.05 equiv.), sodium acetate (843 mg, 10.3 mmol, 1.1 equiv.), and Pd(OAc)<sub>2</sub> (20 mg, 1 mol%) and were dissolved in *N*-methylpyrrolidine (12 mL, 0.75 M) and then cinnamaldehyde (1.182 g, 8.94 mmol, 1.0 equiv.) was added. The reaction mixture was heated to 120 °C overnight under Argon atmosphere. After completion, the reaction was quenched with 10 mL of H<sub>2</sub>O and extracted with EtOAc (25 mL x 3). The combined organic layers were dried over Na<sub>2</sub>SO<sub>4</sub> and concentrated *in vacuo*. The crude reaction mixture was purified by flash column chromatography (Hexane/EtOAc = 90/10) to afford 3,3-diphenylacrylaldehyde **14u** as a white solid (686 mg, 37%). NMR data matches the ones reported in the literature.<sup>34</sup>

<sup>1</sup>H NMR (600 MHz, CDCl<sub>3</sub>) δ 9.53 (d, *J* = 8.0 Hz, 1H), 7.50 – 7.42 (d, 4H), 7.40 – 7.35 (m, 4H), 7.32 – 7.30 (d, 2H), 6.60 (d, *J* = 8.0 Hz, 1H)

<sup>32</sup> Liu, J., Wen, X., Qin, C., Li, X., Luo, X., Sun, A., Zhu, B., Song, S., Jiao, N. *Angew. Chem. Int. Ed.* **2017**, 56, 11940–11944.

<sup>33</sup> Zhdanko, A., Schmauder, A., Ma, C.I., Sibley, L. D., Sept, D., Sasse, F., Maier, M.E. *Chem. Eur. J.* **2011**, 17, 13349–13357.

<sup>34</sup> Li, J., Tan, C., Gong, J., Yang, Z. *Org. Lett.* **2014**, 61, 5370–5373.

### **tert-Butyl 3-formyl-1H-indole-1-carboxylate (14ac)**

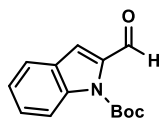

Indole-3-carboxaldehyde (5 g, 34.4 mmol) was dissolved in dry MeCN (344 mL, 0.2 M). Then Boc<sub>2</sub>O (9.77 g, 44.8 mmol, 1.3 eq.) and DMAP (1.4 g, 11.5 mmol, 0.33 eq.) were added. The reaction was left stirring for 1 hour at room temperature. After completion, the reaction mixture was partitioned in 500 mL of a 1:1 mixture of DCM:H<sub>2</sub>O and the organic layer was separated. The organic layer was dried over Na<sub>2</sub>SO<sub>4</sub>. Evaporation of the solvent afforded *tert*-Butyl 3-formyl-1H-indole-1-carboxylate **14ac** as an off-white solid (7.67 g, 41%). NMR data matches the ones reported in the literature.<sup>35</sup>

<sup>1</sup>H NMR (600 MHz, CDCl<sub>3</sub>) δ 10.11 (s, 1H), 8.29 (m, 1H), 8.24 (s, 1H), 8.15 (d, *J* = 8.2 Hz, 1H), 7.42 (ddd, *J* = 8.4, 7.2, 1.4 Hz, 1H), 7.38 (td, *J* = 7.6, 7.2, 1.1 Hz, 1H), 1.71 (s, 9H).

### **16. Procedures and characterization of functionalized β-lactams:**

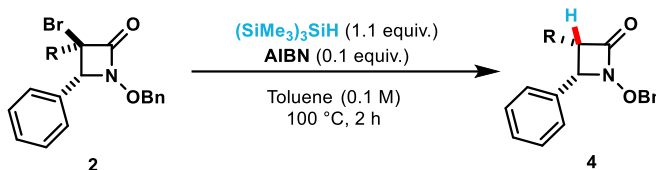

### **rac-1-(benzyloxy)-4-phenylazetidin-2-one (4b)**

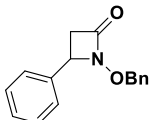

In a flame-dried round-bottom flask, compound **2b** (332 mg, 1.0 mmol) and AIBN (16 mg, 0.1 equiv.) were dissolved in dry Toluene (10 mL, 0.1 M) under Argon atmosphere. (SiMe)<sub>3</sub>SiH (0.34 mL, 1.1 equiv.) was added and the reaction mixture was heated to 100 °C for 2 h. After completion, the reaction was allowed to cool down to room temperature, and then it was concentrated *in vacuo*. The crude reaction mixture was purified by column chromatography on silica gel (80/20 hexanes:EtOAc) to afford *rac*-1-(benzyloxy)-4-phenylazetidin-2-one **4b** as a pale-yellow oil (189 mg, 79%).

<sup>1</sup>H NMR (600 MHz, CDCl<sub>3</sub>) δ 7.37 – 7.28 (m, 8H), 7.26 – 7.25 (m, 2H), 4.94 (d, *J* = 11.3 Hz, 1H), 4.86 (d, *J* = 11.3 Hz, 1H), 4.50 (dd, *J* = 5.5, 2.5 Hz, 1H), 3.08 (dd, *J* = 13.9, 5.5 Hz, 1H), 2.60 (dd, *J* = 13.9, 2.5 Hz, 1H).

<sup>13</sup>C NMR (150 MHz, CDCl<sub>3</sub>) δ 164.8, 137.3, 135.3, 129.1, 129.0, 129.0, 128.8, 128.7, 126.7, 78.2, 60.6, 42.2.

HRMS: Calculated [M+H]<sup>+</sup> for C<sub>16</sub>H<sub>16</sub>NO<sub>2</sub><sup>+</sup>: 254.1176, found: 254.11777.

FTIR (cm<sup>-1</sup>): 3080, 3062, 3033, 2953, 2881, 1766, 1496, 1455, 1365, 1036, 971, 742, 694.

### **rac-1-(benzyloxy)-3-methyl-4-phenylazetidin-2-one (4m)**

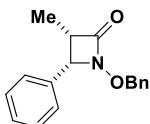

In a flame-dried round-bottom flask, compound **2m** (509 mg, 1.5 mmol) and AIBN (24 mg, 0.1 equiv.) were dissolved in dry Toluene (15 mL, 0.1 M) under Argon atmosphere. (SiMe)<sub>3</sub>SiH (0.50 mL, 1.1 equiv.) was added and the reaction mixture was heated to 100 °C

<sup>35</sup> Loy, N.S.Y., Singh, A., Xu, X., Park, C. *Angew. Chem. Int. Ed.* **2013**, *52*, 2212–2216.

for 2 h. After completion, the reaction was allowed to cool down to room temperature, and then it was concentrated *in vacuo*. The crude reaction mixture was purified by column chromatography on silica gel (80/20 hexanes:EtOAc) to afford *rac*-1-(benzyloxy)-3-methyl-4-phenylazetidin-2-one **4m** as a colorless oil (308 mg, 78%).

$^1\text{H NMR}$  (600 MHz,  $\text{CDCl}_3$ )  $\delta$  7.38 – 7.31 (m, 8H), 7.20 – 7.18 (m, 2H), 5.05 (d,  $J = 11.2$  Hz, 1H), 4.99 (d,  $J = 11.1$  Hz, 1H), 4.69 (d,  $J = 5.6$  Hz, 1H), 3.20 (qd,  $J = 7.3, 5.2$  Hz, 1H), 0.78 (d,  $J = 7.4$  Hz, 3H).

$^{13}\text{C NMR}$  (150 MHz,  $\text{CDCl}_3$ )  $\delta$  167.6, 135.3, 134.7, 129.1, 128.7, 128.6, 128.3, 127.4, 77.9, 65.1, 45.5, 9.8.

**HRMS:** Calculated  $[\text{M}+\text{H}]^+$  for  $\text{C}_{17}\text{H}_{18}\text{NO}_2^+$ : 268.1332, found: 268.1337.

**FTIR** ( $\text{cm}^{-1}$ ): 3063, 3033, 2973, 2932, 1761, 1496, 1455, 1378, 1365, 1061, 950, 736, 696.

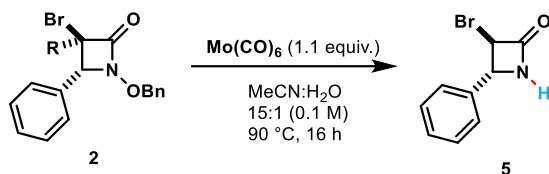

#### *rac*-3-bromo-4-phenylazetidin-2-one (**5b**)

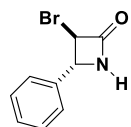

In a flame-dried round-bottom flask, compound **2b** (166 mg, 0.5 mmol) and  $\text{Mo}(\text{CO})_6$  (158 mg, 1.2 equiv.) were dissolved in a 1:1 mixture of  $\text{MeCN}:\text{H}_2\text{O}$  (2.5 mL, 0.2 M). The reaction mixture was heated to 100 °C for 16 h. After completion, the reaction was allowed to cool down to room temperature, and then it was concentrated *in vacuo*. The crude reaction mixture was purified by column chromatography on silica gel (80/20 hexanes:EtOAc) to afford *rac*-3-bromo-4-phenylazetidin-2-one **5b** as an off-white solid (49 mg, 43%). NMR data matches the ones reported in the literature.<sup>36</sup>

$^1\text{H NMR}$  (600 MHz,  $\text{CDCl}_3$ )  $\delta$  7.34 – 7.38 (m, 5H), 6.31 (bs, 1H), 4.83 (d,  $J = 2.0$  Hz, 1H), 4.57 (t,  $J = 2.0$  Hz, 1H).

$^{13}\text{C NMR}$  (150 MHz,  $\text{CDCl}_3$ )  $\delta$  164.0, 137.3, 129.4, 129.3, 125.8, 62.5, 51.5.

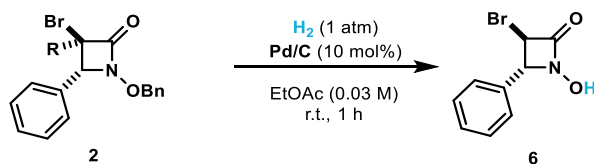

#### *rac*-3-bromo-1-hydroxy-4-phenylazetidin-2-one (**6b**)

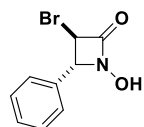

In a round-bottom flask, compound **2b** (332 mg, 1.0 mmol) was dissolved in EtOAc (33 mL, 0.03 M) and then 10 wt% Pd/C (77 mg) was added. The reaction mixture was purged with  $\text{N}_2$  for 30 min. Then it was evacuated and filled with 1 balloon of  $\text{H}_2$  (1 atm). The reaction was left stirring for 1 h. After completion, it was filtered over celite and the solvent was

<sup>36</sup> Bandini, E., Favi, G., Martelli, G., Panuzio, M., Piersanti, G. *Org. Lett.* **2000**, *2*, 1077–1079.

concentrated *in vacuo* to afford rac-3-bromo-1-hydroxy-4-phenylazetid-2-one **6b** as a pale-orange solid (160 mg, 66%) without further purification.

$^1\text{H NMR}$  (600 MHz,  $\text{CDCl}_3$ )  $\delta$  7.48 – 7.43 (m, 3H), 7.41 – 7.39 (m, 2H), 5.02 (d,  $J = 1.4$  Hz, 1H), 4.36 (d,  $J = 1.4$  Hz, 1H).

$^{13}\text{C NMR}$  (150 MHz,  $\text{CDCl}_3$ )  $\delta$  162.2, 133.6, 130.0, 129.5, 126.6, 72.9, 45.5.

**Melting Point:** 100.8 – 105.3 °C

**HRMS:** Calculated  $[\text{M}+\text{H}]^+$  for  $\text{C}_9\text{H}_9\text{BrNO}_2^+$ : 241.9812, found: 241.9813.

**FTIR** ( $\text{cm}^{-1}$ ): 3059, 3030, 2956, 2888, 2812, 1761, 1453, 1351, 1200, 1172, 1053, 956, 789, 756, 726, 692.

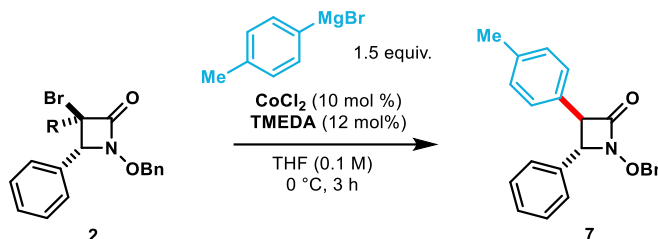

### rac-1-(benzyloxy)-4-phenyl-3-(*p*-tolyl)azetid-2-one (**7b**)

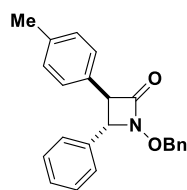

In a flame-dried round-bottom flask under Argon atmosphere, compound **2b** (166 mg, 0.5 mmol) was dissolved in dry THF (5.0 mL, 0.1 M). Then 1.0 mL of a 0.05 M solution of  $\text{CoCl}_2$  in THF (10 mol%) was added, followed by TMEDA (9  $\mu\text{L}$ , 12 mol%). The reaction mixture was cooled down to 0 °C using an ice/water bath. Then *p*-tolylmagnesium bromide (0.67 mL, 1.12 M in THF) was added *via* syringe pump (rate of addition = 40  $\mu\text{L}/\text{min}$ ). The reaction was then left stirring for 3 h after the addition was done still at 0 °C. After completion, the reaction was quenched with 5 mL of conc.  $\text{NH}_4\text{Cl}$  and extracted with EtOAc (15 mL x 3). The combined organic layers were dried over  $\text{Na}_2\text{SO}_4$  and concentrated *in vacuo*. The crude reaction mixture was purified by column chromatography on silica gel (80/20 hexanes:EtOAc) to afford rac-1-(benzyloxy)-4-phenyl-3-(*p*-tolyl)azetid-2-one **7b** as a colorless oil (96 mg, 54%).

$^1\text{H NMR}$  (600 MHz,  $\text{CDCl}_3$ )  $\delta$  7.41 – 7.33 (m, 8H), 7.30 – 7.28 (m, 2H), 7.12 (d,  $J = 7.6$  Hz, 2H), 6.99 (d,  $J = 8.0$  Hz, 2H), 5.06 (d,  $J = 11.4$  Hz, 1H), 4.95 (d,  $J = 11.4$  Hz, 1H), 4.40 (d,  $J = 2.2$  Hz, 1H), 3.85 (d,  $J = 2.2$  Hz, 1H), 2.33 (s, 3H).

$^{13}\text{C NMR}$  (150 MHz,  $\text{CDCl}_3$ )  $\delta$  165.3, 137.7, 136.6, 135.3, 131.0, 129.7, 129.3, 129.1, 128.9, 128.7, 127.4, 126.7, 78.2, 70.1, 60.6, 21.3.

**HRMS:** Calculated  $[\text{M}+\text{H}]^+$  for  $\text{C}_{23}\text{H}_{22}\text{NO}_2^+$ : 344.1645, found: 344.1653.

**FTIR** ( $\text{cm}^{-1}$ ): 3063, 3031, 2924, 1771, 1515, 1455, 1365, 1034, 957, 809, 742, 696.

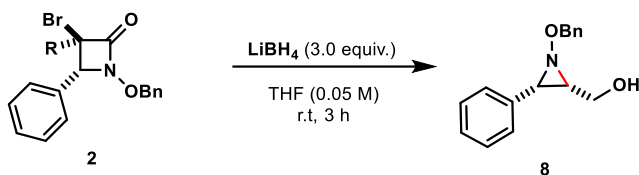

### ***rac*-1-(benzyloxy)-3-phenylaziridin-2-yl)methanol (8b)**

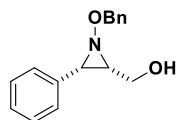

In a flame-dried round-bottom flask under Argon atmosphere, compound **2b** (166 mg, 0.5 mmol) was dissolved in dry THF (10.0 mL, 0.05 M). The reaction mixture was cooled down to 0 °C using an ice/water bath. Then a solution of LiBH<sub>4</sub> (0.27 mL, 4 M in THF) was added slowly. The reaction mixture was allowed to warm up to room temperature and was left stirring for 3 h. After completion, the reaction was quenched with 5 mL of distilled H<sub>2</sub>O and extracted with EtOAc (20 mL x 3). The combined organic layers were dried over Na<sub>2</sub>SO<sub>4</sub> and concentrated *in vacuo*. The crude reaction mixture was purified by column chromatography on silica gel (70/30 hexanes:EtOAc) to afford *rac*-1-(benzyloxy)-3-phenylaziridin-2-yl)methanol **8b** as a white crystalline solid (52.2 mg, 41%).

<sup>1</sup>H NMR (600 MHz, CDCl<sub>3</sub>) δ 7.44 – 7.43 (m, 2H), 7.36 – 7.33 (m, 3H), 7.21 – 7.18 (m, 3H), 6.89 – 6.87 (m, 2H), 4.90 (t, *J* = 5.7 Hz, 1H), 4.48 (d, *J* = 10.7 Hz, 1H), 4.13 (d, *J* = 10.7, 1H), 3.51 (ddd, *J* = 11.9, 5.6, 4.6 Hz, 1H), 3.41 (dt, *J* = 12.1, 6.2 Hz, 1H), 3.10 (d, *J* = 6.5 Hz, 1H), 2.95 (td, *J* = 6.5, 4.6 Hz, 1H).

<sup>13</sup>C NMR (150 MHz, CDCl<sub>3</sub>) δ 136.6, 132.4, 130.1, 128.4, 127.9, 127.6, 127.6, 127.5, 73.2, 60.9, 48.0, 47.1.

**Melting Point:** 89.8 – 91.0 °C

**HRMS:** Calculated [M+H]<sup>+</sup> for C<sub>16</sub>H<sub>17</sub>NO<sub>2</sub><sup>+</sup>: 256.1332, found: 256.1336.

**FTIR (cm<sup>-1</sup>):** 3310, 3060, 3033, 2935, 2918, 2876, 1454, 1375, 1217, 1056, 1017, 978, 871, 751, 697.

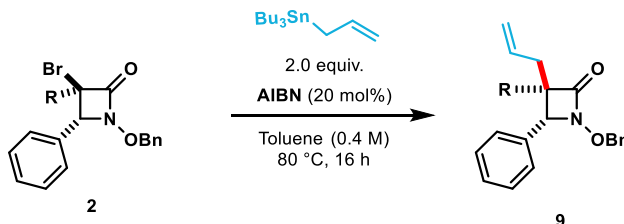

### ***rac*-3-allyl-1-(benzyloxy)-4-phenylazetidin-2-one (9b)**

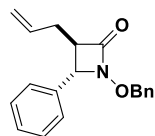

In a flame-dried round-bottom flask under Argon atmosphere, compound **2m** (69.2 mg, 0.2 mmol), AIBN (5.0 mg, 15 mol%) and allyltributyltin (132 mg, 2.0 equiv.) were dissolved in dry Toluene (0.5 mL, 0.4 M). Then the reaction was heated to 80 °C and left heating overnight. After completion, the reaction was allowed to cool down to room temperature and it was quenched with 1 mL of H<sub>2</sub>O. The reaction mixture was extracted with EtOAc (5 mL x 3) and the combined organic layers were dried over Na<sub>2</sub>SO<sub>4</sub>. The reaction mixture was then concentrated *in vacuo*. The crude reaction mixture was purified by column chromatography on silica gel (80/20 hexanes:EtOAc) to afford *rac*-3-allyl-1-(benzyloxy)-4-phenylazetidin-2-one **9b** as a colorless oil (51 mg, 82%).

$^1\text{H NMR}$  (600 MHz,  $\text{CDCl}_3$ )  $\delta$  7.36 – 7.31 (m, 8H), 7.23 – 7.22 (m, 2H), 5.72 (ddt,  $J$  = 17.0, 10.4, 6.7 Hz, 1H), 5.05 – 5.01 (m, 2H), 4.97 (d,  $J$  = 11.3 Hz, 1H), 4.87 (d,  $J$  = 11.3 Hz, 1H), 4.16 (d,  $J$  = 2.1 Hz, 1H), 2.82 (ddd,  $J$  = 9.0, 5.1, 2.2 Hz, 1H), 2.54 (dddd,  $J$  = 14.5, 6.4, 5.1, 1.4 Hz, 1H), 2.36 – 2.30 (m, 1H).

$^{13}\text{C NMR}$  (150 MHz,  $\text{CDCl}_3$ )  $\delta$  166.5, 137.0, 135.3, 134.0, 129.3, 129.3, 129.0, 128.7, 128.7, 126.7, 117.8, 78.1, 68.8, 54.7, 32.6.

**HRMS:** Calculated  $[\text{M}+\text{H}]^+$  for  $\text{C}_{19}\text{H}_{20}\text{NO}_2^+$ : 294.1489, found: 294.1493.

**FTIR** ( $\text{cm}^{-1}$ ): 3065, 3032, 3007, 2930, 1767, 1641, 1497, 1455, 1368, 995, 971, 911, 742, 696.

### *rac*-3-allyl-1-(benzyloxy)-3-methyl-4-phenylazetidin-2-one (**9m**)

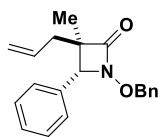

In a flame-dried round-bottom flask under Argon atmosphere, compound **2m** (69.2 mg, 0.2 mmol), AIBN (5.0 mg, 15 mol%) and allyltributyltin (132 mg, 2.0 equiv.) were dissolved in dry Toluene (0.5 mL, 0.4 M). Then the reaction was heated to 80 °C and left heating overnight. After completion, the reaction was allowed to cool down to room temperature and it was quenched with 1 mL of  $\text{H}_2\text{O}$ . The reaction mixture was extracted with EtOAc (5 mL x 3) and the combined organic layers were dried over  $\text{Na}_2\text{SO}_4$ . The reaction mixture was then concentrated *in vacuo*. The crude reaction mixture was purified by column chromatography on silica gel (80/20 hexanes:EtOAc) to afford *rac*-3-allyl-1-(benzyloxy)-3-methyl-4-phenylazetidin-2-one **9m** as a colorless oil (51 mg, 82%).

$^1\text{H NMR}$  (600 MHz,  $\text{CDCl}_3$ )  $\delta$  7.38 – 7.33 (m, 7H), 7.32 – 7.29 (m, 1H), 7.18 – 7.16 (m, 2H), 5.75 (ddt,  $J$  = 16.8, 10.2, 7.3 Hz, 1H), 5.15 – 5.11 (m, 2H), 5.06 (d,  $J$  = 11.2 Hz, 1H), 5.00 (d,  $J$  = 11.3 Hz, 1H), 4.45 (s, 1H), 2.37 (ddt,  $J$  = 13.9, 7.3, 1.1 Hz, 2H), 2.30 (ddt,  $J$  = 14.0, 7.4, 1.2 Hz, 1H), 0.75 (s, 3H).

$^{13}\text{C NMR}$  (150 MHz,  $\text{CDCl}_3$ )  $\delta$  168.9, 135.3, 135.3, 133.1, 129.3, 129.1, 128.7, 128.6, 128.2, 127.1, 119.3, 77.8, 70.0, 55.0, 40.5, 15.9.

**HRMS:** Calculated  $[\text{M}+\text{H}]^+$  for  $\text{C}_{20}\text{H}_{22}\text{NO}_2^+$ : 308.1645, found: 308.1650.

**FTIR** ( $\text{cm}^{-1}$ ): 3064, 3032, 3007, 2976, 2928, 1764, 1497, 1454, 1378, 1216, 1099, 983, 950, 914, 743, 696.

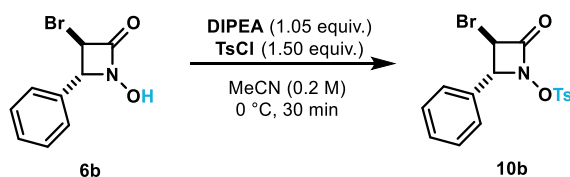

### *rac*-3-bromo-2-oxo-4-phenylazetidin-1-yl 4-methylbenzenesulfonate (**10b**)

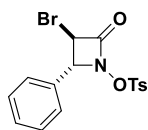

In a flame-dried round-bottom flask under Argon atmosphere, compound **6b** (711 mg, 3.0 mmol) and TsCl (841 mg, 1.5 equiv.) were dissolved in dry MeCN (15.0 mL, 0.2 M) and cooled down to 0 °C using an ice/water bath. Then Hunig's base (0.51 mL, 1.0 equiv.) was added slowly. After 30 min, the reaction was allowed to warm up to room temperature and it was then concentrated *in vacuo*. The crude reaction mixture was purified by column chromatography on silica gel (80/20 hexanes:EtOAc) to afford *rac*-3-bromo-2-oxo-4-phenylazetidin-1-yl 4-methylbenzenesulfonate **10b** as a pale-yellow solid (1.03 g, 88%).

$^1\text{H NMR}$  (600 MHz,  $\text{CDCl}_3$ )  $\delta$  7.90 (d,  $J = 8.3$  Hz, 2H), 7.43 – 7.40 (m, 5H), 7.30 – 7.28 (m, 2H), 5.14 (d,  $J = 1.8$  Hz, 1H), 4.34 (d,  $J = 1.8$  Hz, 1H), 2.49 (s, 3H).

$^{13}\text{C NMR}$  (150 MHz,  $\text{CDCl}_3$ )  $\delta$  160.0, 147.3, 132.9, 130.5, 130.3, 130.2, 129.5, 129.5, 126.9, 73.4, 45.5, 22.1.

**HRMS:** Calculated  $[\text{M}+\text{H}]^+$  for  $\text{C}_{16}\text{H}_{15}\text{BrNO}_4\text{S}^+$ : 395.9900, found: 395.9902.

**FTIR** ( $\text{cm}^{-1}$ ): 3032, 2997, 2925, 1804, 1594, 1497, 1457, 1385, 1193, 1177, 1089, 1028, 941, 810, 765, 708, 695.

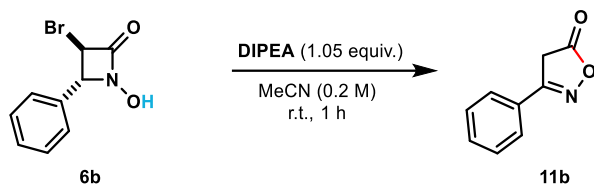

### 3-phenylisoxazol-5(4H)-one (11b)

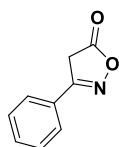

In a flame-dried round-bottom flask, compound **2b** (166 mg, 0.5 mmol) was dissolved in dry MeCN (2.5 mL, 0.2 M). Then Hunig's base (0.51 mL, 1.0 equiv.) was added slowly and it was left stirring at room temperature for 1 h. After completion, the reaction was concentrated *in vacuo*. The crude reaction mixture was purified by column chromatography on silica gel (60/40 hexanes:EtOAc) to afford 3-phenylisoxazolo-5(4H)-one **10b** as a white powder (53 mg, 66%). NMR data matches the ones reported in the literature.<sup>37</sup>

$^1\text{H NMR}$  (600 MHz,  $\text{CDCl}_3$ )  $\delta$  7.69 – 7.67 (m, 2H), 7.56 – 7.53 (m, 1H), 7.50 – 7.47 (m, 2H), 3.81 (s, 2H).

$^{13}\text{C NMR}$  (150 MHz,  $\text{CDCl}_3$ )  $\delta$  174.8, 163.2, 132.3, 129.4, 127.8, 126.7, 34.2.

<sup>37</sup> Chang, M-Y., Chen, H-y., Tsai, Y-L. *Org. Lett.* **2019**, *21*, 1832–1836.

## 17. Control experiments and procedures and characterization for the synthesis of compound 2a':

### Control Experiments:

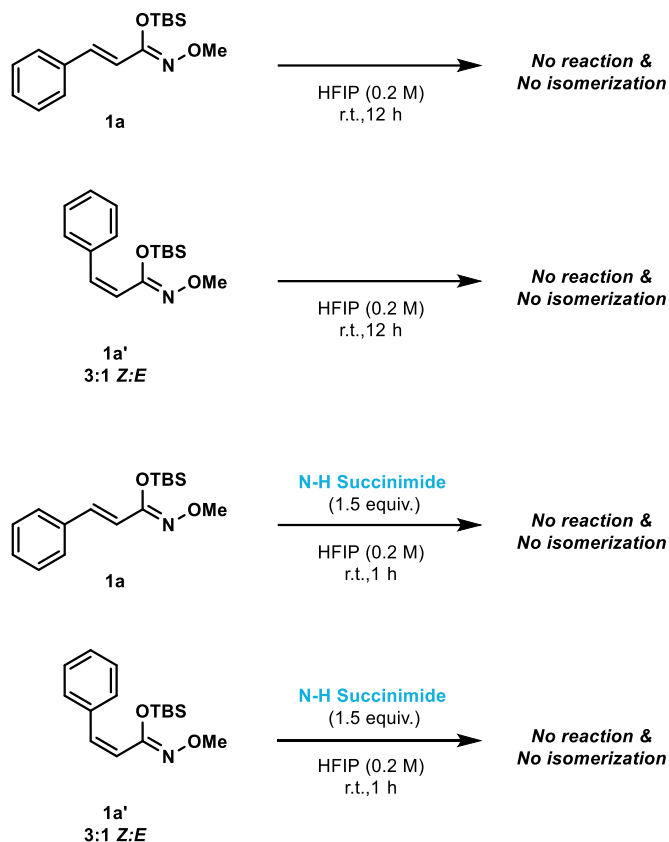

### Procedures and characterization for the synthesis of compound 2a':

#### (Z)-Methyl cinnamate (13a')

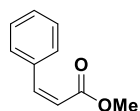

Following a modified literature procedure<sup>38</sup>, (*E*)-methyl cinnamate (1.5 g, 1.0 equiv.) was dissolved in DCM (77 mL, 0.12 M) under Argon atmosphere. BF<sub>3</sub> etherate (1.3 mL, 0.5 equiv.) was added. The reaction was shone with 2 white desk lamps for 3 days at room temperature. After 3 days, the reaction was quenched with 80 mL of H<sub>2</sub>O and extracted with DCM (80 mL x 3). The combined organic layers were dried over Na<sub>2</sub>SO<sub>4</sub> and concentrated *in vacuo*. The crude reaction mixture was purified by flash column chromatography (Hexane/EtOAc = 97/3) to afford (*Z*)-Methyl cinnamate **13a'** as a colorless oil (942 mg, 63%). NMR data matches the ones reported in the literature.<sup>39</sup>

<sup>1</sup>H NMR (600 MHz, CDCl<sub>3</sub>) δ 7.60 – 7.58 (m, 2H), 7.38 – 7.32 (m, 3H), 6.96 (d, *J* = 12.6 Hz, 1H), 5.96 (d, *J* = 12.6 Hz, 1H), 3.72 (s, 3H).

<sup>38</sup> Lewis, F.D., Oxman, J. D., Gibson, L.L., Hampsoch, H. L., Quillen, S.L. *J. Am. Chem. Soc.* **1986**, *108*(11), 3005–3015.

<sup>39</sup> Li, J., Tan, C., Gong, J., Yang, Z. *Org. Lett.* **2014**, *61*, 5370–5373.



### (Z)-N-methoxycinnamamide (12a')

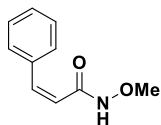

Following **Method B** from the general procedures for the synthesis of hydroxamate esters, in a flame-dried round-bottom flask under Argon atmosphere, MeONH<sub>2</sub>·HCl (958 mg, 11.47 mmol, 2.0 equiv.) was suspended in dry Toluene (29 mL, 0.2 M). The reaction mixture was then cooled down to -40 °C using an acetone cooling bath. Then a solution of AlMe<sub>3</sub> (5.7 mL, 2M in toluene, 2.0 equiv.) was added dropwise avoiding a spike in temperature greater than 20 °C. After the addition was done, compound **13a'** (930 mg, 5.74 mmol, 1.0 equiv.) was added, the reaction was allowed to warm to room temperature, and it was allowed to stir overnight. The reaction was then quenched with 3M HCl until gas evolution ceased. The reaction mixture was then partitioned with 30 mL H<sub>2</sub>O and extracted three times with 30 mL EtOAc. The combined organic layers were dried over Na<sub>2</sub>SO<sub>4</sub> and concentrated *in vacuo*. The crude reaction mixture was purified by column chromatography on silica gel (80:20 hexanes:EtOAc) to afford *N*-methoxycinnamamide **12a'** as a colorless oil (731 mg, 72%).

<sup>1</sup>H NMR (600 MHz, DMSO-d<sub>6</sub>) δ 11.27 (s, 1H), 7.59 – 7.58 (m, 2H), 7.37 – 7.32 (m, 2H), 7.31 – 7.30 (m, 1H), 6.76 (d, *J* = 12.7 Hz, 1H), 5.87 (d, *J* = 12.7 Hz, 1H), 3.61 (s, 3H).

<sup>13</sup>C NMR (150 MHz, DMSO-d<sub>6</sub>) δ 163.3, 137.5, 135.0, 129.3, 128.5, 128.1, 121.1, 62.9.

HRMS: Calculated [M+H]<sup>+</sup> for C<sub>10</sub>H<sub>12</sub>NO<sub>2</sub><sup>+</sup>: 178.0863, found: 178.0863.

FTIR (cm<sup>-1</sup>): 3173, 2974, 2935, 1650, 1622, 1495, 1225, 1065, 978, 930, 852, 769, 691.

### tertbutyl dimethylsilyl (1Z,2Z)-N-methoxycinnanimidate (1a')

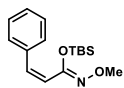

Following the general procedures for the synthesis of silyl imino ethers, in a flame-dried round bottom flask under Argon atmosphere, compound **12a'** (695 mg, 3.92 mmol, 1.0 equiv.) was dissolved in dry THF (20 mL, 0.2 M) at room temperature. The reaction mixture was then cooled down to -78 °C using an acetone-dry ice bath. A solution of KHMDS (5.1 mL, 1.2 equiv., 1.0 M in THF) was then added slowly. TBSCl (706 mg, 1.2 equiv.) was then added, and the reaction was allowed to warm to room temperature. The reaction was left stirring for 60 min until full conversion was overserved by TLC. The reaction mixture was then partitioned with 20 mL of H<sub>2</sub>O and extracted with 30 mL of EtOAc three times. The combined organic layers were dried over Na<sub>2</sub>SO<sub>4</sub> and concentrated *in vacuo*. The reaction crude was then purified by column chromatography on silica gel (93:7 hexanes:EtOAc) to afford *tertbutyl* dimethylsilyl (*Z*)-*N*-methoxycinnanimidate **1a'** and compound **1a** as a colorless oil (646 mg, 60%) in a 3:1 mixture of inseparable diastereomers.

#### Data for 1a':

<sup>1</sup>H NMR (600 MHz, CDCl<sub>3</sub>) δ 7.43 – 7.42 (m, 2H), 7.29 – 7.27 (m, 2H), 7.24 – 7.22 (m, 1H), 6.66 (d, *J* = 12.5 Hz, 1H), 5.94 (d, *J* = 12.5 Hz, 1H), 3.80 (s, 3H), 0.70 (s, 9H), -0.01 (s, 6H).

<sup>13</sup>C NMR (150 MHz, CDCl<sub>3</sub>) δ 151.6, 136.2, 135.6, 129.7, 128.0, 127.9, 120.7, 61.2, 25.5, 18.6, -4.3.

HRMS: Calculated [M+H]<sup>+</sup> for C<sub>16</sub>H<sub>26</sub>NO<sub>2</sub>Si<sup>+</sup>: 292.1727, found: 292.1732.

FTIR (cm<sup>-1</sup>): 3060, 3028, 2952, 2931, 2898, 1579, 1471, 1463, 1297, 1252, 993, 823, 783, 693.

### rac-3-bromo-1-methoxy-4-phenylazetidin-2-one (2a')

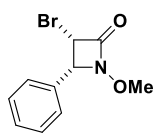

Following the general procedures for the synthesis of  $\beta$ -lactams, in an 8-mL scintillation vial open to air, compound **1a'** (145.7 mg, 0.5 mmol) was dissolved in HFIP (2.5 mL, 0.2 M). NBS (134.9 mg, 1.5 equiv.) was then added, and the reaction mixture was stirred for 60 min. After completion, the reaction was concentrated *in vacuo* and purified by column chromatography on silica gel (90:10 Hexanes:EtOAc) to afford rac-3-bromo-1-methoxy-4-phenylazetidin-2-one **2a'** as a white crystalline solid (22 mg, 18%).

**$^1\text{H}$  NMR (600 MHz,  $\text{CDCl}_3$ )**  $\delta$  7.46 – 7.41 (m, 3H), 7.36 – 7.35 (m, 2H), 5.26 (d,  $J = 5.2$  Hz, 1H), 4.98 (d,  $J = 5.2$  Hz, 1H), 3.85 (s, 3H).

**$^{13}\text{C}$  NMR (150 MHz,  $\text{CDCl}_3$ )**  $\delta$  161.4, 133.3, 129.6, 128.6, 128.6, 128.2, 64.8, 64.2, 47.0.

**HRMS:** Calculated  $[\text{M}+\text{H}]^+$  for  $\text{C}_{10}\text{H}_{11}\text{BrNO}_2^+$ : 255.9968, found: 255.9969.

**Melting Point:** 109.2 – 113.4  $^\circ\text{C}$

**FTIR ( $\text{cm}^{-1}$ ):** 3064, 3036, 3007, 2918, 1779, 1541, 1456, 1367, 1035, 968, 843, 750, 695.

## 18. X-Ray Data:

Data for **2j**, **2k** and **2a'** were collected using a Bruker APEX II diffractometer with Mo-K $\alpha$  radiation ( $\lambda = 0.71073 \text{ \AA}$ ). The cell parameters were obtained from the least squares refinement of the spots (from 36 collected frames) using APEX 4 (Bruker-AXS, 2022). Data collection and absorption correction were performed using APEX 4 (Bruker-AXS, 2022) and refined by least squares methods using SHELXL2018 (Sheldrick, 2015). Initial atomic positions for XXX were located using intrinsic phasing. Calculated hydrogen atom positions were input and refined in a riding manner along with attached carbons. The crystallographic details for **2j**, **2k** and **2a'** are summarized below.

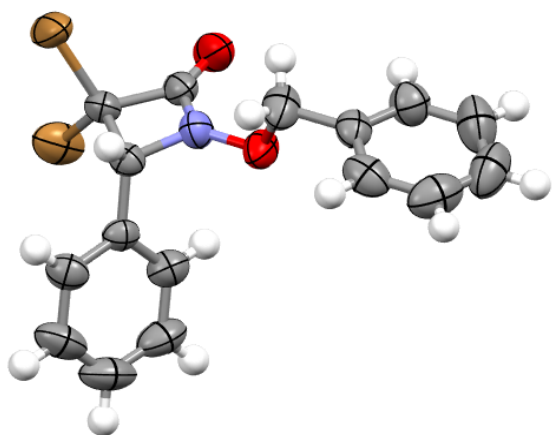

**Table 3.** Crystal data and structure refinement for C<sub>16</sub>H<sub>13</sub>Br<sub>2</sub>N O<sub>2</sub> (**2j**).

|                        |                                                                  |                  |
|------------------------|------------------------------------------------------------------|------------------|
| Identification code    | <b>2j, CCDC: 2301303</b>                                         |                  |
| Empirical formula      | C <sub>16</sub> H <sub>13</sub> Br <sub>2</sub> N O <sub>2</sub> |                  |
| Formula weight         | 411.09                                                           |                  |
| Temperature            | 296(2) K                                                         |                  |
| Wavelength             | 0.71073 Å                                                        |                  |
| Crystal system         | Monoclinic                                                       |                  |
| Space group            | P2 <sub>1</sub> /n                                               |                  |
| Unit cell dimensions   | a = 9.9175(14) Å                                                 | a = 90°.         |
|                        | b = 17.323(3) Å                                                  | b = 115.609(2)°. |
|                        | c = 10.7669(15) Å                                                | g = 90°.         |
| Volume                 | 1668.1(4) Å <sup>3</sup>                                         |                  |
| Z                      | 4                                                                |                  |
| Density (calculated)   | 1.637 Mg/m <sup>3</sup>                                          |                  |
| Absorption coefficient | 4.862 mm <sup>-1</sup>                                           |                  |
| F(000)                 | 808                                                              |                  |

|                                   |                                             |
|-----------------------------------|---------------------------------------------|
| Crystal size                      | 0.300 x 0.250 x 0.050 mm <sup>3</sup>       |
| Theta range for data collection   | 2.336 to 29.146°.                           |
| Index ranges                      | -13<=h<=13, -23<=k<=23, -14<=l<=14          |
| Reflections collected             | 18321                                       |
| Independent reflections           | 4466 [R(int) = 0.0367]                      |
| Completeness to theta = 25.000°   | 100.0 %                                     |
| Absorption correction             | Semi-empirical from equivalents             |
| Max. and min. transmission        | 0.745 and 0.441                             |
| Refinement method                 | Full-matrix least-squares on F <sup>2</sup> |
| Data / restraints / parameters    | 4466 / 0 / 190                              |
| Goodness-of-fit on F <sup>2</sup> | 1.017                                       |
| Final R indices [I>2sigma(I)]     | R1 = 0.0442, wR2 = 0.1051                   |
| R indices (all data)              | R1 = 0.0852, wR2 = 0.1234                   |
| Largest diff. peak and hole       | 0.798 and -0.763 e.Å <sup>-3</sup>          |

**Table 4.** Atomic coordinates (x 10<sup>4</sup>) and equivalent isotropic displacement parameters (Å<sup>2</sup>x 10<sup>3</sup>) for C16 H13 Br2 N O2 (**2j**). U(eq) is defined as one third of the trace of the orthogonalized U<sup>ij</sup> tensor.

|       | x       | y       | z       | U(eq) |
|-------|---------|---------|---------|-------|
| Br(1) | 7714(1) | 990(1)  | 3078(1) | 85(1) |
| Br(2) | 7015(1) | 492(1)  | 5556(1) | 86(1) |
| O(1)  | 9537(3) | 2027(2) | 6164(3) | 78(1) |
| O(2)  | 7070(3) | 3253(1) | 5095(3) | 64(1) |
| N(1)  | 7126(3) | 2486(2) | 4797(3) | 57(1) |
| C(1)  | 7183(3) | 1338(2) | 4502(3) | 50(1) |
| C(2)  | 8248(4) | 1980(2) | 5355(4) | 54(1) |
| C(3)  | 5904(4) | 1953(2) | 4015(3) | 48(1) |
| C(4)  | 7352(6) | 3744(2) | 4137(4) | 75(1) |
| C(5)  | 7397(4) | 4546(2) | 4634(4) | 55(1) |
| C(6)  | 8668(5) | 4823(3) | 5697(4) | 71(1) |
| C(7)  | 8718(7) | 5550(3) | 6191(6) | 98(2) |
| C(8)  | 7515(8) | 6018(3) | 5671(6) | 97(2) |
| C(9)  | 6236(7) | 5766(3) | 4609(6) | 92(2) |
| C(10) | 6168(5) | 5027(3) | 4093(4) | 74(1) |
| C(11) | 4698(3) | 1899(2) | 4496(3) | 46(1) |

|       |         |         |         |       |
|-------|---------|---------|---------|-------|
| C(12) | 4951(4) | 2121(2) | 5814(4) | 59(1) |
| C(13) | 3829(6) | 2066(3) | 6235(5) | 76(1) |
| C(14) | 2448(5) | 1784(3) | 5350(6) | 85(1) |
| C(15) | 2197(5) | 1559(3) | 4056(5) | 80(1) |
| C(16) | 3308(4) | 1620(2) | 3622(4) | 61(1) |

---

**Table 5.** Bond lengths [Å] and angles [°] for C16 H13 Br2 N O2 (**2j**).

---

|             |          |
|-------------|----------|
| Br(1)-C(1)  | 1.922(3) |
| Br(2)-C(1)  | 1.904(3) |
| O(1)-C(2)   | 1.199(4) |
| O(2)-N(1)   | 1.375(4) |
| O(2)-C(4)   | 1.454(5) |
| N(1)-C(2)   | 1.337(5) |
| N(1)-C(3)   | 1.466(4) |
| C(1)-C(2)   | 1.536(5) |
| C(1)-C(3)   | 1.562(5) |
| C(3)-C(11)  | 1.498(4) |
| C(3)-H(3)   | 0.9800   |
| C(4)-C(5)   | 1.482(5) |
| C(4)-H(4A)  | 0.9700   |
| C(4)-H(4B)  | 0.9700   |
| C(5)-C(6)   | 1.372(5) |
| C(5)-C(10)  | 1.380(6) |
| C(6)-C(7)   | 1.361(7) |
| C(6)-H(6)   | 0.9300   |
| C(7)-C(8)   | 1.348(8) |
| C(7)-H(7)   | 0.9300   |
| C(8)-C(9)   | 1.361(8) |
| C(8)-H(8)   | 0.9300   |
| C(9)-C(10)  | 1.386(7) |
| C(9)-H(9)   | 0.9300   |
| C(10)-H(10) | 0.9300   |
| C(11)-C(16) | 1.377(5) |
| C(11)-C(12) | 1.385(5) |

|                  |            |
|------------------|------------|
| C(12)-C(13)      | 1.374(6)   |
| C(12)-H(12)      | 0.9300     |
| C(13)-C(14)      | 1.376(7)   |
| C(13)-H(13)      | 0.9300     |
| C(14)-C(15)      | 1.363(7)   |
| C(14)-H(14)      | 0.9300     |
| C(15)-C(16)      | 1.374(6)   |
| C(15)-H(15)      | 0.9300     |
| C(16)-H(16)      | 0.9300     |
| N(1)-O(2)-C(4)   | 111.1(3)   |
| C(2)-N(1)-O(2)   | 129.6(3)   |
| C(2)-N(1)-C(3)   | 99.6(3)    |
| O(2)-N(1)-C(3)   | 129.6(3)   |
| C(2)-C(1)-C(3)   | 87.5(2)    |
| C(2)-C(1)-Br(2)  | 114.6(2)   |
| C(3)-C(1)-Br(2)  | 117.2(2)   |
| C(2)-C(1)-Br(1)  | 110.5(2)   |
| C(3)-C(1)-Br(1)  | 114.1(2)   |
| Br(2)-C(1)-Br(1) | 111.00(17) |
| O(1)-C(2)-N(1)   | 134.6(4)   |
| O(1)-C(2)-C(1)   | 136.5(4)   |
| N(1)-C(2)-C(1)   | 89.0(3)    |
| N(1)-C(3)-C(11)  | 115.2(3)   |
| N(1)-C(3)-C(1)   | 83.5(2)    |
| C(11)-C(3)-C(1)  | 119.7(3)   |
| N(1)-C(3)-H(3)   | 111.8      |
| C(11)-C(3)-H(3)  | 111.8      |
| C(1)-C(3)-H(3)   | 111.8      |
| O(2)-C(4)-C(5)   | 106.0(3)   |
| O(2)-C(4)-H(4A)  | 110.5      |
| C(5)-C(4)-H(4A)  | 110.5      |
| O(2)-C(4)-H(4B)  | 110.5      |
| C(5)-C(4)-H(4B)  | 110.5      |
| H(4A)-C(4)-H(4B) | 108.7      |
| C(6)-C(5)-C(10)  | 117.8(4)   |
| C(6)-C(5)-C(4)   | 120.1(4)   |

|                   |          |
|-------------------|----------|
| C(10)-C(5)-C(4)   | 122.1(4) |
| C(7)-C(6)-C(5)    | 121.0(5) |
| C(7)-C(6)-H(6)    | 119.5    |
| C(5)-C(6)-H(6)    | 119.5    |
| C(8)-C(7)-C(6)    | 121.2(5) |
| C(8)-C(7)-H(7)    | 119.4    |
| C(6)-C(7)-H(7)    | 119.4    |
| C(7)-C(8)-C(9)    | 119.5(5) |
| C(7)-C(8)-H(8)    | 120.2    |
| C(9)-C(8)-H(8)    | 120.2    |
| C(8)-C(9)-C(10)   | 119.9(5) |
| C(8)-C(9)-H(9)    | 120.0    |
| C(10)-C(9)-H(9)   | 120.0    |
| C(5)-C(10)-C(9)   | 120.6(4) |
| C(5)-C(10)-H(10)  | 119.7    |
| C(9)-C(10)-H(10)  | 119.7    |
| C(16)-C(11)-C(12) | 118.8(3) |
| C(16)-C(11)-C(3)  | 119.9(3) |
| C(12)-C(11)-C(3)  | 121.3(3) |
| C(13)-C(12)-C(11) | 120.3(4) |
| C(13)-C(12)-H(12) | 119.8    |
| C(11)-C(12)-H(12) | 119.8    |
| C(12)-C(13)-C(14) | 120.1(4) |
| C(12)-C(13)-H(13) | 119.9    |
| C(14)-C(13)-H(13) | 119.9    |
| C(15)-C(14)-C(13) | 119.8(4) |
| C(15)-C(14)-H(14) | 120.1    |
| C(13)-C(14)-H(14) | 120.1    |
| C(14)-C(15)-C(16) | 120.4(4) |
| C(14)-C(15)-H(15) | 119.8    |
| C(16)-C(15)-H(15) | 119.8    |
| C(15)-C(16)-C(11) | 120.6(4) |
| C(15)-C(16)-H(16) | 119.7    |
| C(11)-C(16)-H(16) | 119.7    |

---

Symmetry transformations used to generate equivalent atoms:

**Table 6.** Anisotropic displacement parameters ( $\text{\AA}^2 \times 10^3$ ) for C16 H13 Br2 N O2 (**2j**). The anisotropic displacement factor exponent takes the form:  $-2p^2[ h^2 a^{*2}U^{11} + \dots + 2 h k a^* b^* U^{12} ]$

|       | $U^{11}$ | $U^{22}$ | $U^{33}$ | $U^{23}$ | $U^{13}$ | $U^{12}$ |
|-------|----------|----------|----------|----------|----------|----------|
| Br(1) | 67(1)    | 116(1)   | 82(1)    | -45(1)   | 43(1)    | -14(1)   |
| Br(2) | 79(1)    | 63(1)    | 123(1)   | 33(1)    | 52(1)    | 19(1)    |
| O(1)  | 49(2)    | 103(2)   | 73(2)    | -32(2)   | 18(1)    | -6(1)    |
| O(2)  | 90(2)    | 44(1)    | 76(2)    | -4(1)    | 53(2)    | -10(1)   |
| N(1)  | 57(2)    | 45(2)    | 71(2)    | -4(1)    | 29(2)    | -6(1)    |
| C(1)  | 42(2)    | 54(2)    | 57(2)    | -3(2)    | 24(2)    | -2(1)    |
| C(2)  | 49(2)    | 64(2)    | 52(2)    | -12(2)   | 25(2)    | -6(2)    |
| C(3)  | 47(2)    | 51(2)    | 44(2)    | 4(1)     | 20(1)    | -2(1)    |
| C(4)  | 113(3)   | 58(2)    | 70(2)    | -4(2)    | 56(3)    | -17(2)   |
| C(5)  | 71(2)    | 49(2)    | 51(2)    | 2(2)     | 33(2)    | -10(2)   |
| C(6)  | 71(3)    | 66(3)    | 70(2)    | 2(2)     | 25(2)    | -2(2)    |
| C(7)  | 120(4)   | 79(4)    | 82(3)    | -15(3)   | 31(3)    | -32(3)   |
| C(8)  | 160(6)   | 57(3)    | 92(4)    | -6(3)    | 70(4)    | -5(3)    |
| C(9)  | 116(4)   | 76(3)    | 105(4)   | 31(3)    | 69(4)    | 32(3)    |
| C(10) | 67(2)    | 88(3)    | 62(2)    | 17(2)    | 24(2)    | -8(2)    |
| C(11) | 45(2)    | 43(2)    | 51(2)    | 8(1)     | 23(1)    | 9(1)     |
| C(12) | 63(2)    | 61(2)    | 59(2)    | 5(2)     | 31(2)    | 8(2)     |
| C(13) | 99(3)    | 76(3)    | 79(3)    | 13(2)    | 62(3)    | 22(2)    |
| C(14) | 76(3)    | 89(3)    | 119(4)   | 34(3)    | 69(3)    | 24(2)    |
| C(15) | 49(2)    | 93(3)    | 100(3)   | 22(3)    | 35(2)    | 5(2)     |
| C(16) | 50(2)    | 69(2)    | 61(2)    | 7(2)     | 21(2)    | 4(2)     |

**Table 7.** Hydrogen coordinates ( $\times 10^4$ ) and isotropic displacement parameters ( $\text{\AA}^2 \times 10^{-3}$ ) for C16 H13 Br2 N O2 (**2j**).

|  | x | y | z | U(eq) |
|--|---|---|---|-------|
|--|---|---|---|-------|



|       |      |      |      |     |
|-------|------|------|------|-----|
| H(3)  | 5495 | 2046 | 3021 | 57  |
| H(4A) | 6562 | 3687 | 3213 | 90  |
| H(4B) | 8297 | 3610 | 4127 | 90  |
| H(6)  | 9508 | 4508 | 6085 | 86  |
| H(7)  | 9599 | 5728 | 6901 | 117 |
| H(8)  | 7559 | 6509 | 6035 | 117 |
| H(9)  | 5408 | 6090 | 4230 | 110 |
| H(10) | 5289 | 4854 | 3376 | 88  |
| H(12) | 5885 | 2307 | 6418 | 71  |
| H(13) | 4003 | 2220 | 7119 | 92  |
| H(14) | 1688 | 1748 | 5635 | 102 |
| H(15) | 1268 | 1362 | 3462 | 96  |
| H(16) | 3120 | 1473 | 2732 | 73  |

---

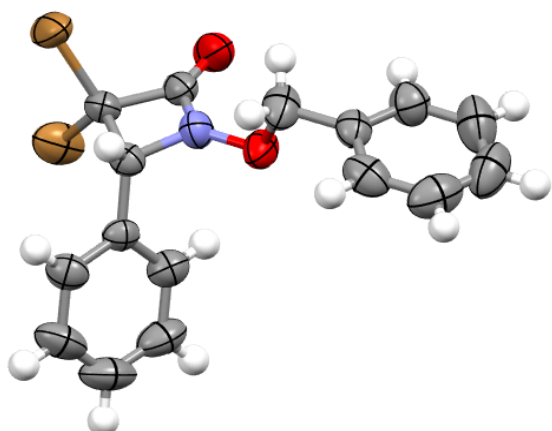

**Table 8.** Crystal data and structure refinement for C<sub>16</sub>H<sub>13</sub>BrClN<sub>2</sub>O<sub>2</sub> (**2k**).

|                                 |                                                                   |                  |
|---------------------------------|-------------------------------------------------------------------|------------------|
| Identification code             | <b>2k, CCDC: 2301304</b>                                          |                  |
| Empirical formula               | C <sub>16</sub> H <sub>13</sub> BrClN <sub>2</sub> O <sub>2</sub> |                  |
| Formula weight                  | 366.63                                                            |                  |
| Temperature                     | 296(2) K                                                          |                  |
| Wavelength                      | 0.71073 Å                                                         |                  |
| Crystal system                  | Monoclinic                                                        |                  |
| Space group                     | P2 <sub>1</sub> /n                                                |                  |
| Unit cell dimensions            | a = 9.915(3) Å                                                    | a = 90°.         |
|                                 | b = 17.251(6) Å                                                   | b = 115.375(5)°. |
|                                 | c = 10.682(3) Å                                                   | g = 90°.         |
| Volume                          | 1650.8(9) Å <sup>3</sup>                                          |                  |
| Z                               | 4                                                                 |                  |
| Density (calculated)            | 1.475 Mg/m <sup>3</sup>                                           |                  |
| Absorption coefficient          | 2.654 mm <sup>-1</sup>                                            |                  |
| F(000)                          | 736                                                               |                  |
| Crystal size                    | 0.200 x 0.150 x 0.100 mm <sup>3</sup>                             |                  |
| Theta range for data collection | 2.347 to 31.775°.                                                 |                  |
| Index ranges                    | -14 ≤ h ≤ 14, -25 ≤ k ≤ 25, -15 ≤ l ≤ 15                          |                  |
| Reflections collected           | 20864                                                             |                  |
| Independent reflections         | 5570 [R(int) = 0.0363]                                            |                  |
| Completeness to theta = 25.000° | 100.0 %                                                           |                  |
| Absorption correction           | Semi-empirical from equivalents                                   |                  |
| Max. and min. transmission      | 0.746 and 0.602                                                   |                  |

|                                   |                                             |
|-----------------------------------|---------------------------------------------|
| Refinement method                 | Full-matrix least-squares on F <sup>2</sup> |
| Data / restraints / parameters    | 5570 / 0 / 190                              |
| Goodness-of-fit on F <sup>2</sup> | 1.017                                       |
| Final R indices [I>2sigma(I)]     | R1 = 0.0476, wR2 = 0.1286                   |
| R indices (all data)              | R1 = 0.0992, wR2 = 0.1519                   |
| Extinction coefficient            | n/a                                         |
| Largest diff. peak and hole       | 0.745 and -0.663 e.Å <sup>-3</sup>          |

**Table 9.** Atomic coordinates (x 10<sup>4</sup>) and equivalent isotropic displacement parameters (Å<sup>2</sup>x 10<sup>3</sup>) for C16 H13 Br Cl N O2 (**2k**). U(eq) is defined as one third of the trace of the orthogonalized U<sup>ij</sup> tensor.

|       | x       | y       | z       | U(eq)  |
|-------|---------|---------|---------|--------|
| Br(1) | 2269(1) | 904(1)  | 6744(1) | 91(1)  |
| Cl(1) | 3019(1) | 542(1)  | 4334(1) | 86(1)  |
| O(1)  | 485(2)  | 2002(2) | 3689(2) | 86(1)  |
| O(2)  | 2927(2) | 3235(1) | 4845(2) | 66(1)  |
| N(1)  | 2872(2) | 2456(1) | 5105(2) | 61(1)  |
| C(1)  | 2822(3) | 1299(2) | 5337(3) | 54(1)  |
| C(2)  | 1769(3) | 1951(2) | 4513(3) | 58(1)  |
| C(3)  | 4103(3) | 1918(1) | 5881(3) | 51(1)  |
| C(4)  | 5309(3) | 1878(1) | 5398(2) | 50(1)  |
| C(5)  | 5086(3) | 2131(2) | 4093(3) | 63(1)  |
| C(6)  | 6217(5) | 2083(2) | 3673(4) | 82(1)  |
| C(7)  | 7568(4) | 1781(2) | 4533(5) | 91(1)  |
| C(8)  | 7807(4) | 1524(2) | 5829(4) | 89(1)  |
| C(9)  | 6689(3) | 1574(2) | 6278(3) | 66(1)  |
| C(10) | 2587(4) | 3705(2) | 5809(3) | 74(1)  |
| C(11) | 2584(3) | 4522(2) | 5362(3) | 58(1)  |
| C(12) | 3829(4) | 4992(2) | 5946(3) | 78(1)  |
| C(13) | 3793(6) | 5744(2) | 5465(5) | 98(1)  |
| C(14) | 2528(6) | 6019(2) | 4411(5) | 102(1) |
| C(15) | 1307(6) | 5565(2) | 3838(4) | 101(1) |
| C(16) | 1326(4) | 4821(2) | 4299(3) | 76(1)  |

**Table 10.** Bond lengths [Å] and angles [°] for C16 H13 Br Cl N O2 (**2k**).

---

|              |          |
|--------------|----------|
| Br(1)-C(1)   | 1.930(3) |
| Cl(1)-C(1)   | 1.752(3) |
| O(1)-C(2)    | 1.202(3) |
| O(2)-N(1)    | 1.377(3) |
| O(2)-C(10)   | 1.459(3) |
| N(1)-C(2)    | 1.327(3) |
| N(1)-C(3)    | 1.474(3) |
| C(1)-C(2)    | 1.531(4) |
| C(1)-C(3)    | 1.569(3) |
| C(3)-C(4)    | 1.493(3) |
| C(3)-H(3)    | 0.9800   |
| C(4)-C(5)    | 1.386(4) |
| C(4)-C(9)    | 1.389(4) |
| C(5)-C(6)    | 1.377(4) |
| C(5)-H(5)    | 0.9300   |
| C(6)-C(7)    | 1.362(6) |
| C(6)-H(6)    | 0.9300   |
| C(7)-C(8)    | 1.374(5) |
| C(7)-H(7)    | 0.9300   |
| C(8)-C(9)    | 1.386(5) |
| C(8)-H(8)    | 0.9300   |
| C(9)-H(9)    | 0.9300   |
| C(10)-C(11)  | 1.488(4) |
| C(10)-H(10A) | 0.9700   |
| C(10)-H(10B) | 0.9700   |
| C(11)-C(16)  | 1.378(4) |
| C(11)-C(12)  | 1.382(4) |
| C(12)-C(13)  | 1.391(6) |
| C(12)-H(12)  | 0.9300   |
| C(13)-C(14)  | 1.362(6) |
| C(13)-H(13)  | 0.9300   |
| C(14)-C(15)  | 1.349(6) |
| C(14)-H(14)  | 0.9300   |
| C(15)-C(16)  | 1.371(5) |

|                  |            |
|------------------|------------|
| C(15)-H(15)      | 0.9300     |
| C(16)-H(16)      | 0.9300     |
| N(1)-O(2)-C(10)  | 111.0(2)   |
| C(2)-N(1)-O(2)   | 129.8(2)   |
| C(2)-N(1)-C(3)   | 99.7(2)    |
| O(2)-N(1)-C(3)   | 129.3(2)   |
| C(2)-C(1)-C(3)   | 87.47(19)  |
| C(2)-C(1)-Cl(1)  | 115.06(19) |
| C(3)-C(1)-Cl(1)  | 116.70(17) |
| C(2)-C(1)-Br(1)  | 110.87(17) |
| C(3)-C(1)-Br(1)  | 114.01(17) |
| Cl(1)-C(1)-Br(1) | 110.87(14) |
| O(1)-C(2)-N(1)   | 134.4(3)   |
| O(1)-C(2)-C(1)   | 136.2(3)   |
| N(1)-C(2)-C(1)   | 89.4(2)    |
| N(1)-C(3)-C(4)   | 115.3(2)   |
| N(1)-C(3)-C(1)   | 82.95(18)  |
| C(4)-C(3)-C(1)   | 118.8(2)   |
| N(1)-C(3)-H(3)   | 112.2      |
| C(4)-C(3)-H(3)   | 112.2      |
| C(1)-C(3)-H(3)   | 112.2      |
| C(5)-C(4)-C(9)   | 119.1(3)   |
| C(5)-C(4)-C(3)   | 121.8(2)   |
| C(9)-C(4)-C(3)   | 119.1(2)   |
| C(6)-C(5)-C(4)   | 120.5(3)   |
| C(6)-C(5)-H(5)   | 119.7      |
| C(4)-C(5)-H(5)   | 119.7      |
| C(7)-C(6)-C(5)   | 120.4(3)   |
| C(7)-C(6)-H(6)   | 119.8      |
| C(5)-C(6)-H(6)   | 119.8      |
| C(6)-C(7)-C(8)   | 119.9(3)   |
| C(6)-C(7)-H(7)   | 120.1      |
| C(8)-C(7)-H(7)   | 120.1      |
| C(7)-C(8)-C(9)   | 120.7(3)   |
| C(7)-C(8)-H(8)   | 119.6      |
| C(9)-C(8)-H(8)   | 119.6      |

|                     |          |
|---------------------|----------|
| C(8)-C(9)-C(4)      | 119.4(3) |
| C(8)-C(9)-H(9)      | 120.3    |
| C(4)-C(9)-H(9)      | 120.3    |
| O(2)-C(10)-C(11)    | 105.6(2) |
| O(2)-C(10)-H(10A)   | 110.6    |
| C(11)-C(10)-H(10A)  | 110.6    |
| O(2)-C(10)-H(10B)   | 110.6    |
| C(11)-C(10)-H(10B)  | 110.6    |
| H(10A)-C(10)-H(10B) | 108.8    |
| C(16)-C(11)-C(12)   | 118.0(3) |
| C(16)-C(11)-C(10)   | 119.8(3) |
| C(12)-C(11)-C(10)   | 122.2(3) |
| C(11)-C(12)-C(13)   | 120.3(3) |
| C(11)-C(12)-H(12)   | 119.9    |
| C(13)-C(12)-H(12)   | 119.9    |
| C(14)-C(13)-C(12)   | 119.9(4) |
| C(14)-C(13)-H(13)   | 120.0    |
| C(12)-C(13)-H(13)   | 120.0    |
| C(15)-C(14)-C(13)   | 120.2(4) |
| C(15)-C(14)-H(14)   | 119.9    |
| C(13)-C(14)-H(14)   | 119.9    |
| C(14)-C(15)-C(16)   | 120.6(4) |
| C(14)-C(15)-H(15)   | 119.7    |
| C(16)-C(15)-H(15)   | 119.7    |
| C(15)-C(16)-C(11)   | 121.0(4) |
| C(15)-C(16)-H(16)   | 119.5    |
| C(11)-C(16)-H(16)   | 119.5    |

---

Symmetry transformations used to generate equivalent atoms:

**Table 11.** Anisotropic displacement parameters ( $\text{\AA}^2 \times 10^3$ ) for C16 H13 Br Cl N O2 (**2k**). The anisotropic displacement factor exponent takes the form:  $-2p^2[ h^2 a^{*2}U^{11} + \dots + 2 h k a^* b^* U^{12} ]$

|       | U <sup>11</sup> | U <sup>22</sup> | U <sup>33</sup> | U <sup>23</sup> | U <sup>13</sup> | U <sup>12</sup> |
|-------|-----------------|-----------------|-----------------|-----------------|-----------------|-----------------|
| Br(1) | 71(1)           | 120(1)          | 90(1)           | 46(1)           | 42(1)           | 9(1)            |
| Cl(1) | 81(1)           | 67(1)           | 119(1)          | -34(1)          | 51(1)           | -22(1)          |
| O(1)  | 50(1)           | 115(2)          | 79(1)           | 32(1)           | 13(1)           | 2(1)            |
| O(2)  | 90(1)           | 50(1)           | 77(1)           | 3(1)            | 52(1)           | 10(1)           |
| N(1)  | 56(1)           | 51(1)           | 74(1)           | 5(1)            | 26(1)           | 7(1)            |
| C(1)  | 50(1)           | 58(1)           | 57(1)           | 5(1)            | 26(1)           | -2(1)           |
| C(2)  | 50(1)           | 72(2)           | 56(1)           | 15(1)           | 25(1)           | 4(1)            |
| C(3)  | 50(1)           | 54(1)           | 48(1)           | -2(1)           | 20(1)           | 1(1)            |
| C(4)  | 49(1)           | 49(1)           | 51(1)           | -9(1)           | 22(1)           | -9(1)           |
| C(5)  | 69(2)           | 65(2)           | 58(2)           | -5(1)           | 31(1)           | -9(1)           |
| C(6)  | 101(3)          | 87(2)           | 80(2)           | -19(2)          | 61(2)           | -27(2)          |
| C(7)  | 82(2)           | 106(3)          | 111(3)          | -39(2)          | 67(2)           | -28(2)          |
| C(8)  | 53(2)           | 106(3)          | 106(3)          | -22(2)          | 32(2)           | 0(2)            |
| C(9)  | 52(2)           | 78(2)           | 66(2)           | -4(1)           | 22(1)           | 0(1)            |
| C(10) | 105(2)          | 66(2)           | 68(2)           | 9(1)            | 51(2)           | 22(2)           |
| C(11) | 71(2)           | 56(1)           | 50(1)           | -3(1)           | 31(1)           | 10(1)           |
| C(12) | 74(2)           | 90(2)           | 66(2)           | -17(2)          | 26(2)           | 6(2)            |
| C(13) | 119(3)          | 83(2)           | 110(3)          | -36(2)          | 65(3)           | -31(2)          |
| C(14) | 162(5)          | 62(2)           | 95(3)           | -1(2)           | 68(3)           | 2(2)            |
| C(15) | 126(3)          | 88(3)           | 80(2)           | 21(2)           | 35(2)           | 41(2)           |
| C(16) | 77(2)           | 73(2)           | 70(2)           | 2(2)            | 24(2)           | 9(2)            |

**Table 12.** Hydrogen coordinates ( $\times 10^4$ ) and isotropic displacement parameters ( $\text{\AA}^2 \times 10^{-3}$ ) for C16 H13 Br Cl N O2 (**2k**).

|        | x    | y    | z    | U(eq) |
|--------|------|------|------|-------|
| H(3)   | 4500 | 1995 | 6885 | 61    |
| H(5)   | 4166 | 2335 | 3496 | 75    |
| H(6)   | 6058 | 2258 | 2797 | 98    |
| H(7)   | 8328 | 1749 | 4243 | 109   |
| H(8)   | 8728 | 1315 | 6411 | 107   |
| H(9)   | 6862 | 1405 | 7161 | 80    |
| H(10A) | 3338 | 3631 | 6751 | 89    |
| H(10B) | 1619 | 3566 | 5765 | 89    |
| H(12)  | 4694 | 4804 | 6664 | 94    |
| H(13)  | 4632 | 6059 | 5862 | 118   |
| H(14)  | 2506 | 6521 | 4086 | 122   |
| H(15)  | 444  | 5757 | 3124 | 122   |
| H(16)  | 477  | 4514 | 3888 | 91    |



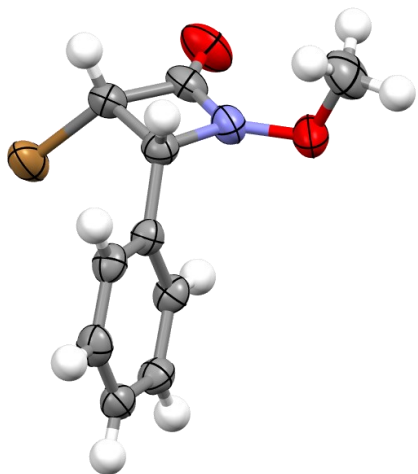

**Table 13.** Crystal data and structure refinement for C<sub>10</sub>H<sub>10</sub>BrN<sub>2</sub>O<sub>2</sub> (**2a'**).

|                                 |                                                                 |          |
|---------------------------------|-----------------------------------------------------------------|----------|
| Identification code             | <b>2a', CCDC: 2302628</b>                                       |          |
| Empirical formula               | C <sub>10</sub> H <sub>10</sub> BrN <sub>2</sub> O <sub>2</sub> |          |
| Formula weight                  | 256.10                                                          |          |
| Temperature                     | 296(2) K                                                        |          |
| Wavelength                      | 0.71073 Å                                                       |          |
| Crystal system                  | Orthorhombic                                                    |          |
| Space group                     | P2 <sub>1</sub> 2 <sub>1</sub> 2 <sub>1</sub>                   |          |
| Unit cell dimensions            | a = 5.6110(6) Å                                                 | a = 90°. |
|                                 | b = 7.1772(8) Å                                                 | b = 90°. |
|                                 | c = 25.602(3) Å                                                 | g = 90°. |
| Volume                          | 1031.0(2) Å <sup>3</sup>                                        |          |
| Z                               | 4                                                               |          |
| Density (calculated)            | 1.650 Mg/m <sup>3</sup>                                         |          |
| Absorption coefficient          | 3.959 mm <sup>-1</sup>                                          |          |
| F(000)                          | 512                                                             |          |
| Crystal size                    | 0.200 x 0.150 x 0.100 mm <sup>3</sup>                           |          |
| Theta range for data collection | 2.948 to 31.875°.                                               |          |
| Index ranges                    | -8 ≤ h ≤ 8, -10 ≤ k ≤ 10, -37 ≤ l ≤ 37                          |          |
| Reflections collected           | 13720                                                           |          |
| Independent reflections         | 3540 [R(int) = 0.0290]                                          |          |
| Completeness to theta = 25.000° | 99.9 %                                                          |          |

|                                   |                                             |
|-----------------------------------|---------------------------------------------|
| Absorption correction             | Semi-empirical from equivalents             |
| Max. and min. transmission        | 0.741 and 0.546                             |
| Refinement method                 | Full-matrix least-squares on F <sup>2</sup> |
| Data / restraints / parameters    | 3540 / 0 / 129                              |
| Goodness-of-fit on F <sup>2</sup> | 1.013                                       |
| Final R indices [I>2sigma(I)]     | R1 = 0.0360, wR2 = 0.0807                   |
| R indices (all data)              | R1 = 0.0547, wR2 = 0.0873                   |
| Absolute structure parameter      | 0.272(14)                                   |
| Extinction coefficient            | n/a                                         |
| Largest diff. peak and hole       | 0.691 and -0.528 e.Å <sup>-3</sup>          |

**Table 14.** Atomic coordinates (x 10<sup>4</sup>) and equivalent isotropic displacement parameters (Å<sup>2</sup> × 10<sup>3</sup>) for C10 H10 Br N O2 (**2a'**). U(eq) is defined as one third of the trace of the orthogonalized U<sup>ij</sup> tensor.

|       | x        | y        | z       | U(eq) |
|-------|----------|----------|---------|-------|
| Br(1) | 2011(1)  | 10502(1) | 3815(1) | 62(1) |
| O(1)  | 6339(6)  | 8912(4)  | 4718(1) | 66(1) |
| O(2)  | 7023(5)  | 5146(4)  | 4155(1) | 58(1) |
| N(1)  | 5240(5)  | 6449(4)  | 4166(1) | 44(1) |
| C(1)  | 5044(7)  | 8069(5)  | 4430(1) | 44(1) |
| C(2)  | 2502(6)  | 8278(5)  | 4221(1) | 43(1) |
| C(3)  | 2871(6)  | 6396(5)  | 3924(1) | 39(1) |
| C(4)  | 2805(6)  | 6341(4)  | 3335(1) | 34(1) |
| C(5)  | 4634(5)  | 7105(5)  | 3040(1) | 38(1) |
| C(6)  | 4497(6)  | 7100(5)  | 2502(1) | 40(1) |
| C(7)  | 2541(5)  | 6320(4)  | 2255(1) | 39(1) |
| C(8)  | 732(5)   | 5542(5)  | 2546(1) | 41(1) |
| C(9)  | 872(5)   | 5550(5)  | 3086(1) | 38(1) |
| C(10) | 6678(10) | 3740(6)  | 4536(2) | 65(1) |

**Table 15.** Bond lengths [Å] and angles [°] for C10 H10 Br N O2 (**2a'**).

---

|                 |          |
|-----------------|----------|
| Br(1)-C(2)      | 1.925(3) |
| O(1)-C(1)       | 1.199(4) |
| O(2)-N(1)       | 1.369(4) |
| O(2)-C(10)      | 1.417(5) |
| N(1)-C(1)       | 1.350(5) |
| N(1)-C(3)       | 1.466(4) |
| C(1)-C(2)       | 1.531(5) |
| C(2)-C(3)       | 1.564(5) |
| C(2)-H(2)       | 0.9800   |
| C(3)-C(4)       | 1.508(4) |
| C(3)-H(3)       | 0.9800   |
| C(4)-C(9)       | 1.380(4) |
| C(4)-C(5)       | 1.388(4) |
| C(5)-C(6)       | 1.378(5) |
| C(5)-H(5)       | 0.9300   |
| C(6)-C(7)       | 1.385(5) |
| C(6)-H(6)       | 0.9300   |
| C(7)-C(8)       | 1.378(5) |
| C(7)-H(7)       | 0.9300   |
| C(8)-C(9)       | 1.386(4) |
| C(8)-H(8)       | 0.9300   |
| C(9)-H(9)       | 0.9300   |
| C(10)-H(10A)    | 0.9600   |
| C(10)-H(10B)    | 0.9600   |
| C(10)-H(10C)    | 0.9600   |
|                 |          |
| N(1)-O(2)-C(10) | 111.9(3) |
| C(1)-N(1)-O(2)  | 131.1(3) |
| C(1)-N(1)-C(3)  | 99.2(3)  |
| O(2)-N(1)-C(3)  | 129.5(3) |
| O(1)-C(1)-N(1)  | 133.9(4) |
| O(1)-C(1)-C(2)  | 136.9(4) |
| N(1)-C(1)-C(2)  | 89.2(3)  |
| C(1)-C(2)-C(3)  | 87.8(3)  |

|                     |          |
|---------------------|----------|
| C(1)-C(2)-Br(1)     | 113.8(2) |
| C(3)-C(2)-Br(1)     | 118.2(2) |
| C(1)-C(2)-H(2)      | 111.7    |
| C(3)-C(2)-H(2)      | 111.7    |
| Br(1)-C(2)-H(2)     | 111.7    |
| N(1)-C(3)-C(4)      | 116.4(3) |
| N(1)-C(3)-C(2)      | 83.8(2)  |
| C(4)-C(3)-C(2)      | 120.3(3) |
| N(1)-C(3)-H(3)      | 111.2    |
| C(4)-C(3)-H(3)      | 111.2    |
| C(2)-C(3)-H(3)      | 111.2    |
| C(9)-C(4)-C(5)      | 119.5(3) |
| C(9)-C(4)-C(3)      | 119.4(3) |
| C(5)-C(4)-C(3)      | 121.1(3) |
| C(6)-C(5)-C(4)      | 120.1(3) |
| C(6)-C(5)-H(5)      | 119.9    |
| C(4)-C(5)-H(5)      | 119.9    |
| C(5)-C(6)-C(7)      | 120.1(3) |
| C(5)-C(6)-H(6)      | 119.9    |
| C(7)-C(6)-H(6)      | 119.9    |
| C(8)-C(7)-C(6)      | 120.0(3) |
| C(8)-C(7)-H(7)      | 120.0    |
| C(6)-C(7)-H(7)      | 120.0    |
| C(7)-C(8)-C(9)      | 119.8(3) |
| C(7)-C(8)-H(8)      | 120.1    |
| C(9)-C(8)-H(8)      | 120.1    |
| C(4)-C(9)-C(8)      | 120.5(3) |
| C(4)-C(9)-H(9)      | 119.8    |
| C(8)-C(9)-H(9)      | 119.8    |
| O(2)-C(10)-H(10A)   | 109.5    |
| O(2)-C(10)-H(10B)   | 109.5    |
| H(10A)-C(10)-H(10B) | 109.5    |
| O(2)-C(10)-H(10C)   | 109.5    |
| H(10A)-C(10)-H(10C) | 109.5    |
| H(10B)-C(10)-H(10C) | 109.5    |

Symmetry transformations used to generate equivalent atoms:

**Table 16.** Anisotropic displacement parameters ( $\text{\AA}^2 \times 10^3$ ) for C10 H10 Br N O2 (**2a'**). The anisotropic displacement factor exponent takes the form:  $-2p^2[ h^2 a^*2U^{11} + \dots + 2 h k a^* b^* U^{12} ]$

|       | U <sup>11</sup> | U <sup>22</sup> | U <sup>33</sup> | U <sup>23</sup> | U <sup>13</sup> | U <sup>12</sup> |
|-------|-----------------|-----------------|-----------------|-----------------|-----------------|-----------------|
| Br(1) | 91(1)           | 51(1)           | 43(1)           | -1(1)           | -12(1)          | 26(1)           |
| O(1)  | 77(2)           | 63(2)           | 58(2)           | 4(1)            | -28(2)          | -13(2)          |
| O(2)  | 48(1)           | 68(2)           | 57(1)           | 18(1)           | 7(1)            | 19(1)           |
| N(1)  | 40(1)           | 49(2)           | 43(1)           | 4(1)            | -7(1)           | 5(1)            |
| C(1)  | 52(2)           | 45(2)           | 35(2)           | 11(1)           | -6(1)           | -3(2)           |
| C(2)  | 47(2)           | 49(2)           | 33(1)           | 2(1)            | -2(1)           | 5(1)            |
| C(3)  | 36(1)           | 43(2)           | 37(1)           | 4(1)            | 1(1)            | -2(1)           |
| C(4)  | 34(1)           | 31(1)           | 38(1)           | -2(1)           | 0(1)            | 0(1)            |
| C(5)  | 31(2)           | 38(2)           | 44(2)           | -2(1)           | 2(1)            | -5(1)           |
| C(6)  | 39(2)           | 38(2)           | 42(2)           | 1(1)            | 7(1)            | 0(1)            |
| C(7)  | 44(2)           | 36(1)           | 37(1)           | -4(1)           | -2(1)           | 4(1)            |
| C(8)  | 35(2)           | 40(2)           | 48(2)           | -7(2)           | -7(1)           | -1(2)           |
| C(9)  | 31(1)           | 37(1)           | 47(2)           | 2(1)            | 3(1)            | -2(1)           |
| C(10) | 84(3)           | 46(2)           | 66(2)           | 14(2)           | -10(2)          | 6(2)            |

**Table 17.** Hydrogen coordinates ( $\times 10^4$ ) and isotropic displacement parameters ( $\text{\AA}^2 \times 10^3$ ) for C10 H10 Br N O2 (**2a'**).

|        | x    | y    | z    | U(eq) |
|--------|------|------|------|-------|
| H(2)   | 1317 | 8158 | 4500 | 51    |
| H(3)   | 1890 | 5403 | 4075 | 47    |
| H(5)   | 5955 | 7620 | 3205 | 45    |
| H(6)   | 5720 | 7620 | 2305 | 48    |
| H(7)   | 2449 | 6323 | 1892 | 47    |
| H(8)   | -579 | 5013 | 2380 | 49    |
| H(9)   | -345 | 5018 | 3283 | 46    |
| H(10A) | 7140 | 4205 | 4873 | 98    |
| H(10B) | 7632 | 2673 | 4450 | 98    |
| H(10C) | 5027 | 3388 | 4544 | 98    |

## 19. Computational Studies:

In the main manuscript geometry optimizations were performed in Gaussian 16 revision B.01<sup>40</sup> with M06-2X<sup>41</sup>/6-31G\*\*[LANL2DZ for Br]<sup>42,43</sup> with SMD<sup>44</sup> solvation model for acetonitrile. In Figure S1 below the same method and basis set was used, but the SMD model for trifluoroethanol was used instead of acetonitrile. Conformational structure searching was carried out using the CREST<sup>45</sup> code (6.2.3) with GFN2-xTB<sup>46</sup> and the lowest 10 were then optimized with M06-2X. Vibrational frequencies were calculated for verification of minima or transition states. The carbocation C-C bond rotation transition state was located using the nudged elastic band (NEB) method in ORCA 5.0<sup>47</sup> with M06-2X/def2-SVP (see Figure below for NEB profile). The resulting NEB structure was then further optimized in Gaussian 16 keeping the dihedral angle restrained. This provided the ability to have a M06-2X/6-31G\*\*[LANL2DZ for Br] energy with SMD solvation.

Because HFIP solvent is not available in Gaussian 16, for an estimate of a fluorinated alcohol solvent we re-optimized all structures presented in the main manuscript with the SMD solvent model for trifluoroethanol. The energy surface is shown in Figure S1. Comparison with the main manuscript shows very small energy differences compared to acetonitrile solvent.

---

<sup>40</sup> M. J. Frisch, G. W. Trucks, H. B. Schlegel, G. E. Scuseria, M. A. Robb, J. R. Cheeseman, G. Scalmani, V. Barone, G. A. Petersson, H. Nakatsuji, X. Li, M. Caricato, A. V. Marenich, J. Bloino, B. G. Janesko, R. Gomperts, B. Mennucci, H. P. Hratchian, J. V. Ortiz, A. F. Izmaylov, J. L. Sonnenberg, D. Williams-Young, F. Ding, F. Lipparini, F. Egidi, J. Goings, B. Peng, A. Petrone, T. Henderson, D. Ranasinghe, V. G. Zakrzewski, J. Gao, N. Rega, G. Zheng, W. Liang, M. Hada, M. Ehara, K. Toyota, R. Fukuda, J. Hasegawa, M. Ishida, T. Nakajima, Y. Honda, O. Kitao, H. Nakai, T. Vreven, K. Throssell, J. A. Montgomery Jr., J. E. Peralta, F. Ogliaro, M. J. Bearpark, J. J. Heyd, E. N. Brothers, K. N. Kudin, V. N. Staroverov, T. A. Keith, R. Kobayashi, J. Normand, K. Raghavachari, A. P. Rendell, J. C. Burant, S. S. Iyengar, J. Tomasi, M. Cossi, J. M. Millam, M. Klene, C. Adamo, R. Cammi, J. W. Ochterski, R. L. Martin, K. Morokuma, O. Farkas, J. B. Foresman and D. J. Fox, Gaussian 16, Revision B.01; Gaussian Inc., Wallingford CT, 2016.

<sup>41</sup> Y. Zhao and D. G. Truhlar, *Theor. Chem. Acc.*, **2008**, 120, 215–241.

<sup>42</sup> R. Ditchfield, W. J. Hehre and J. A. Pople, *J. Chem. Phys.*, **1971**, 54, 724–728.

<sup>43</sup> P. J. Hay and W. R. Wadt, *J. Chem. Phys.*, **1985**, 82, 270–283.

<sup>44</sup> A. V. Marenich, C. J. Cramer and D. G. Truhlar, *J. Phys. Chem. B.*, **2009**, 113, 6378–6396.

<sup>45</sup> P. Pracht, F. Bohle and S. Grimme, *Phys. Chem. Chem. Phys.*, **2020**, 22, 7169–7192.

<sup>46</sup> C. Bannwarth, S. Ehlert and S. Grimme, *J. Chem. Theory Comput.*, **2019**, 15, 1652–1671.

<sup>47</sup> F. Neese, Software update: The ORCA program system—Version 5.0, WIREs Computational Molecular Science, 2022, 12, e1606.

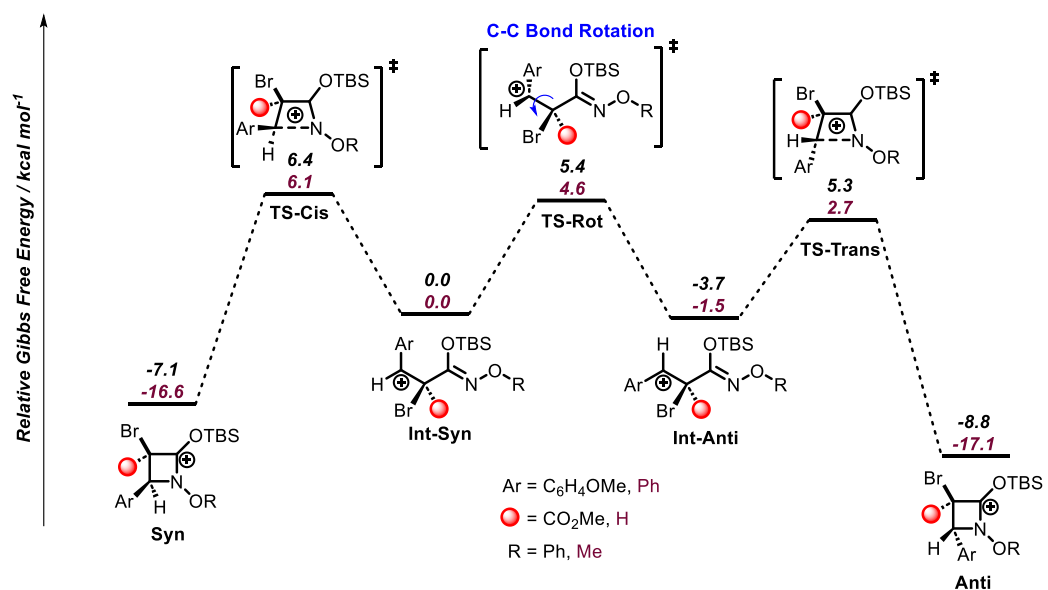

**Figure S1.** Energy surface for ring closing transition states and C–C bond rotation (derived from 1y and 1a') using the SMD trifluoroethanol solvent model.

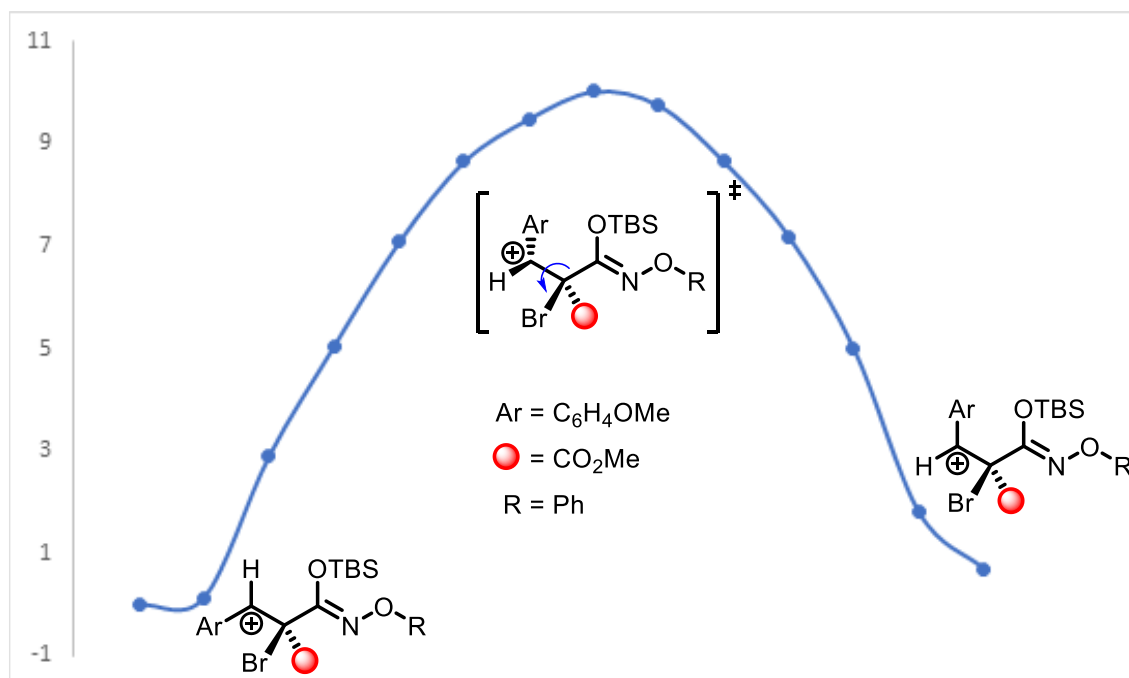

**Figure S2.** Lowest energy structure profile obtained from nudge elastic band calculations for C–C bond rotation.



Because there is no HFIP continuum solvent model in Gaussian, for the bromination reaction step we evaluated the thermodynamics for generating the carbocation intermediate. Assuming NBS is a source of Br<sub>2</sub>, Figure S3a shows the energy for forming the benzylic cation in the gas phase and implicit trifluoroethanol. Figure S3b shows the energy using two explicit HFIP molecules, which shows 16 kcal/mol reduction in the thermodynamic energy change that is likely linked to the kinetics of bromination.

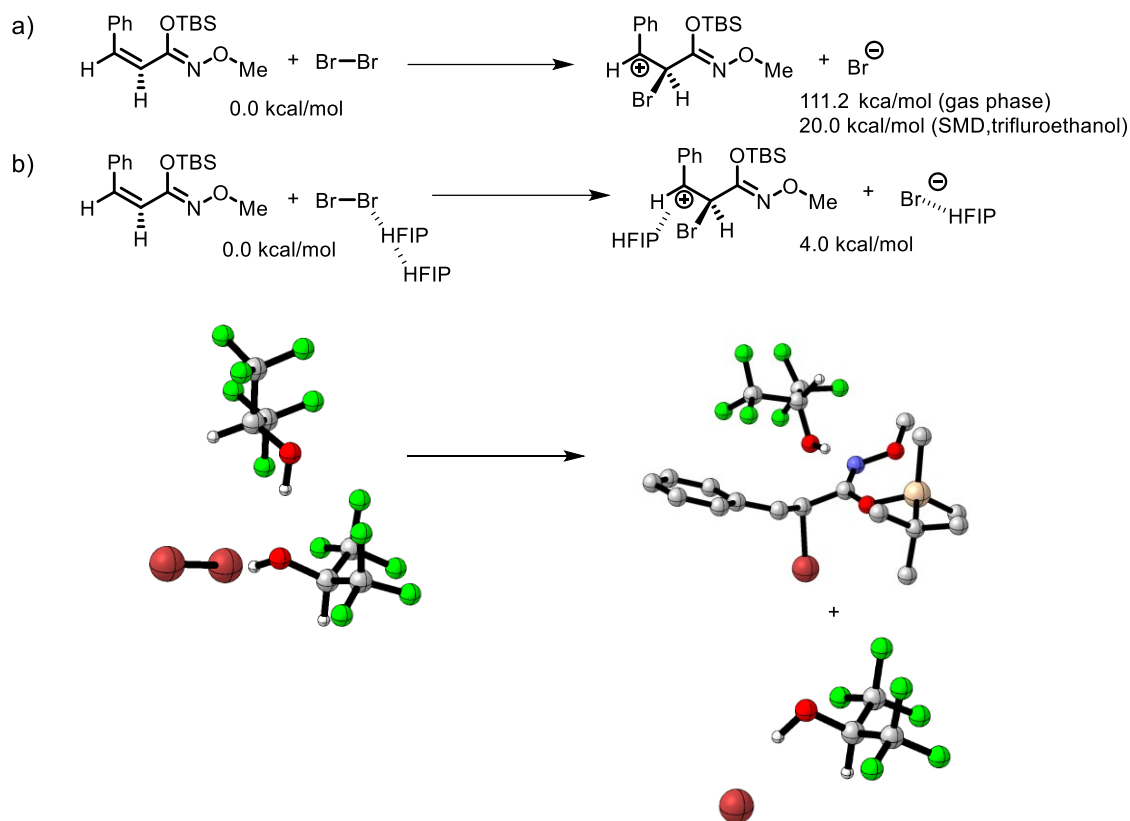

**Figure S3.** a) Thermodynamics for formation of the benzylic carbocation from 1a' in the gas phase and implicit trifluoroethanol b) with 2 explicit HFIP molecules. 3D depiction of explicitly solvated Br<sub>2</sub> and benzylic carbocation are included.

### Absolute Energies and Xyz Structures

| <b>1a' Int-Syn</b>                           |                             |
|----------------------------------------------|-----------------------------|
| Zero-point correction=                       | 0.384761 (Hartree/Particle) |
| Thermal correction to Energy=                | 0.410480                    |
| Thermal correction to Enthalpy=              | 0.411424                    |
| Thermal correction to Gibbs Free Energy=     | 0.326391                    |
| Sum of electronic and zero-point Energies=   | -1131.605445                |
| Sum of electronic and thermal Energies=      | -1131.579727                |
| Sum of electronic and thermal Enthalpies=    | -1131.578782                |
| Sum of electronic and thermal Free Energies= | -1131.663815                |

|    |                 |                 |                 |
|----|-----------------|-----------------|-----------------|
| C  | 4.321136000000  | 1.505084000000  | -0.557945000000 |
| C  | 5.632573000000  | 1.284832000000  | -0.206830000000 |
| C  | 3.309019000000  | 0.563565000000  | -0.180379000000 |
| H  | 6.407233000000  | 1.988247000000  | -0.487149000000 |
| C  | 5.957825000000  | 0.132063000000  | 0.520907000000  |
| C  | 3.670301000000  | -0.605225000000 | 0.565365000000  |
| H  | 2.916624000000  | -1.323242000000 | 0.867498000000  |
| C  | 4.984529000000  | -0.807738000000 | 0.906488000000  |
| H  | 5.276852000000  | -1.684858000000 | 1.471368000000  |
| H  | 4.030360000000  | 2.385201000000  | -1.123237000000 |
| C  | 2.014248000000  | 0.852571000000  | -0.562785000000 |
| C  | 0.822377000000  | 0.008189000000  | -0.336338000000 |
| C  | -0.387610000000 | 0.768900000000  | 0.105755000000  |
| N  | -0.276262000000 | 2.043732000000  | 0.147989000000  |
| O  | -1.417919000000 | 2.624570000000  | 0.647745000000  |
| Br | 0.483101000000  | -0.739821000000 | -2.210427000000 |
| C  | -1.416729000000 | 4.015728000000  | 0.346100000000  |
| H  | -0.537753000000 | 4.499323000000  | 0.781778000000  |
| H  | -1.433761000000 | 4.175640000000  | -0.736024000000 |
| O  | -1.424153000000 | 0.023671000000  | 0.443288000000  |
| Si | -3.118750000000 | 0.365352000000  | 0.255287000000  |
| C  | -3.807525000000 | -1.377136000000 | 0.020523000000  |
| C  | -3.782426000000 | 1.118328000000  | 1.830225000000  |
| H  | -3.277680000000 | 0.689667000000  | 2.702063000000  |
| H  | -3.638679000000 | 2.200779000000  | 1.850874000000  |
| H  | -4.852924000000 | 0.909107000000  | 1.929560000000  |
| C  | -3.338856000000 | 1.413164000000  | -1.280985000000 |
| H  | -3.595912000000 | 2.443200000000  | -1.017841000000 |
| H  | -2.415961000000 | 1.440753000000  | -1.871818000000 |
| H  | -4.129802000000 | 1.014958000000  | -1.924055000000 |
| C  | -3.130505000000 | -2.049220000000 | -1.180315000000 |
| H  | -2.056646000000 | -2.179244000000 | -1.012199000000 |
| H  | -3.566850000000 | -3.042014000000 | -1.353862000000 |
| H  | -3.257073000000 | -1.466125000000 | -2.100649000000 |
| C  | -5.320233000000 | -1.292370000000 | -0.231072000000 |
| H  | -5.733634000000 | -2.301365000000 | -0.359946000000 |
| H  | -5.850602000000 | -0.825706000000 | 0.606645000000  |
| H  | -5.554224000000 | -0.724322000000 | -1.138577000000 |
| C  | -3.551271000000 | -2.211285000000 | 1.283201000000  |
| H  | -4.059550000000 | -1.788931000000 | 2.157450000000  |
| H  | -3.928261000000 | -3.233302000000 | 1.143876000000  |
| H  | -2.481887000000 | -2.280054000000 | 1.512212000000  |
| H  | 1.834920000000  | 1.780410000000  | -1.102997000000 |
| H  | -2.325282000000 | 4.416453000000  | 0.797116000000  |

|   |                |                 |                |
|---|----------------|-----------------|----------------|
| H | 6.993372000000 | -0.042089000000 | 0.797678000000 |
| H | 0.974122000000 | -0.873621000000 | 0.282343000000 |

**1a' Int-Anti**

|                                              |                             |
|----------------------------------------------|-----------------------------|
| Zero-point correction=                       | 0.384861 (Hartree/Particle) |
| Thermal correction to Energy=                | 0.410583                    |
| Thermal correction to Enthalpy=              | 0.411527                    |
| Thermal correction to Gibbs Free Energy=     | 0.326780                    |
| Sum of electronic and zero-point Energies=   | -1131.605187                |
| Sum of electronic and thermal Energies=      | -1131.579465                |
| Sum of electronic and thermal Enthalpies=    | -1131.578521                |
| Sum of electronic and thermal Free Energies= | -1131.663268                |

|    |                 |                 |                 |
|----|-----------------|-----------------|-----------------|
| C  | -0.211787000000 | 0.749717000000  | -0.009867000000 |
| C  | 1.142242000000  | 0.782287000000  | -0.603926000000 |
| N  | -0.011046000000 | -1.584707000000 | -0.248678000000 |
| C  | -0.775918000000 | -0.629588000000 | 0.127356000000  |
| H  | 1.283719000000  | 0.152675000000  | -1.480370000000 |
| O  | -1.970719000000 | -0.694519000000 | 0.684950000000  |
| Br | -1.294323000000 | 1.786989000000  | -1.397210000000 |
| C  | 2.211023000000  | 1.546778000000  | -0.179997000000 |
| C  | 2.170739000000  | 2.394095000000  | 0.974553000000  |
| C  | 3.413587000000  | 1.459004000000  | -0.954399000000 |
| C  | 3.286881000000  | 3.114754000000  | 1.320820000000  |
| C  | 4.521454000000  | 2.188881000000  | -0.591546000000 |
| C  | 4.453290000000  | 3.011945000000  | 0.540839000000  |
| H  | 1.272025000000  | 2.464428000000  | 1.577002000000  |
| H  | 3.426395000000  | 0.810196000000  | -1.825030000000 |
| H  | 3.276348000000  | 3.760212000000  | 2.190968000000  |
| H  | 5.436109000000  | 2.132513000000  | -1.169248000000 |
| O  | -0.565726000000 | -2.811886000000 | 0.024025000000  |
| Si | -3.264424000000 | -1.827472000000 | 0.446488000000  |
| C  | -3.161938000000 | -3.179124000000 | 1.728509000000  |
| H  | -3.958637000000 | -3.910445000000 | 1.552758000000  |
| H  | -2.203340000000 | -3.700070000000 | 1.678290000000  |
| H  | -3.290536000000 | -2.781319000000 | 2.740089000000  |
| C  | -3.218140000000 | -2.443386000000 | -1.318972000000 |
| H  | -4.234439000000 | -2.583538000000 | -1.702378000000 |
| H  | -2.715329000000 | -1.722746000000 | -1.974264000000 |
| H  | -2.688736000000 | -3.396799000000 | -1.393249000000 |
| C  | -4.777698000000 | -0.738423000000 | 0.749551000000  |
| C  | -4.948840000000 | 0.256540000000  | -0.405397000000 |
| H  | -5.828642000000 | 0.890139000000  | -0.230670000000 |
| H  | -4.078450000000 | 0.914938000000  | -0.500100000000 |

|   |                 |                 |                 |
|---|-----------------|-----------------|-----------------|
| H | -5.092882000000 | -0.252377000000 | -1.365135000000 |
| C | -6.018085000000 | -1.641043000000 | 0.831204000000  |
| H | -6.149367000000 | -2.243312000000 | -0.075910000000 |
| H | -5.967917000000 | -2.323839000000 | 1.686573000000  |
| H | -6.920754000000 | -1.027373000000 | 0.949930000000  |
| C | -4.628222000000 | 0.036560000000  | 2.065214000000  |
| H | -4.501828000000 | -0.634237000000 | 2.922673000000  |
| H | -3.769650000000 | 0.715582000000  | 2.035761000000  |
| H | -5.526741000000 | 0.640525000000  | 2.249319000000  |
| C | 0.137659000000  | -3.823412000000 | -0.689275000000 |
| H | -0.329921000000 | -4.765565000000 | -0.400964000000 |
| H | 0.041400000000  | -3.672039000000 | -1.768461000000 |
| H | 5.327993000000  | 3.588323000000  | 0.827274000000  |
| H | 1.193713000000  | -3.826527000000 | -0.404938000000 |
| H | -0.341776000000 | 1.316100000000  | 0.910008000000  |

### 1a' TS-Rot

|                                              |                             |
|----------------------------------------------|-----------------------------|
| Zero-point correction=                       | 0.384213 (Hartree/Particle) |
| Thermal correction to Energy=                | 0.409082                    |
| Thermal correction to Enthalpy=              | 0.410026                    |
| Thermal correction to Gibbs Free Energy=     | 0.328648                    |
| Sum of electronic and zero-point Energies=   | -1131.600073                |
| Sum of electronic and thermal Energies=      | -1131.575204                |
| Sum of electronic and thermal Enthalpies=    | -1131.574260                |
| Sum of electronic and thermal Free Energies= | -1131.655637                |

Frequency = -34.3262

|    |                 |                 |                 |
|----|-----------------|-----------------|-----------------|
| C  | 4.533932000000  | 1.011820000000  | -1.953724000000 |
| C  | 5.657970000000  | 1.332422000000  | -1.227569000000 |
| C  | 3.394396000000  | 0.442478000000  | -1.296684000000 |
| H  | 6.525112000000  | 1.766231000000  | -1.710582000000 |
| C  | 5.667526000000  | 1.088893000000  | 0.151579000000  |
| C  | 3.433558000000  | 0.201322000000  | 0.116743000000  |
| H  | 2.583745000000  | -0.244720000000 | 0.623640000000  |
| C  | 4.564615000000  | 0.523551000000  | 0.821770000000  |
| H  | 4.618065000000  | 0.345192000000  | 1.889056000000  |
| H  | 4.485948000000  | 1.186302000000  | -3.024386000000 |
| C  | 2.298576000000  | 0.159136000000  | -2.082746000000 |
| C  | 1.028444000000  | -0.449534000000 | -1.594259000000 |
| C  | 0.225606000000  | 0.464833000000  | -0.709364000000 |
| N  | 0.487666000000  | 1.714183000000  | -0.808205000000 |
| O  | -0.288934000000 | 2.450283000000  | 0.059579000000  |
| Br | -0.129004000000 | -1.011658000000 | -3.149739000000 |

|    |                 |                 |                 |
|----|-----------------|-----------------|-----------------|
| C  | -0.262563000000 | 3.819830000000  | -0.326622000000 |
| H  | 0.762813000000  | 4.200474000000  | -0.312943000000 |
| H  | -0.695053000000 | 3.948818000000  | -1.323343000000 |
| O  | -0.671168000000 | -0.129520000000 | 0.055333000000  |
| Si | -2.270794000000 | 0.423980000000  | 0.457439000000  |
| C  | -3.181585000000 | -1.221478000000 | 0.623458000000  |
| C  | -2.228912000000 | 1.308749000000  | 2.101937000000  |
| H  | -1.475936000000 | 0.861013000000  | 2.758577000000  |
| H  | -1.991543000000 | 2.368258000000  | 1.983890000000  |
| H  | -3.199296000000 | 1.224523000000  | 2.602849000000  |
| C  | -2.910794000000 | 1.443159000000  | -0.976966000000 |
| H  | -2.963661000000 | 2.502385000000  | -0.708894000000 |
| H  | -2.250584000000 | 1.351938000000  | -1.847461000000 |
| H  | -3.909034000000 | 1.116258000000  | -1.284420000000 |
| C  | -3.050900000000 | -2.026405000000 | -0.675294000000 |
| H  | -2.006974000000 | -2.280451000000 | -0.885527000000 |
| H  | -3.617251000000 | -2.964184000000 | -0.597333000000 |
| H  | -3.440791000000 | -1.474507000000 | -1.539158000000 |
| C  | -4.666544000000 | -0.951320000000 | 0.906496000000  |
| H  | -5.203151000000 | -1.902321000000 | 1.021701000000  |
| H  | -4.811518000000 | -0.379591000000 | 1.830121000000  |
| H  | -5.145834000000 | -0.401614000000 | 0.088643000000  |
| C  | -2.584106000000 | -2.027595000000 | 1.785142000000  |
| H  | -2.700361000000 | -1.506433000000 | 2.742175000000  |
| H  | -3.092857000000 | -2.996840000000 | 1.873162000000  |
| H  | -1.517061000000 | -2.225448000000 | 1.633433000000  |
| H  | 2.402182000000  | 0.329763000000  | -3.153229000000 |
| H  | -0.866525000000 | 4.347243000000  | 0.412785000000  |
| H  | 6.555067000000  | 1.340054000000  | 0.724882000000  |
| H  | 1.237183000000  | -1.382146000000 | -1.060835000000 |

#### 1a' TS-Cis

|                                              |                             |
|----------------------------------------------|-----------------------------|
| Zero-point correction=                       | 0.384020 (Hartree/Particle) |
| Thermal correction to Energy=                | 0.409057                    |
| Thermal correction to Enthalpy=              | 0.410001                    |
| Thermal correction to Gibbs Free Energy=     | 0.326401                    |
| Sum of electronic and zero-point Energies=   | -1131.595511                |
| Sum of electronic and thermal Energies=      | -1131.570474                |
| Sum of electronic and thermal Enthalpies=    | -1131.569530                |
| Sum of electronic and thermal Free Energies= | -1131.653130                |

Frequency = -211.8450

|   |                 |                |                 |
|---|-----------------|----------------|-----------------|
| C | -0.766525000000 | 0.753003000000 | -1.097925000000 |
|---|-----------------|----------------|-----------------|

|    |                 |                 |                 |
|----|-----------------|-----------------|-----------------|
| C  | -2.052326000000 | -0.017125000000 | -1.222313000000 |
| N  | -0.444365000000 | -1.411147000000 | -0.598316000000 |
| C  | 0.221639000000  | -0.327317000000 | -0.810115000000 |
| H  | -0.548226000000 | 1.223751000000  | -2.059508000000 |
| H  | -2.210722000000 | -0.366972000000 | -2.242008000000 |
| O  | 1.501606000000  | -0.117562000000 | -0.897407000000 |
| Br | -0.657875000000 | 2.263915000000  | 0.213293000000  |
| C  | -3.138191000000 | -0.153105000000 | -0.341194000000 |
| C  | -3.057269000000 | 0.075130000000  | 1.058625000000  |
| C  | -4.364771000000 | -0.581508000000 | -0.913933000000 |
| C  | -4.180454000000 | -0.090092000000 | 1.839804000000  |
| C  | -5.491320000000 | -0.712060000000 | -0.123287000000 |
| C  | -5.396086000000 | -0.465287000000 | 1.247850000000  |
| H  | -2.110123000000 | 0.330993000000  | 1.516946000000  |
| H  | -4.408402000000 | -0.780360000000 | -1.980410000000 |
| H  | -4.125868000000 | 0.065917000000  | 2.910986000000  |
| H  | -6.435413000000 | -1.015751000000 | -0.560254000000 |
| H  | -6.276517000000 | -0.579409000000 | 1.872679000000  |
| O  | 0.309864000000  | -2.544870000000 | -0.547805000000 |
| Si | 2.833099000000  | -0.952524000000 | -0.123289000000 |
| C  | 3.424686000000  | -2.302453000000 | -1.261264000000 |
| H  | 3.738940000000  | -1.901782000000 | -2.229672000000 |
| H  | 4.284442000000  | -2.810535000000 | -0.810804000000 |
| H  | 2.640468000000  | -3.044835000000 | -1.428465000000 |
| C  | 2.245775000000  | -1.552690000000 | 1.546395000000  |
| H  | 3.030304000000  | -1.412662000000 | 2.297527000000  |
| H  | 1.364873000000  | -0.993127000000 | 1.882246000000  |
| H  | 1.987371000000  | -2.614559000000 | 1.518631000000  |
| C  | 4.078705000000  | 0.452270000000  | 0.028577000000  |
| C  | 3.542734000000  | 1.508764000000  | 1.004145000000  |
| H  | 3.386741000000  | 1.095719000000  | 2.007167000000  |
| H  | 4.259508000000  | 2.335468000000  | 1.093983000000  |
| H  | 2.591282000000  | 1.928848000000  | 0.658778000000  |
| C  | 5.400200000000  | -0.118699000000 | 0.564182000000  |
| H  | 6.128479000000  | 0.691275000000  | 0.700372000000  |
| H  | 5.271996000000  | -0.611008000000 | 1.535323000000  |
| H  | 5.839555000000  | -0.844294000000 | -0.129422000000 |
| C  | 4.323063000000  | 1.101084000000  | -1.340391000000 |
| H  | 4.718330000000  | 0.382730000000  | -2.067274000000 |
| H  | 3.404721000000  | 1.532860000000  | -1.752145000000 |
| H  | 5.058317000000  | 1.910663000000  | -1.243497000000 |
| C  | -0.365487000000 | -3.541256000000 | 0.224569000000  |
| H  | -0.519673000000 | -3.189440000000 | 1.248382000000  |
| H  | -1.324231000000 | -3.788265000000 | -0.238942000000 |

H 0.292142000000 -4.410361000000 0.216374000000

**1a' TS-Trans**

Zero-point correction= 0.384227 (Hartree/Particle)

Thermal correction to Energy= 0.409231

Thermal correction to Enthalpy= 0.410175

Thermal correction to Gibbs Free Energy= 0.327484

Sum of electronic and zero-point Energies= -1131.600322

Sum of electronic and thermal Energies= -1131.575318

Sum of electronic and thermal Enthalpies= -1131.574374

Sum of electronic and thermal Free Energies= -1131.657065

Frequency = -202.2218

C -0.533693000000 1.330441000000 -0.314670000000  
C 0.826108000000 1.025259000000 -0.880170000000  
N -0.064984000000 -0.839599000000 -0.250545000000  
C -1.022670000000 -0.034749000000 0.043349000000  
H 0.850852000000 0.682791000000 -1.911342000000  
O -2.179985000000 -0.236901000000 0.598572000000  
Br -1.696200000000 2.175204000000 -1.716250000000  
C 2.054900000000 1.370832000000 -0.290126000000  
C 2.162845000000 1.898733000000 1.023301000000  
C 3.224618000000 1.155390000000 -1.064853000000  
C 3.408189000000 2.206085000000 1.530423000000  
C 4.464901000000 1.472967000000 -0.546281000000  
C 4.552070000000 1.995279000000 0.747623000000  
H 1.278168000000 2.057729000000 1.630709000000  
H 3.125878000000 0.746741000000 -2.066299000000  
H 3.504838000000 2.609692000000 2.531654000000  
H 5.362319000000 1.318149000000 -1.133878000000  
O -0.221276000000 -2.136998000000 0.139948000000  
Si -3.207697000000 -1.654909000000 0.545845000000  
C -2.783229000000 -2.738028000000 1.999695000000  
H -3.425054000000 -3.625788000000 1.996345000000  
H -1.743470000000 -3.070471000000 1.948333000000  
H -2.936163000000 -2.214166000000 2.948032000000  
C -2.970976000000 -2.467997000000 -1.119825000000  
H -3.930665000000 -2.832649000000 -1.501094000000  
H -2.574735000000 -1.758052000000 -1.855174000000  
H -2.285317000000 -3.316995000000 -1.056795000000  
C -4.908765000000 -0.863895000000 0.711239000000  
C -5.202793000000 -0.014426000000 -0.532463000000  
H -6.192593000000 0.452069000000 -0.443337000000

|   |                 |                 |                 |
|---|-----------------|-----------------|-----------------|
| H | -4.466228000000 | 0.787736000000  | -0.654401000000 |
| H | -5.201991000000 | -0.617210000000 | -1.447695000000 |
| C | -5.957738000000 | -1.979536000000 | 0.832600000000  |
| H | -5.944692000000 | -2.653703000000 | -0.031960000000 |
| H | -5.806772000000 | -2.581811000000 | 1.735472000000  |
| H | -6.962528000000 | -1.541443000000 | 0.891699000000  |
| C | -4.965895000000 | 0.025088000000  | 1.960665000000  |
| H | -4.773571000000 | -0.545787000000 | 2.875873000000  |
| H | -4.238105000000 | 0.841741000000  | 1.908717000000  |
| H | -5.963943000000 | 0.472781000000  | 2.054611000000  |
| C | 0.512118000000  | -2.999092000000 | -0.735311000000 |
| H | 0.356338000000  | -4.005390000000 | -0.346927000000 |
| H | 0.129047000000  | -2.921584000000 | -1.756425000000 |
| H | 5.526597000000  | 2.243487000000  | 1.156833000000  |
| H | 1.574773000000  | -2.743660000000 | -0.708647000000 |
| H | -0.542842000000 | 2.021369000000  | 0.526390000000  |

#### 1a' Int-Cis

|                                              |                             |
|----------------------------------------------|-----------------------------|
| Zero-point correction=                       | 0.387358 (Hartree/Particle) |
| Thermal correction to Energy=                | 0.411966                    |
| Thermal correction to Enthalpy=              | 0.412910                    |
| Thermal correction to Gibbs Free Energy=     | 0.331670                    |
| Sum of electronic and zero-point Energies=   | -1131.632348                |
| Sum of electronic and thermal Energies=      | -1131.607740                |
| Sum of electronic and thermal Enthalpies=    | -1131.606795                |
| Sum of electronic and thermal Free Energies= | -1131.688035                |

|    |                 |                 |                 |
|----|-----------------|-----------------|-----------------|
| C  | 0.760346000000  | 1.024842000000  | 0.112468000000  |
| C  | 1.370963000000  | -0.151907000000 | 0.954566000000  |
| N  | 0.042783000000  | -0.780605000000 | 0.733018000000  |
| C  | -0.473424000000 | 0.171378000000  | 0.000913000000  |
| O  | -1.568710000000 | 0.338902000000  | -0.604004000000 |
| Br | 1.582020000000  | 1.425064000000  | -1.636529000000 |
| C  | 2.532499000000  | -0.941694000000 | 0.435831000000  |
| C  | 3.797774000000  | -0.689369000000 | 0.968218000000  |
| C  | 2.372628000000  | -1.900089000000 | -0.567232000000 |
| C  | 4.904718000000  | -1.382691000000 | 0.487176000000  |
| C  | 3.480658000000  | -2.599124000000 | -1.037361000000 |
| C  | 4.746381000000  | -2.338815000000 | -0.514492000000 |
| H  | 3.911498000000  | 0.049707000000  | 1.756503000000  |
| H  | 1.388403000000  | -2.112280000000 | -0.977124000000 |
| H  | 5.887843000000  | -1.182622000000 | 0.900656000000  |
| H  | 3.354363000000  | -3.348314000000 | -1.812102000000 |
| O  | -0.445595000000 | -1.984802000000 | 1.080731000000  |



|    |                 |                 |                 |
|----|-----------------|-----------------|-----------------|
| Si | -2.955229000000 | -0.711038000000 | -1.032204000000 |
| C  | -3.538276000000 | 0.138905000000  | -2.575207000000 |
| H  | -2.811867000000 | 0.008995000000  | -3.383248000000 |
| H  | -4.490987000000 | -0.288244000000 | -2.905451000000 |
| H  | -3.683358000000 | 1.209981000000  | -2.407910000000 |
| C  | -2.284409000000 | -2.415987000000 | -1.349022000000 |
| H  | -2.174403000000 | -3.006915000000 | -0.437592000000 |
| H  | -2.980575000000 | -2.935472000000 | -2.017265000000 |
| H  | -1.315424000000 | -2.369884000000 | -1.857917000000 |
| C  | -4.138227000000 | -0.572192000000 | 0.418999000000  |
| C  | -4.711095000000 | 0.849637000000  | 0.494192000000  |
| H  | -5.273239000000 | 1.108145000000  | -0.409333000000 |
| H  | -5.397282000000 | 0.925916000000  | 1.347011000000  |
| H  | -3.924321000000 | 1.599955000000  | 0.632760000000  |
| C  | -5.276889000000 | -1.576658000000 | 0.173902000000  |
| H  | -4.909555000000 | -2.608483000000 | 0.141130000000  |
| H  | -6.007586000000 | -1.509459000000 | 0.989659000000  |
| H  | -5.809678000000 | -1.372533000000 | -0.762061000000 |
| C  | -3.430543000000 | -0.914887000000 | 1.735902000000  |
| H  | -2.614746000000 | -0.214433000000 | 1.955324000000  |
| H  | -4.146014000000 | -0.849897000000 | 2.565339000000  |
| H  | -3.023869000000 | -1.932017000000 | 1.727792000000  |
| C  | -0.305353000000 | -2.196364000000 | 2.505422000000  |
| H  | -0.791542000000 | -3.153794000000 | 2.684923000000  |
| H  | 0.753814000000  | -2.255641000000 | 2.767924000000  |
| H  | 1.501208000000  | 0.137882000000  | 1.999363000000  |
| H  | -0.804976000000 | -1.396528000000 | 3.055515000000  |
| H  | 5.608120000000  | -2.885714000000 | -0.883657000000 |
| H  | 0.626043000000  | 1.961442000000  | 0.650240000000  |

### 1a' Int-Trans

|                                              |                             |
|----------------------------------------------|-----------------------------|
| Zero-point correction=                       | 0.387039 (Hartree/Particle) |
| Thermal correction to Energy=                | 0.411987                    |
| Thermal correction to Enthalpy=              | 0.412932                    |
| Thermal correction to Gibbs Free Energy=     | 0.330380                    |
| Sum of electronic and zero-point Energies=   | -1131.631974                |
| Sum of electronic and thermal Energies=      | -1131.607025                |
| Sum of electronic and thermal Enthalpies=    | -1131.606081                |
| Sum of electronic and thermal Free Energies= | -1131.688632                |

|   |                 |                 |                |
|---|-----------------|-----------------|----------------|
| C | 0.602329000000  | -0.740447000000 | 0.715812000000 |
| C | 1.720682000000  | 0.295124000000  | 1.070731000000 |
| N | 0.576537000000  | 1.241091000000  | 1.189001000000 |
| C | -0.373154000000 | 0.395635000000  | 0.899094000000 |

|    |                 |                 |                 |
|----|-----------------|-----------------|-----------------|
| O  | -1.622955000000 | 0.581083000000  | 0.845750000000  |
| Br | 0.313225000000  | -2.207444000000 | 2.015409000000  |
| C  | 2.715004000000  | 0.661899000000  | 0.011495000000  |
| C  | 2.290131000000  | 1.088919000000  | -1.250560000000 |
| C  | 4.076998000000  | 0.576714000000  | 0.299908000000  |
| C  | 3.230162000000  | 1.420100000000  | -2.220119000000 |
| C  | 5.015662000000  | 0.905710000000  | -0.675534000000 |
| C  | 4.592783000000  | 1.326997000000  | -1.933812000000 |
| H  | 1.228650000000  | 1.168049000000  | -1.477302000000 |
| H  | 4.398149000000  | 0.252833000000  | 1.285922000000  |
| H  | 2.900536000000  | 1.753282000000  | -3.198698000000 |
| H  | 6.074720000000  | 0.837136000000  | -0.449644000000 |
| O  | 0.523149000000  | 2.576222000000  | 1.313094000000  |
| Si | -2.909661000000 | -0.343187000000 | 0.019022000000  |
| C  | -2.077572000000 | -1.662878000000 | -0.993961000000 |
| H  | -1.337499000000 | -1.250120000000 | -1.686833000000 |
| H  | -1.603474000000 | -2.432297000000 | -0.377591000000 |
| H  | -2.847921000000 | -2.163036000000 | -1.591917000000 |
| C  | -3.949424000000 | -0.984388000000 | 1.414684000000  |
| H  | -4.879917000000 | -1.408123000000 | 1.022185000000  |
| H  | -3.427502000000 | -1.771850000000 | 1.966876000000  |
| H  | -4.207365000000 | -0.182710000000 | 2.112624000000  |
| C  | -3.706742000000 | 1.004437000000  | -1.016206000000 |
| C  | -4.740279000000 | 0.348001000000  | -1.945639000000 |
| H  | -5.506824000000 | -0.200911000000 | -1.386192000000 |
| H  | -5.251687000000 | 1.122740000000  | -2.530507000000 |
| H  | -4.270227000000 | -0.344484000000 | -2.652241000000 |
| C  | -4.407457000000 | 2.019006000000  | -0.102062000000 |
| H  | -5.215506000000 | 1.554481000000  | 0.473122000000  |
| H  | -3.709158000000 | 2.484290000000  | 0.602767000000  |
| H  | -4.848617000000 | 2.819173000000  | -0.709626000000 |
| C  | -2.638474000000 | 1.717156000000  | -1.857878000000 |
| H  | -1.901537000000 | 2.230959000000  | -1.230064000000 |
| H  | -2.104387000000 | 1.022130000000  | -2.515901000000 |
| H  | -3.115217000000 | 2.473382000000  | -2.494031000000 |
| C  | 1.214179000000  | 2.998726000000  | 2.511532000000  |
| H  | 2.274453000000  | 2.742426000000  | 2.441131000000  |
| H  | 1.088082000000  | 4.079698000000  | 2.529363000000  |
| H  | 2.187277000000  | 0.115941000000  | 2.041195000000  |
| H  | 0.754147000000  | 2.538150000000  | 3.387932000000  |
| H  | 5.323711000000  | 1.587631000000  | -2.692561000000 |
| H  | 0.663984000000  | -1.164852000000 | -0.285568000000 |

### 1y Int-Syn

Zero-point correction= 0.543235 (Hartree/Particle)  
Thermal correction to Energy= 0.580046  
Thermal correction to Enthalpy= 0.580991  
Thermal correction to Gibbs Free Energy= 0.470530  
Sum of electronic and zero-point Energies= -1704.696240  
Sum of electronic and thermal Energies= -1704.659429  
Sum of electronic and thermal Enthalpies= -1704.658485  
Sum of electronic and thermal Free Energies= -1704.768945

|    |                 |                 |                 |
|----|-----------------|-----------------|-----------------|
| C  | 2.967431000000  | -2.323894000000 | -0.633967000000 |
| C  | 4.209765000000  | -2.082233000000 | -0.139094000000 |
| C  | 1.792524000000  | -1.650214000000 | -0.120268000000 |
| H  | 5.076810000000  | -2.586145000000 | -0.545937000000 |
| C  | 4.341006000000  | -1.156110000000 | 0.936503000000  |
| C  | 1.969641000000  | -0.712211000000 | 0.974290000000  |
| H  | 1.115769000000  | -0.202327000000 | 1.399219000000  |
| C  | 3.199412000000  | -0.496538000000 | 1.495453000000  |
| H  | 3.365009000000  | 0.190428000000  | 2.317036000000  |
| H  | 2.836001000000  | -3.031820000000 | -1.446840000000 |
| C  | 0.609261000000  | -1.957163000000 | -0.720176000000 |
| C  | -0.742067000000 | -1.381965000000 | -0.398542000000 |
| C  | -0.769125000000 | 0.128677000000  | -0.273676000000 |
| N  | 0.118241000000  | 0.777021000000  | -0.919854000000 |
| O  | 0.002204000000  | 2.133768000000  | -0.720293000000 |
| Br | -1.987718000000 | -1.827626000000 | -1.938777000000 |
| C  | 1.039212000000  | 2.799069000000  | -1.452801000000 |
| H  | 0.960896000000  | 2.527755000000  | -2.510266000000 |
| H  | 0.803490000000  | 3.859566000000  | -1.334665000000 |
| O  | -1.729063000000 | 0.590925000000  | 0.511096000000  |
| Si | -2.757644000000 | 1.977582000000  | 0.339690000000  |
| C  | -4.294994000000 | 1.350098000000  | 1.237225000000  |
| C  | -2.002510000000 | 3.434632000000  | 1.229363000000  |
| H  | -1.504693000000 | 3.108644000000  | 2.148285000000  |
| H  | -1.265662000000 | 3.945207000000  | 0.605038000000  |
| H  | -2.780174000000 | 4.154226000000  | 1.506566000000  |
| C  | -3.058604000000 | 2.251870000000  | -1.481720000000 |
| H  | -2.201262000000 | 2.737687000000  | -1.954881000000 |
| H  | -3.245884000000 | 1.303618000000  | -1.996287000000 |
| H  | -3.938261000000 | 2.888365000000  | -1.627224000000 |
| C  | -5.364652000000 | 2.449943000000  | 1.278280000000  |
| H  | -6.264254000000 | 2.078924000000  | 1.786956000000  |
| H  | -5.020719000000 | 3.335525000000  | 1.823929000000  |
| H  | -5.663961000000 | 2.766137000000  | 0.272290000000  |

|   |                 |                 |                 |
|---|-----------------|-----------------|-----------------|
| C | -3.911858000000 | 0.954771000000  | 2.670310000000  |
| H | -3.127091000000 | 0.189330000000  | 2.679386000000  |
| H | -3.551323000000 | 1.815428000000  | 3.245484000000  |
| H | -4.784918000000 | 0.546470000000  | 3.196874000000  |
| C | -4.852981000000 | 0.123606000000  | 0.502953000000  |
| H | -5.724407000000 | -0.273299000000 | 1.041181000000  |
| H | -5.178349000000 | 0.374219000000  | -0.513491000000 |
| H | -4.108584000000 | -0.677214000000 | 0.430684000000  |
| O | 5.477747000000  | -0.845952000000 | 1.483840000000  |
| C | 6.709572000000  | -1.376026000000 | 0.955298000000  |
| H | 6.810119000000  | -1.099547000000 | -0.096403000000 |
| H | 7.495471000000  | -0.913393000000 | 1.547425000000  |
| H | 6.729800000000  | -2.460571000000 | 1.077127000000  |
| H | 0.629351000000  | -2.719353000000 | -1.495191000000 |
| C | -1.264498000000 | -1.970120000000 | 0.940987000000  |
| O | -0.574191000000 | -1.899139000000 | 1.926710000000  |
| O | -2.468204000000 | -2.485955000000 | 0.876942000000  |
| C | -3.004808000000 | -2.962478000000 | 2.126607000000  |
| H | -4.005631000000 | -3.318515000000 | 1.892710000000  |
| H | -2.384016000000 | -3.774146000000 | 2.509076000000  |
| H | -3.043711000000 | -2.146908000000 | 2.850304000000  |
| C | 2.411855000000  | 2.484122000000  | -0.914968000000 |
| C | 3.279507000000  | 1.647700000000  | -1.620089000000 |
| C | 2.827902000000  | 3.030221000000  | 0.303423000000  |
| C | 4.560374000000  | 1.386252000000  | -1.133356000000 |
| C | 4.104336000000  | 2.768534000000  | 0.793831000000  |
| C | 4.976902000000  | 1.954263000000  | 0.069605000000  |
| H | 2.951965000000  | 1.211772000000  | -2.560555000000 |
| H | 2.150206000000  | 3.675037000000  | 0.858060000000  |
| H | 5.233569000000  | 0.746288000000  | -1.696789000000 |
| H | 4.424327000000  | 3.206645000000  | 1.734249000000  |
| H | 5.977362000000  | 1.760638000000  | 0.445546000000  |

### 1y Int-Anti

|                                              |                             |
|----------------------------------------------|-----------------------------|
| Zero-point correction=                       | 0.543476 (Hartree/Particle) |
| Thermal correction to Energy=                | 0.580226                    |
| Thermal correction to Enthalpy=              | 0.581170                    |
| Thermal correction to Gibbs Free Energy=     | 0.472730                    |
| Sum of electronic and zero-point Energies=   | -1704.698285                |
| Sum of electronic and thermal Energies=      | -1704.661535                |
| Sum of electronic and thermal Enthalpies=    | -1704.660591                |
| Sum of electronic and thermal Free Energies= | -1704.769031                |

|   |                |                 |                |
|---|----------------|-----------------|----------------|
| C | 3.068240000000 | -2.003696000000 | 0.939408000000 |
|---|----------------|-----------------|----------------|

|    |                 |                 |                 |
|----|-----------------|-----------------|-----------------|
| C  | 4.270908000000  | -1.812965000000 | 0.333118000000  |
| C  | 1.833862000000  | -1.543561000000 | 0.344754000000  |
| H  | 5.187863000000  | -2.144691000000 | 0.802290000000  |
| C  | 4.292834000000  | -1.178458000000 | -0.941939000000 |
| C  | 1.896694000000  | -0.903440000000 | -0.954383000000 |
| H  | 0.989305000000  | -0.569660000000 | -1.444143000000 |
| C  | 3.085035000000  | -0.741216000000 | -1.579720000000 |
| H  | 3.166908000000  | -0.277361000000 | -2.555707000000 |
| H  | 3.018147000000  | -2.497221000000 | 1.905236000000  |
| C  | 0.692383000000  | -1.733822000000 | 1.064814000000  |
| C  | -0.689315000000 | -1.275038000000 | 0.708694000000  |
| C  | -0.796019000000 | 0.182726000000  | 0.303537000000  |
| N  | 0.145279000000  | 0.932045000000  | 0.733056000000  |
| O  | -0.048923000000 | 2.243984000000  | 0.361143000000  |
| Br | -1.315240000000 | -2.459066000000 | -0.834835000000 |
| C  | 1.024991000000  | 3.035792000000  | 0.879375000000  |
| H  | 0.735023000000  | 4.061433000000  | 0.636816000000  |
| H  | 1.065051000000  | 2.921414000000  | 1.967277000000  |
| O  | -1.848499000000 | 0.519858000000  | -0.410999000000 |
| Si | -2.850716000000 | 1.931631000000  | -0.343598000000 |
| C  | -4.508730000000 | 1.194702000000  | -0.869074000000 |
| C  | -2.888358000000 | 2.581706000000  | 1.408183000000  |
| H  | -2.653918000000 | 1.775718000000  | 2.110600000000  |
| H  | -2.160182000000 | 3.384990000000  | 1.547030000000  |
| H  | -3.882305000000 | 2.967357000000  | 1.658020000000  |
| C  | -2.246335000000 | 3.161461000000  | -1.614571000000 |
| H  | -1.412960000000 | 3.754294000000  | -1.229913000000 |
| H  | -1.910370000000 | 2.646280000000  | -2.520256000000 |
| H  | -3.053617000000 | 3.844892000000  | -1.899485000000 |
| C  | -4.386226000000 | 0.620626000000  | -2.287314000000 |
| H  | -3.609695000000 | -0.150903000000 | -2.341802000000 |
| H  | -5.335825000000 | 0.160869000000  | -2.592581000000 |
| H  | -4.145934000000 | 1.398789000000  | -3.020753000000 |
| C  | -5.586951000000 | 2.287407000000  | -0.854675000000 |
| H  | -5.346402000000 | 3.111083000000  | -1.536386000000 |
| H  | -6.549829000000 | 1.867468000000  | -1.174652000000 |
| H  | -5.729806000000 | 2.708141000000  | 0.147022000000  |
| C  | -4.907686000000 | 0.073085000000  | 0.098222000000  |
| H  | -4.990468000000 | 0.434834000000  | 1.129663000000  |
| H  | -5.882501000000 | -0.343395000000 | -0.189898000000 |
| H  | -4.174869000000 | -0.740676000000 | 0.089119000000  |
| O  | 5.379709000000  | -0.962620000000 | -1.620284000000 |
| C  | 6.665772000000  | -1.294335000000 | -1.060411000000 |
| H  | 6.813393000000  | -0.748771000000 | -0.125740000000 |

|   |                 |                 |                 |
|---|-----------------|-----------------|-----------------|
| H | 6.734517000000  | -2.371479000000 | -0.897104000000 |
| H | 7.391036000000  | -0.975877000000 | -1.805134000000 |
| H | 0.772083000000  | -2.280881000000 | 2.001648000000  |
| C | -1.696365000000 | -1.548034000000 | 1.837196000000  |
| O | -2.486056000000 | -0.720984000000 | 2.218099000000  |
| O | -1.568629000000 | -2.770421000000 | 2.322439000000  |
| C | -2.479841000000 | -3.114575000000 | 3.383119000000  |
| H | -3.507230000000 | -3.054145000000 | 3.020471000000  |
| H | -2.229766000000 | -4.135689000000 | 3.661640000000  |
| H | -2.341499000000 | -2.438096000000 | 4.227752000000  |
| C | 2.347858000000  | 2.680815000000  | 0.249739000000  |
| C | 3.342358000000  | 2.040030000000  | 0.990361000000  |
| C | 2.586596000000  | 2.990183000000  | -1.093261000000 |
| C | 4.575558000000  | 1.743966000000  | 0.409251000000  |
| C | 3.813508000000  | 2.689912000000  | -1.678069000000 |
| C | 4.814586000000  | 2.075551000000  | -0.923402000000 |
| H | 3.152288000000  | 1.785438000000  | 2.030077000000  |
| H | 1.808933000000  | 3.480619000000  | -1.674084000000 |
| H | 5.349410000000  | 1.259081000000  | 0.998079000000  |
| H | 3.995180000000  | 2.943167000000  | -2.718032000000 |
| H | 5.776466000000  | 1.852418000000  | -1.375773000000 |

### 1y TS-Rot

|                                              |                             |
|----------------------------------------------|-----------------------------|
| Zero-point correction=                       | 0.543543 (Hartree/Particle) |
| Thermal correction to Energy=                | 0.579371                    |
| Thermal correction to Enthalpy=              | 0.580315                    |
| Thermal correction to Gibbs Free Energy=     | 0.474301                    |
| Sum of electronic and zero-point Energies=   | -1704.685564                |
| Sum of electronic and thermal Energies=      | -1704.649736                |
| Sum of electronic and thermal Enthalpies=    | -1704.648792                |
| Sum of electronic and thermal Free Energies= | -1704.754806                |

Frequency = -15.4802

|   |                |                 |                 |
|---|----------------|-----------------|-----------------|
| C | 1.870288000000 | -3.736398000000 | -1.705677000000 |
| C | 3.171450000000 | -3.730620000000 | -2.099763000000 |
| C | 1.222683000000 | -2.554687000000 | -1.169408000000 |
| H | 3.623516000000 | -4.616814000000 | -2.525660000000 |
| C | 3.924839000000 | -2.533341000000 | -1.933352000000 |
| C | 2.042240000000 | -1.379960000000 | -0.957946000000 |
| H | 1.631672000000 | -0.516506000000 | -0.458622000000 |
| C | 3.345872000000 | -1.375548000000 | -1.325724000000 |
| H | 3.980849000000 | -0.511423000000 | -1.158639000000 |
| H | 1.277350000000 | -4.638173000000 | -1.825943000000 |

|    |                 |                 |                 |
|----|-----------------|-----------------|-----------------|
| C  | -0.105984000000 | -2.698673000000 | -0.889471000000 |
| C  | -1.183299000000 | -1.759339000000 | -0.436027000000 |
| C  | -0.967077000000 | -0.263354000000 | -0.323234000000 |
| N  | -0.321613000000 | 0.318701000000  | -1.257715000000 |
| O  | -0.332393000000 | 1.688729000000  | -1.085876000000 |
| Br | -2.660756000000 | -2.030216000000 | -1.812025000000 |
| C  | 0.548874000000  | 2.305342000000  | -2.018145000000 |
| H  | 0.374336000000  | 1.894609000000  | -3.017658000000 |
| H  | 0.246582000000  | 3.357510000000  | -2.016964000000 |
| O  | -1.587210000000 | 0.281458000000  | 0.709962000000  |
| Si | -2.334473000000 | 1.823562000000  | 0.990298000000  |
| C  | -3.492933000000 | 1.345318000000  | 2.402843000000  |
| C  | -1.061770000000 | 3.064923000000  | 1.558316000000  |
| H  | -0.366099000000 | 2.612973000000  | 2.272864000000  |
| H  | -0.485985000000 | 3.463482000000  | 0.719675000000  |
| H  | -1.558028000000 | 3.901472000000  | 2.062180000000  |
| C  | -3.283524000000 | 2.321122000000  | -0.539194000000 |
| H  | -2.656292000000 | 2.888333000000  | -1.230908000000 |
| H  | -3.661526000000 | 1.438009000000  | -1.065649000000 |
| H  | -4.146951000000 | 2.937929000000  | -0.267142000000 |
| C  | -4.203760000000 | 2.593105000000  | 2.945217000000  |
| H  | -4.909328000000 | 2.307782000000  | 3.736742000000  |
| H  | -3.497228000000 | 3.309979000000  | 3.377556000000  |
| H  | -4.777338000000 | 3.109471000000  | 2.166559000000  |
| C  | -2.680065000000 | 0.694745000000  | 3.531017000000  |
| H  | -2.125026000000 | -0.182012000000 | 3.178590000000  |
| H  | -1.957674000000 | 1.397323000000  | 3.962827000000  |
| H  | -3.347937000000 | 0.369178000000  | 4.340050000000  |
| C  | -4.541234000000 | 0.352908000000  | 1.880686000000  |
| H  | -5.174640000000 | 0.000760000000  | 2.706247000000  |
| H  | -5.197597000000 | 0.817494000000  | 1.135790000000  |
| H  | -4.075840000000 | -0.524003000000 | 1.417222000000  |
| O  | 5.170824000000  | -2.410620000000 | -2.286095000000 |
| C  | 5.867436000000  | -3.515198000000 | -2.897547000000 |
| H  | 5.369164000000  | -3.799765000000 | -3.826064000000 |
| H  | 6.867645000000  | -3.141189000000 | -3.102342000000 |
| H  | 5.910316000000  | -4.356560000000 | -2.203480000000 |
| H  | -0.466639000000 | -3.727187000000 | -0.890051000000 |
| C  | -1.598745000000 | -2.272703000000 | 0.965533000000  |
| O  | -0.751024000000 | -2.345773000000 | 1.820300000000  |
| O  | -2.863173000000 | -2.600404000000 | 1.093399000000  |
| C  | -3.252425000000 | -3.061271000000 | 2.402341000000  |
| H  | -4.315052000000 | -3.281331000000 | 2.326267000000  |
| H  | -2.688126000000 | -3.958913000000 | 2.659910000000  |

|   |                 |                 |                 |
|---|-----------------|-----------------|-----------------|
| H | -3.072122000000 | -2.280145000000 | 3.142717000000  |
| C | 1.999789000000  | 2.173394000000  | -1.620411000000 |
| C | 2.996332000000  | 2.245179000000  | -2.595601000000 |
| C | 2.363430000000  | 2.035501000000  | -0.278371000000 |
| C | 4.341450000000  | 2.203895000000  | -2.233718000000 |
| C | 3.708790000000  | 1.982607000000  | 0.083328000000  |
| C | 4.701311000000  | 2.076430000000  | -0.892436000000 |
| H | 2.716381000000  | 2.339590000000  | -3.641828000000 |
| H | 1.588319000000  | 1.967063000000  | 0.481064000000  |
| H | 5.108394000000  | 2.265960000000  | -2.999662000000 |
| H | 3.981947000000  | 1.874197000000  | 1.128542000000  |
| H | 5.748803000000  | 2.042089000000  | -0.609698000000 |

### 1y TS-Cis

|                                              |                             |
|----------------------------------------------|-----------------------------|
| Zero-point correction=                       | 0.542897 (Hartree/Particle) |
| Thermal correction to Energy=                | 0.579045                    |
| Thermal correction to Enthalpy=              | 0.579989                    |
| Thermal correction to Gibbs Free Energy=     | 0.472917                    |
| Sum of electronic and zero-point Energies=   | -1704.684359                |
| Sum of electronic and thermal Energies=      | -1704.648211                |
| Sum of electronic and thermal Enthalpies=    | -1704.647266                |
| Sum of electronic and thermal Free Energies= | -1704.754338                |

Frequency = -281.9809

|    |                 |                 |                 |
|----|-----------------|-----------------|-----------------|
| C  | 0.569175000000  | 1.444180000000  | -0.490421000000 |
| C  | -0.767932000000 | 1.227893000000  | -1.196454000000 |
| N  | 0.134176000000  | -0.605018000000 | -1.051065000000 |
| C  | 0.985805000000  | 0.010062000000  | -0.311644000000 |
| H  | -0.723997000000 | 1.440624000000  | -2.262246000000 |
| O  | 1.987769000000  | -0.398674000000 | 0.394647000000  |
| Br | 0.530739000000  | 2.485410000000  | 1.219505000000  |
| C  | -2.052224000000 | 1.144507000000  | -0.634389000000 |
| C  | -2.314631000000 | 0.791477000000  | 0.721229000000  |
| C  | -3.149955000000 | 1.331484000000  | -1.511674000000 |
| C  | -3.600761000000 | 0.675845000000  | 1.166272000000  |
| C  | -4.451037000000 | 1.226380000000  | -1.071762000000 |
| C  | -4.683426000000 | 0.887031000000  | 0.275061000000  |
| H  | -1.500173000000 | 0.569052000000  | 1.400962000000  |
| H  | -2.954528000000 | 1.575877000000  | -2.551713000000 |
| H  | -3.825415000000 | 0.387710000000  | 2.186801000000  |
| H  | -5.271036000000 | 1.385050000000  | -1.760083000000 |
| O  | 0.292119000000  | -1.940478000000 | -1.265284000000 |
| Si | 3.174723000000  | -1.640963000000 | 0.045494000000  |



|   |                 |                 |                 |
|---|-----------------|-----------------|-----------------|
| C | 3.496087000000  | -1.528695000000 | -1.786709000000 |
| H | 2.612447000000  | -1.826344000000 | -2.359179000000 |
| H | 3.772013000000  | -0.509176000000 | -2.075197000000 |
| H | 4.318672000000  | -2.195057000000 | -2.067428000000 |
| C | 2.492074000000  | -3.280379000000 | 0.611604000000  |
| H | 3.299054000000  | -4.019435000000 | 0.664242000000  |
| H | 2.052329000000  | -3.195010000000 | 1.610295000000  |
| H | 1.729308000000  | -3.656512000000 | -0.074298000000 |
| C | 4.619710000000  | -1.072386000000 | 1.107786000000  |
| C | 4.191868000000  | -1.032857000000 | 2.581615000000  |
| H | 5.030820000000  | -0.695597000000 | 3.204158000000  |
| H | 3.358771000000  | -0.339451000000 | 2.742374000000  |
| H | 3.888369000000  | -2.021473000000 | 2.943714000000  |
| C | 5.780387000000  | -2.064415000000 | 0.937164000000  |
| H | 6.117936000000  | -2.123039000000 | -0.104083000000 |
| H | 6.636669000000  | -1.741097000000 | 1.543060000000  |
| H | 5.508352000000  | -3.073993000000 | 1.264454000000  |
| C | 5.075672000000  | 0.325268000000  | 0.668687000000  |
| H | 4.268393000000  | 1.060181000000  | 0.758419000000  |
| H | 5.912025000000  | 0.658814000000  | 1.296890000000  |
| H | 5.422565000000  | 0.324467000000  | -0.371220000000 |
| C | 1.521238000000  | 2.227678000000  | -1.404115000000 |
| O | 1.129202000000  | 3.017716000000  | -2.224212000000 |
| O | 2.779783000000  | 1.915131000000  | -1.158925000000 |
| C | 3.759890000000  | 2.612402000000  | -1.951821000000 |
| H | 3.614185000000  | 2.380471000000  | -3.008026000000 |
| H | 3.670535000000  | 3.687443000000  | -1.787999000000 |
| H | 4.725180000000  | 2.249898000000  | -1.605443000000 |
| O | -5.887168000000 | 0.720216000000  | 0.800784000000  |
| C | -7.034452000000 | 0.877357000000  | -0.038911000000 |
| H | -7.086546000000 | 1.896845000000  | -0.429956000000 |
| H | -7.008083000000 | 0.158364000000  | -0.862173000000 |
| H | -7.894129000000 | 0.680365000000  | 0.598695000000  |
| C | -0.950758000000 | -2.508949000000 | -1.706149000000 |
| H | -1.290714000000 | -1.978763000000 | -2.601535000000 |
| H | -0.677853000000 | -3.530910000000 | -1.981828000000 |
| C | -2.002290000000 | -2.494967000000 | -0.626554000000 |
| C | -3.347166000000 | -2.349952000000 | -0.970830000000 |
| C | -1.649764000000 | -2.683716000000 | 0.713174000000  |
| C | -4.335248000000 | -2.425049000000 | 0.009634000000  |
| C | -2.637231000000 | -2.750672000000 | 1.693221000000  |
| C | -3.981826000000 | -2.630021000000 | 1.342353000000  |
| H | -3.619930000000 | -2.184552000000 | -2.010243000000 |
| H | -0.601073000000 | -2.784944000000 | 0.982708000000  |

|   |                 |                 |                 |
|---|-----------------|-----------------|-----------------|
| H | -5.379985000000 | -2.313604000000 | -0.266136000000 |
| H | -2.357412000000 | -2.899974000000 | 2.731515000000  |
| H | -4.750927000000 | -2.684132000000 | 2.106825000000  |

**1y TS-Trans**

|                                              |                             |
|----------------------------------------------|-----------------------------|
| Zero-point correction=                       | 0.542720 (Hartree/Particle) |
| Thermal correction to Energy=                | 0.579123                    |
| Thermal correction to Enthalpy=              | 0.580067                    |
| Thermal correction to Gibbs Free Energy=     | 0.471041                    |
| Sum of electronic and zero-point Energies=   | -1704.684588                |
| Sum of electronic and thermal Energies=      | -1704.648185                |
| Sum of electronic and thermal Enthalpies=    | -1704.647241                |
| Sum of electronic and thermal Free Energies= | -1704.756267                |

Frequency = -242.5638

|    |                 |                 |                 |
|----|-----------------|-----------------|-----------------|
| C  | -0.614811000000 | 1.312169000000  | -0.263051000000 |
| C  | 0.752615000000  | 0.937738000000  | -0.831007000000 |
| N  | -0.122482000000 | -0.814191000000 | -0.226195000000 |
| C  | -1.097809000000 | -0.054578000000 | 0.124041000000  |
| H  | 0.759471000000  | 0.724275000000  | -1.896553000000 |
| O  | -2.252920000000 | -0.311079000000 | 0.646832000000  |
| Br | -1.799878000000 | 2.003790000000  | -1.746859000000 |
| C  | 2.001717000000  | 1.148030000000  | -0.231334000000 |
| C  | 2.199506000000  | 1.373291000000  | 1.162925000000  |
| C  | 3.140879000000  | 1.029508000000  | -1.070020000000 |
| C  | 3.461854000000  | 1.503071000000  | 1.667380000000  |
| C  | 4.415873000000  | 1.174767000000  | -0.575769000000 |
| C  | 4.584143000000  | 1.402745000000  | 0.804754000000  |
| H  | 1.357539000000  | 1.390546000000  | 1.848083000000  |
| H  | 2.994692000000  | 0.833051000000  | -2.128460000000 |
| H  | 3.638917000000  | 1.655289000000  | 2.726078000000  |
| H  | 5.268275000000  | 1.090237000000  | -1.237478000000 |
| O  | -0.228433000000 | -2.150616000000 | 0.024125000000  |
| Si | -3.262830000000 | -1.738722000000 | 0.518781000000  |
| C  | -2.780381000000 | -2.913264000000 | 1.879822000000  |
| H  | -2.942516000000 | -2.469739000000 | 2.866781000000  |
| H  | -3.388062000000 | -3.822205000000 | 1.812733000000  |
| H  | -1.729449000000 | -3.201552000000 | 1.795407000000  |
| C  | -3.046306000000 | -2.426080000000 | -1.204013000000 |
| H  | -3.984860000000 | -2.875624000000 | -1.546096000000 |
| H  | -2.781368000000 | -1.638334000000 | -1.918260000000 |
| H  | -2.269090000000 | -3.193865000000 | -1.234520000000 |
| C  | -4.963794000000 | -0.978623000000 | 0.783554000000  |

|   |                 |                 |                 |
|---|-----------------|-----------------|-----------------|
| C | -5.319661000000 | -0.085884000000 | -0.412803000000 |
| H | -6.306953000000 | 0.369284000000  | -0.260608000000 |
| H | -4.594662000000 | 0.726462000000  | -0.537729000000 |
| H | -5.357234000000 | -0.654130000000 | -1.348986000000 |
| C | -5.993016000000 | -2.112345000000 | 0.905672000000  |
| H | -6.006303000000 | -2.753873000000 | 0.016511000000  |
| H | -5.797089000000 | -2.745144000000 | 1.778488000000  |
| H | -6.999905000000 | -1.690926000000 | 1.021487000000  |
| C | -4.975108000000 | -0.137451000000 | 2.067363000000  |
| H | -4.734894000000 | -0.738922000000 | 2.951248000000  |
| H | -4.259219000000 | 0.689731000000  | 2.012852000000  |
| H | -5.973526000000 | 0.292099000000  | 2.221755000000  |
| C | -0.617316000000 | 2.431840000000  | 0.780900000000  |
| O | -0.017011000000 | 3.462579000000  | 0.623082000000  |
| O | -1.362676000000 | 2.112086000000  | 1.822436000000  |
| C | -1.456351000000 | 3.123534000000  | 2.845082000000  |
| H | -1.886973000000 | 4.033601000000  | 2.424828000000  |
| H | -2.107639000000 | 2.704198000000  | 3.608419000000  |
| H | -0.465556000000 | 3.332203000000  | 3.252178000000  |
| O | 5.762006000000  | 1.517156000000  | 1.394881000000  |
| C | 6.948104000000  | 1.412962000000  | 0.600022000000  |
| H | 7.777147000000  | 1.523558000000  | 1.296175000000  |
| H | 6.997196000000  | 0.435867000000  | 0.112631000000  |
| H | 6.978857000000  | 2.210415000000  | -0.147124000000 |
| C | 0.702585000000  | -2.872426000000 | -0.792950000000 |
| H | 0.465389000000  | -3.919179000000 | -0.582983000000 |
| H | 0.493565000000  | -2.669201000000 | -1.848360000000 |
| C | 2.137912000000  | -2.559455000000 | -0.447567000000 |
| C | 3.131089000000  | -2.746334000000 | -1.411785000000 |
| C | 2.496109000000  | -2.138809000000 | 0.835470000000  |
| C | 4.471121000000  | -2.540968000000 | -1.090397000000 |
| C | 3.835991000000  | -1.926613000000 | 1.153570000000  |
| C | 4.826749000000  | -2.134254000000 | 0.194934000000  |
| H | 2.852460000000  | -3.060090000000 | -2.414634000000 |
| H | 1.725253000000  | -1.980357000000 | 1.584834000000  |
| H | 5.236184000000  | -2.692236000000 | -1.845623000000 |
| H | 4.106982000000  | -1.597425000000 | 2.152511000000  |
| H | 5.870628000000  | -1.973145000000 | 0.447517000000  |

### 1y Int-Cis

|                                          |                             |
|------------------------------------------|-----------------------------|
| Zero-point correction=                   | 0.544849 (Hartree/Particle) |
| Thermal correction to Energy=            | 0.581008                    |
| Thermal correction to Enthalpy=          | 0.581952                    |
| Thermal correction to Gibbs Free Energy= | 0.475462                    |

Sum of electronic and zero-point Energies= -1704.705682  
 Sum of electronic and thermal Energies= -1704.669523  
 Sum of electronic and thermal Enthalpies= -1704.668579  
 Sum of electronic and thermal Free Energies= -1704.775069

|    |                 |                 |                 |
|----|-----------------|-----------------|-----------------|
| C  | -0.442496000000 | 1.094004000000  | -0.978419000000 |
| C  | 0.792989000000  | 0.195817000000  | -0.539052000000 |
| N  | -0.245092000000 | -0.536295000000 | 0.263502000000  |
| C  | -1.251485000000 | 0.247468000000  | -0.026385000000 |
| O  | -2.441662000000 | 0.320225000000  | 0.378584000000  |
| Br | -1.040708000000 | 0.980254000000  | -2.846262000000 |
| C  | 1.584759000000  | -0.596578000000 | -1.516729000000 |
| C  | 2.941684000000  | -0.296794000000 | -1.676358000000 |
| C  | 1.033110000000  | -1.658013000000 | -2.233285000000 |
| C  | 3.732358000000  | -1.047882000000 | -2.529244000000 |
| C  | 1.815911000000  | -2.428279000000 | -3.084810000000 |
| C  | 3.176846000000  | -2.129199000000 | -3.226743000000 |
| H  | 3.382352000000  | 0.521953000000  | -1.114221000000 |
| H  | -0.014167000000 | -1.922365000000 | -2.105413000000 |
| H  | 4.788522000000  | -0.833689000000 | -2.652509000000 |
| H  | 1.367758000000  | -3.262537000000 | -3.610196000000 |
| O  | -0.145033000000 | -1.414506000000 | 1.281746000000  |
| Si | -3.103634000000 | 0.590793000000  | 2.031423000000  |
| C  | -1.651610000000 | 0.550266000000  | 3.190571000000  |
| H  | -0.810915000000 | 1.126021000000  | 2.789738000000  |
| H  | -1.953904000000 | 1.024710000000  | 4.131111000000  |
| H  | -1.315160000000 | -0.465739000000 | 3.409798000000  |
| C  | -3.889099000000 | 2.263822000000  | 1.866248000000  |
| H  | -4.484371000000 | 2.489056000000  | 2.757713000000  |
| H  | -3.124178000000 | 3.038100000000  | 1.759762000000  |
| H  | -4.549705000000 | 2.303540000000  | 0.995238000000  |
| C  | -4.319721000000 | -0.819552000000 | 2.244000000000  |
| C  | -5.513176000000 | -0.639613000000 | 1.296338000000  |
| H  | -5.200668000000 | -0.615260000000 | 0.246103000000  |
| H  | -6.210036000000 | -1.478728000000 | 1.416026000000  |
| H  | -6.063411000000 | 0.282842000000  | 1.509880000000  |
| C  | -3.630237000000 | -2.160267000000 | 1.962957000000  |
| H  | -4.331541000000 | -2.983725000000 | 2.147926000000  |
| H  | -3.302404000000 | -2.234140000000 | 0.920068000000  |
| H  | -2.760693000000 | -2.315224000000 | 2.611954000000  |
| C  | -4.806524000000 | -0.786890000000 | 3.702478000000  |
| H  | -5.292712000000 | 0.163439000000  | 3.951688000000  |
| H  | -5.542493000000 | -1.584839000000 | 3.862088000000  |
| H  | -3.984640000000 | -0.947174000000 | 4.409285000000  |

|   |                 |                 |                 |
|---|-----------------|-----------------|-----------------|
| C | -0.337223000000 | -2.801838000000 | 0.884819000000  |
| H | -0.678926000000 | -3.264091000000 | 1.814740000000  |
| H | -1.147254000000 | -2.851565000000 | 0.151358000000  |
| O | 4.028052000000  | -2.833893000000 | -4.000410000000 |
| C | 3.516641000000  | -3.977232000000 | -4.671429000000 |
| H | 3.115848000000  | -4.705505000000 | -3.957714000000 |
| H | 2.736575000000  | -3.700248000000 | -5.388227000000 |
| H | 4.359705000000  | -4.416061000000 | -5.204220000000 |
| C | 0.916696000000  | -3.461729000000 | 0.375722000000  |
| C | 2.185774000000  | -2.950513000000 | 0.645712000000  |
| C | 0.787665000000  | -4.633604000000 | -0.372917000000 |
| C | 3.316776000000  | -3.591975000000 | 0.143736000000  |
| C | 1.919256000000  | -5.285907000000 | -0.855432000000 |
| C | 3.186968000000  | -4.760181000000 | -0.606402000000 |
| H | 2.290333000000  | -2.037800000000 | 1.225679000000  |
| H | -0.202640000000 | -5.028652000000 | -0.585554000000 |
| H | 4.300869000000  | -3.176749000000 | 0.338685000000  |
| H | 1.810949000000  | -6.195179000000 | -1.438774000000 |
| H | 4.069609000000  | -5.257073000000 | -0.997344000000 |
| H | 1.440254000000  | 0.759170000000  | 0.138703000000  |
| C | -0.356485000000 | 2.519187000000  | -0.446994000000 |
| O | -0.661218000000 | 2.749530000000  | 0.702130000000  |
| O | 0.107647000000  | 3.379877000000  | -1.317903000000 |
| C | 0.258804000000  | 4.731826000000  | -0.835211000000 |
| H | -0.710425000000 | 5.119339000000  | -0.518627000000 |
| H | 0.962009000000  | 4.749185000000  | -0.001491000000 |
| H | 0.644747000000  | 5.297679000000  | -1.679560000000 |

### 1y Int-Trans

|                                              |                             |
|----------------------------------------------|-----------------------------|
| Zero-point correction=                       | 0.545269 (Hartree/Particle) |
| Thermal correction to Energy=                | 0.581390                    |
| Thermal correction to Enthalpy=              | 0.582334                    |
| Thermal correction to Gibbs Free Energy=     | 0.475293                    |
| Sum of electronic and zero-point Energies=   | -1704.710277                |
| Sum of electronic and thermal Energies=      | -1704.674156                |
| Sum of electronic and thermal Enthalpies=    | -1704.673212                |
| Sum of electronic and thermal Free Energies= | -1704.780253                |

|    |                 |                 |                 |
|----|-----------------|-----------------|-----------------|
| C  | -0.153826000000 | 1.361531000000  | -0.736397000000 |
| C  | 0.961311000000  | 0.422602000000  | -0.123515000000 |
| N  | -0.178895000000 | -0.106091000000 | 0.687515000000  |
| C  | -1.111065000000 | 0.665272000000  | 0.194478000000  |
| O  | -2.344040000000 | 0.810251000000  | 0.408040000000  |
| Br | -0.584600000000 | 1.064954000000  | -2.640769000000 |

|    |                 |                 |                 |
|----|-----------------|-----------------|-----------------|
| C  | 2.067822000000  | 1.045271000000  | 0.660477000000  |
| C  | 1.838996000000  | 1.656445000000  | 1.901755000000  |
| C  | 3.356966000000  | 1.023172000000  | 0.135087000000  |
| C  | 2.888246000000  | 2.230441000000  | 2.596760000000  |
| C  | 4.419251000000  | 1.607023000000  | 0.820582000000  |
| C  | 4.185043000000  | 2.211554000000  | 2.059723000000  |
| H  | 0.845025000000  | 1.666209000000  | 2.342921000000  |
| H  | 3.539417000000  | 0.537927000000  | -0.820005000000 |
| H  | 2.732314000000  | 2.694871000000  | 3.564560000000  |
| H  | 5.413462000000  | 1.572529000000  | 0.392311000000  |
| O  | -0.251362000000 | -0.944113000000 | 1.737674000000  |
| Si | -3.311955000000 | 0.594143000000  | 1.909099000000  |
| C  | -2.170923000000 | 1.183589000000  | 3.253505000000  |
| H  | -1.782032000000 | 2.177232000000  | 3.007660000000  |
| H  | -2.733415000000 | 1.268435000000  | 4.190102000000  |
| H  | -1.333524000000 | 0.502247000000  | 3.426993000000  |
| C  | -4.686696000000 | 1.783210000000  | 1.539212000000  |
| H  | -5.410946000000 | 1.801967000000  | 2.359542000000  |
| H  | -4.284534000000 | 2.793295000000  | 1.414324000000  |
| H  | -5.216731000000 | 1.505583000000  | 0.623037000000  |
| C  | -3.835220000000 | -1.223800000000 | 1.991724000000  |
| C  | -3.460666000000 | -1.952671000000 | 0.692865000000  |
| H  | -2.376428000000 | -1.981780000000 | 0.535390000000  |
| H  | -3.812509000000 | -2.990544000000 | 0.742617000000  |
| H  | -3.917979000000 | -1.486589000000 | -0.186827000000 |
| C  | -3.166853000000 | -1.917274000000 | 3.188306000000  |
| H  | -3.492262000000 | -2.964104000000 | 3.232886000000  |
| H  | -2.075493000000 | -1.907756000000 | 3.111937000000  |
| H  | -3.441844000000 | -1.442545000000 | 4.136599000000  |
| C  | -5.361506000000 | -1.283546000000 | 2.176303000000  |
| H  | -5.894432000000 | -0.836699000000 | 1.330876000000  |
| H  | -5.675831000000 | -2.331701000000 | 2.254582000000  |
| H  | -5.684069000000 | -0.772761000000 | 3.090488000000  |
| C  | 0.331444000000  | -2.252394000000 | 1.433223000000  |
| H  | -0.067879000000 | -2.871777000000 | 2.239568000000  |
| H  | -0.063822000000 | -2.598428000000 | 0.474625000000  |
| O  | 5.140311000000  | 2.792983000000  | 2.814028000000  |
| C  | 6.471956000000  | 2.777340000000  | 2.319160000000  |
| H  | 6.832040000000  | 1.751177000000  | 2.188730000000  |
| H  | 6.546797000000  | 3.314580000000  | 1.367738000000  |
| H  | 7.078280000000  | 3.282729000000  | 3.070205000000  |
| C  | 1.833146000000  | -2.193267000000 | 1.449618000000  |
| C  | 2.494308000000  | -1.686695000000 | 2.573617000000  |
| C  | 2.571188000000  | -2.624483000000 | 0.348000000000  |

|   |                 |                 |                 |
|---|-----------------|-----------------|-----------------|
| C | 3.882384000000  | -1.605757000000 | 2.589291000000  |
| C | 3.964568000000  | -2.554880000000 | 0.368398000000  |
| C | 4.618938000000  | -2.042734000000 | 1.485932000000  |
| H | 1.915773000000  | -1.343869000000 | 3.427777000000  |
| H | 2.053933000000  | -3.011599000000 | -0.526218000000 |
| H | 4.391671000000  | -1.202419000000 | 3.459095000000  |
| H | 4.535008000000  | -2.892374000000 | -0.491077000000 |
| H | 5.702656000000  | -1.978131000000 | 1.498433000000  |
| H | 1.318030000000  | -0.322804000000 | -0.836762000000 |
| C | 0.028303000000  | 2.832137000000  | -0.393877000000 |
| O | -0.586386000000 | 3.349754000000  | 0.507096000000  |
| O | 0.951389000000  | 3.393939000000  | -1.141000000000 |
| C | 1.292408000000  | 4.748954000000  | -0.786079000000 |
| H | 0.413126000000  | 5.388961000000  | -0.869799000000 |
| H | 1.679134000000  | 4.771069000000  | 0.234660000000  |
| H | 2.058666000000  | 5.050679000000  | -1.496079000000 |

#### Br<sub>2</sub> with 2 HFIP

|                                              |                             |
|----------------------------------------------|-----------------------------|
| Zero-point correction=                       | 0.130886 (Hartree/Particle) |
| Thermal correction to Energy=                | 0.155061                    |
| Thermal correction to Enthalpy=              | 0.156005                    |
| Thermal correction to Gibbs Free Energy=     | 0.069030                    |
| Sum of electronic and zero-point Energies=   | -1605.179315                |
| Sum of electronic and thermal Energies=      | -1605.155140                |
| Sum of electronic and thermal Enthalpies=    | -1605.154196                |
| Sum of electronic and thermal Free Energies= | -1605.241171                |

|   |                 |                 |                 |
|---|-----------------|-----------------|-----------------|
| C | 0.260215000000  | -0.302466000000 | -0.463167000000 |
| H | -0.348732000000 | -1.204767000000 | -0.350243000000 |
| C | -0.347171000000 | 0.554468000000  | -1.565875000000 |
| F | 0.458836000000  | 1.578550000000  | -1.869345000000 |
| F | -0.514099000000 | -0.173360000000 | -2.670842000000 |
| F | -1.532381000000 | 1.046948000000  | -1.206079000000 |
| C | 0.292861000000  | 0.423851000000  | 0.879778000000  |
| F | 0.896428000000  | -0.346961000000 | 1.789219000000  |
| F | 0.972120000000  | 1.573141000000  | 0.796743000000  |
| F | -0.936211000000 | 0.697322000000  | 1.320266000000  |
| O | 1.574352000000  | -0.581005000000 | -0.878627000000 |
| H | 1.928737000000  | -1.332056000000 | -0.376196000000 |
| C | 4.390421000000  | 1.583851000000  | -0.462745000000 |
| H | 4.925342000000  | 0.677055000000  | -0.773300000000 |
| C | 4.193232000000  | 1.504174000000  | 1.046373000000  |
| F | 3.578852000000  | 2.587660000000  | 1.527701000000  |
| F | 3.424659000000  | 0.442512000000  | 1.331029000000  |

|    |                |                 |                 |
|----|----------------|-----------------|-----------------|
| F  | 5.349833000000 | 1.358100000000  | 1.700338000000  |
| C  | 5.239653000000 | 2.777774000000  | -0.866849000000 |
| F  | 5.429335000000 | 2.775617000000  | -2.188892000000 |
| F  | 4.650262000000 | 3.932920000000  | -0.543048000000 |
| F  | 6.438605000000 | 2.746667000000  | -0.276225000000 |
| O  | 3.156237000000 | 1.757254000000  | -1.086397000000 |
| H  | 2.643898000000 | 0.931836000000  | -1.013789000000 |
| Br | 2.557622000000 | -0.950883000000 | -3.526020000000 |
| Br | 3.691514000000 | -1.279436000000 | -5.716329000000 |

**Br with 1 HFIP**

|                                              |                             |
|----------------------------------------------|-----------------------------|
| Zero-point correction=                       | 0.064092 (Hartree/Particle) |
| Thermal correction to Energy=                | 0.075126                    |
| Thermal correction to Enthalpy=              | 0.076071                    |
| Thermal correction to Gibbs Free Energy=     | 0.023271                    |
| Sum of electronic and zero-point Energies=   | -802.773377                 |
| Sum of electronic and thermal Energies=      | -802.762343                 |
| Sum of electronic and thermal Enthalpies=    | -802.761398                 |
| Sum of electronic and thermal Free Energies= | -802.814198                 |

|    |                |                 |                 |
|----|----------------|-----------------|-----------------|
| C  | 4.319987000000 | 1.677138000000  | -0.283701000000 |
| H  | 4.326355000000 | 0.799157000000  | -0.943247000000 |
| C  | 5.018512000000 | 1.296525000000  | 1.011401000000  |
| F  | 5.043032000000 | 2.316103000000  | 1.880098000000  |
| F  | 4.369529000000 | 0.285790000000  | 1.598482000000  |
| F  | 6.284041000000 | 0.907578000000  | 0.807972000000  |
| C  | 5.035113000000 | 2.808207000000  | -1.006868000000 |
| F  | 4.405636000000 | 3.083647000000  | -2.153568000000 |
| F  | 5.050829000000 | 3.932107000000  | -0.277911000000 |
| F  | 6.305112000000 | 2.498639000000  | -1.300973000000 |
| O  | 3.028826000000 | 2.095405000000  | 0.023502000000  |
| H  | 2.419758000000 | 1.500923000000  | -0.496143000000 |
| Br | 1.637713000000 | -0.037232000000 | -1.805126000000 |

**1a with 1 HFIP**

|                                              |                             |
|----------------------------------------------|-----------------------------|
| Zero-point correction=                       | 0.451228 (Hartree/Particle) |
| Thermal correction to Energy=                | 0.487043                    |
| Thermal correction to Enthalpy=              | 0.487987                    |
| Thermal correction to Gibbs Free Energy=     | 0.382895                    |
| Sum of electronic and zero-point Energies=   | -1921.098964                |
| Sum of electronic and thermal Energies=      | -1921.063150                |
| Sum of electronic and thermal Enthalpies=    | -1921.062206                |
| Sum of electronic and thermal Free Energies= | -1921.167298                |



|    |                 |                 |                 |
|----|-----------------|-----------------|-----------------|
| C  | 1.947668000000  | 0.055189000000  | -0.754194000000 |
| C  | 1.146824000000  | -0.709728000000 | 0.220868000000  |
| H  | 1.692358000000  | -1.369141000000 | 0.889409000000  |
| H  | 1.392631000000  | 0.801989000000  | -1.319395000000 |
| C  | 3.294947000000  | -0.114839000000 | -1.033775000000 |
| C  | 4.118172000000  | -1.068375000000 | -0.362869000000 |
| C  | 3.867635000000  | 0.763541000000  | -2.002714000000 |
| C  | 5.456804000000  | -1.137885000000 | -0.670168000000 |
| C  | 5.212465000000  | 0.688511000000  | -2.289446000000 |
| C  | 5.998052000000  | -0.262807000000 | -1.626556000000 |
| H  | 3.696108000000  | -1.738586000000 | 0.378006000000  |
| H  | 3.226815000000  | 1.490509000000  | -2.493539000000 |
| H  | 6.096692000000  | -1.859176000000 | -0.175562000000 |
| H  | 5.661175000000  | 1.353757000000  | -3.017686000000 |
| H  | 7.057704000000  | -0.325627000000 | -1.855883000000 |
| C  | 0.148415000000  | 0.108443000000  | 0.968178000000  |
| N  | 0.056334000000  | -0.168102000000 | 2.213516000000  |
| O  | -0.874873000000 | 0.636817000000  | 2.825137000000  |
| C  | -0.922684000000 | 0.349911000000  | 4.218056000000  |
| H  | -1.234267000000 | -0.685087000000 | 4.385199000000  |
| H  | 0.052142000000  | 0.526906000000  | 4.679699000000  |
| H  | -1.663765000000 | 1.033589000000  | 4.634276000000  |
| O  | -0.515090000000 | 0.999679000000  | 0.254394000000  |
| Si | -1.680072000000 | 2.228422000000  | 0.618720000000  |
| C  | -0.978241000000 | 3.448090000000  | 1.850907000000  |
| H  | -1.291173000000 | 4.469290000000  | 1.609222000000  |
| H  | -1.300302000000 | 3.219121000000  | 2.869950000000  |
| H  | 0.115749000000  | 3.415571000000  | 1.828540000000  |
| C  | -1.816636000000 | 3.020530000000  | -1.092391000000 |
| C  | -3.288841000000 | 1.422301000000  | 1.119088000000  |
| H  | -3.404127000000 | 0.456736000000  | 0.615246000000  |
| H  | -3.332264000000 | 1.250001000000  | 2.197387000000  |
| H  | -4.140215000000 | 2.050225000000  | 0.835592000000  |
| C  | -0.450916000000 | 3.582074000000  | -1.510614000000 |
| H  | -0.084652000000 | 4.333226000000  | -0.798792000000 |
| H  | 0.301760000000  | 2.788687000000  | -1.594245000000 |
| H  | -0.522116000000 | 4.069627000000  | -2.491983000000 |
| C  | -2.273520000000 | 1.973839000000  | -2.117038000000 |
| H  | -2.341638000000 | 2.423984000000  | -3.116479000000 |
| H  | -1.572956000000 | 1.133102000000  | -2.176695000000 |
| H  | -3.262601000000 | 1.571454000000  | -1.869064000000 |
| C  | -2.837911000000 | 4.166056000000  | -1.050469000000 |
| H  | -2.920579000000 | 4.630468000000  | -2.042038000000 |
| H  | -3.837142000000 | 3.814370000000  | -0.770243000000 |

|    |                 |                 |                 |
|----|-----------------|-----------------|-----------------|
| H  | -2.546055000000 | 4.952083000000  | -0.344822000000 |
| Br | 0.149823000000  | -1.942021000000 | -1.086144000000 |
| C  | 3.009997000000  | 2.768776000000  | 1.521840000000  |
| H  | 2.767847000000  | 3.751201000000  | 1.940752000000  |
| C  | 4.424142000000  | 2.843504000000  | 0.945572000000  |
| F  | 4.948151000000  | 1.627208000000  | 0.735116000000  |
| F  | 4.404016000000  | 3.483054000000  | -0.226568000000 |
| F  | 5.246867000000  | 3.498774000000  | 1.768246000000  |
| C  | 2.926001000000  | 1.745763000000  | 2.644635000000  |
| F  | 1.757851000000  | 1.852815000000  | 3.281380000000  |
| F  | 3.020620000000  | 0.495895000000  | 2.169377000000  |
| F  | 3.908313000000  | 1.921510000000  | 3.532580000000  |
| O  | 2.106532000000  | 2.351408000000  | 0.542657000000  |
| H  | 1.738228000000  | 3.123830000000  | 0.088315000000  |

## 20. Spectroscopic Data:

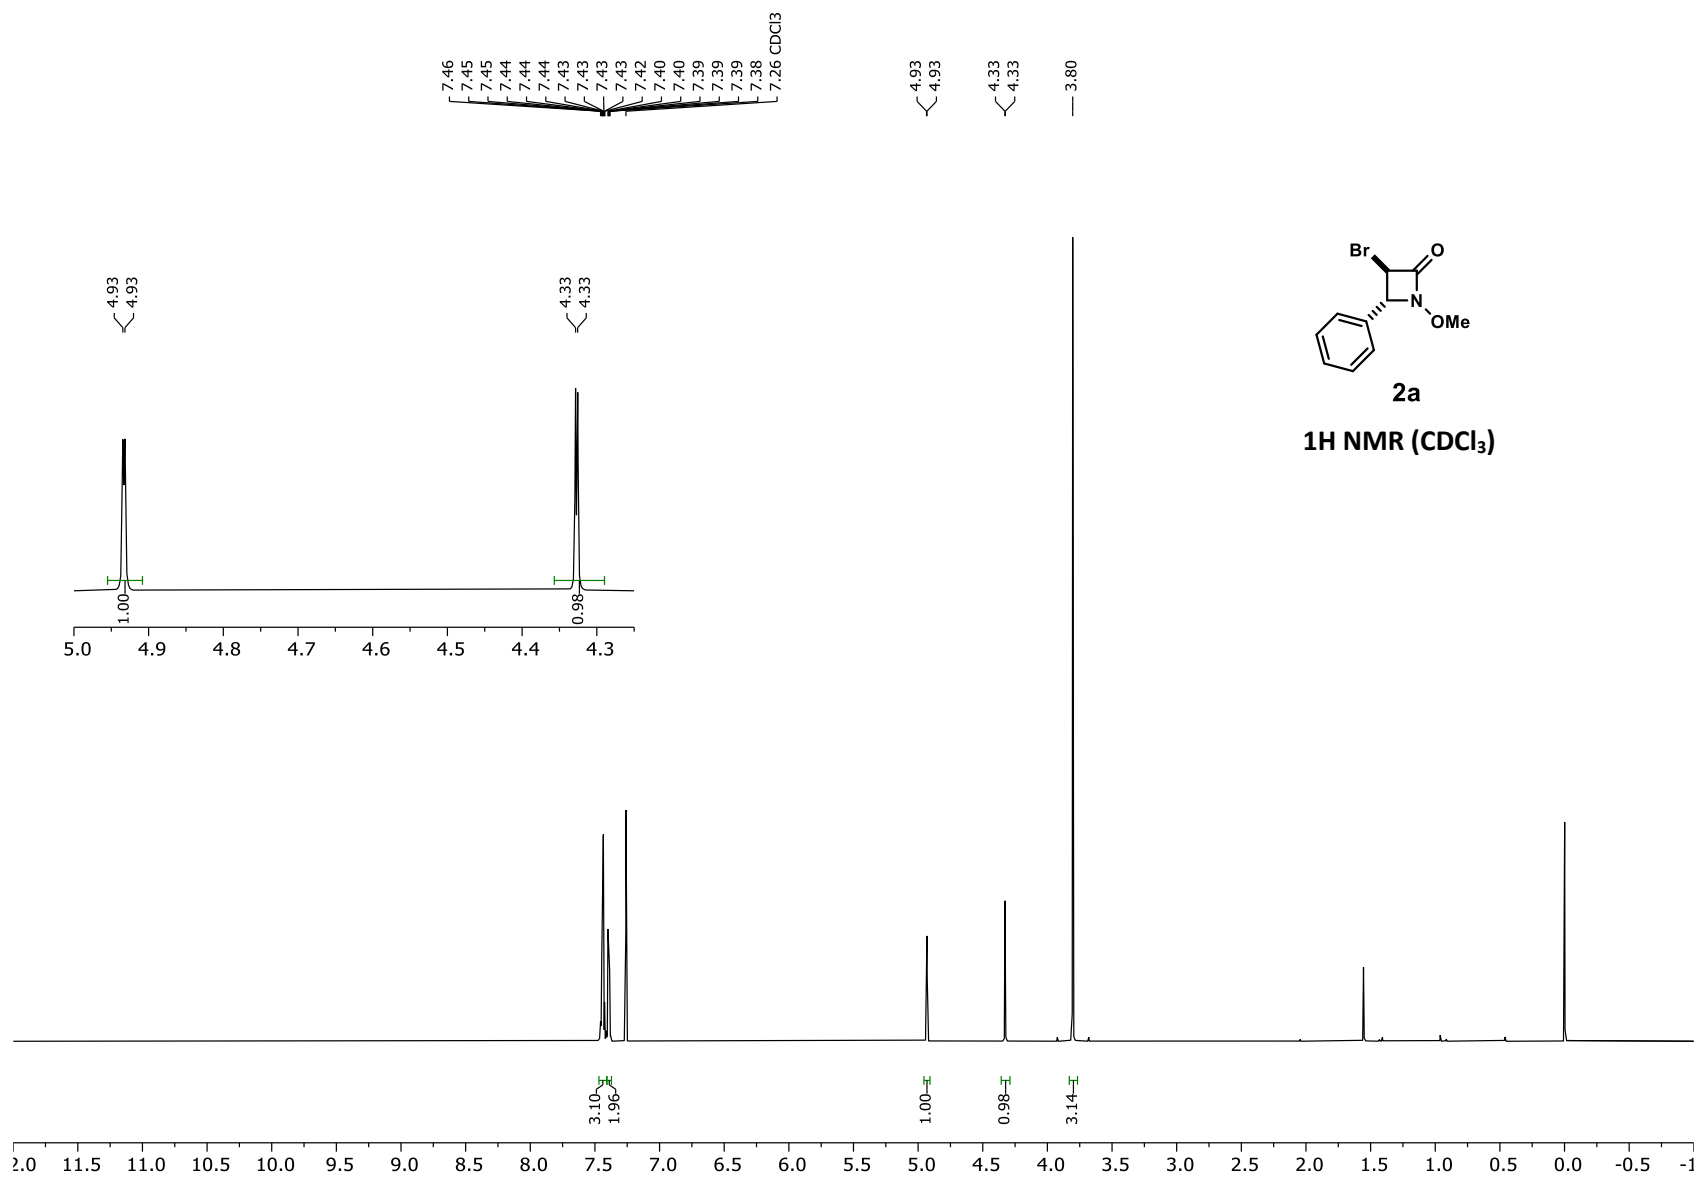

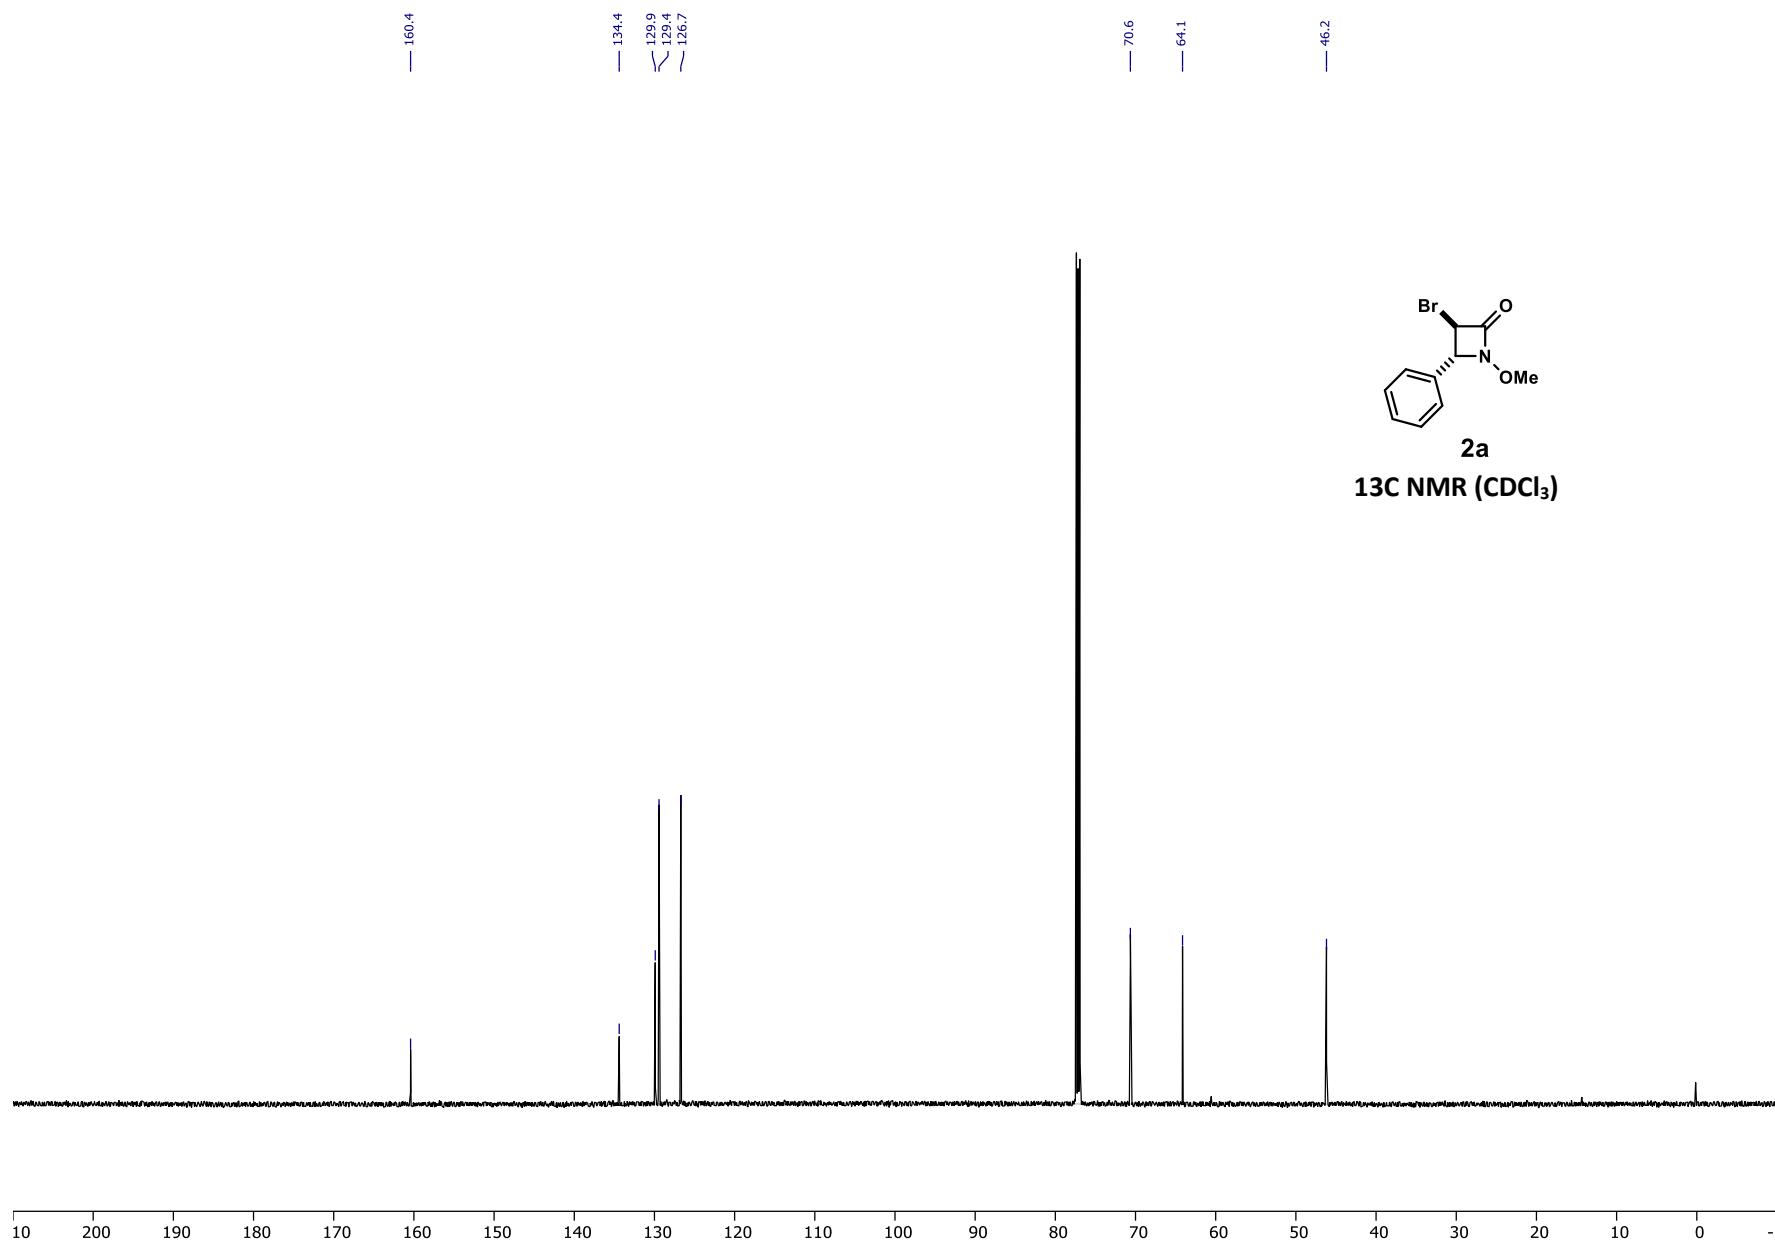

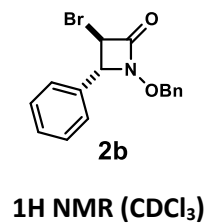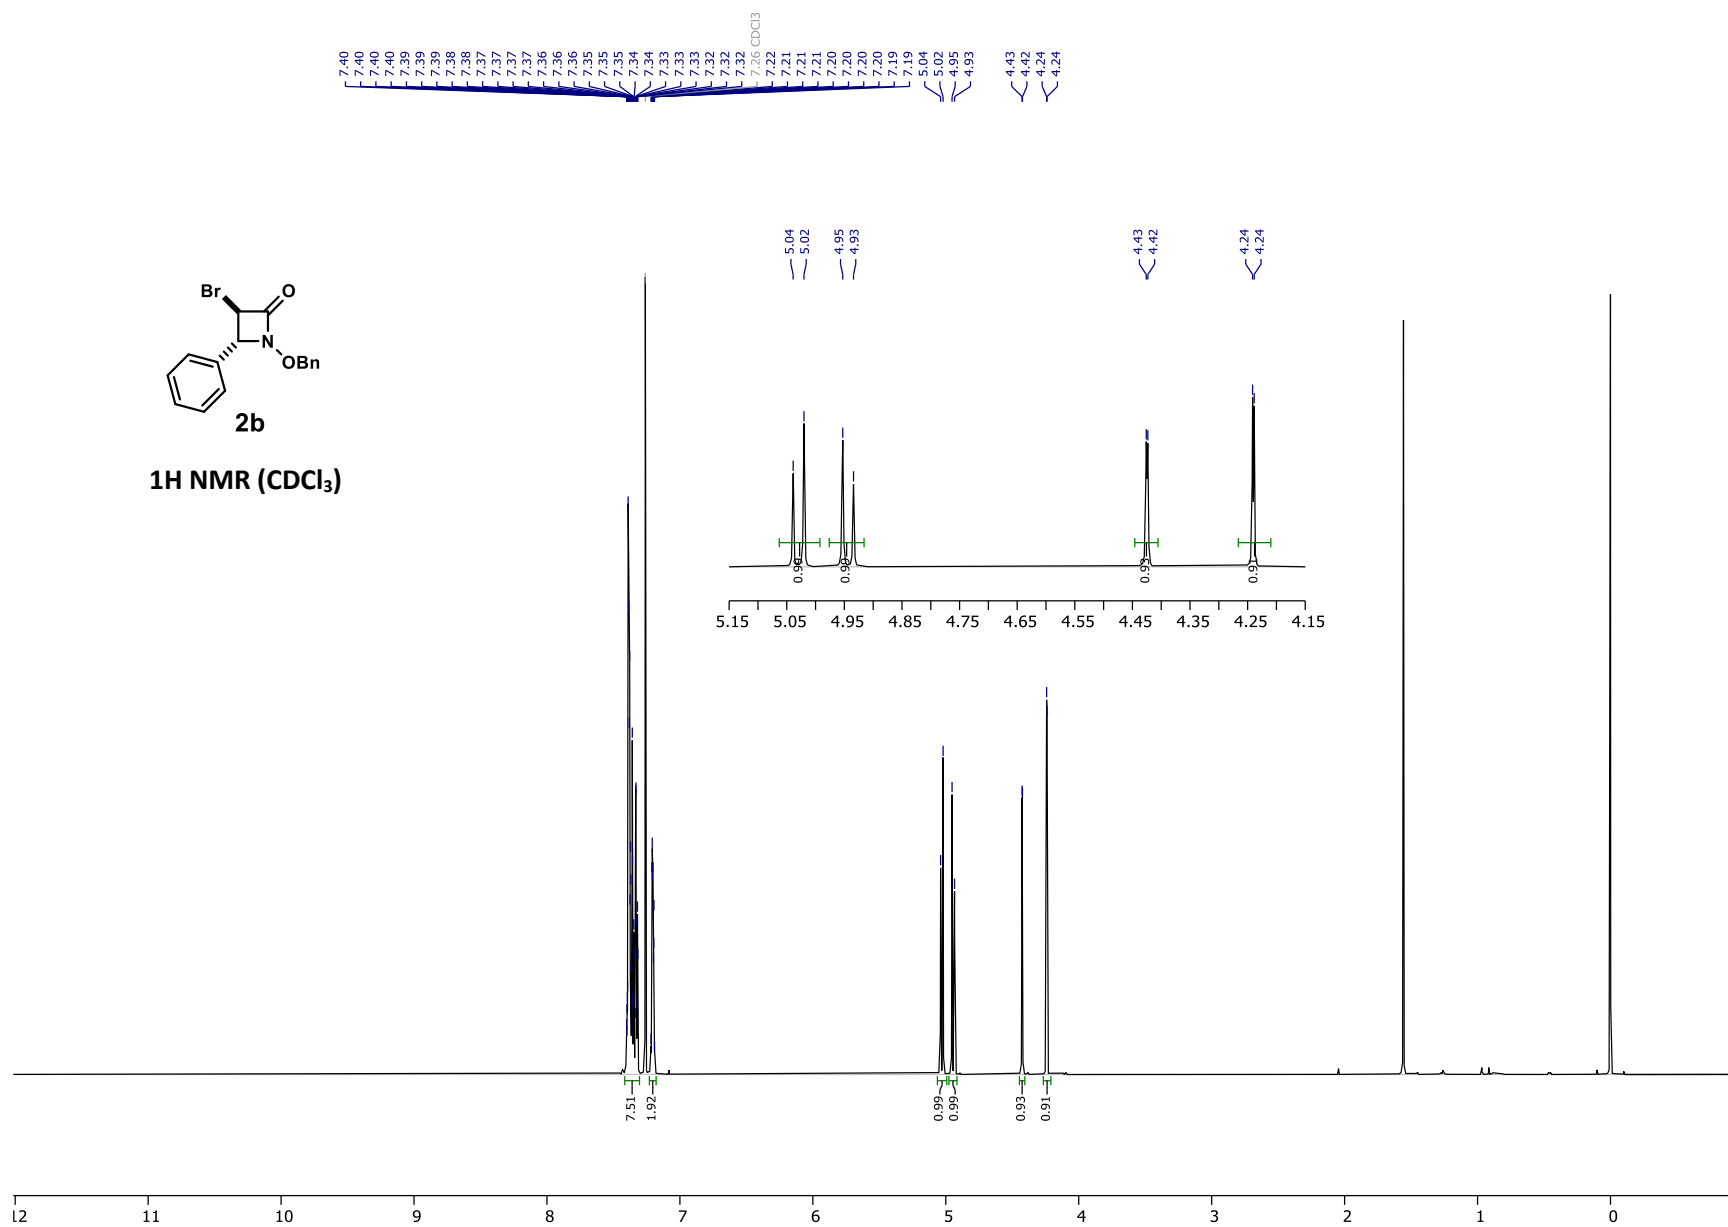

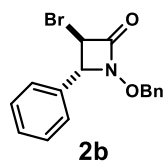

**<sup>13</sup>C NMR (CDCl<sub>3</sub>)**

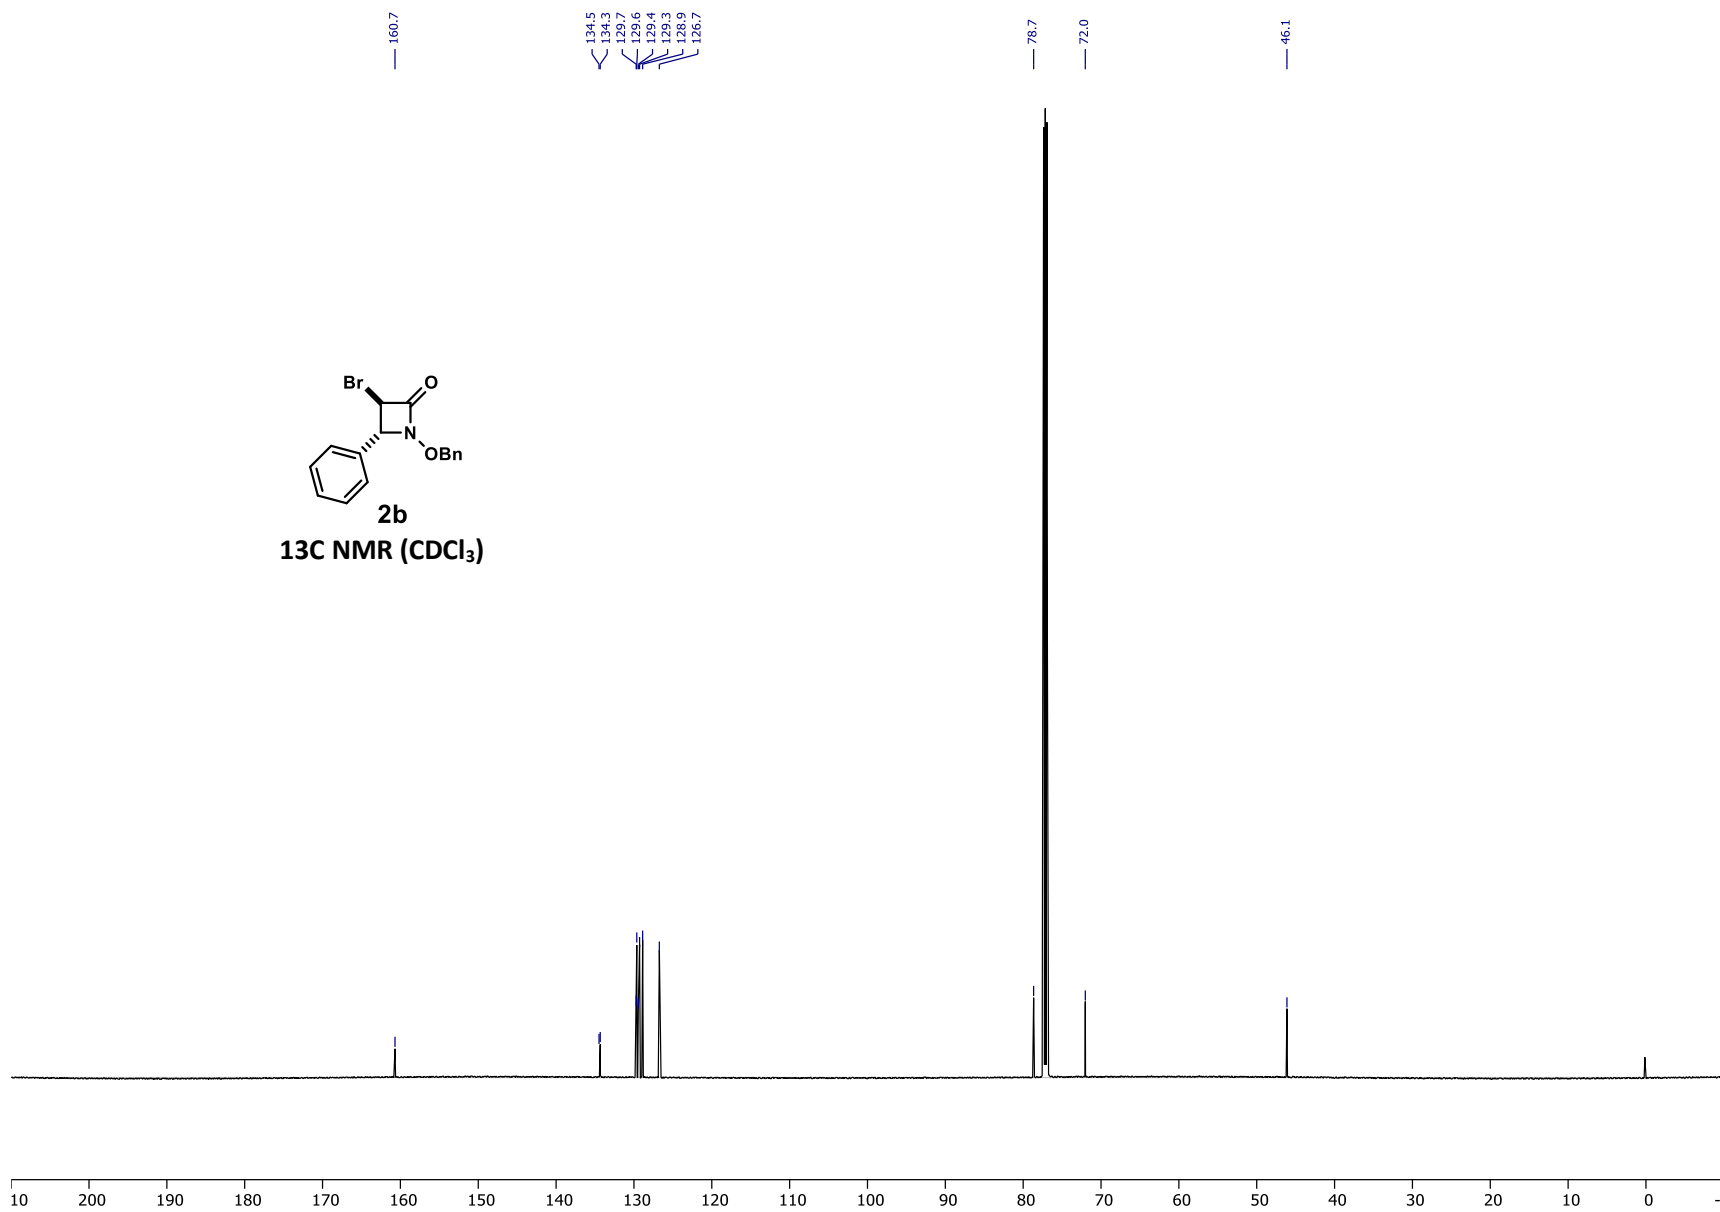

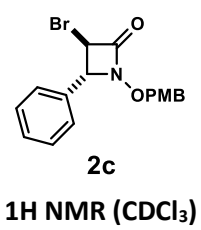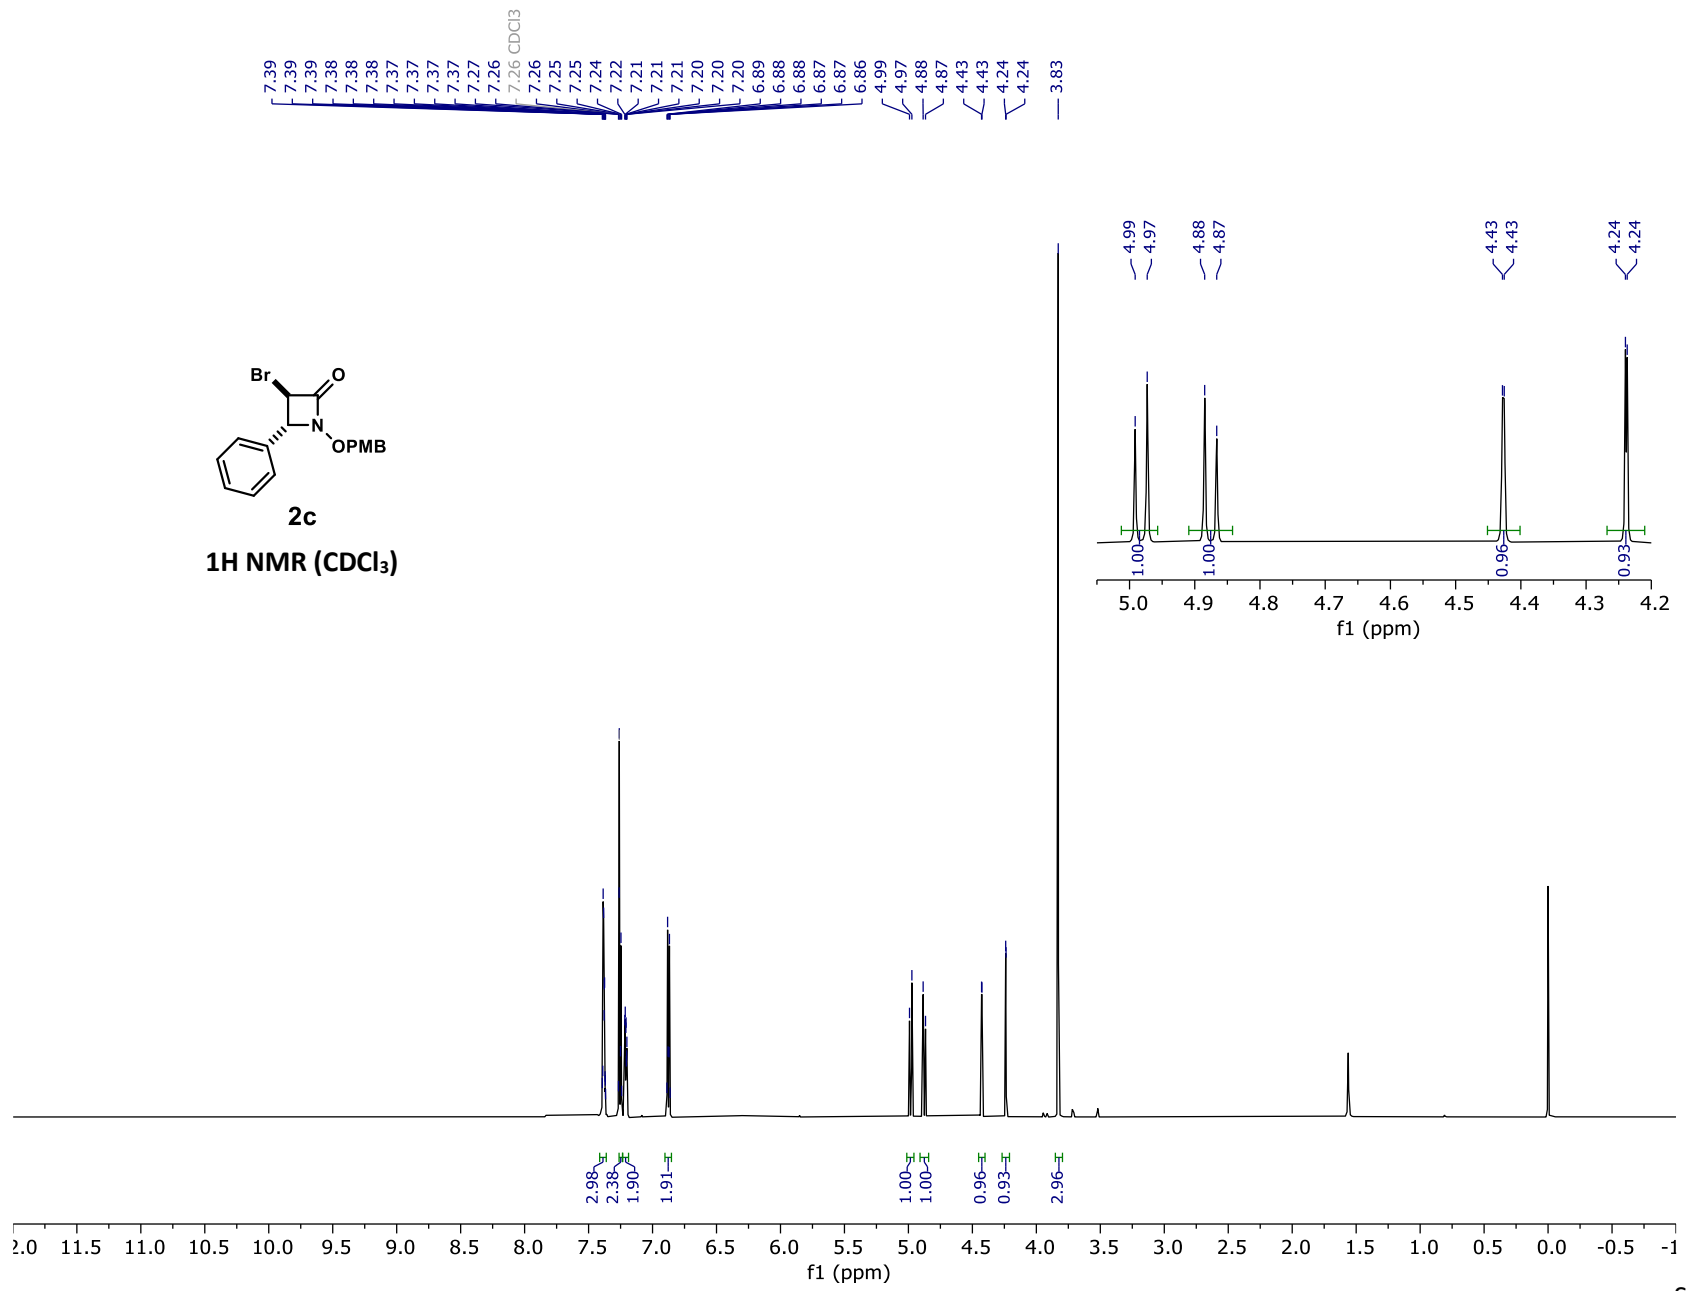

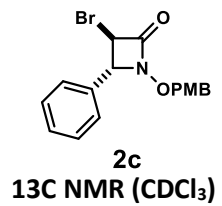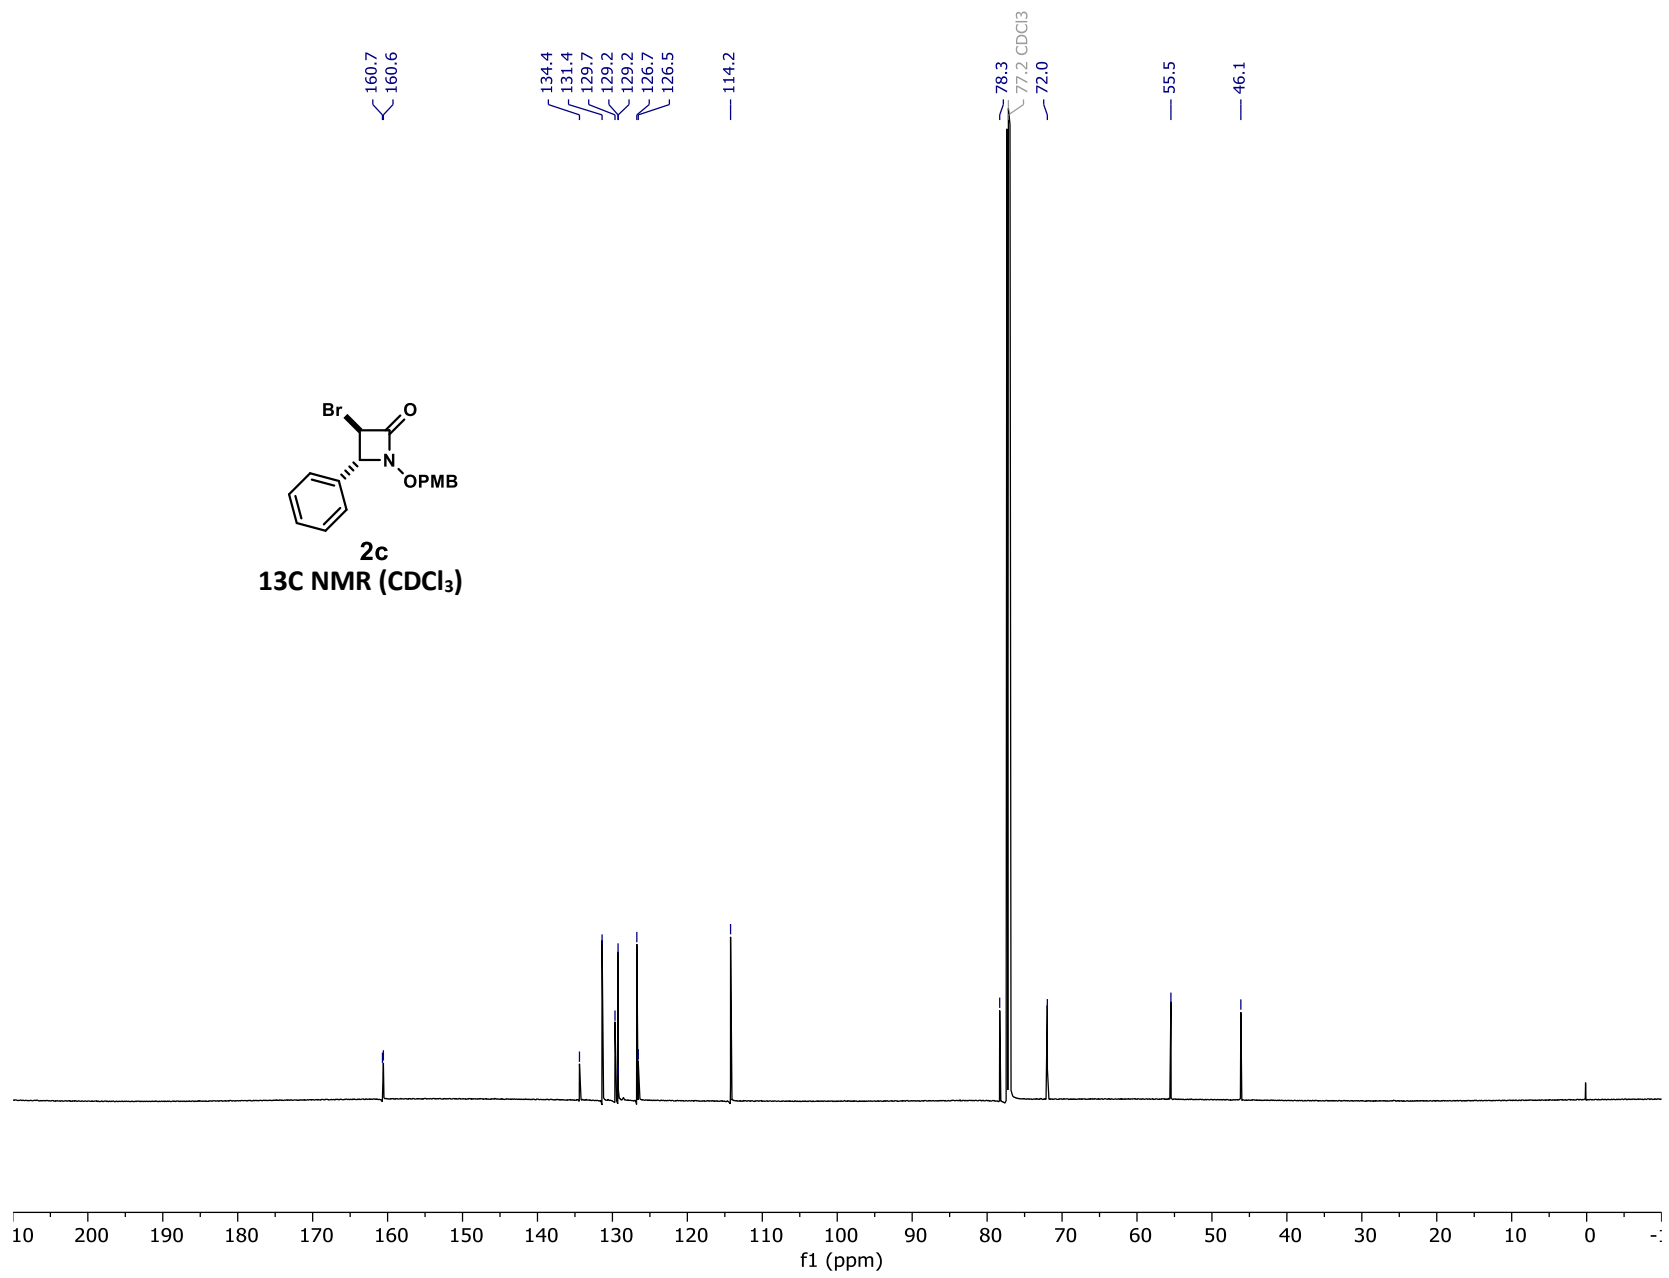



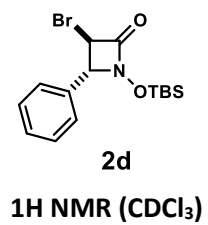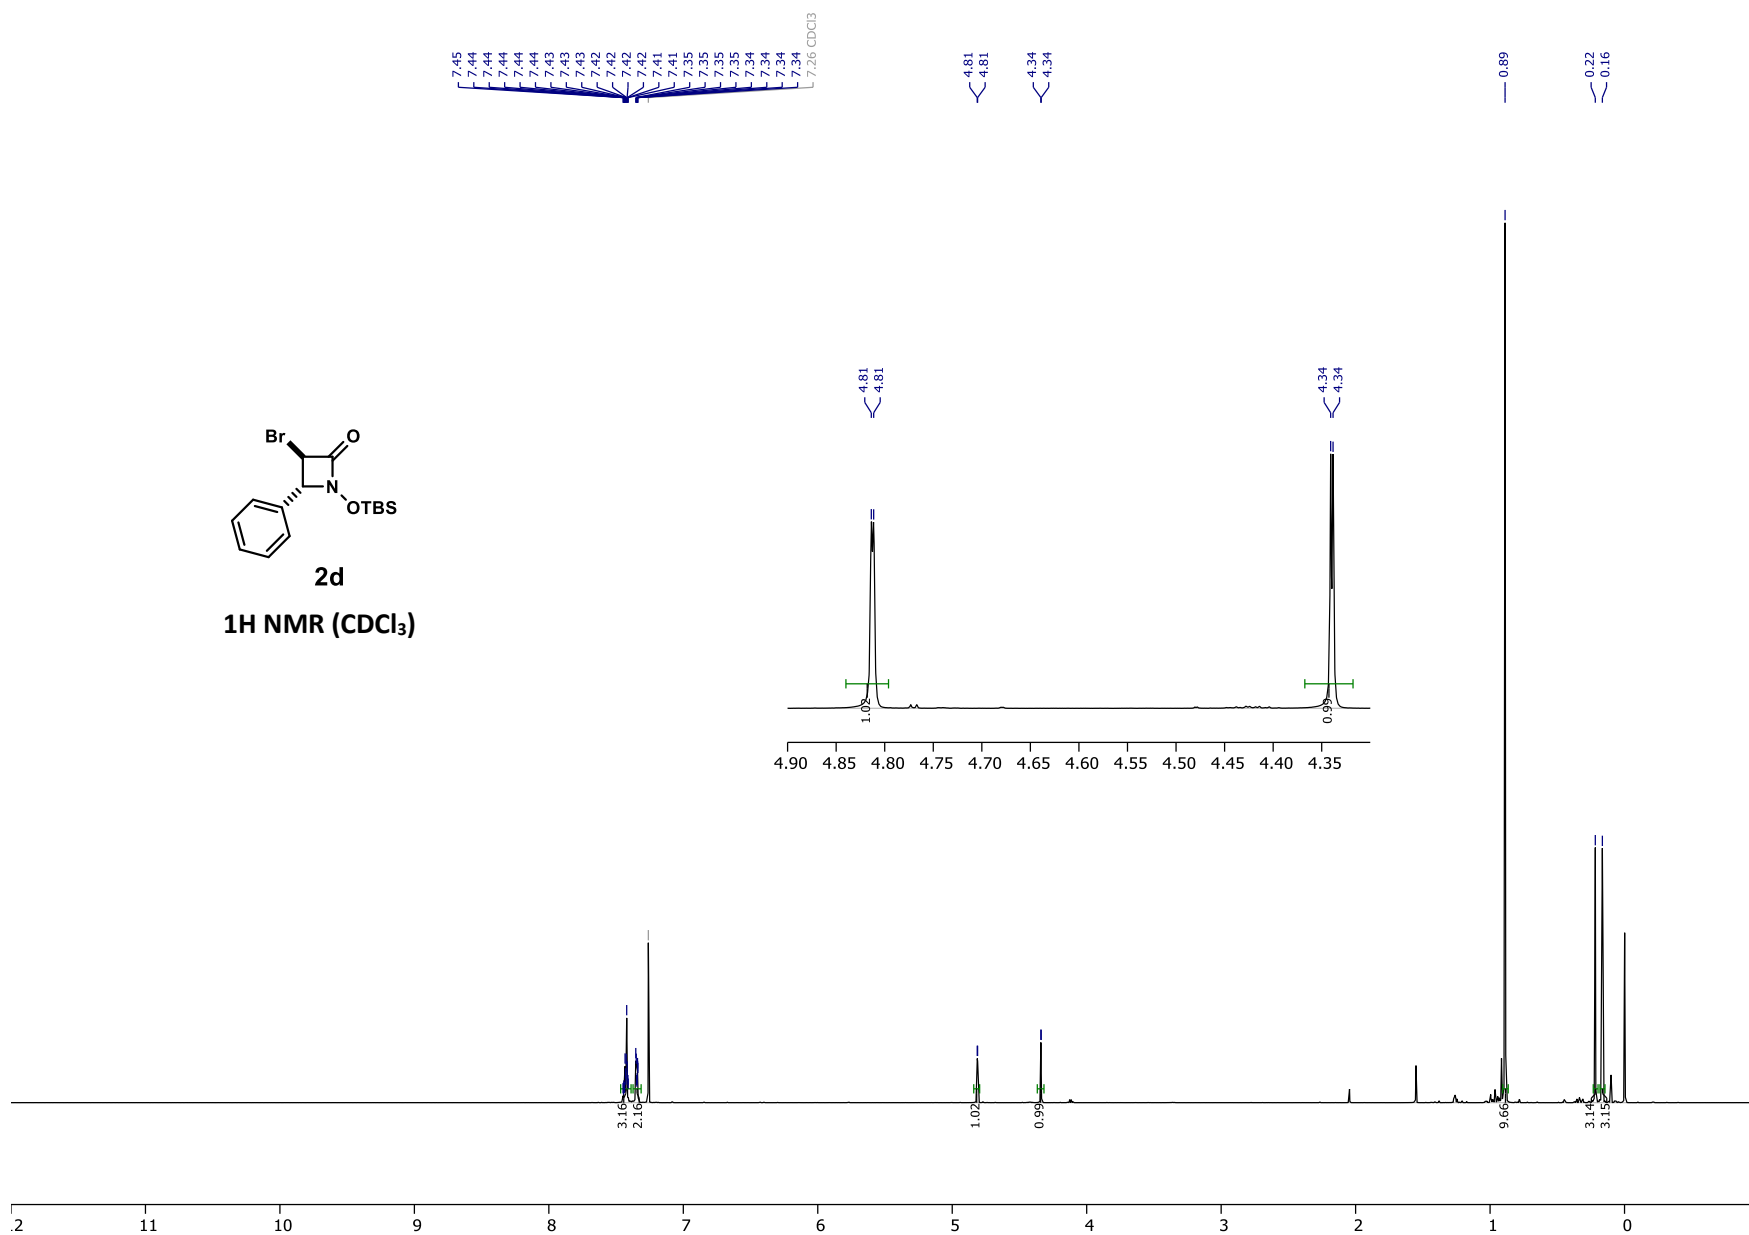

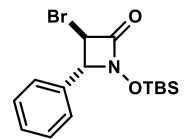

2d

<sup>13</sup>C NMR (CDCl<sub>3</sub>)

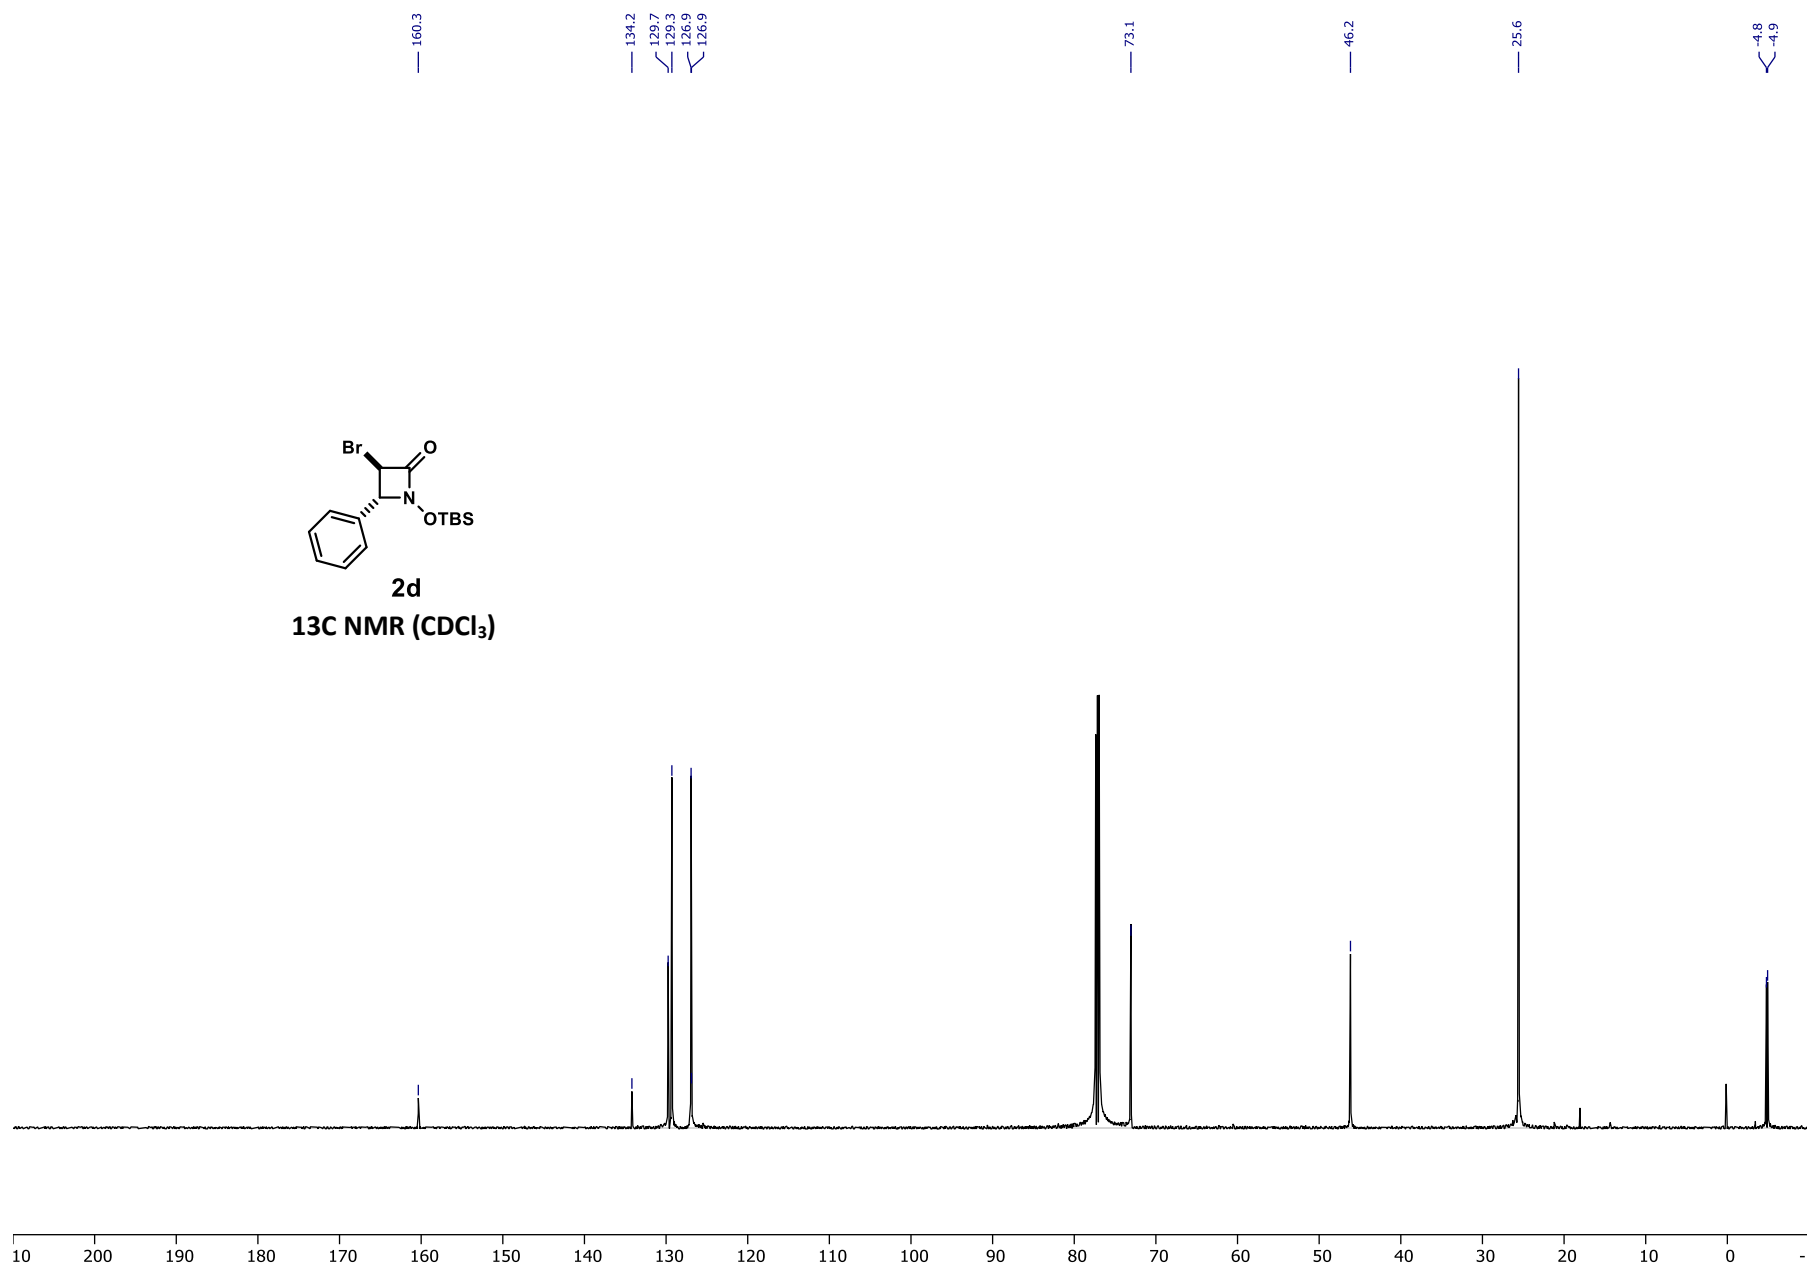

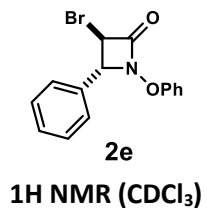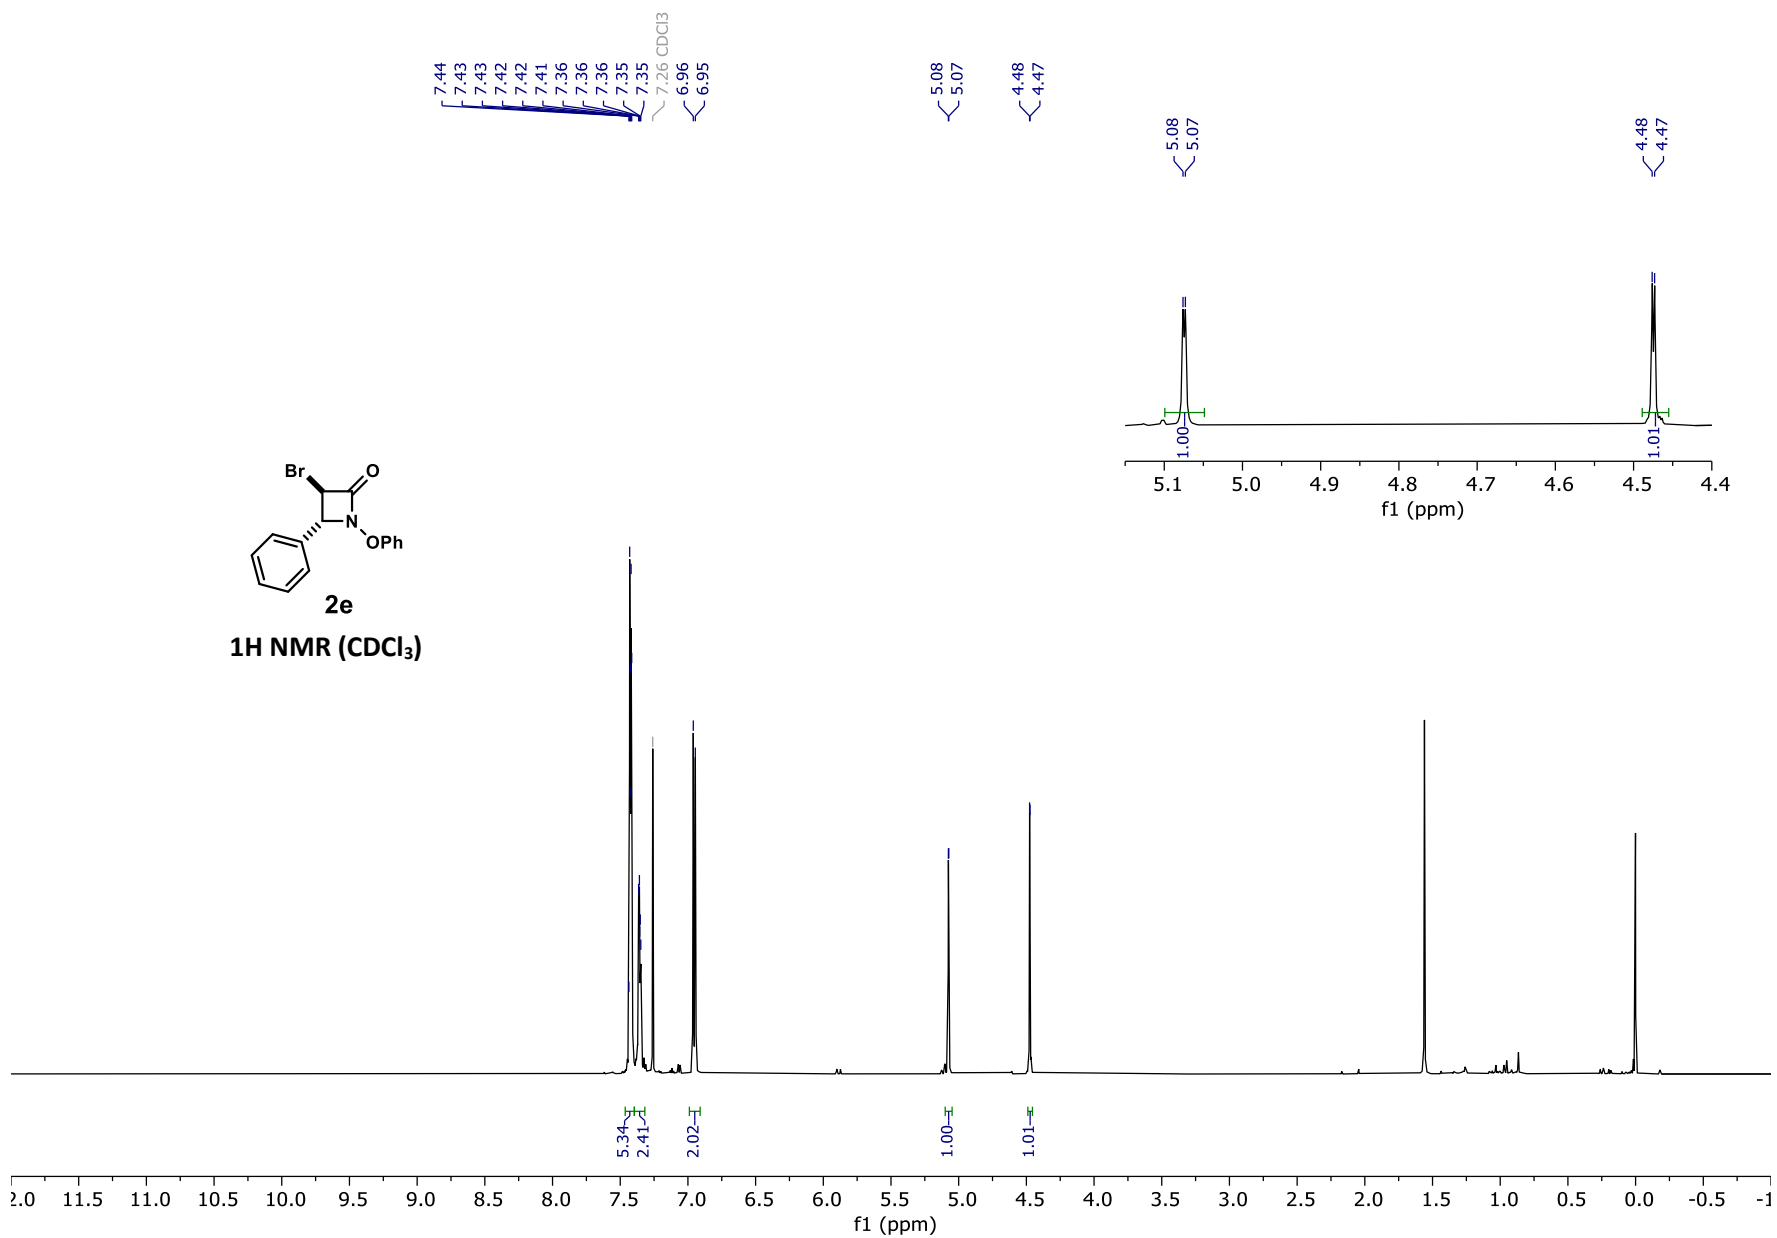

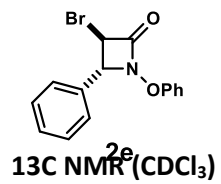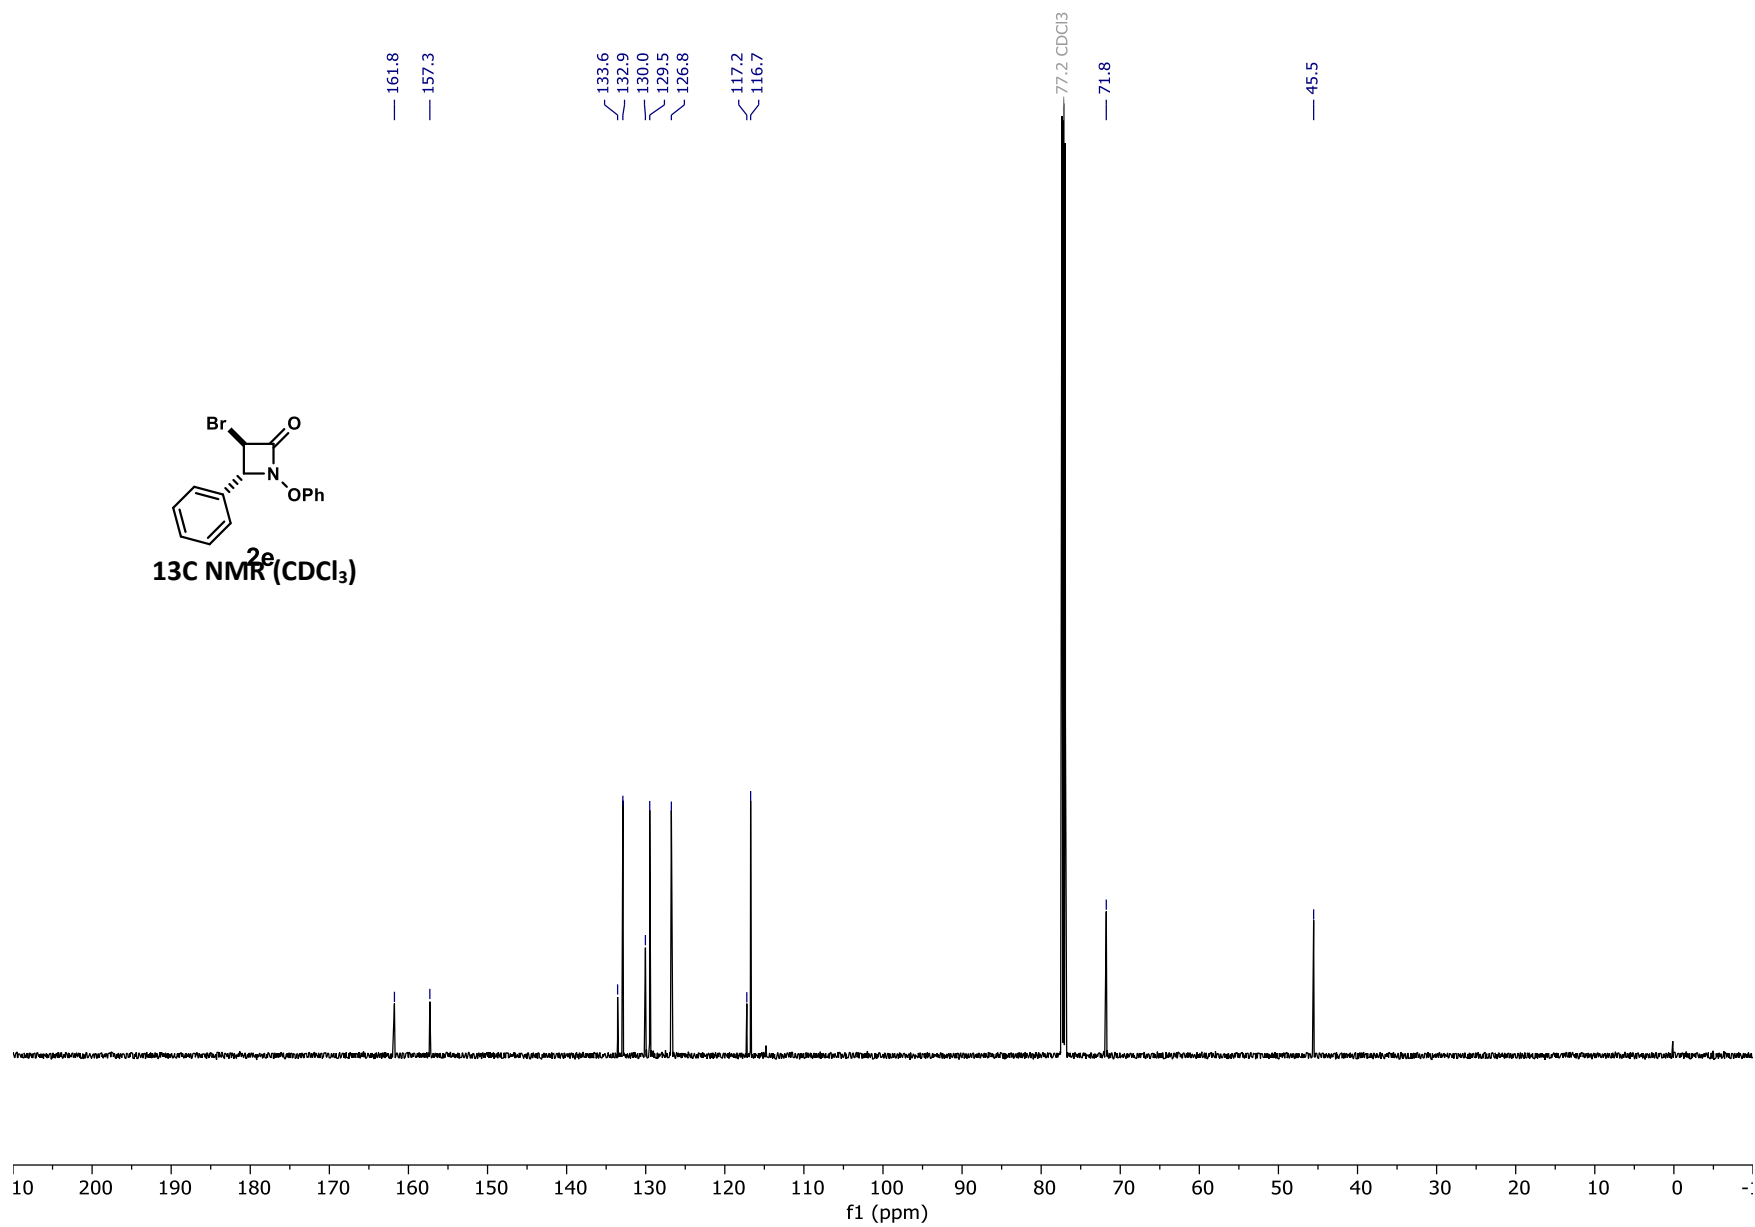

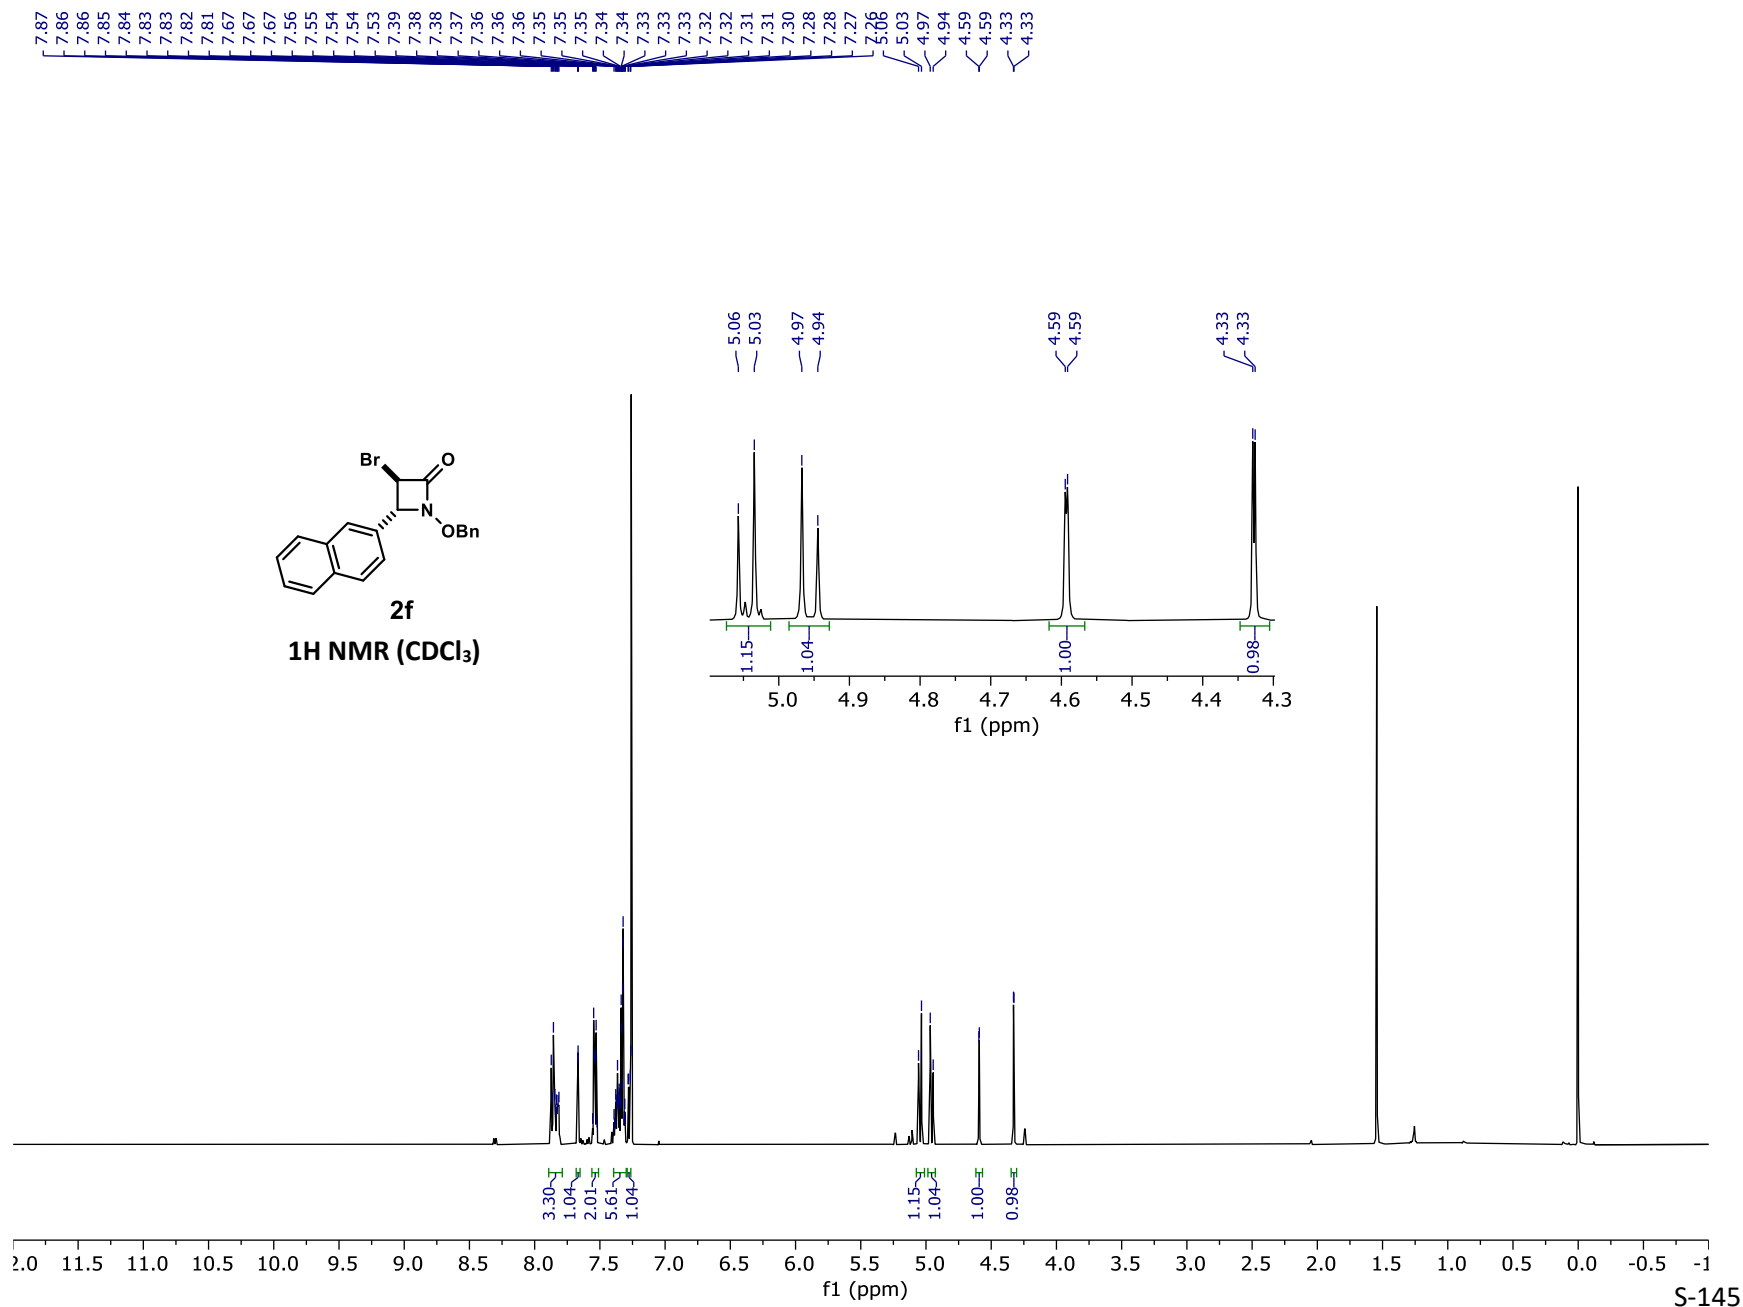

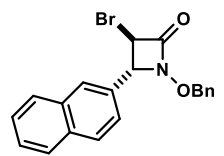

2f

<sup>13</sup>C NMR (CDCl<sub>3</sub>)

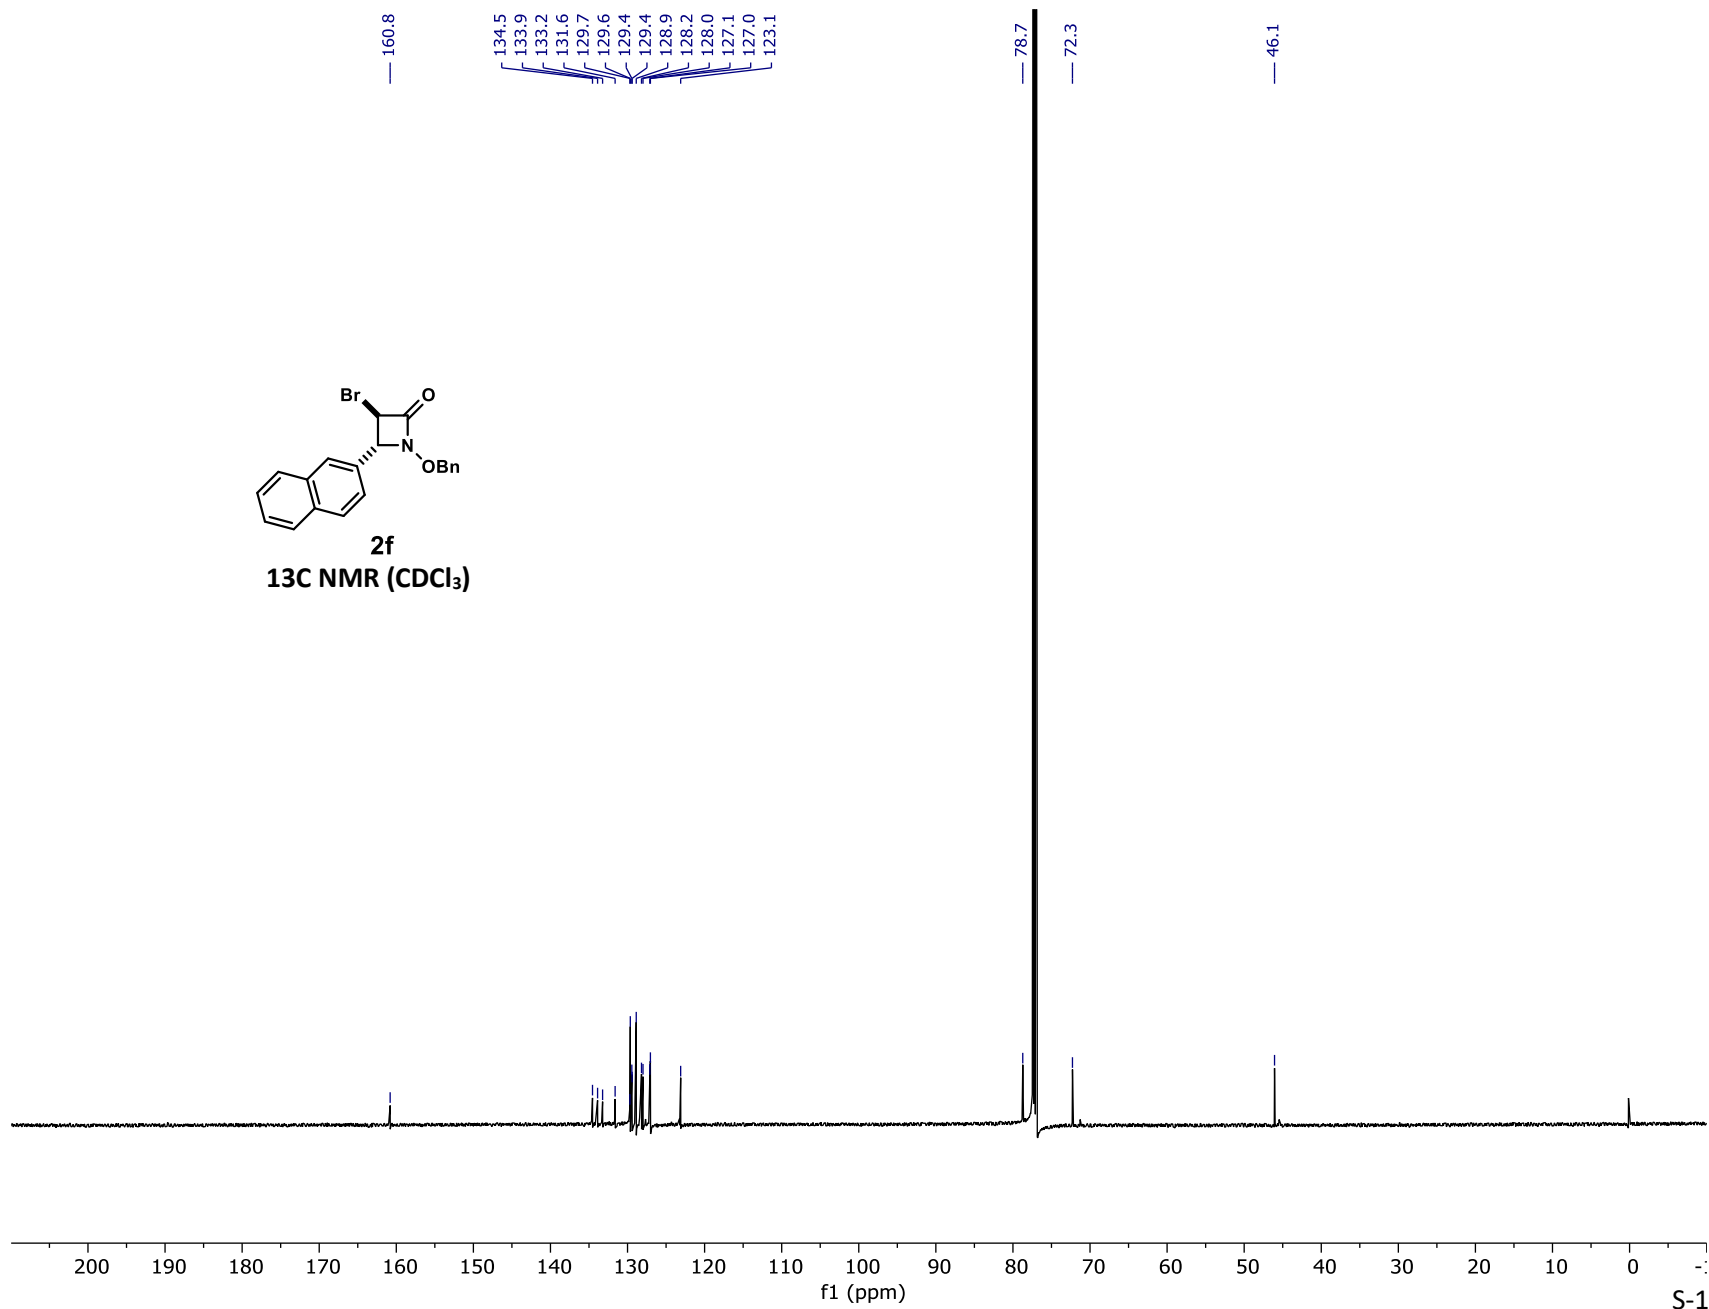

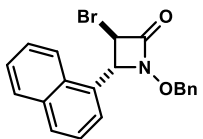

**2g**

**<sup>1</sup>H NMR (CDCl<sub>3</sub>)**

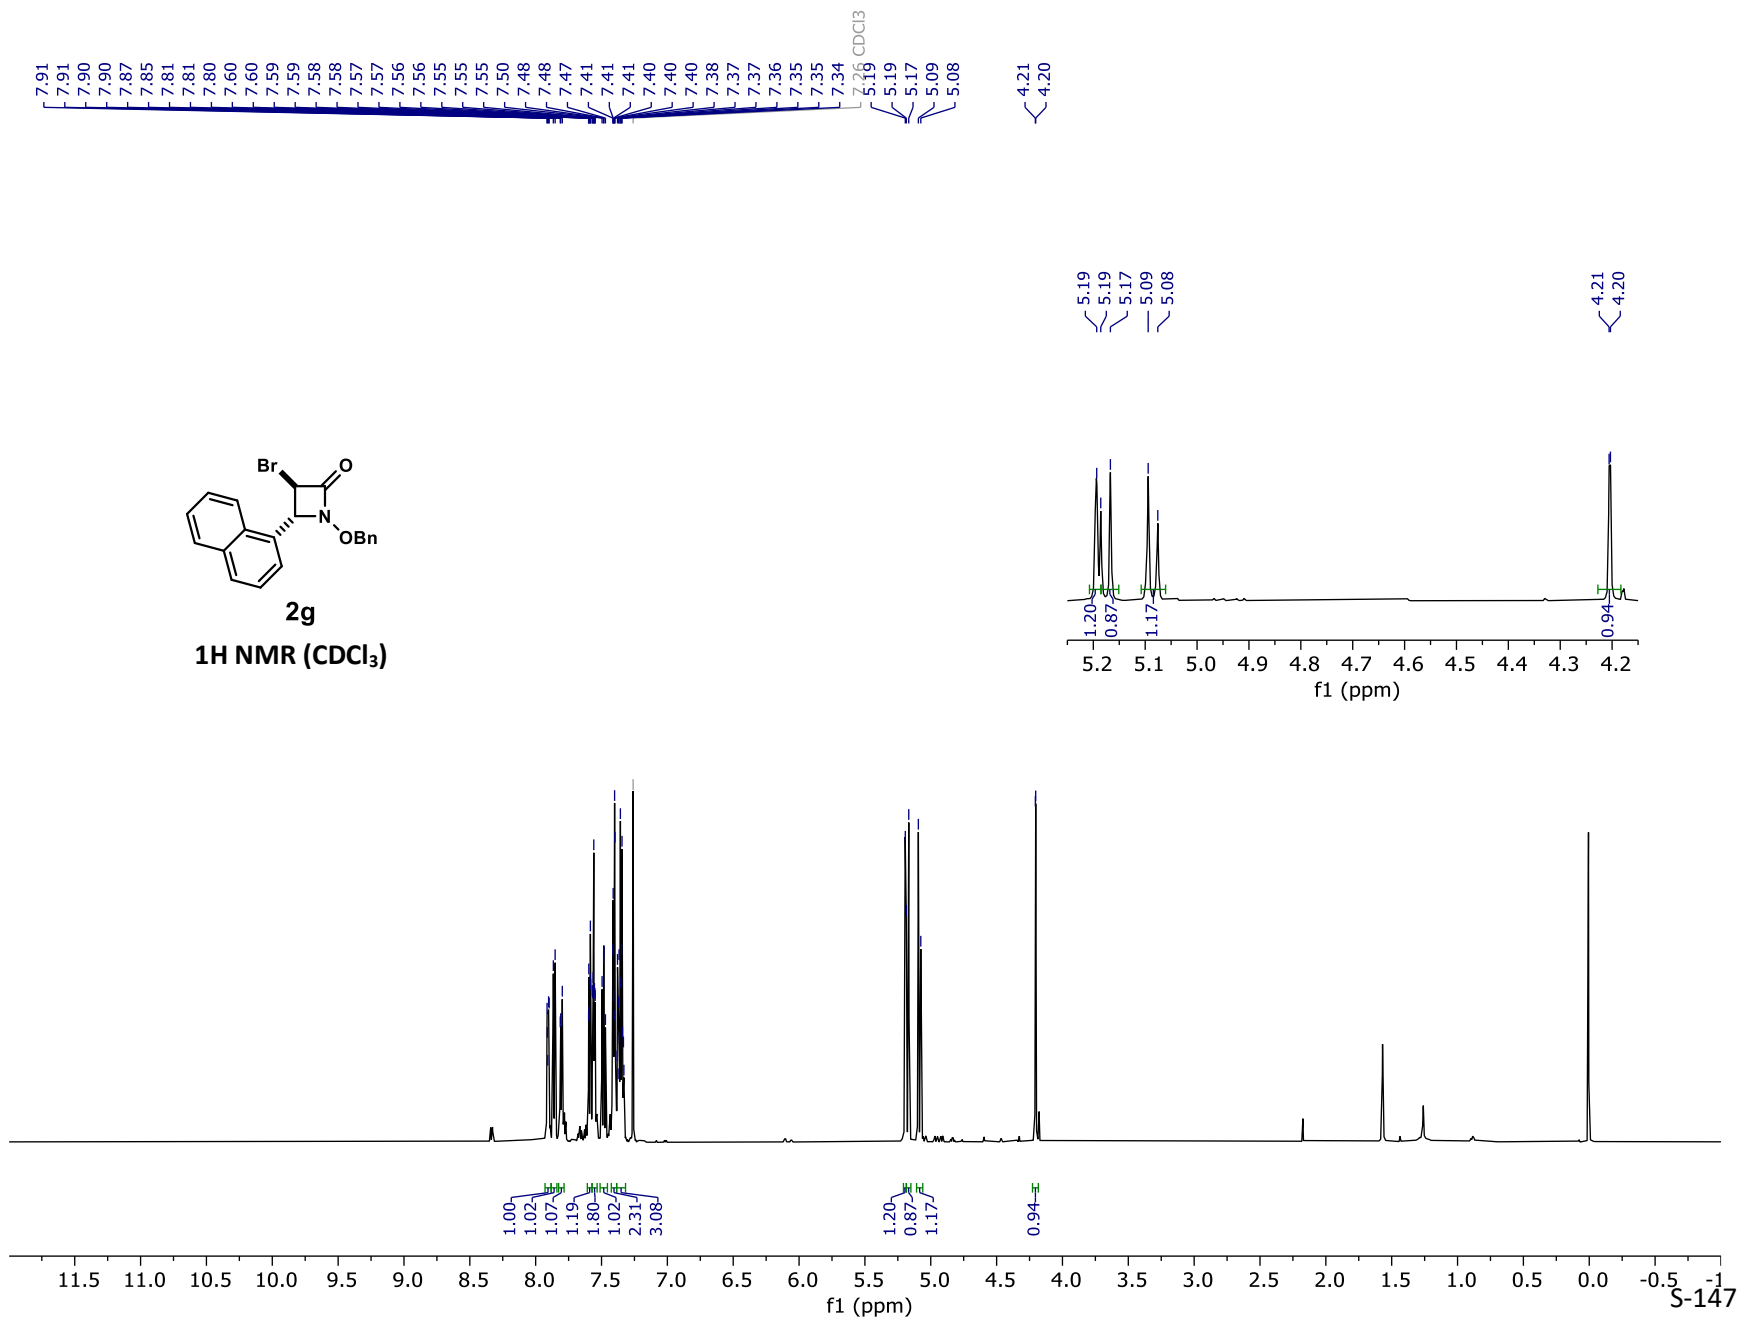

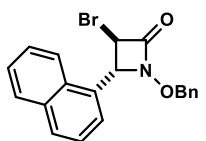

**2g**  
**<sup>13</sup>C NMR (CDCl<sub>3</sub>)**

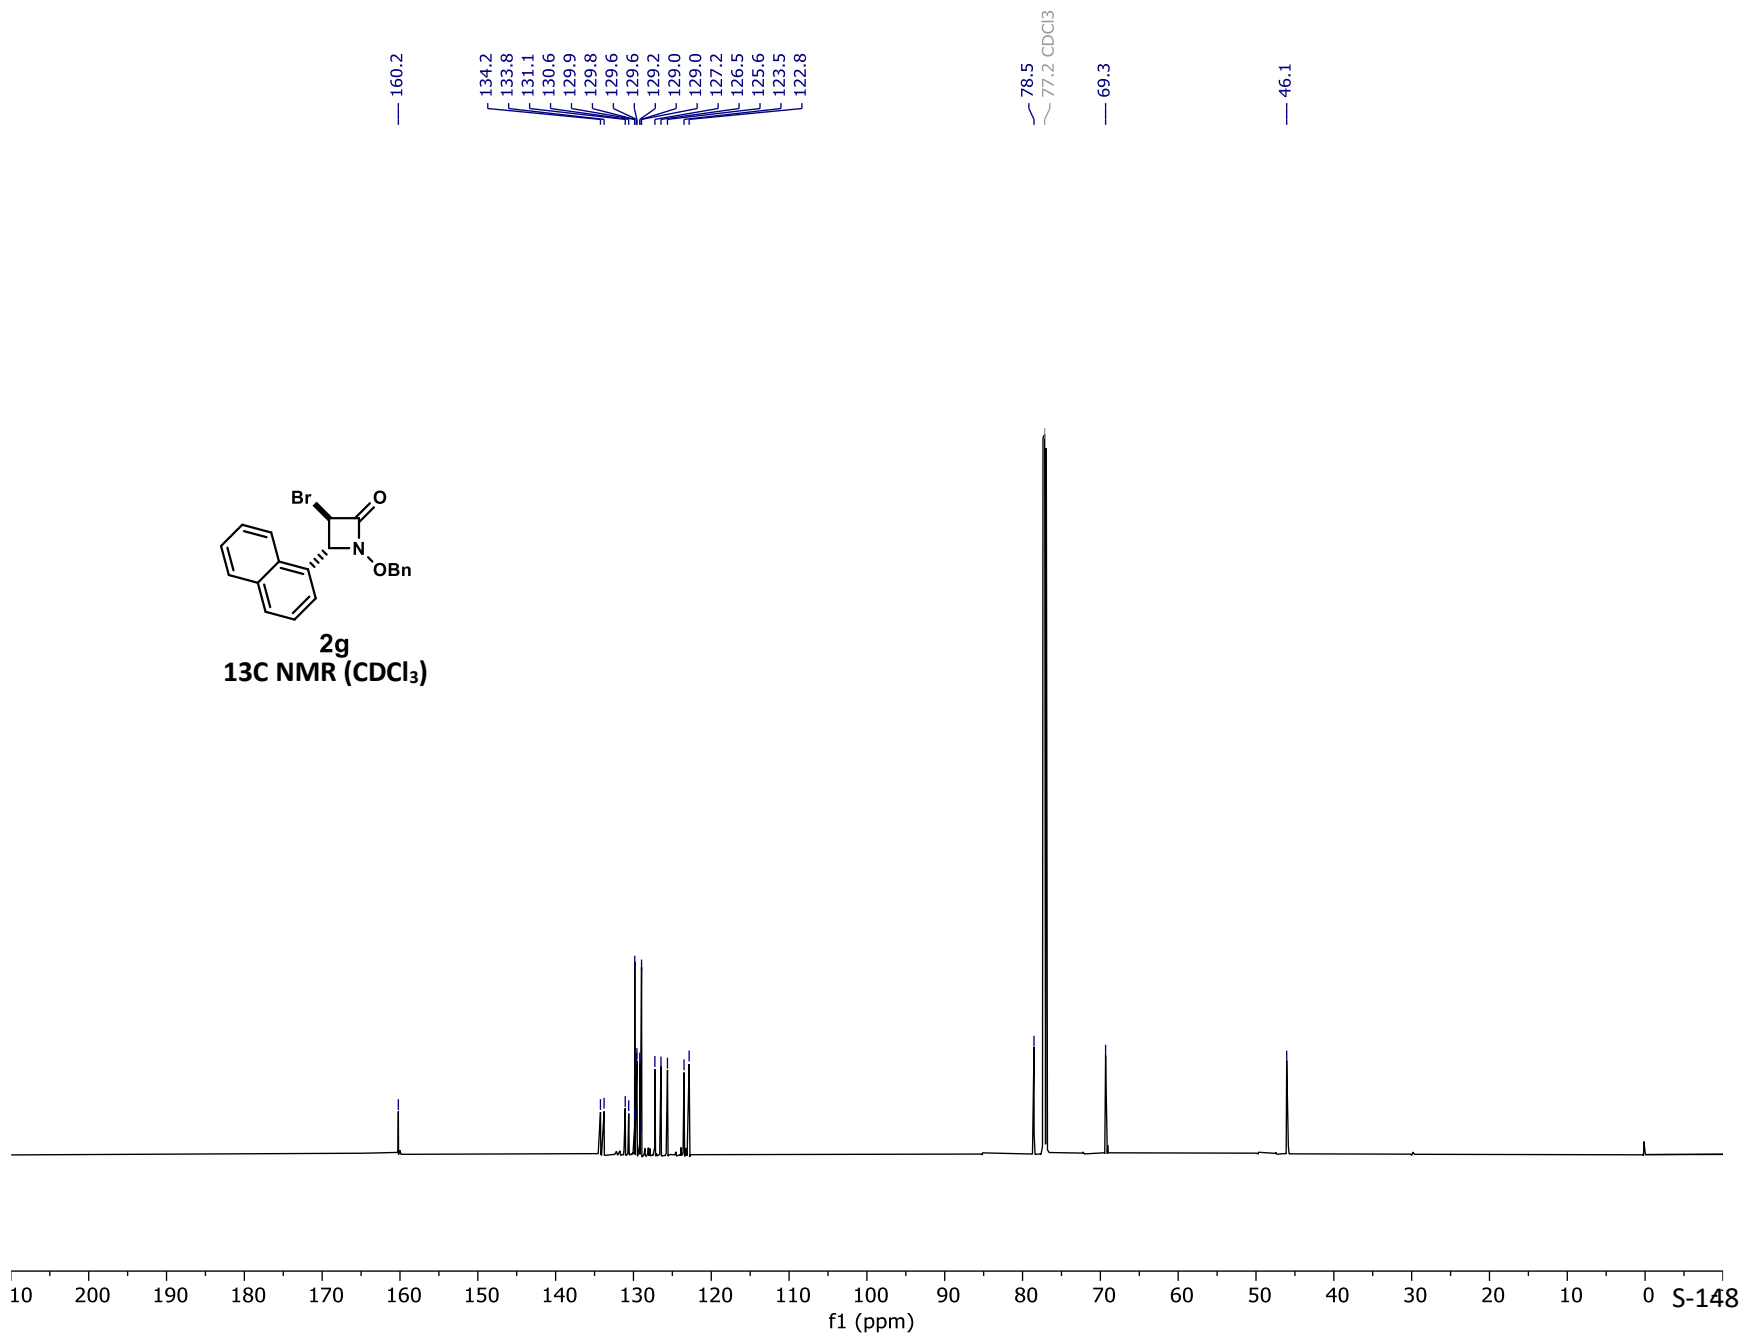



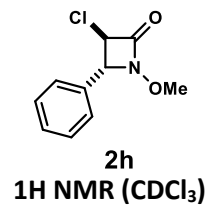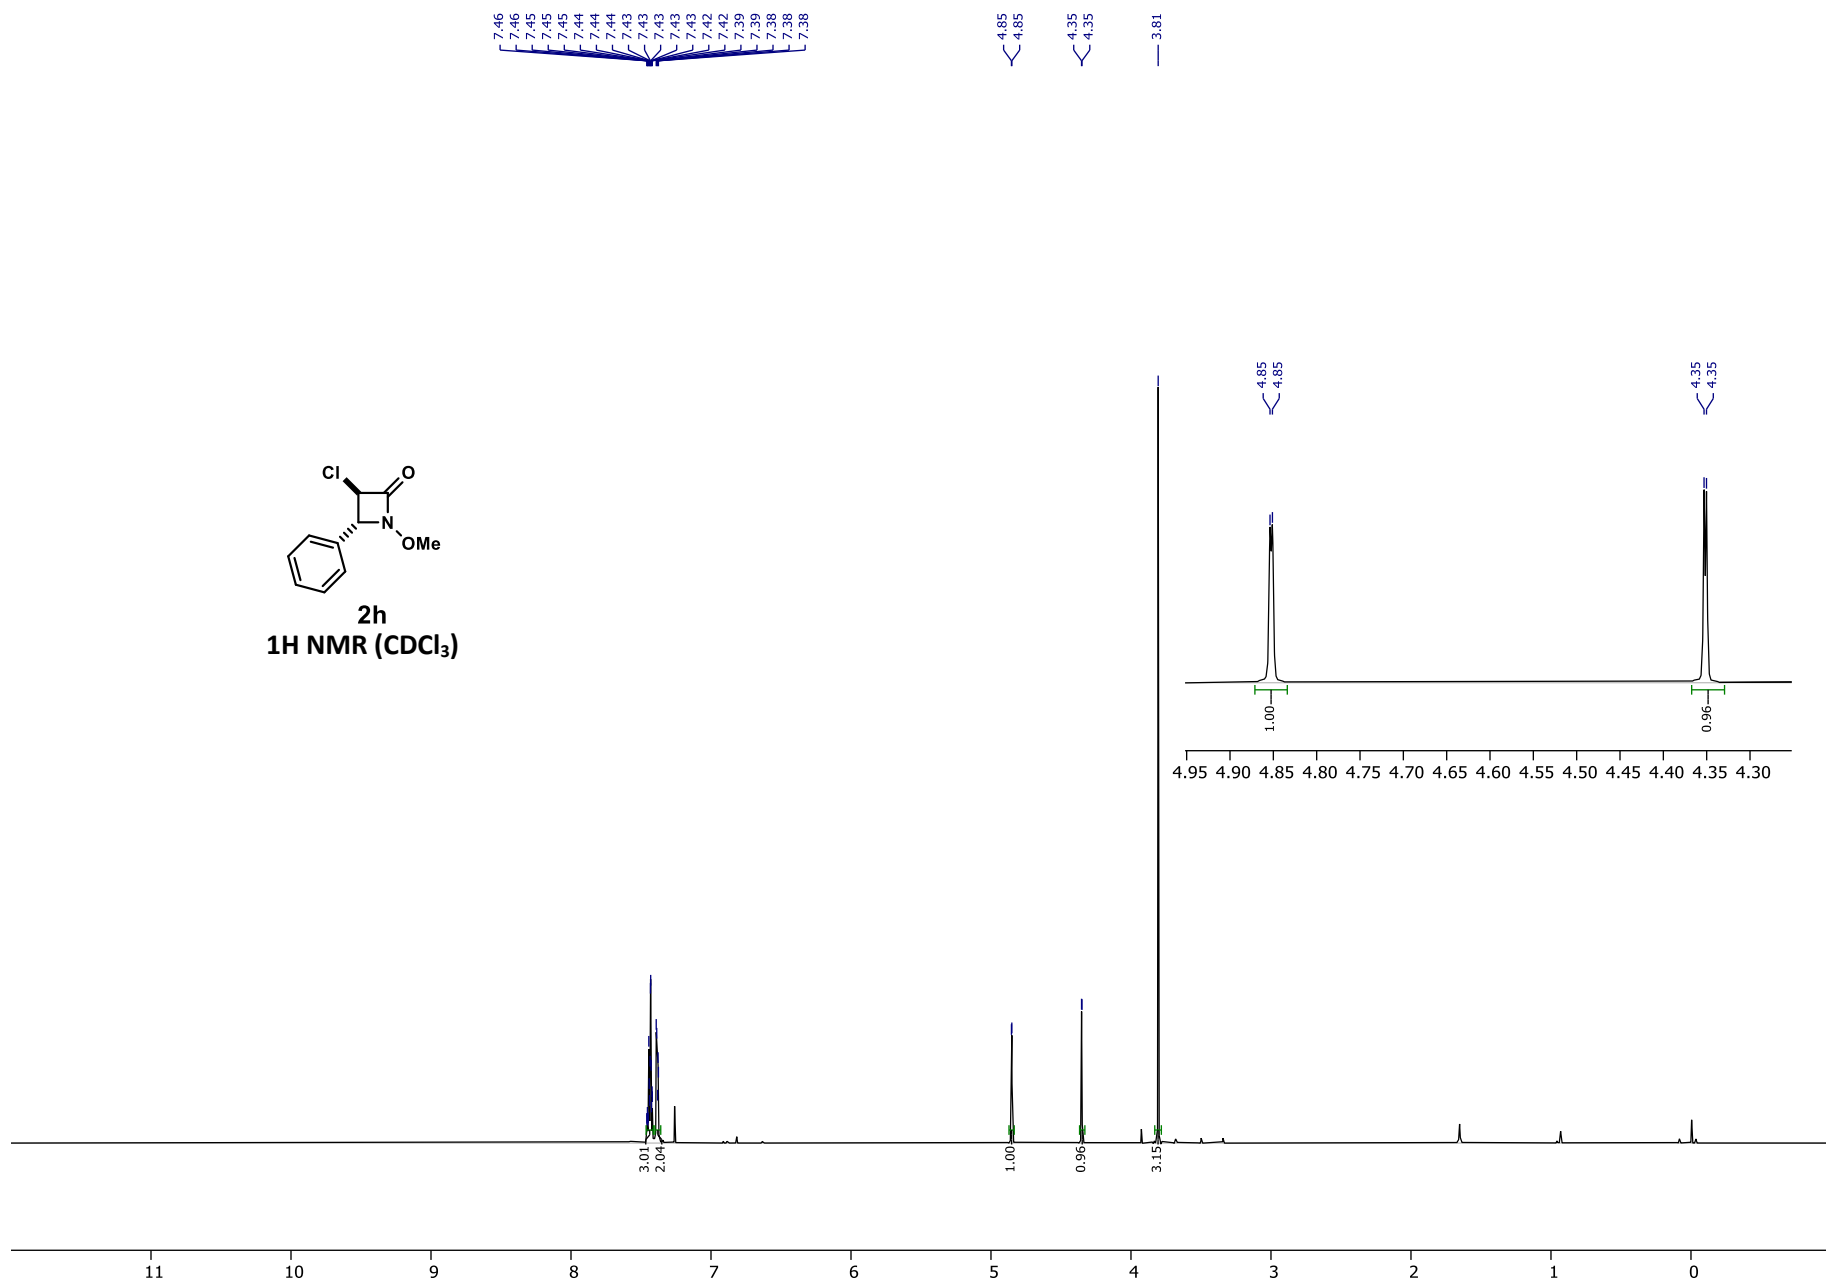

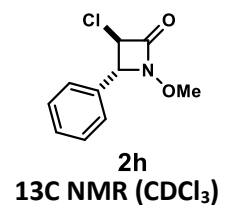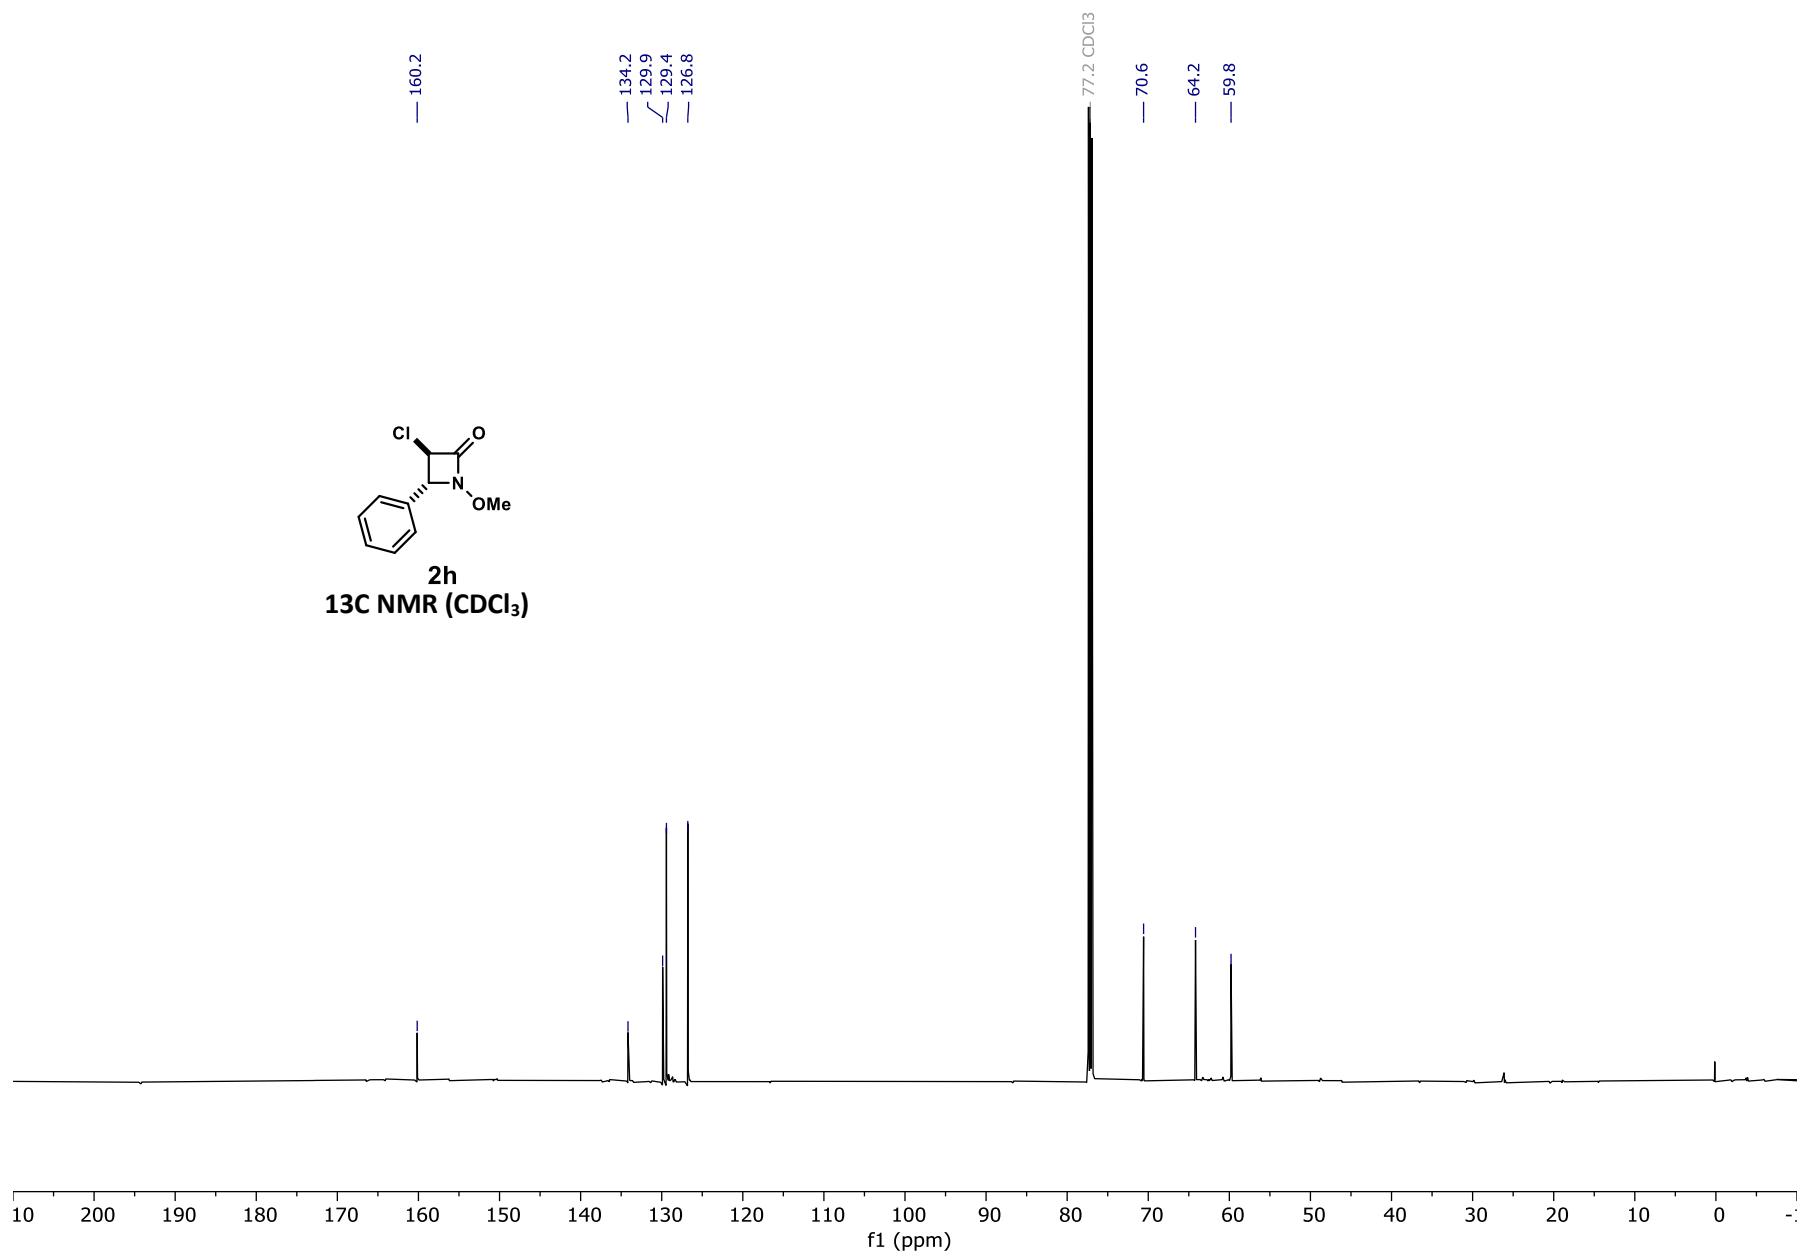

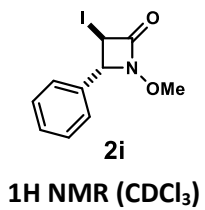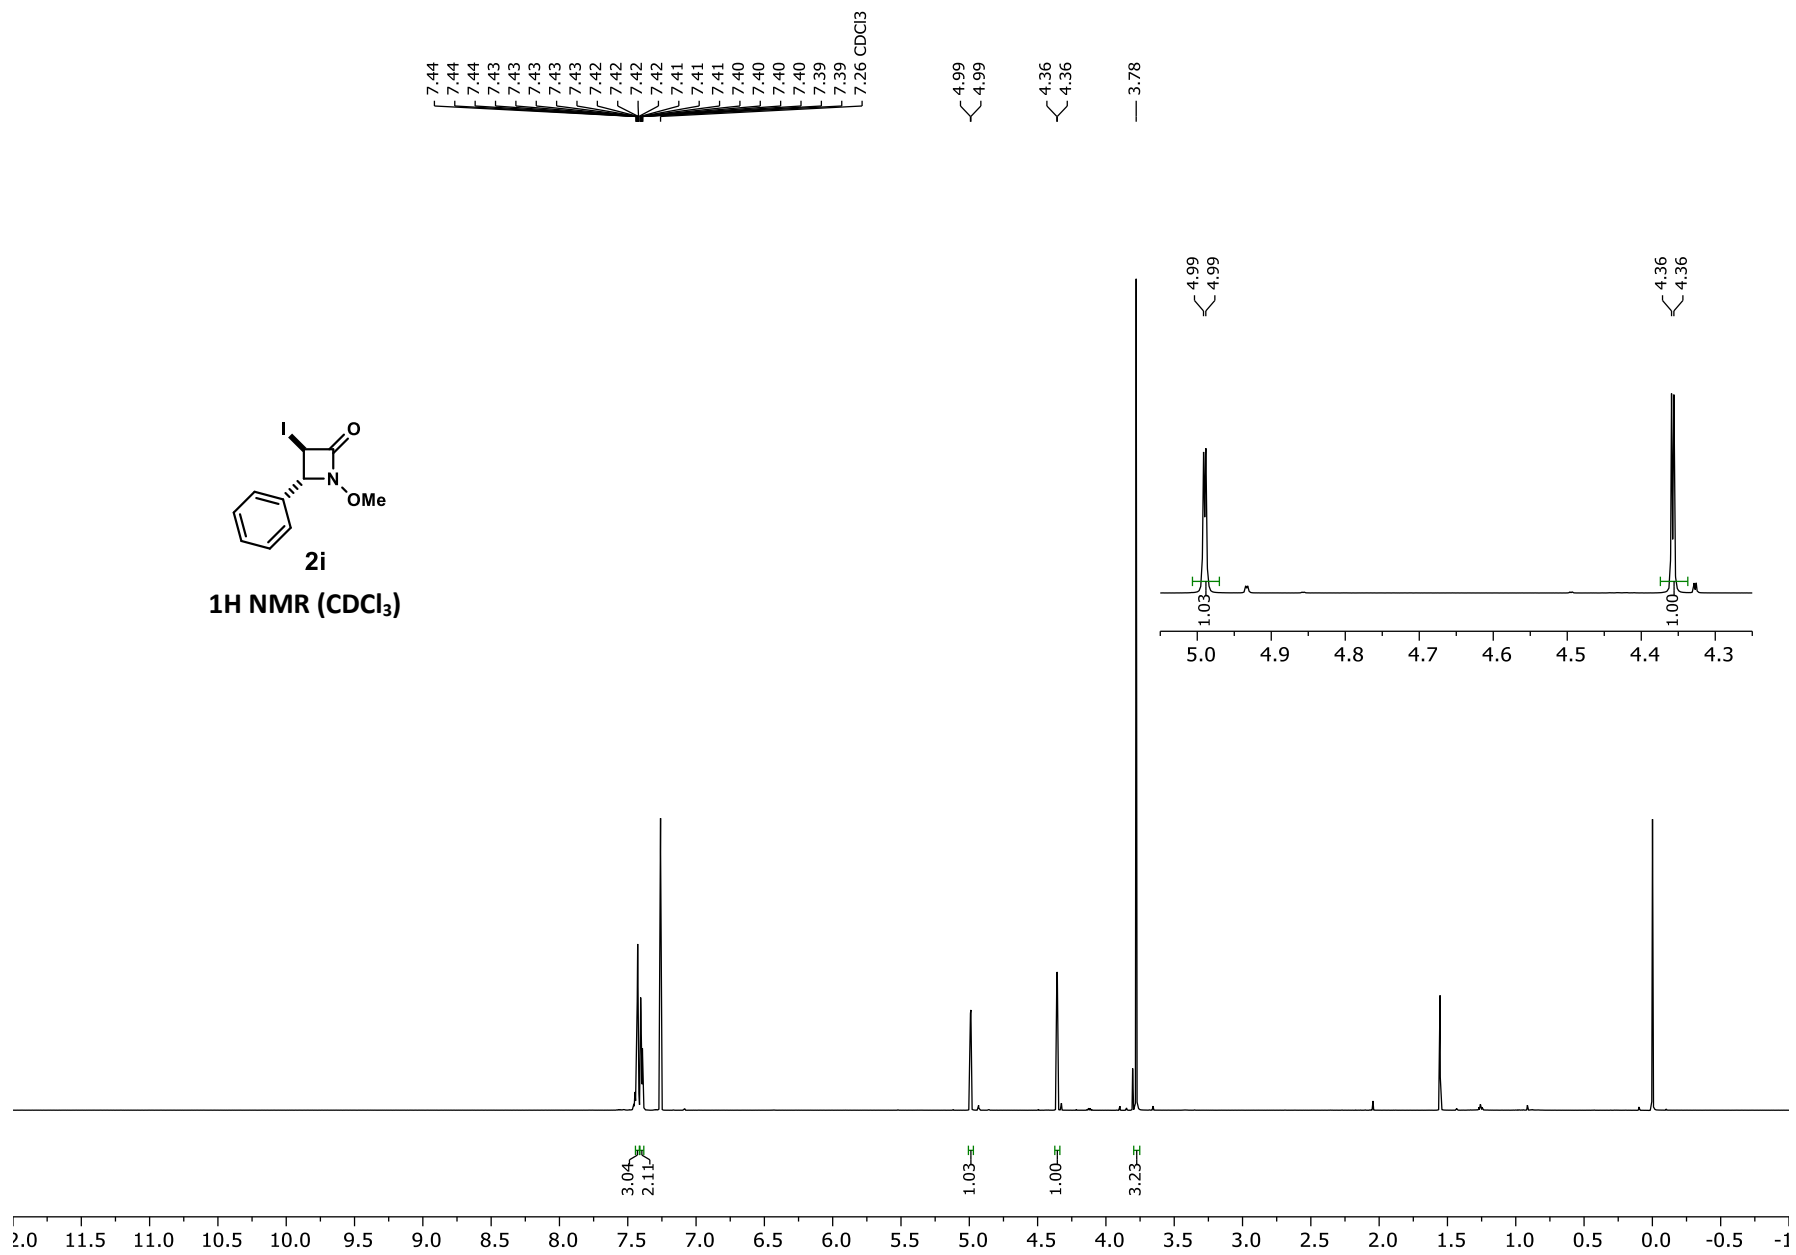

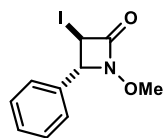

2i

**<sup>13</sup>C NMR (CDCl<sub>3</sub>)**

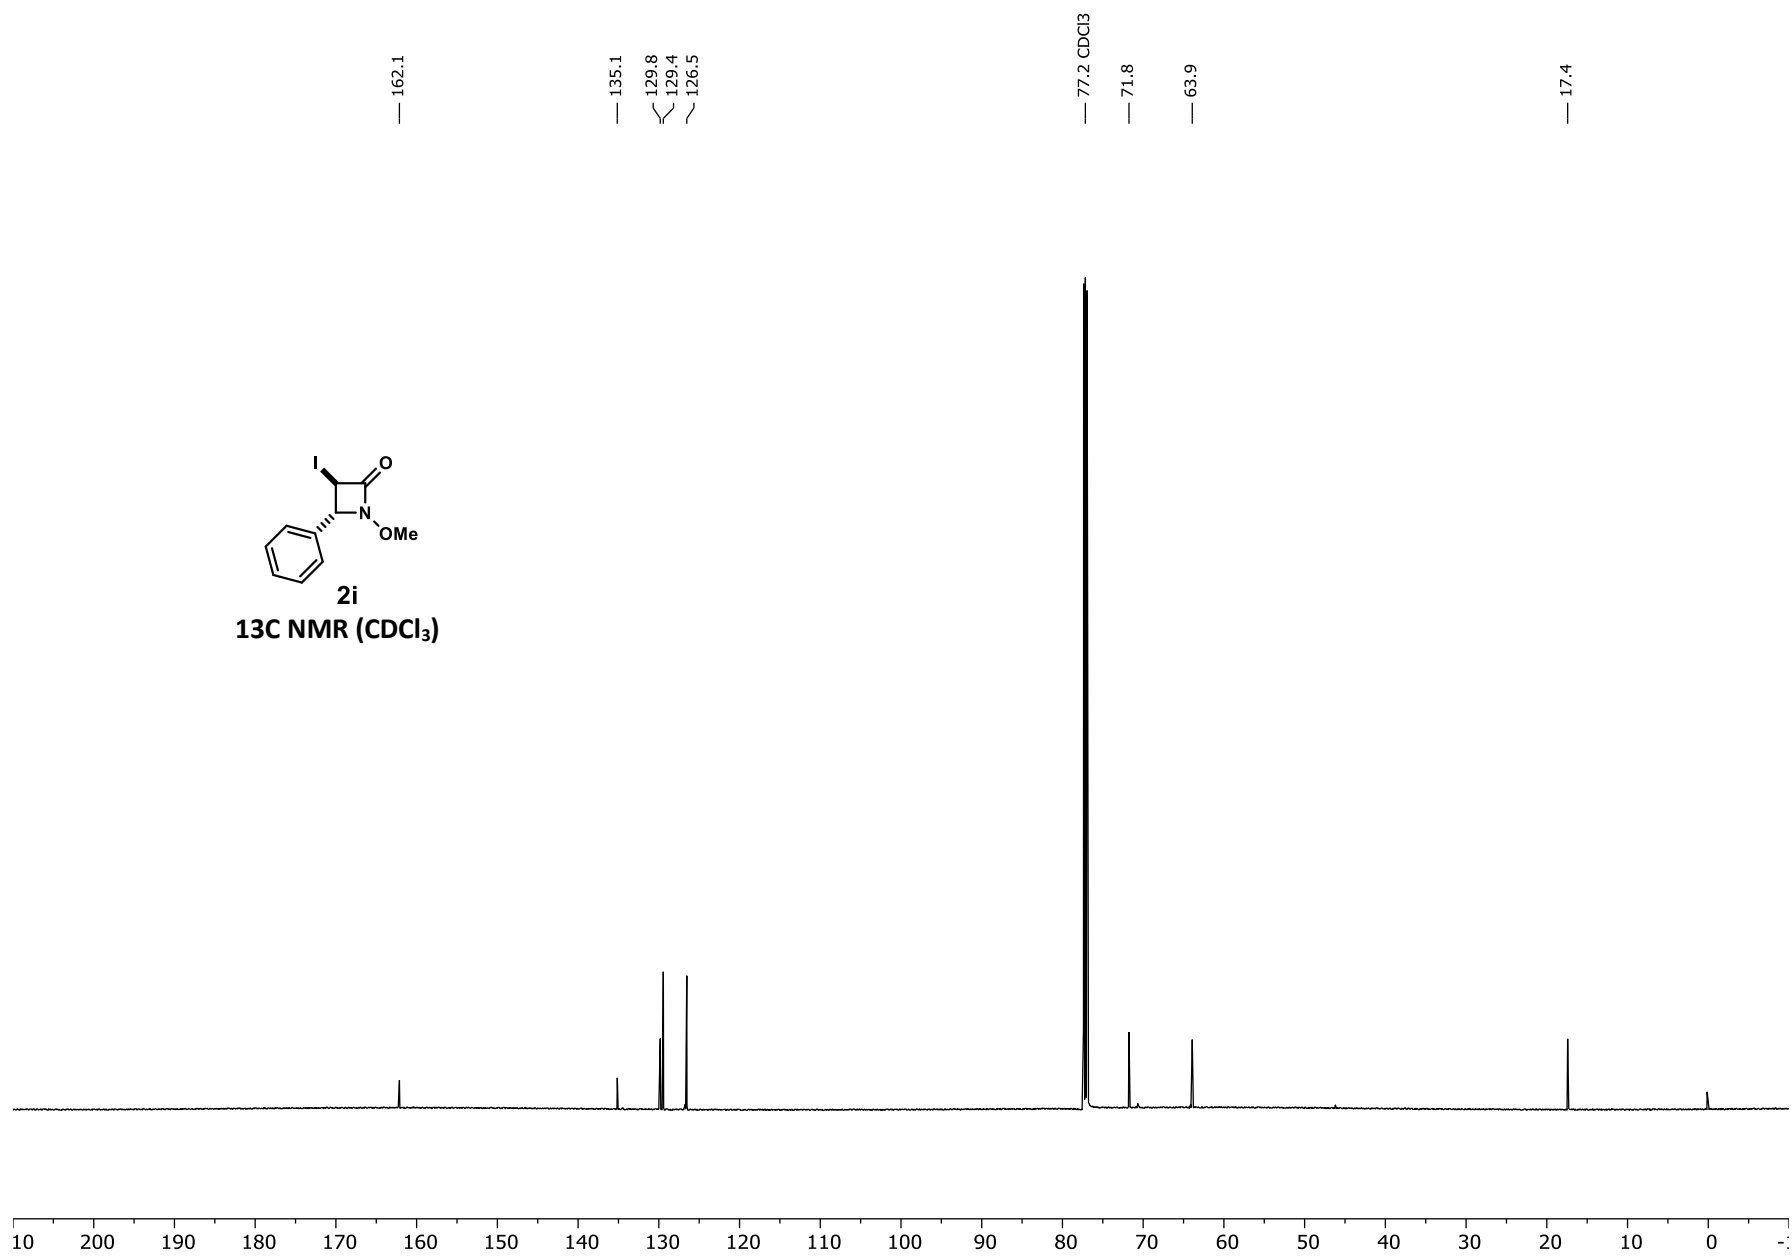

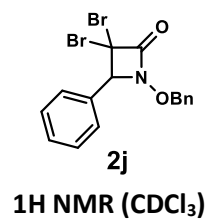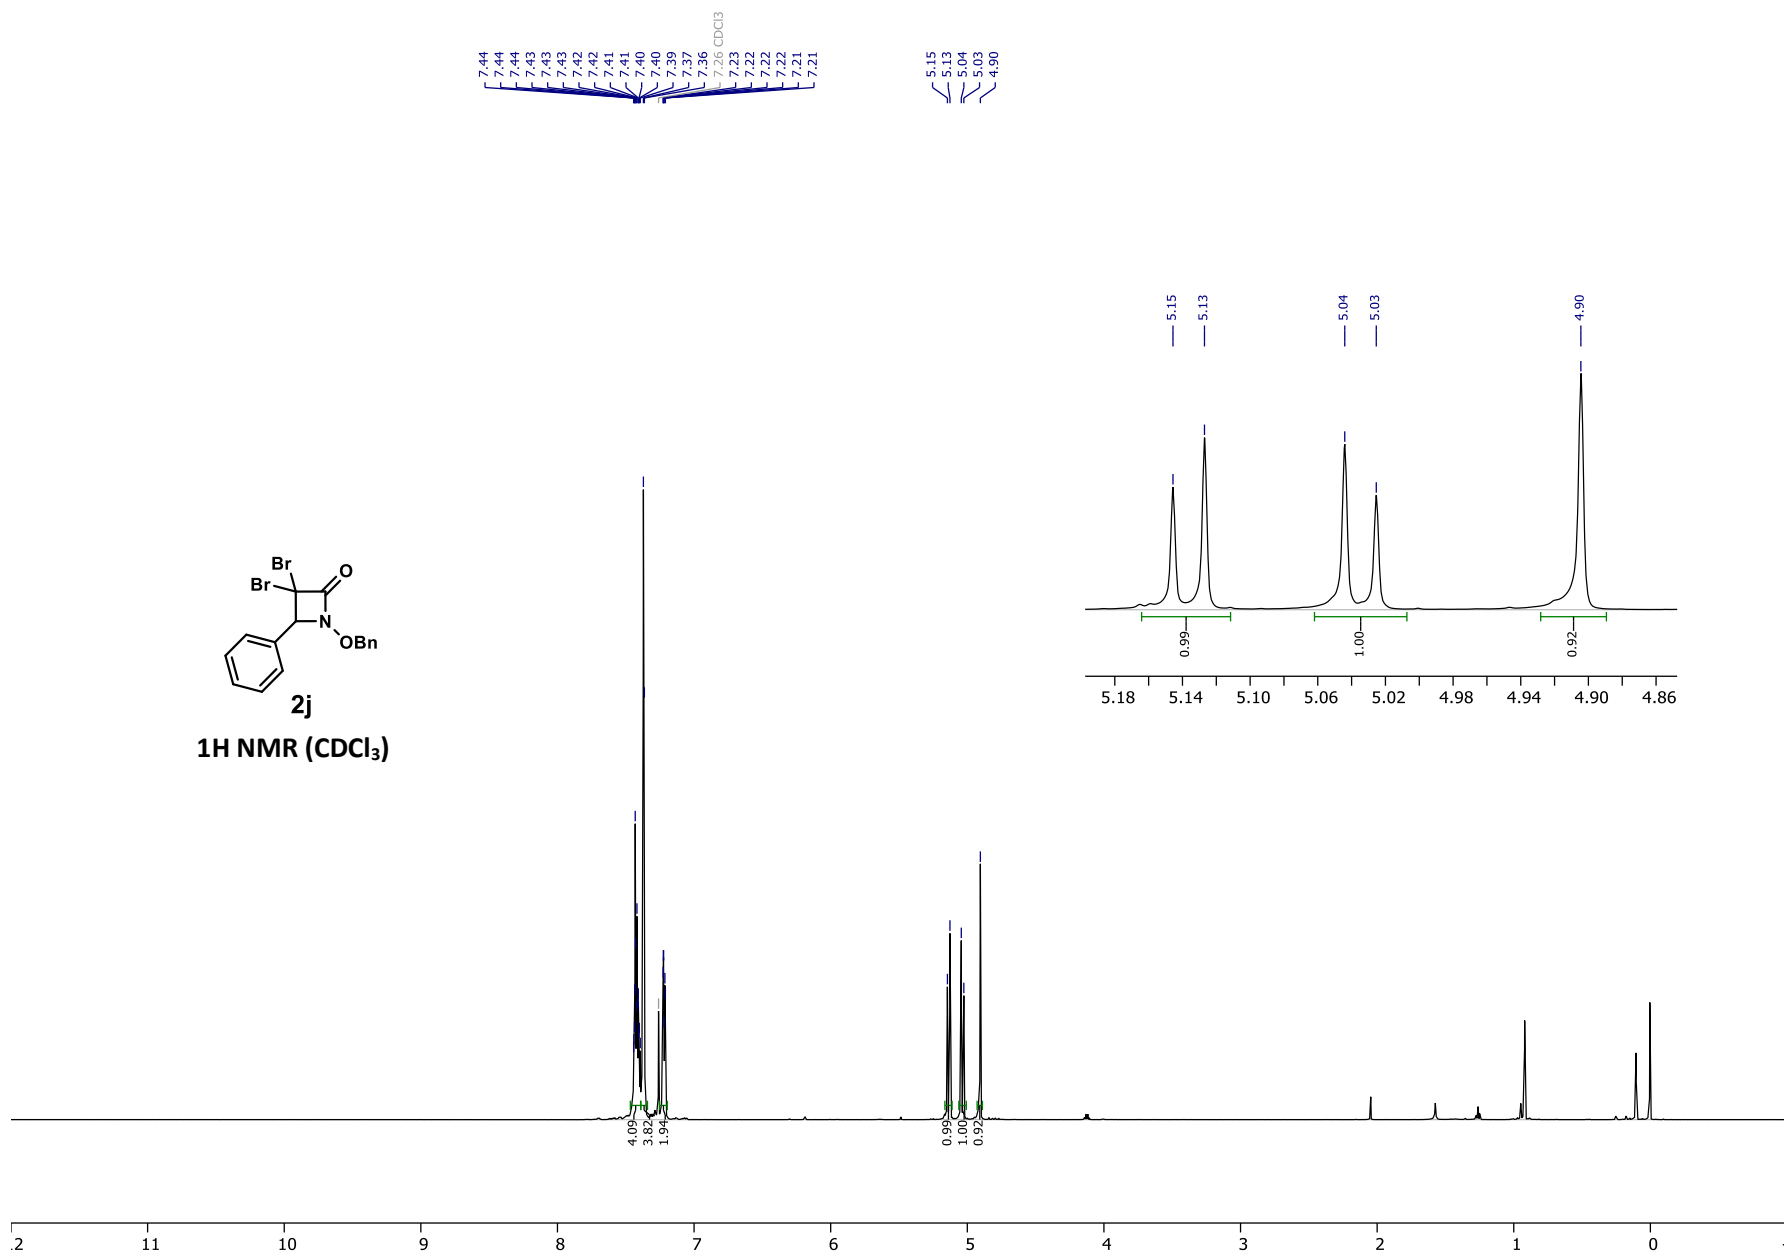

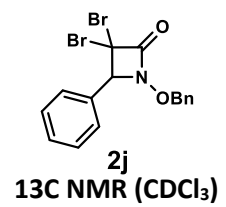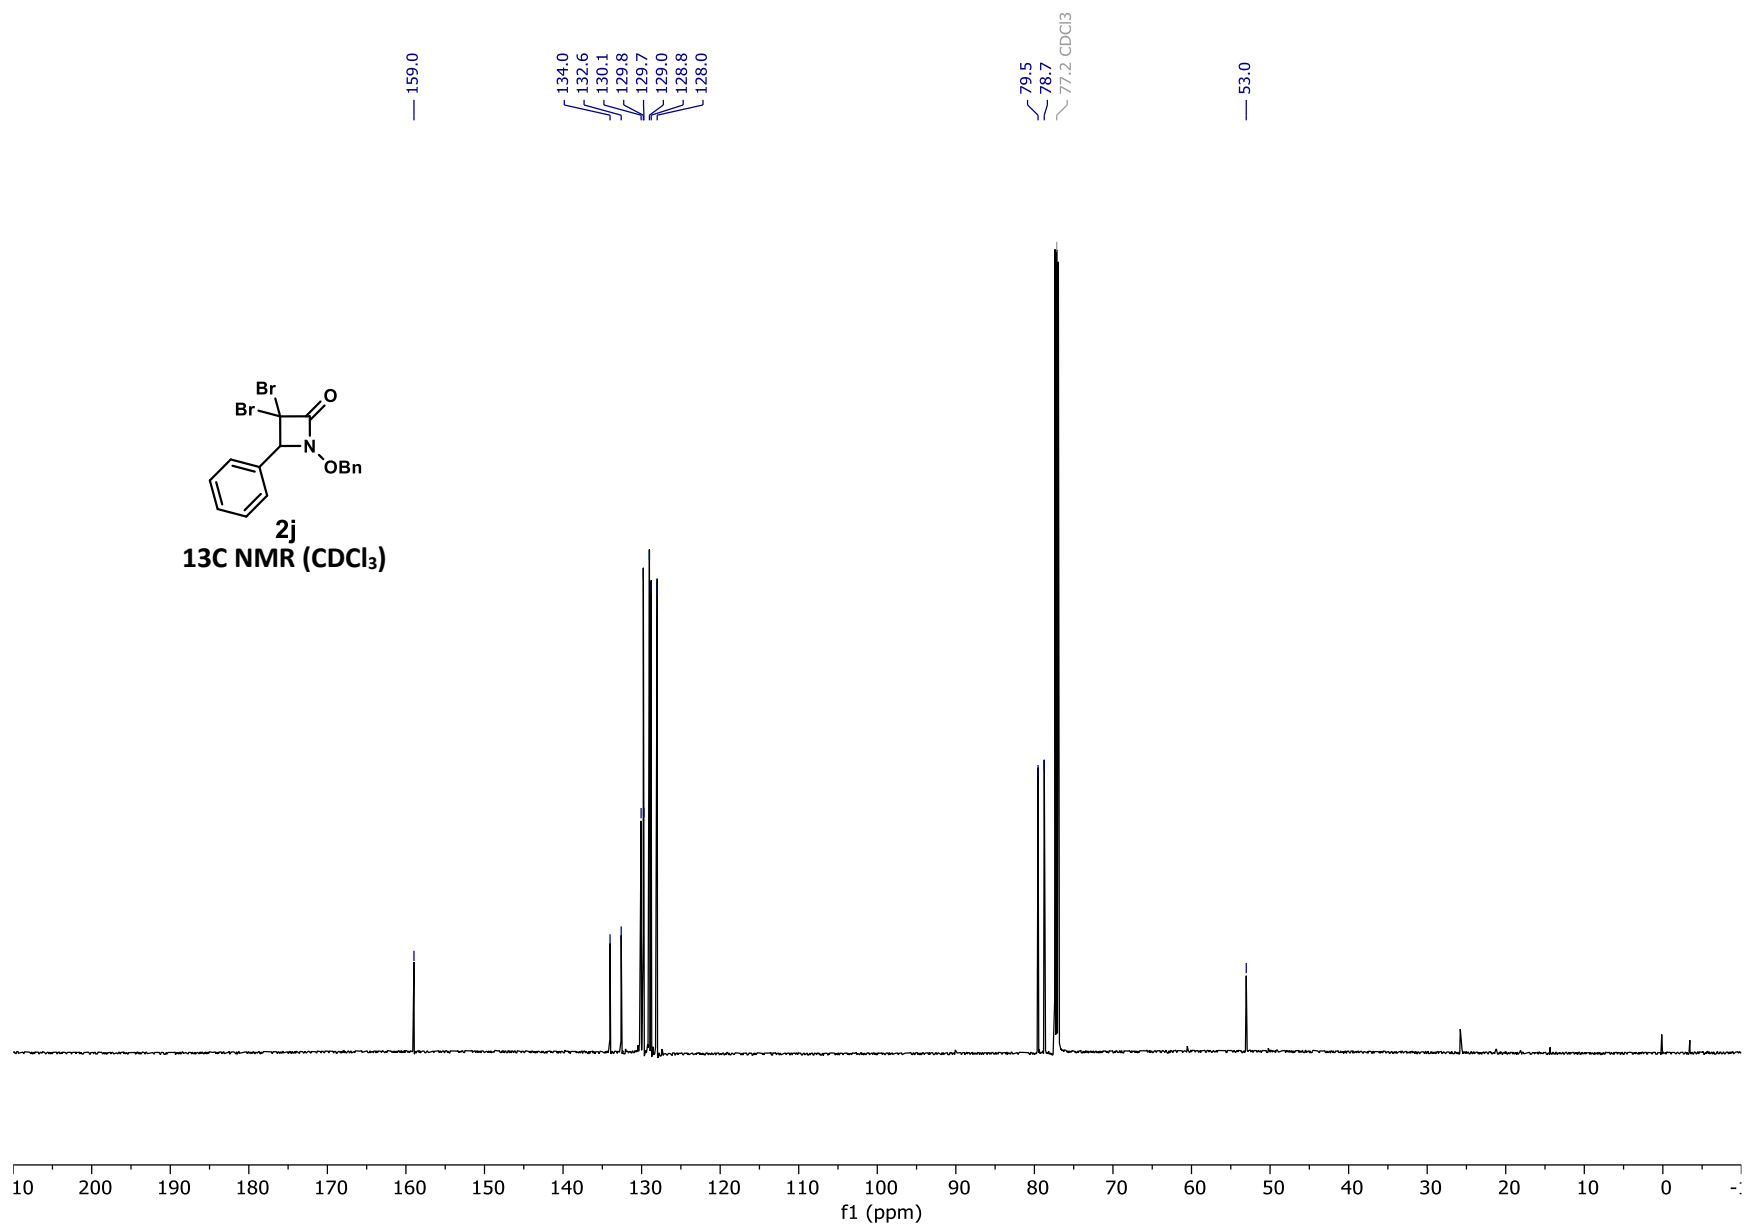

7.44  
7.44  
7.43  
7.43  
7.43  
7.43  
7.42  
7.42  
7.41  
7.41  
7.41  
7.40  
7.40  
7.40  
7.39  
7.37  
7.37  
7.37  
7.36  
7.36  
7.26 CDCl<sub>3</sub>  
7.24  
7.24  
7.23  
7.23  
7.23  
7.22  
7.22  
7.22  
5.13  
5.11  
5.03  
5.02  
4.93

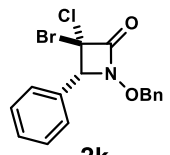

**2k**  
**<sup>1</sup>H NMR (CDCl<sub>3</sub>)**

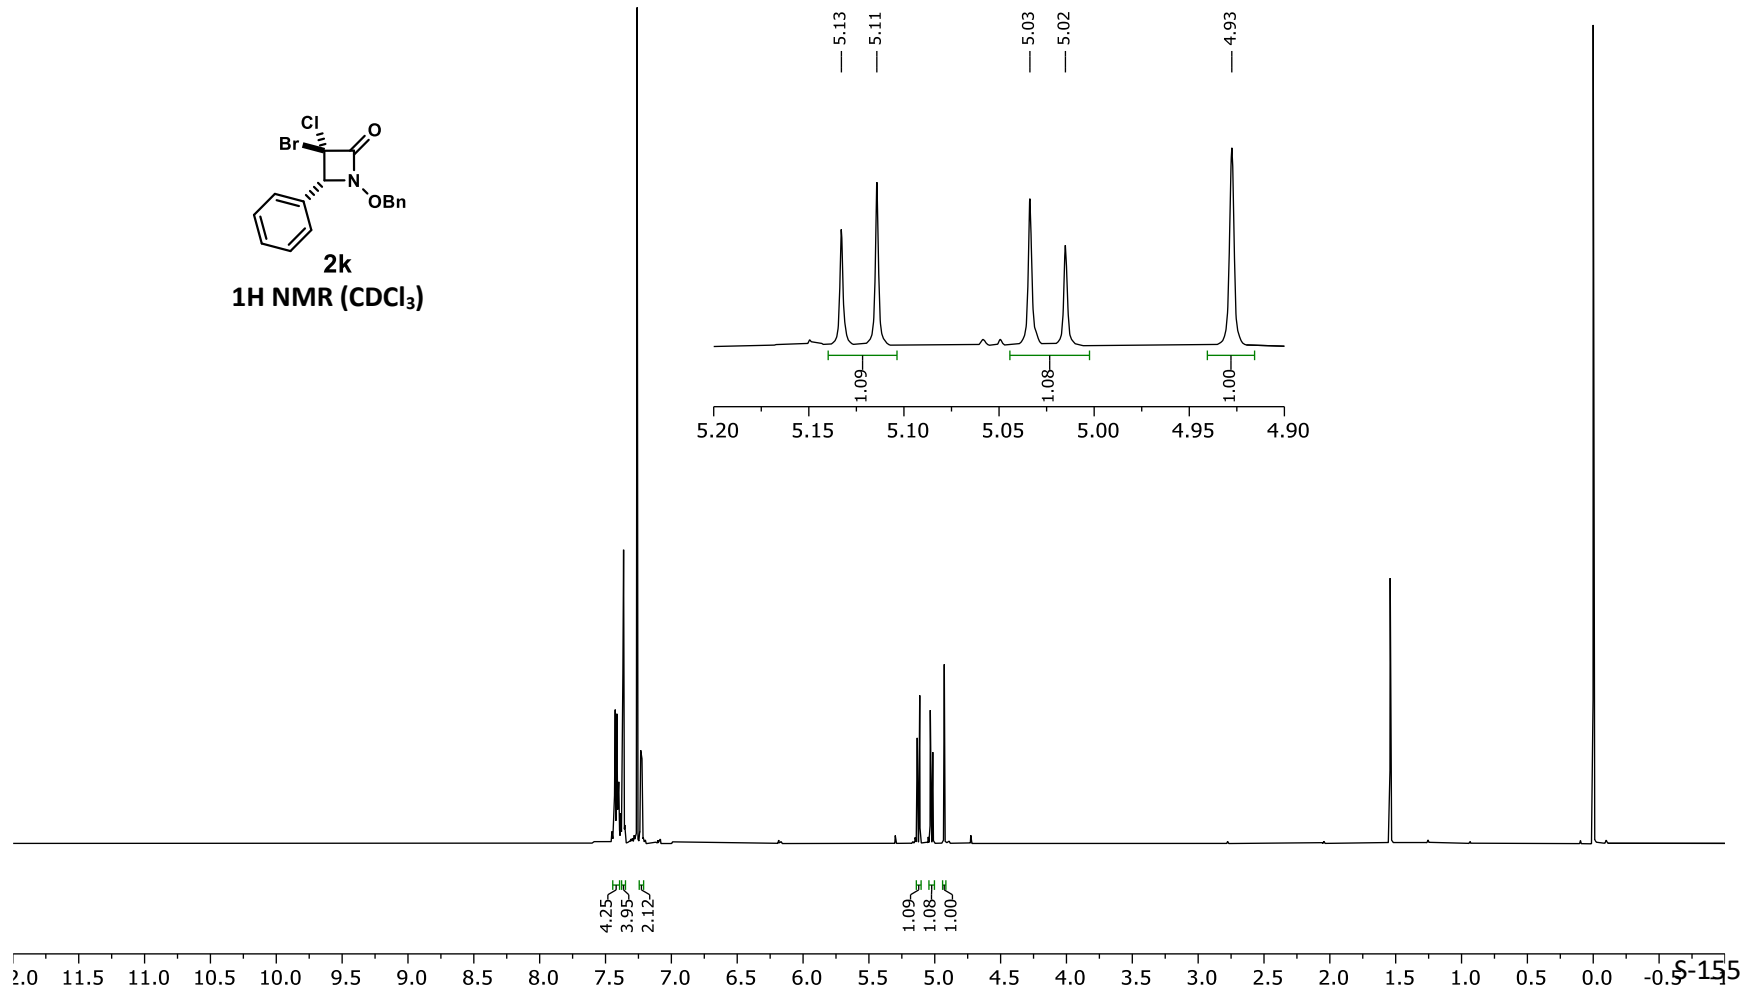

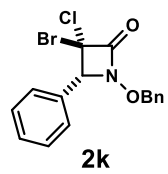

**<sup>13</sup>C NMR (CDCl<sub>3</sub>)**

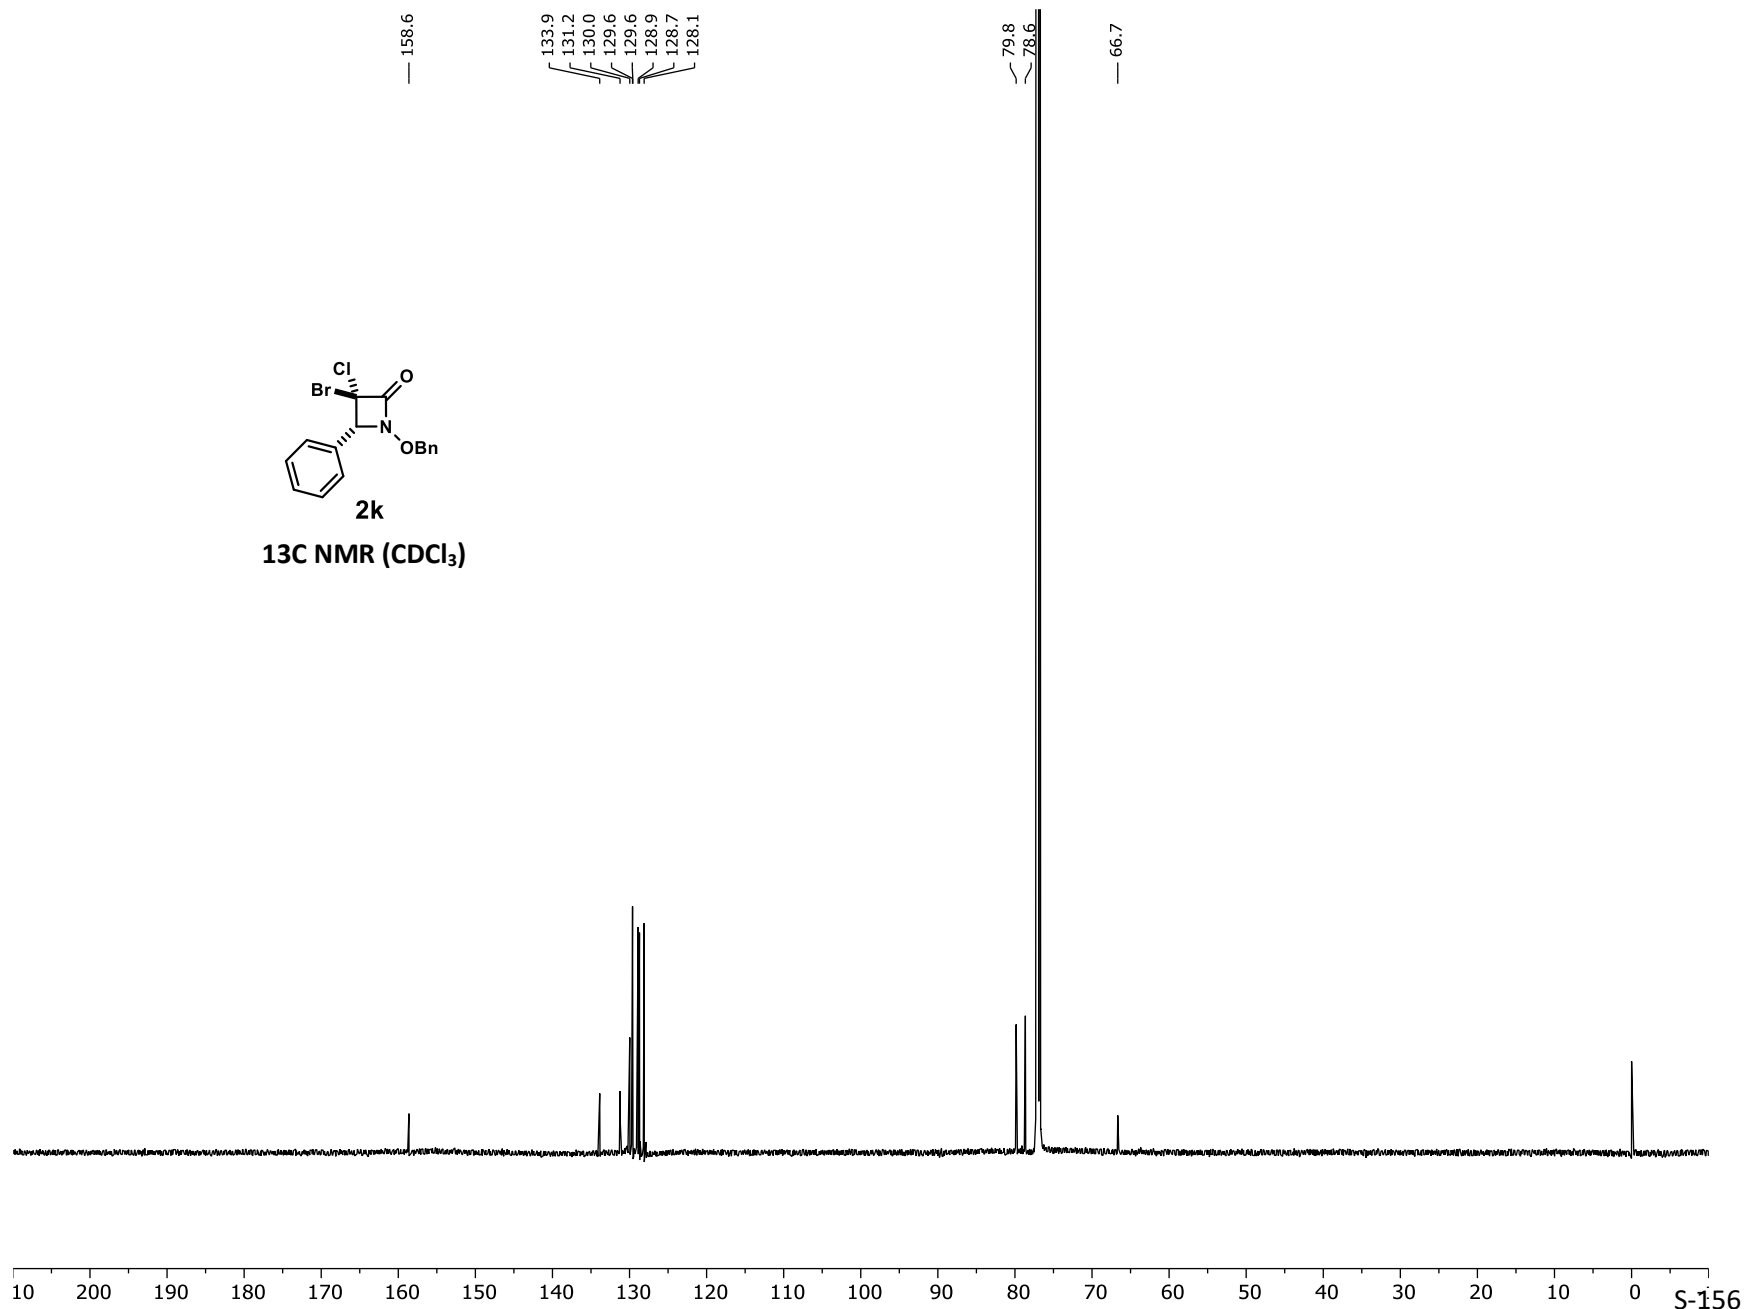



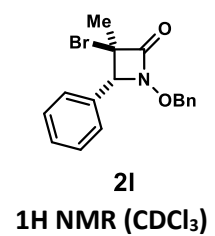

7.40  
 7.39  
 7.39  
 7.39  
 7.38  
 7.38  
 7.37  
 7.37  
 7.36  
 7.35  
 7.35  
 7.35  
 7.35  
 7.22  
 7.22  
 7.21  
 7.21  
 7.21  
 7.20  
 7.20  
 7.20  
 5.11  
 5.09  
 5.05  
 5.03  
 4.84  
 1.35

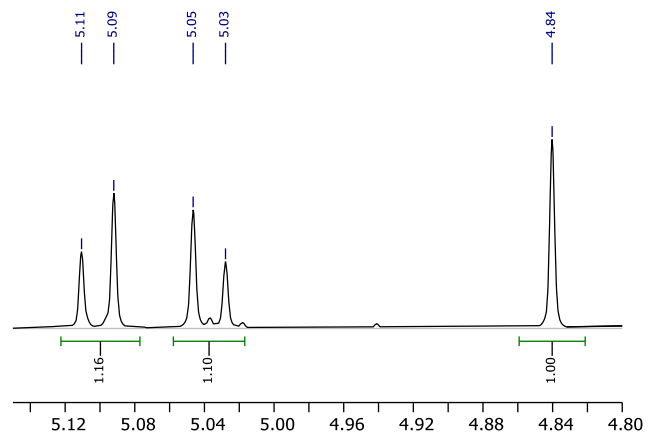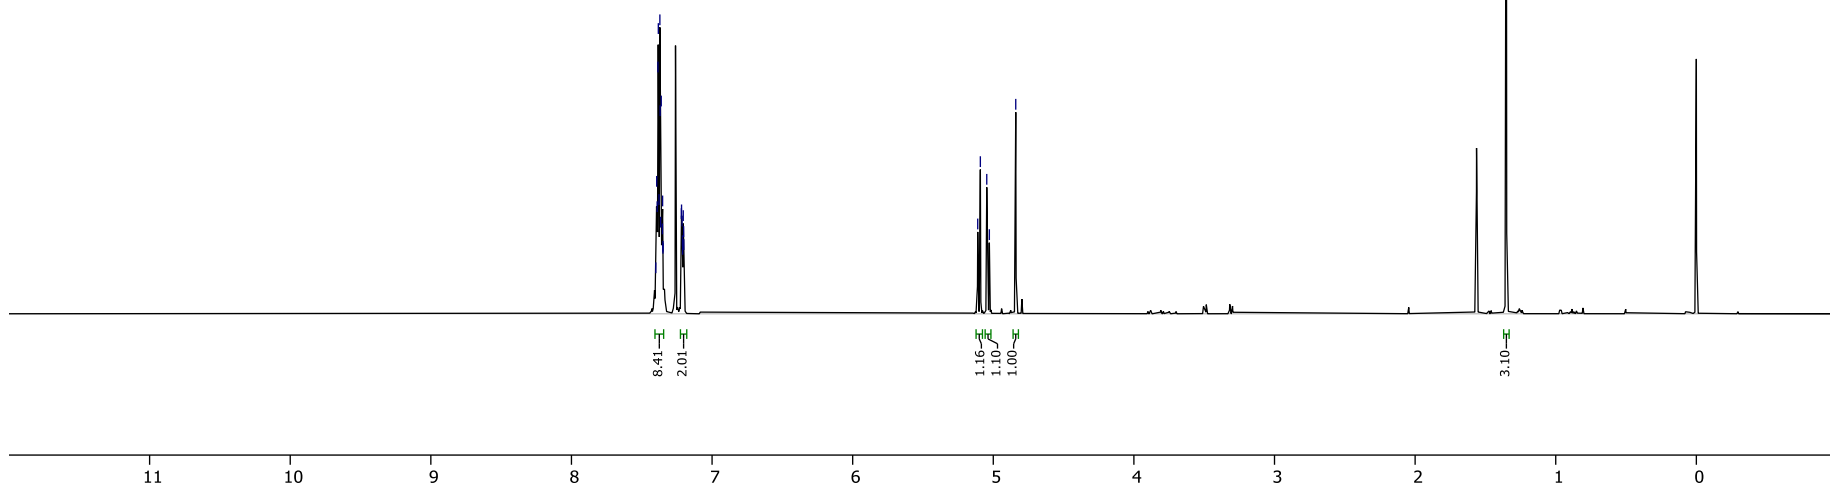

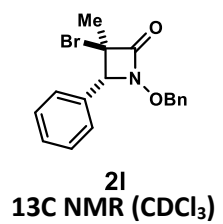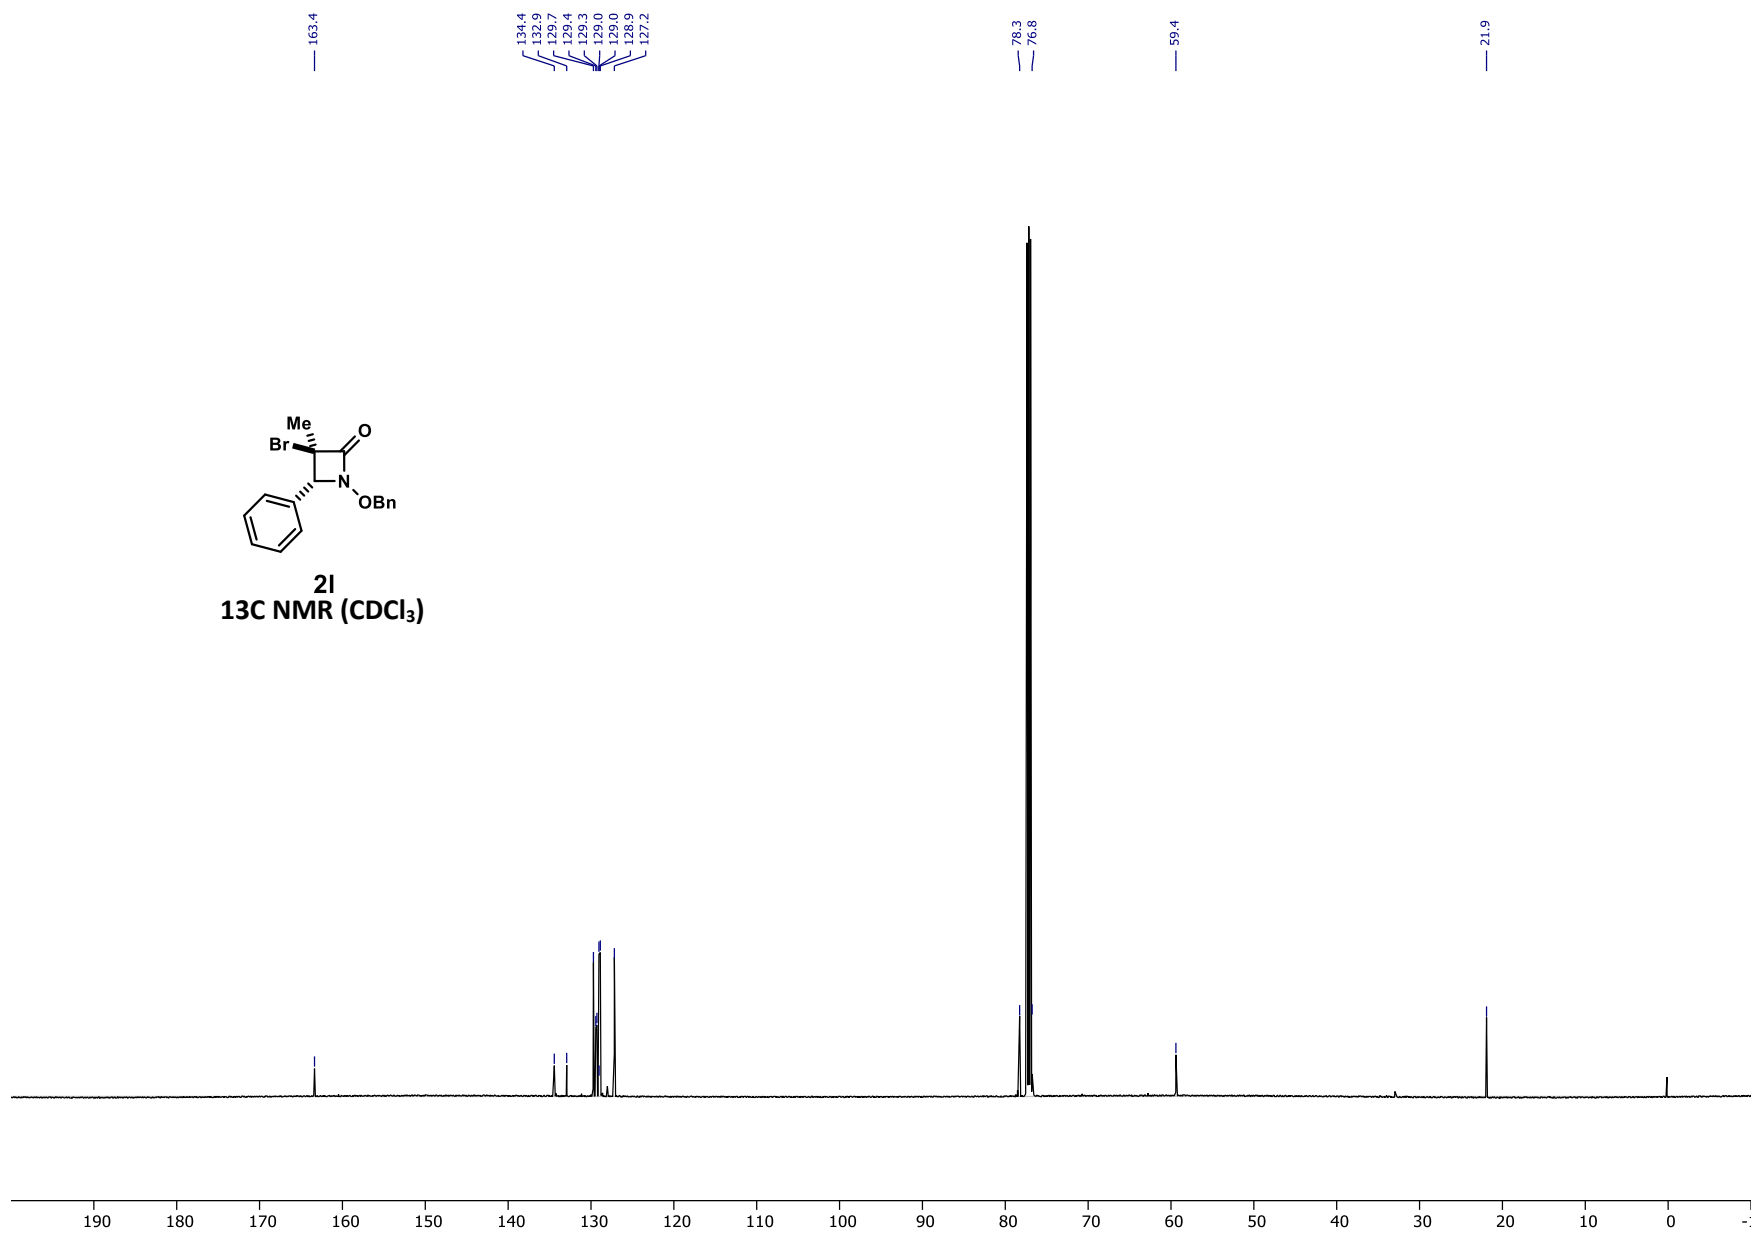



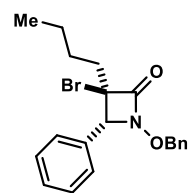

2m  
13C NMR (CDCl<sub>3</sub>)

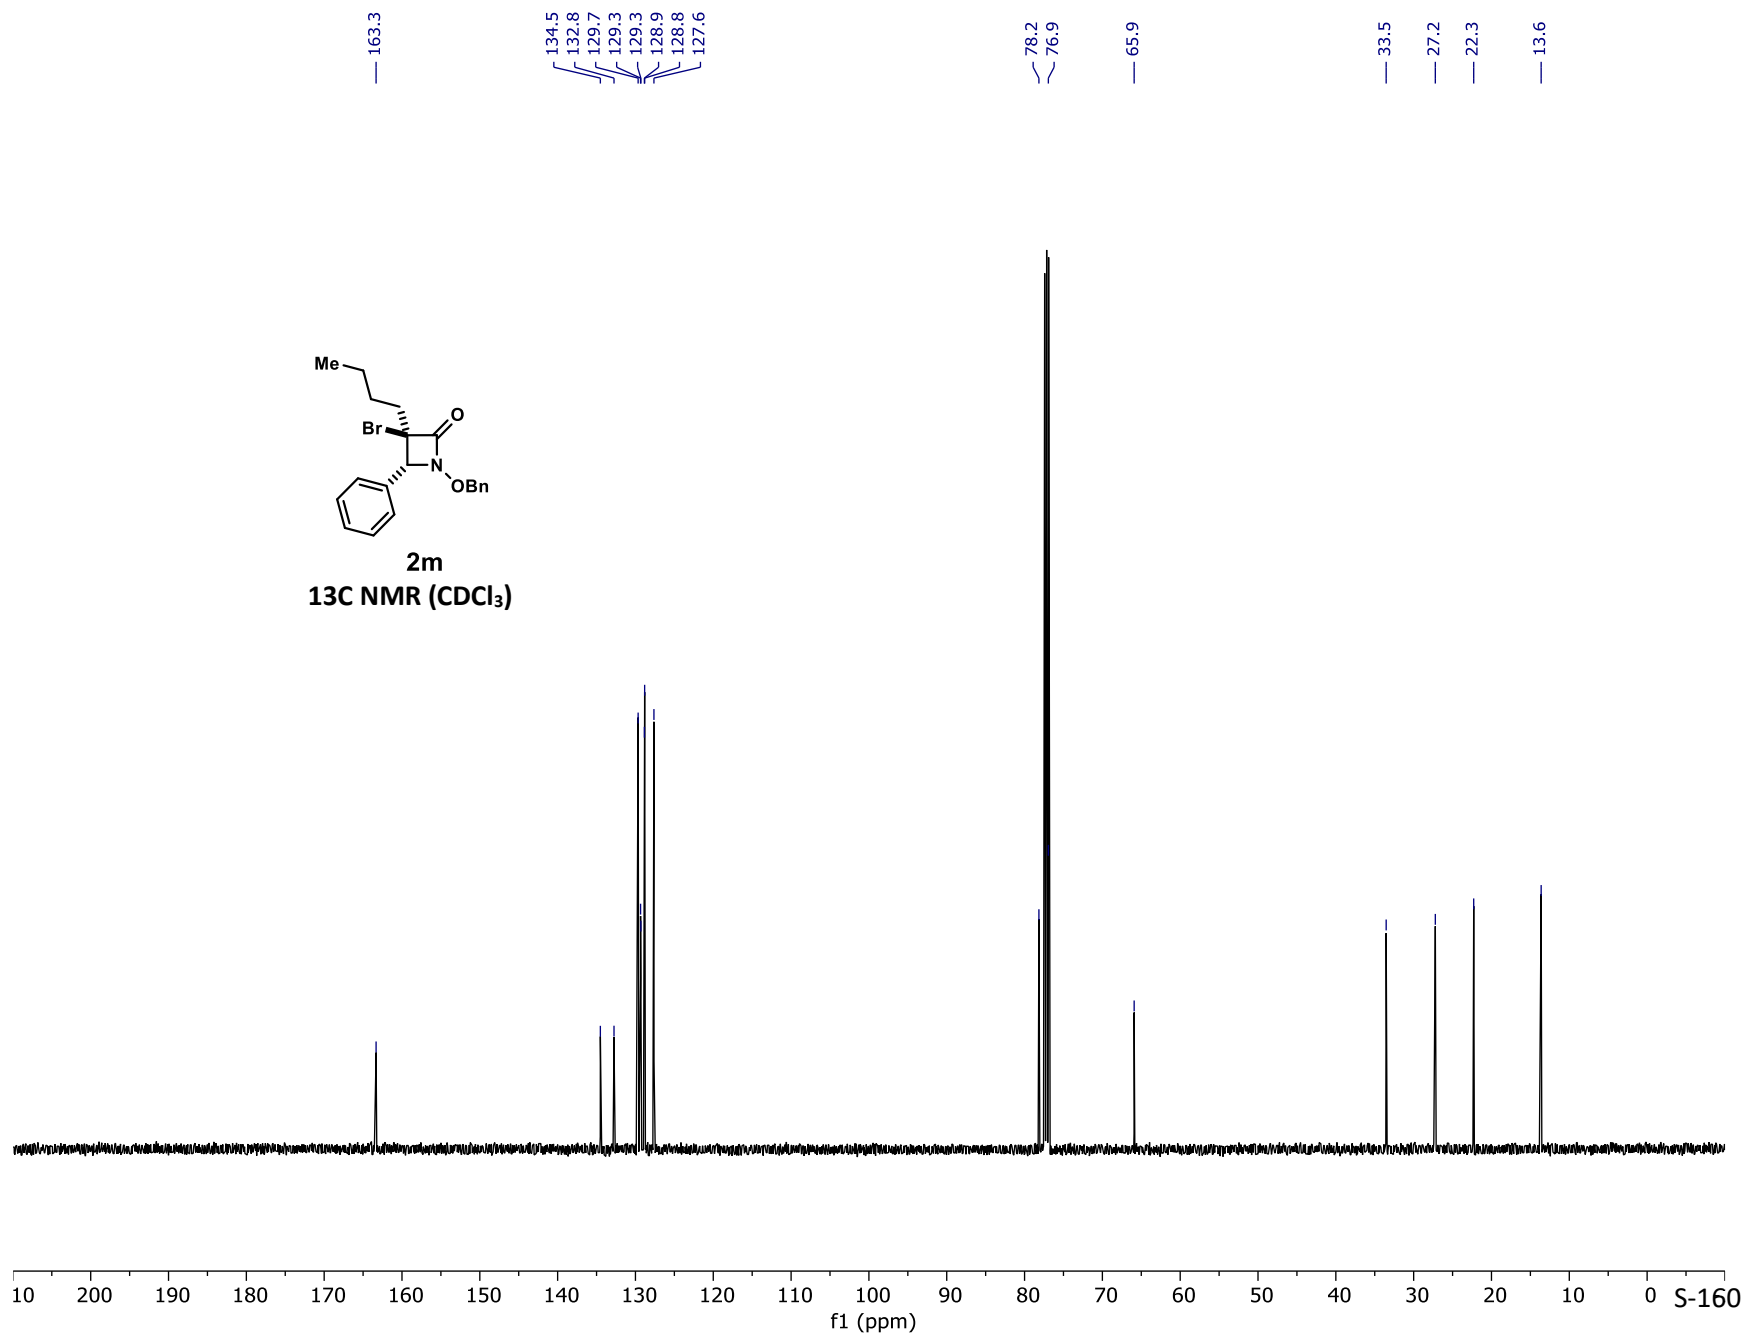

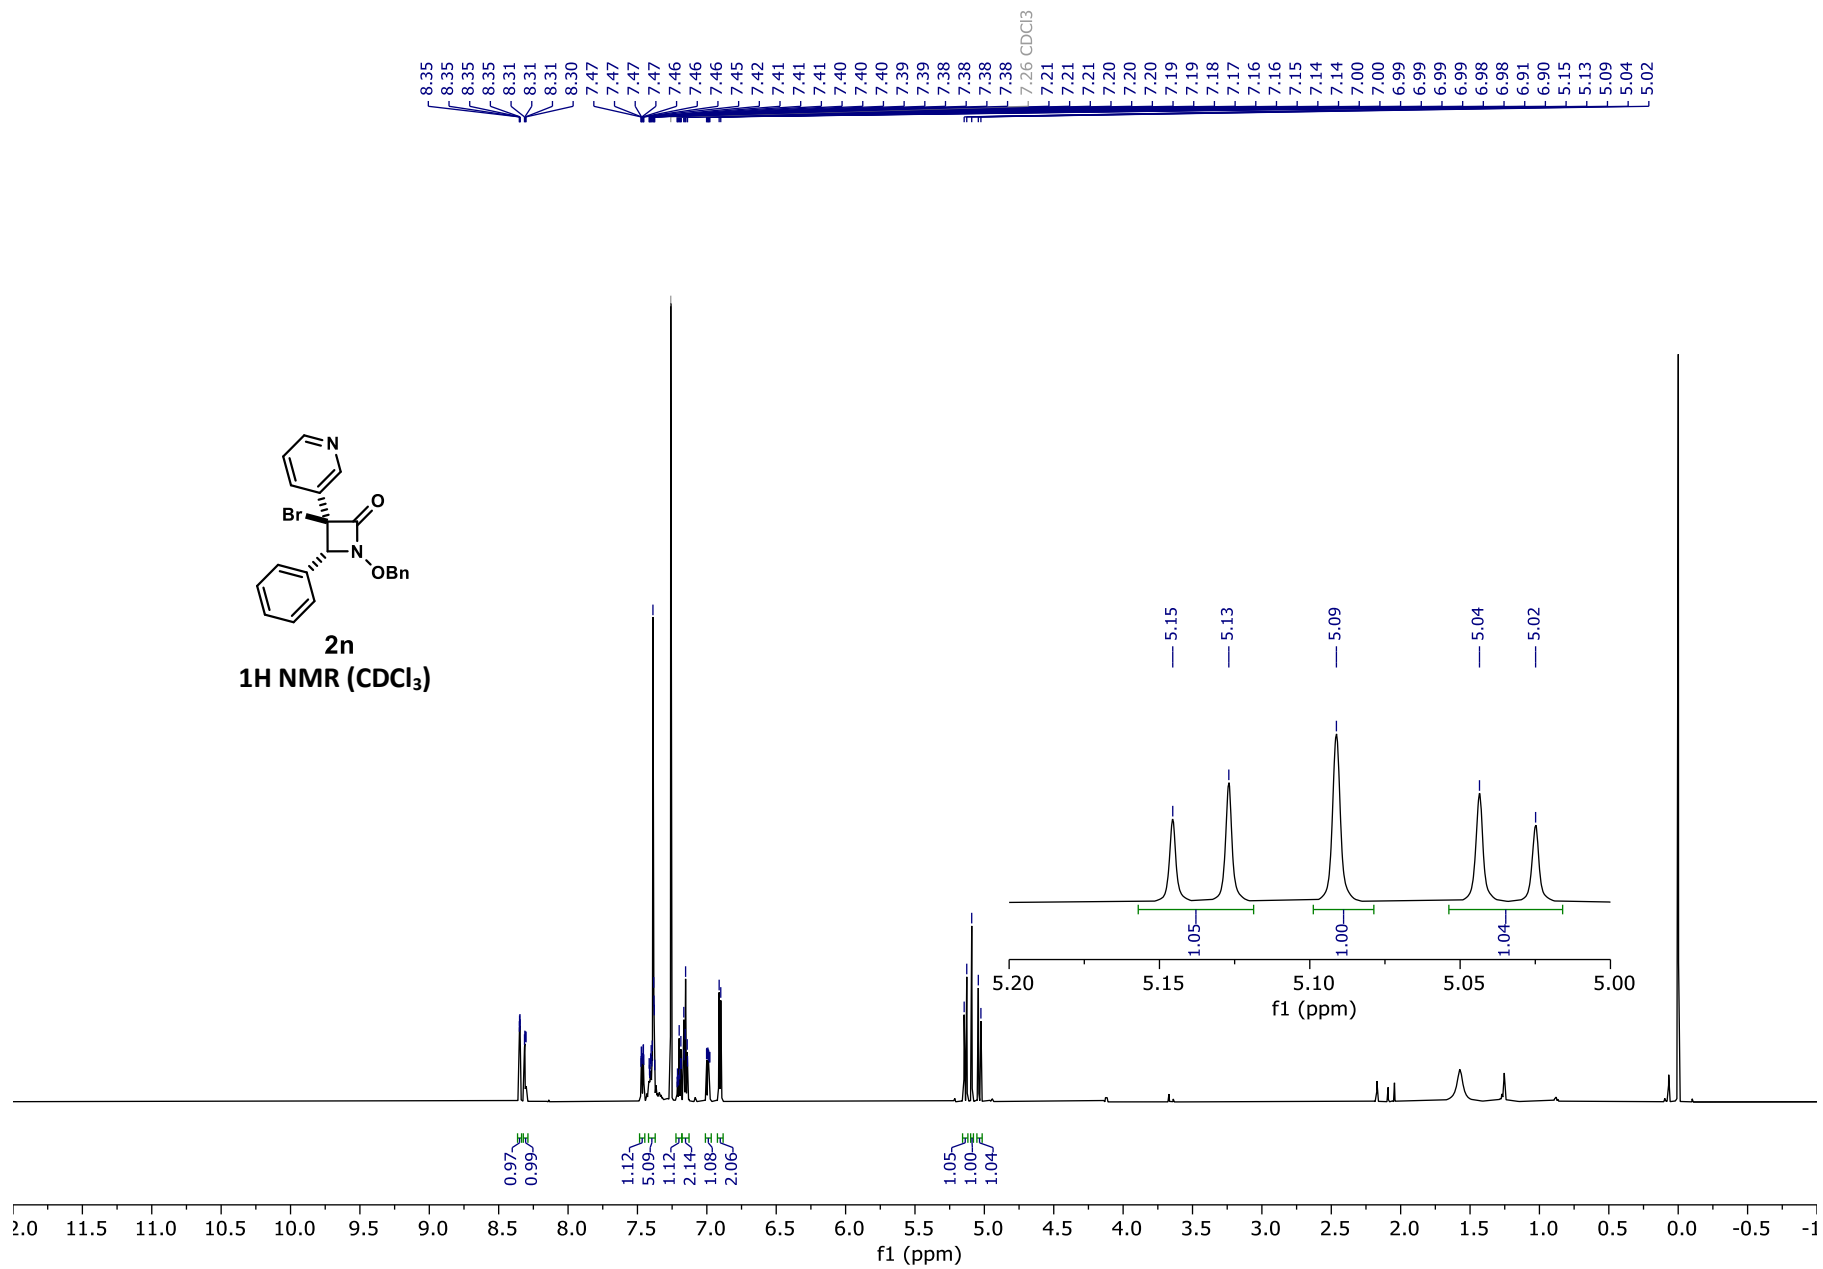

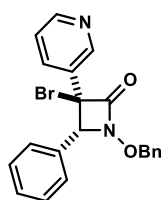

2n

<sup>13</sup>C NMR (CDCl<sub>3</sub>)

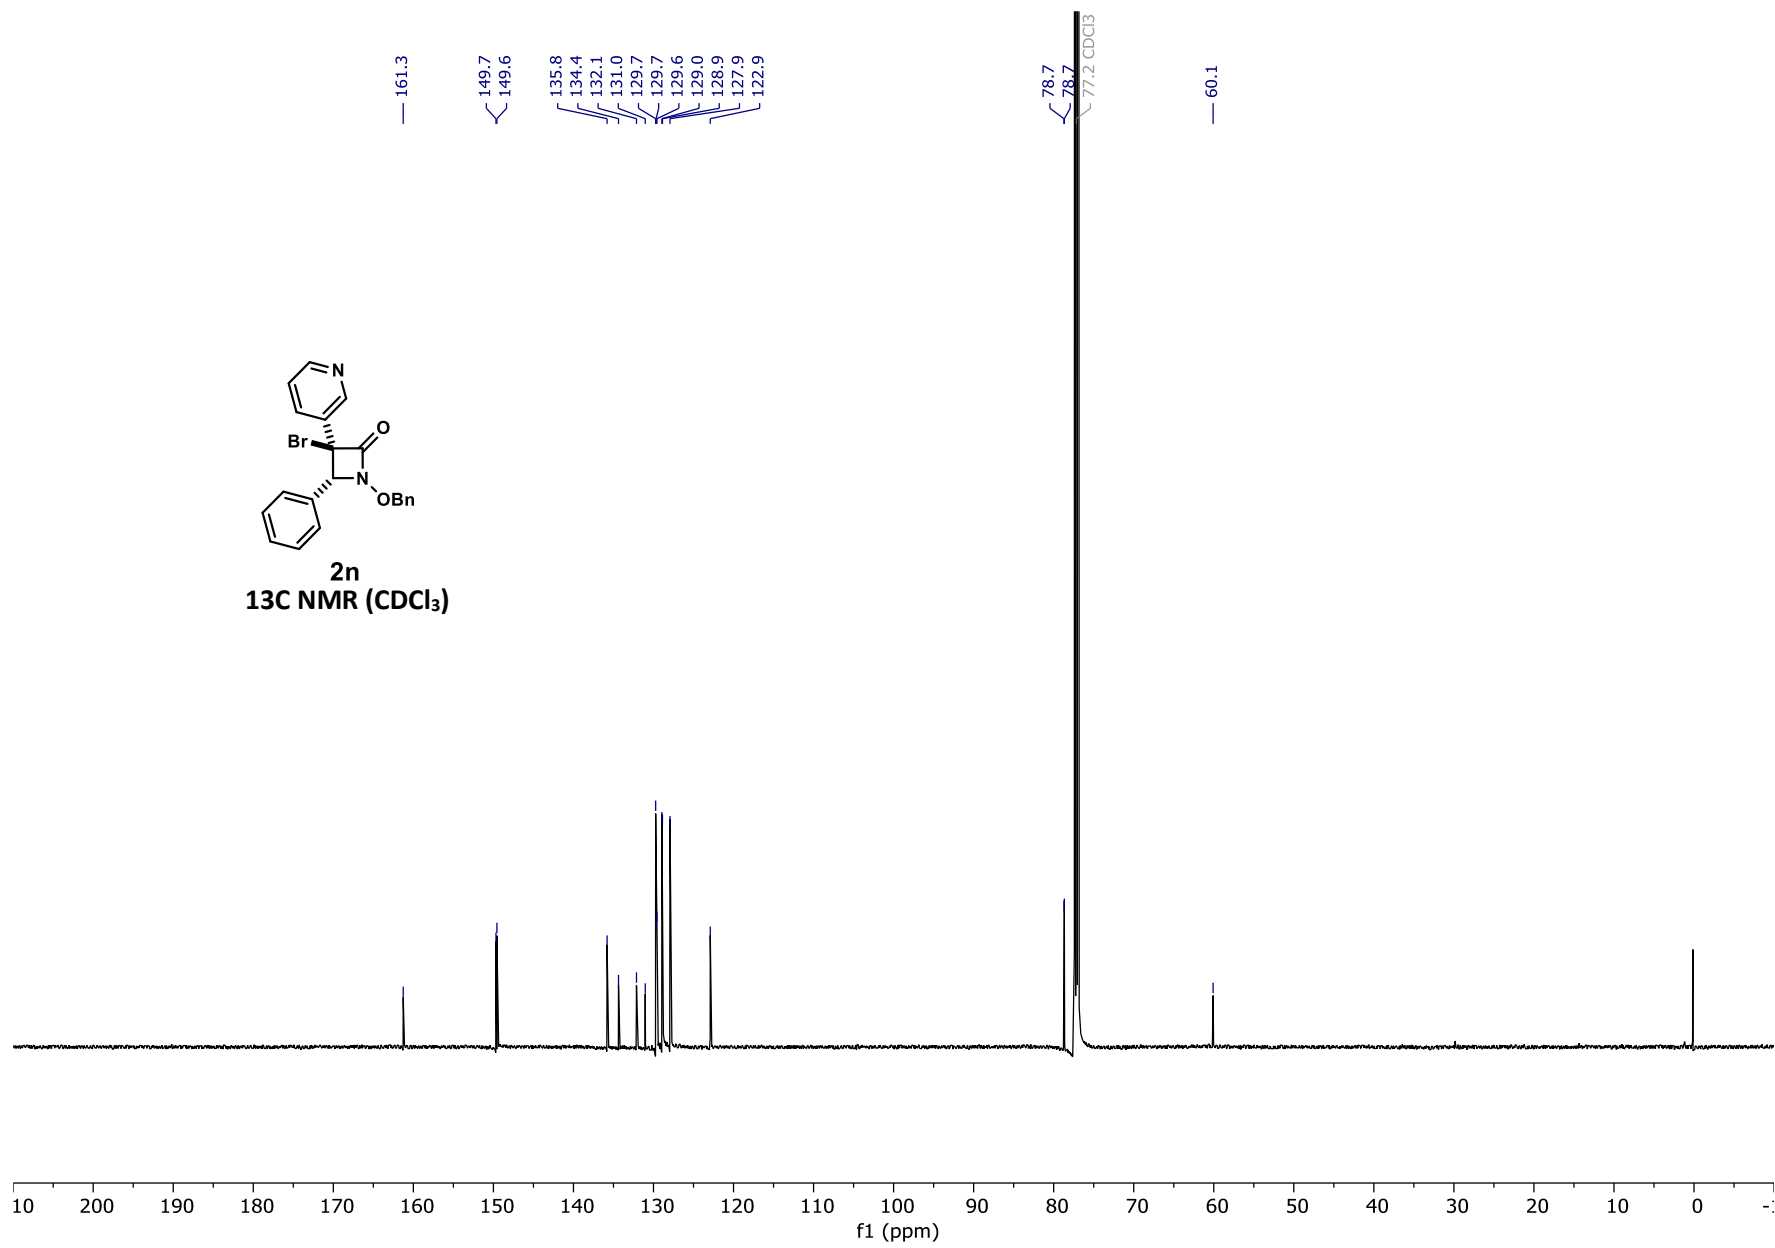

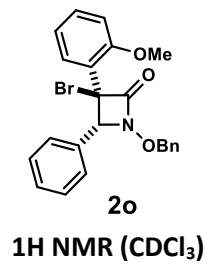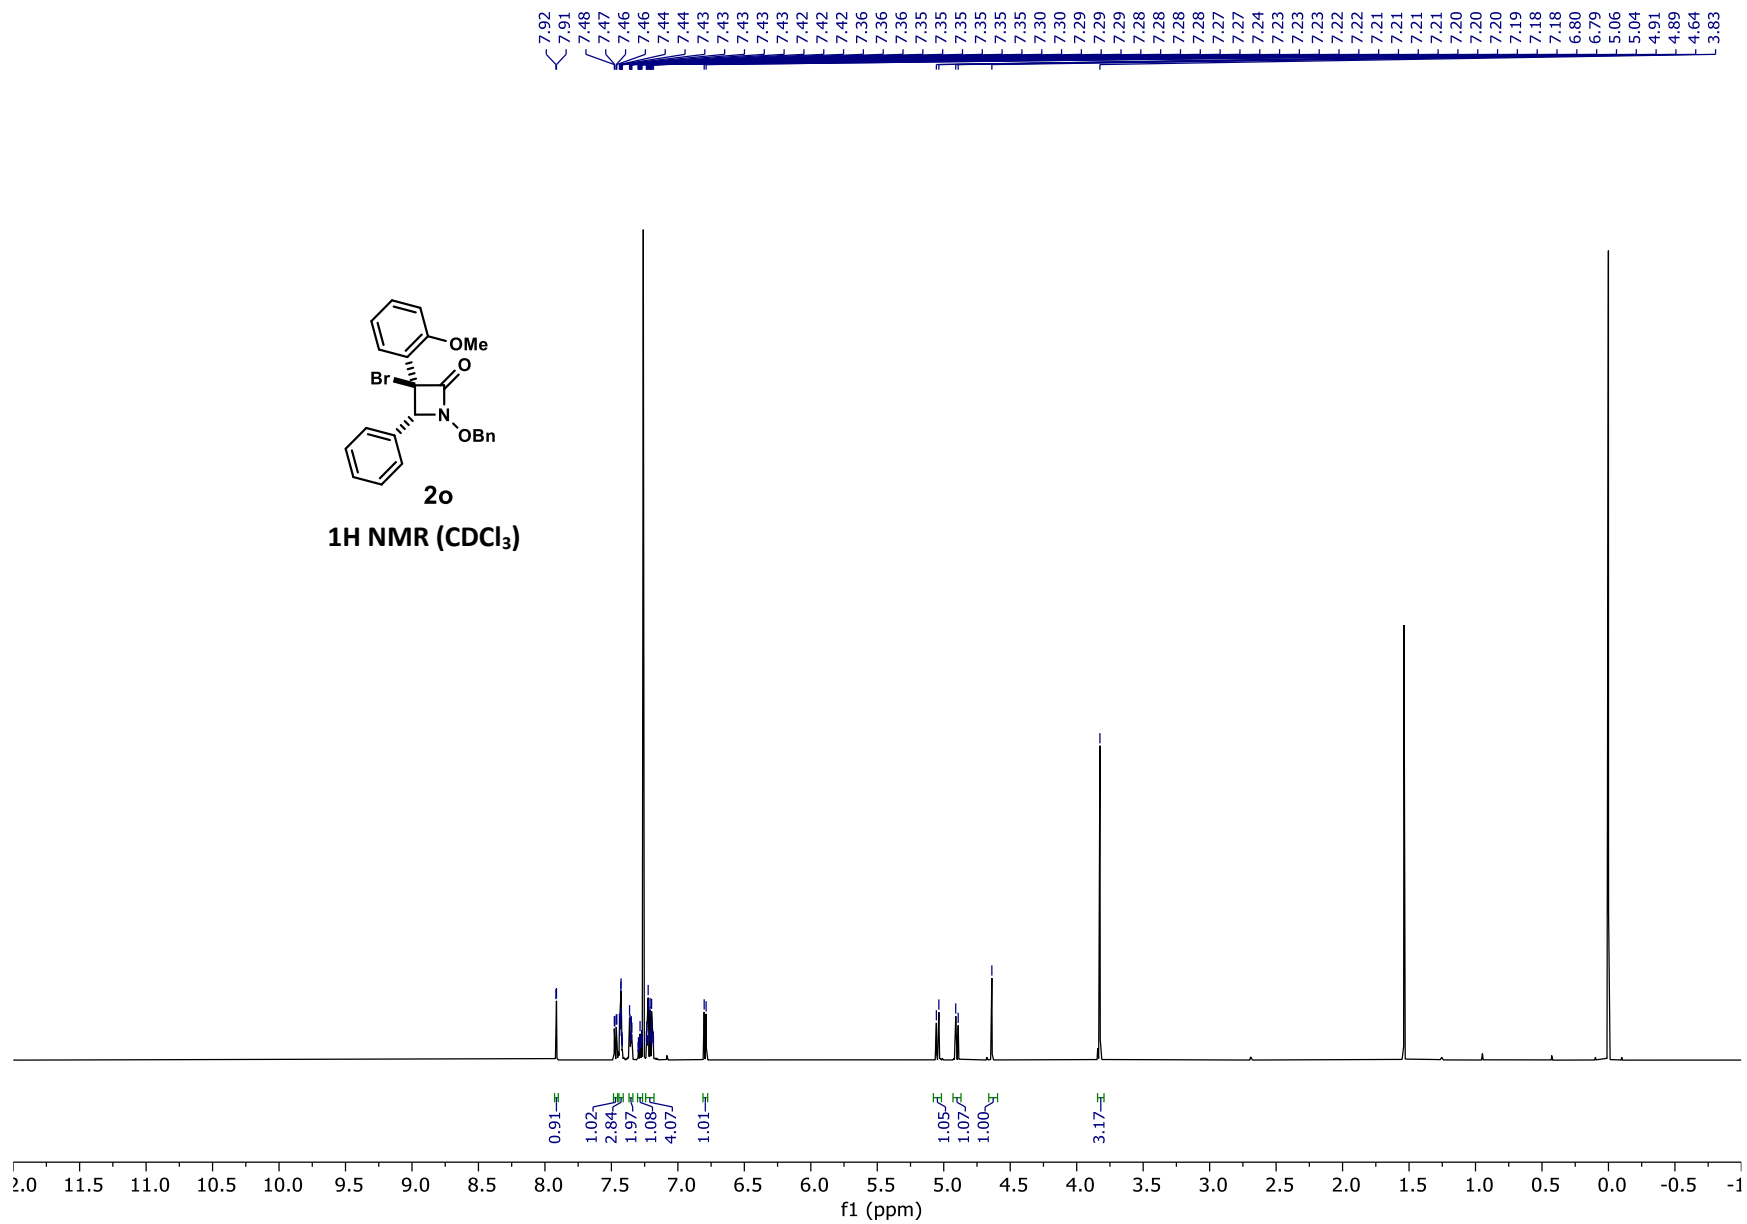

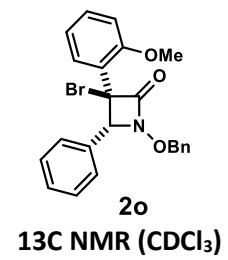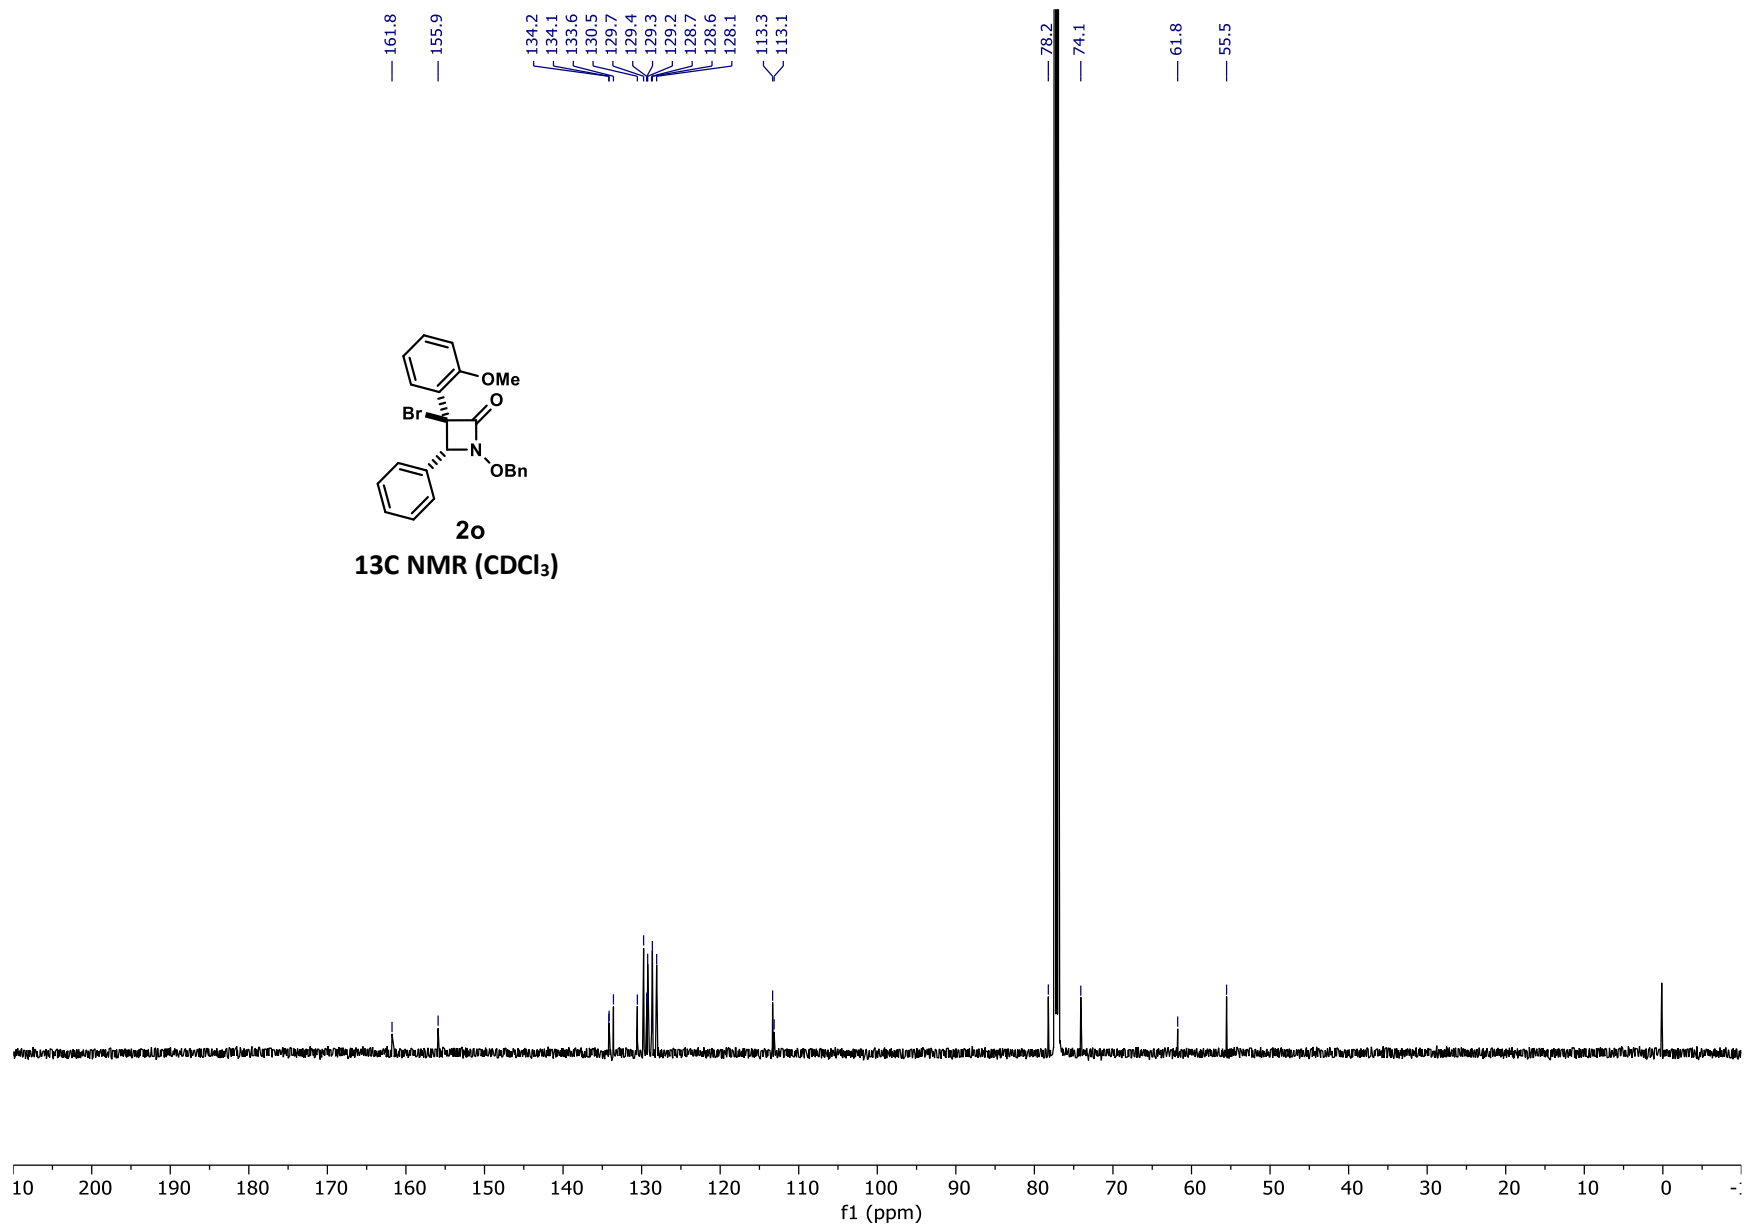



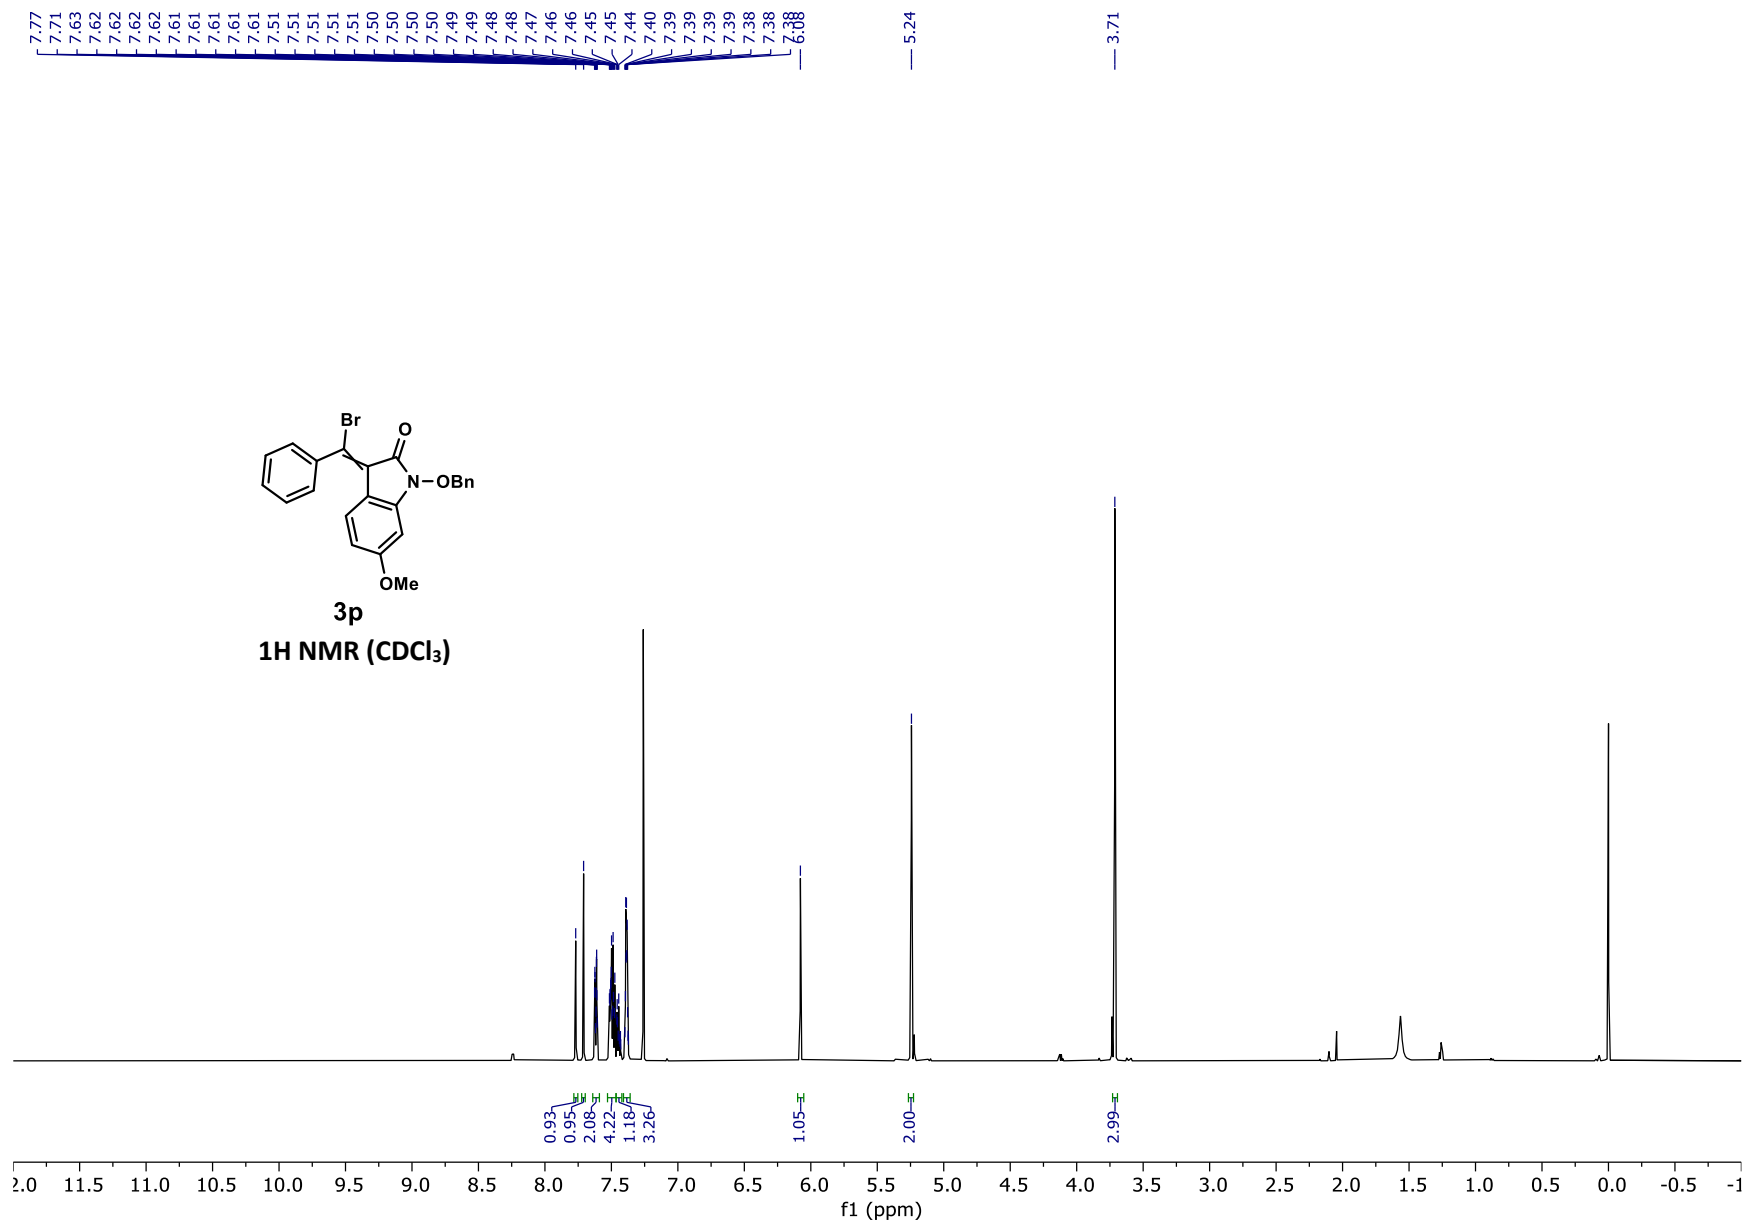

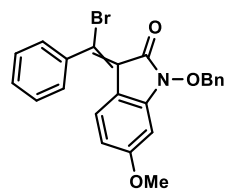

3p

<sup>13</sup>C NMR (CDCl<sub>3</sub>)

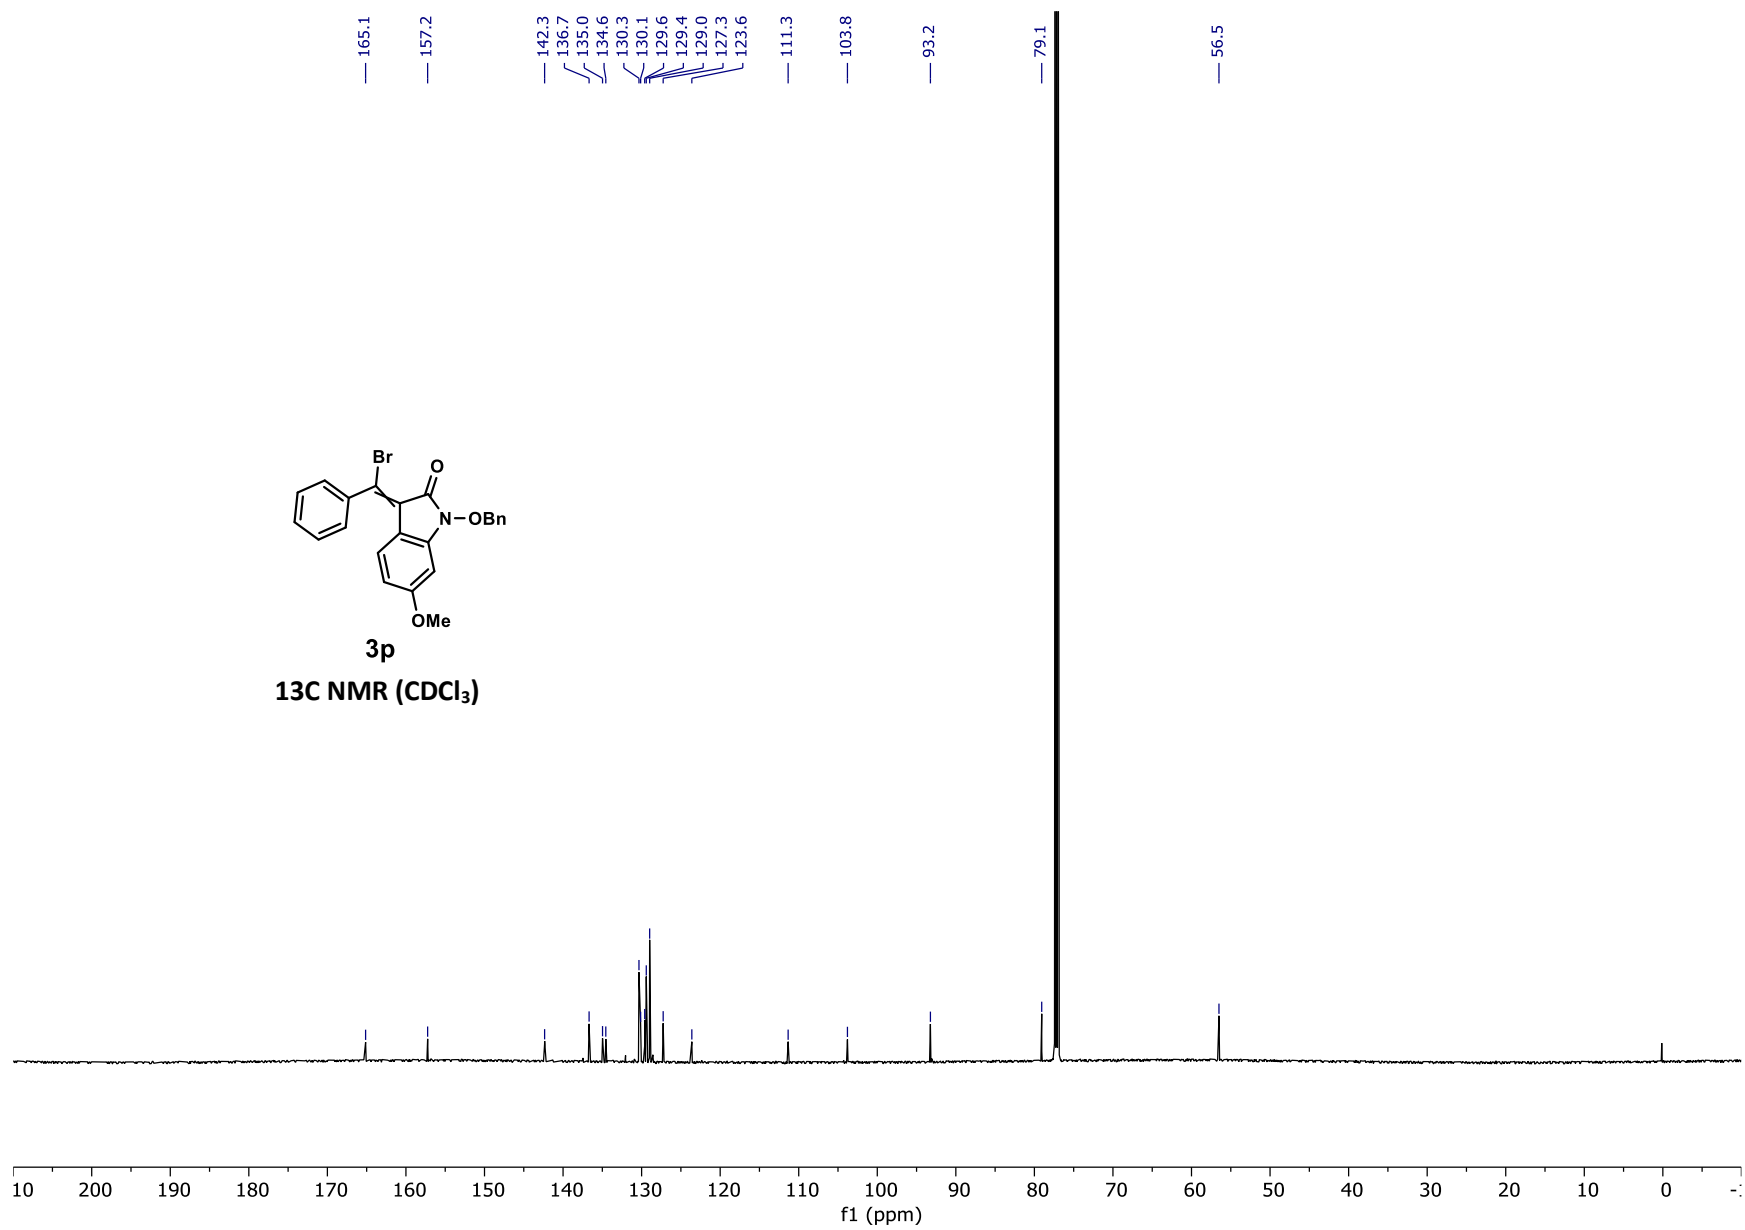

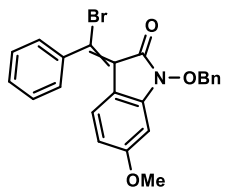

3p  
NOESY

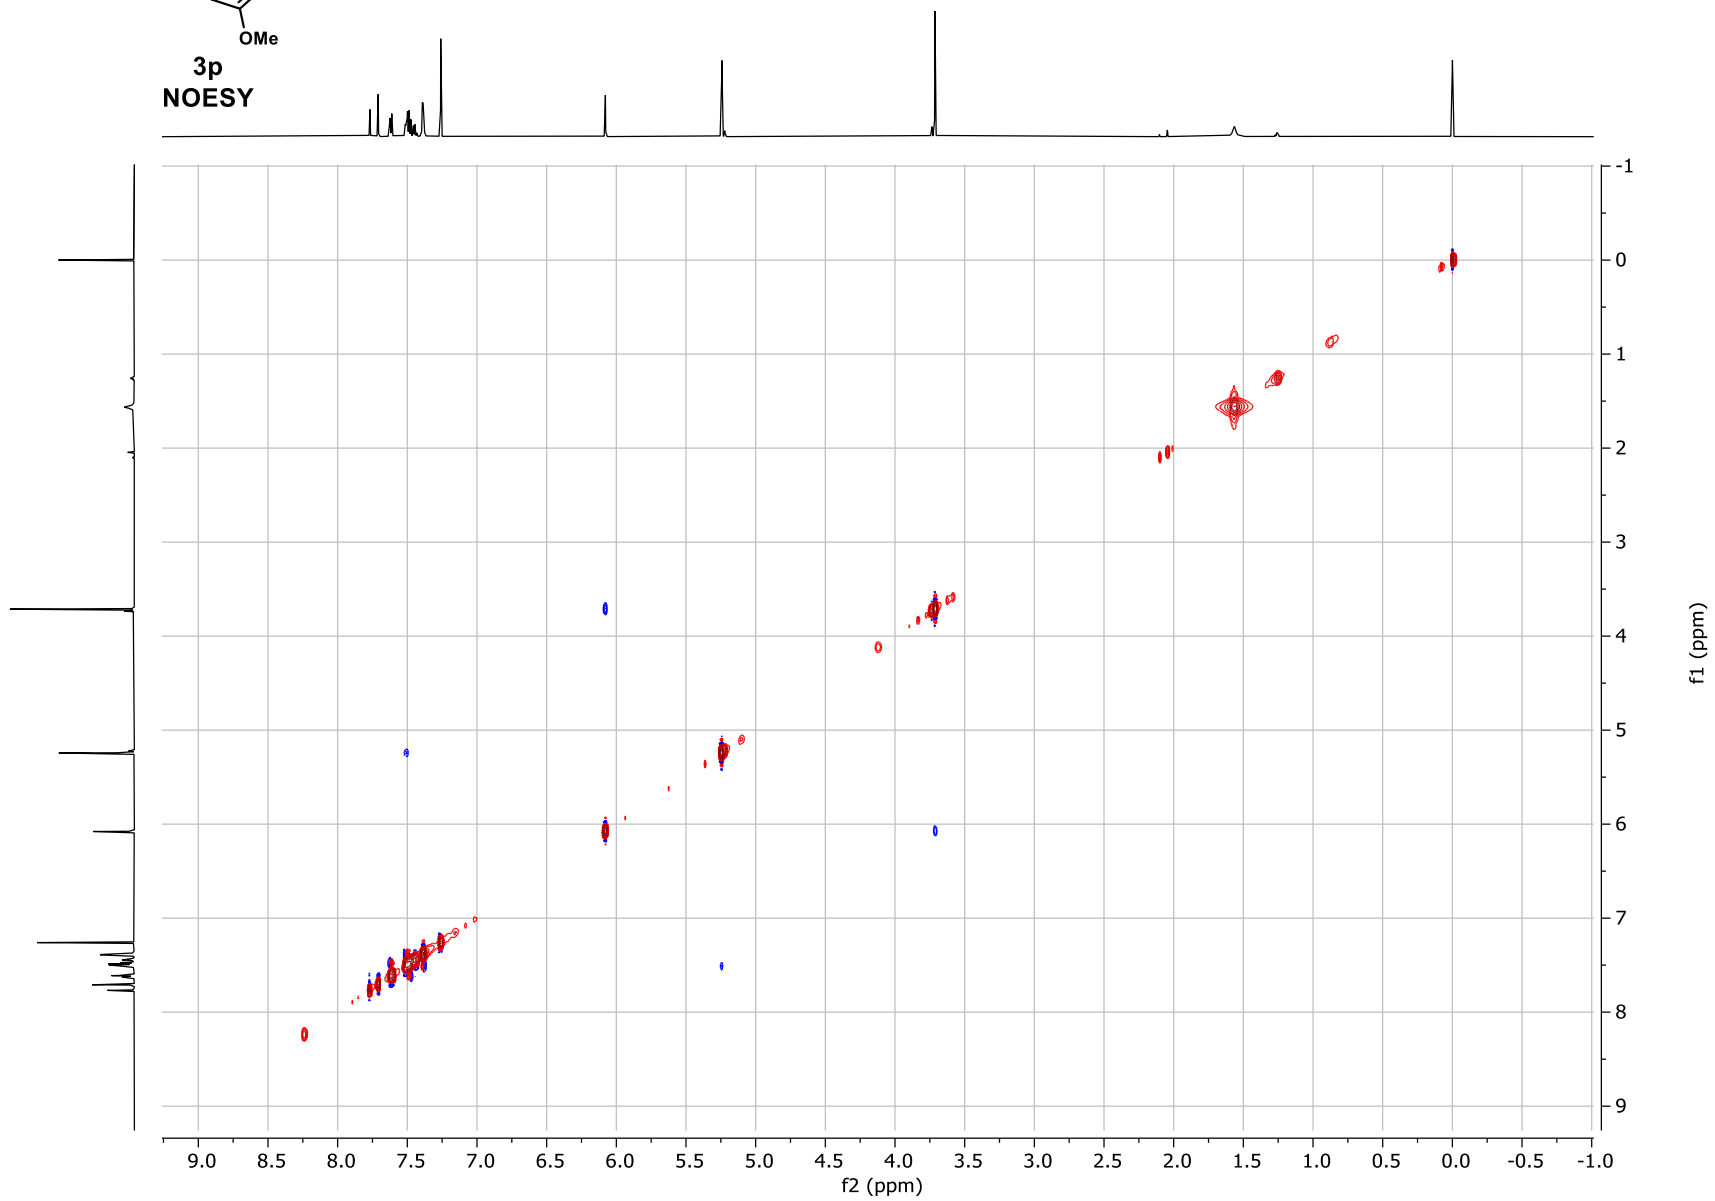

7.40  
7.40  
7.39  
7.39  
7.39  
7.38  
7.37  
7.37  
7.19  
7.18  
7.17  
7.17  
7.17  
7.16  
7.15  
7.15  
7.14  
7.14  
7.13  
7.12  
7.12  
7.11  
7.11  
7.08  
7.07  
7.07  
7.06  
7.06  
7.05  
7.05  
7.04  
7.04  
7.03  
6.91  
6.90  
6.89  
6.89  
5.13  
5.11  
5.10  
5.02  
5.00

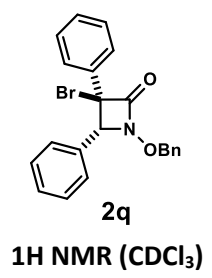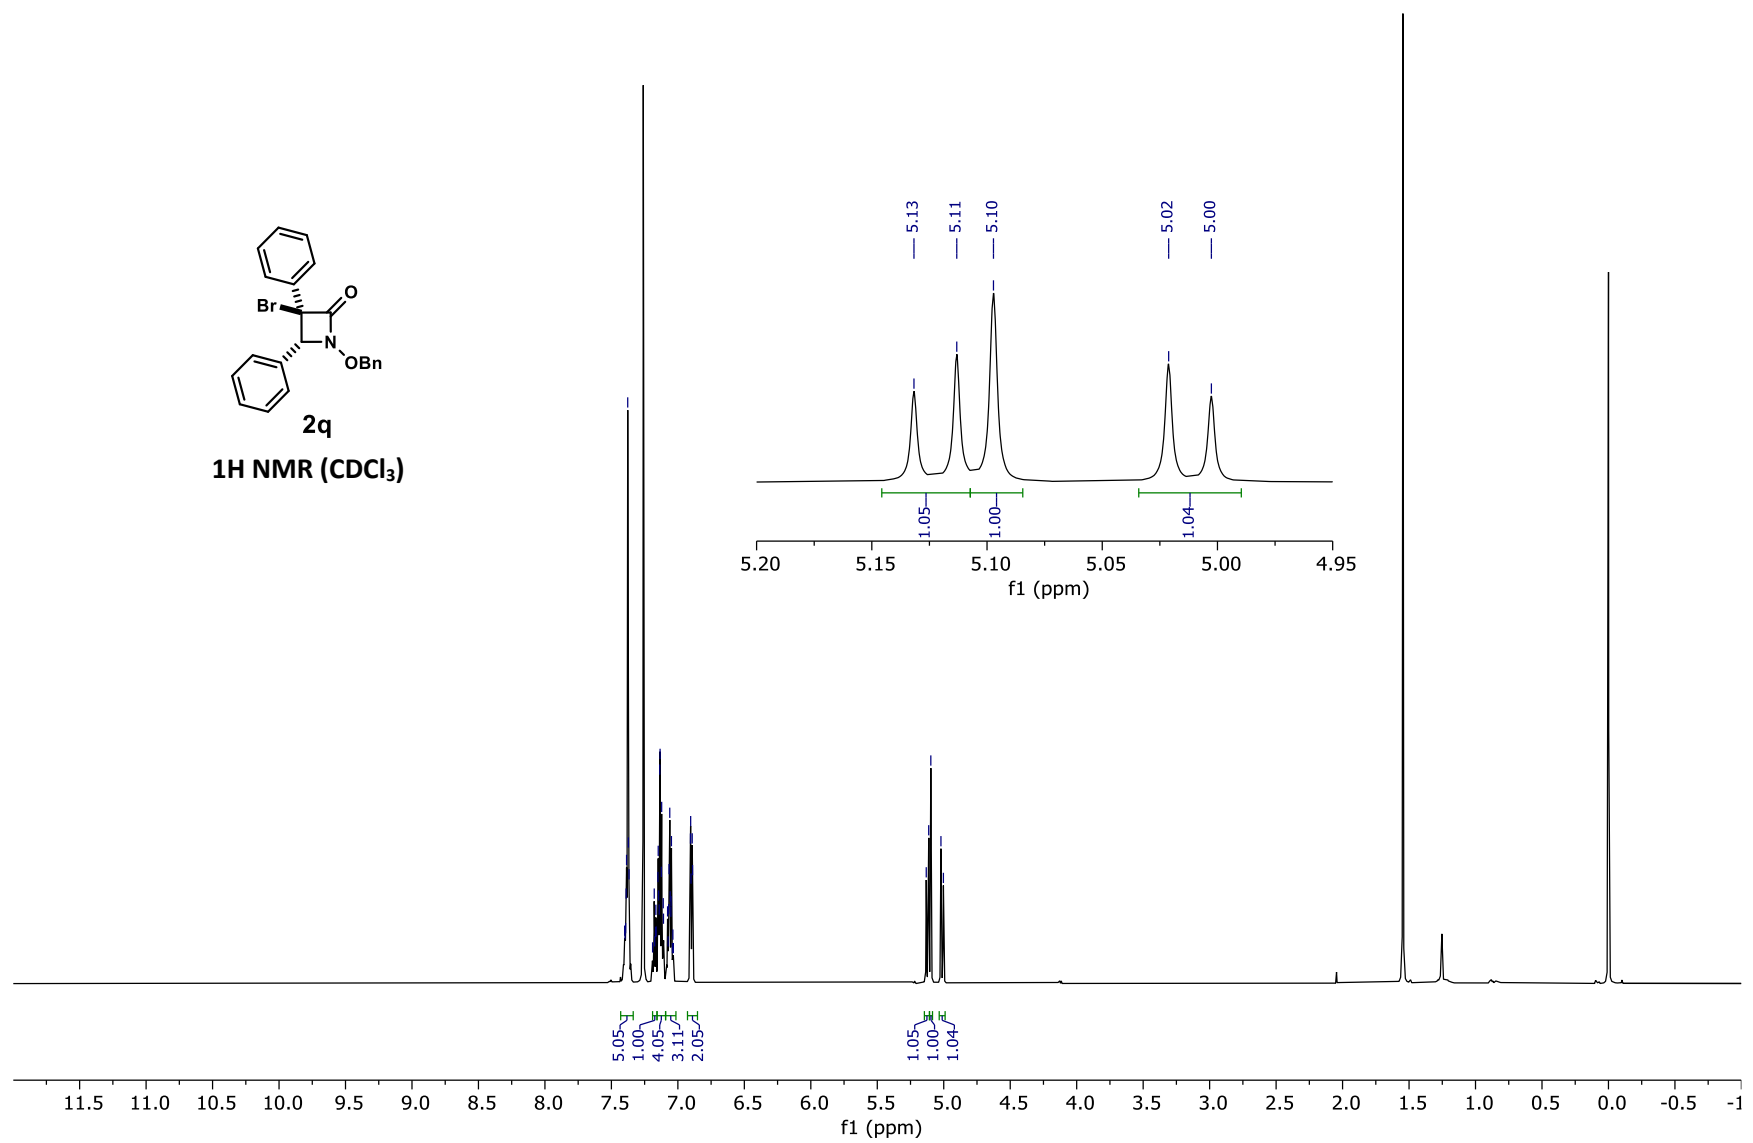

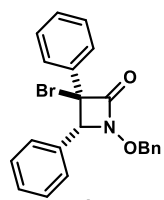

2q

$^{13}\text{C}$  NMR ( $\text{CDCl}_3$ )

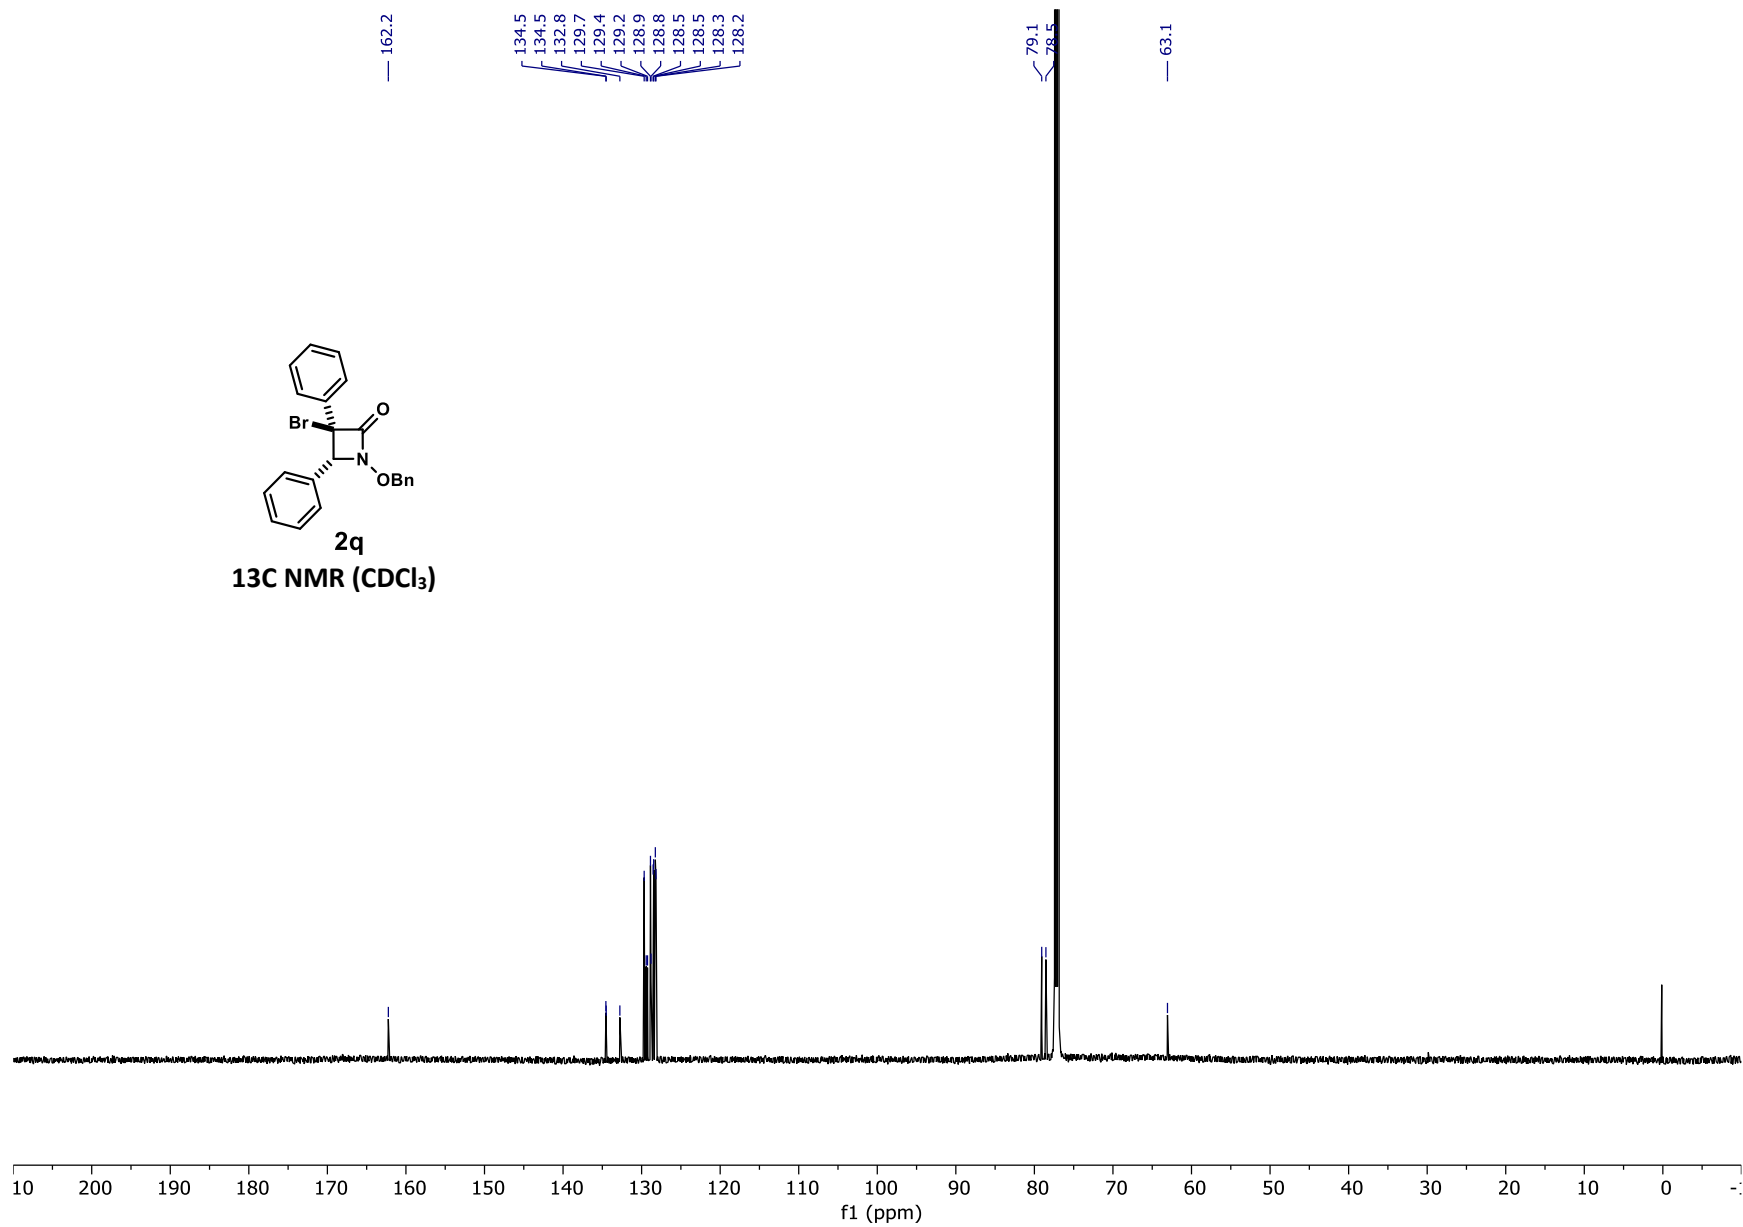

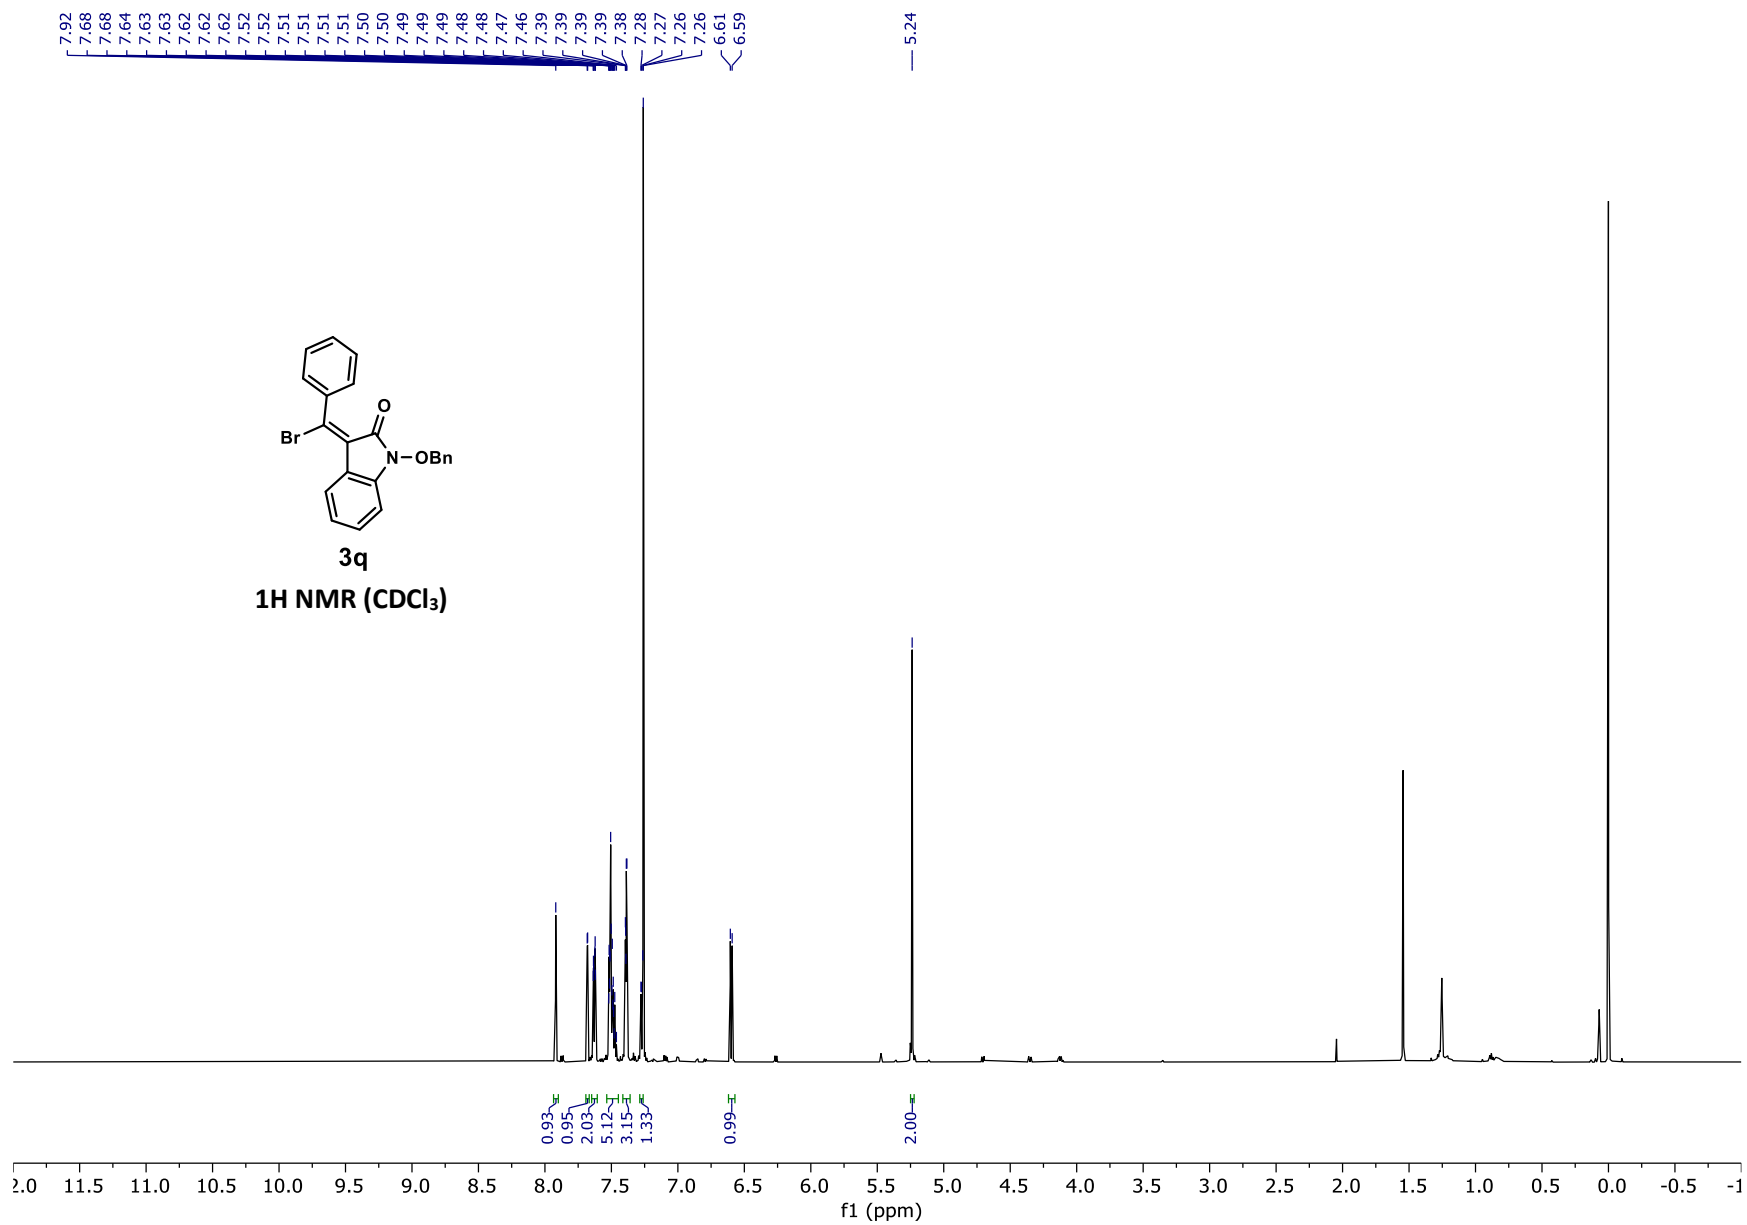

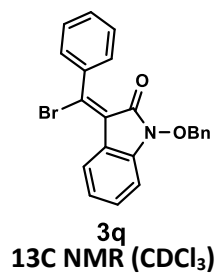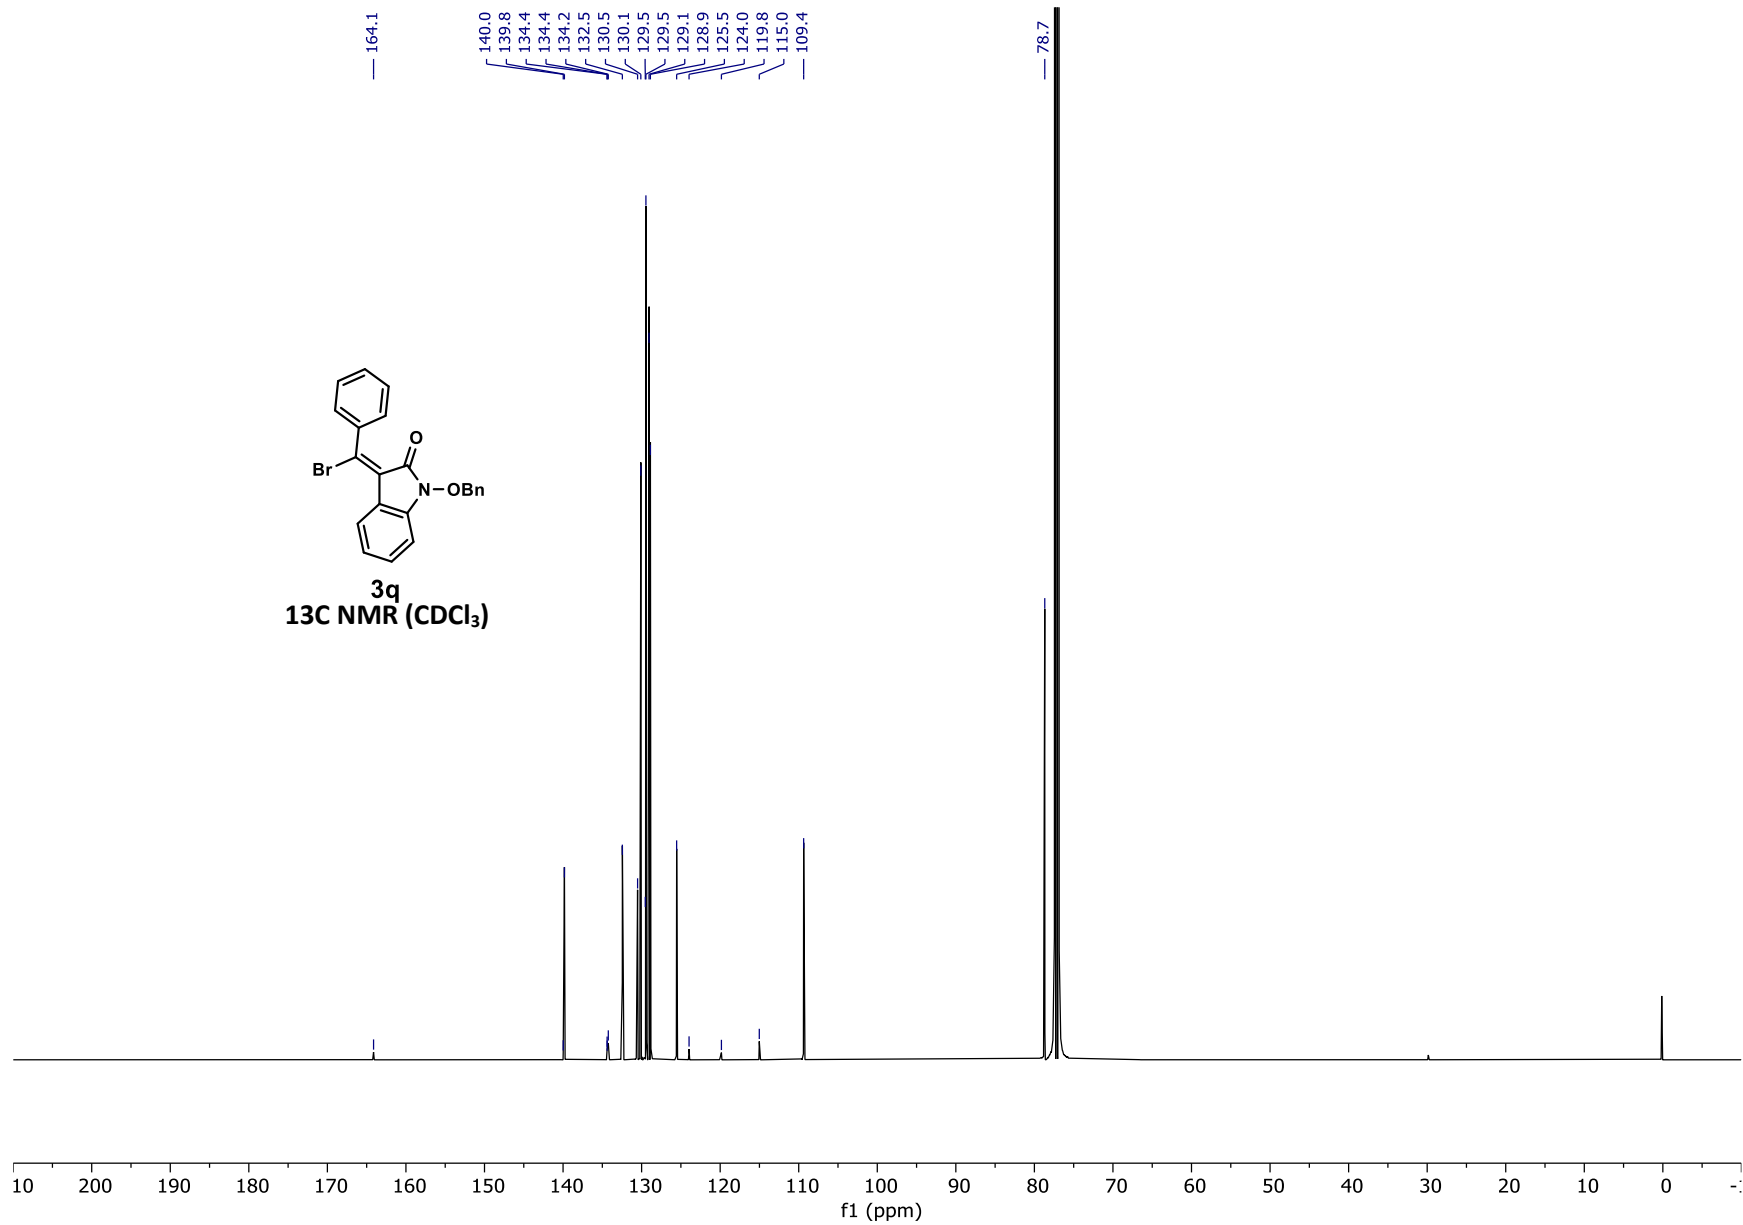

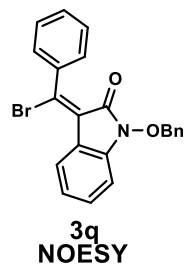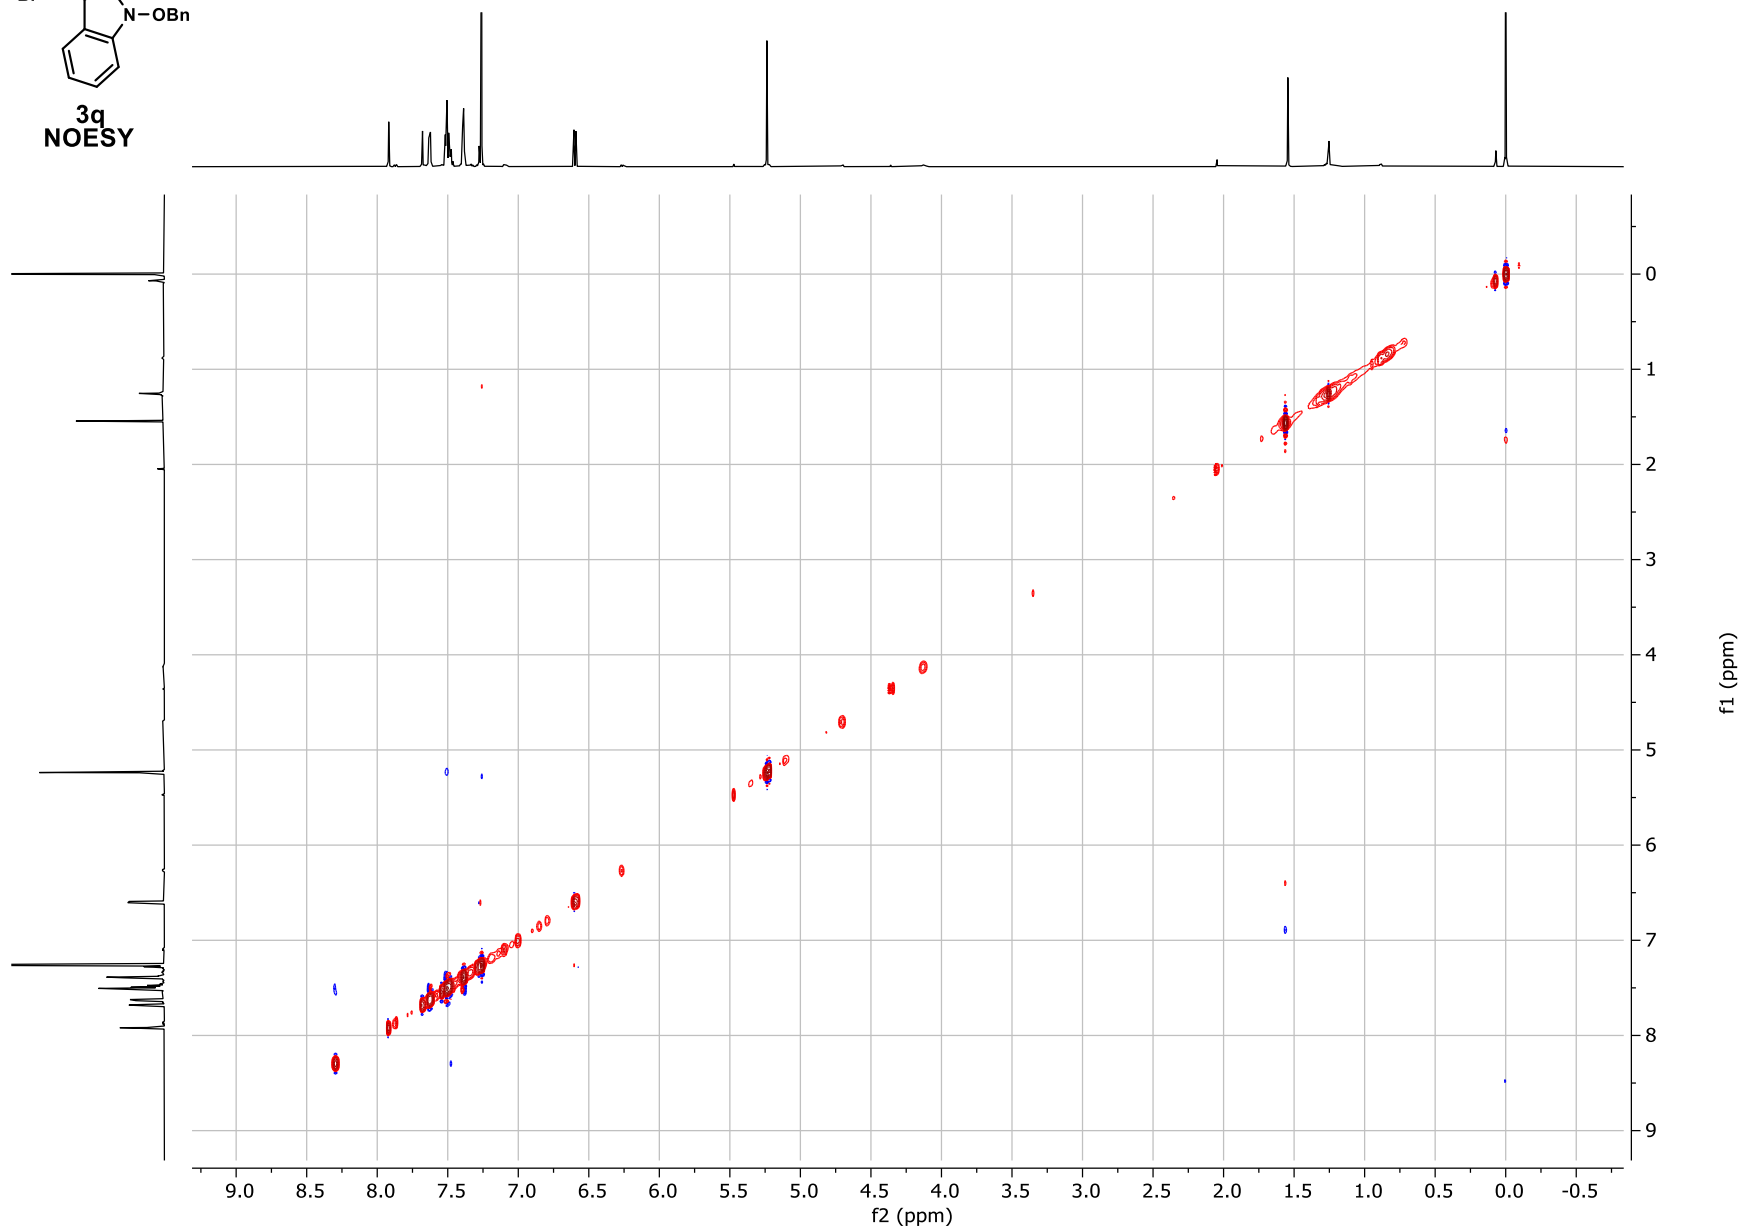



7.91  
7.90  
7.43  
7.42  
7.42  
7.42  
7.41  
7.40  
7.39  
7.38  
7.32  
7.31  
7.23  
7.23  
7.22  
7.22  
7.21  
7.21  
7.20  
7.20  
7.20  
7.17  
7.17  
7.16  
7.15  
7.14  
7.14  
6.90  
6.89  
5.14  
5.13  
5.07  
5.04  
5.03

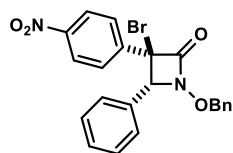

**2r**  
**<sup>1</sup>H NMR (CDCl<sub>3</sub>)**

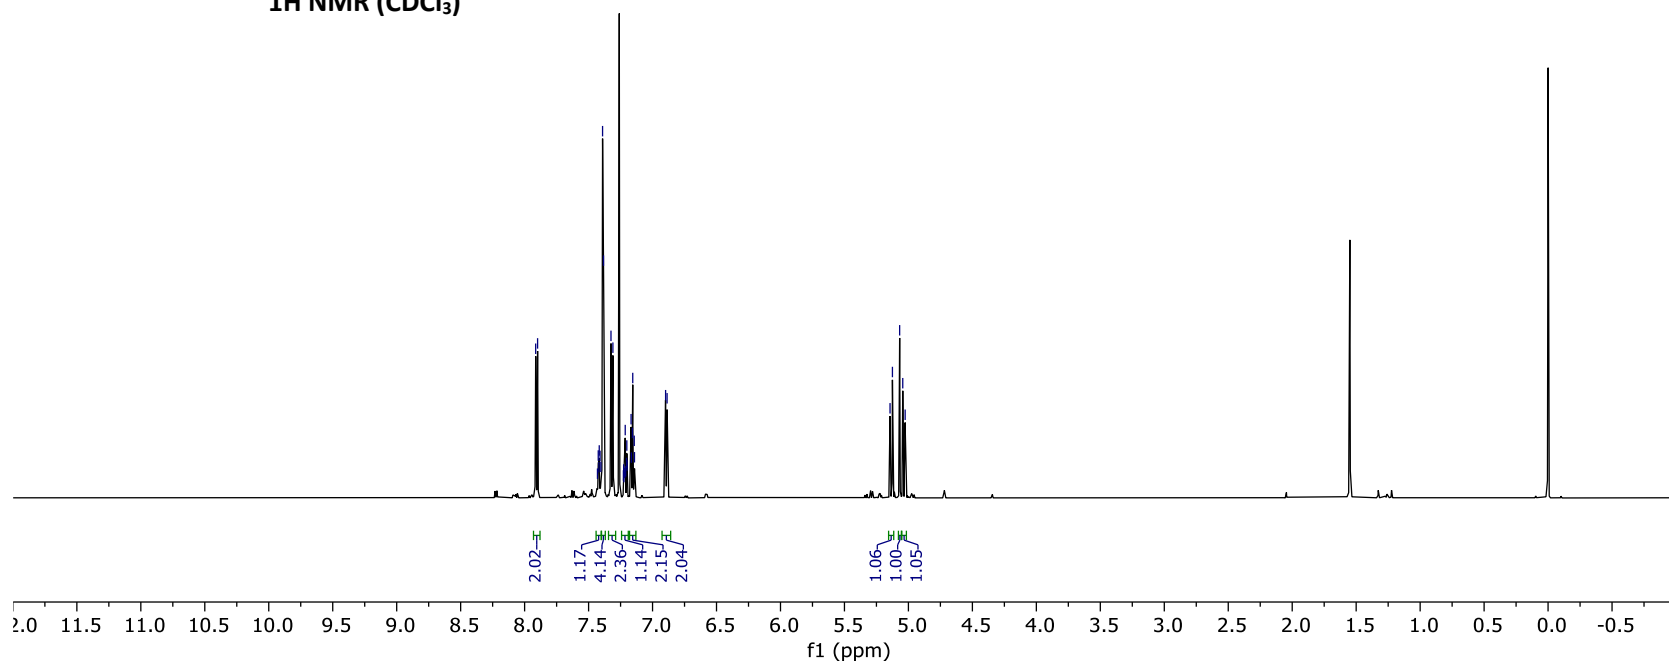

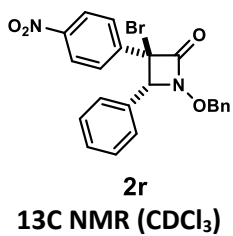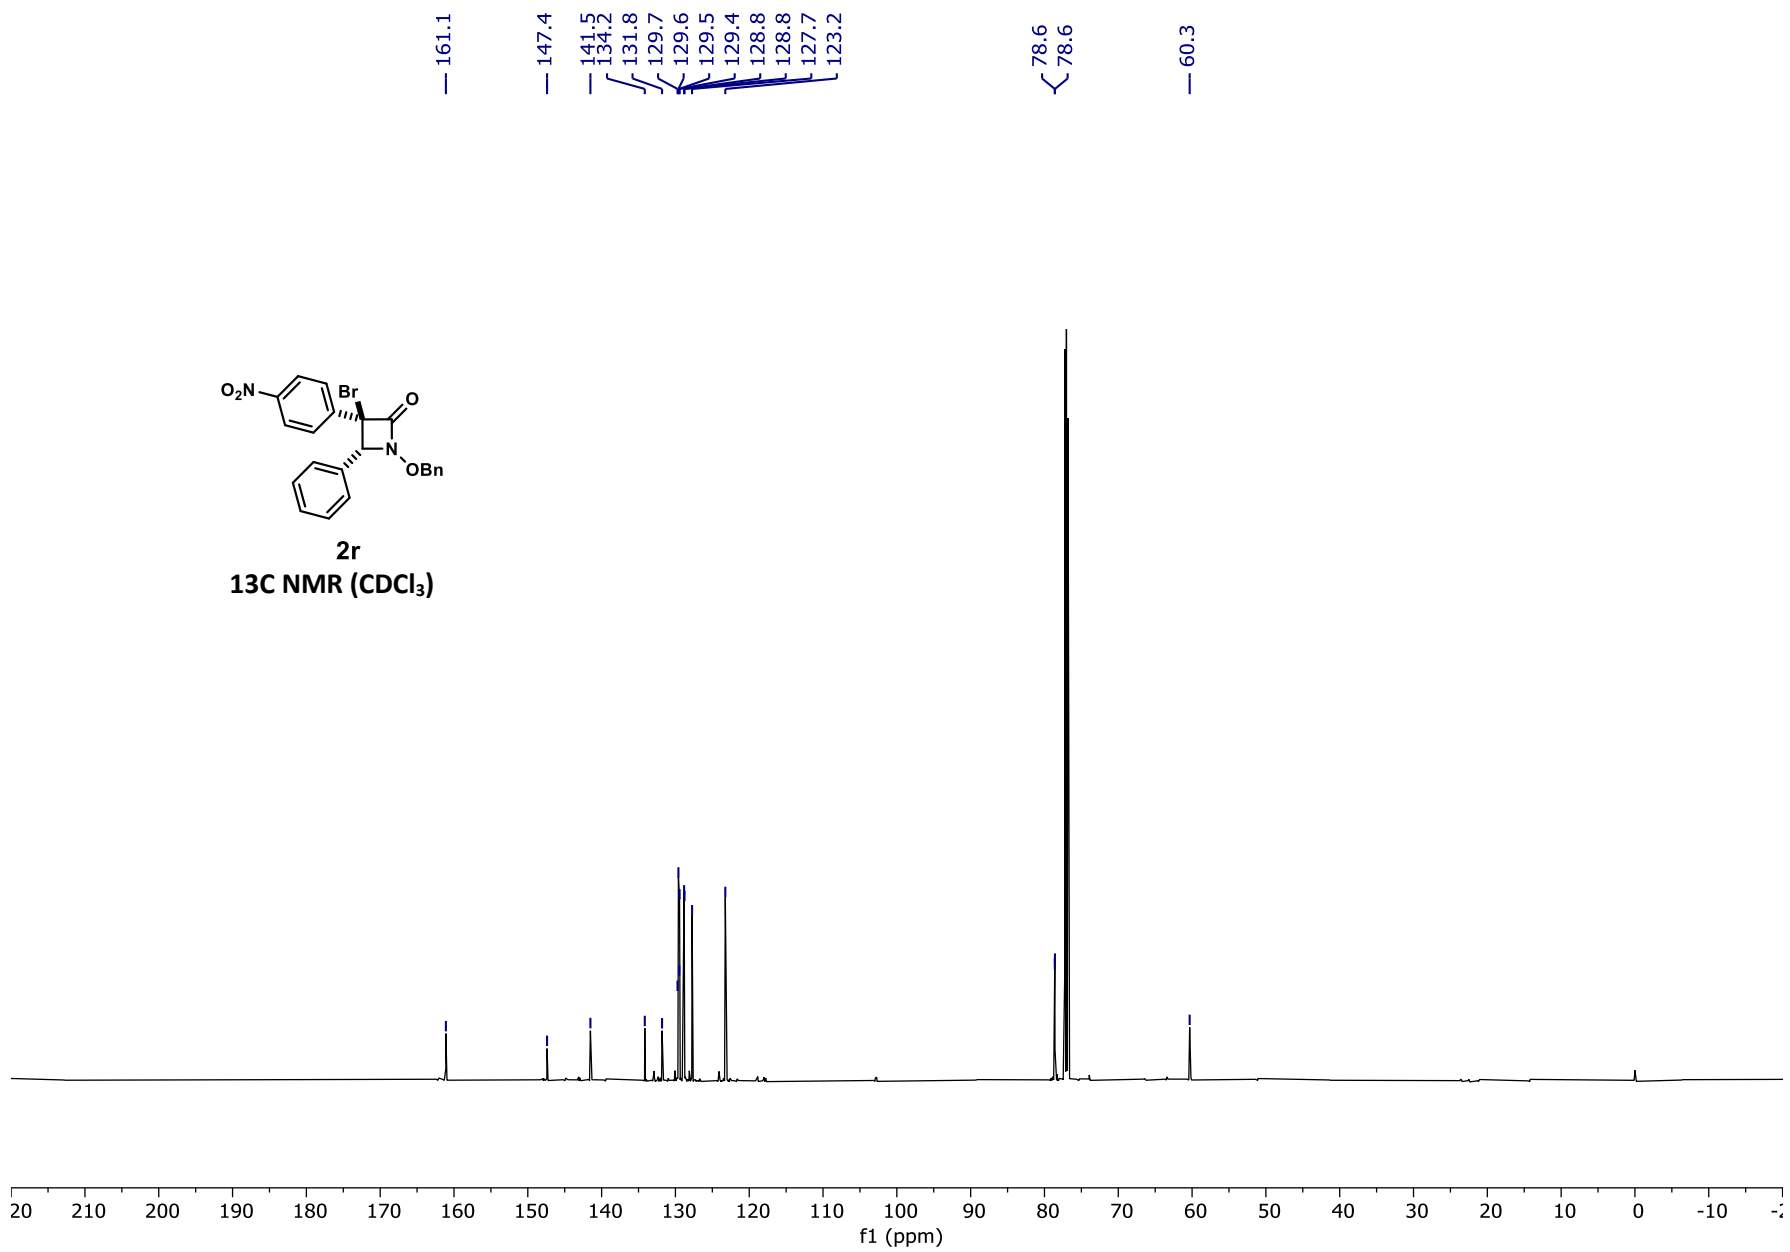

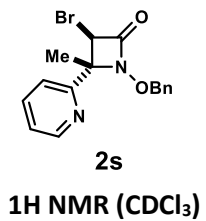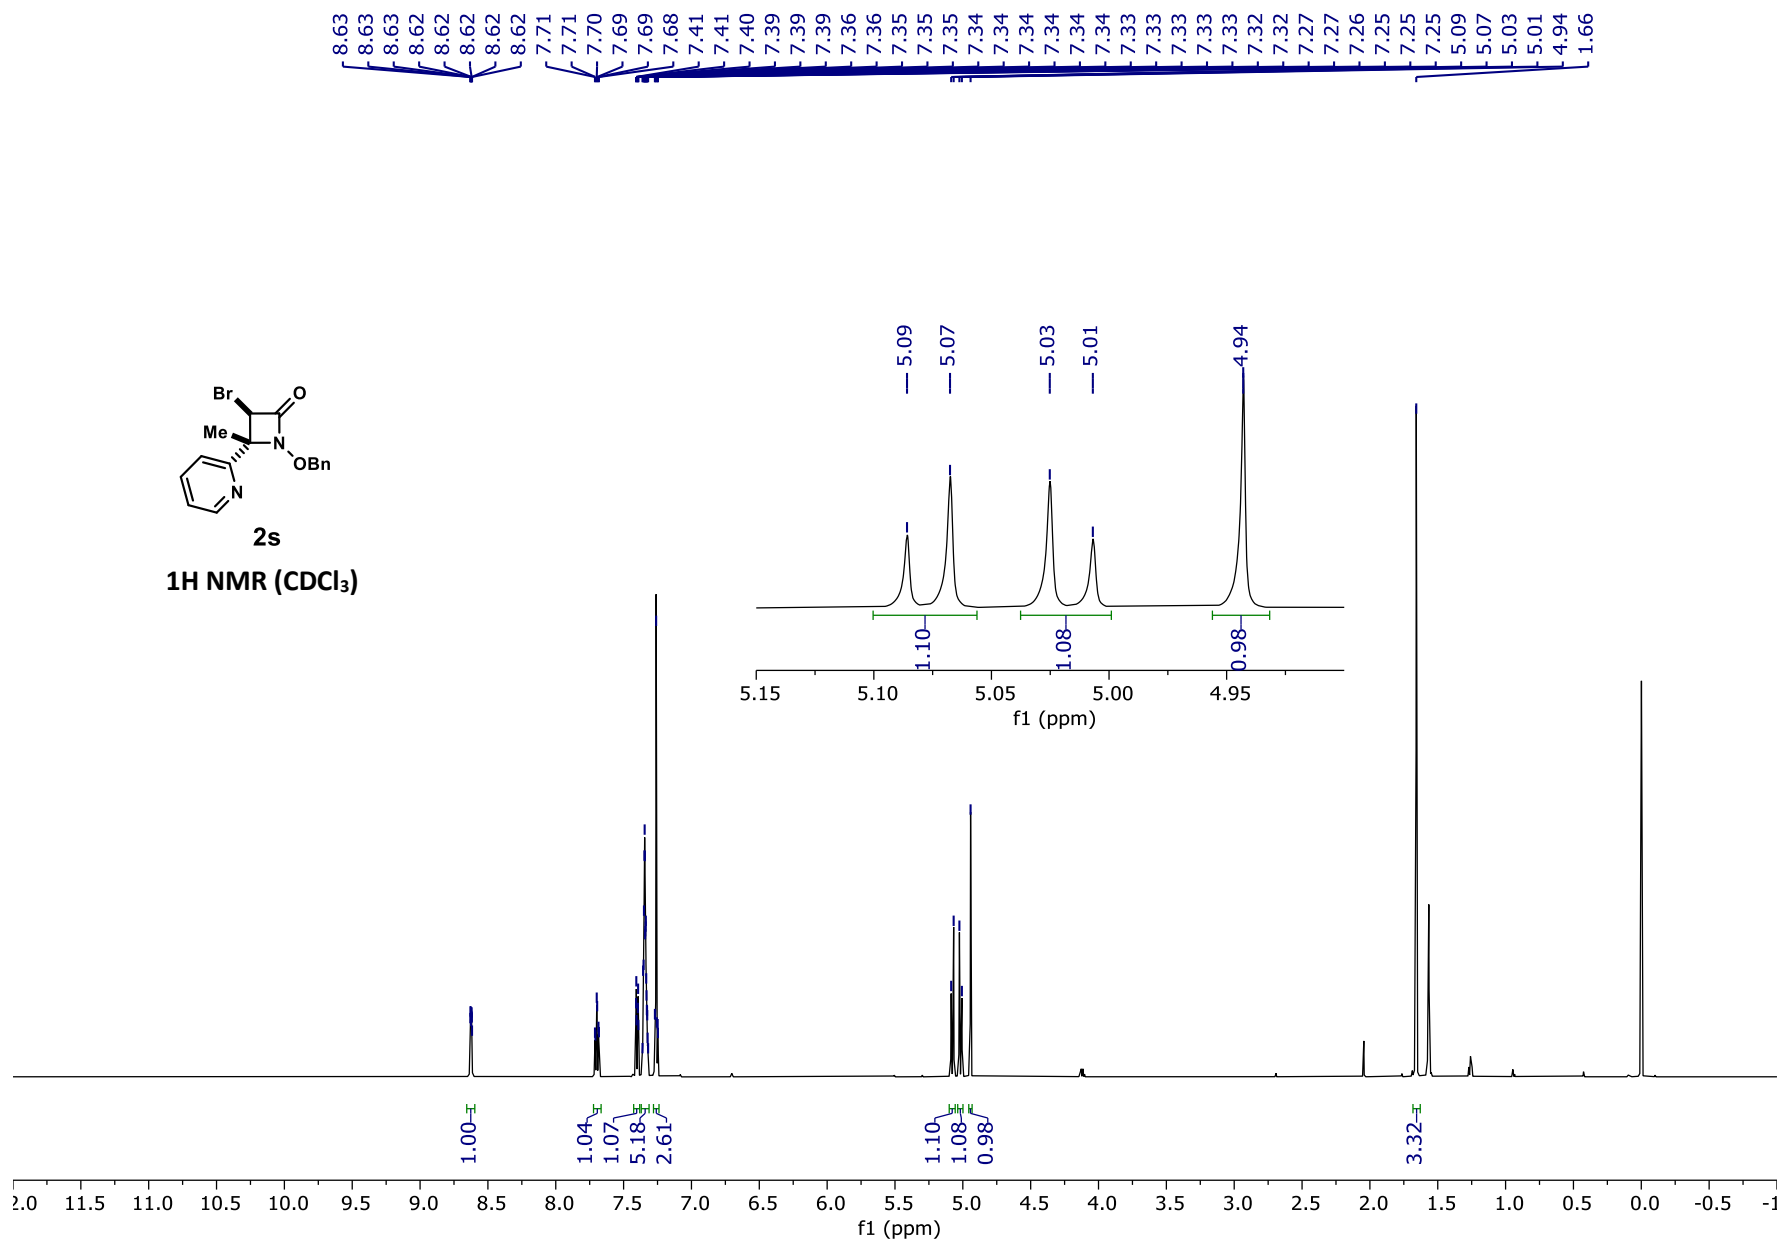

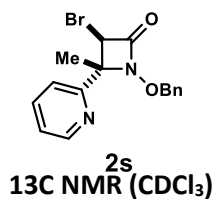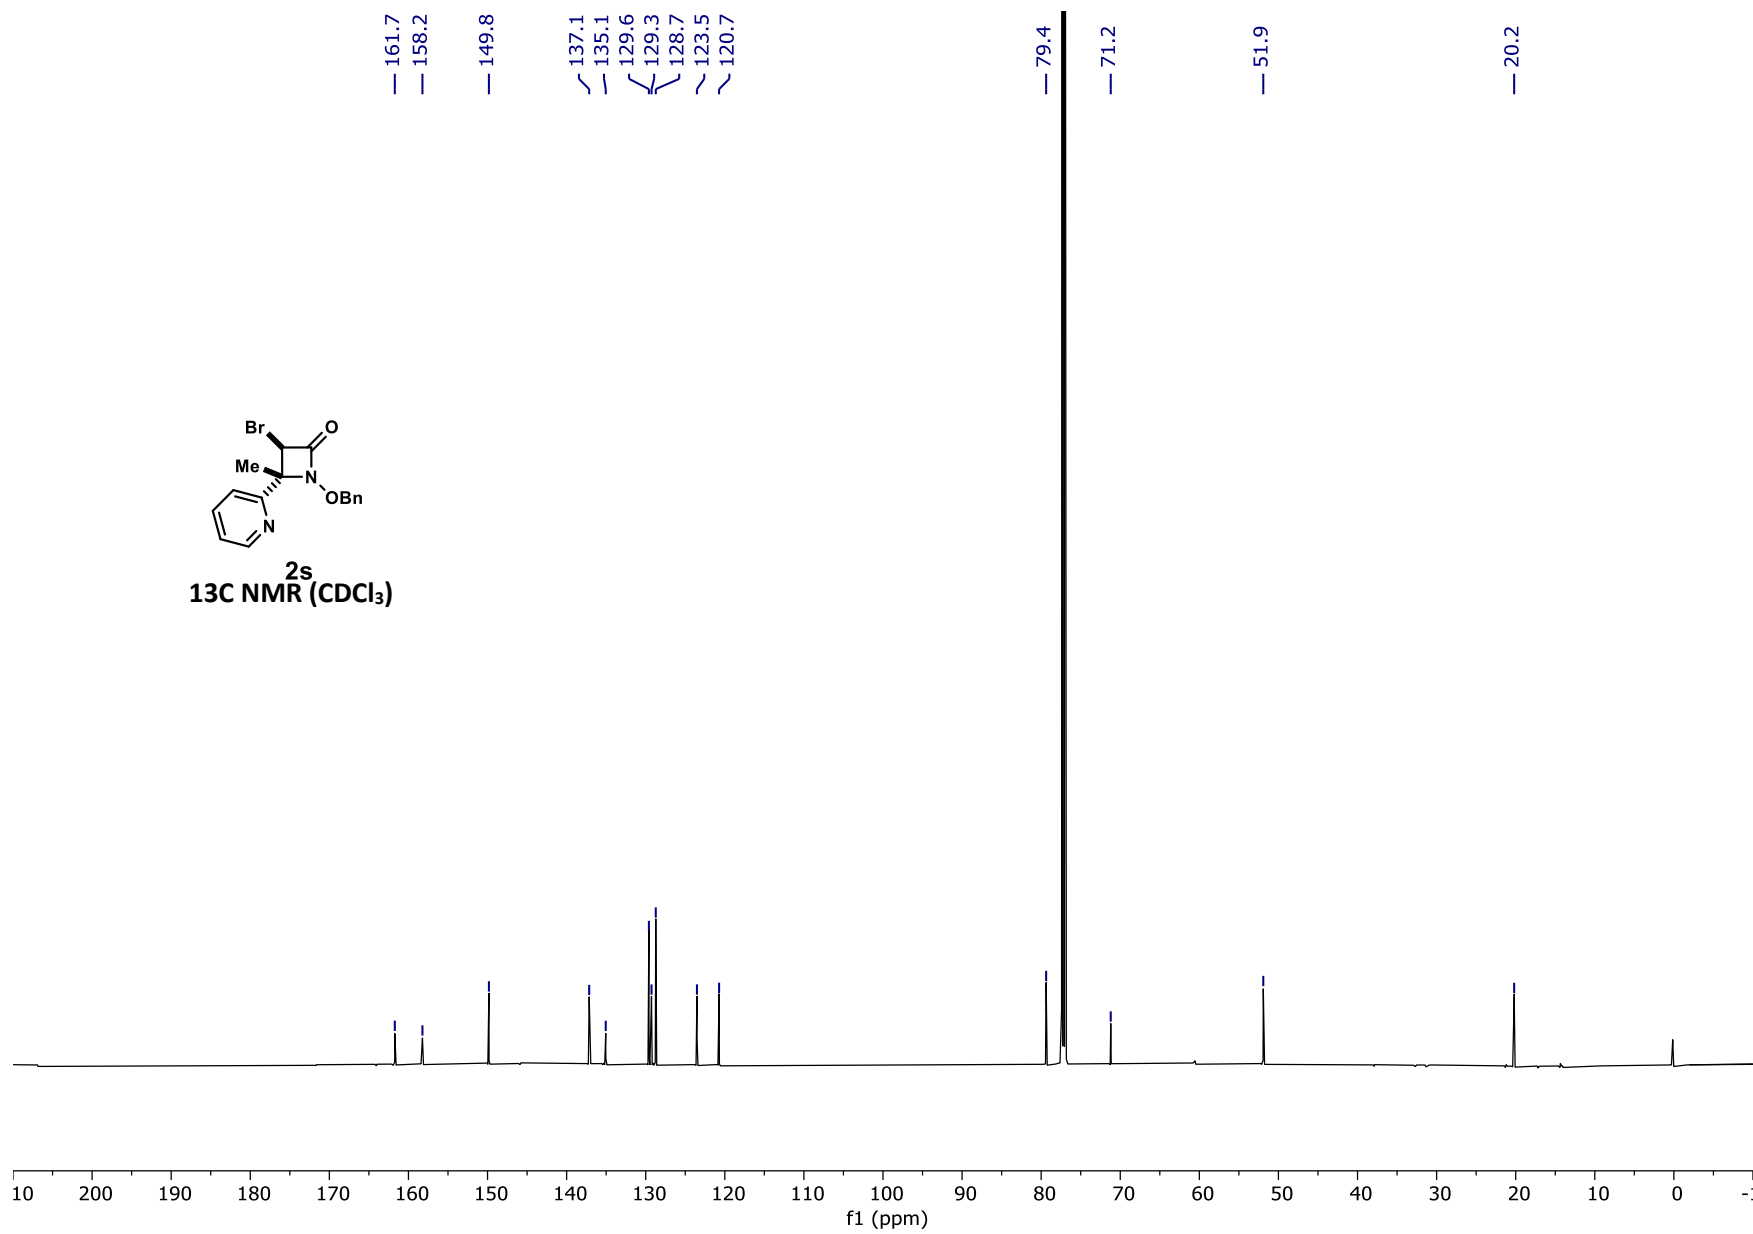

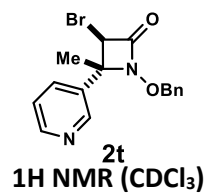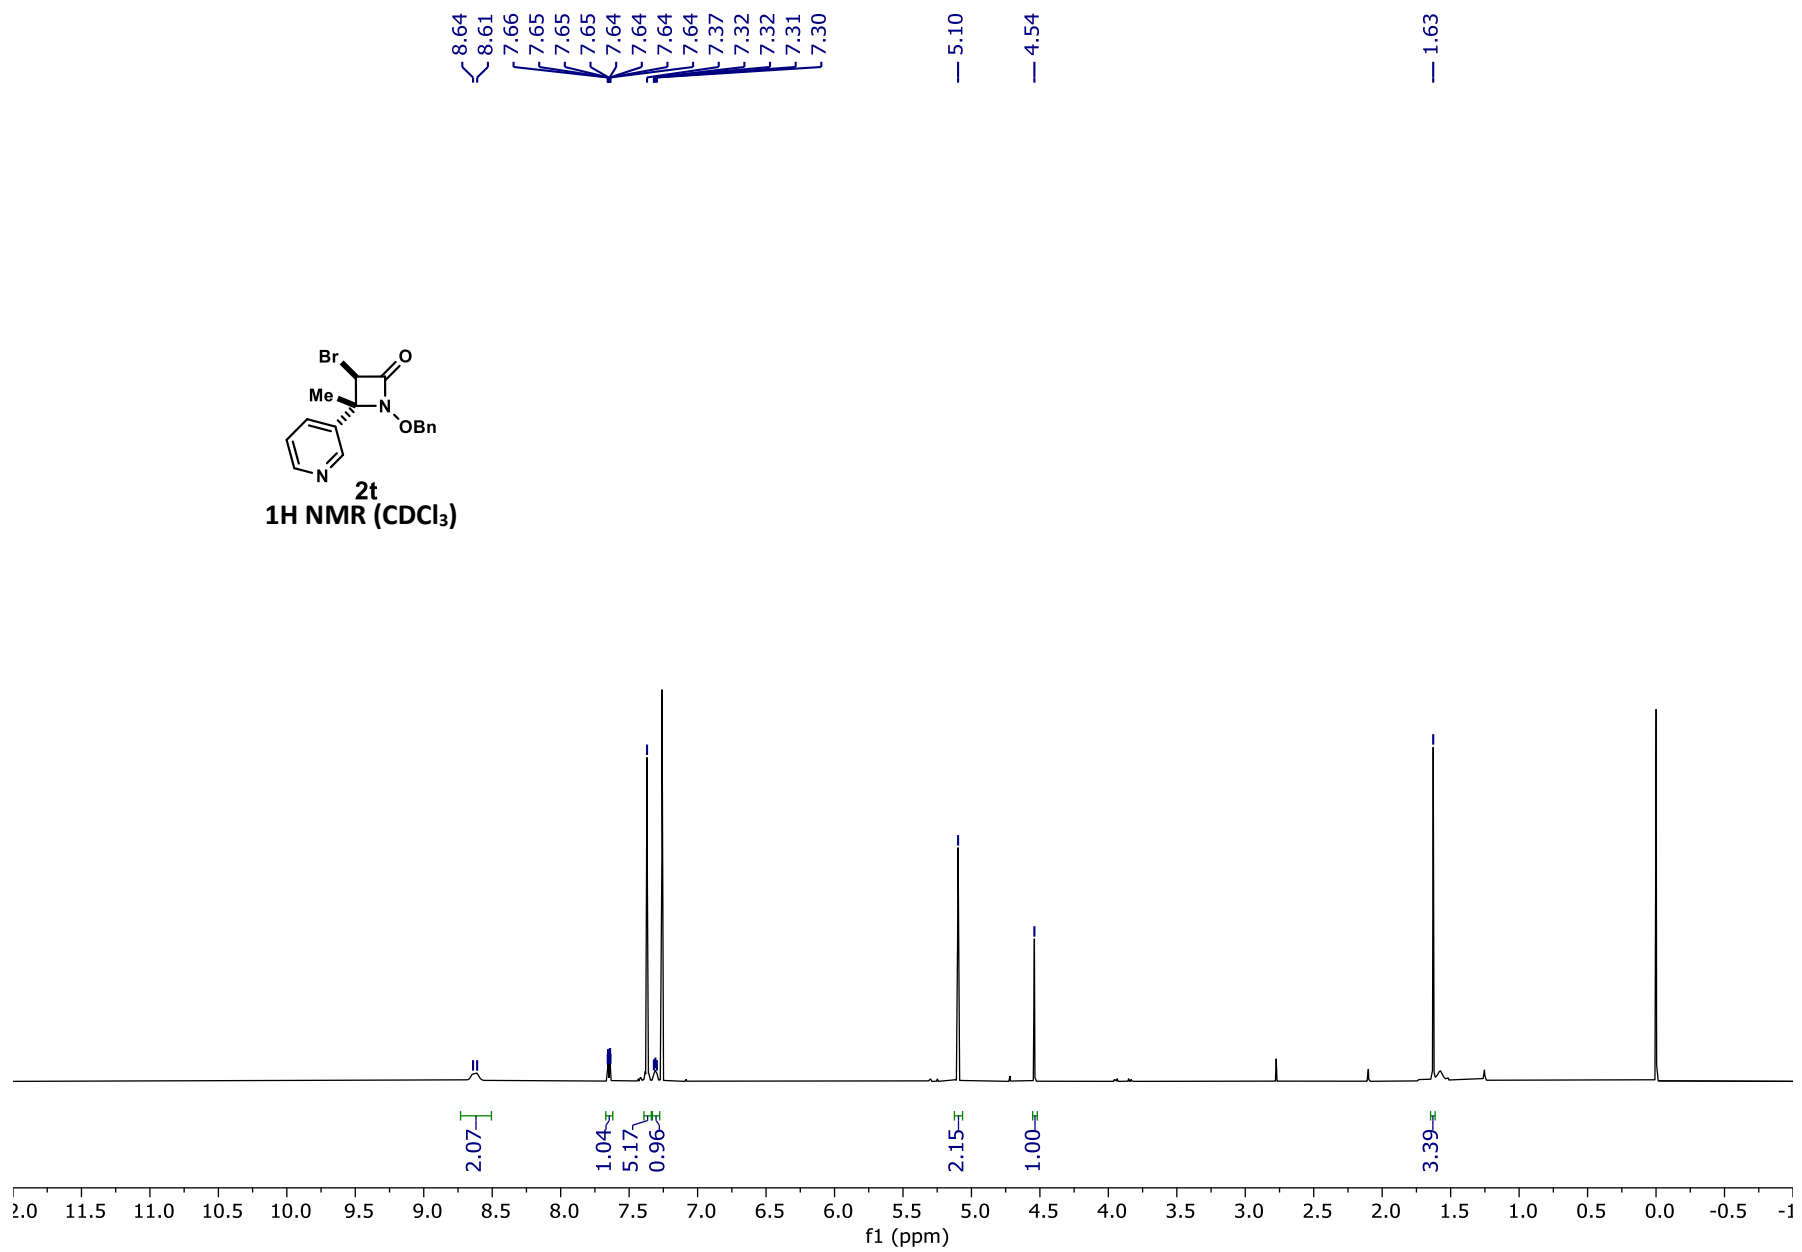

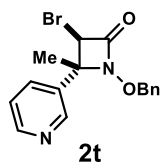

**<sup>13</sup>C NMR (CDCl<sub>3</sub>)**

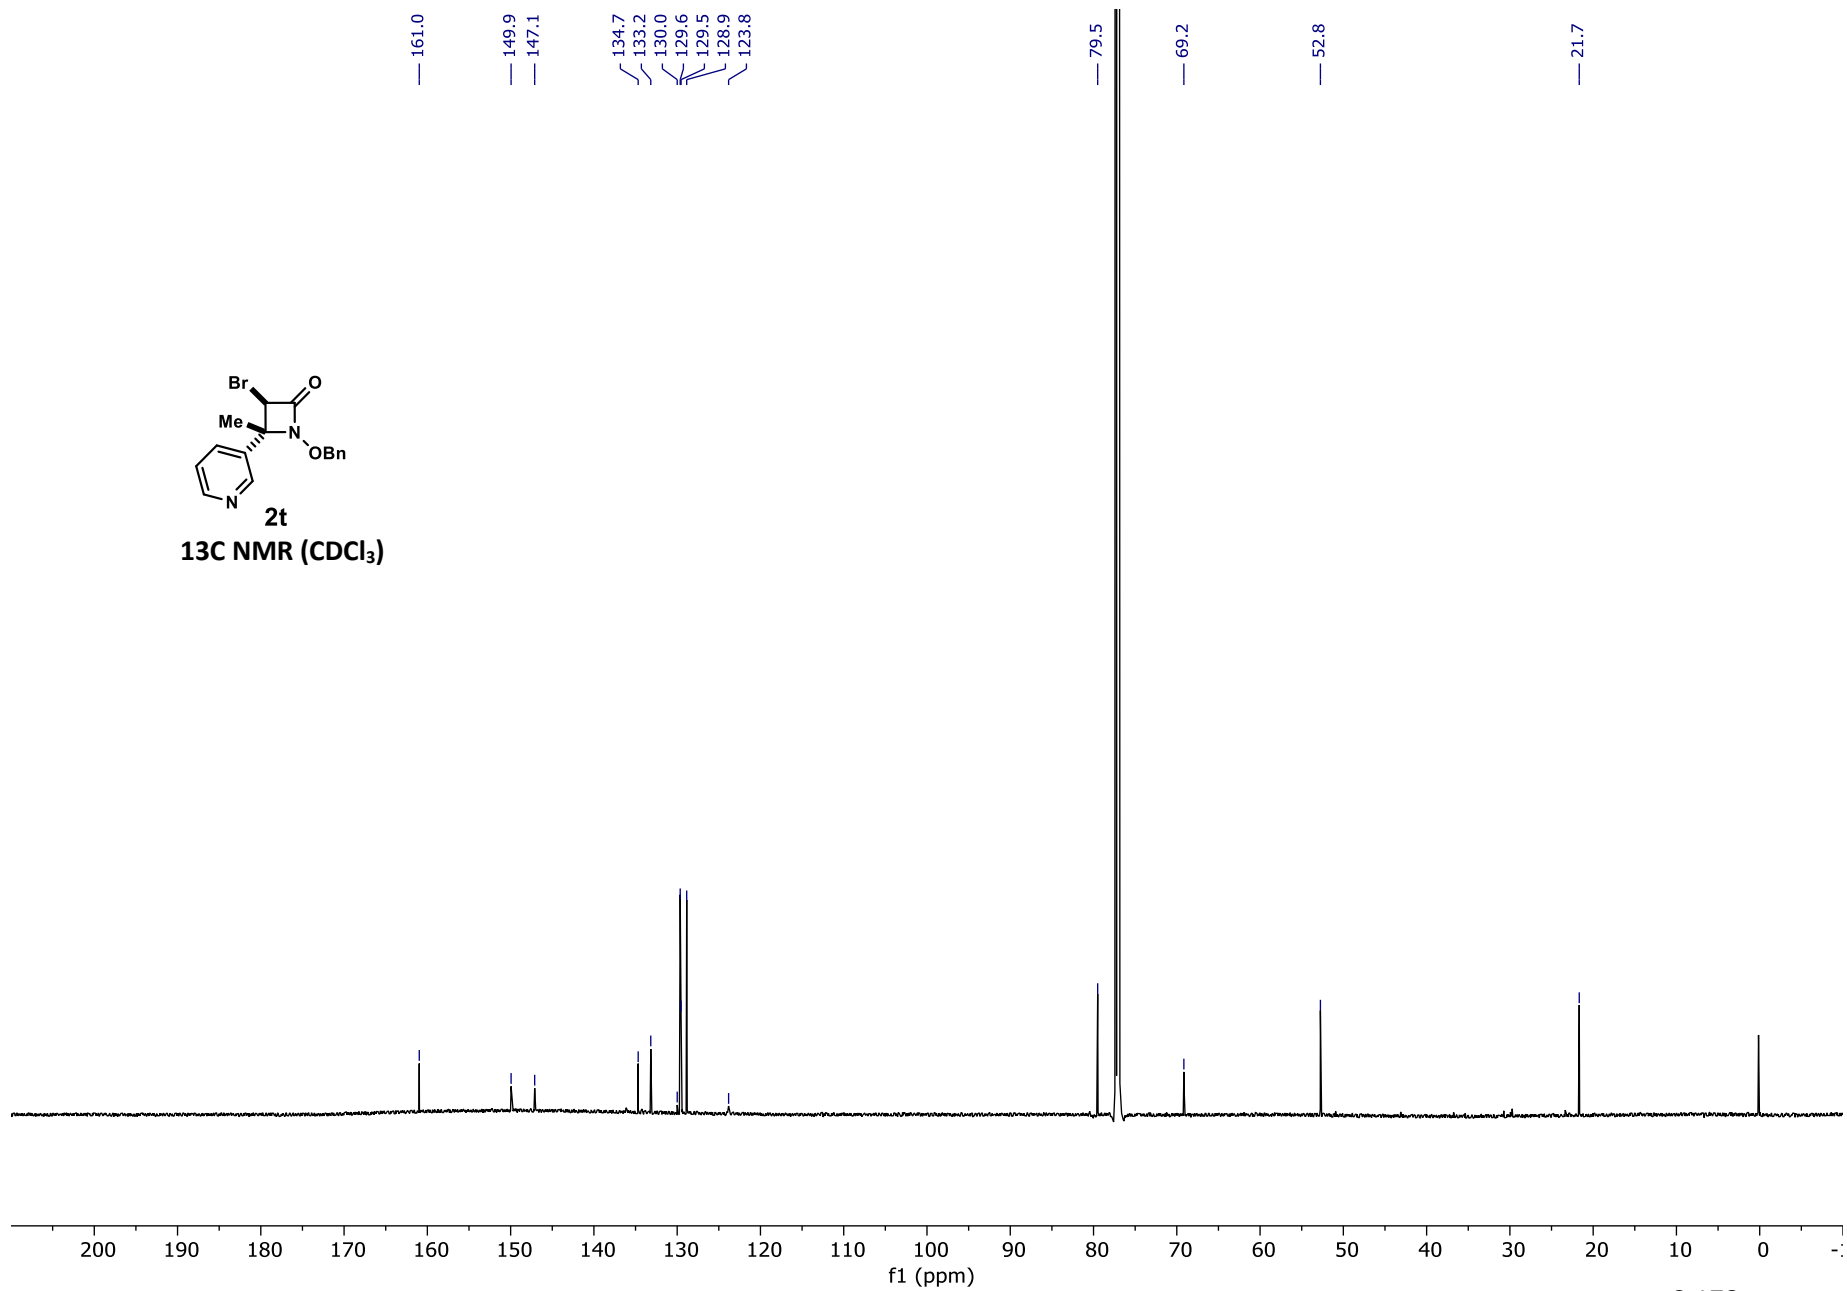

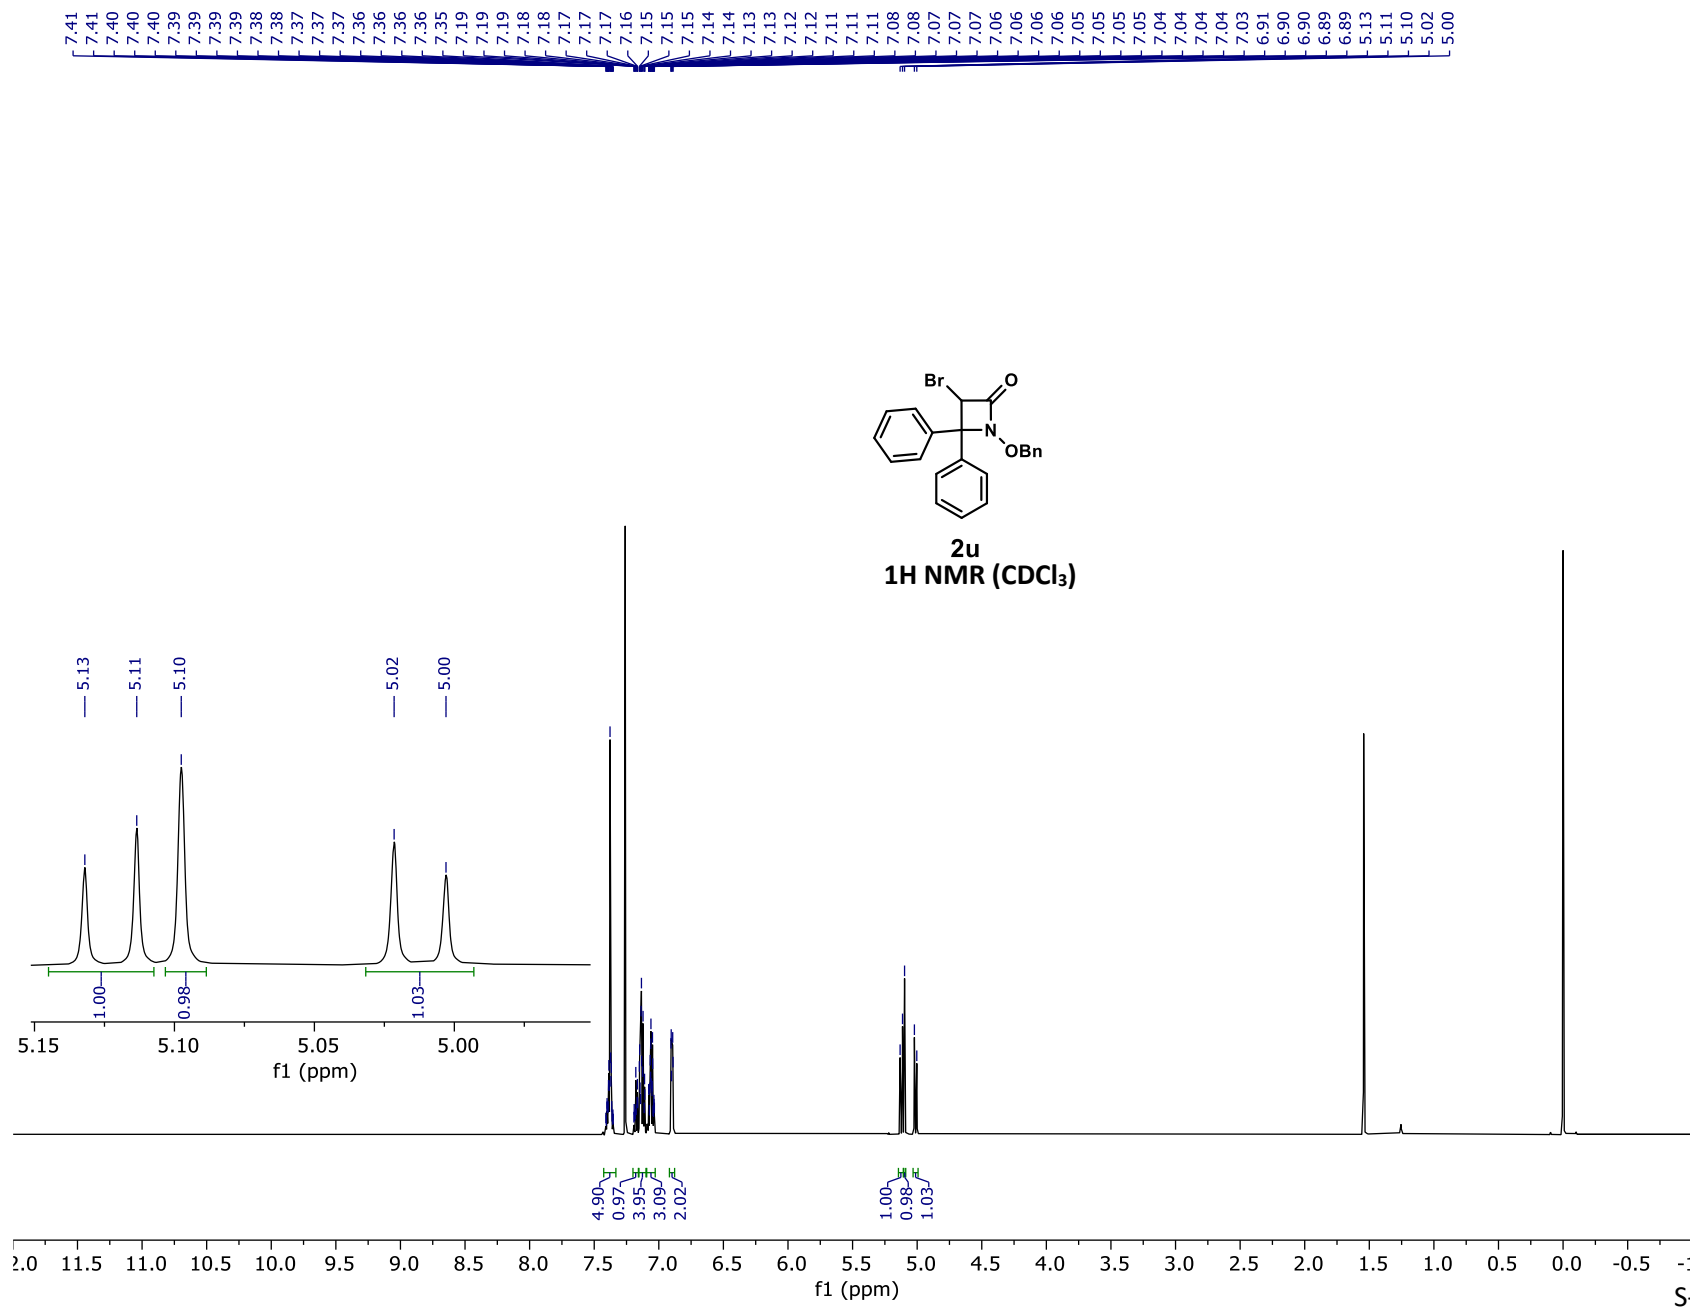

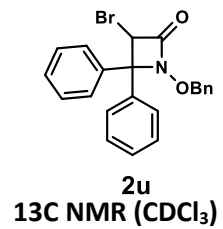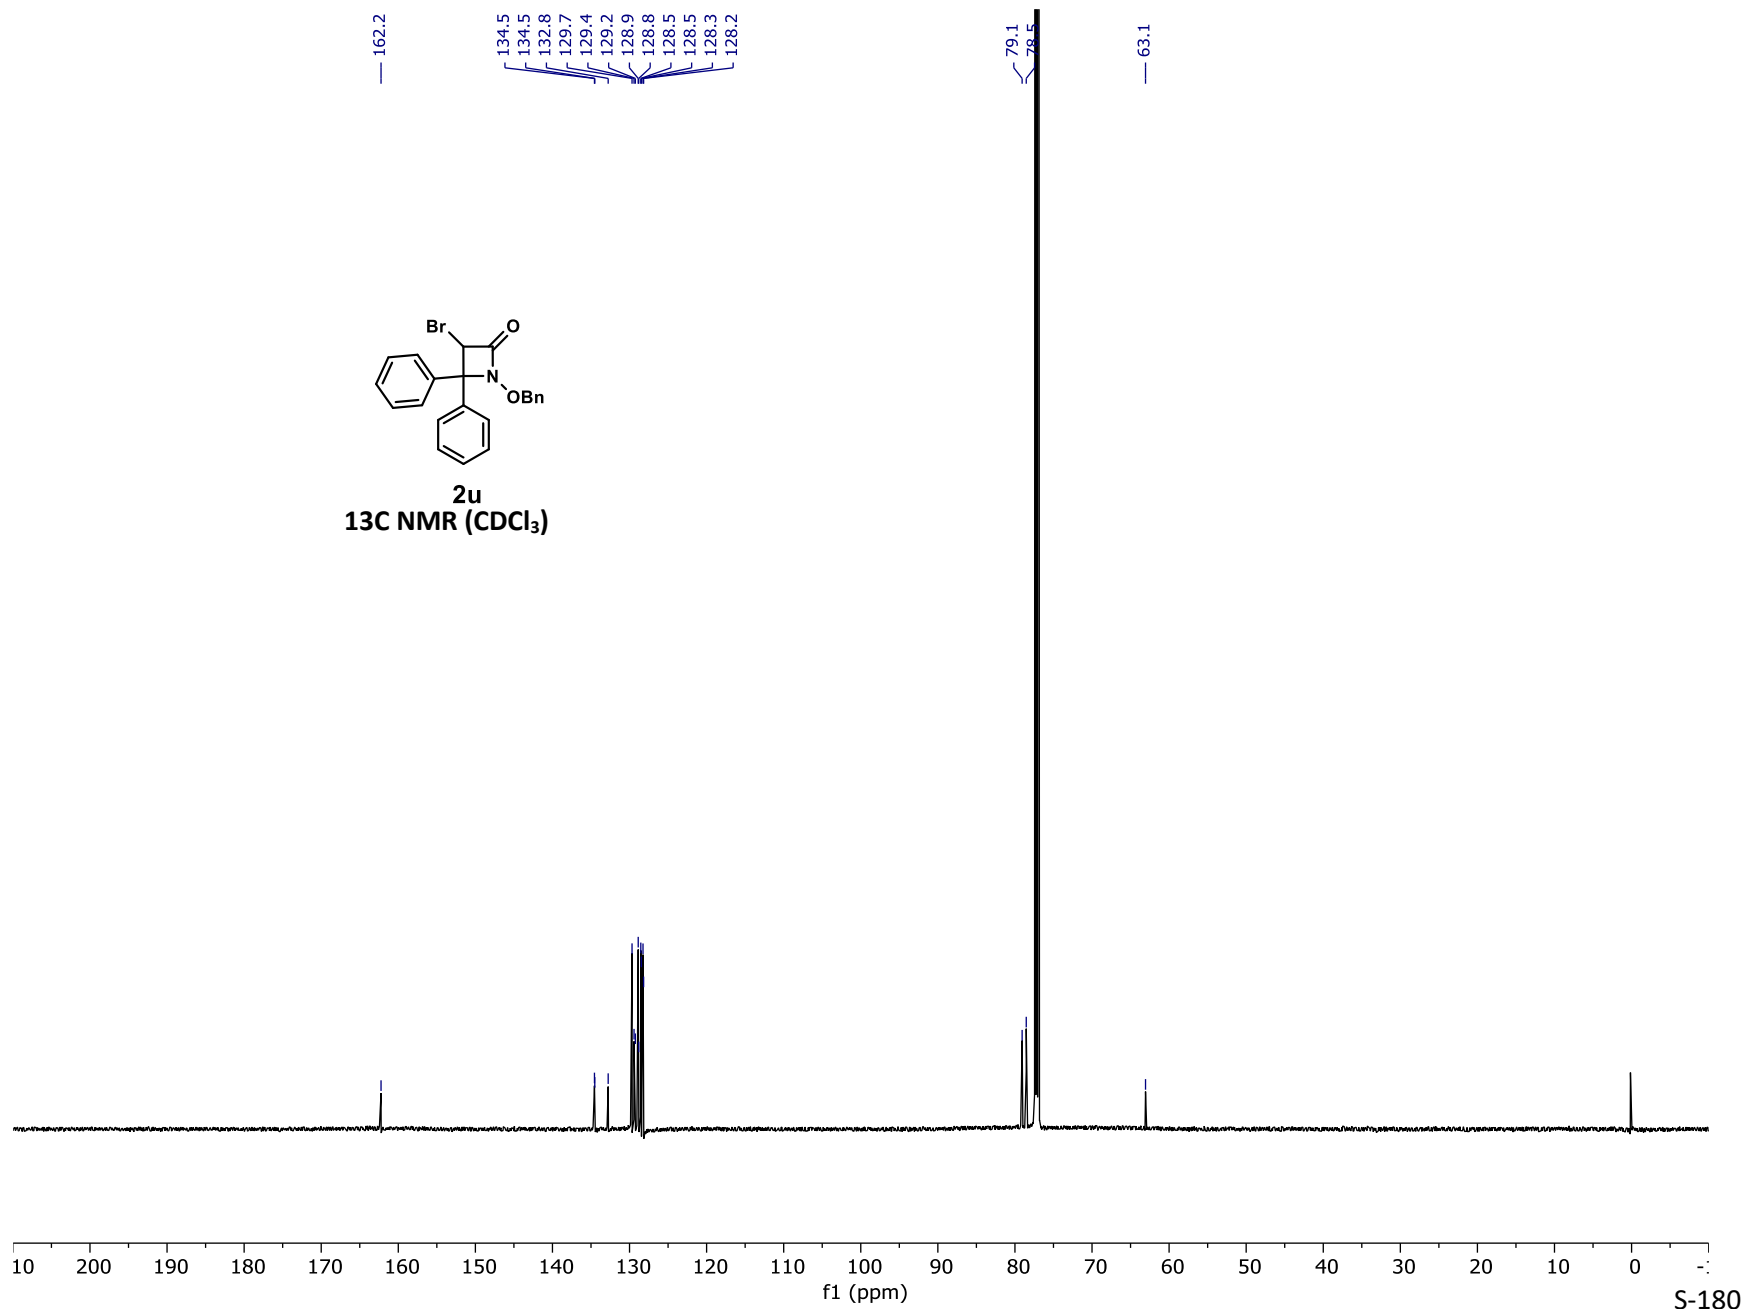



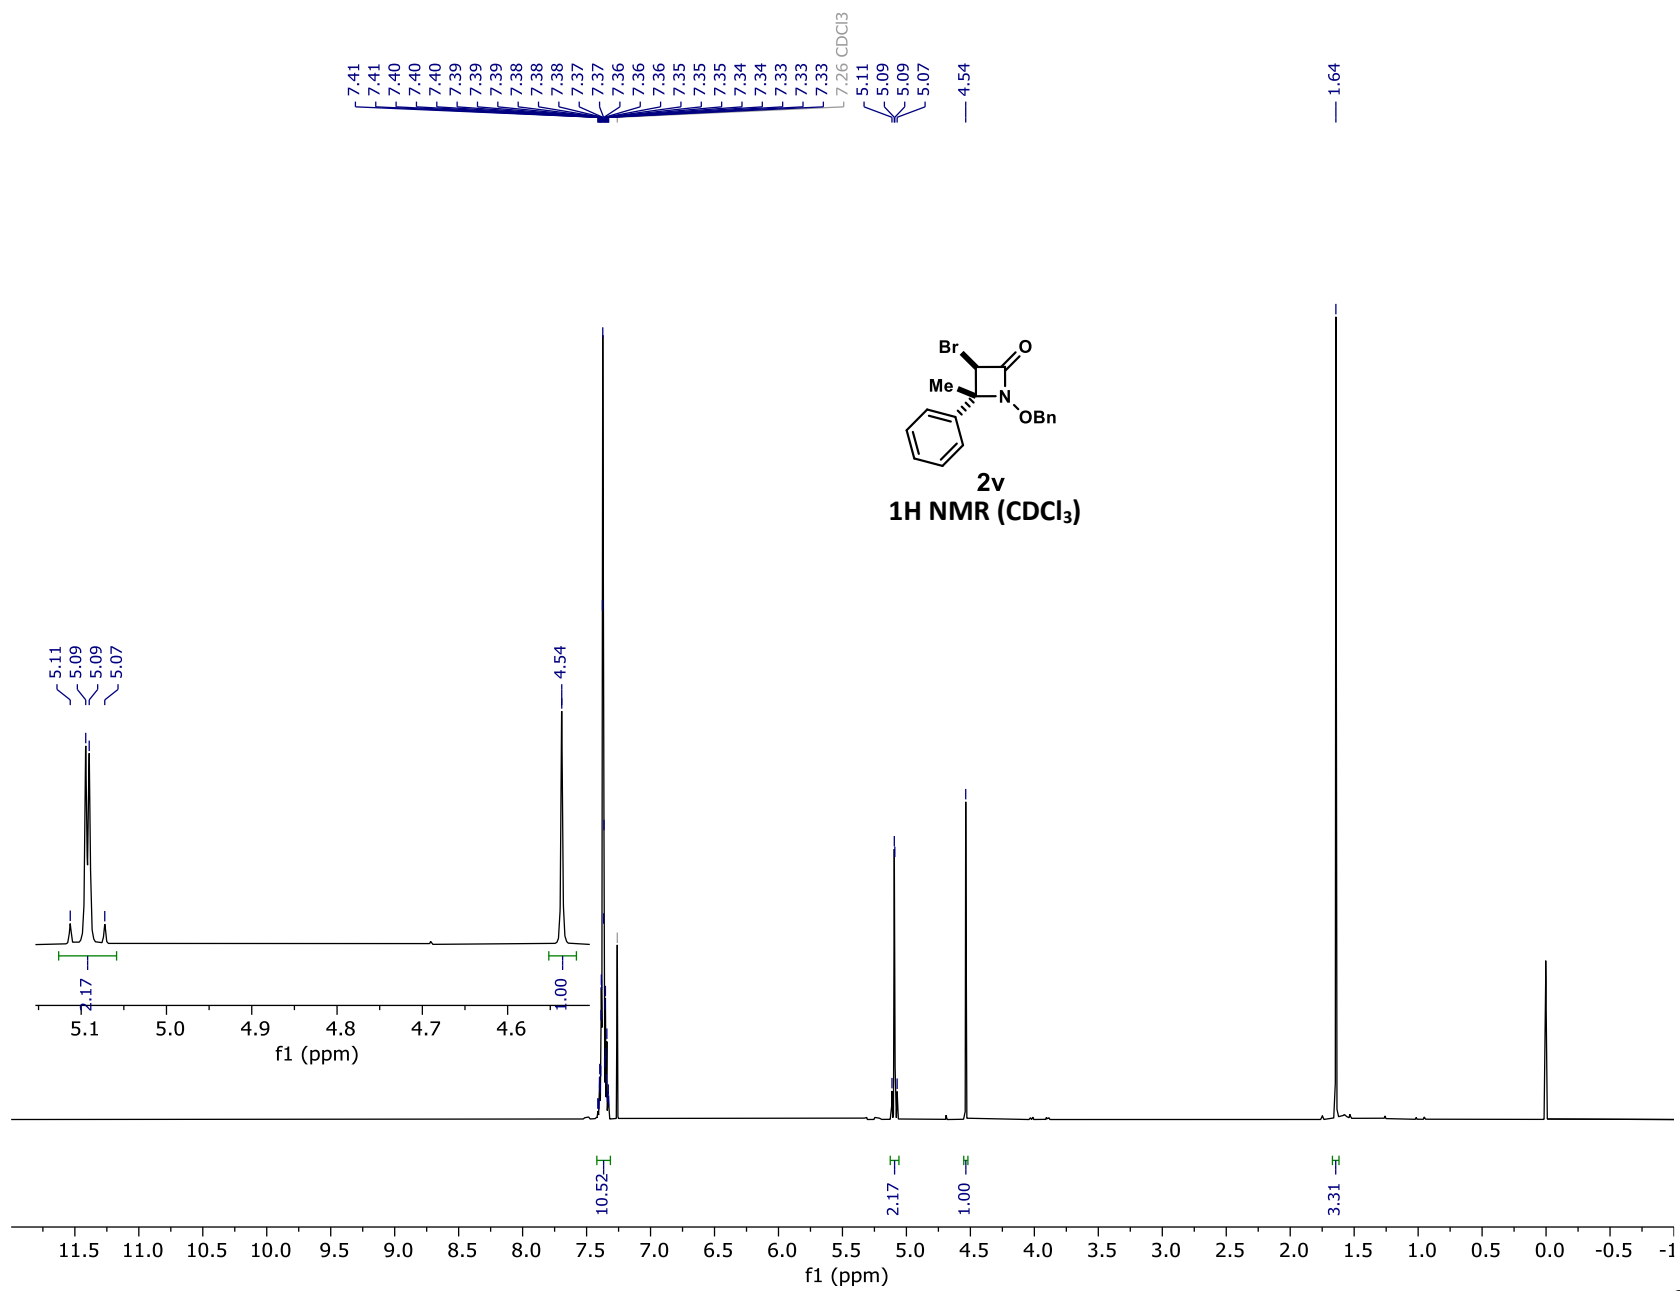

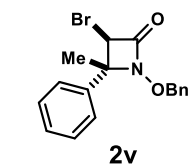

**<sup>13</sup>C NMR (CDCl<sub>3</sub>)**

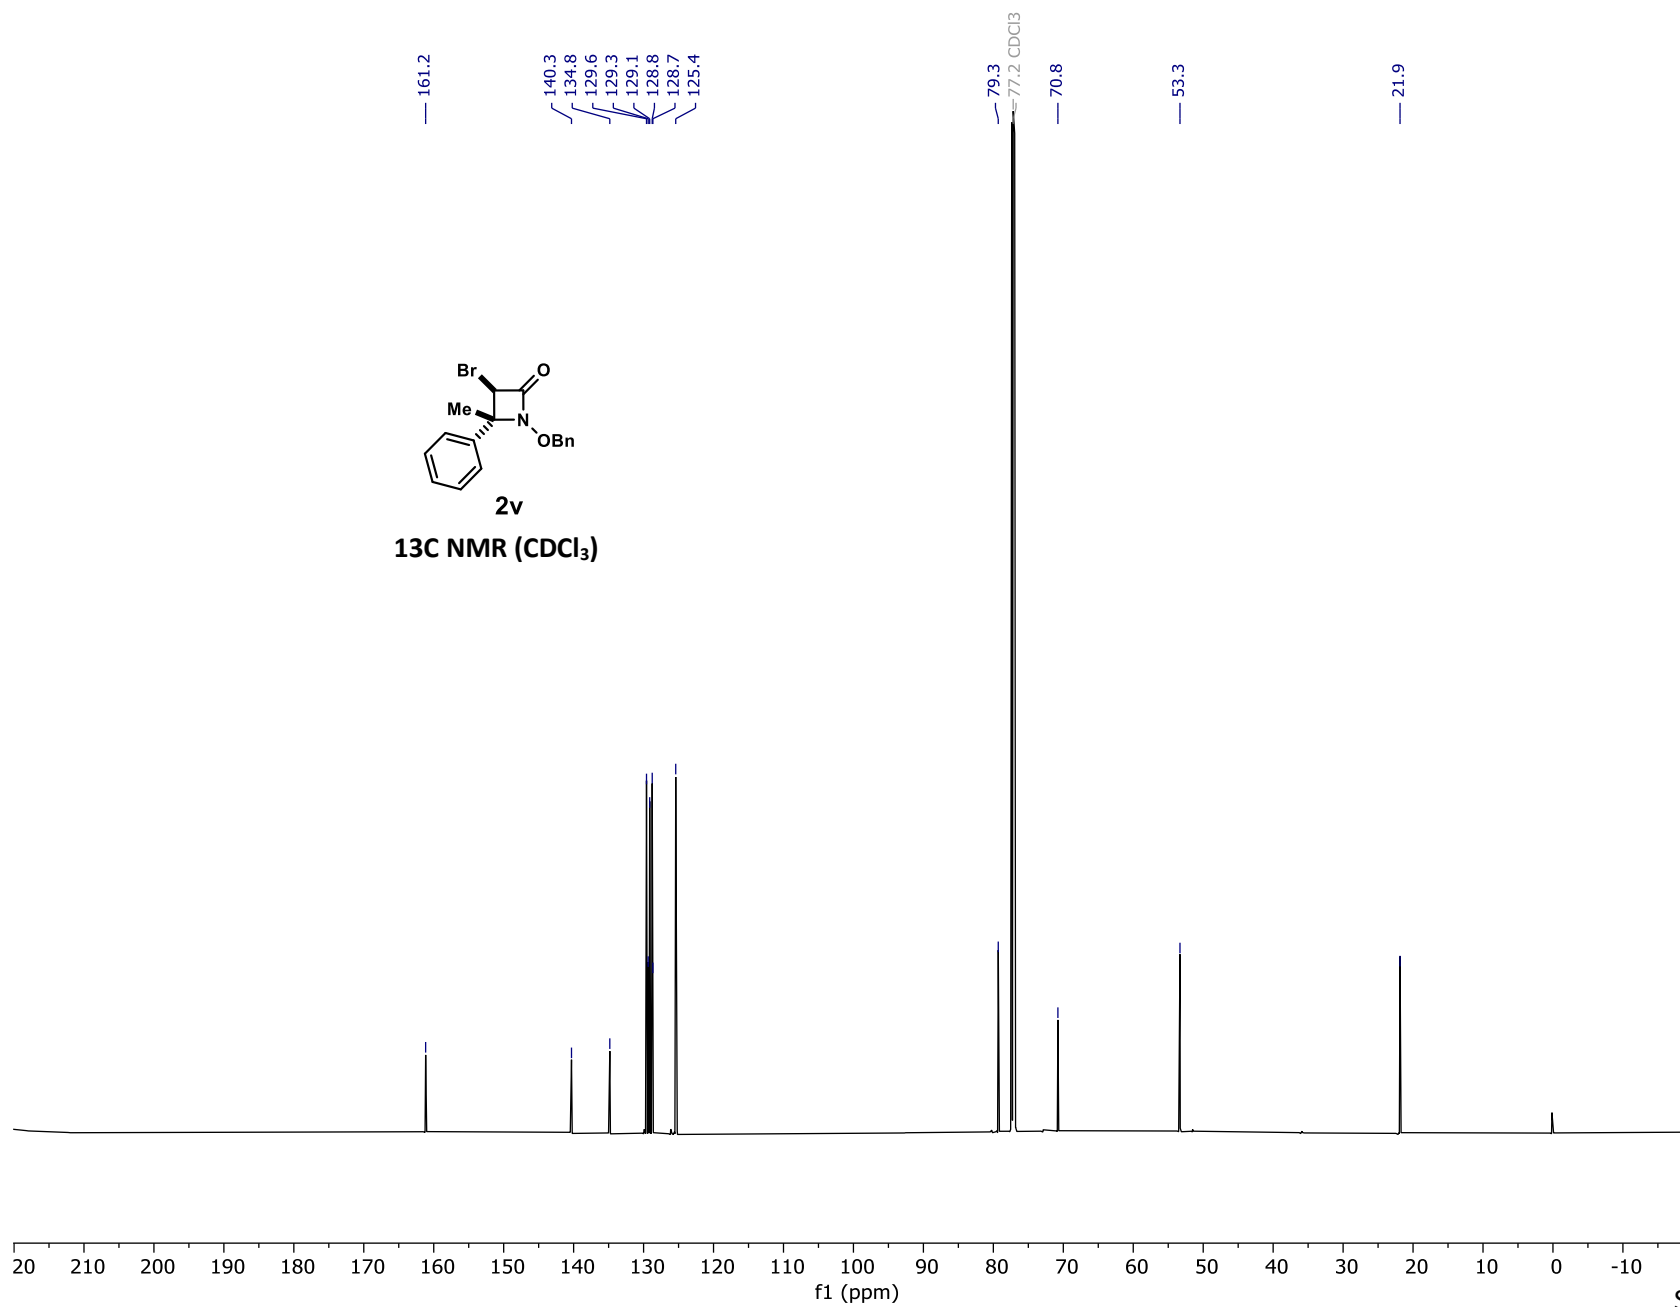

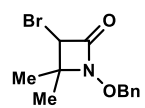

2w

<sup>1</sup>H NMR (CDCl<sub>3</sub>)

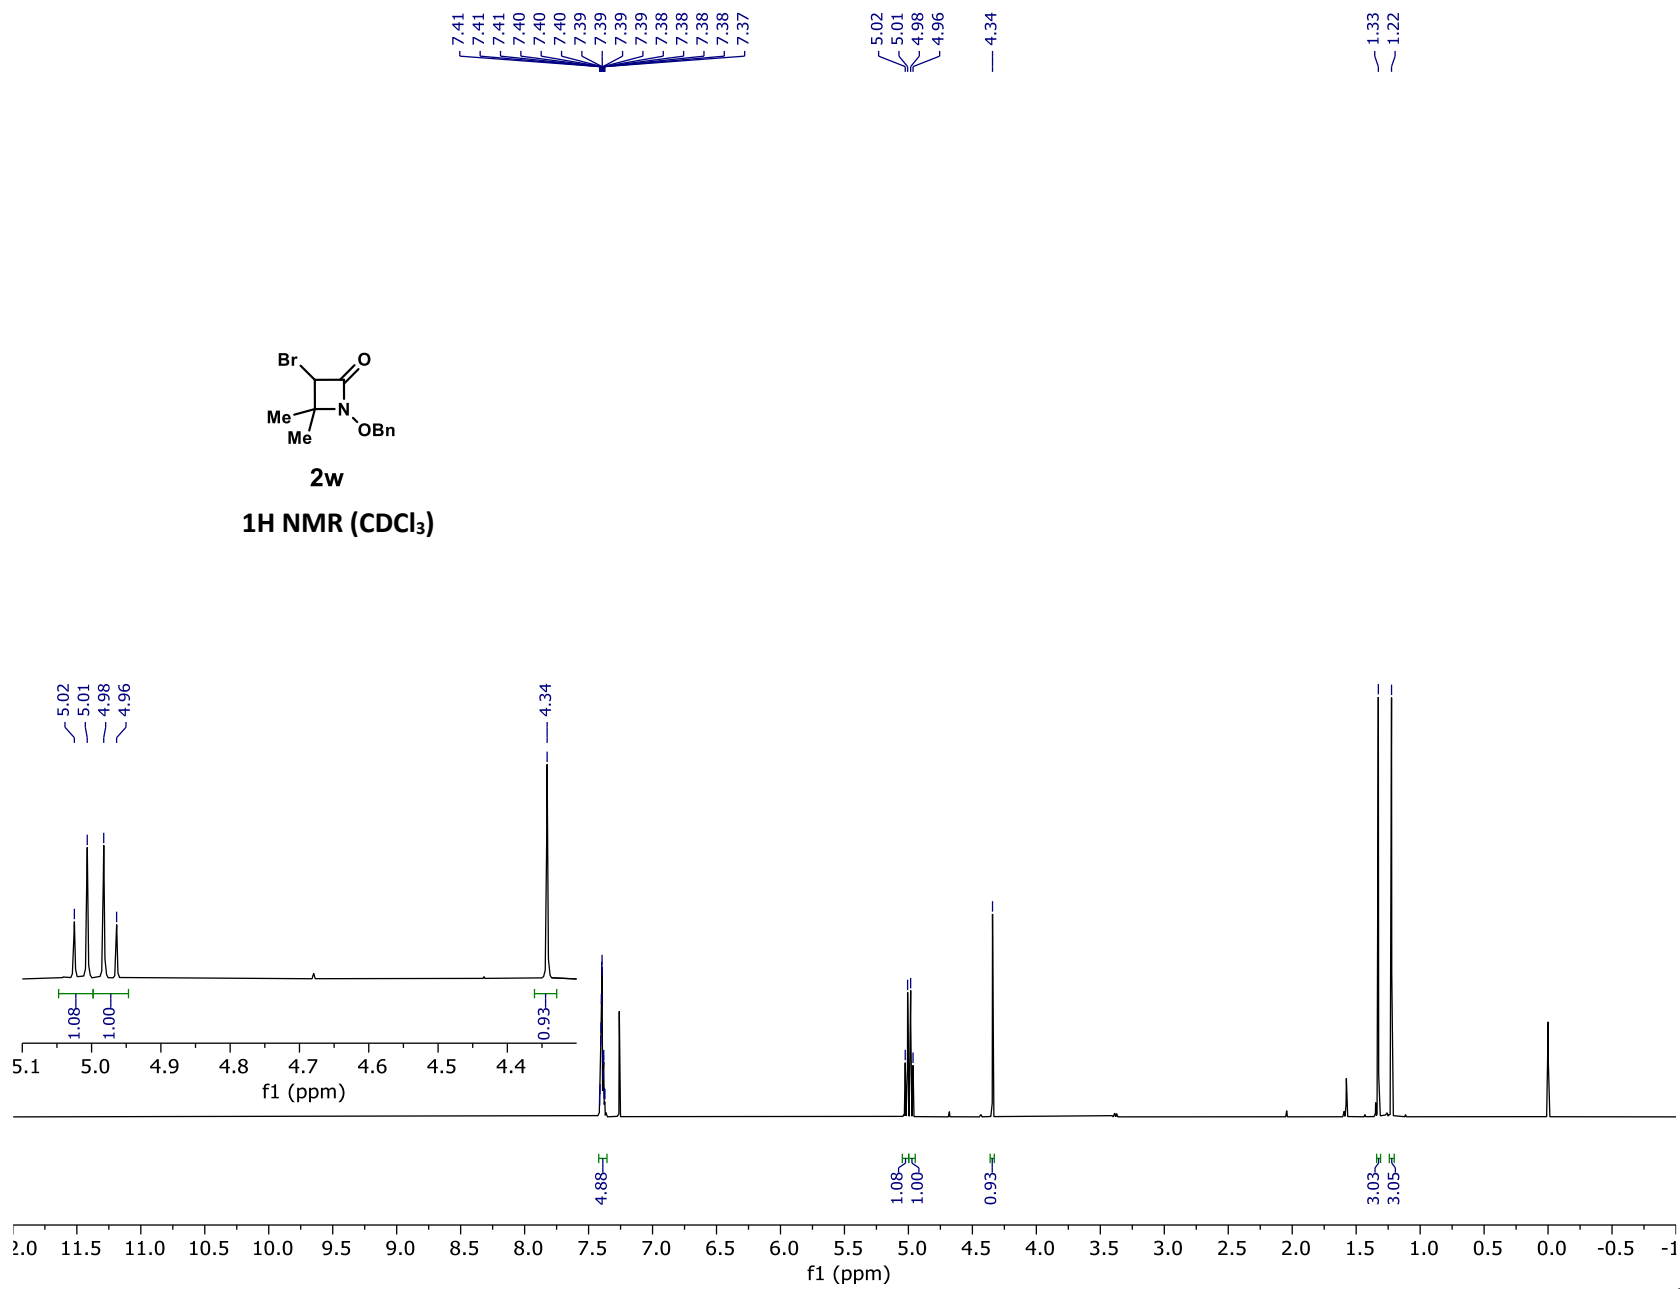

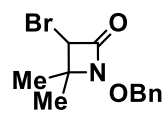

2w

$^{13}\text{C}$  NMR ( $\text{CDCl}_3$ )

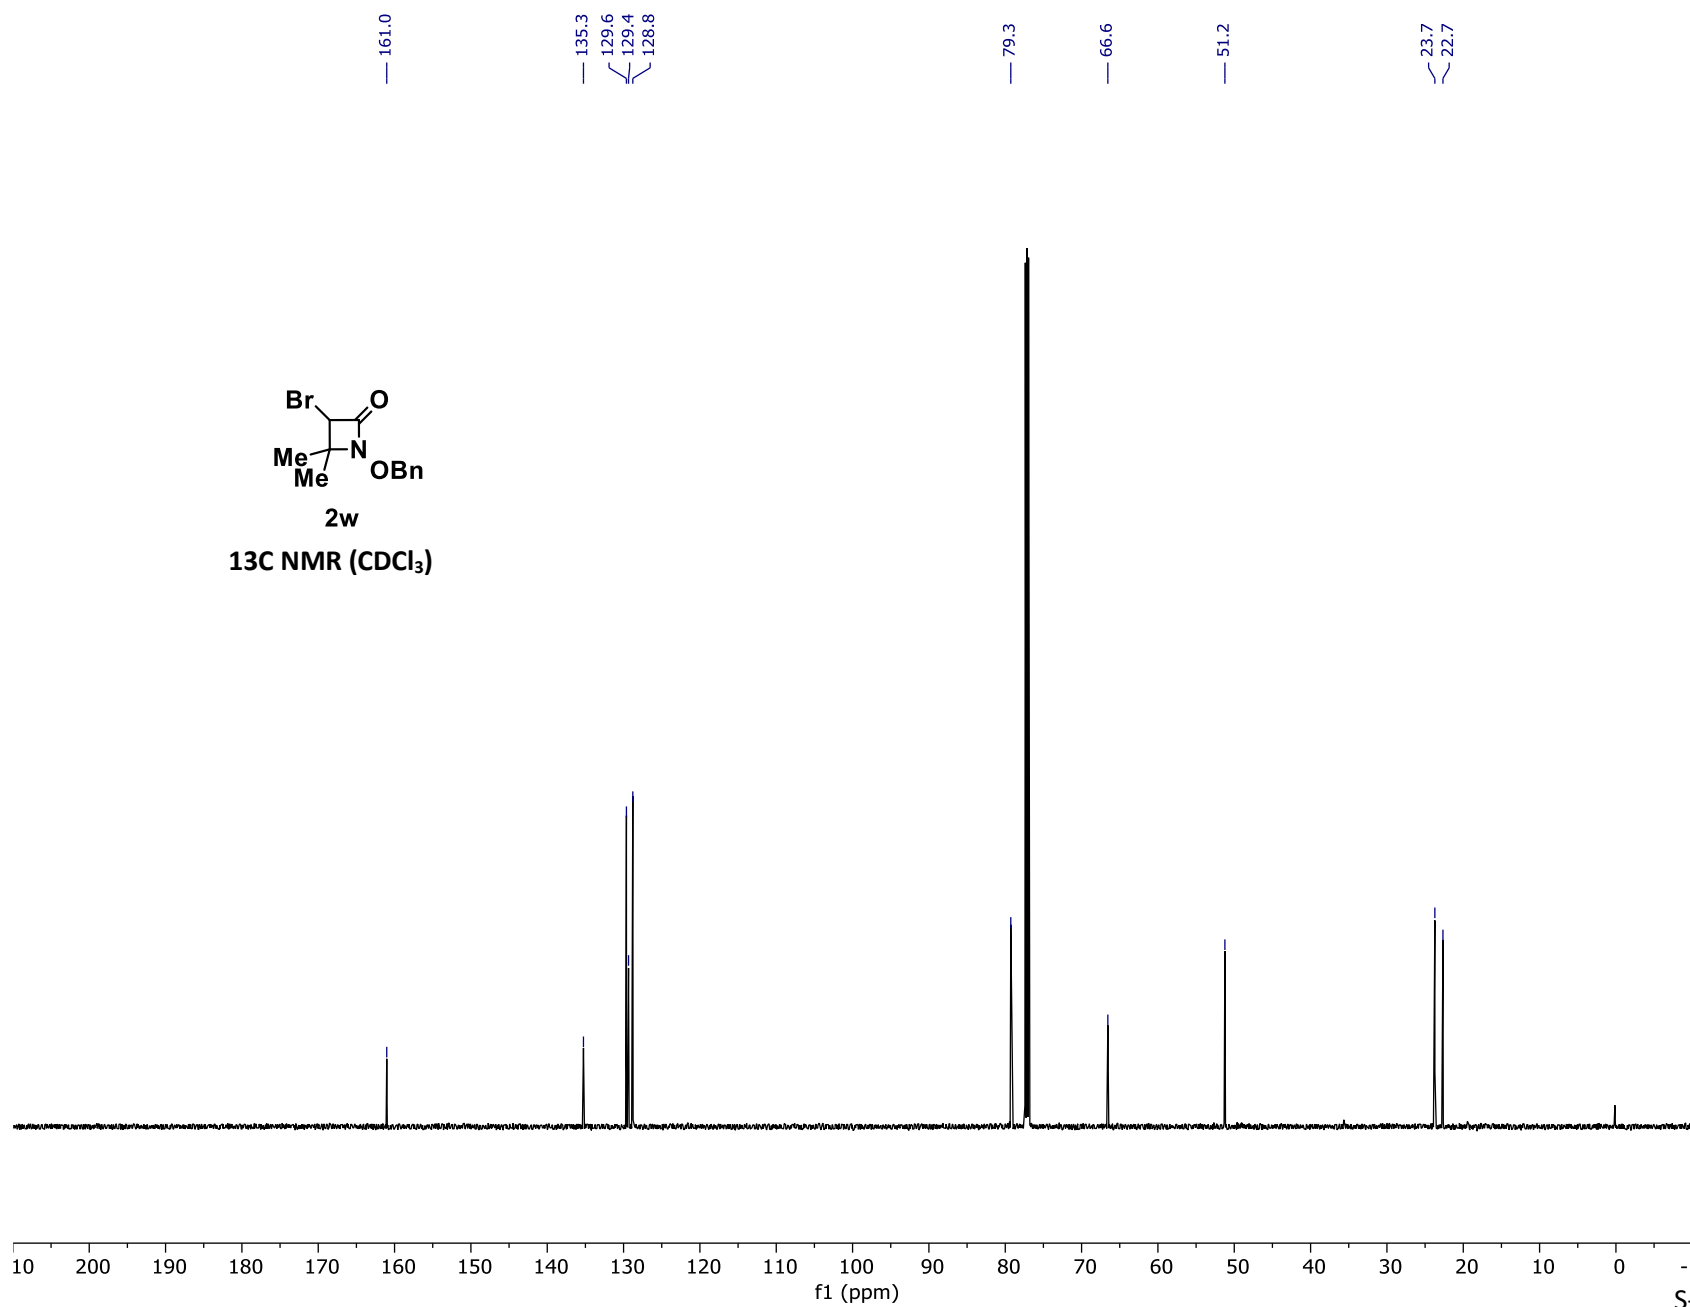

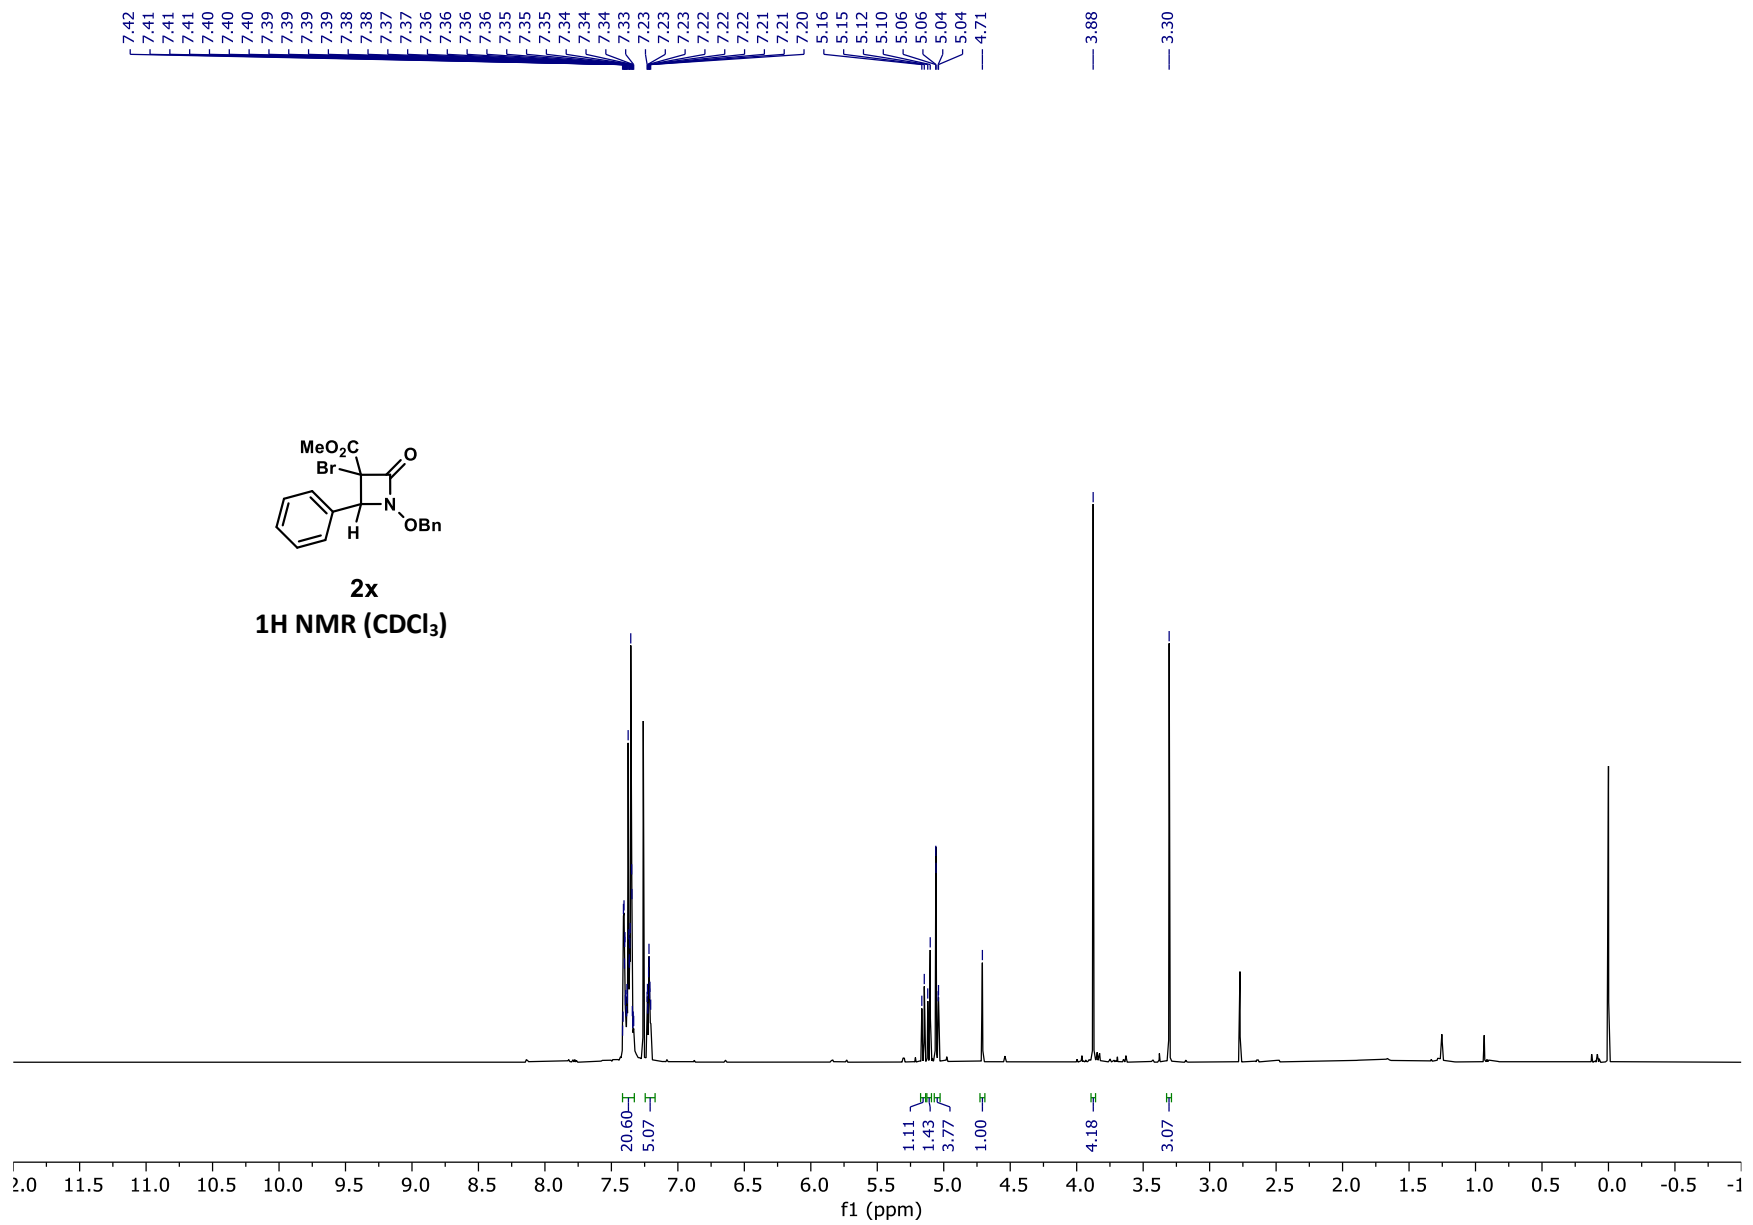

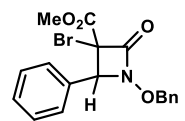

**2x**  
**<sup>13</sup>C NMR (CDCl<sub>3</sub>)**

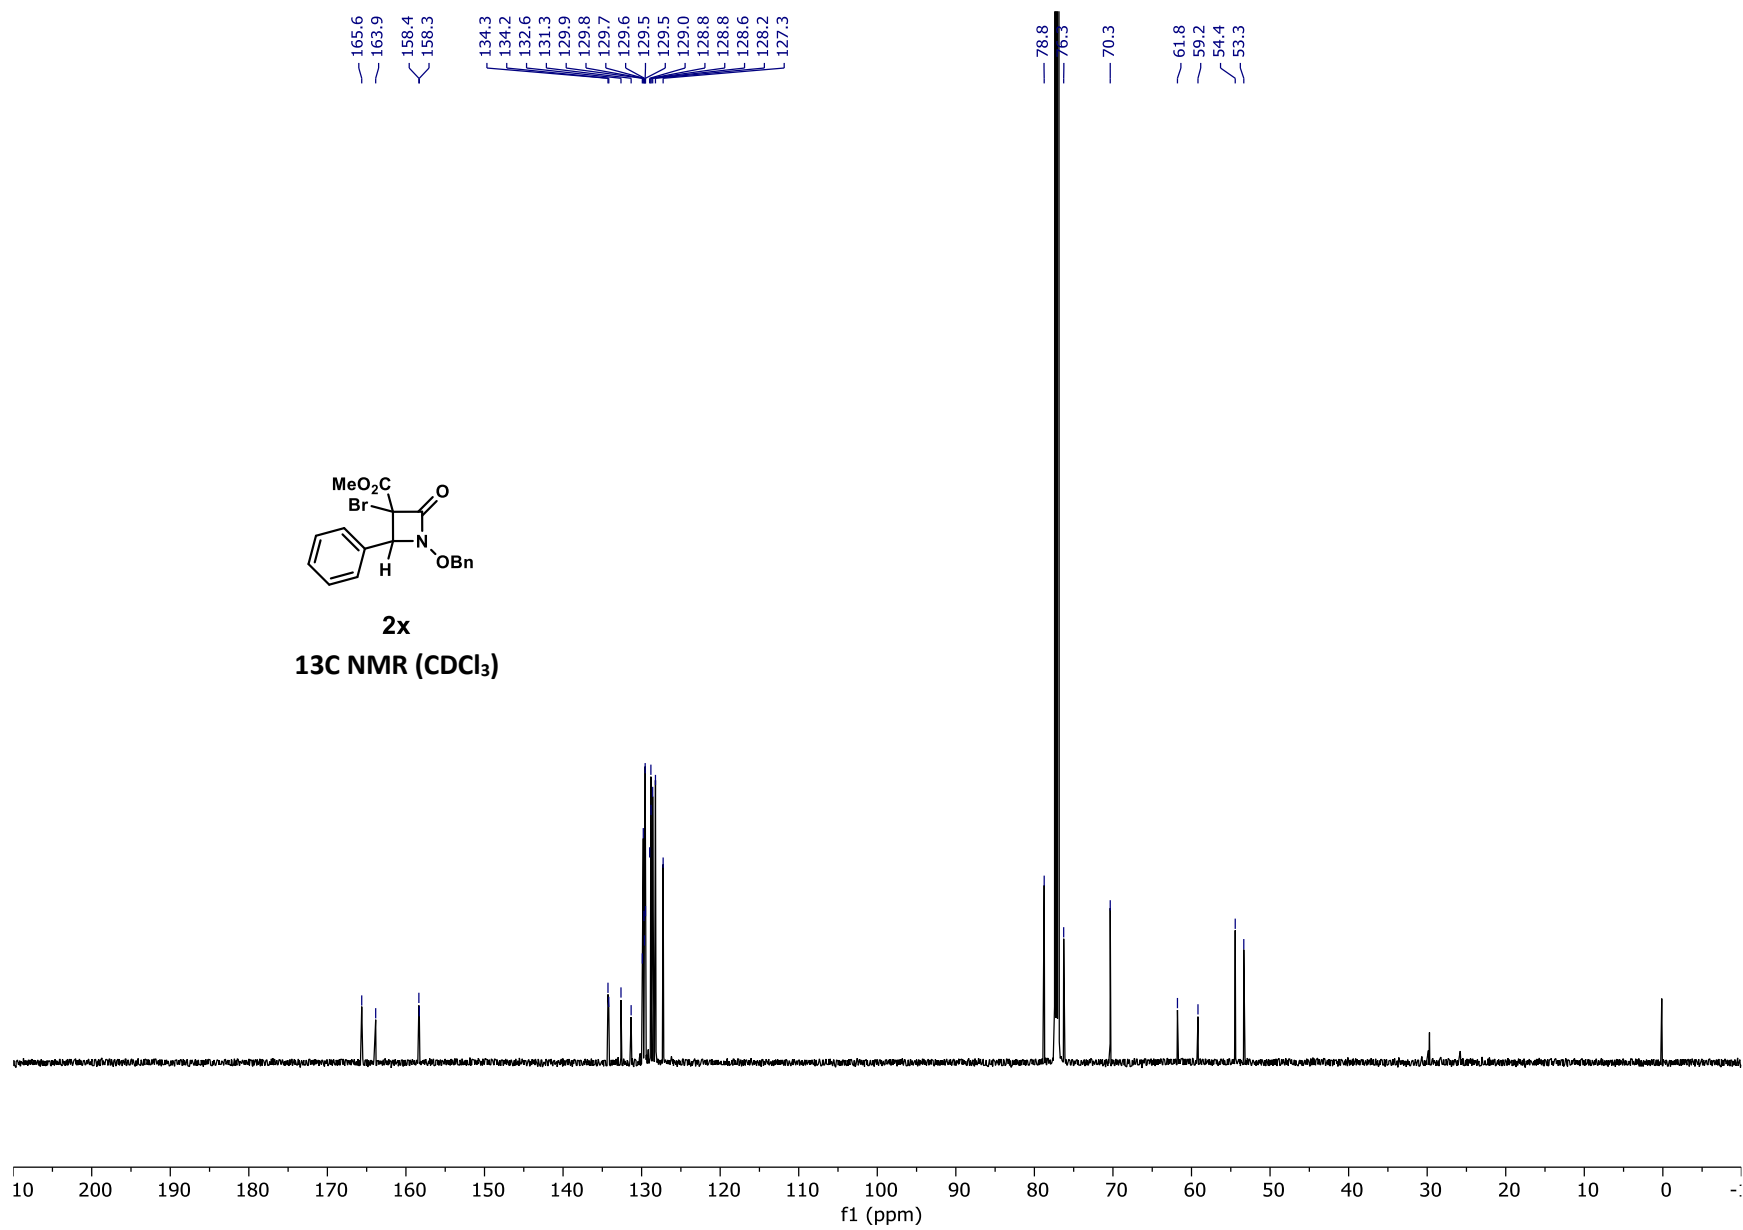

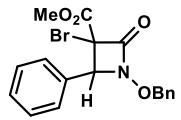

2x  
NOESY

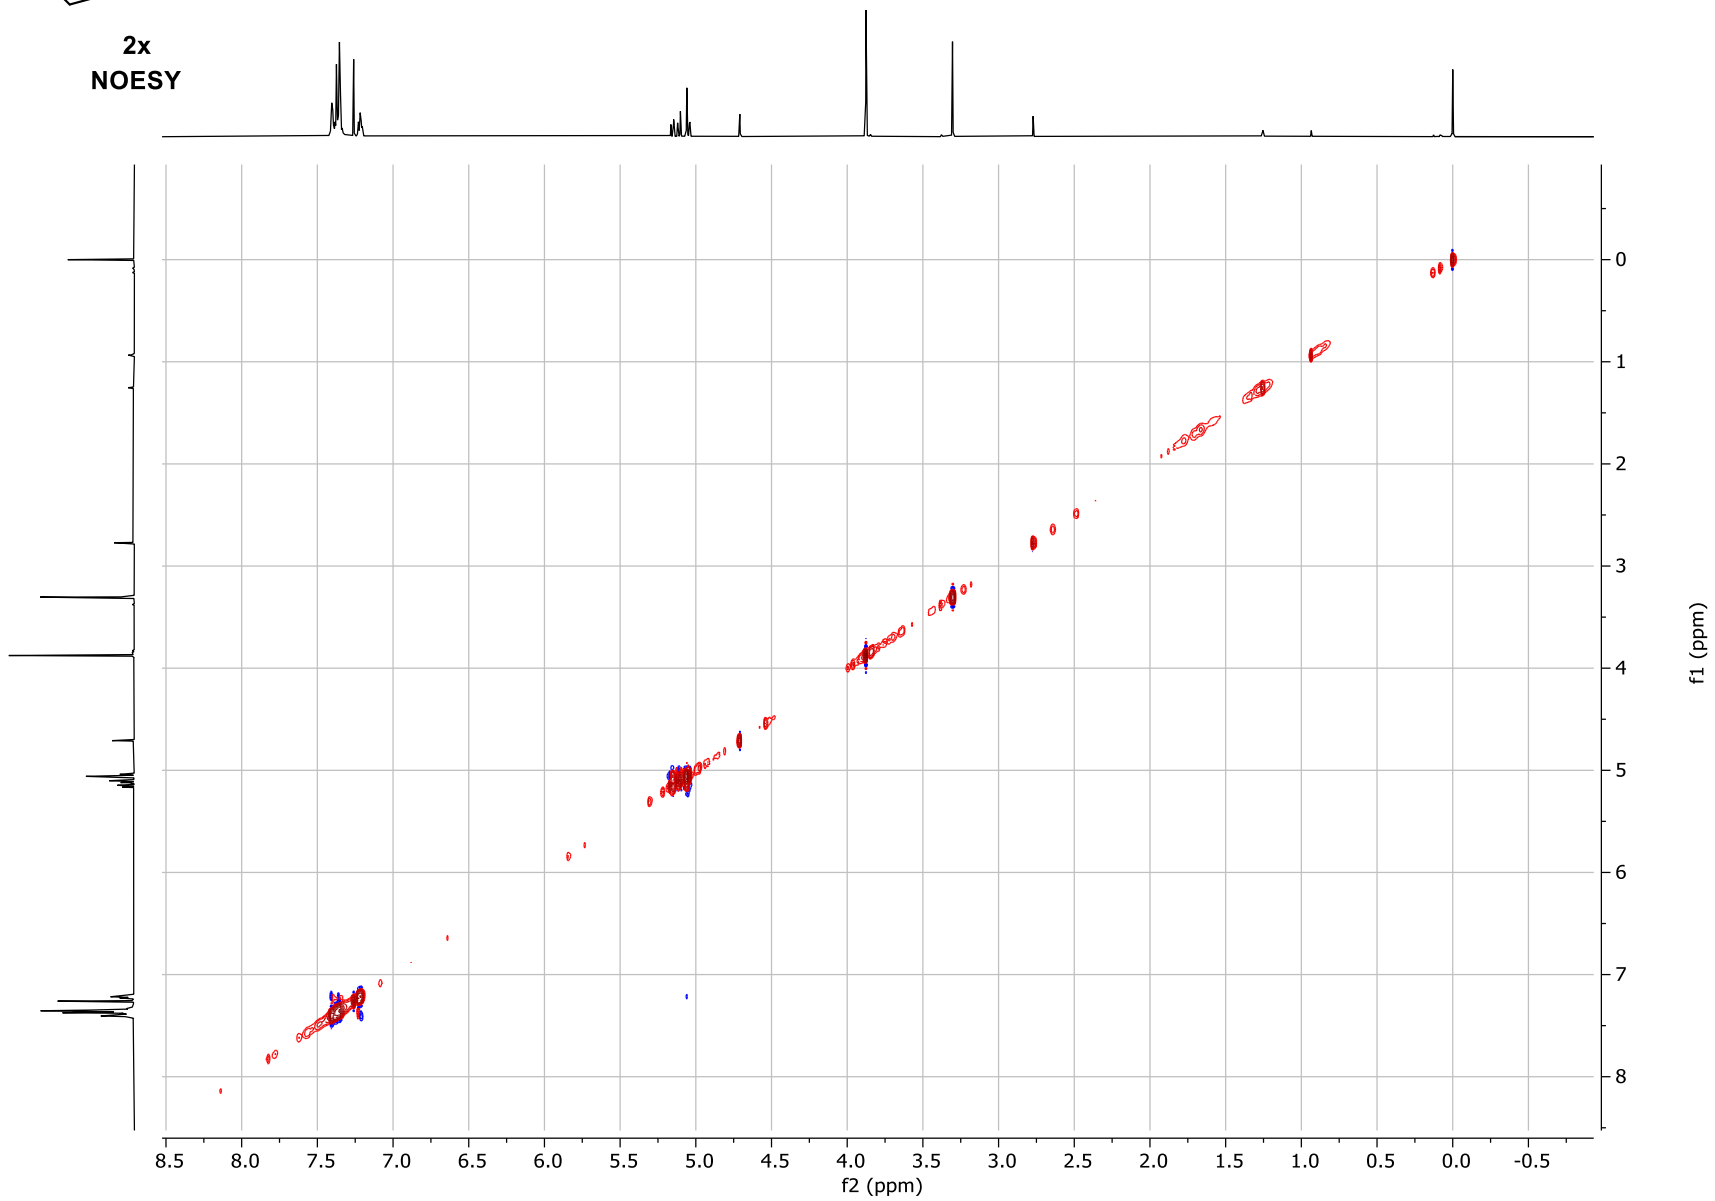

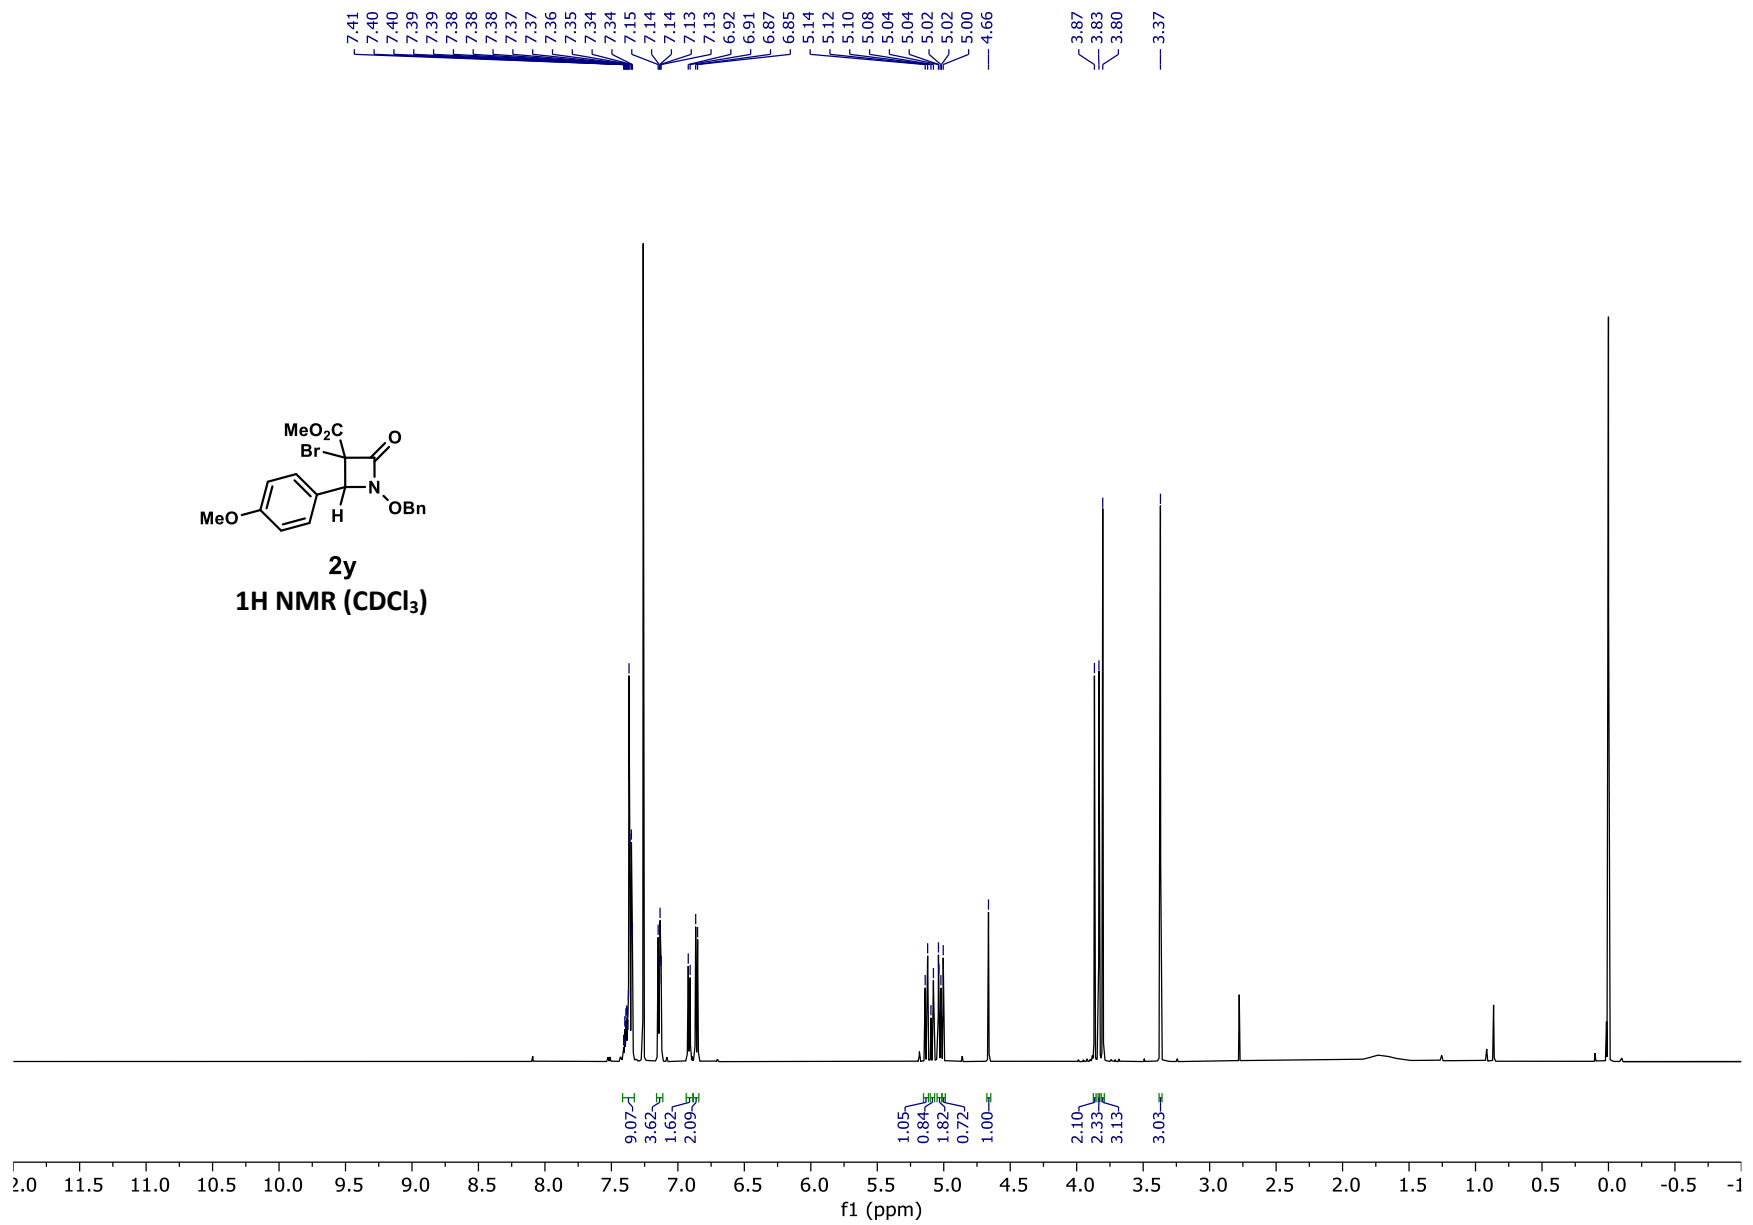



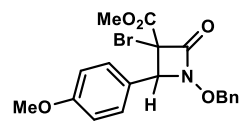

**2y**  
**<sup>13</sup>C NMR (CDCl<sub>3</sub>)**

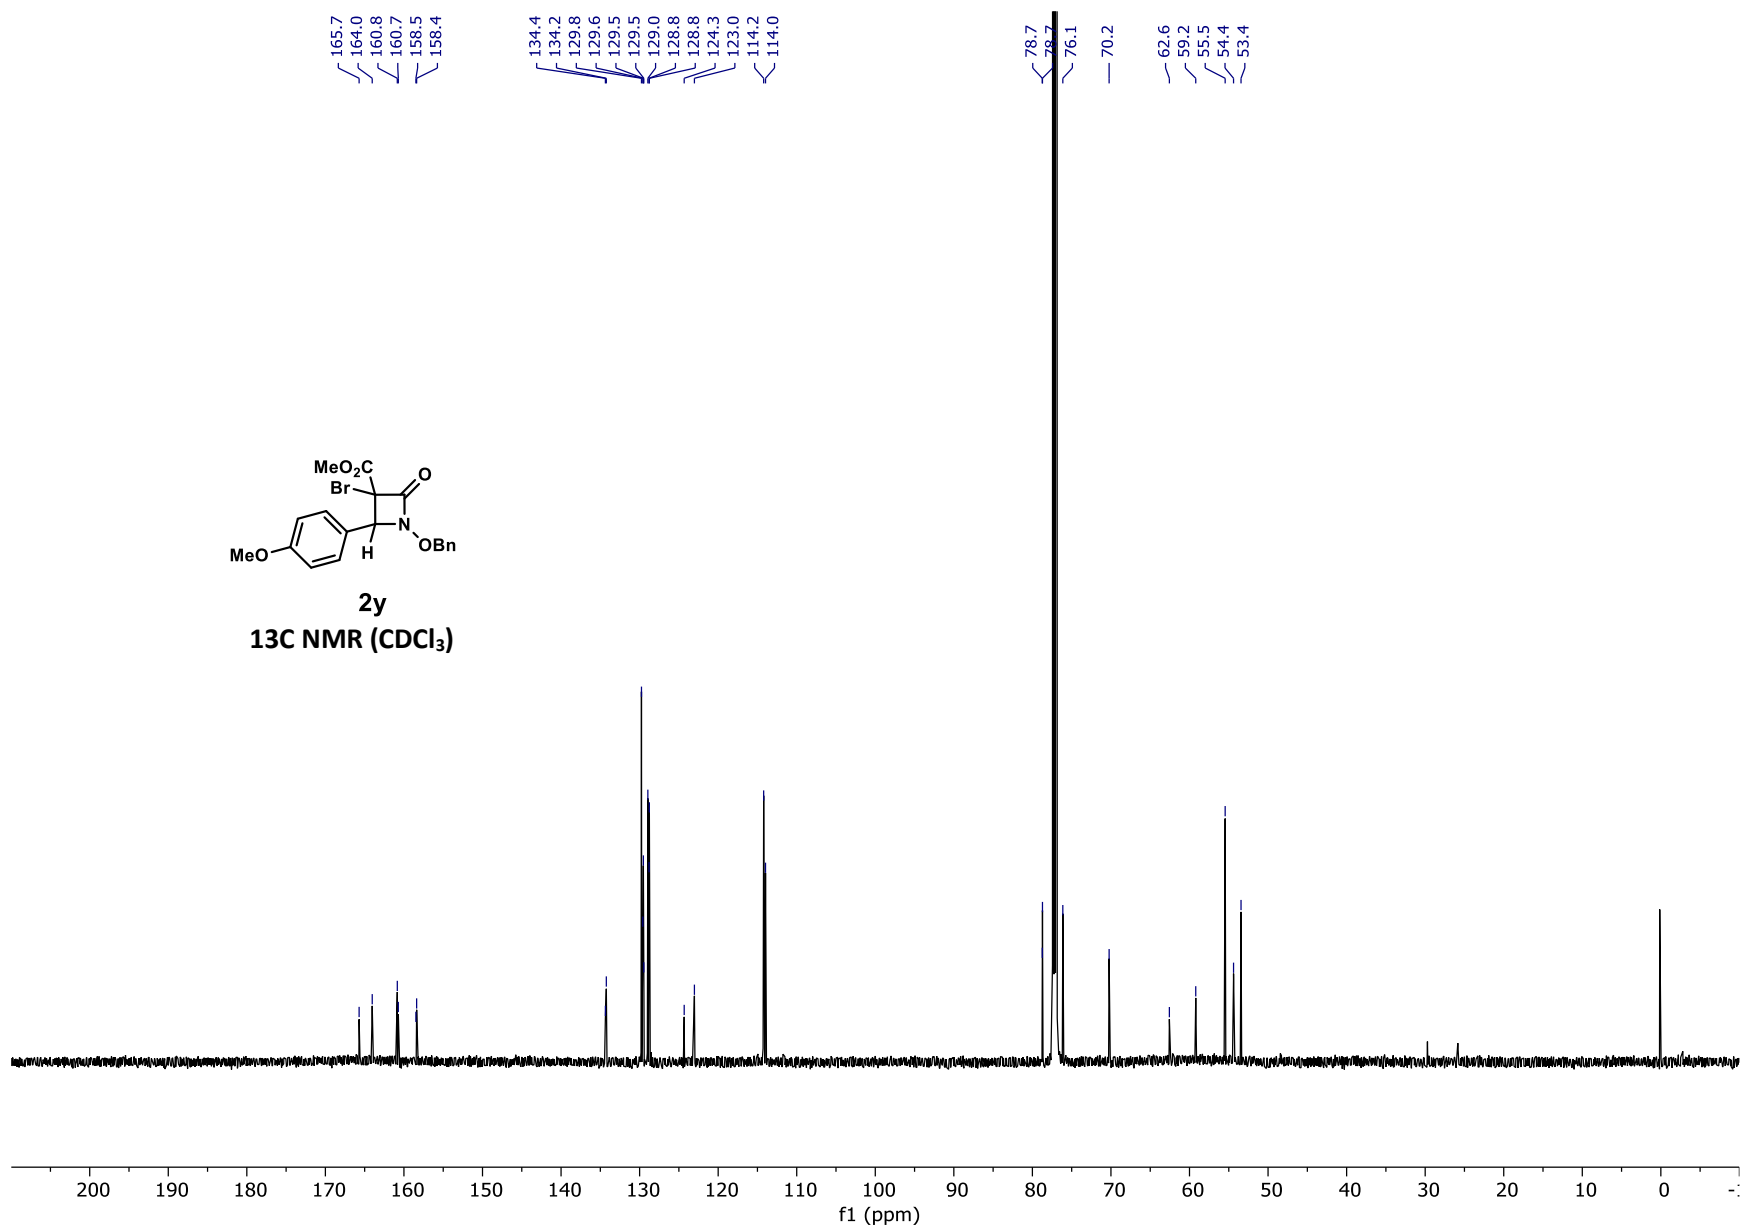

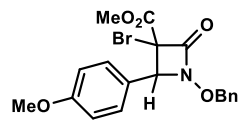

2y  
NOESY

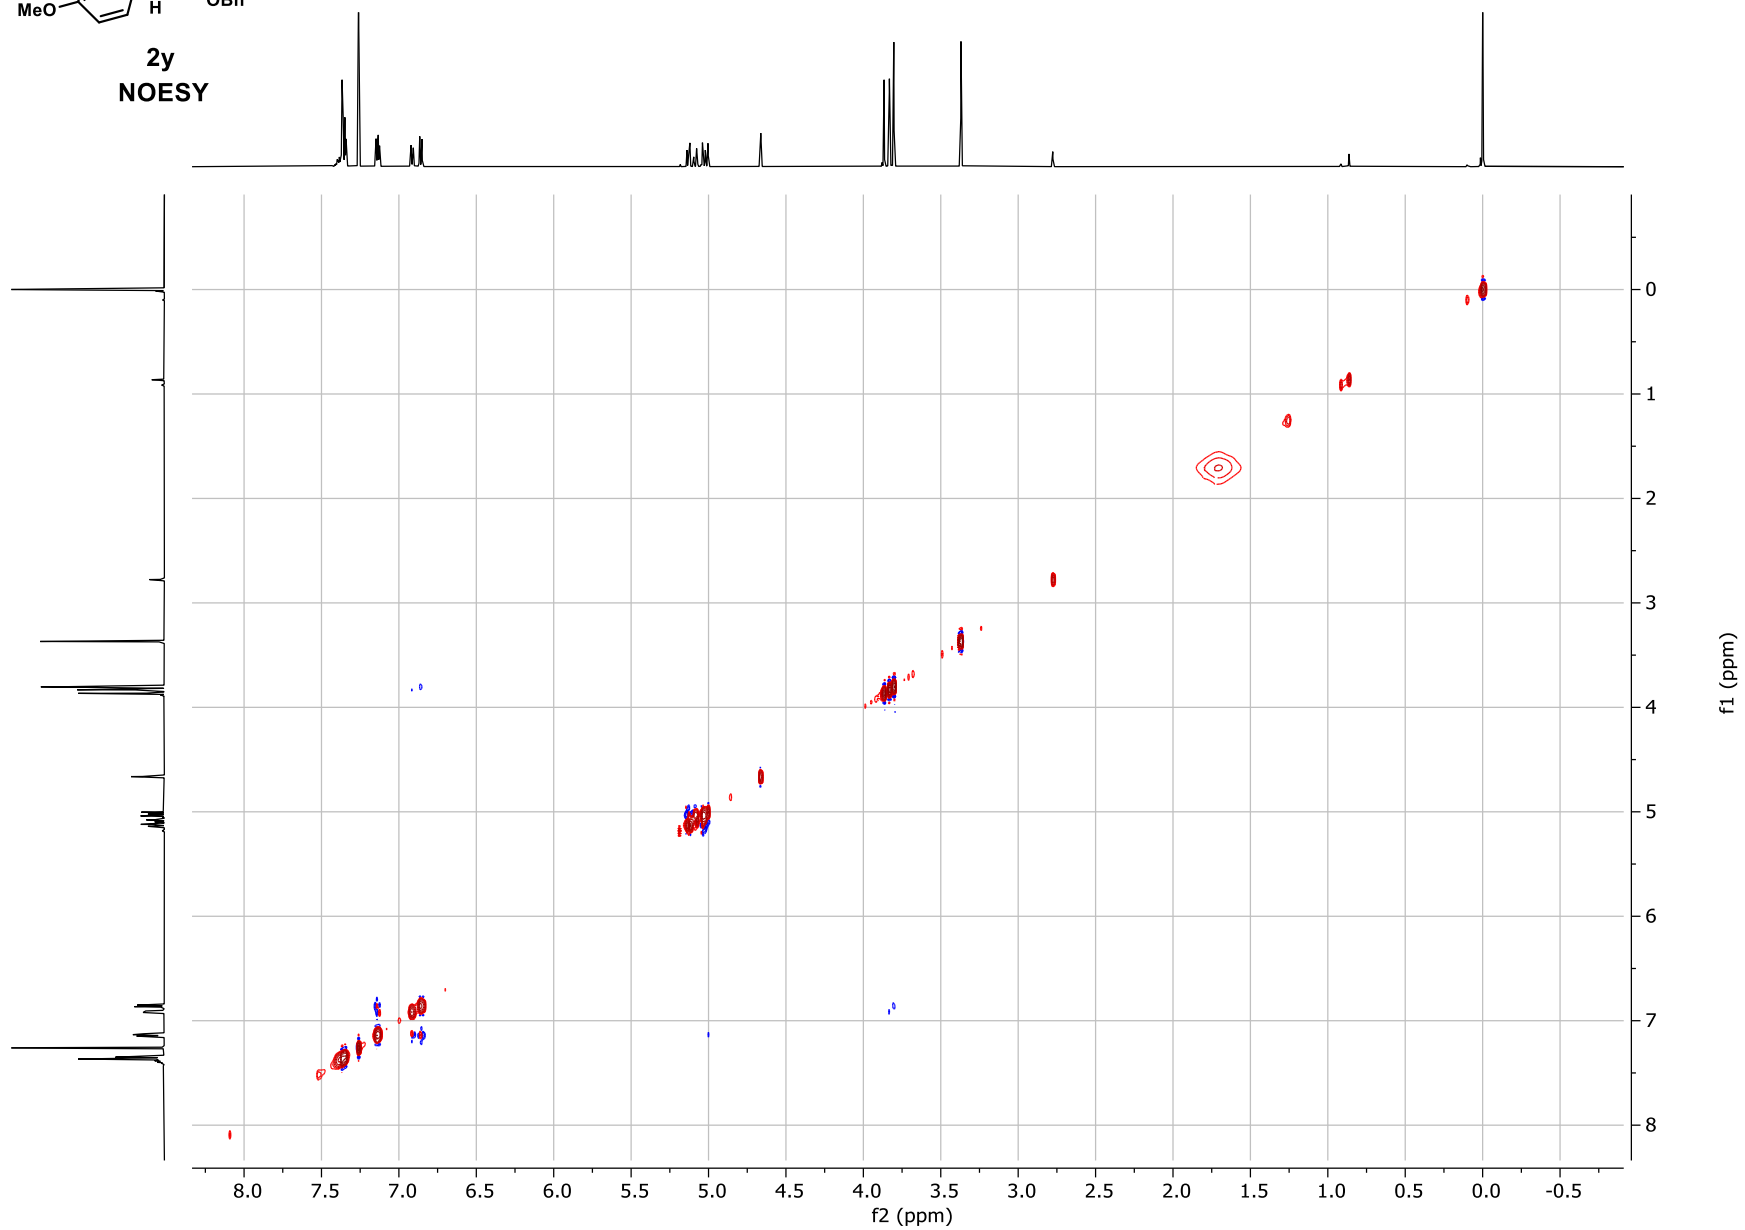

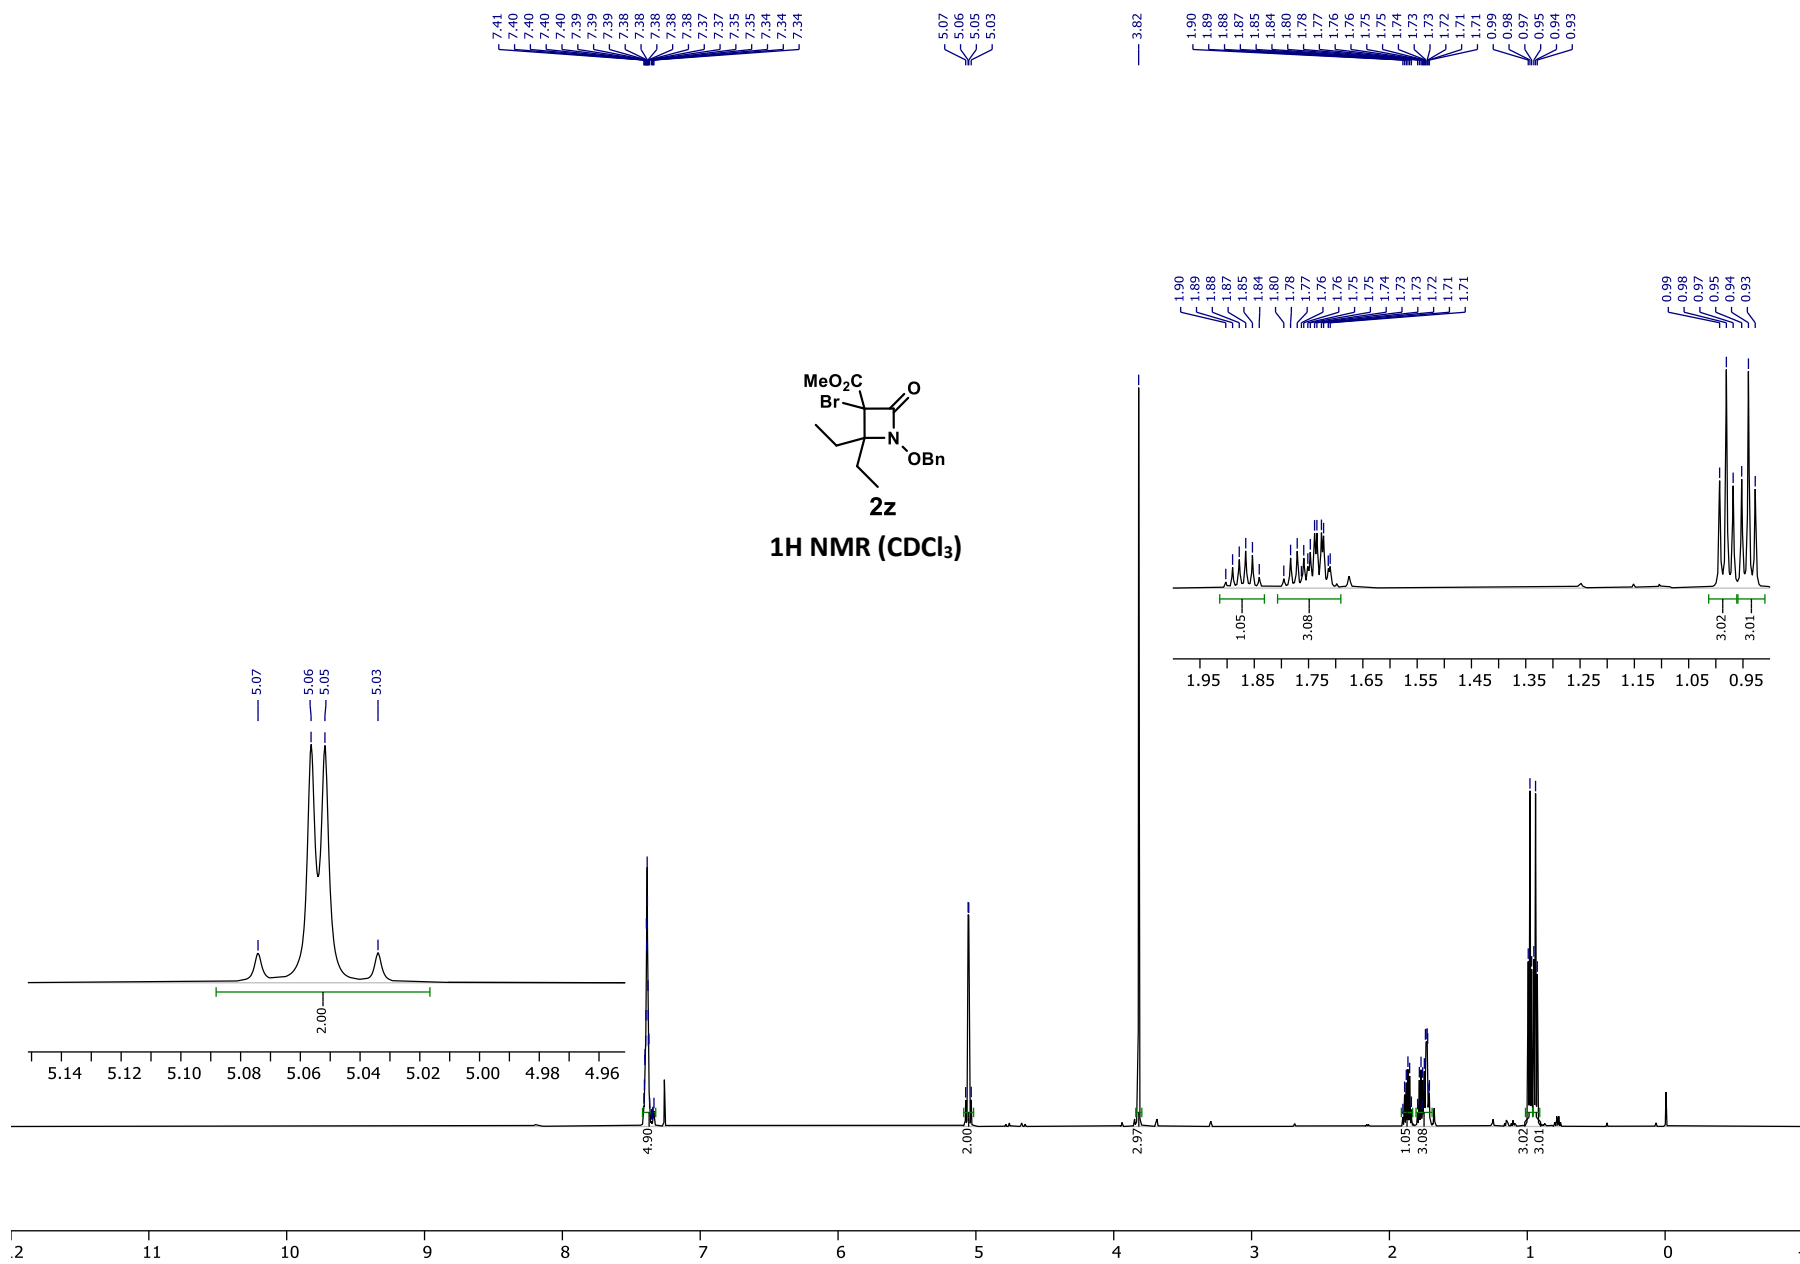

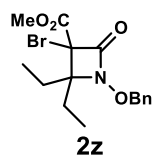

**<sup>13</sup>C NMR (CDCl<sub>3</sub>)**

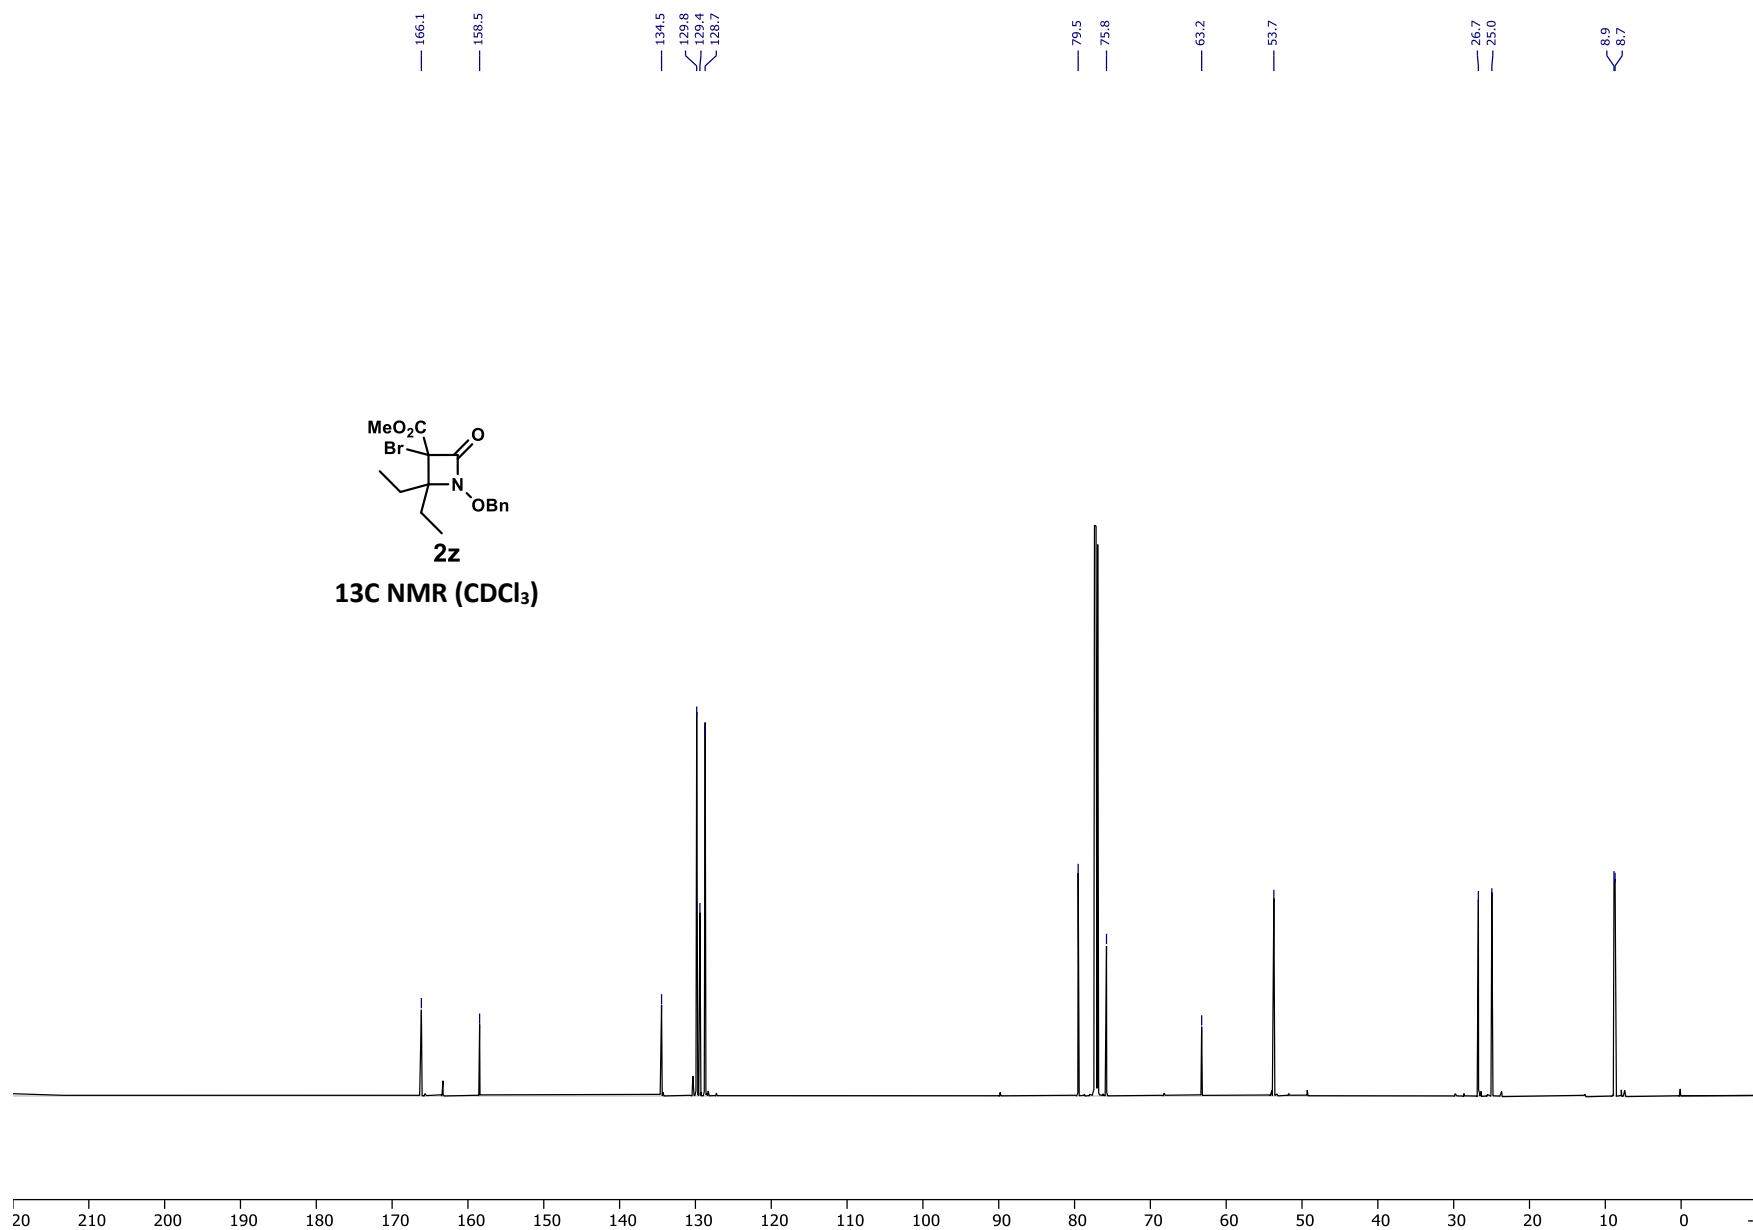

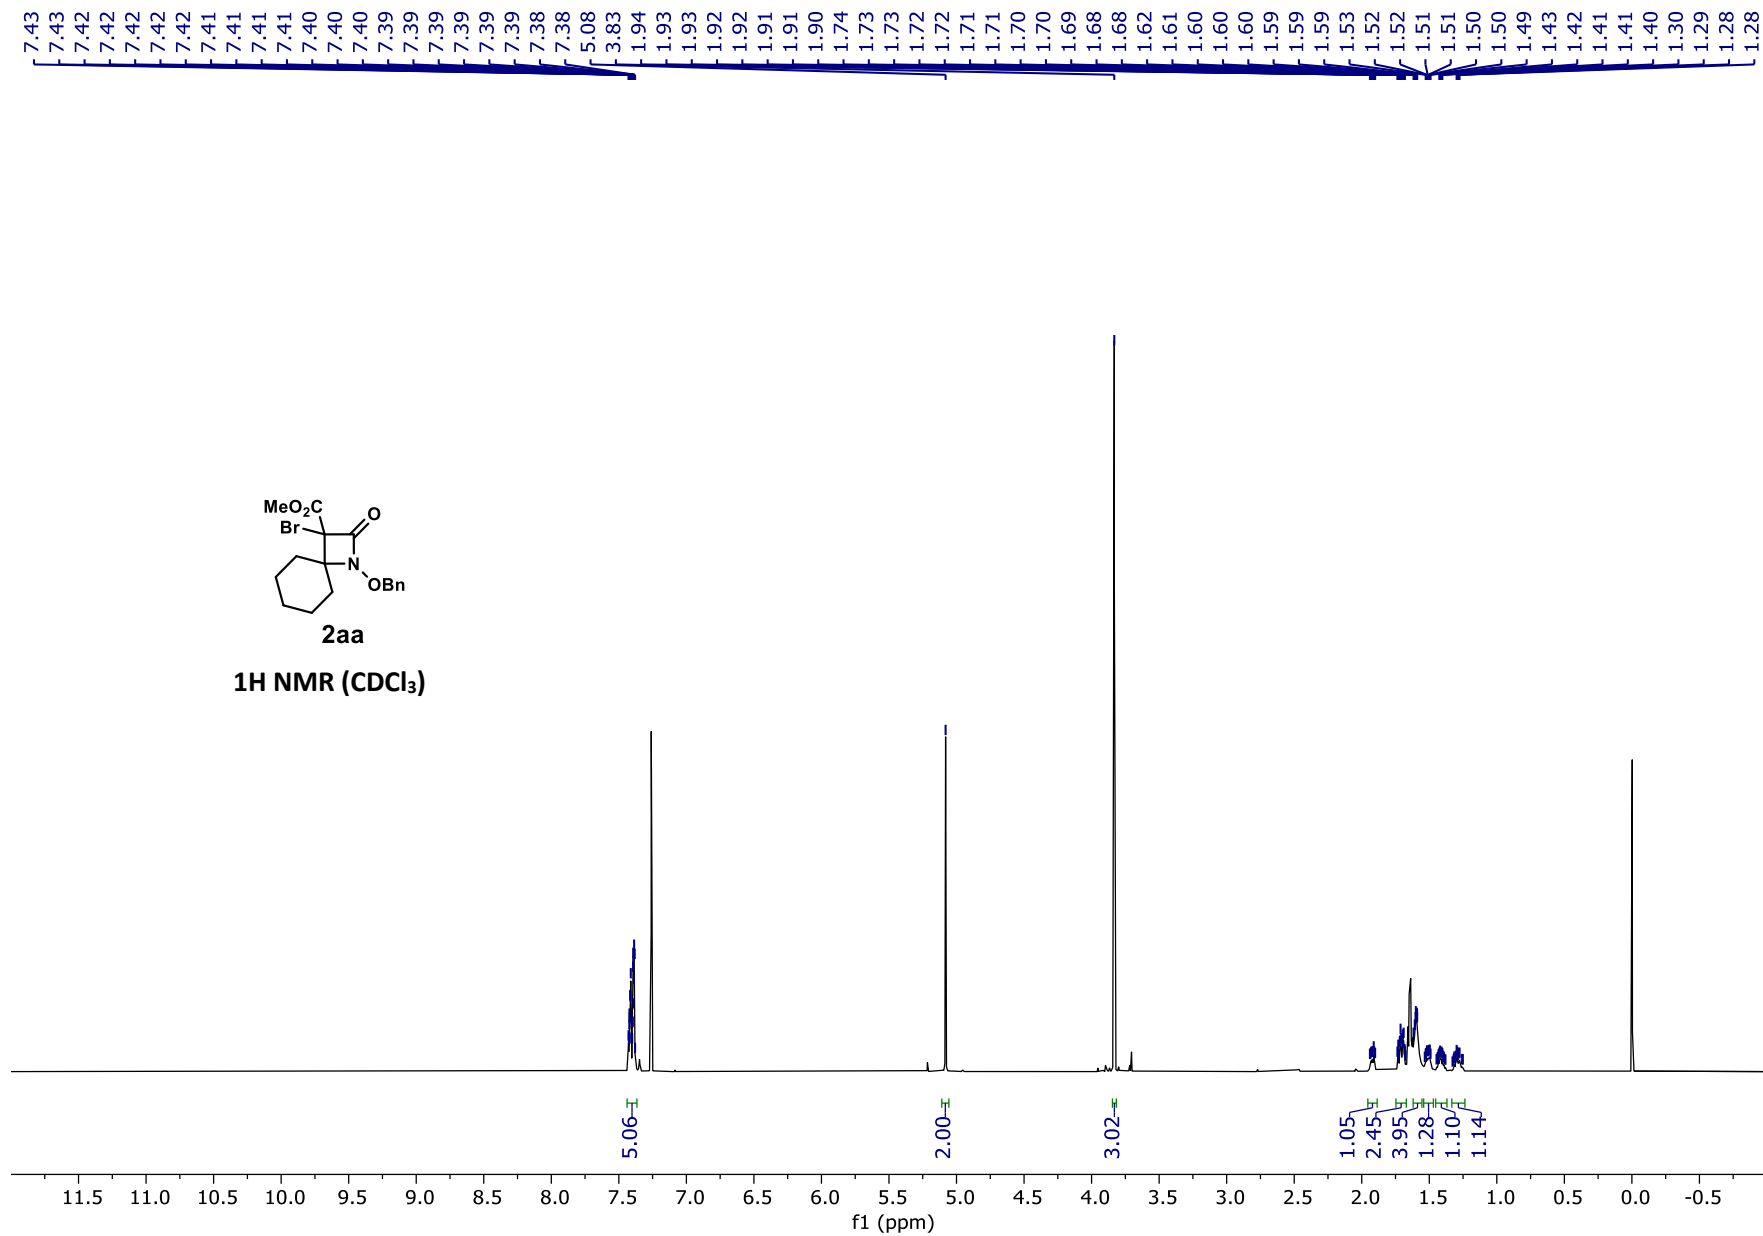

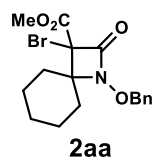

**<sup>13</sup>C NMR (CDCl<sub>3</sub>)**

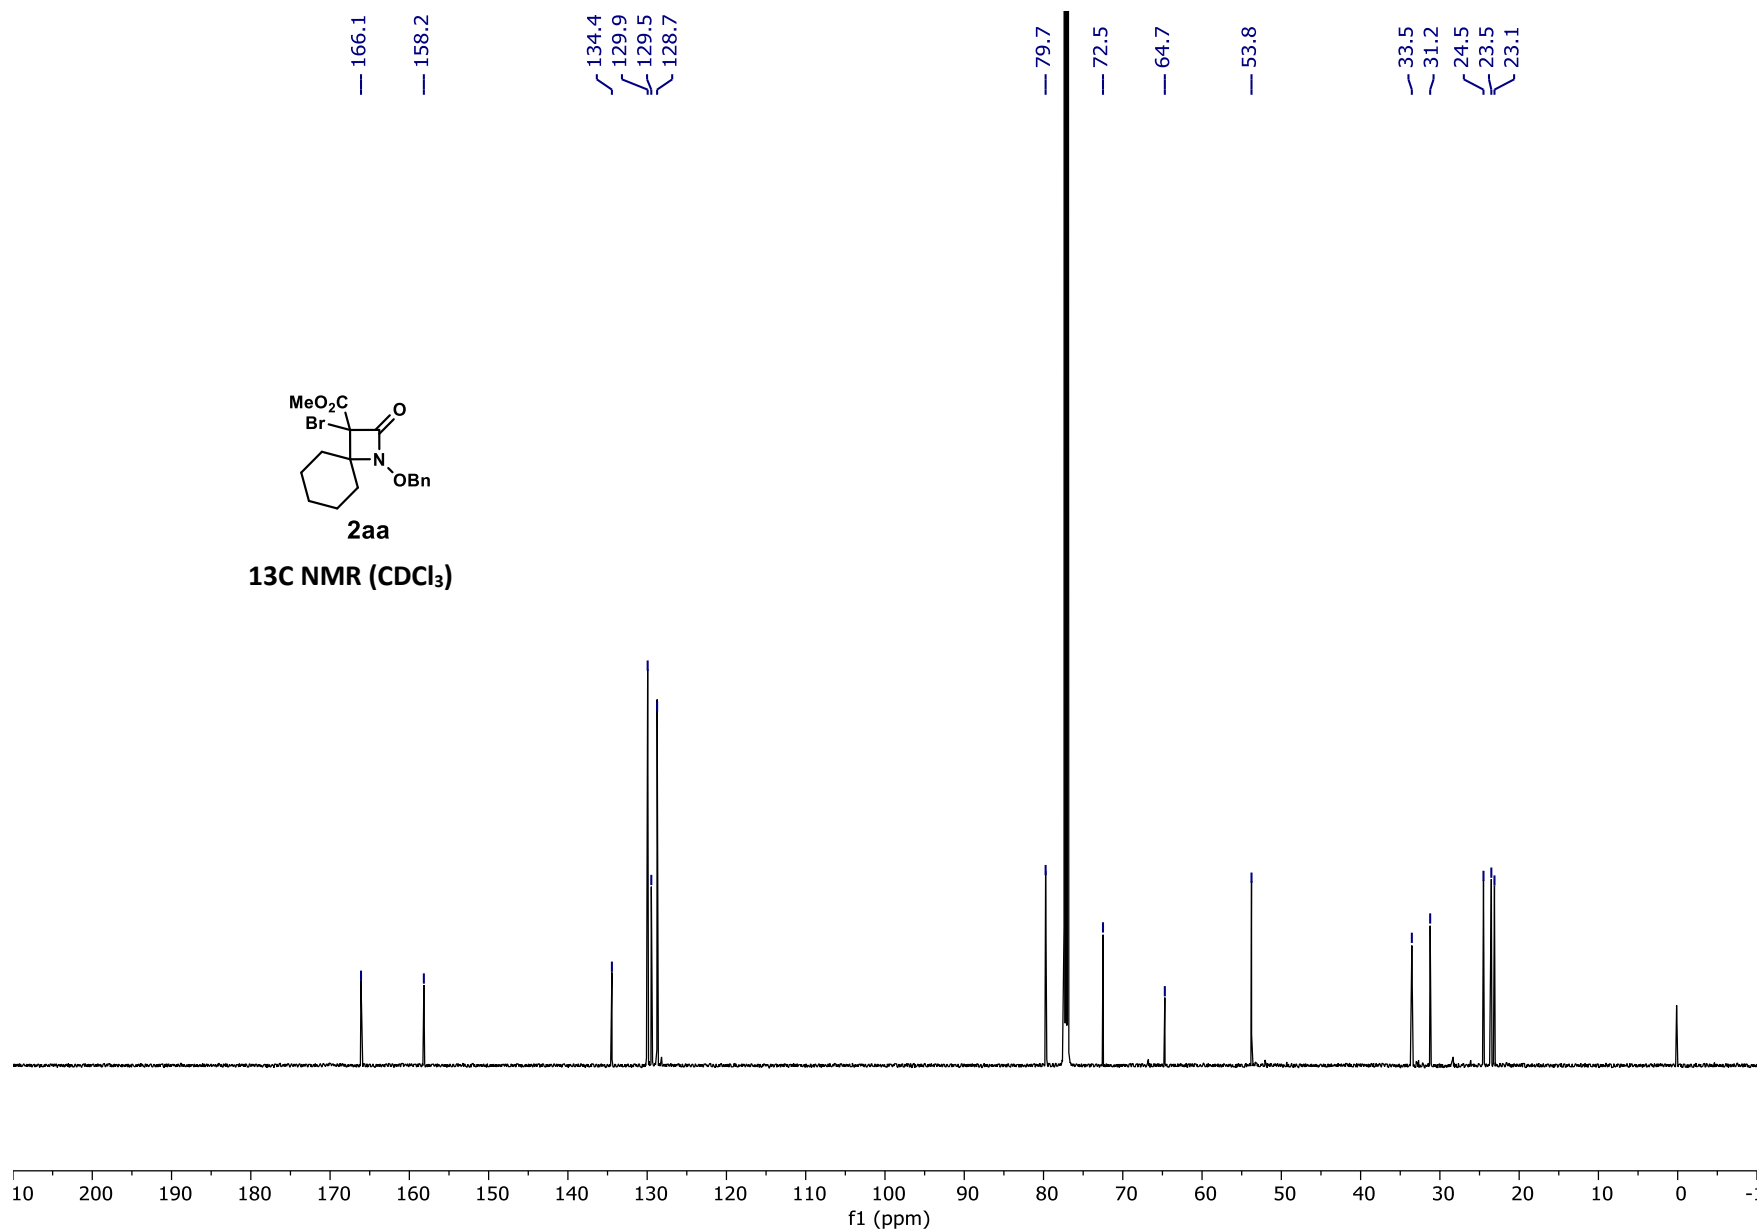

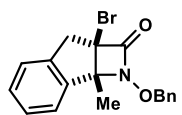

**2b**

**<sup>1</sup>H NMR (CDCl<sub>3</sub>)**

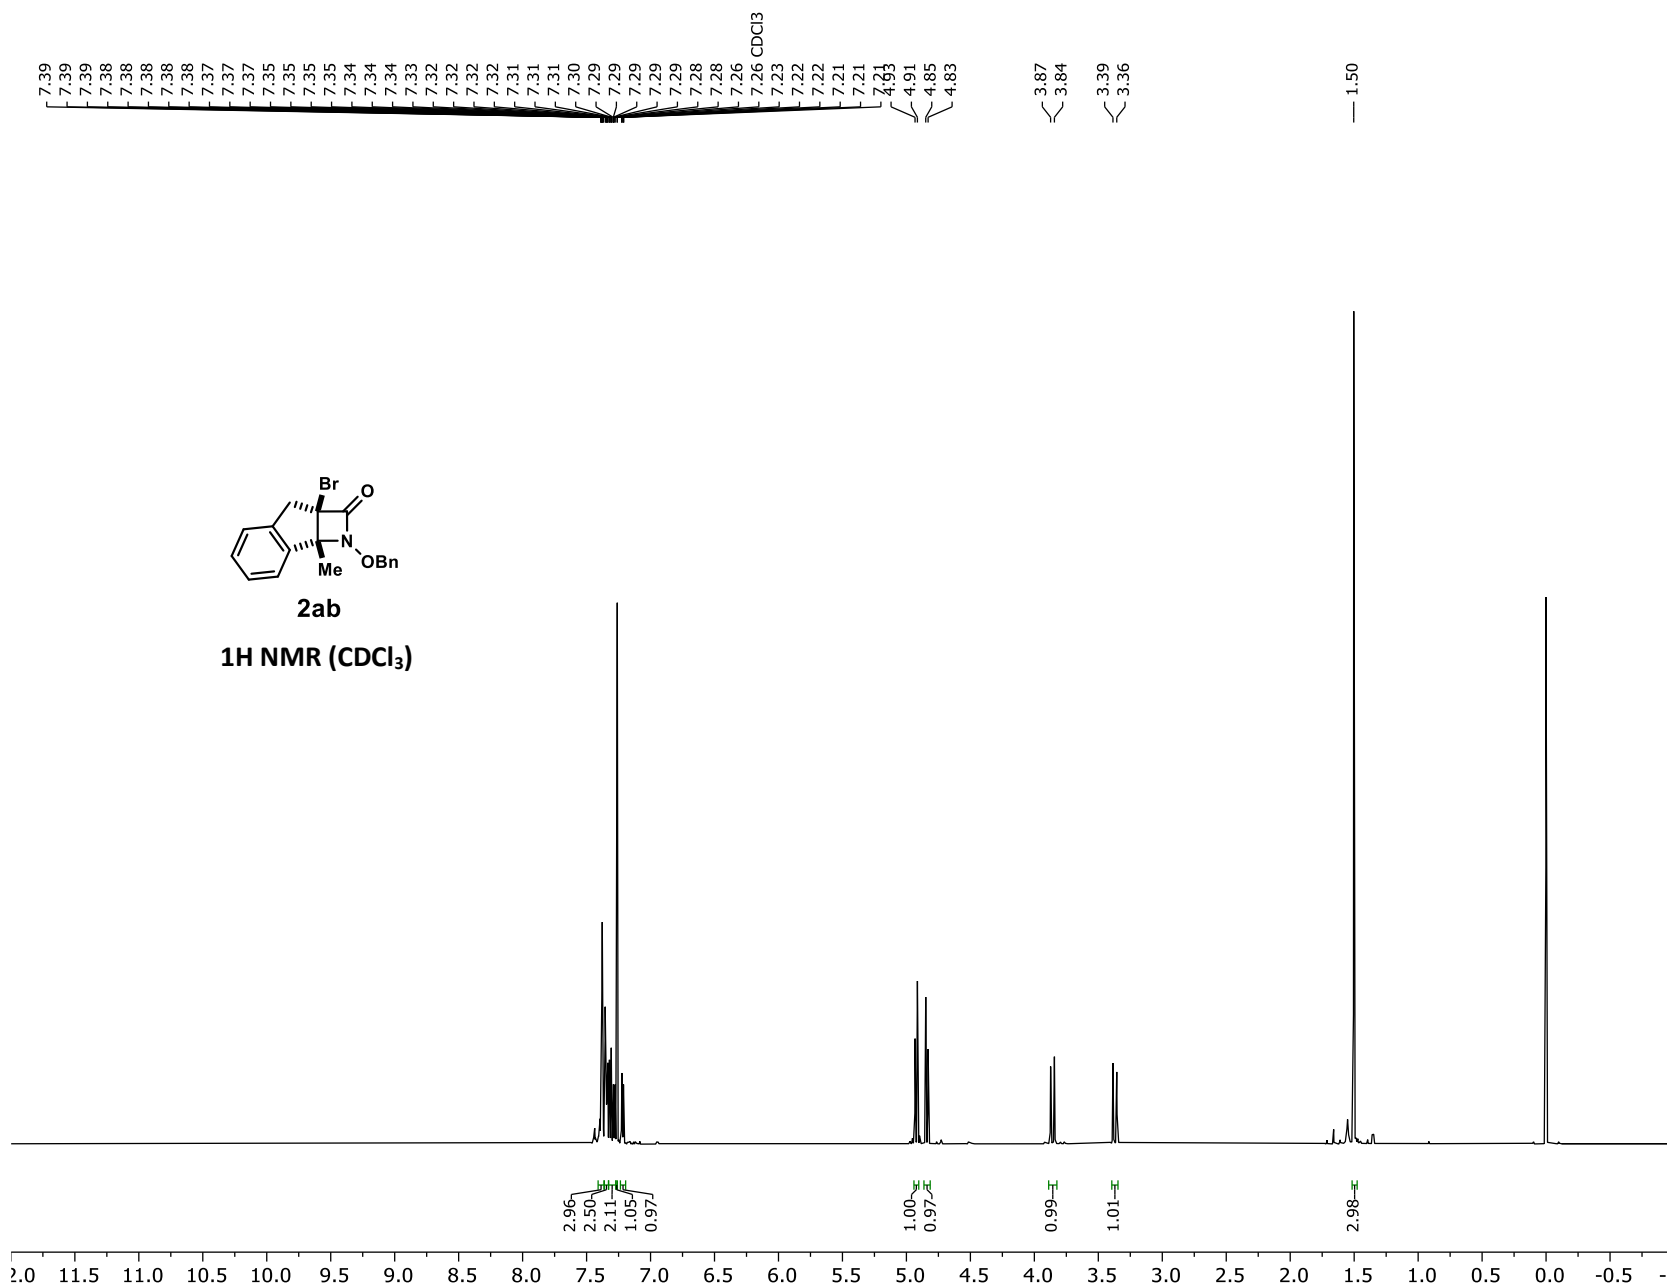

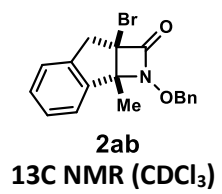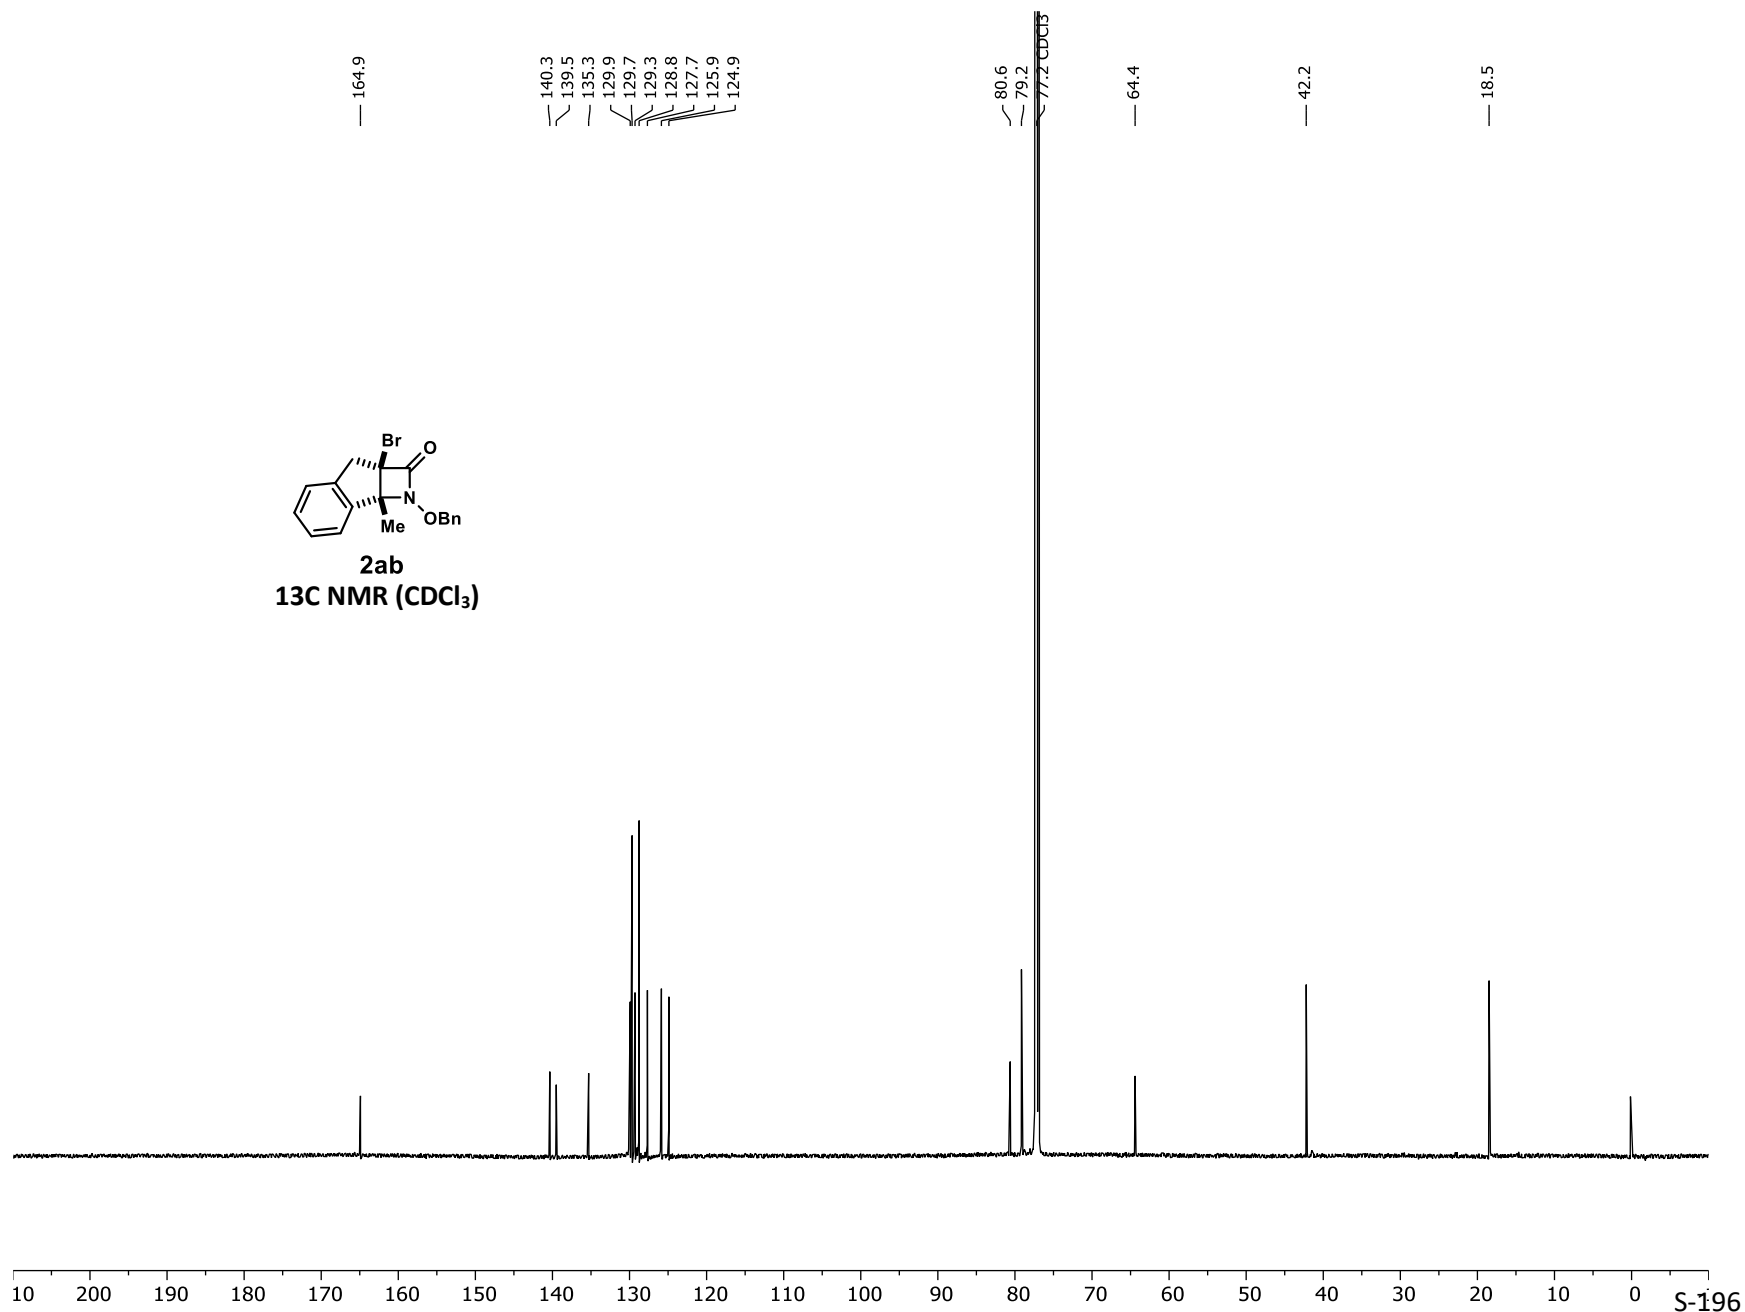



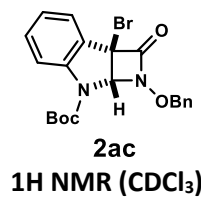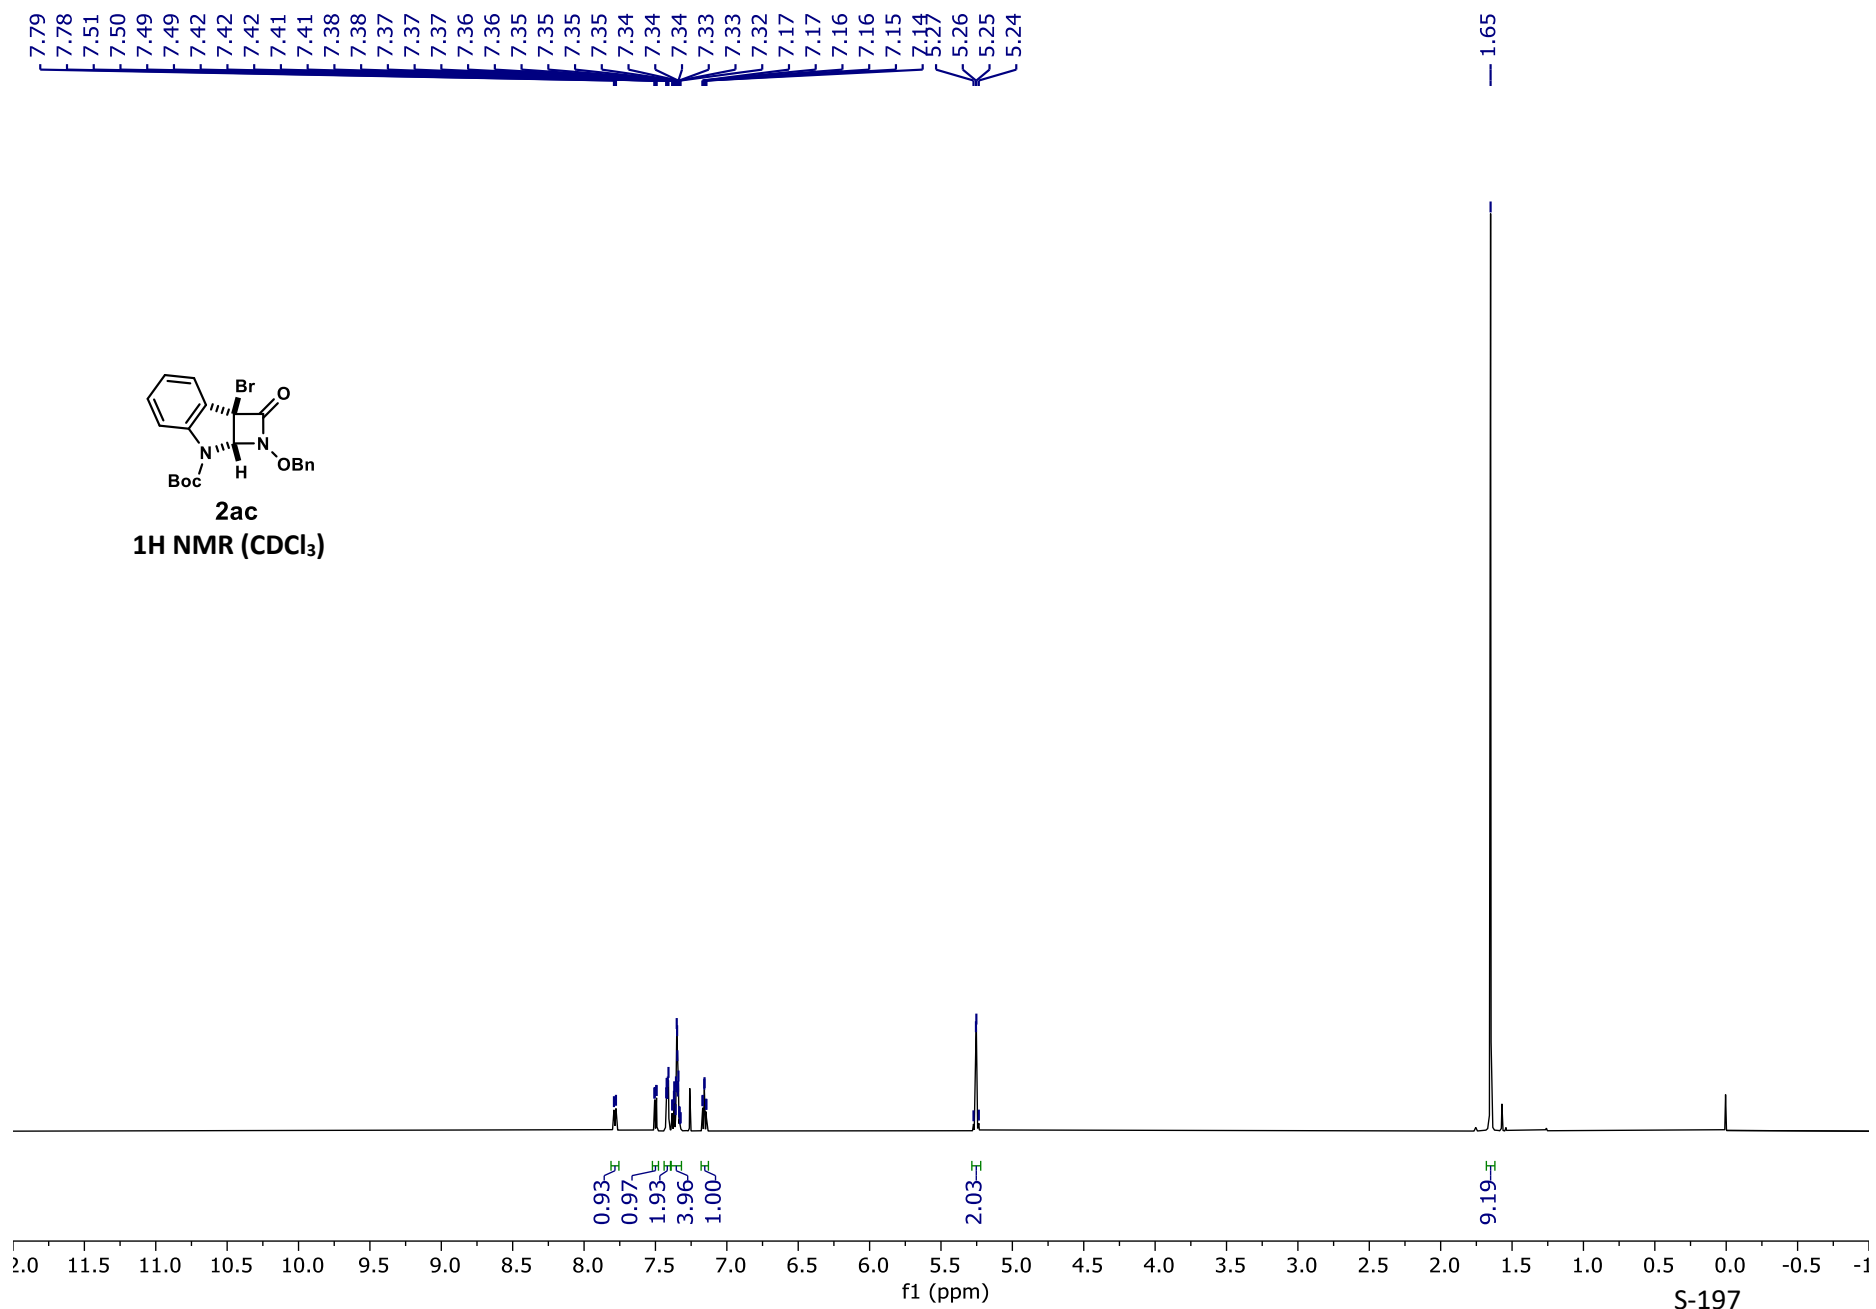

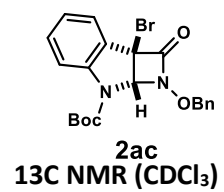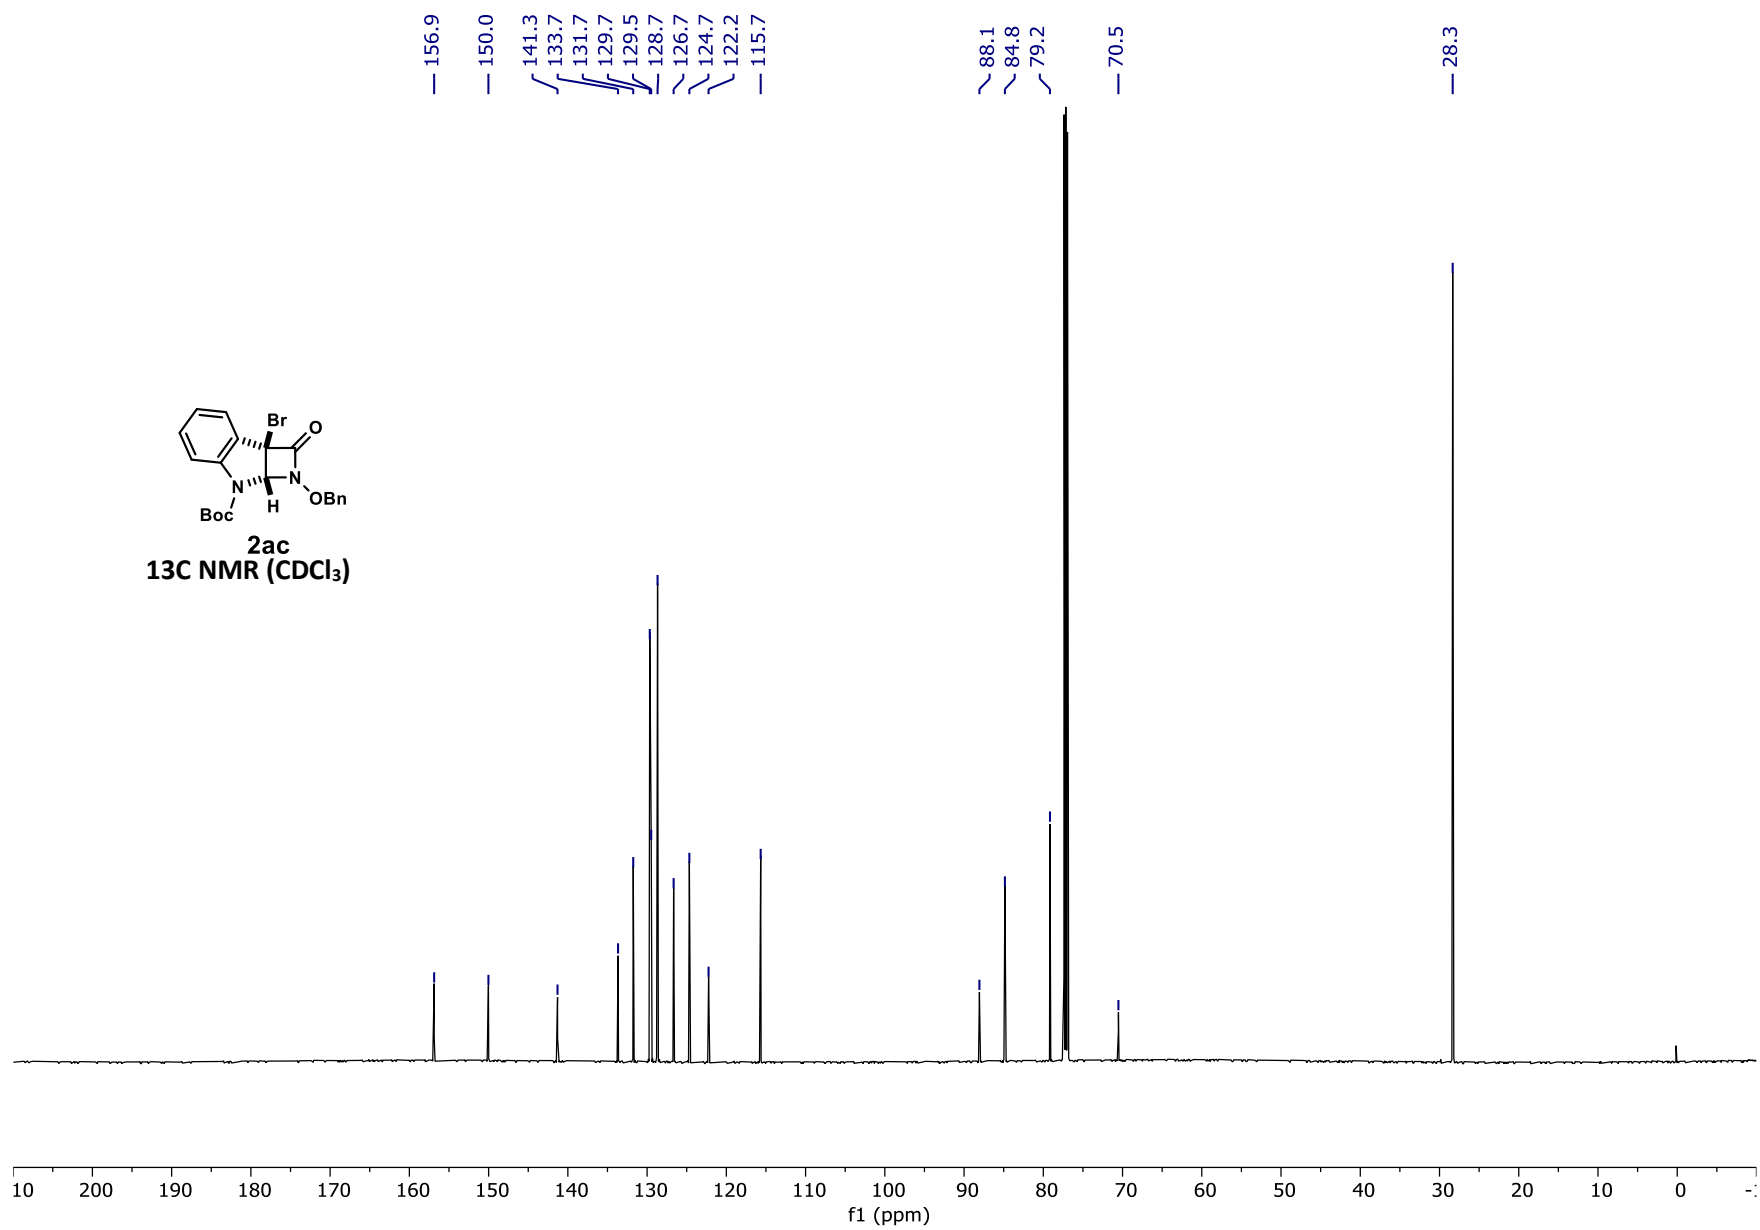

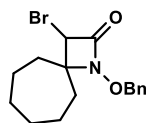

2ad

<sup>1</sup>H NMR (CDCl<sub>3</sub>)

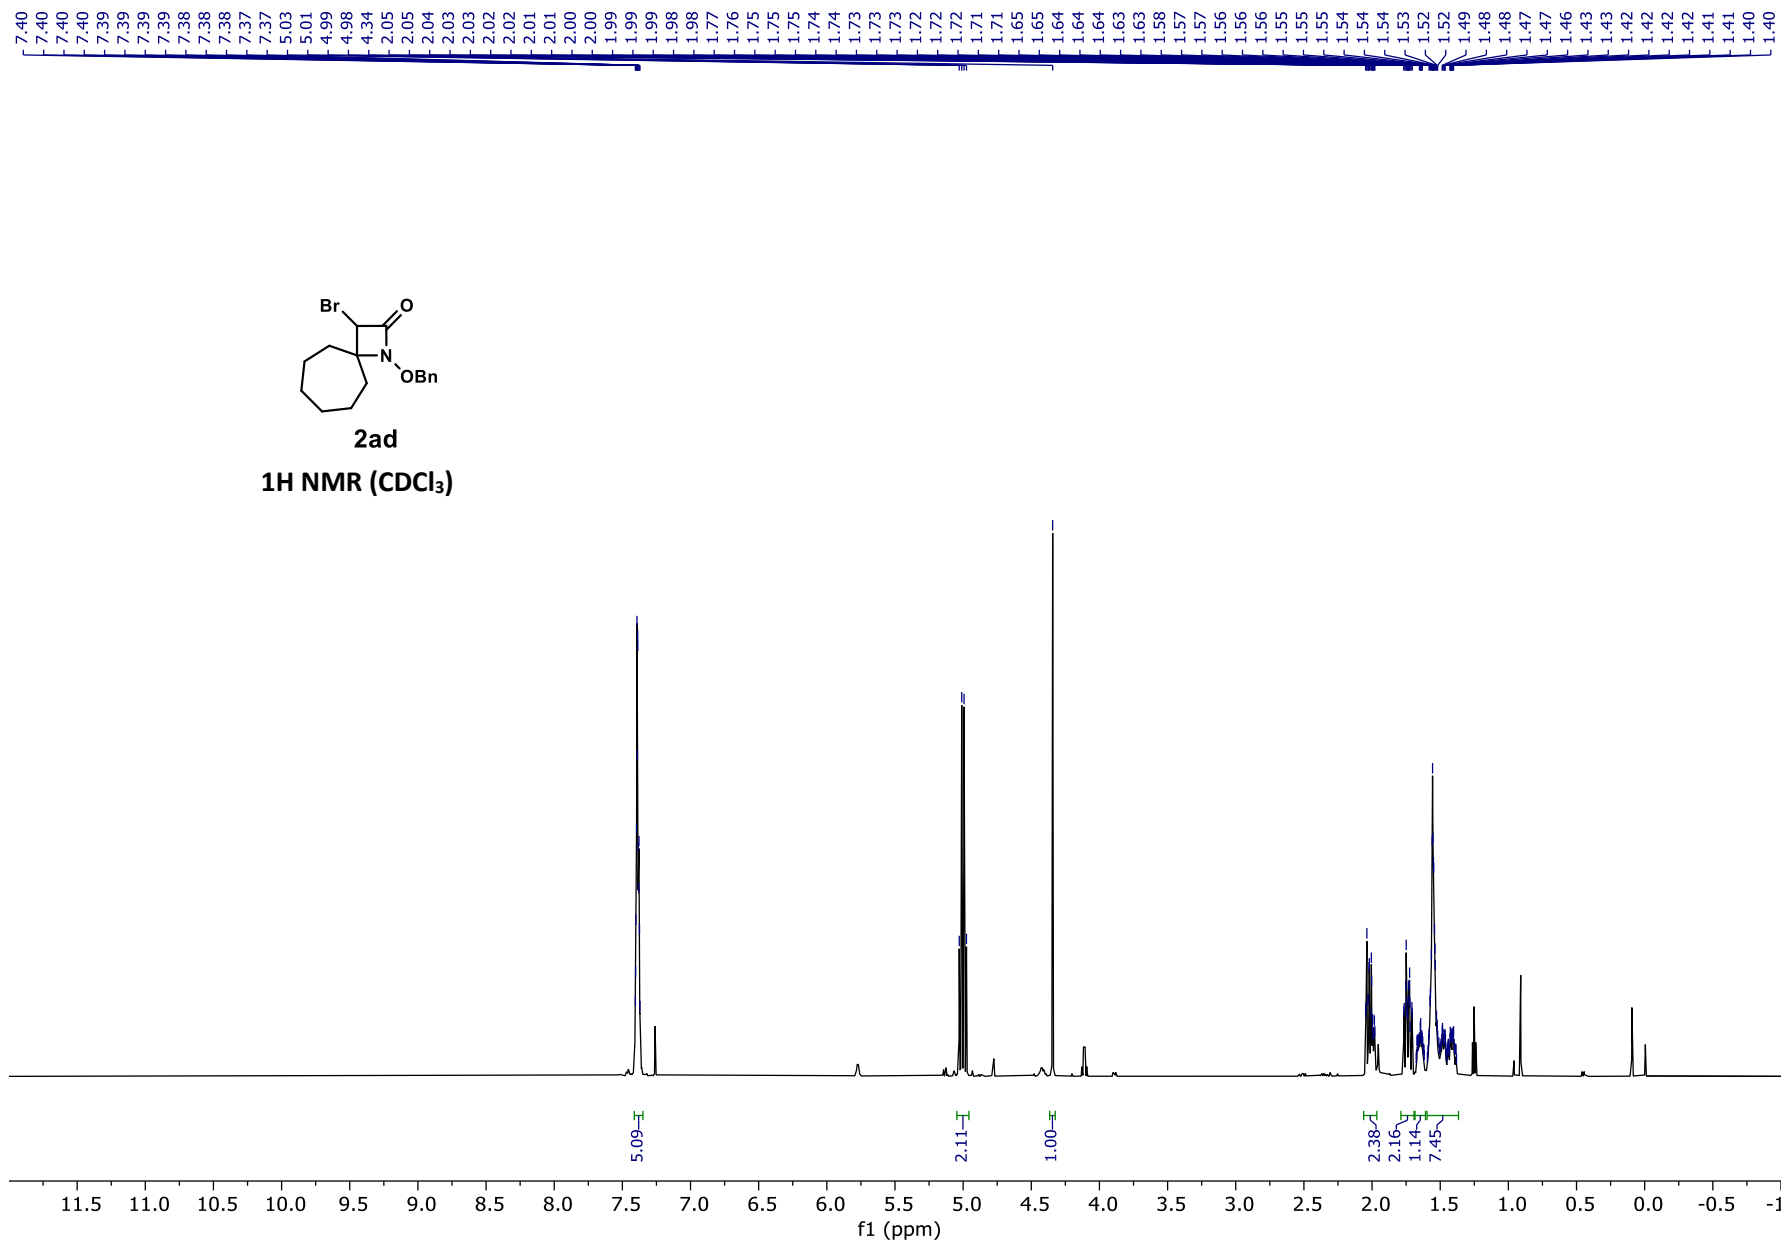

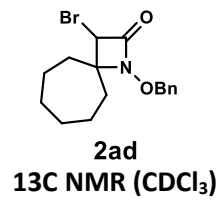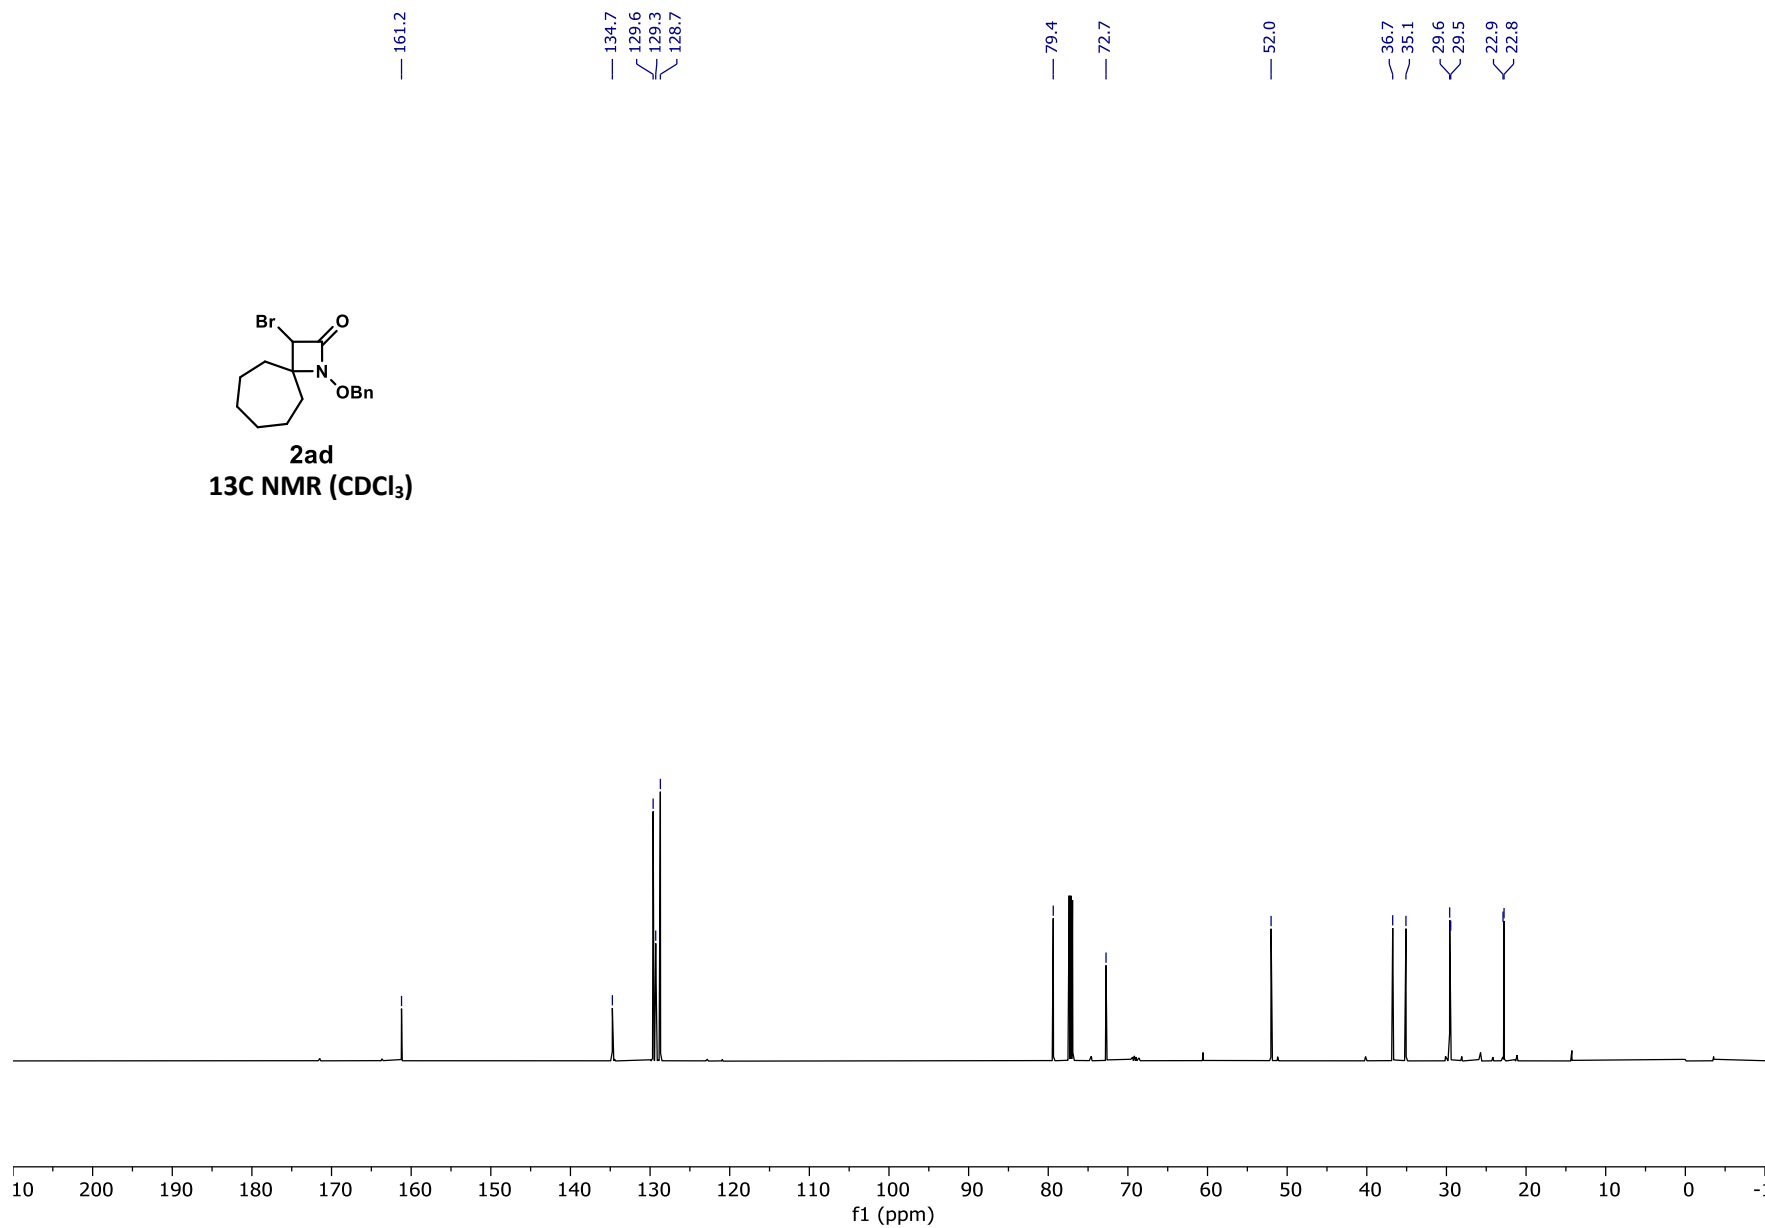

7.41  
7.41  
7.41  
7.40  
7.40  
7.40  
7.39  
7.39  
7.39  
7.38  
7.38  
7.38  
7.37  
7.37  
5.04  
5.02  
4.99  
4.97  
4.28  
1.89  
1.88  
1.87  
1.87  
1.86  
1.86  
1.85  
1.84  
1.81  
1.81  
1.80  
1.80  
1.80  
1.79  
1.79  
1.79  
1.78  
1.78  
1.78  
1.77  
1.77  
1.67  
1.66  
1.66  
1.66  
1.61  
1.60  
1.60  
1.60  
1.60  
1.59  
1.59  
1.59  
1.59  
1.58  
1.58  
1.57  
1.53  
1.51  
1.51  
1.50  
1.49  
1.49  
1.49  
1.48  
1.34  
1.32  
1.31  
1.19  
1.18

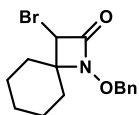

**2ae**  
**<sup>1</sup>H NMR (CDCl<sub>3</sub>)**

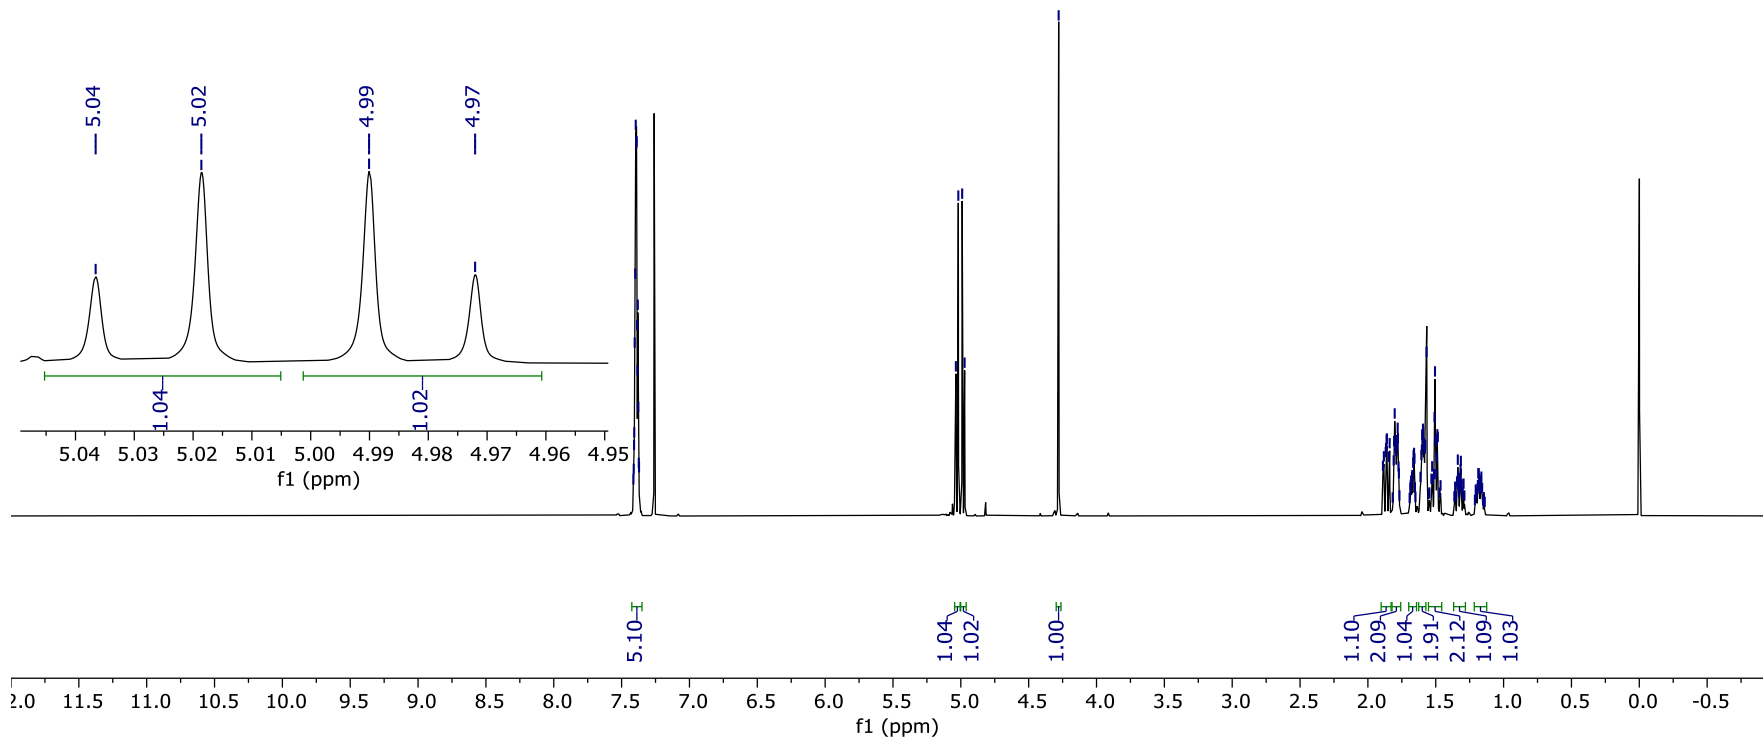

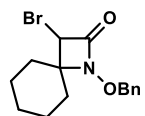

**2ae**  
**<sup>13</sup>C NMR (CDCl<sub>3</sub>)**

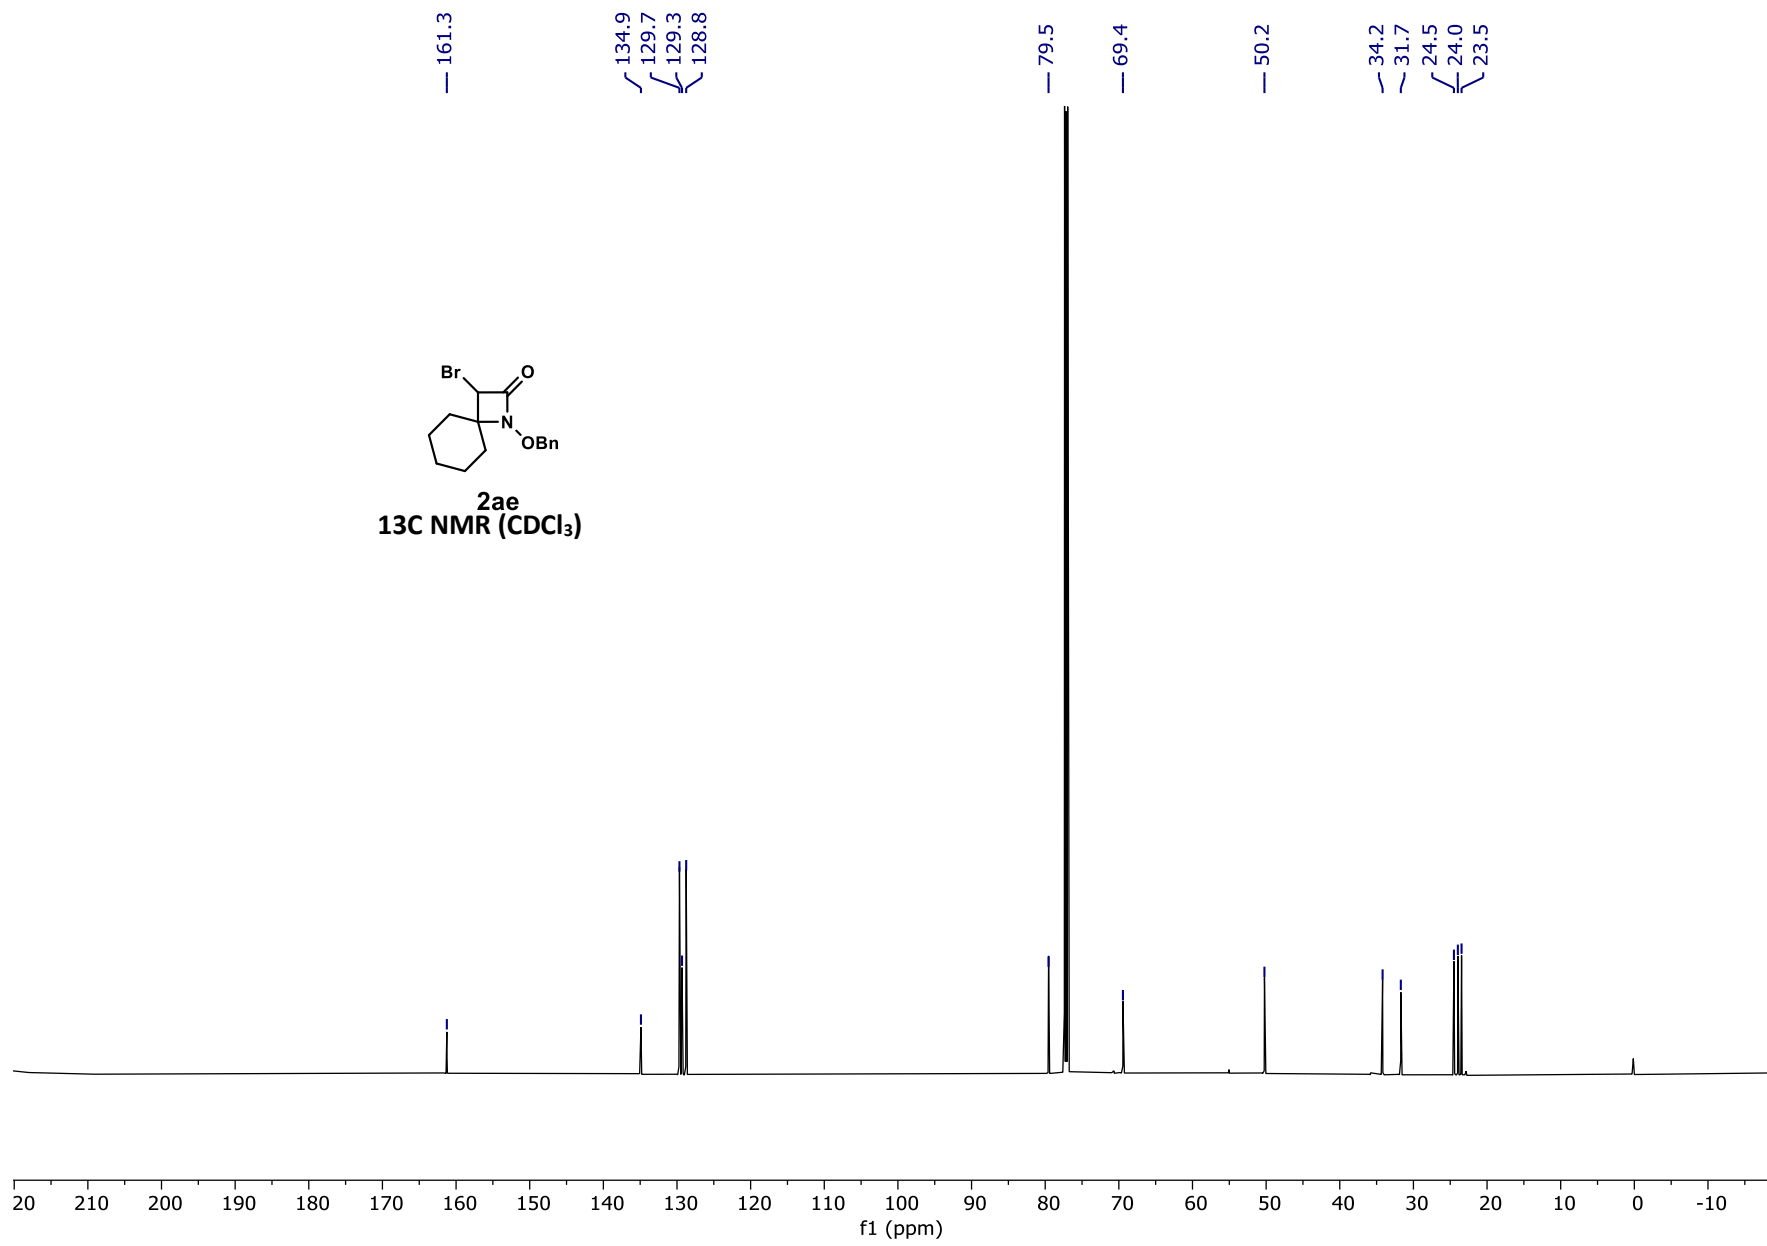

7.40  
7.39  
7.39  
7.39  
7.39  
5.04  
5.03  
5.01  
4.99  
4.45  
2.00  
1.99  
1.99  
1.99  
1.98  
1.98  
1.98  
1.97  
1.96  
1.96  
1.96  
1.95  
1.94  
1.94  
1.94  
1.93  
1.93  
1.93  
1.92  
1.92  
1.92  
1.91  
1.91  
1.91  
1.91  
1.91  
1.73  
1.73  
1.73  
1.72  
1.72  
1.72  
1.72  
1.72  
1.71  
1.71  
1.71  
1.71  
1.70  
1.70  
1.70  
1.69  
1.69  
1.62  
1.62  
1.61  
1.61  
1.61  
1.61  
1.60  
1.60  
1.60  
1.60  
1.59  
1.59  
1.59  
1.58  
1.58  
1.58  
1.58  
1.57  
1.57  
1.57  
1.55  
1.54  
1.54  
1.53  
1.52  
1.52  
1.51  
1.51

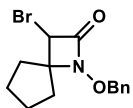

2af

1H NMR (CDCl<sub>3</sub>)

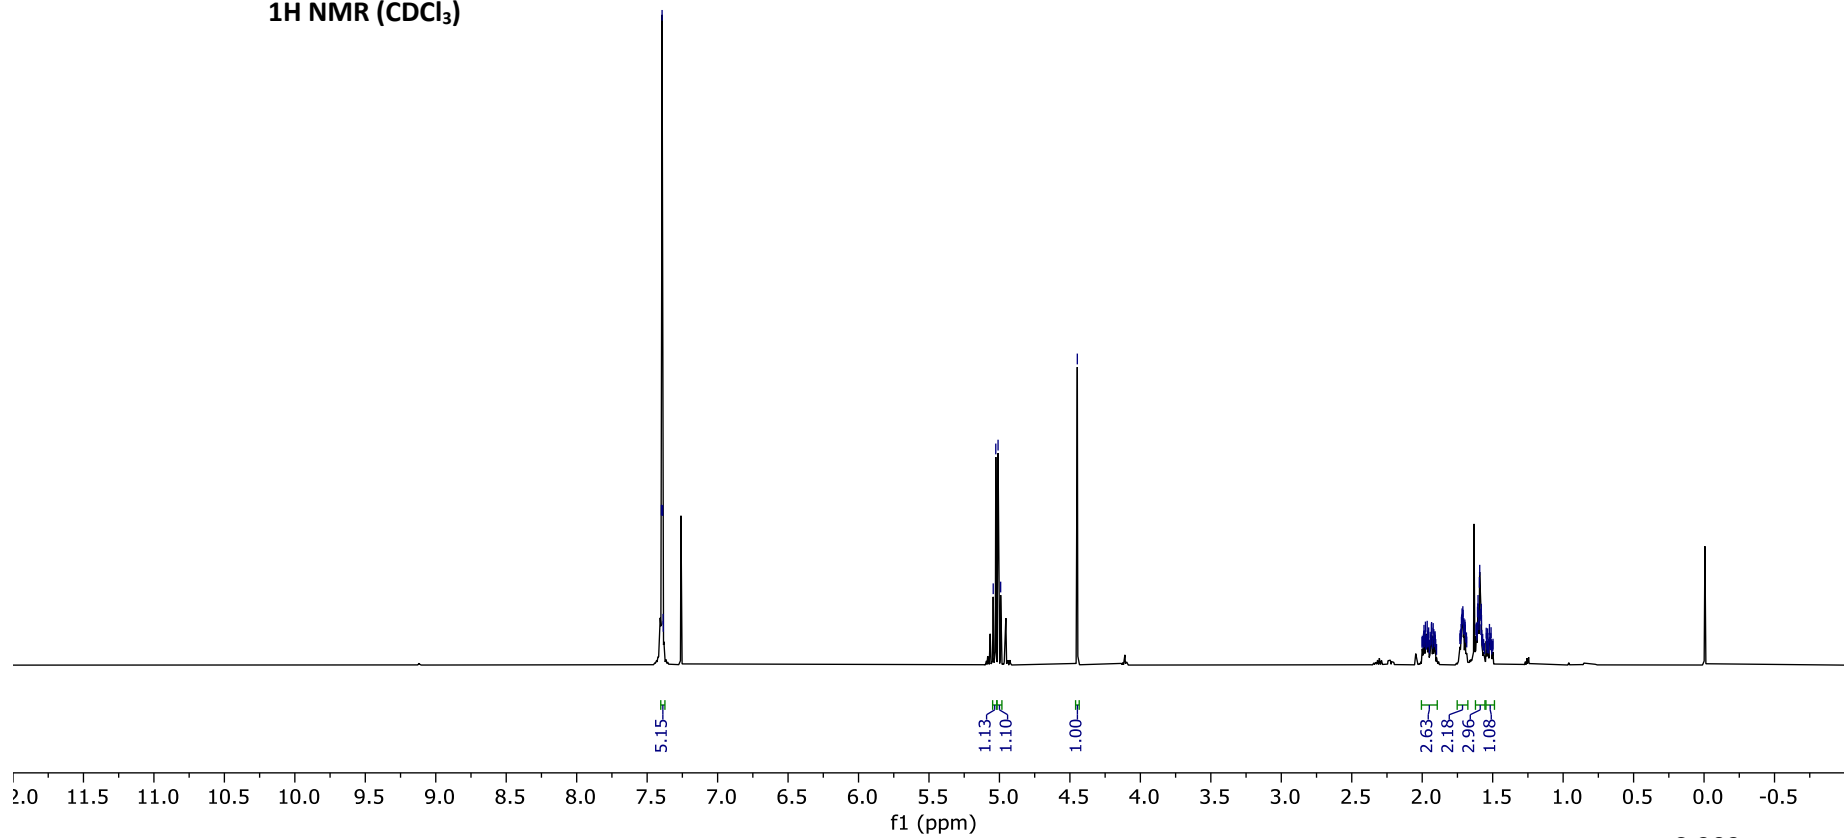

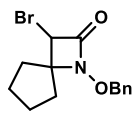

2af

<sup>13</sup>C NMR (CDCl<sub>3</sub>)

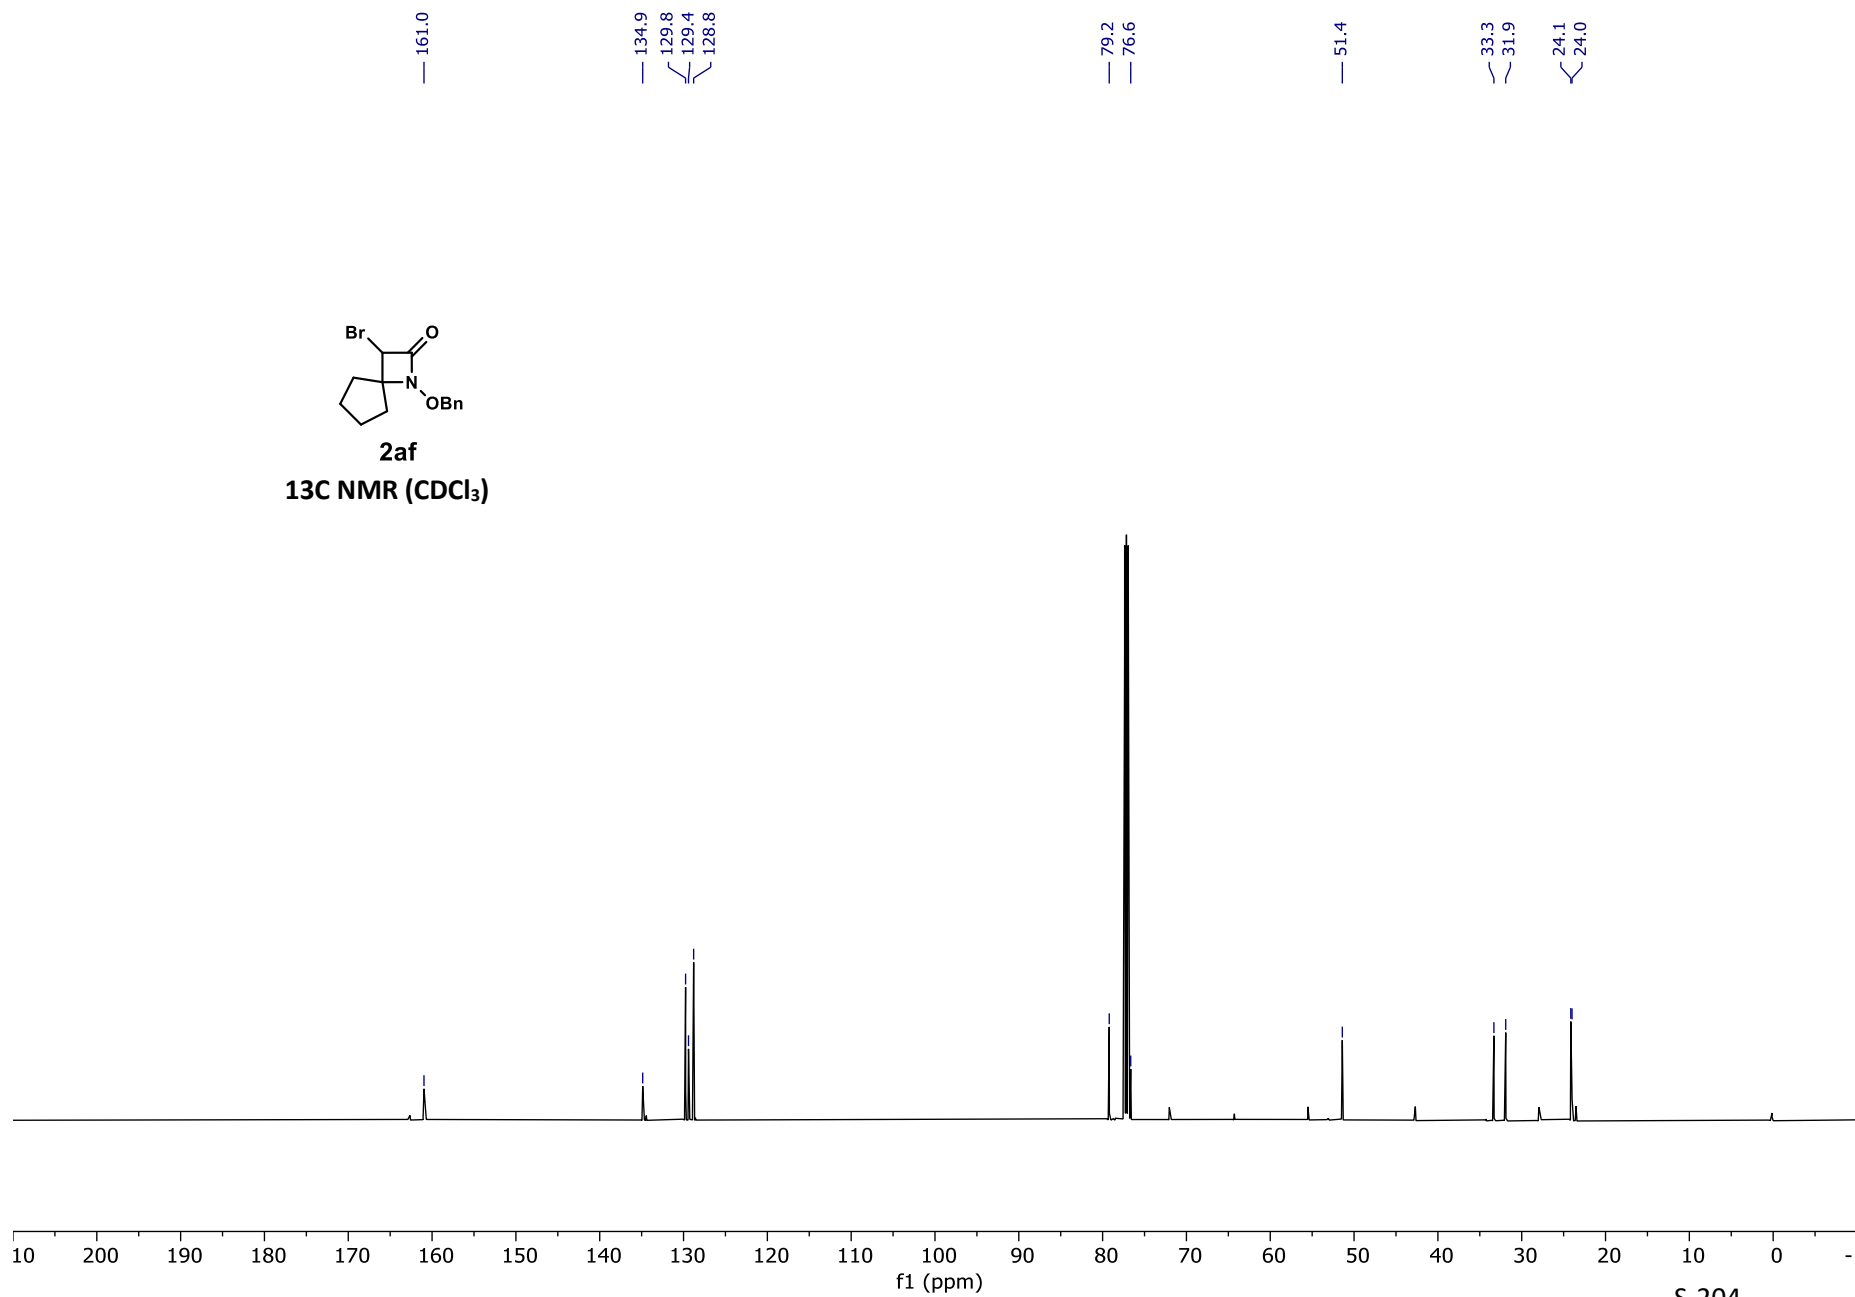



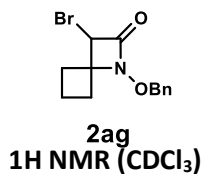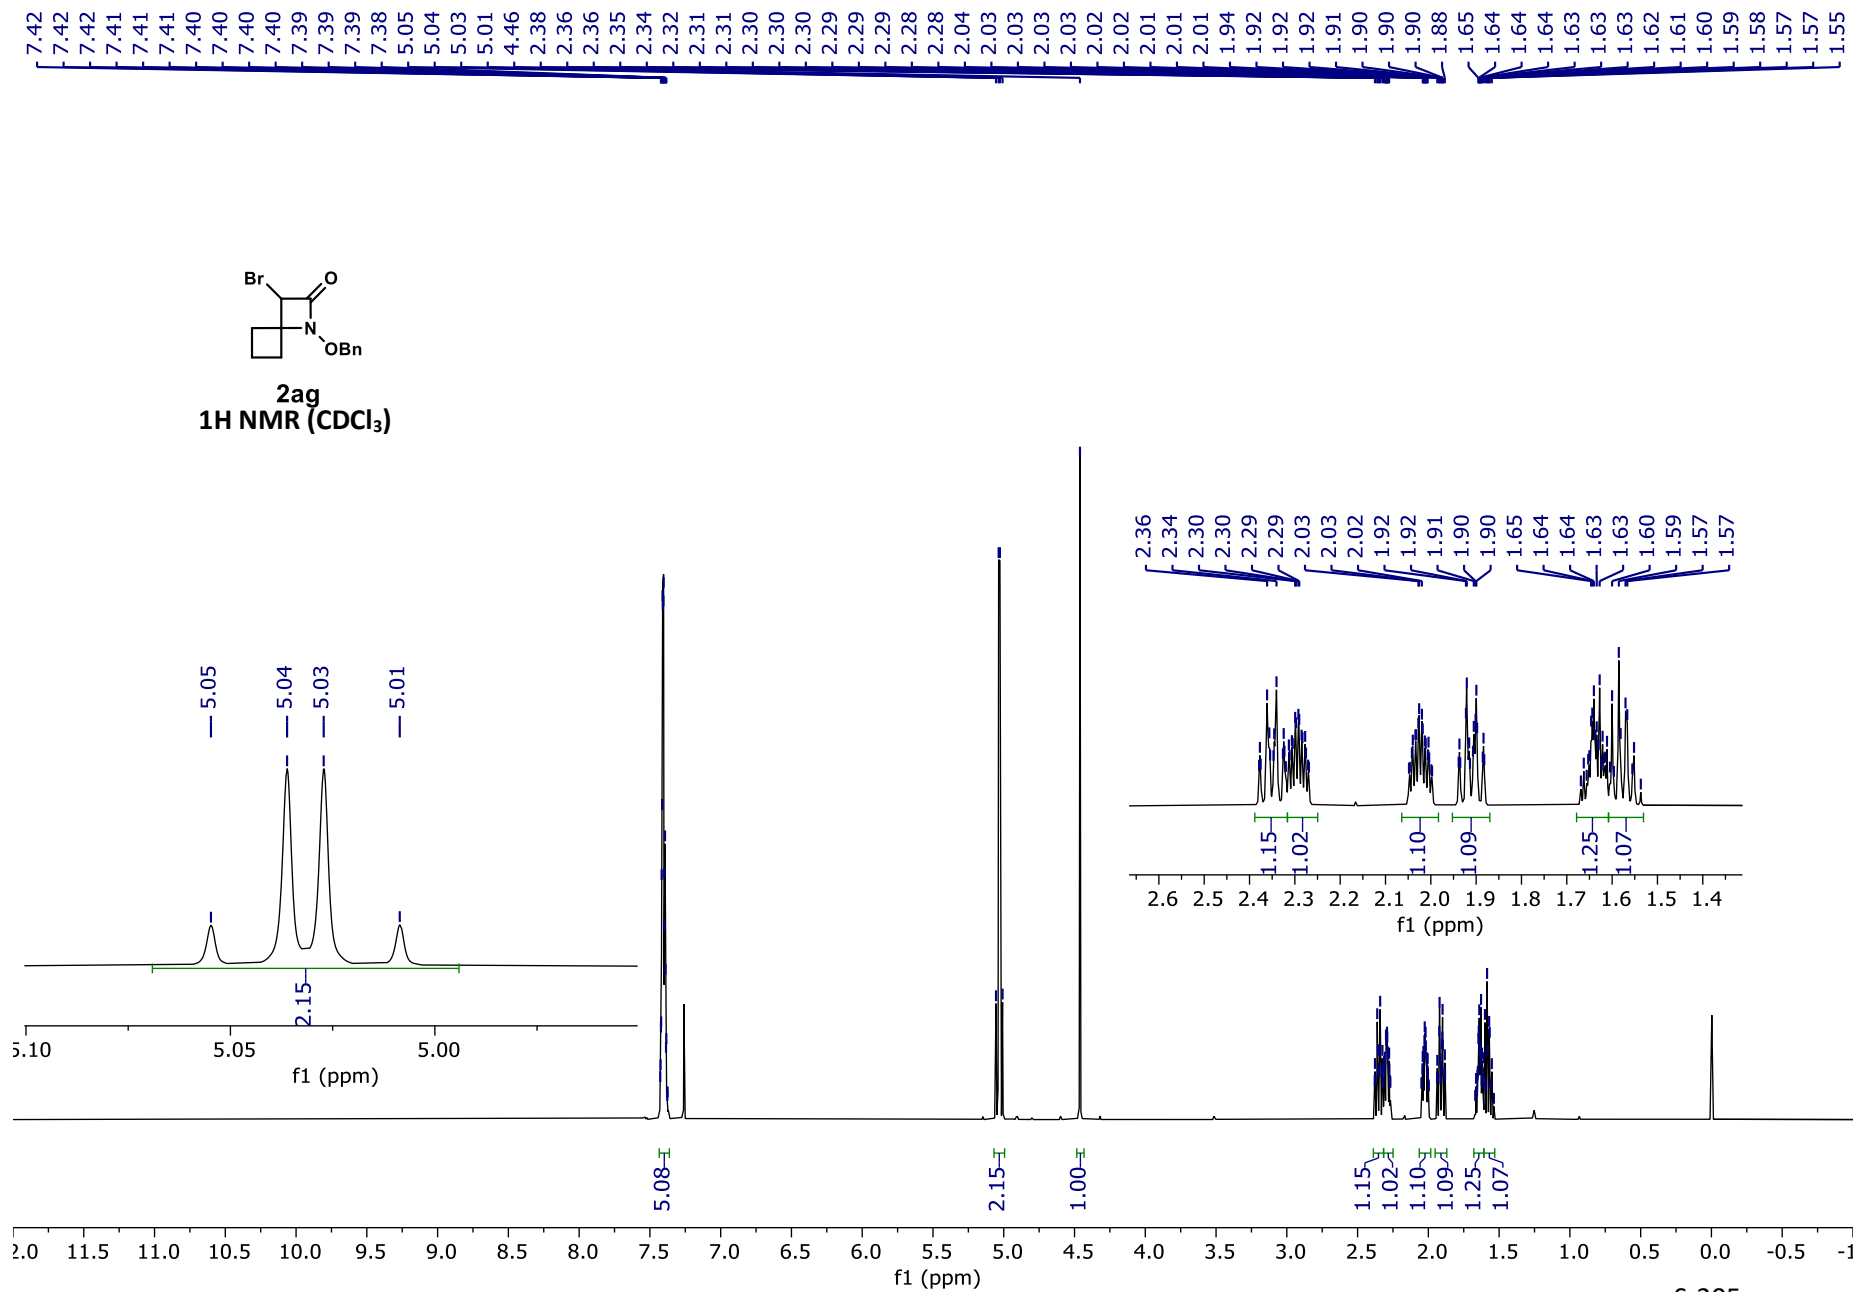

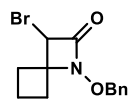

**2ag**  
**<sup>13</sup>C NMR (CDCl<sub>3</sub>)**

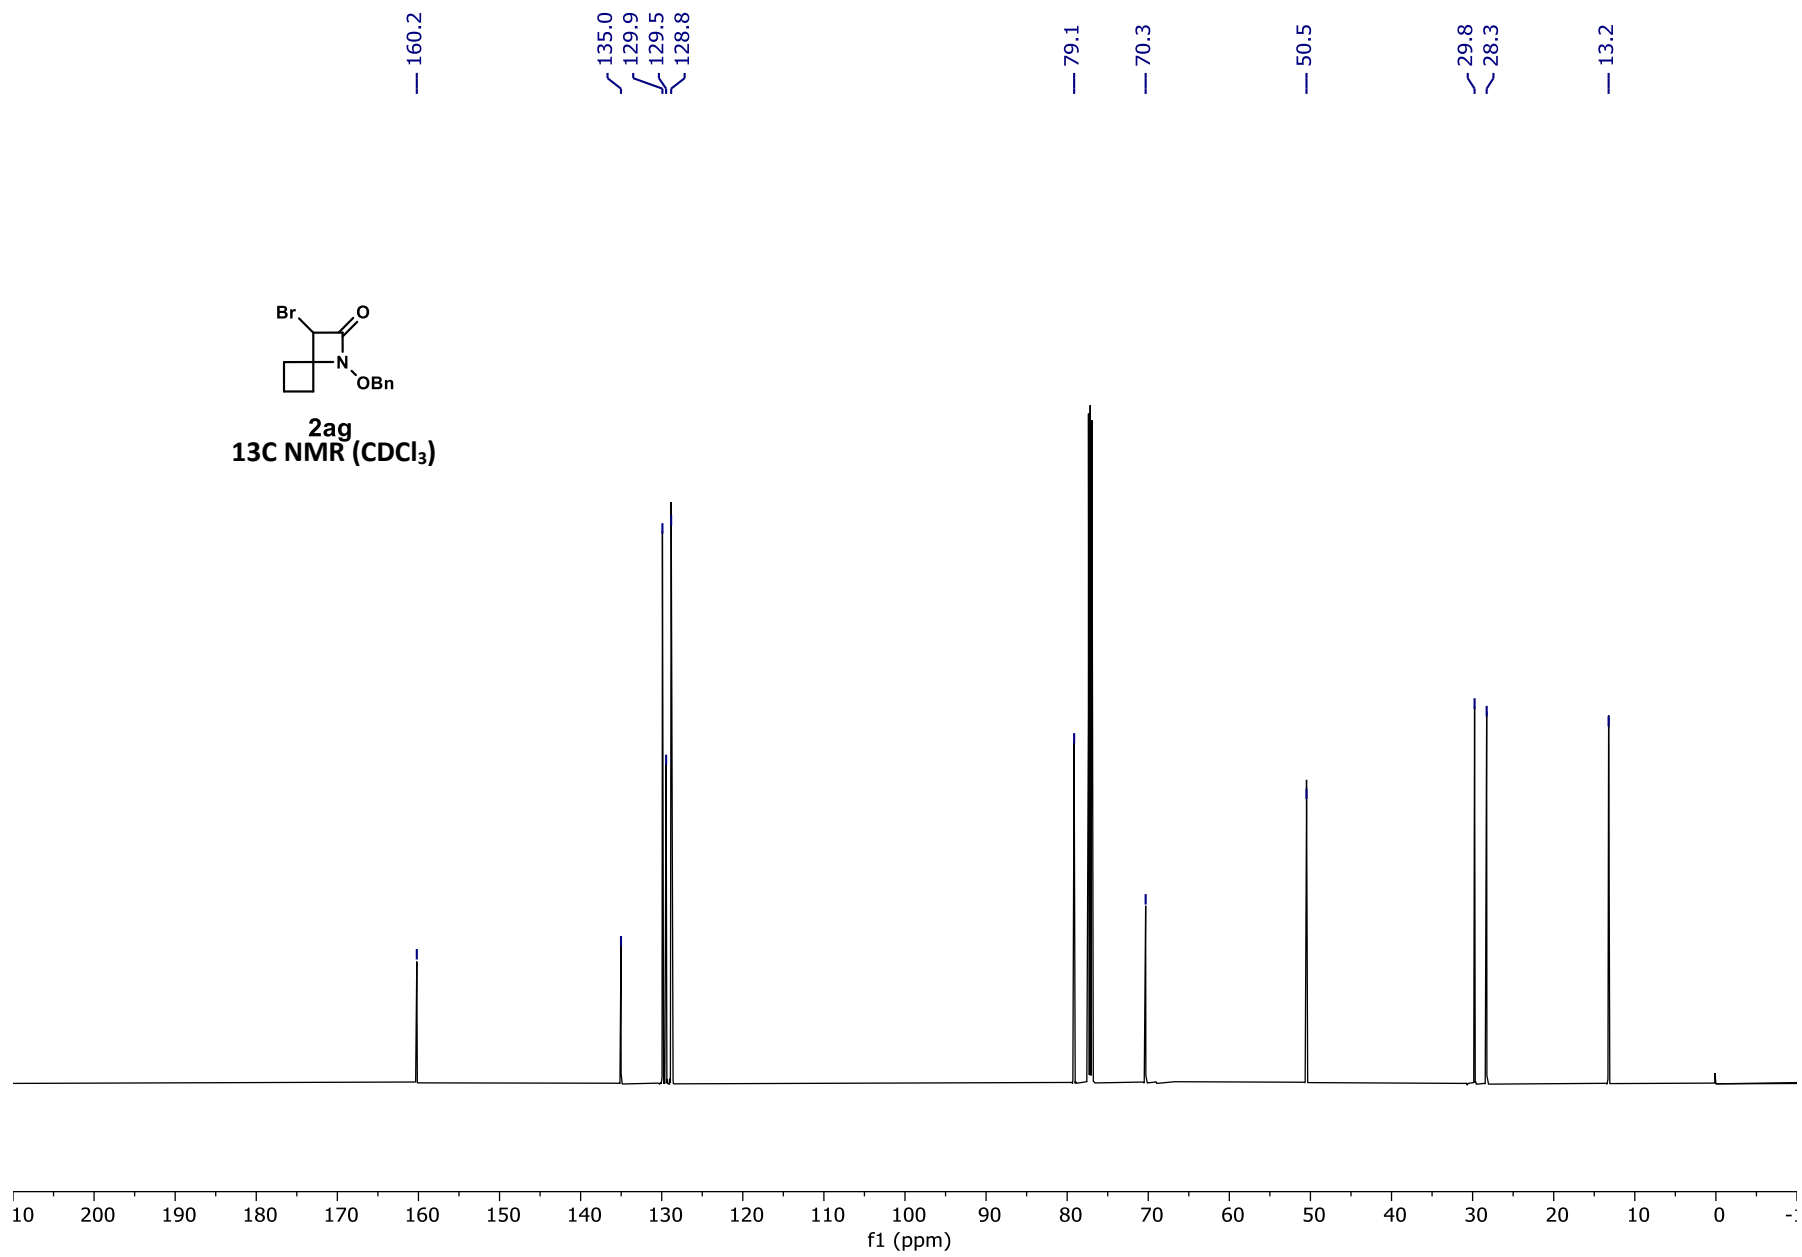

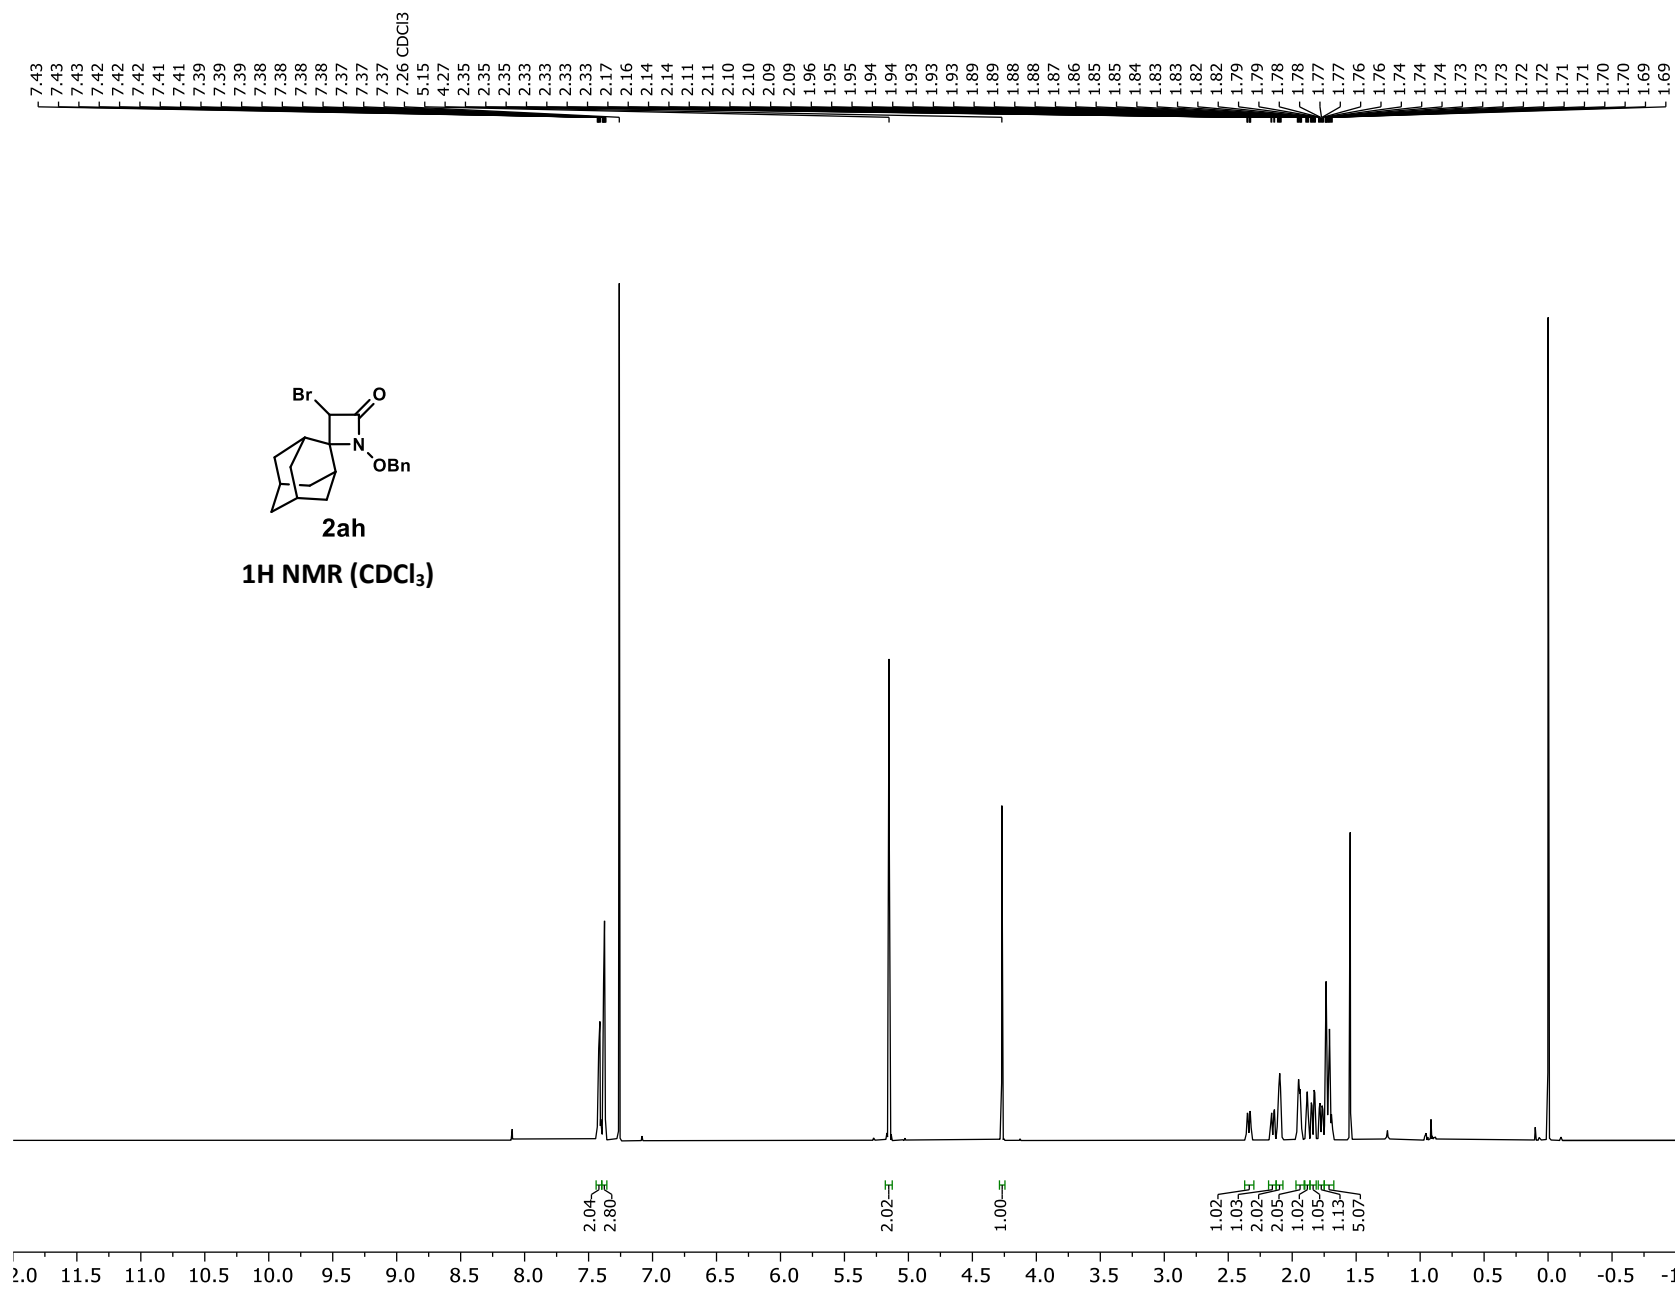

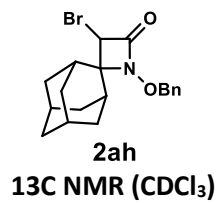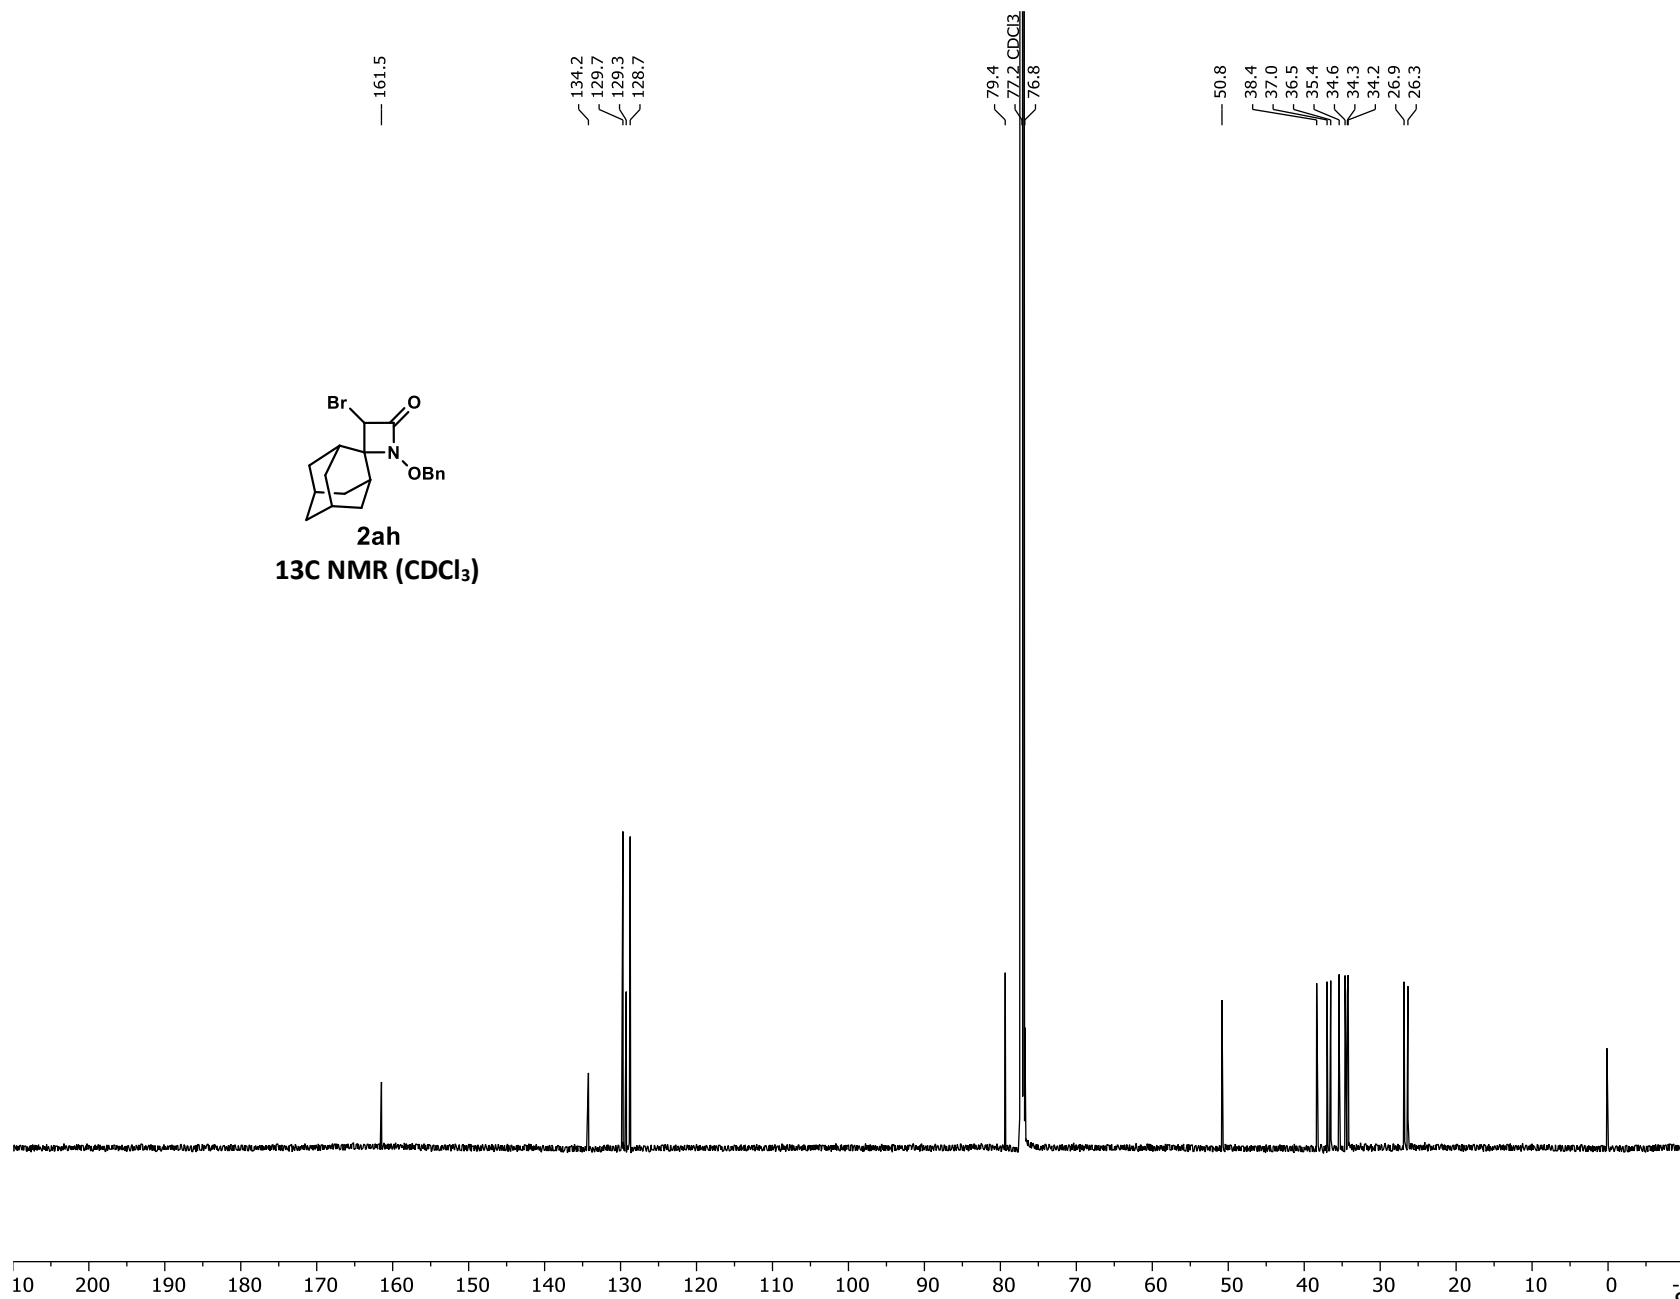

7.38  
5.03  
5.01  
4.99  
4.97  
4.36  
3.92  
3.92  
3.91  
3.91  
3.91  
3.90  
3.90  
3.90  
3.89  
3.89  
3.83  
3.82  
3.82  
3.82  
3.82  
3.81  
3.81  
3.80  
3.80  
3.80  
3.80  
3.79  
3.79  
3.55  
3.54  
3.53  
3.53  
3.52  
3.51  
3.51  
3.46  
3.45  
3.44  
3.44  
3.44  
3.43  
3.42  
3.42  
2.10  
2.09  
2.08  
2.08  
2.08  
2.07  
2.06  
2.05  
1.76  
1.76  
1.75  
1.75  
1.75  
1.74  
1.73  
1.73  
1.73  
1.73  
1.72  
1.70  
1.69  
1.68  
1.68  
1.67  
1.67  
1.66  
1.65  
1.54  
1.54  
1.54  
1.53  
1.53  
1.52  
1.52  
1.51  
1.51

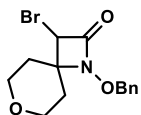

**2ai**

**<sup>1</sup>H NMR (CDCl<sub>3</sub>)**

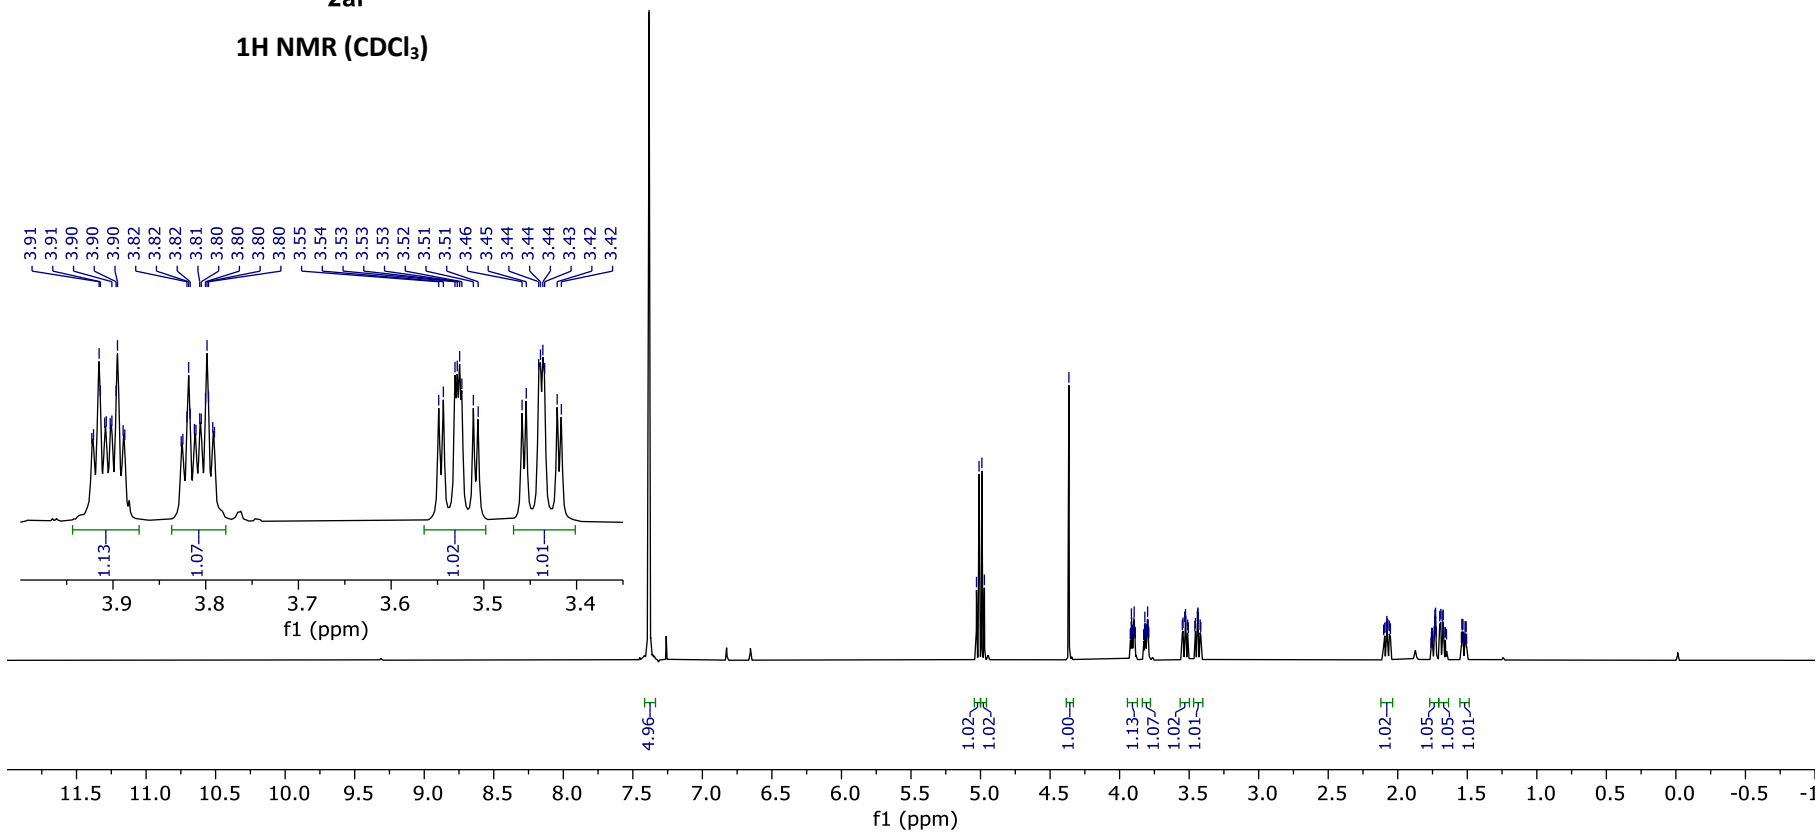

O=C1N(Oc2ccccc2)C(Br)C12CCOCC2  
**2ai**  
**<sup>13</sup>C NMR (CDCl<sub>3</sub>)**

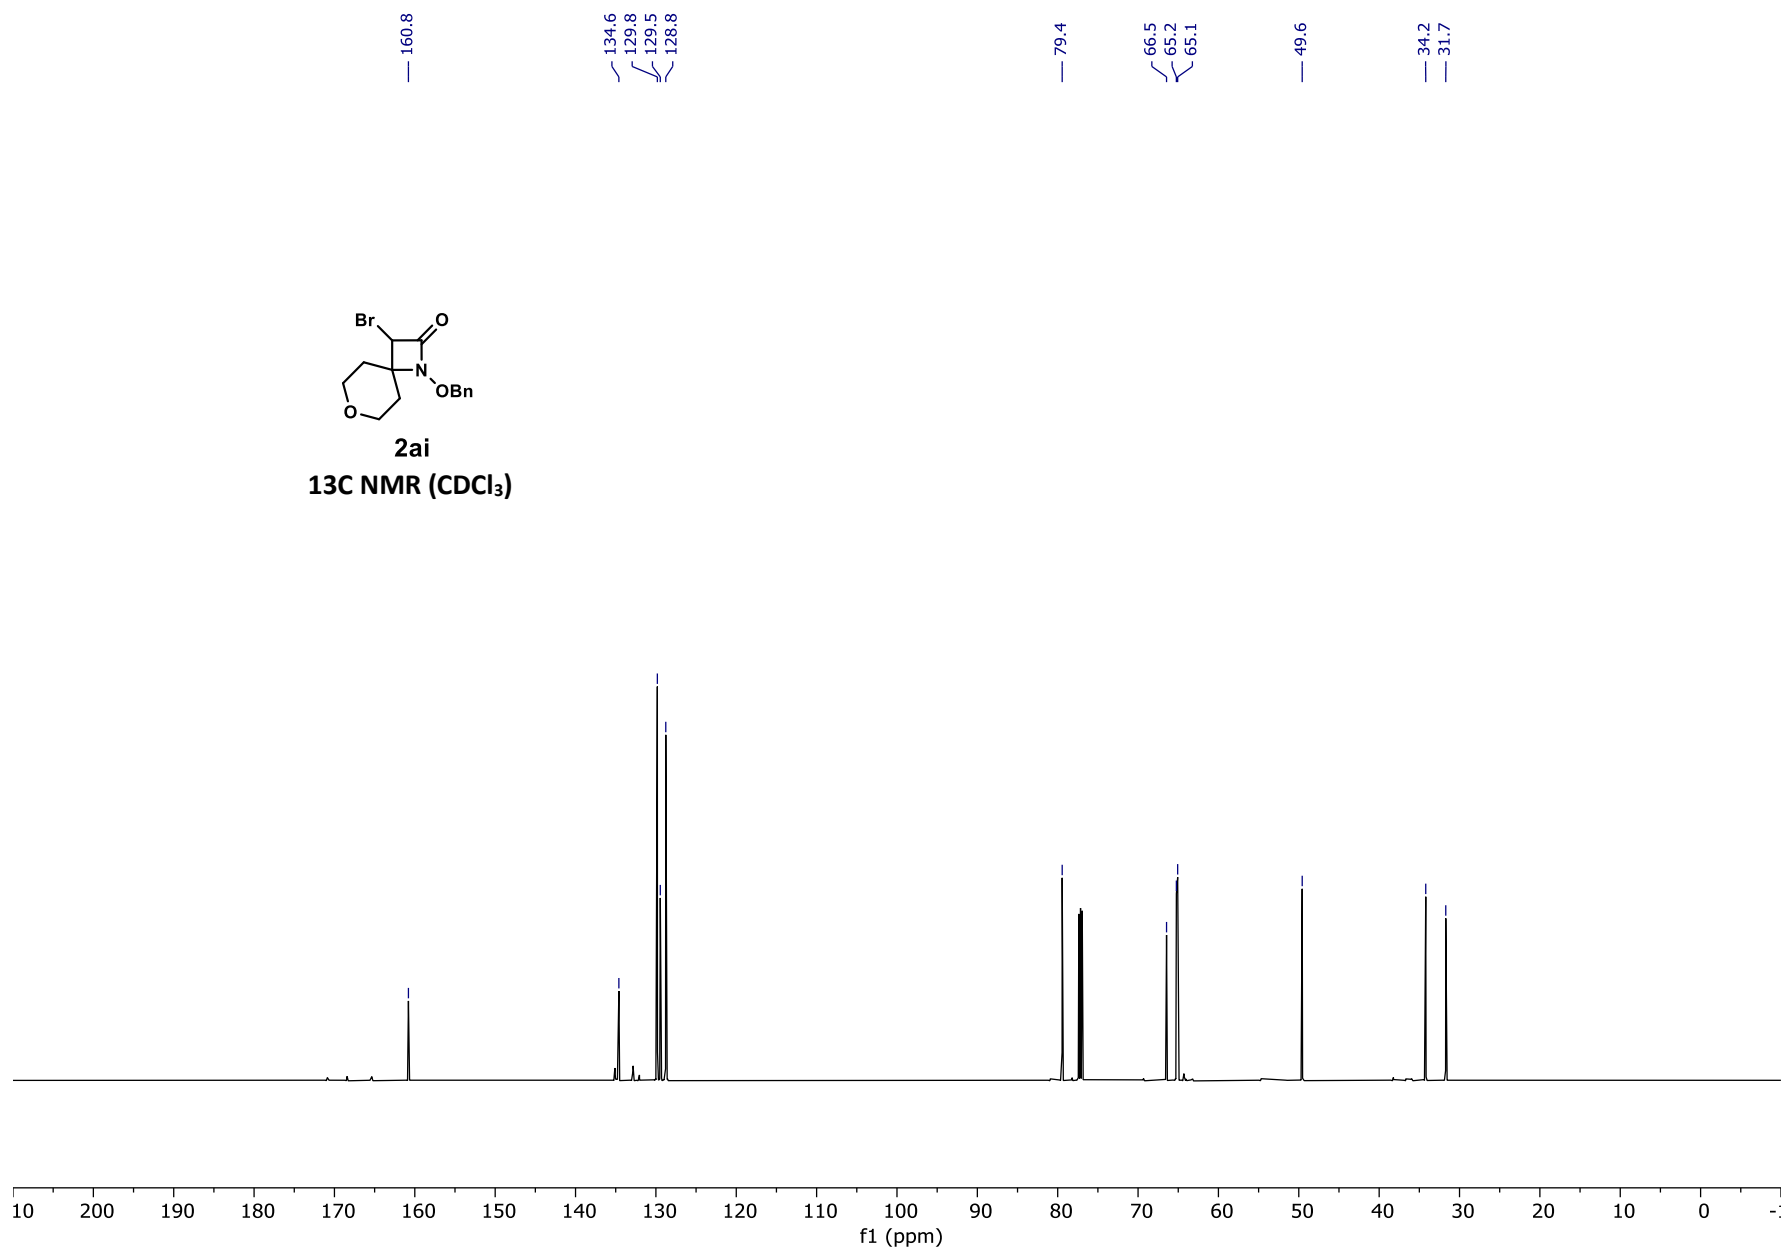

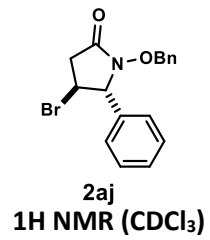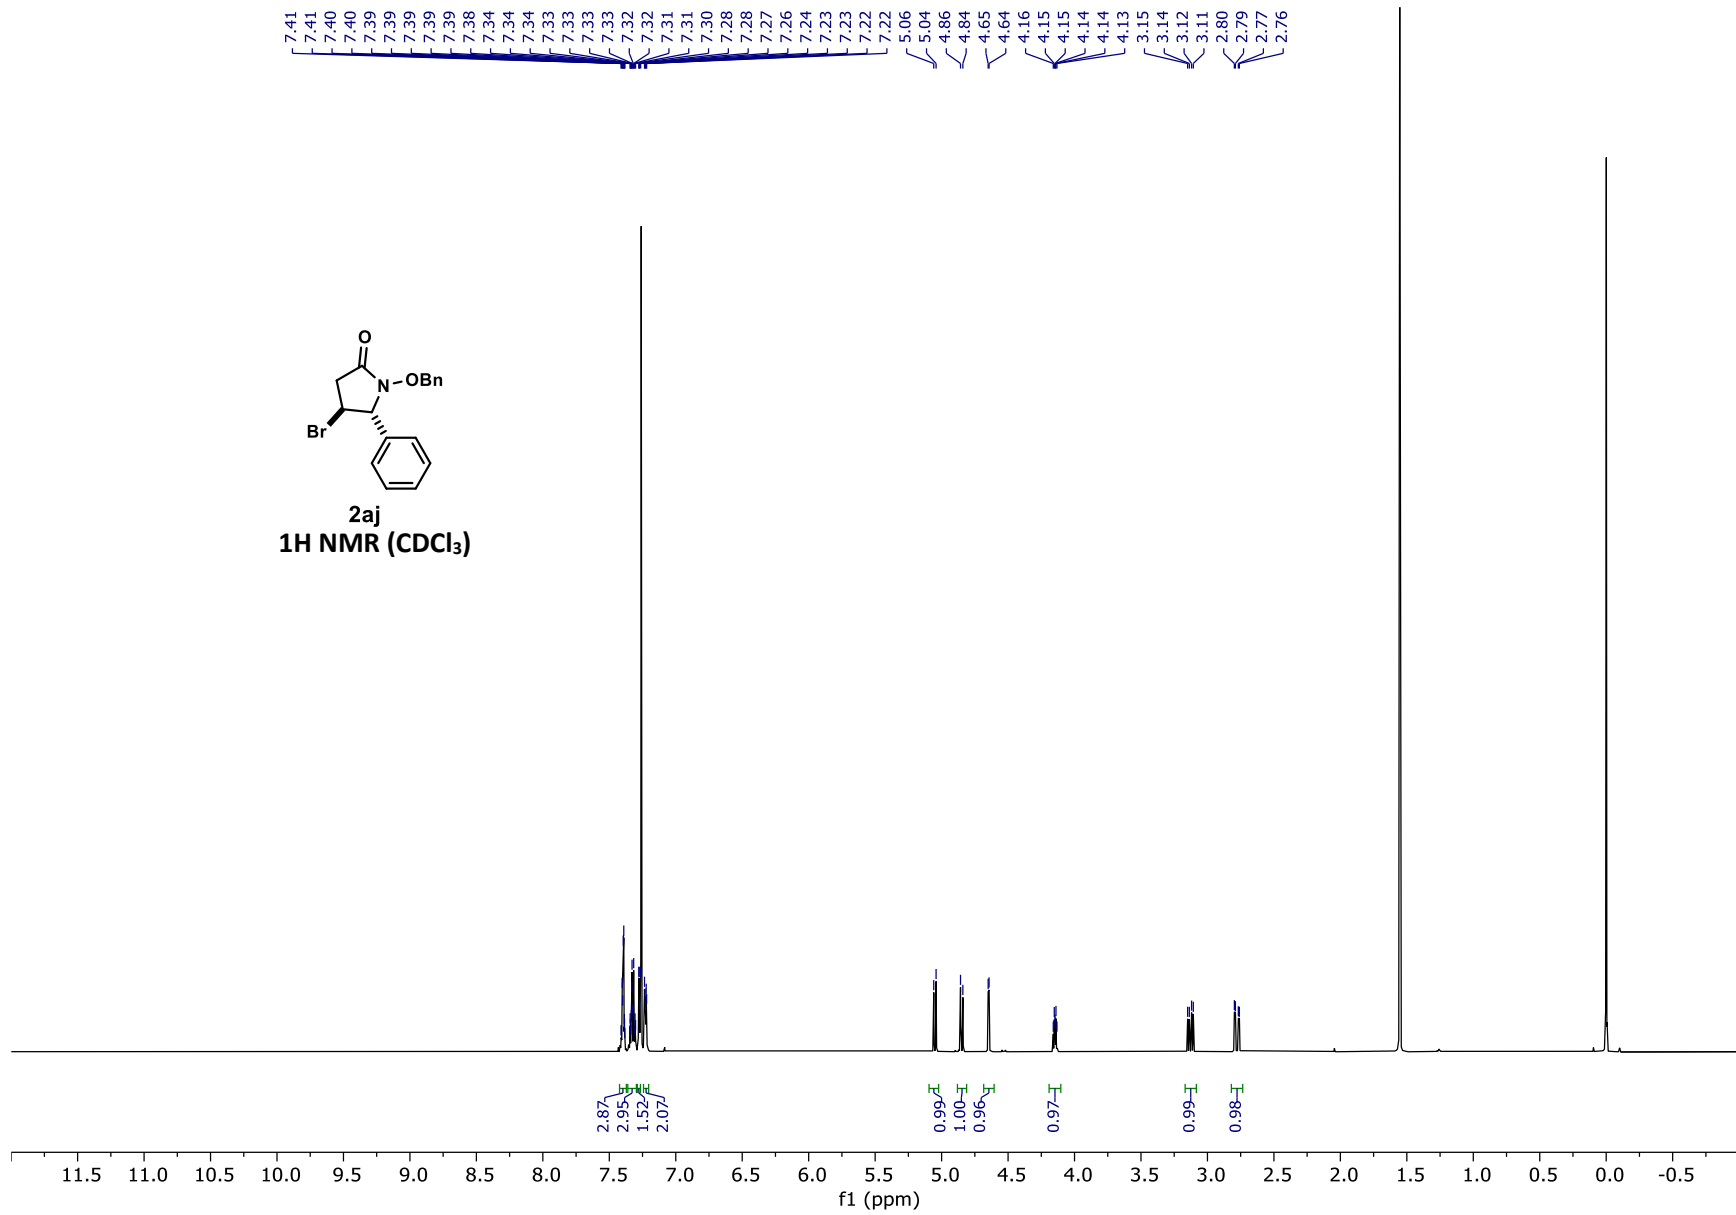

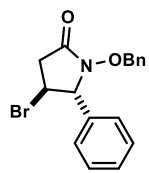

2aj

**<sup>13</sup>C NMR (CDCl<sub>3</sub>)**

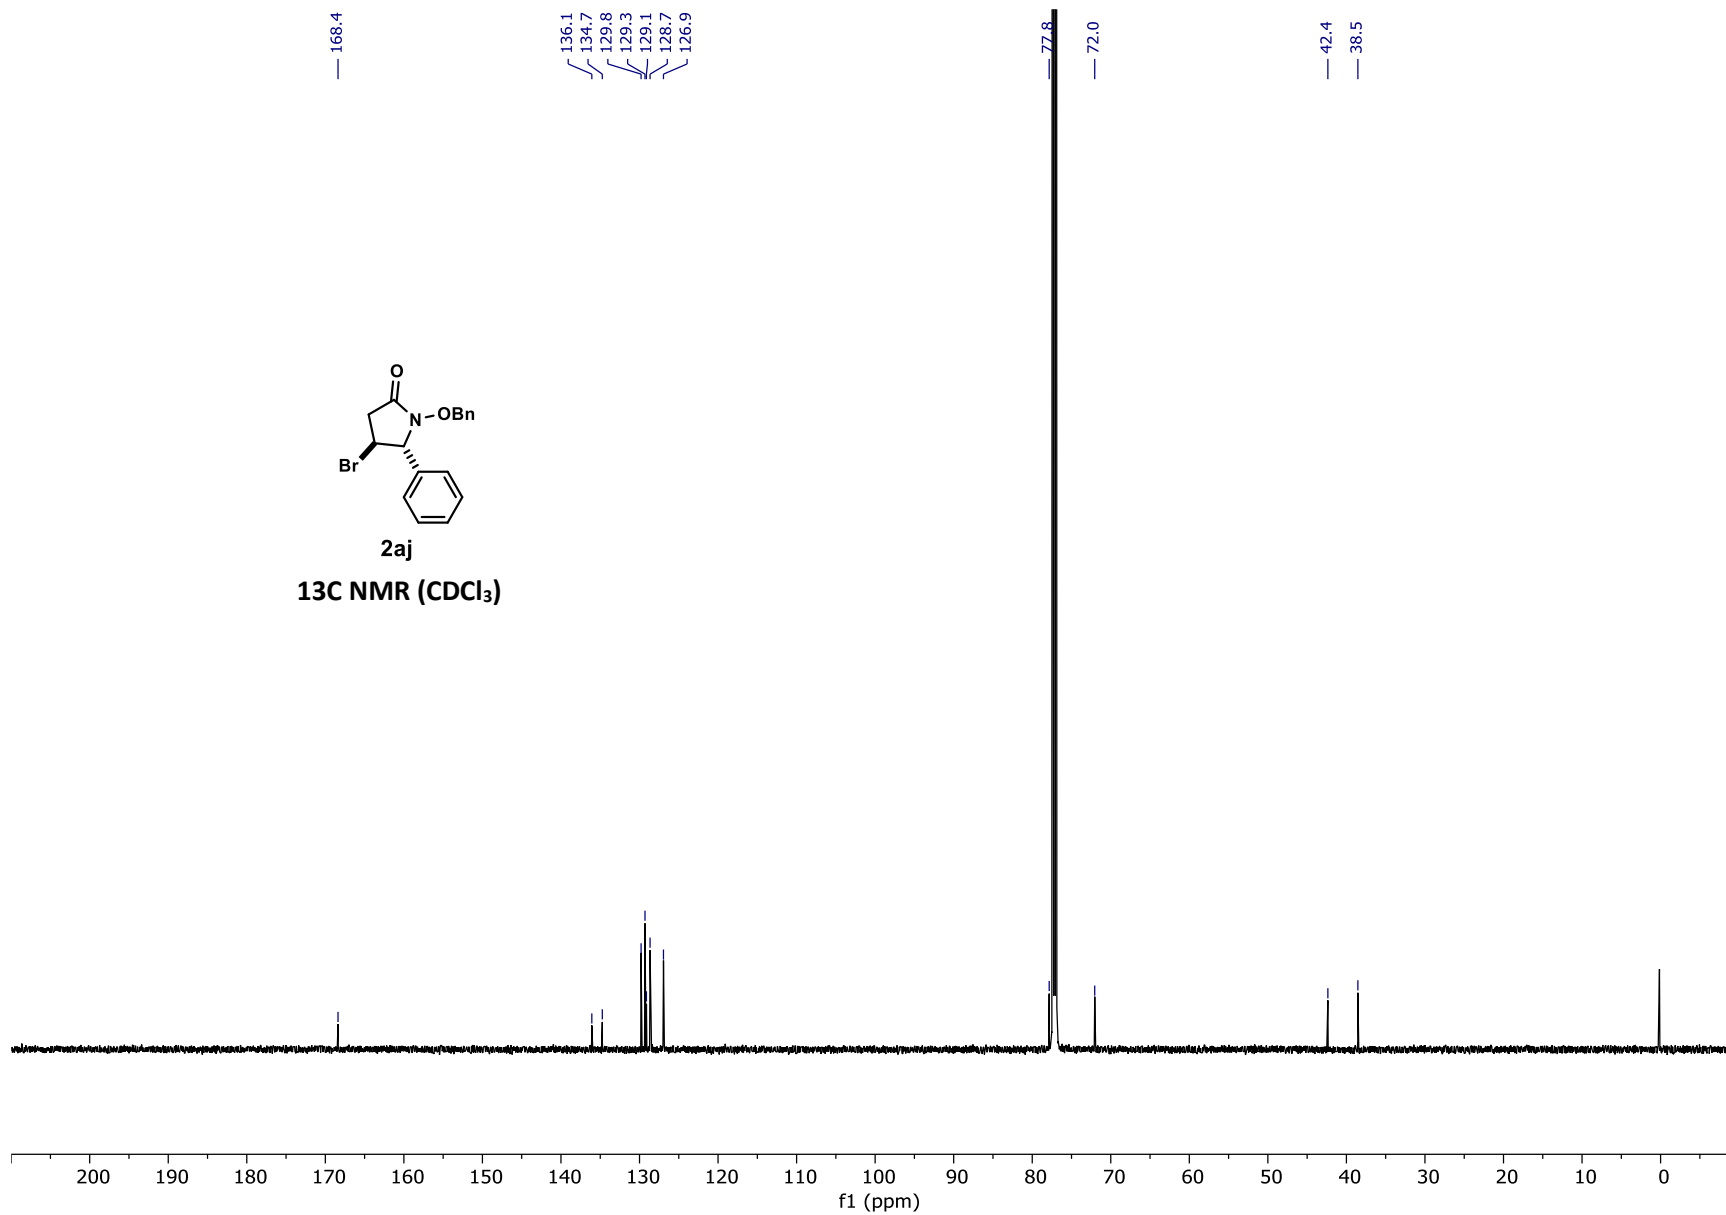



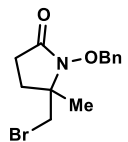

2ak

<sup>1</sup>H NMR (CDCl<sub>3</sub>)

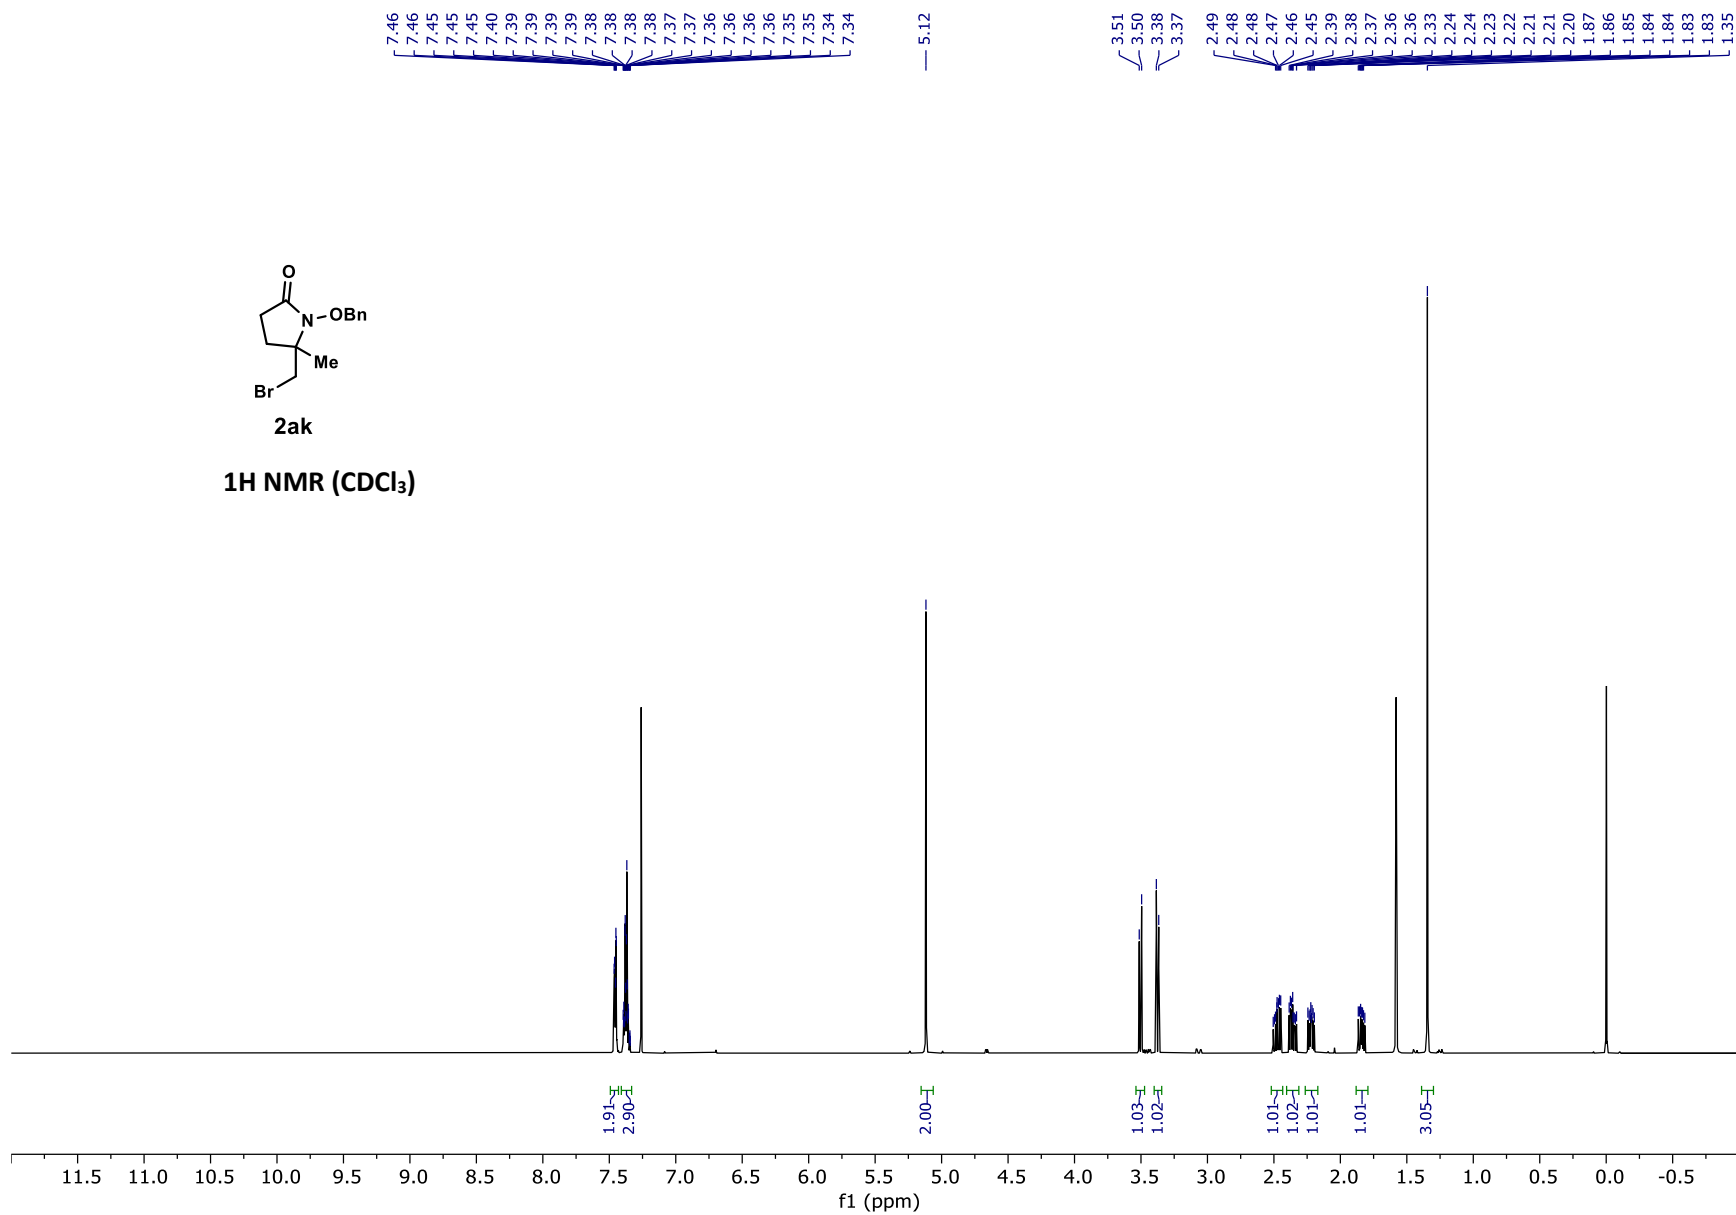

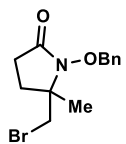

2ak

**<sup>13</sup>C NMR (CDCl<sub>3</sub>)**

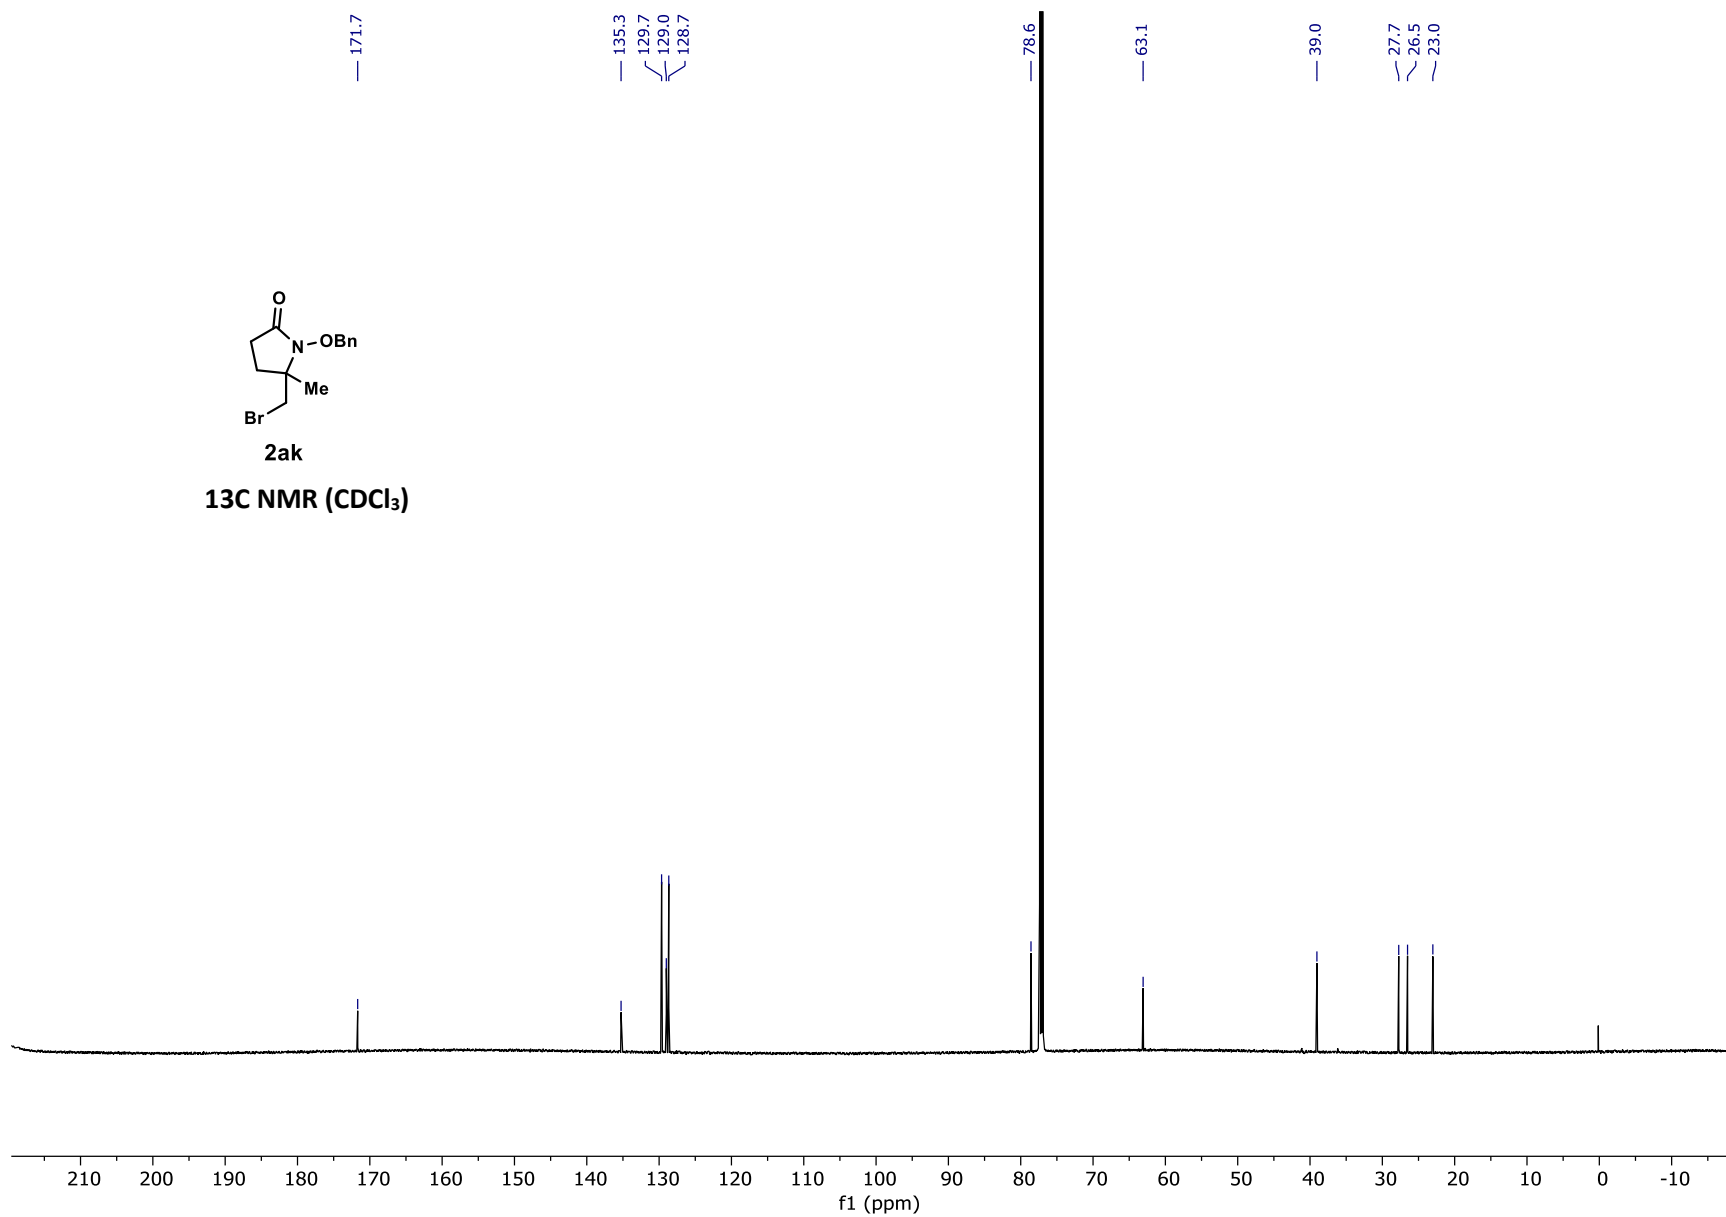

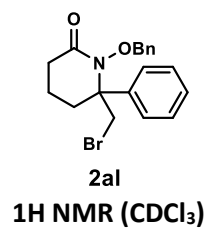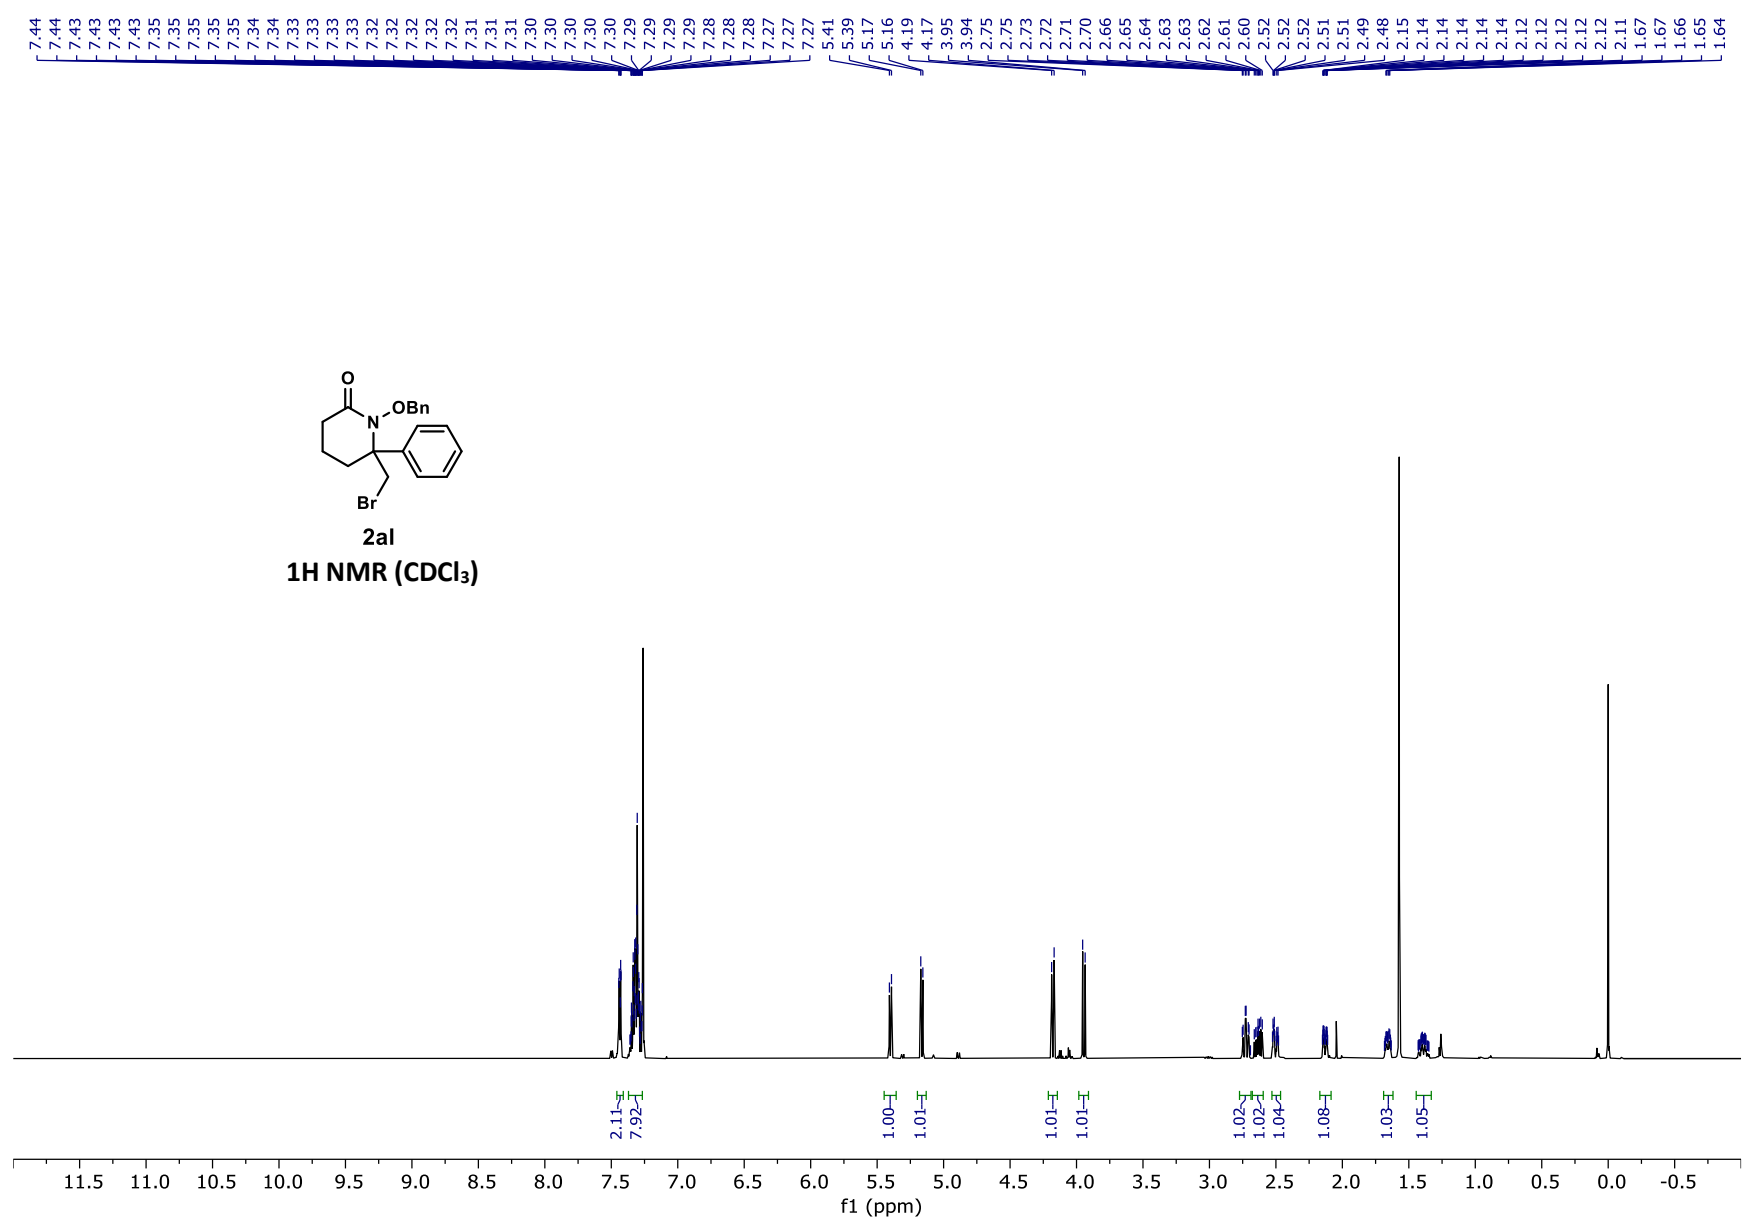

— 171.5

— 141.0

— 135.7

— 129.4

— 129.0

— 128.5

— 128.1

— 126.8

— 77.7

— 72.3

— 38.8

— 36.1

— 33.7

— 17.0

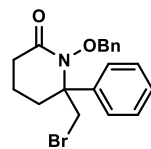

2aI

**<sup>13</sup>C NMR (CDCl<sub>3</sub>)**

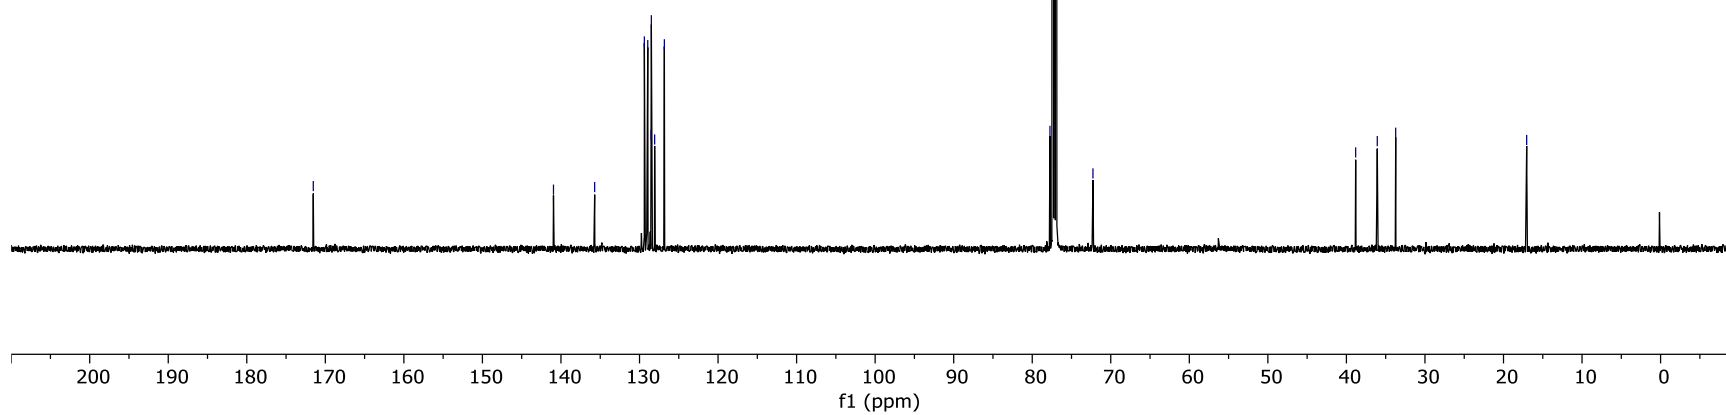

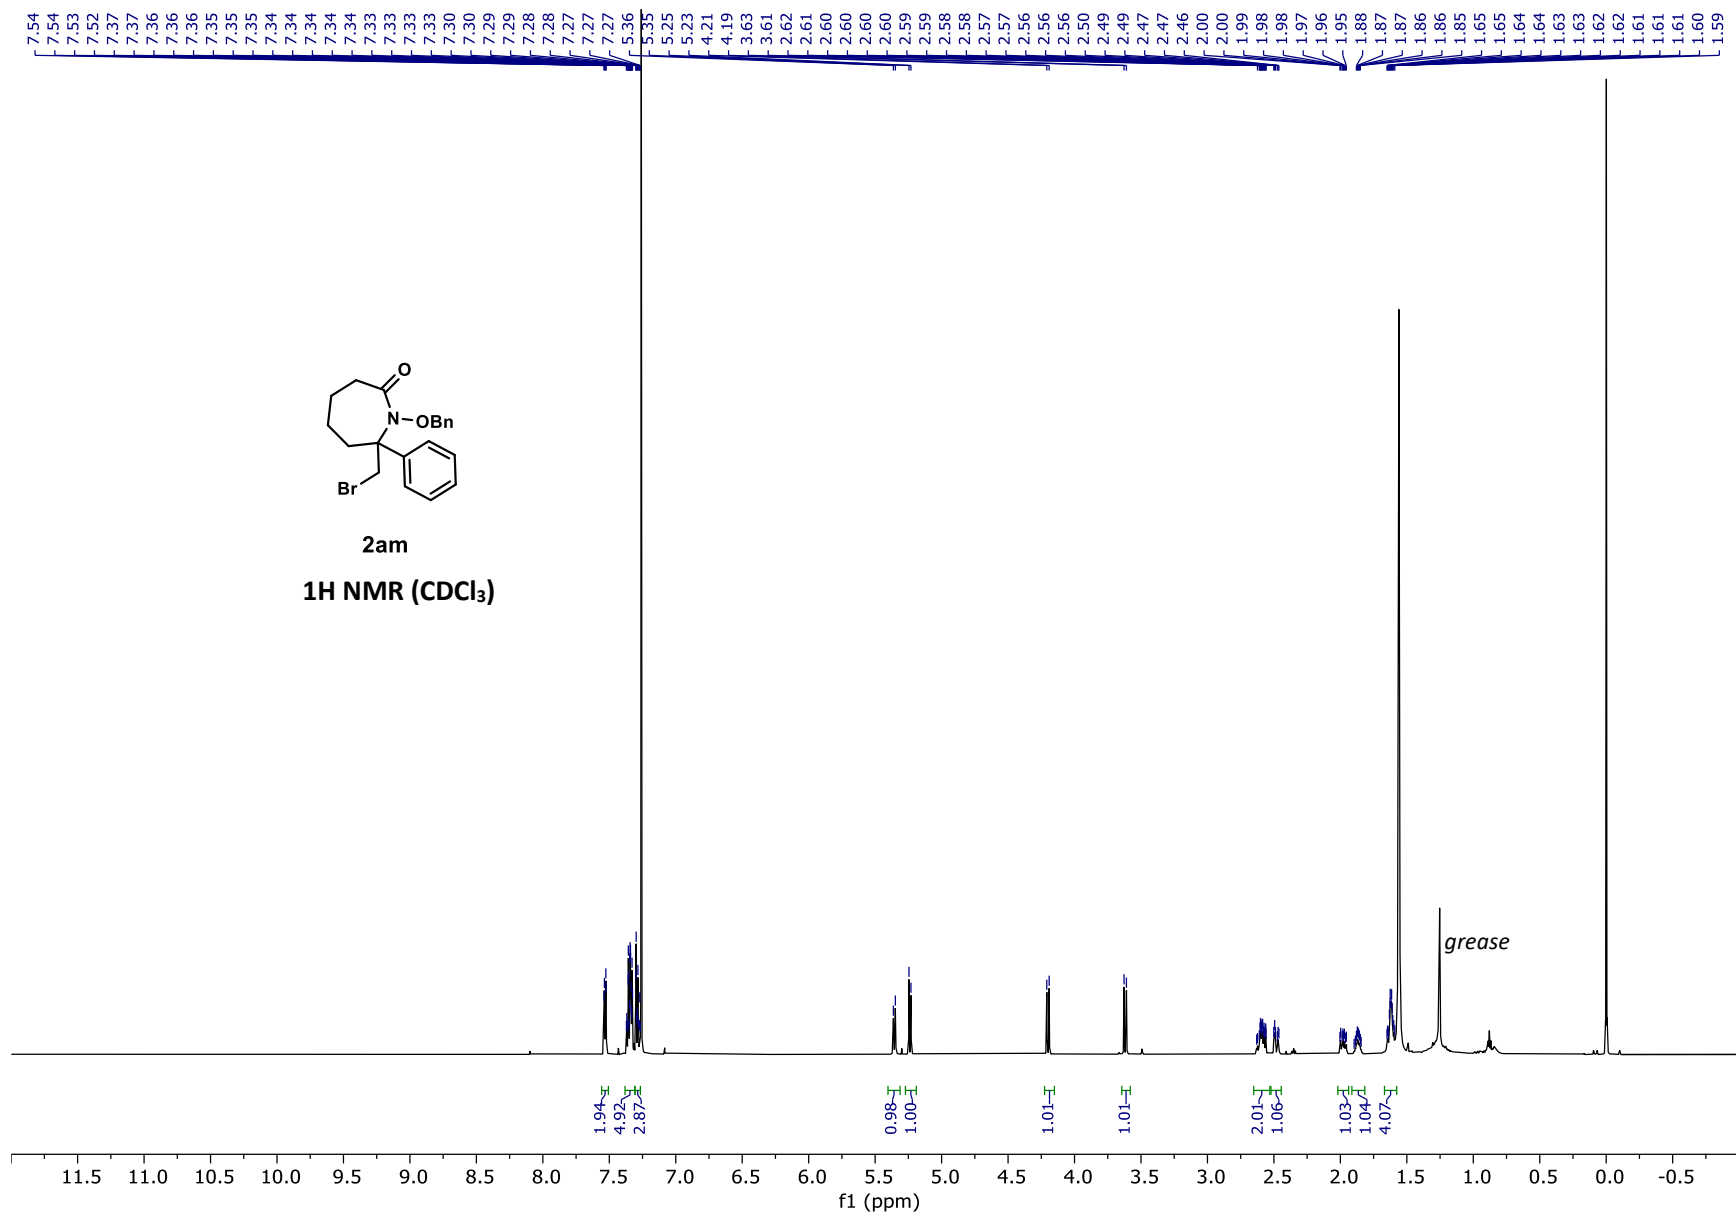

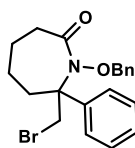

2am  
13C NMR (CDCl<sub>3</sub>)

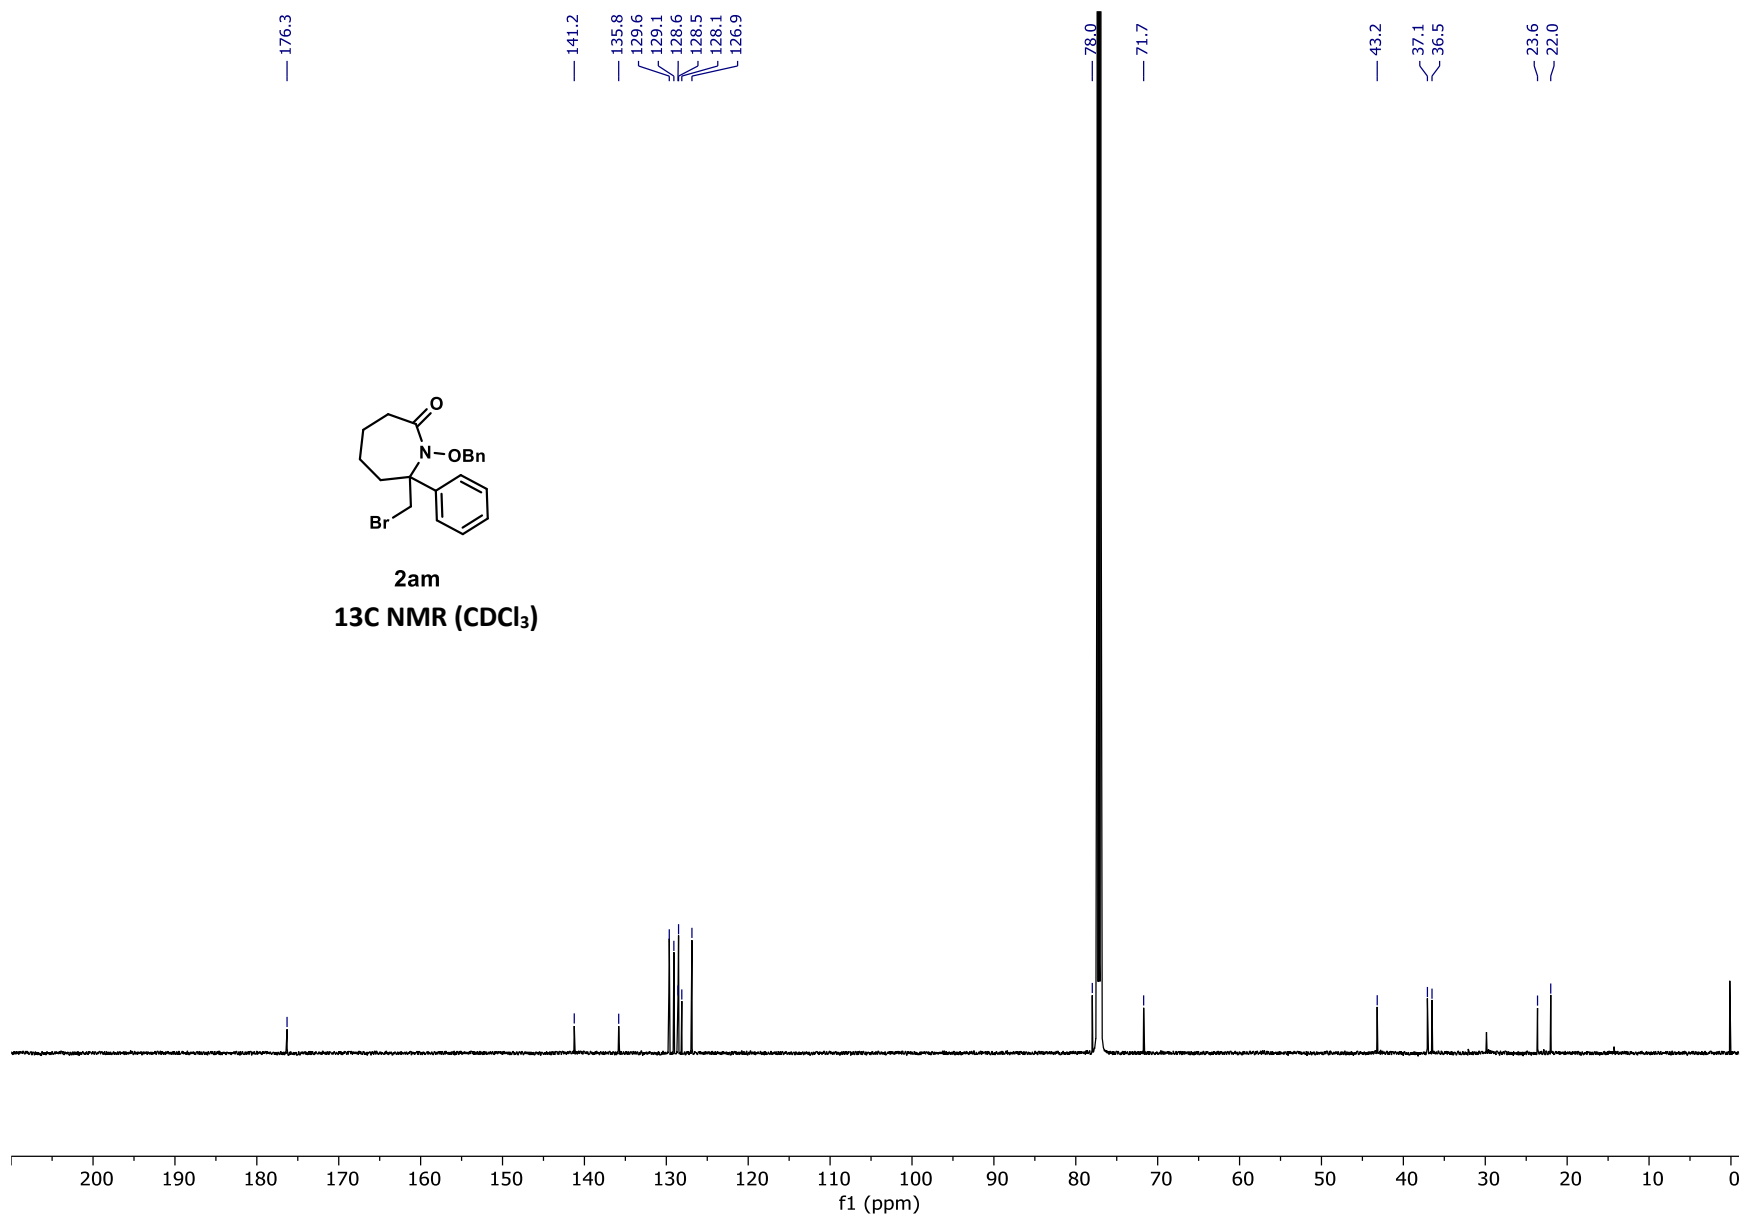

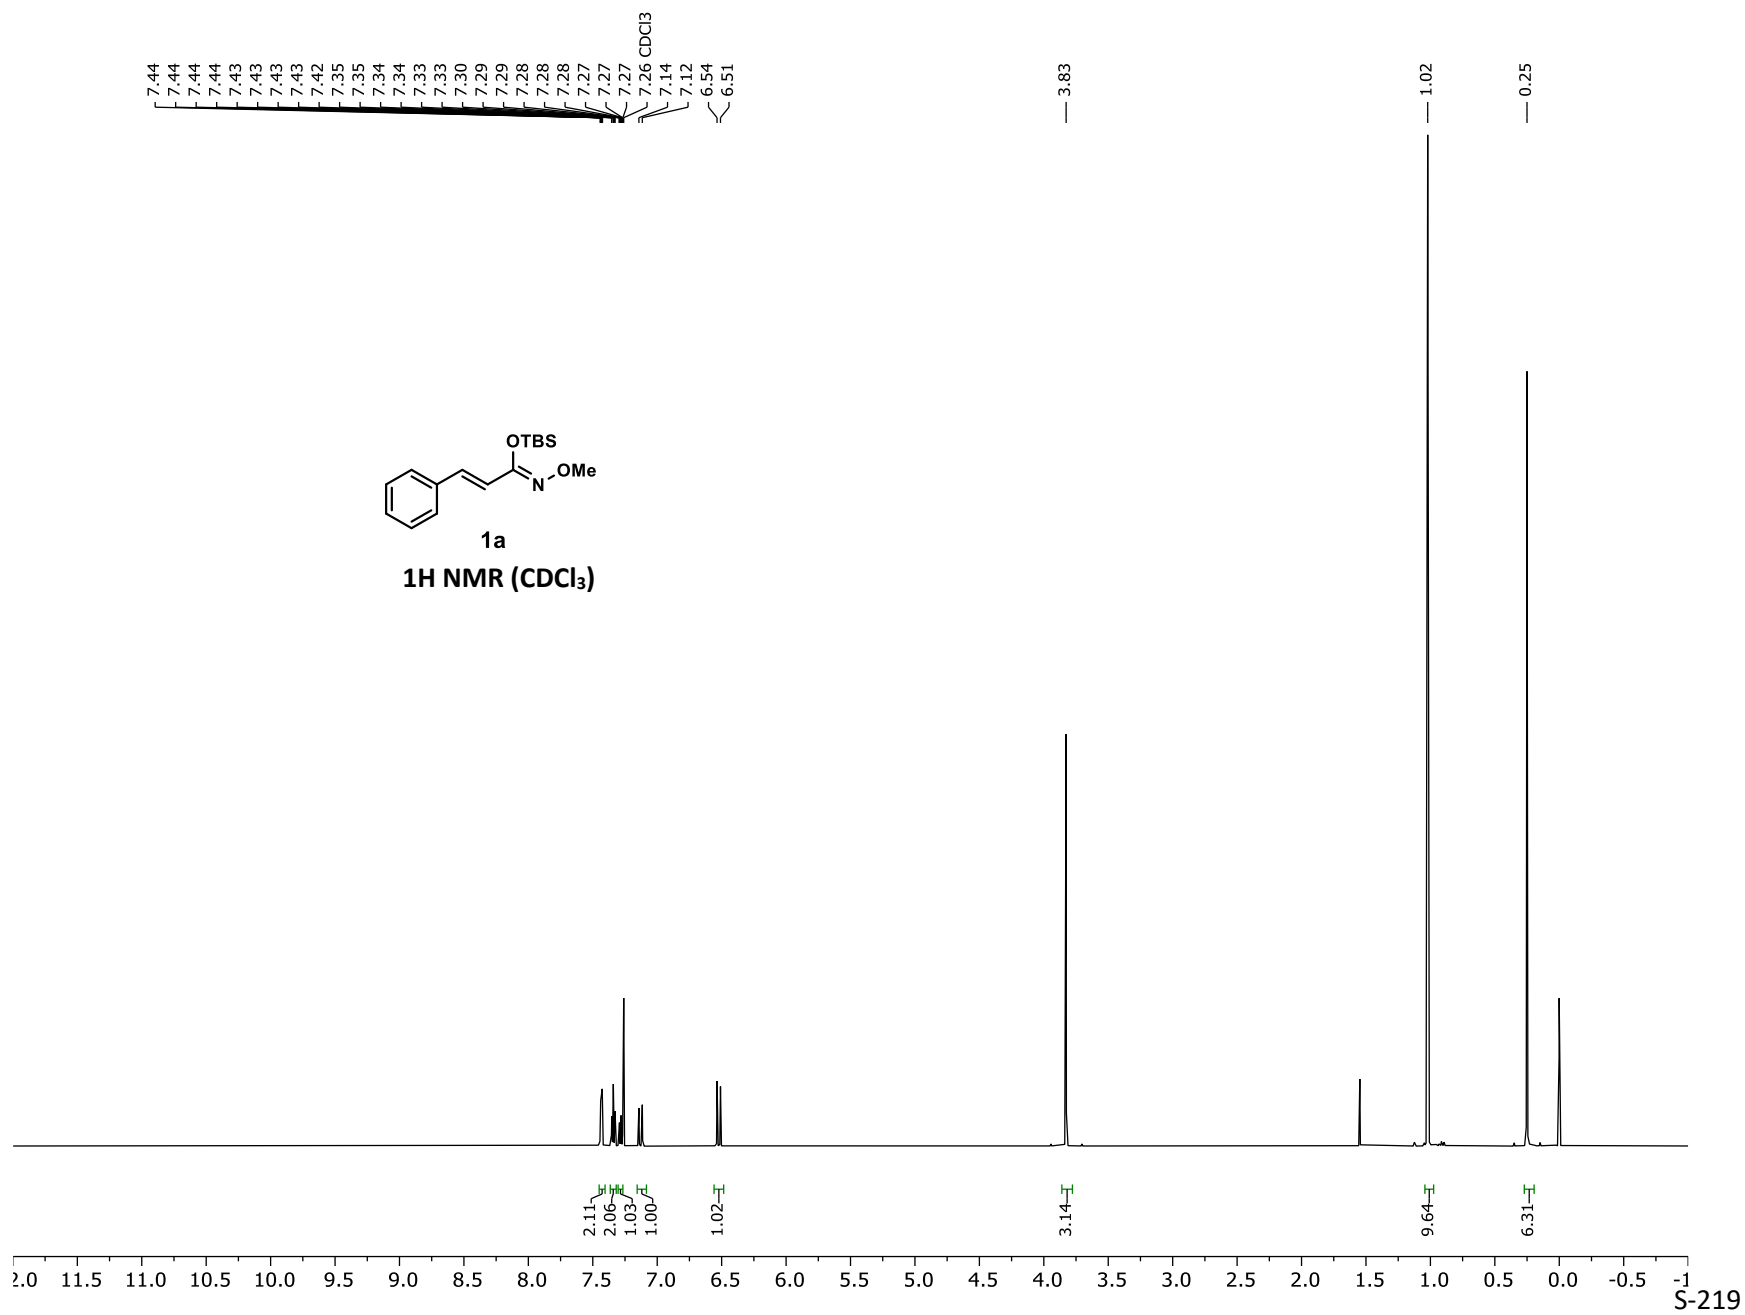

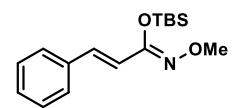

**<sup>13</sup>C NMR (CDCl<sub>3</sub>)**

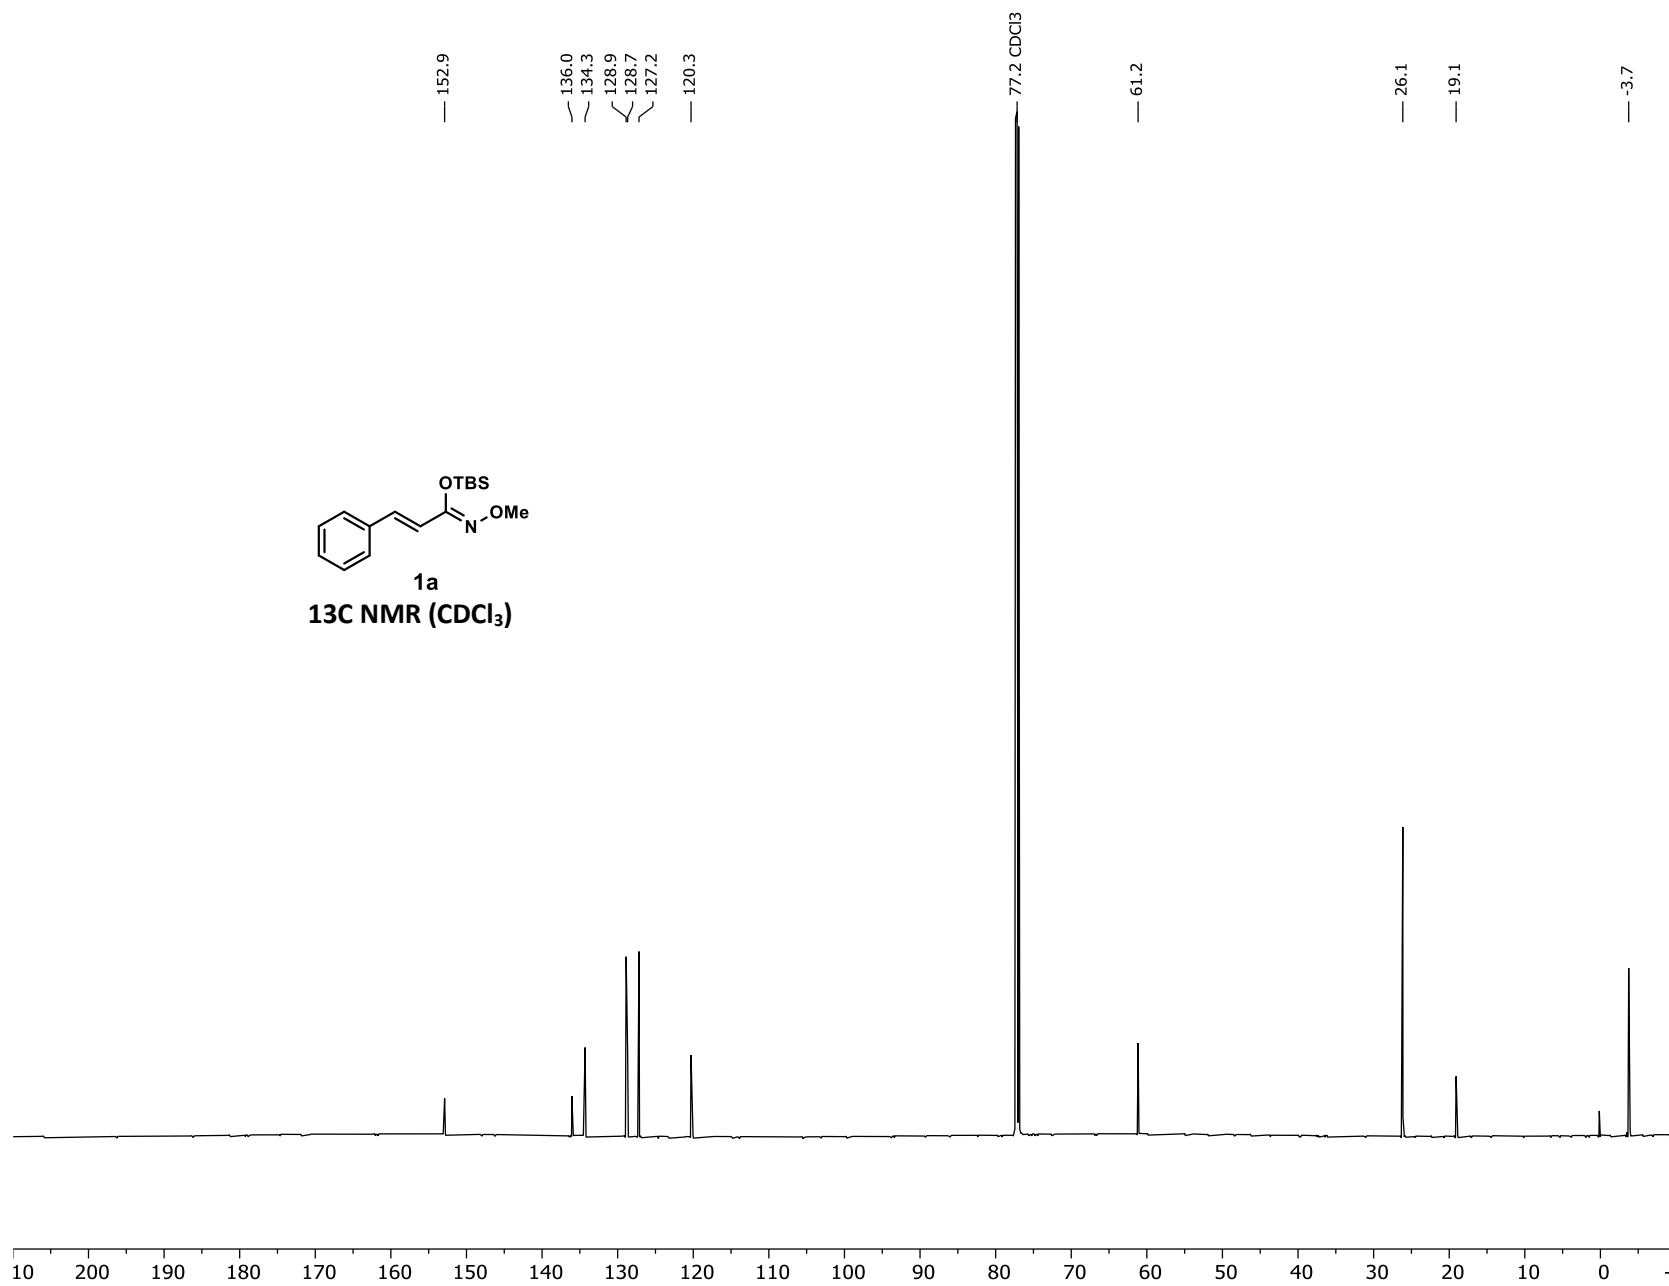



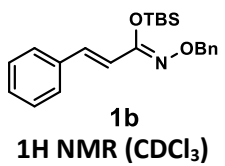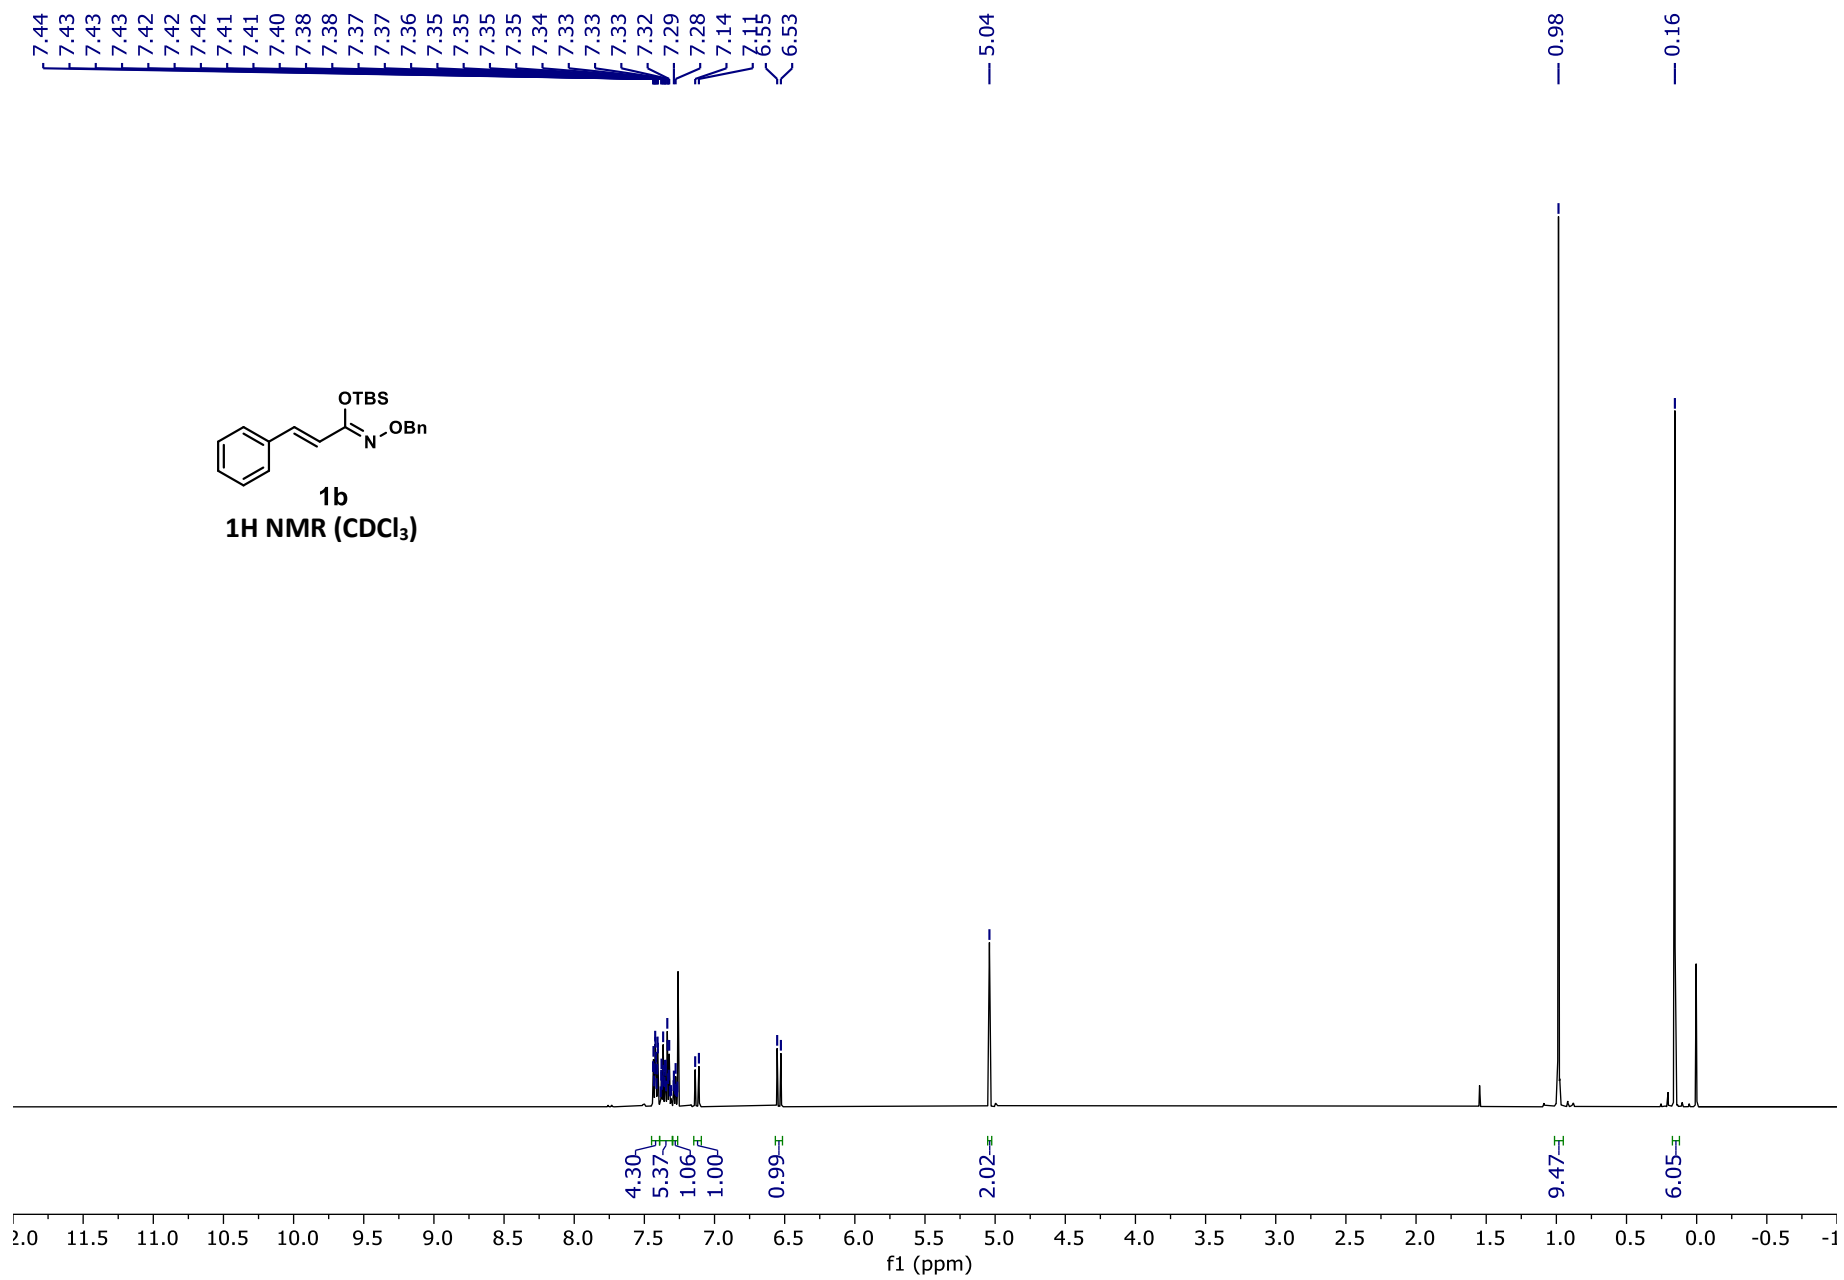

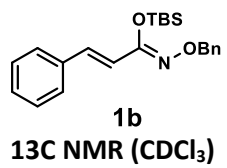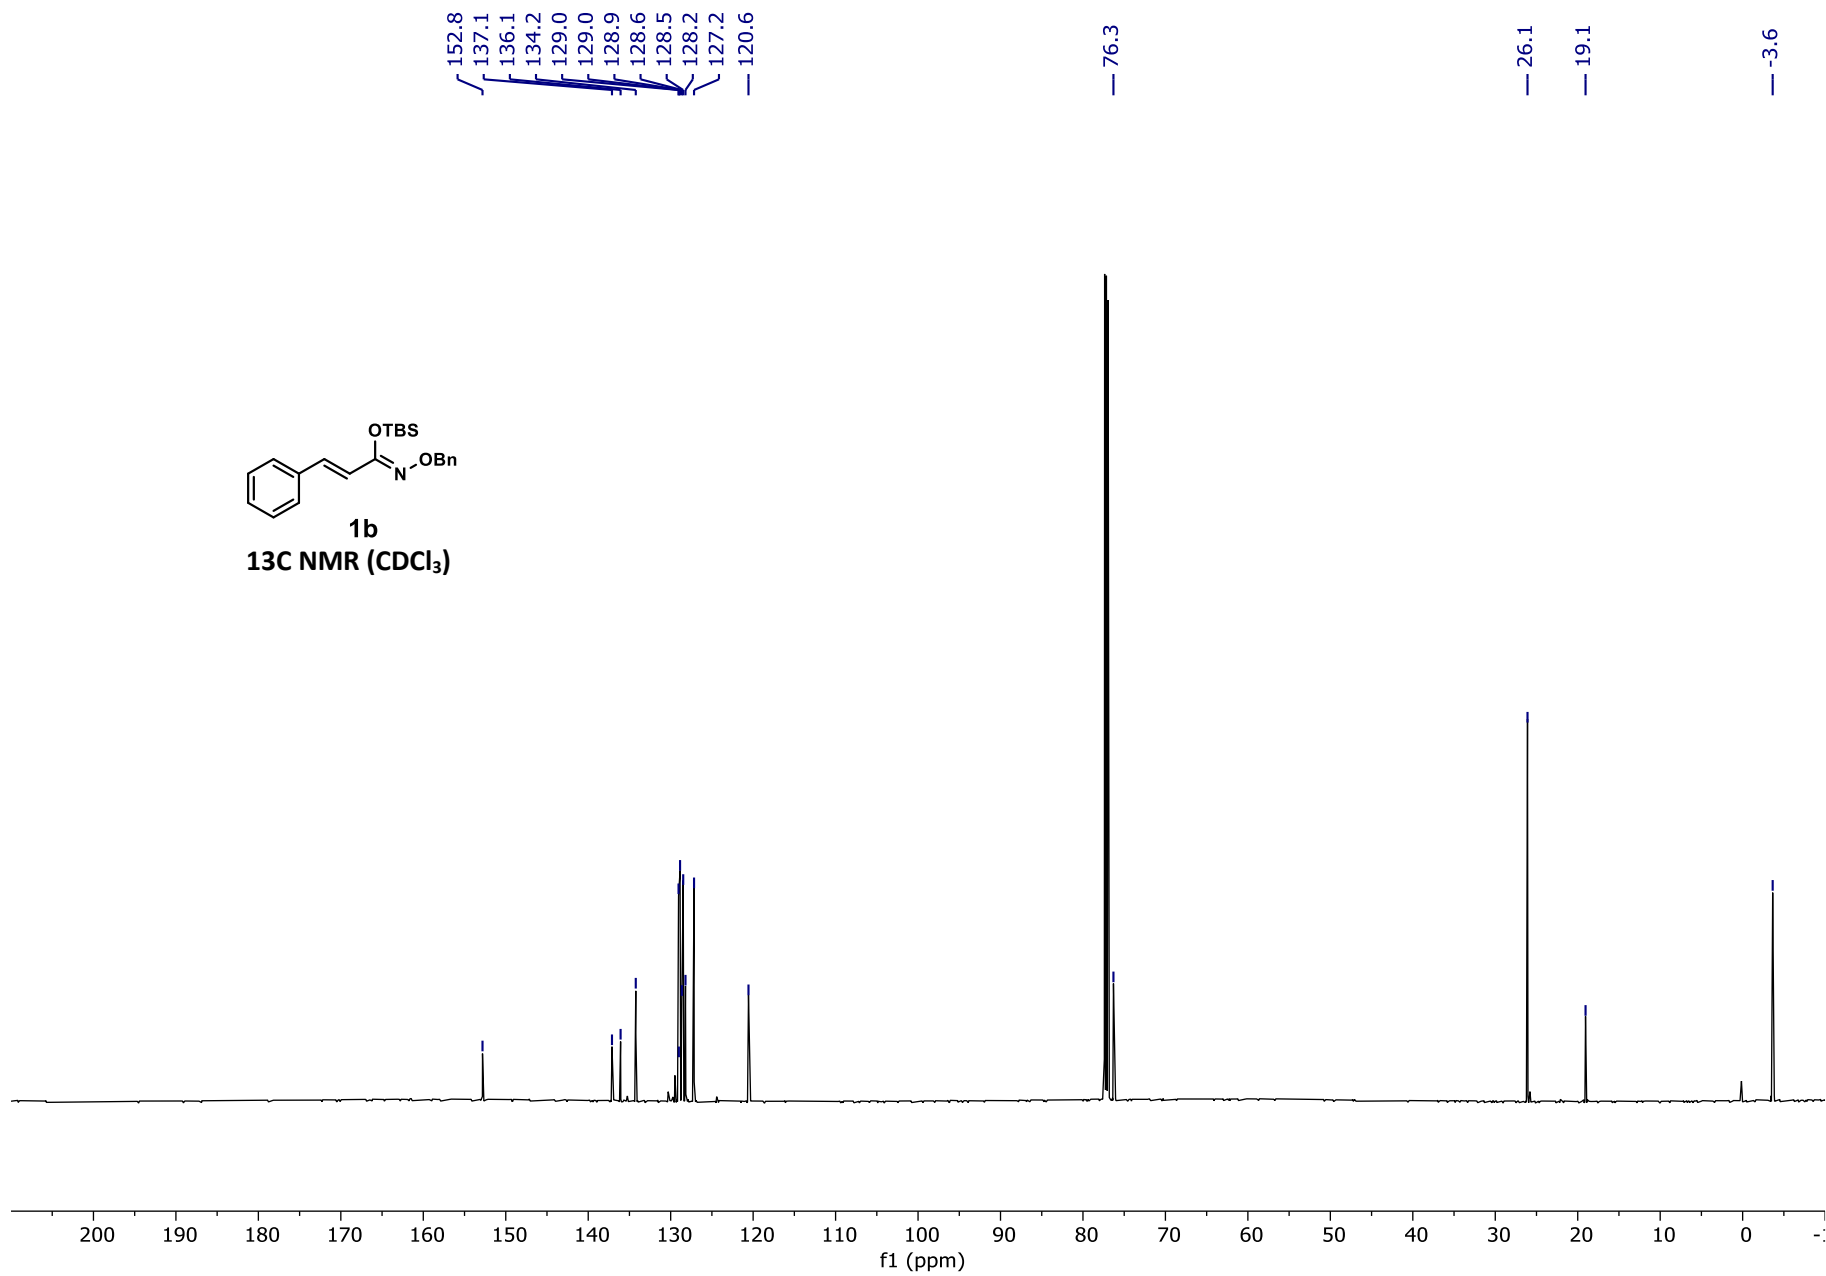

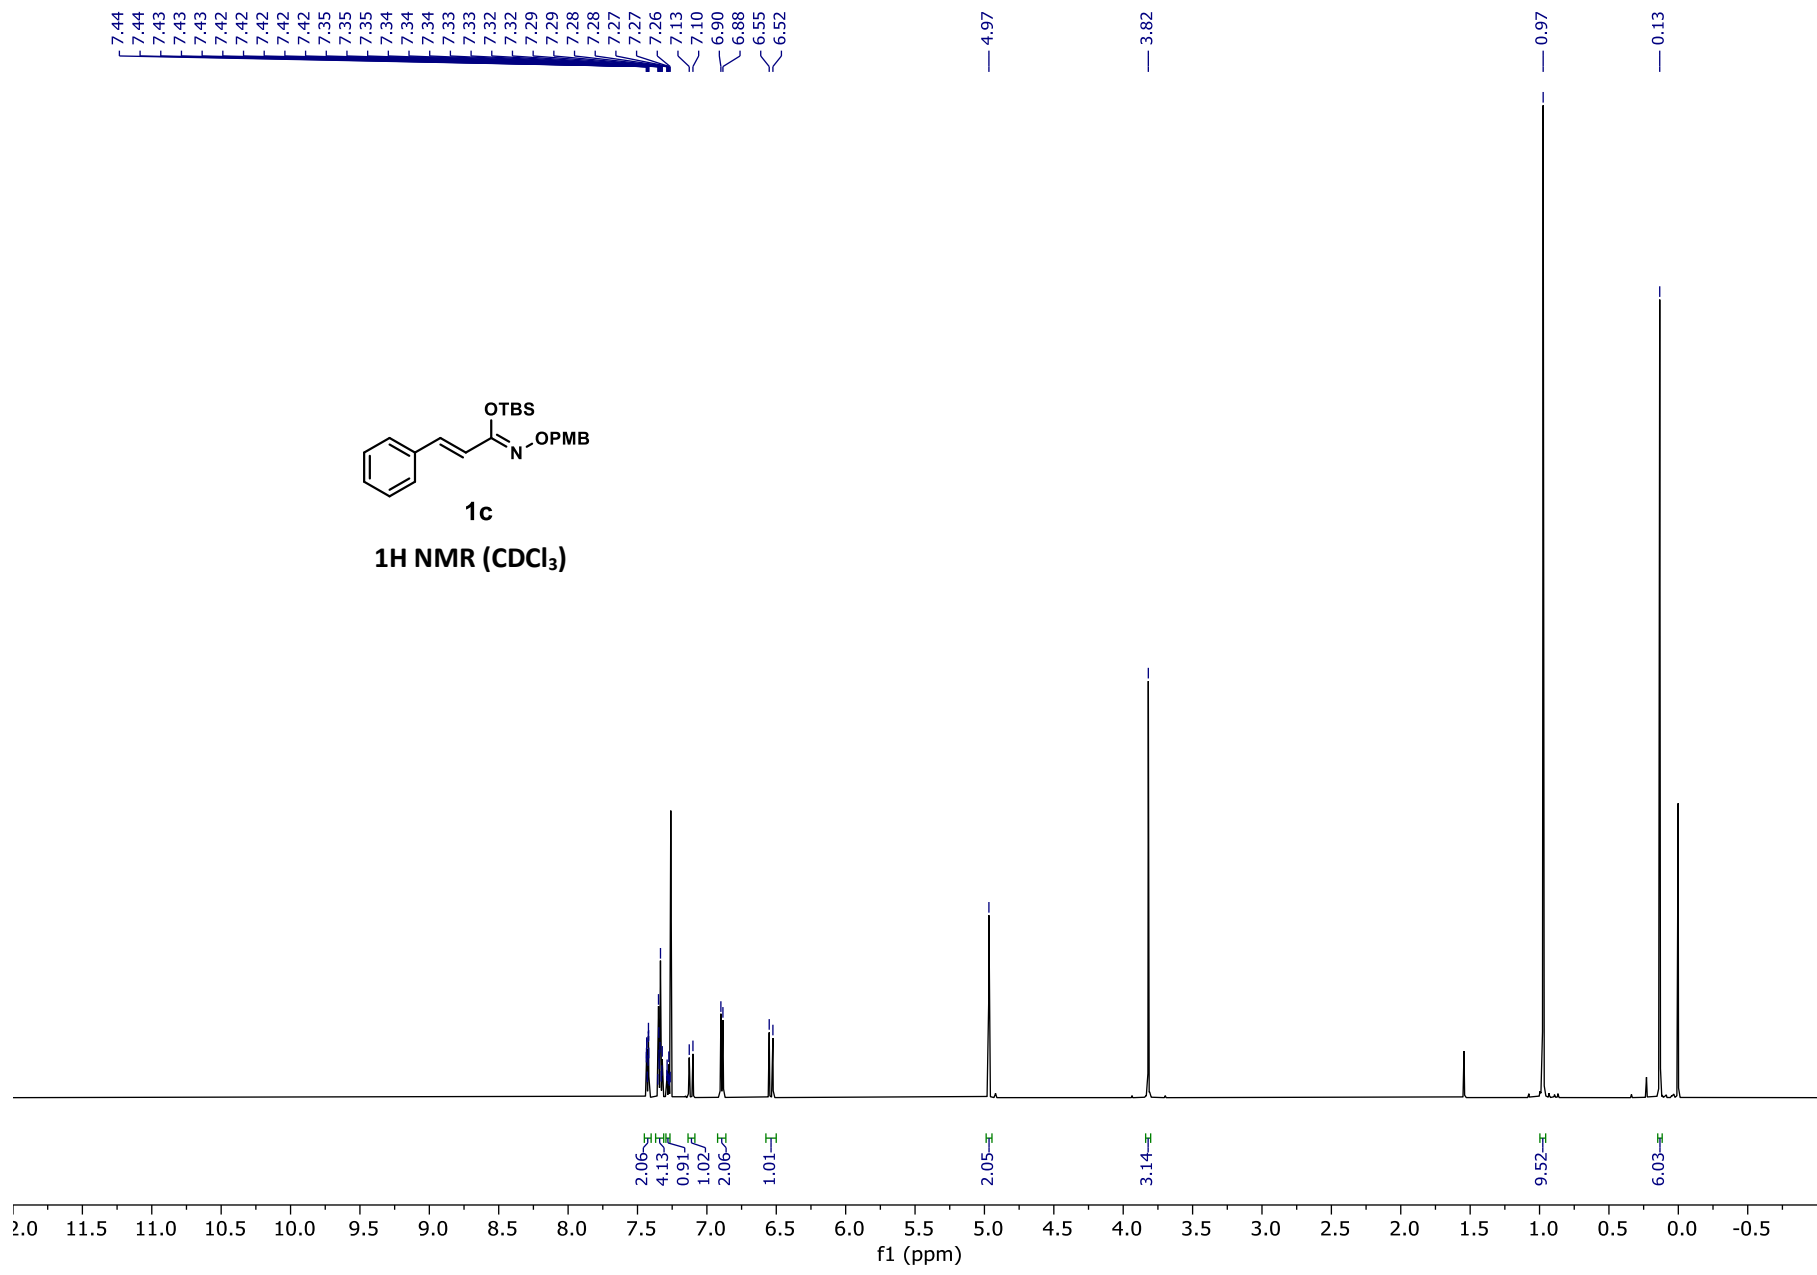

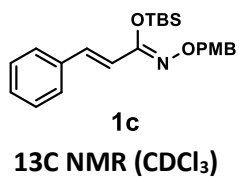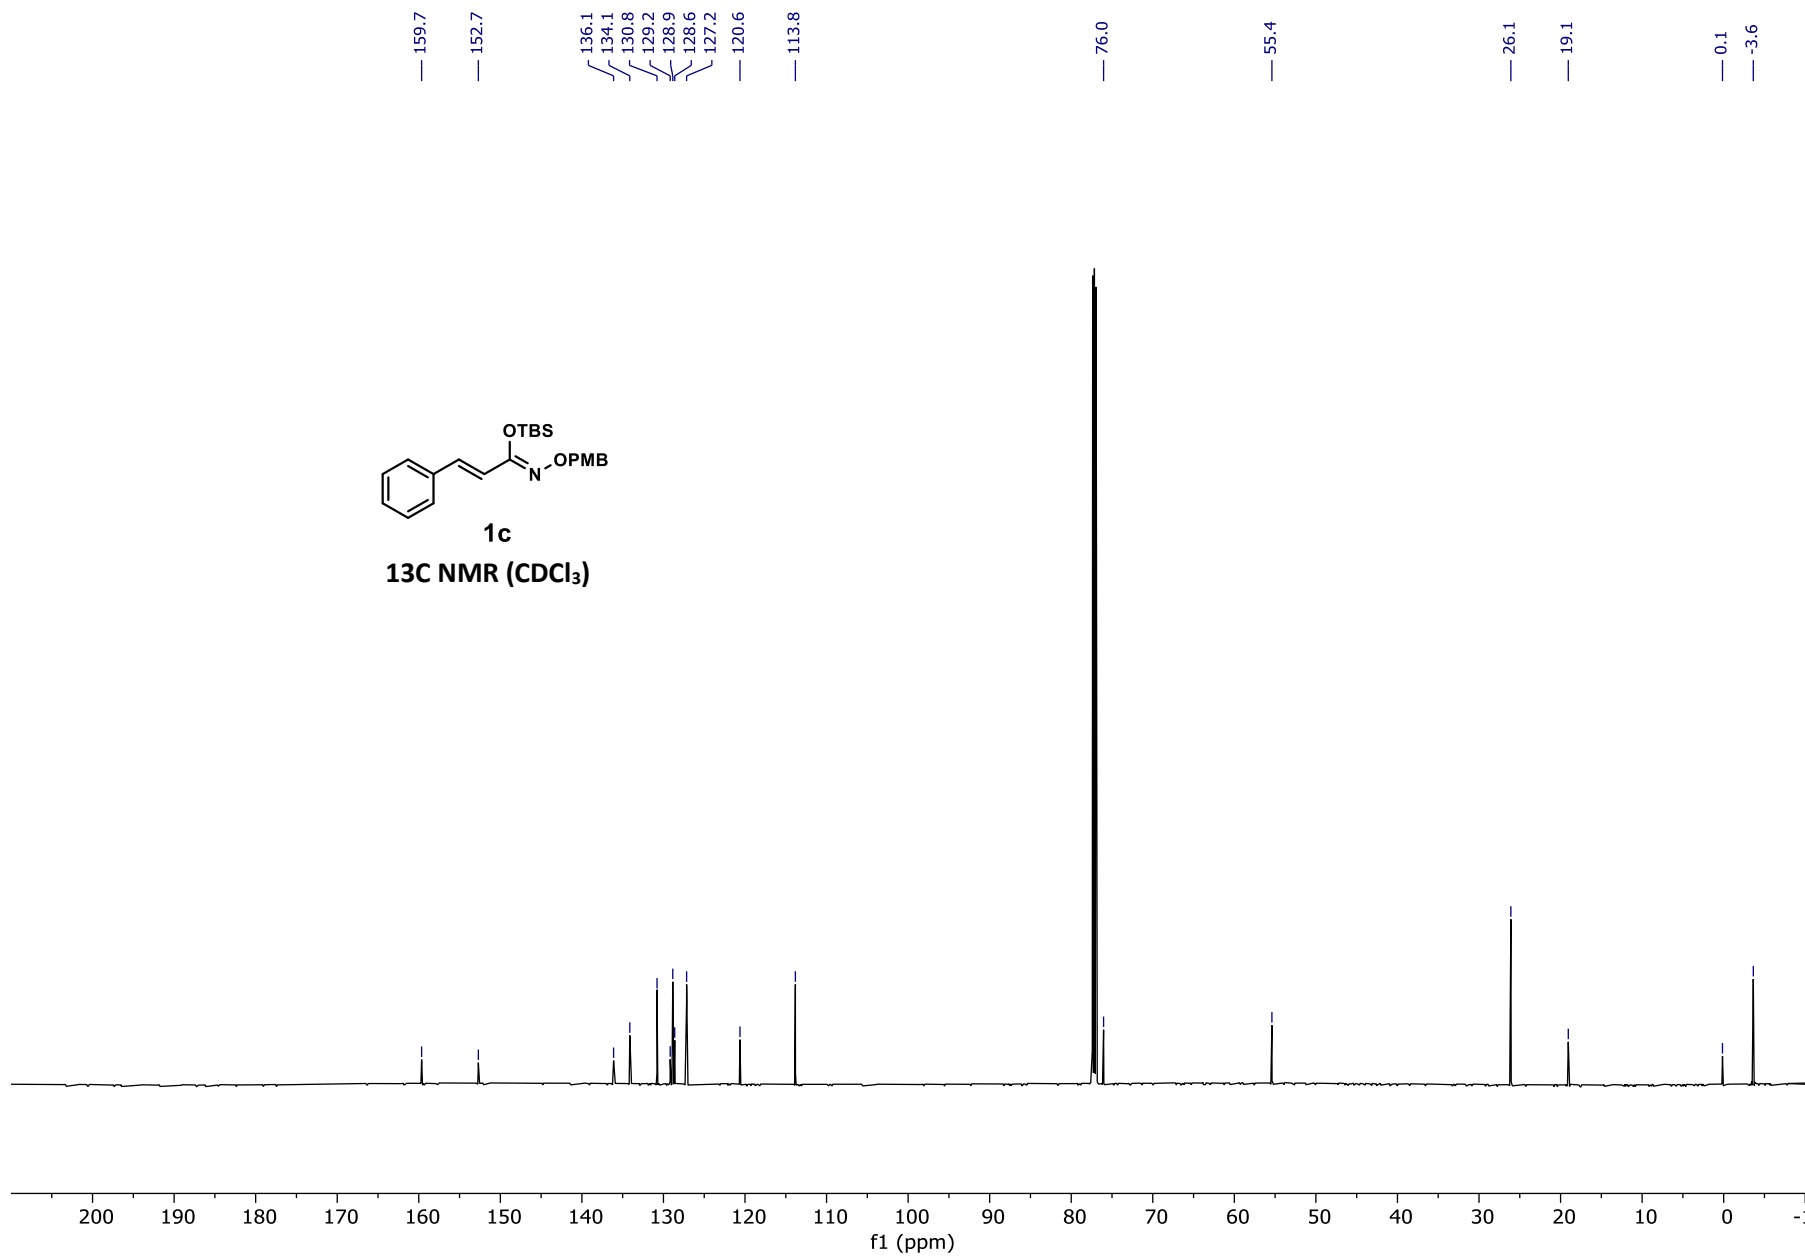

7.46  
7.45  
7.44  
7.44  
7.44  
7.35  
7.33  
7.33  
7.32  
7.28  
7.28  
7.27  
7.27  
7.27  
7.14  
7.11  
6.55  
6.53

1.02  
0.97

0.28  
0.20

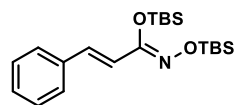

**1d**  
**<sup>1</sup>H NMR (CDCl<sub>3</sub>)**

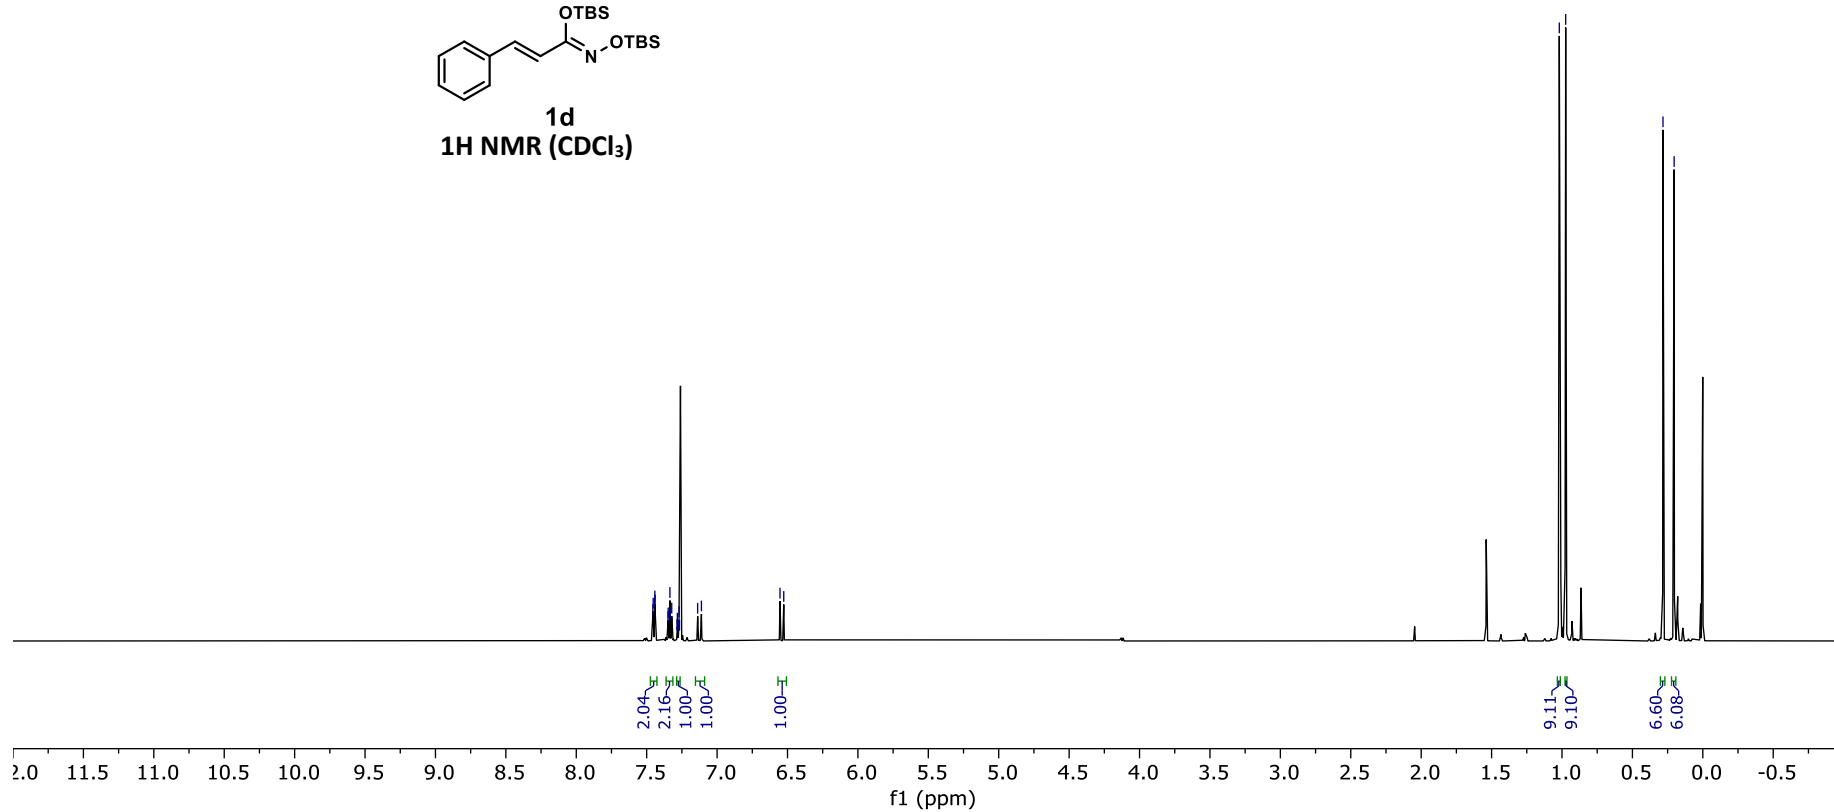

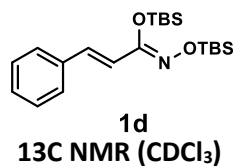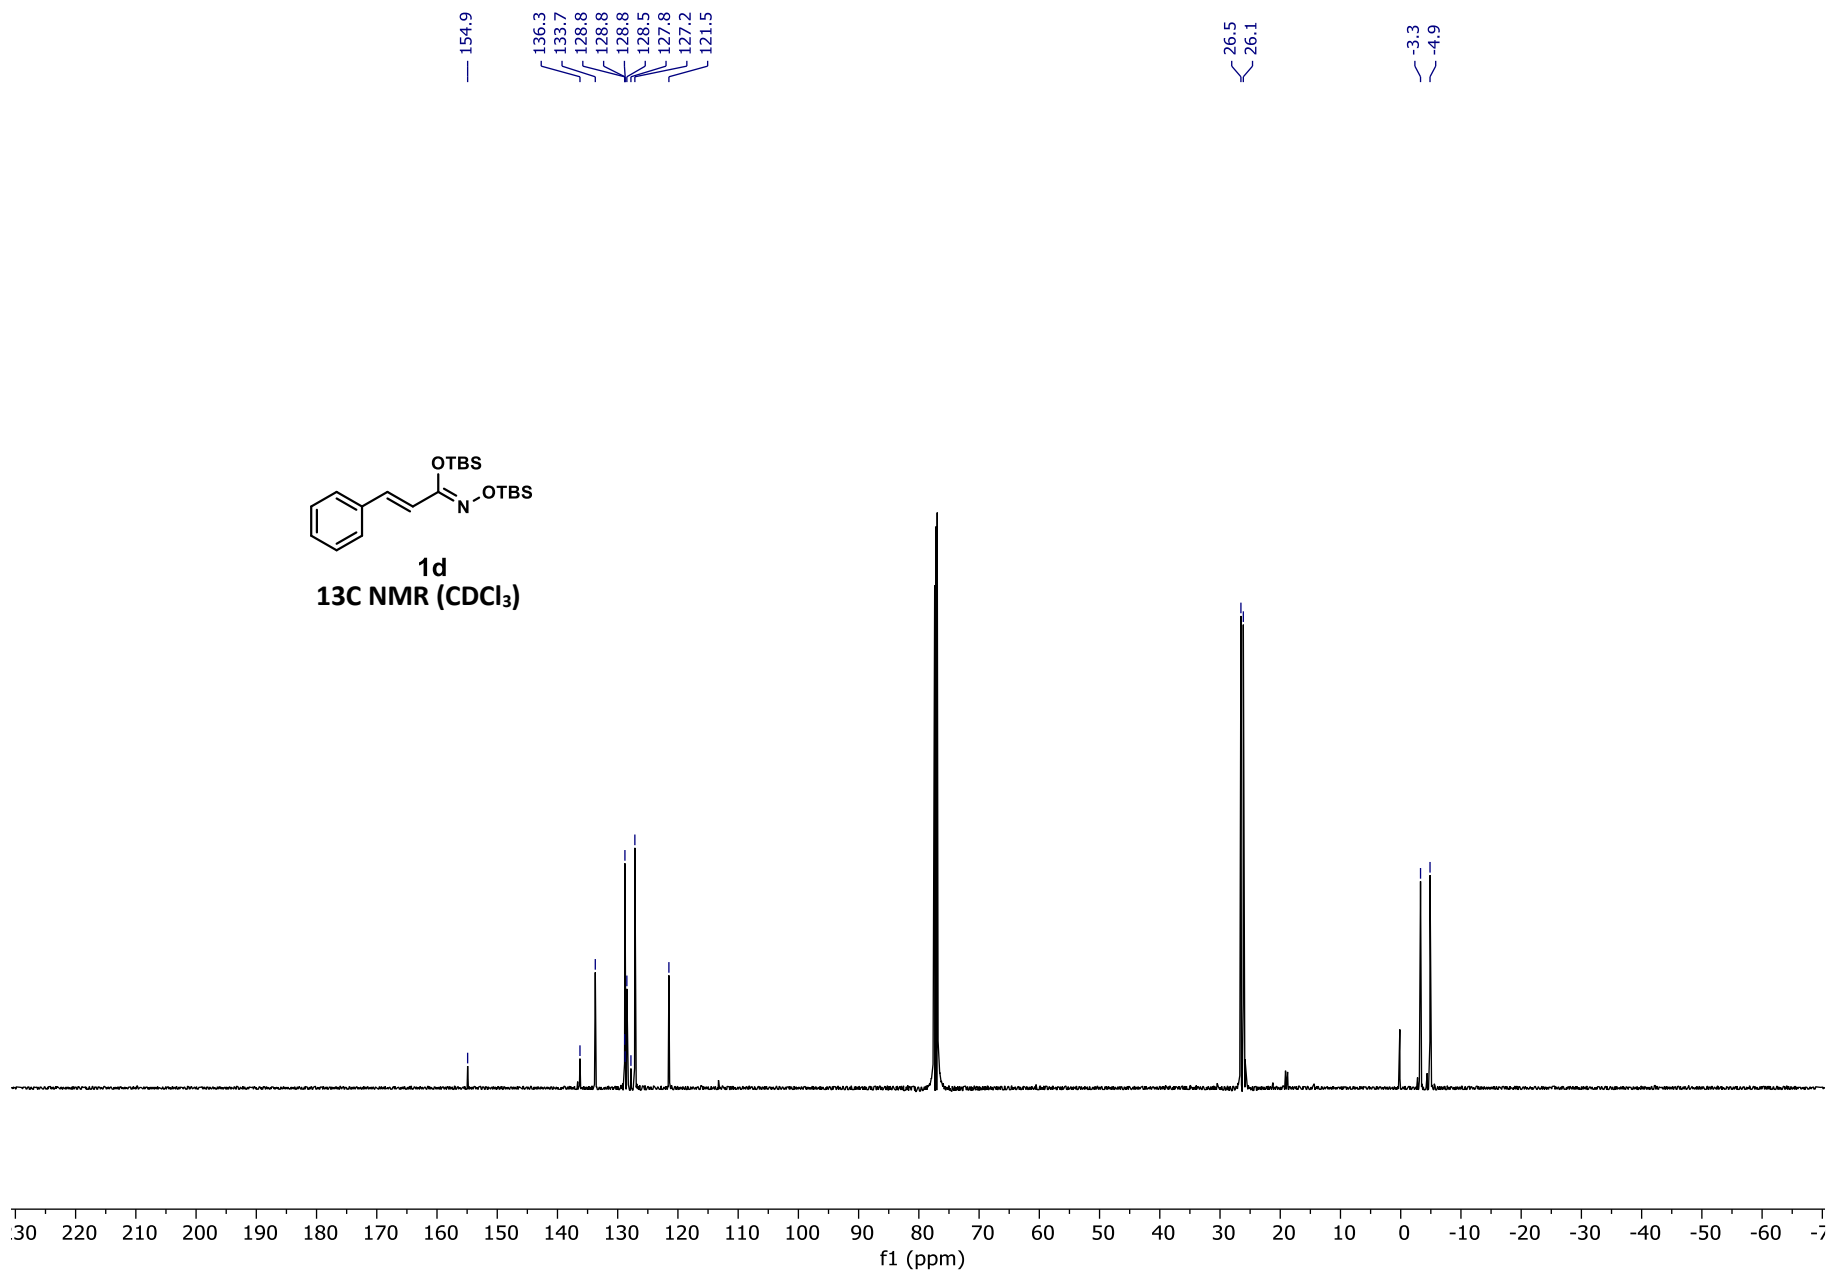

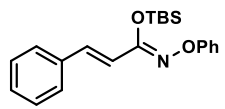

1e

<sup>1</sup>H NMR (CDCl<sub>3</sub>)

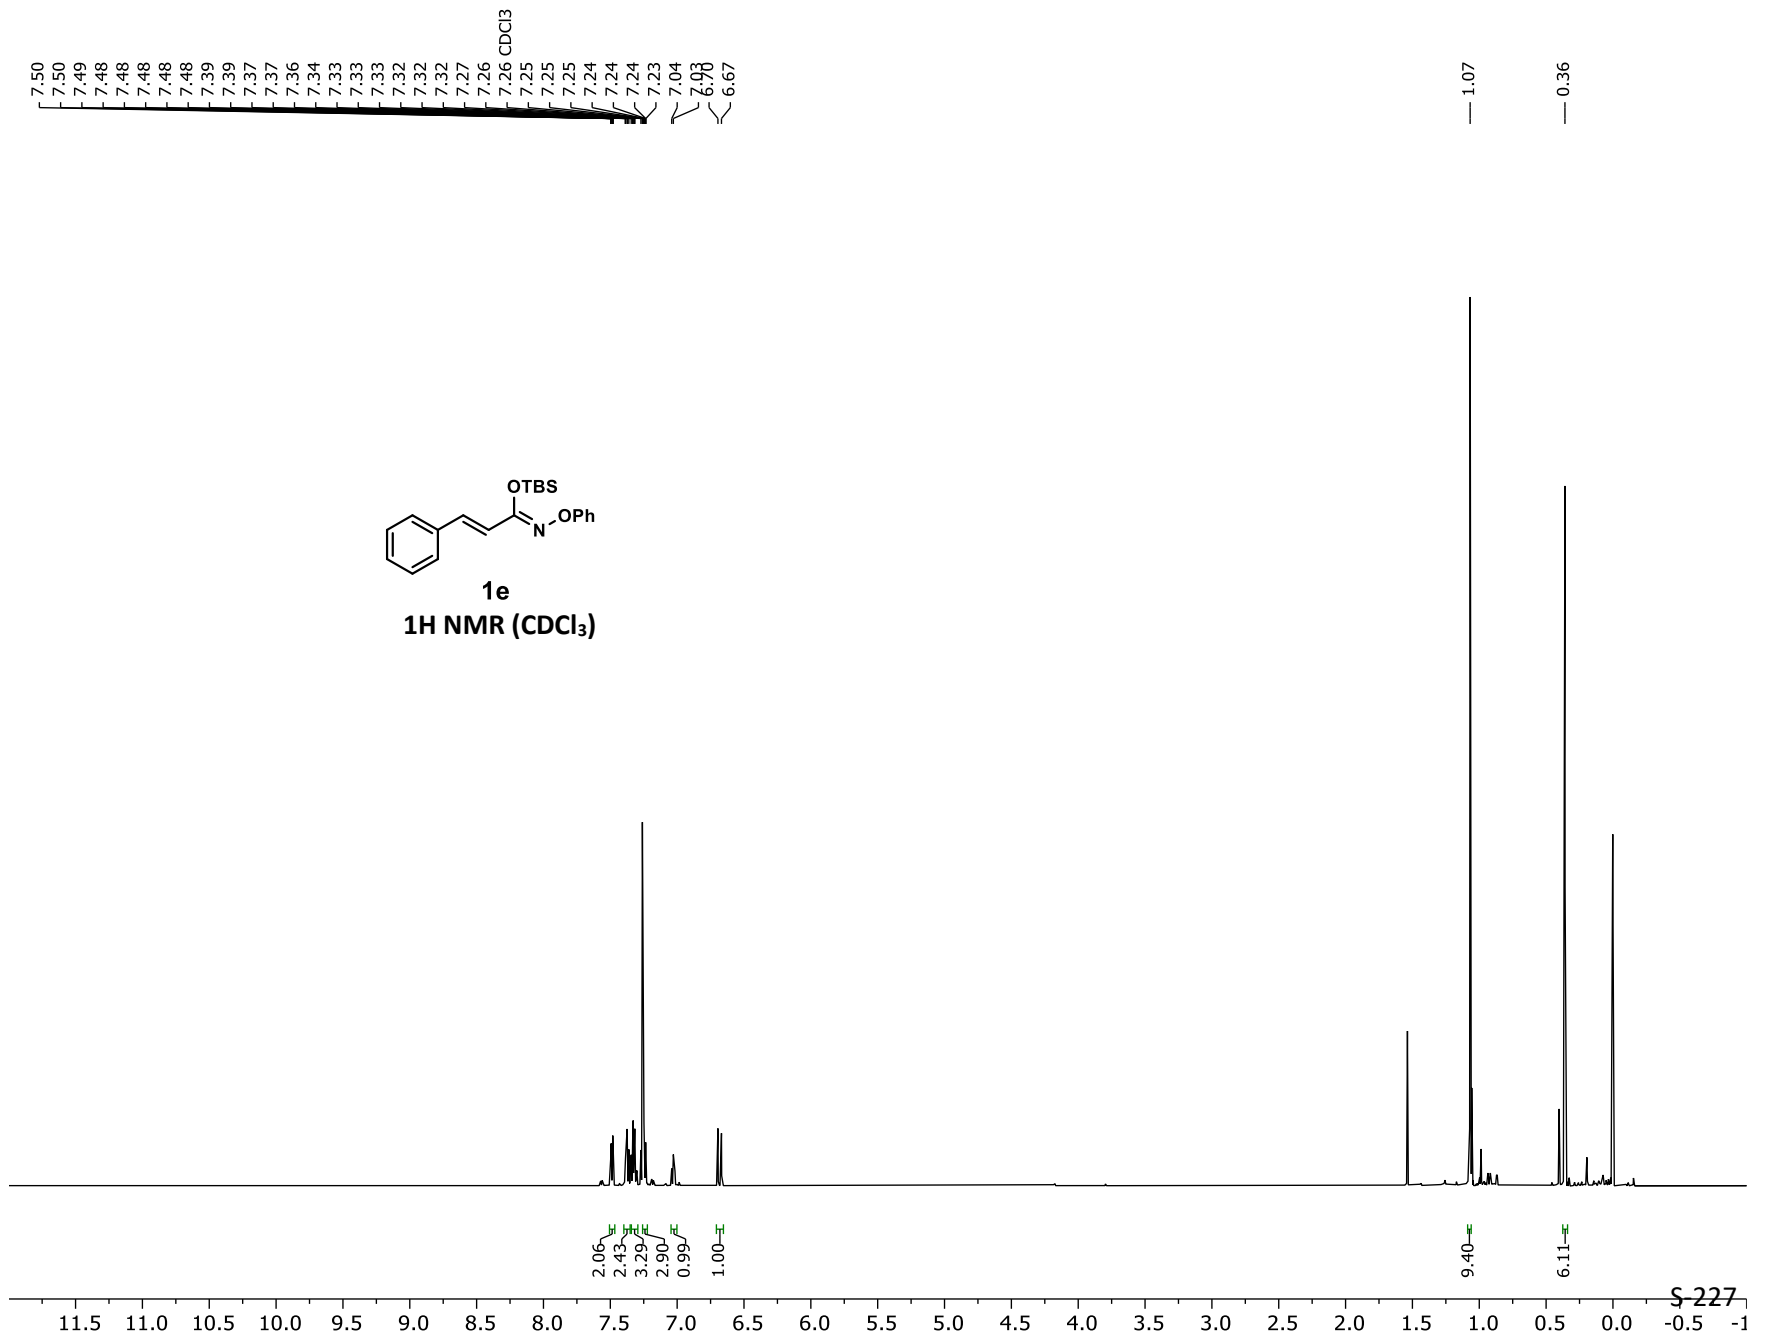

— 159.0  
— 155.0  
  
— 135.8  
129.5  
129.0  
129.0  
127.4  
122.3  
120.1  
114.8

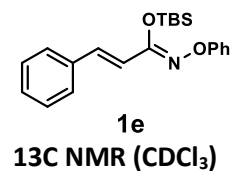

77.2 CDCl<sub>3</sub>

— 26.1  
— 19.1  
  
— -3.6

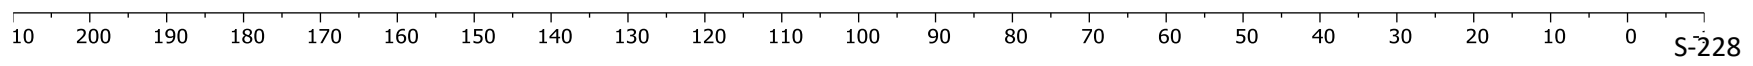





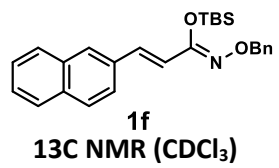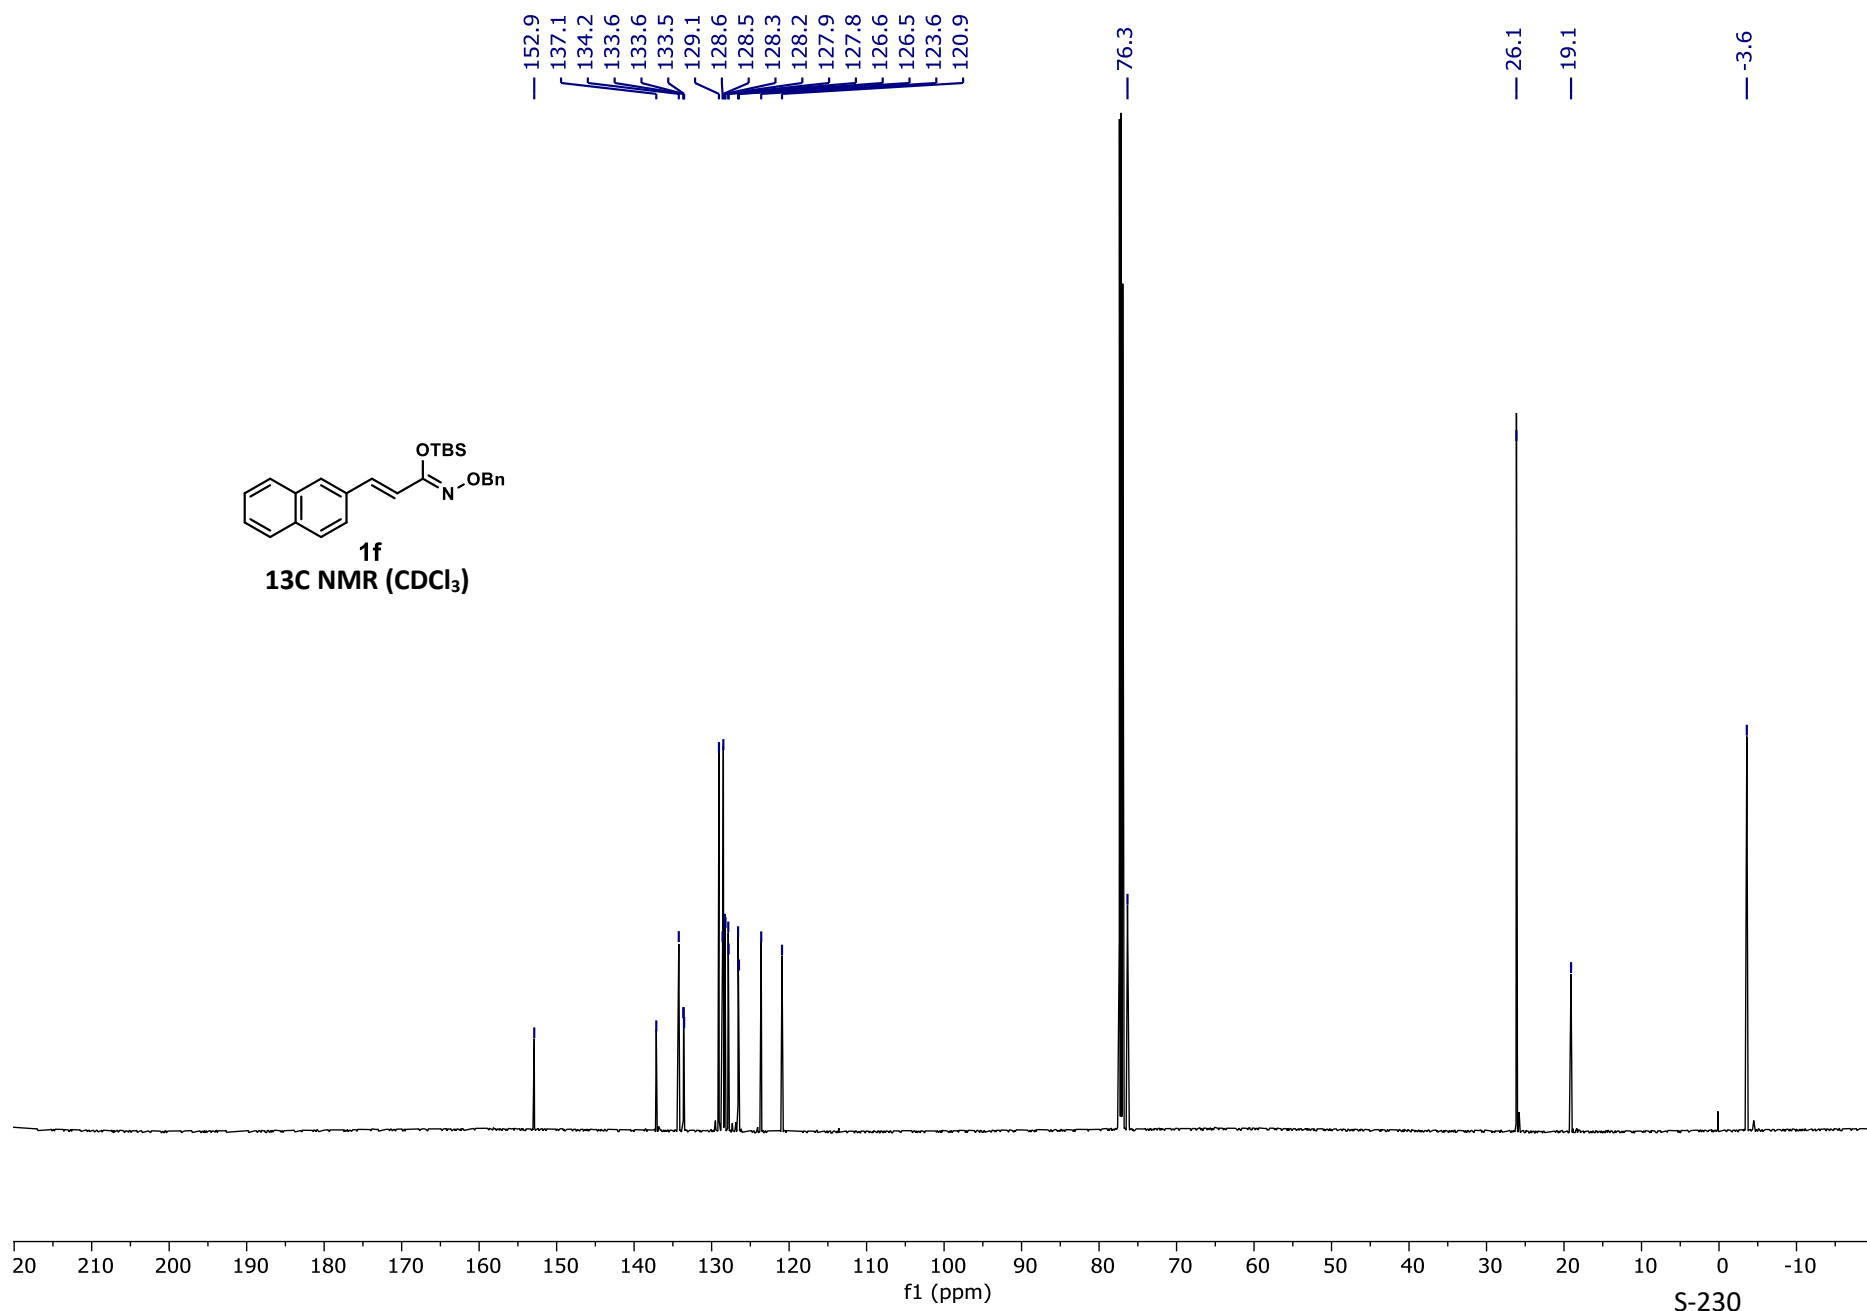

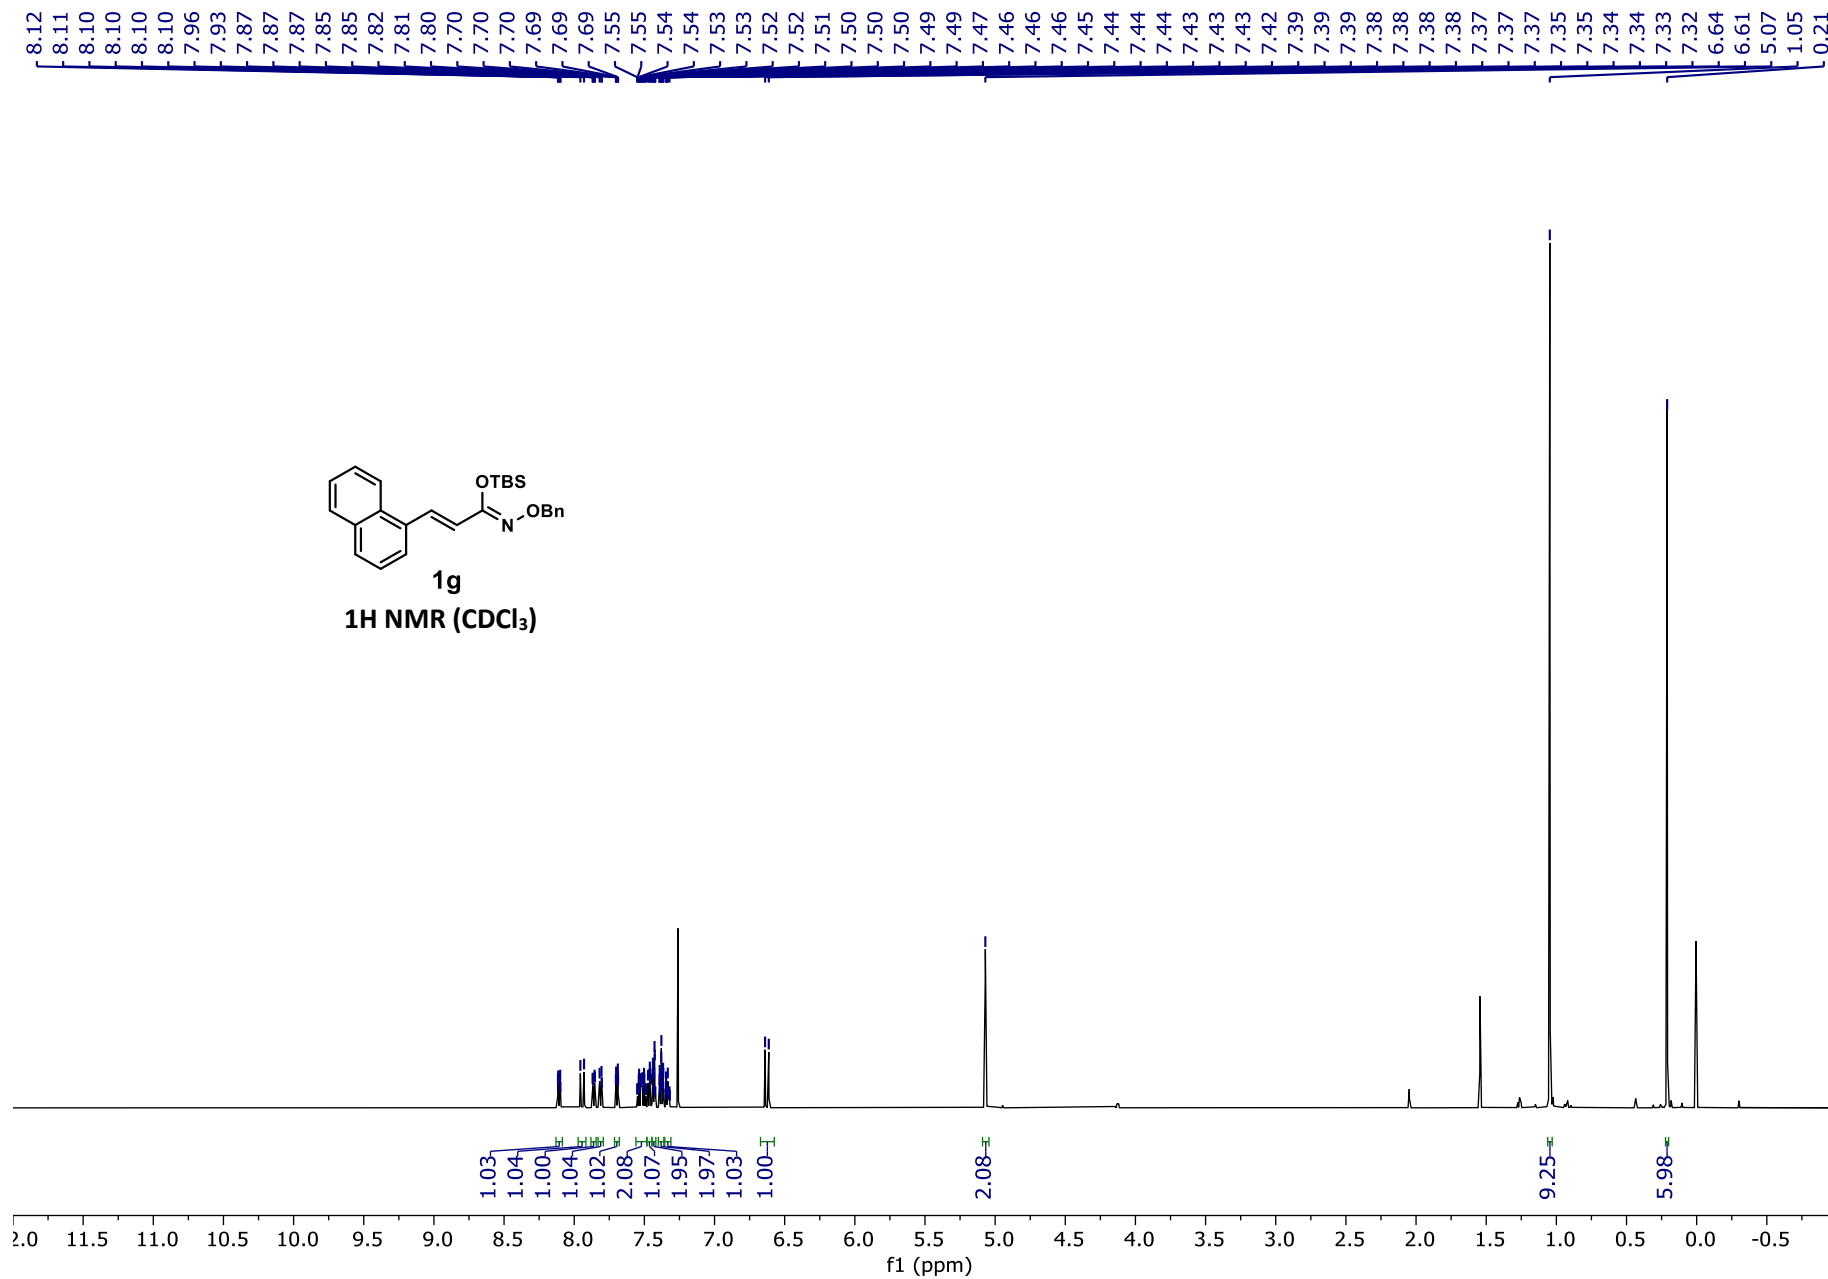

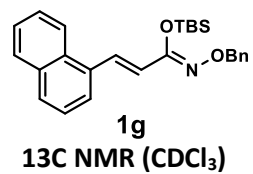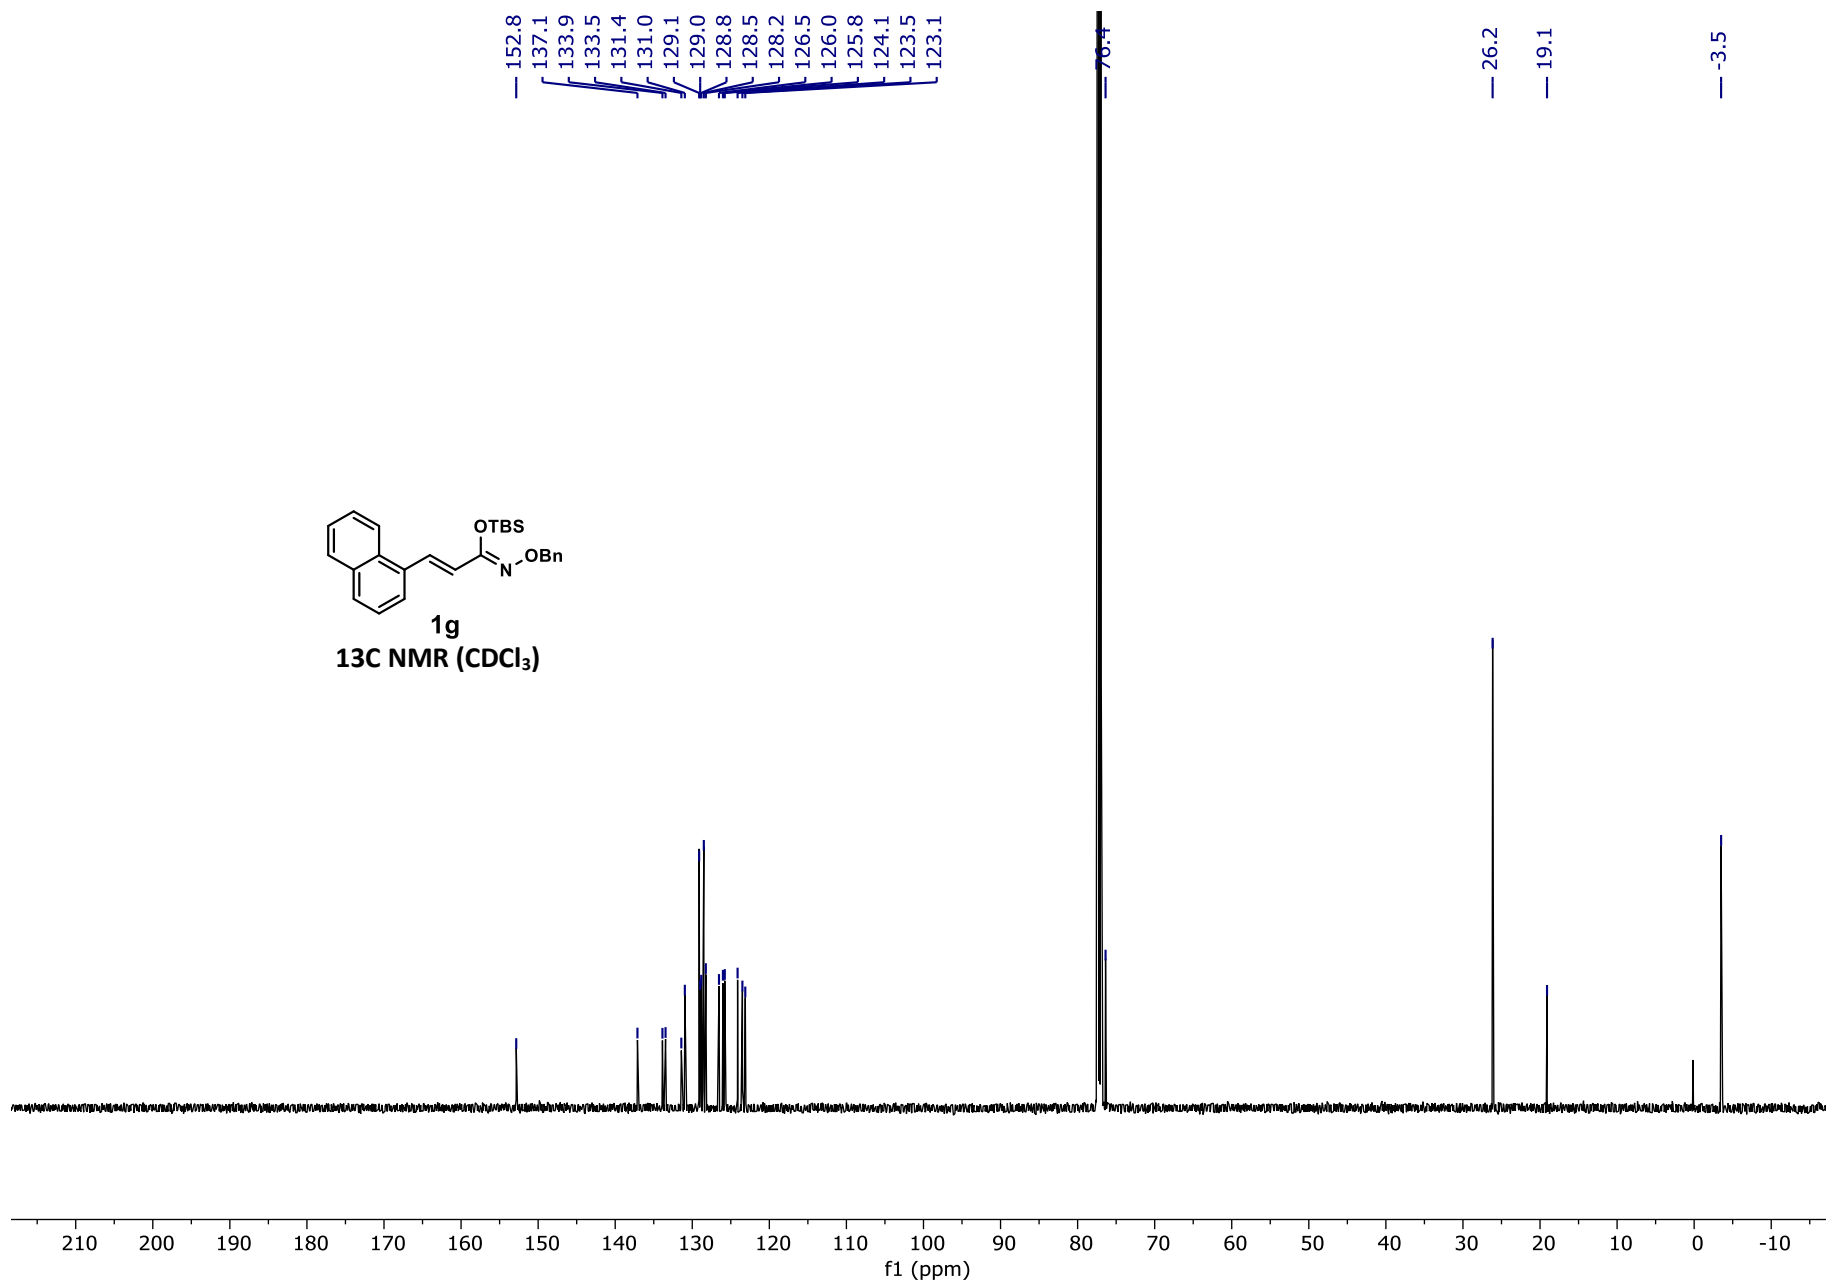

7.71  
7.70  
7.66  
7.45  
7.44  
7.43  
7.43  
7.40  
7.40  
7.40  
7.39  
7.39  
7.38  
7.38  
7.38  
7.37  
7.37  
7.36  
7.36  
7.36  
7.35  
7.35  
7.35  
7.34  
7.34  
7.33  
7.33  
7.33  
7.32  
7.32  
5.10

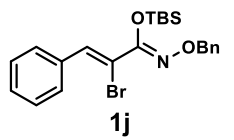

1H NMR (CDCl<sub>3</sub>)

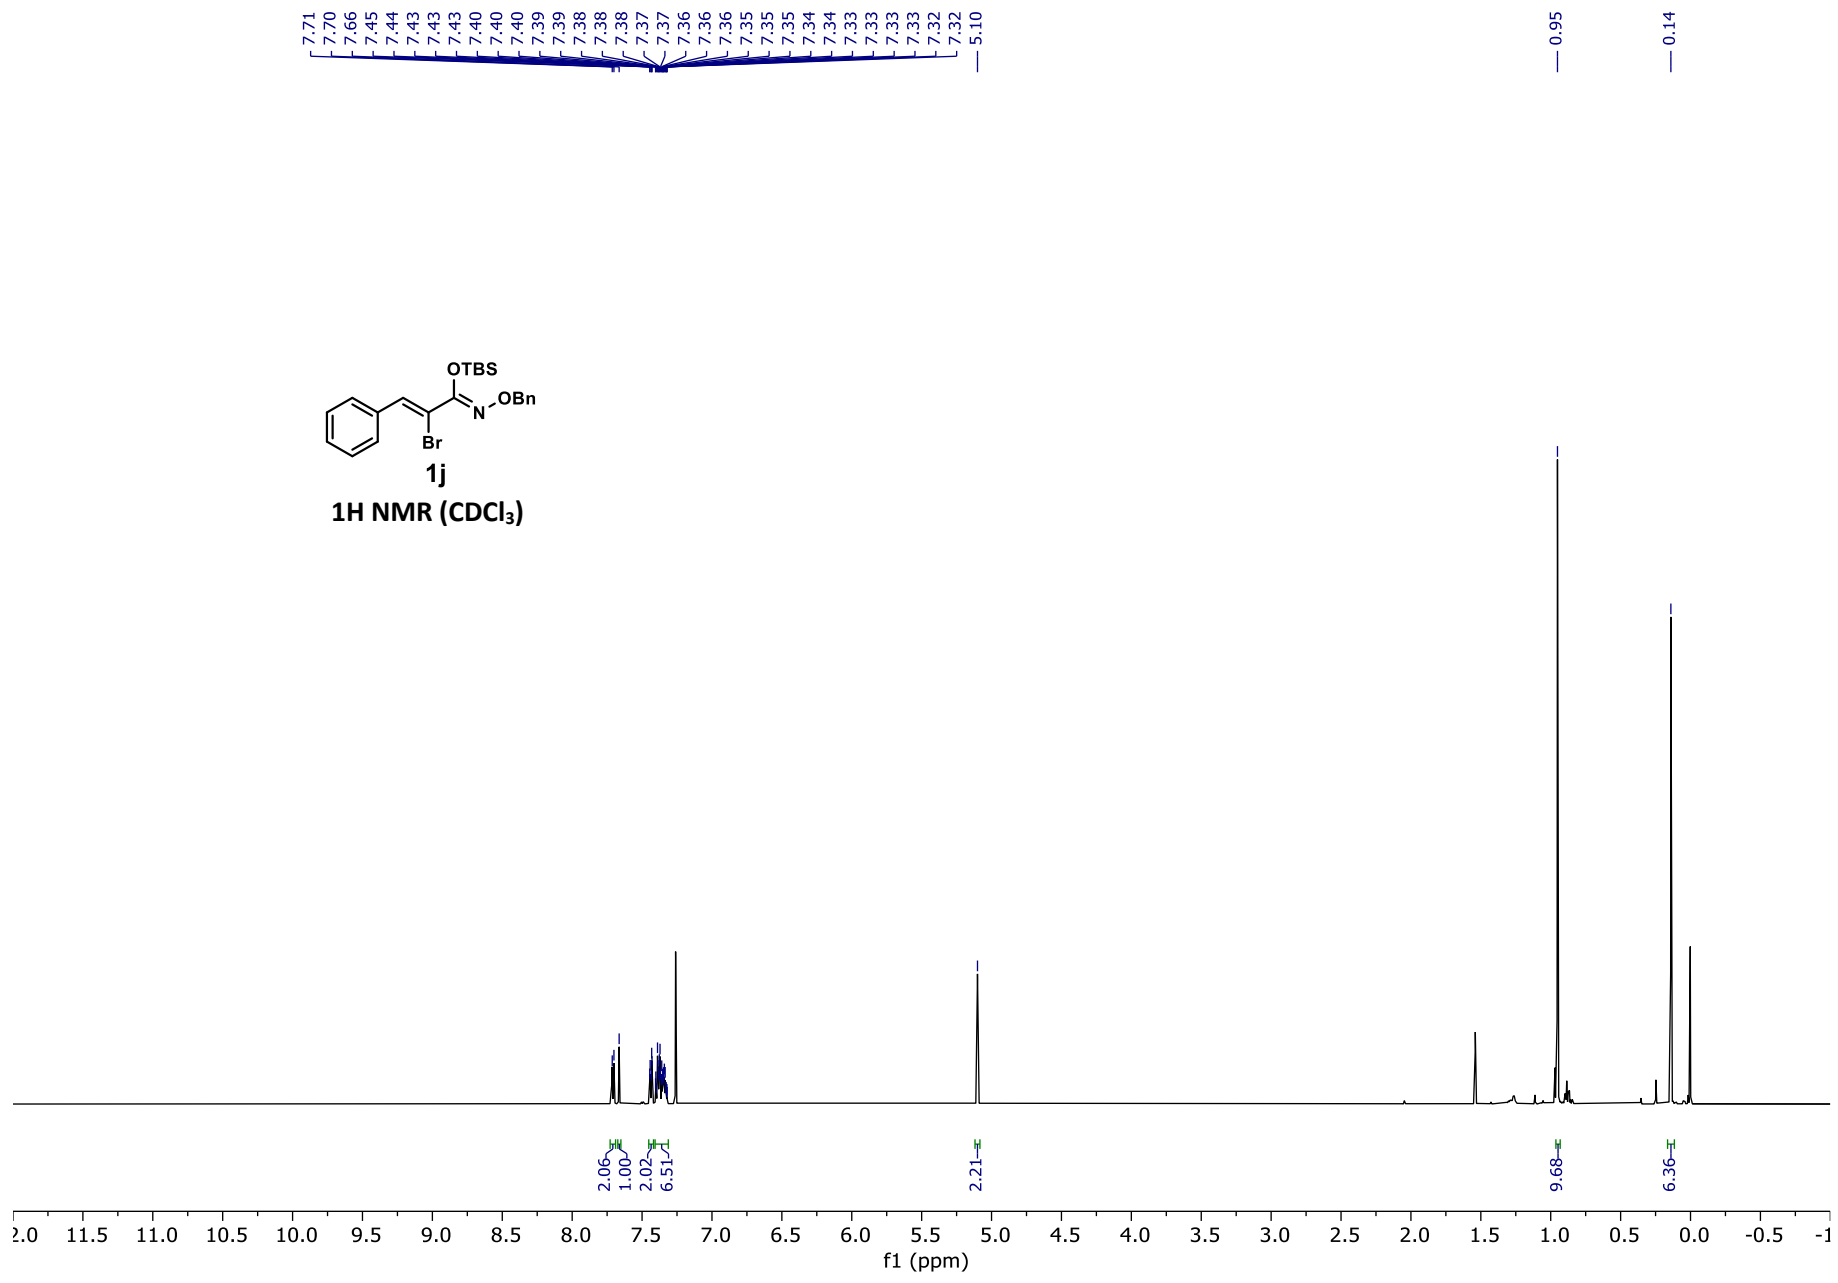

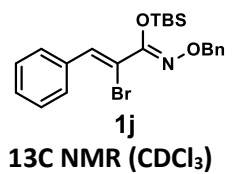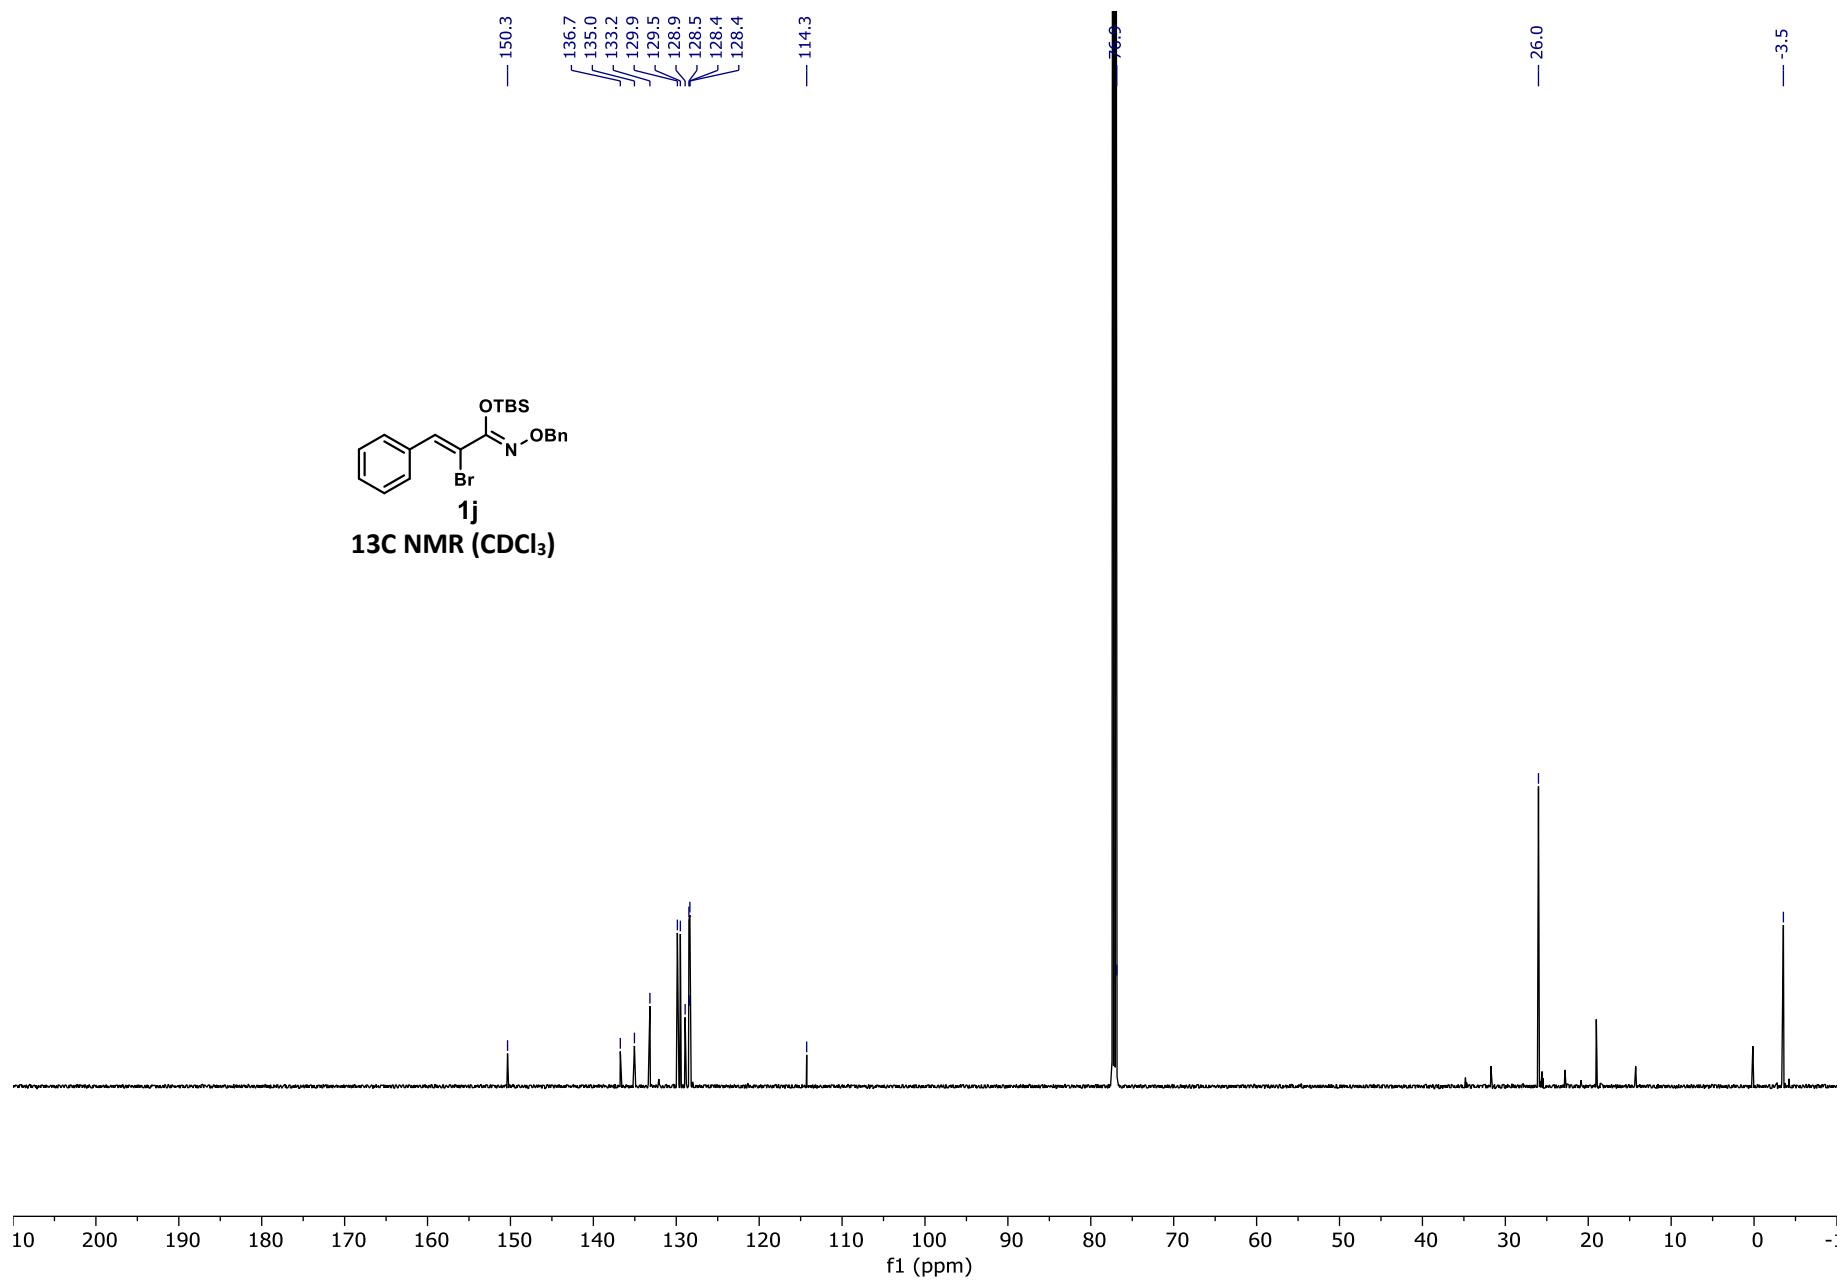

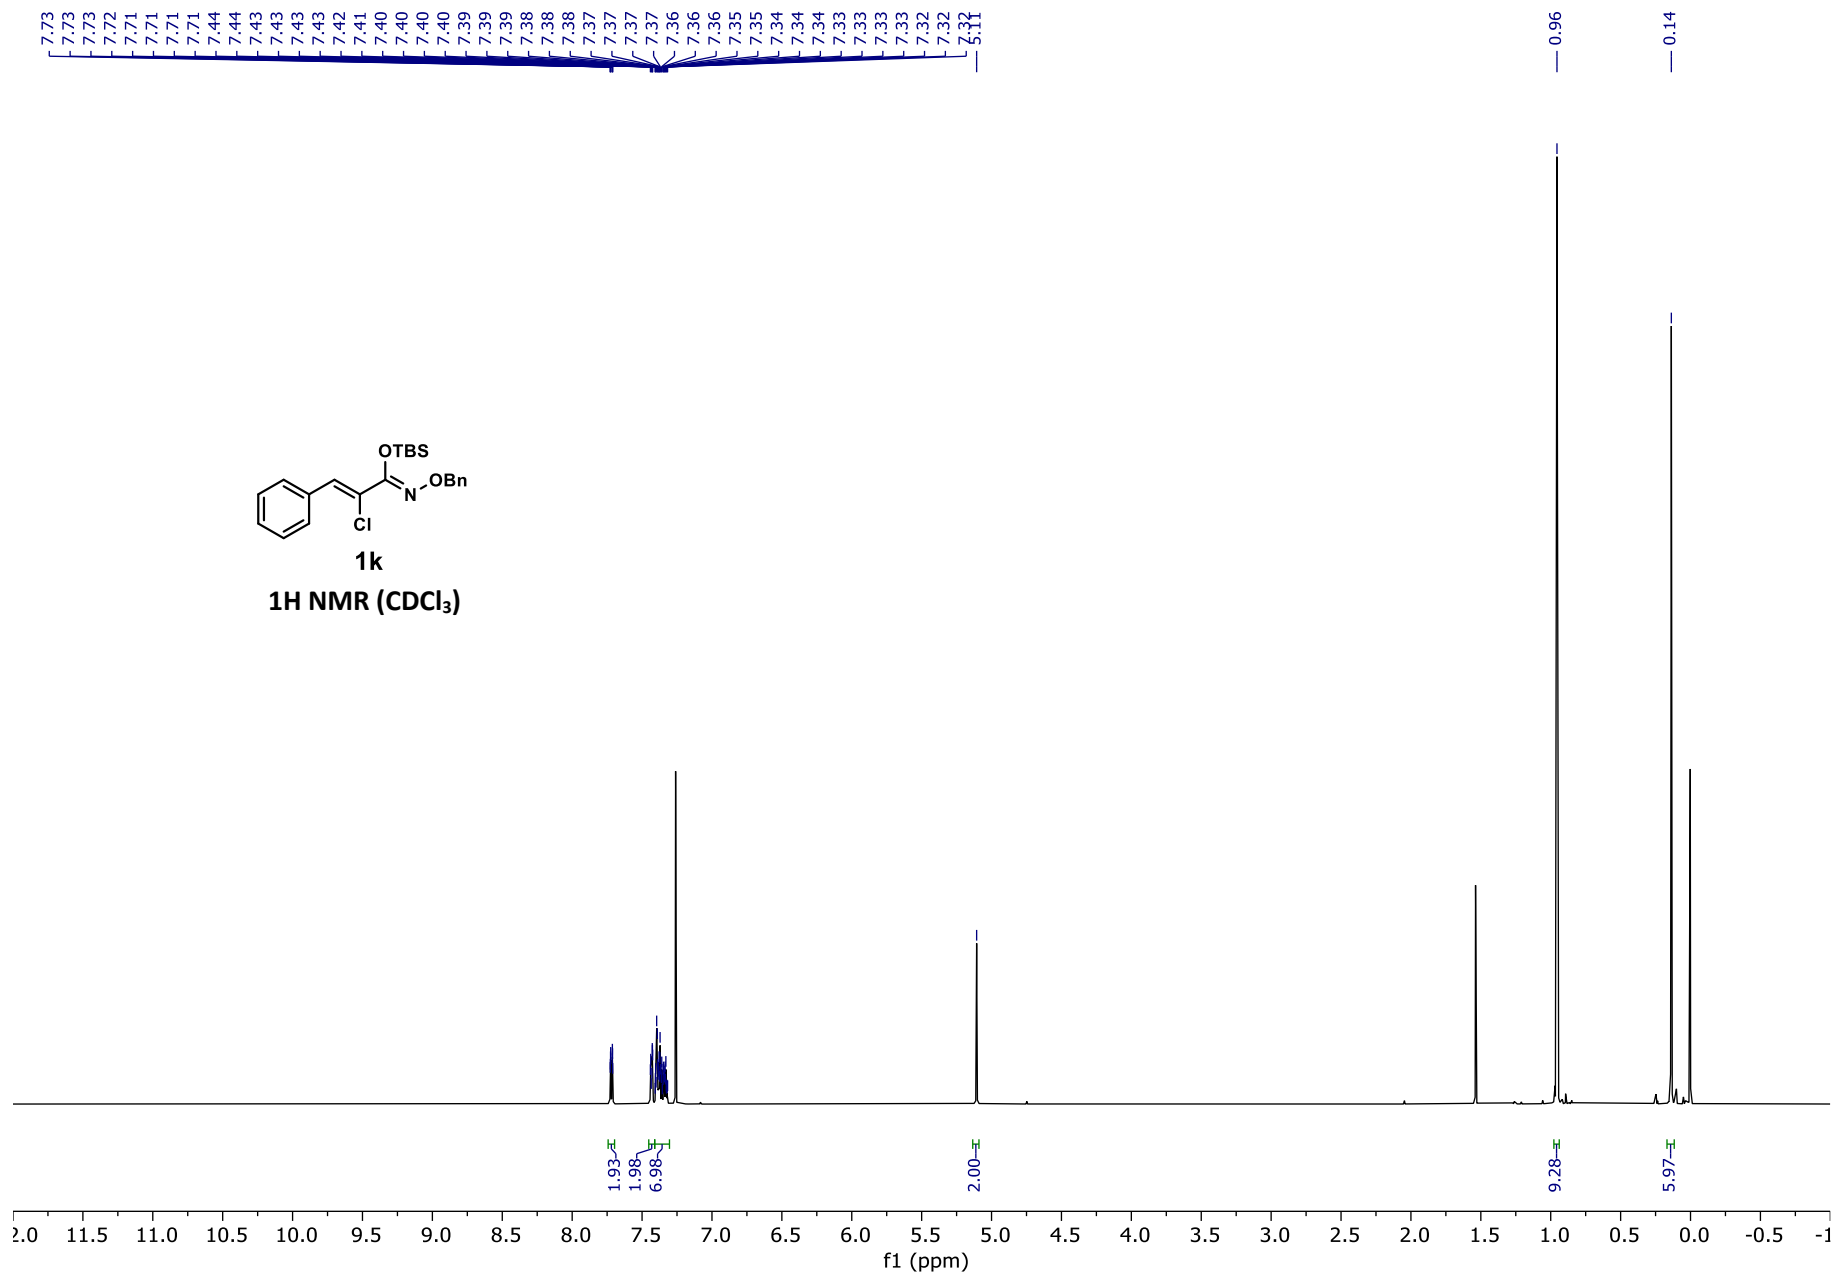

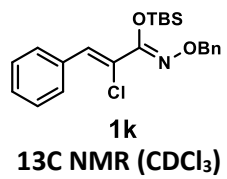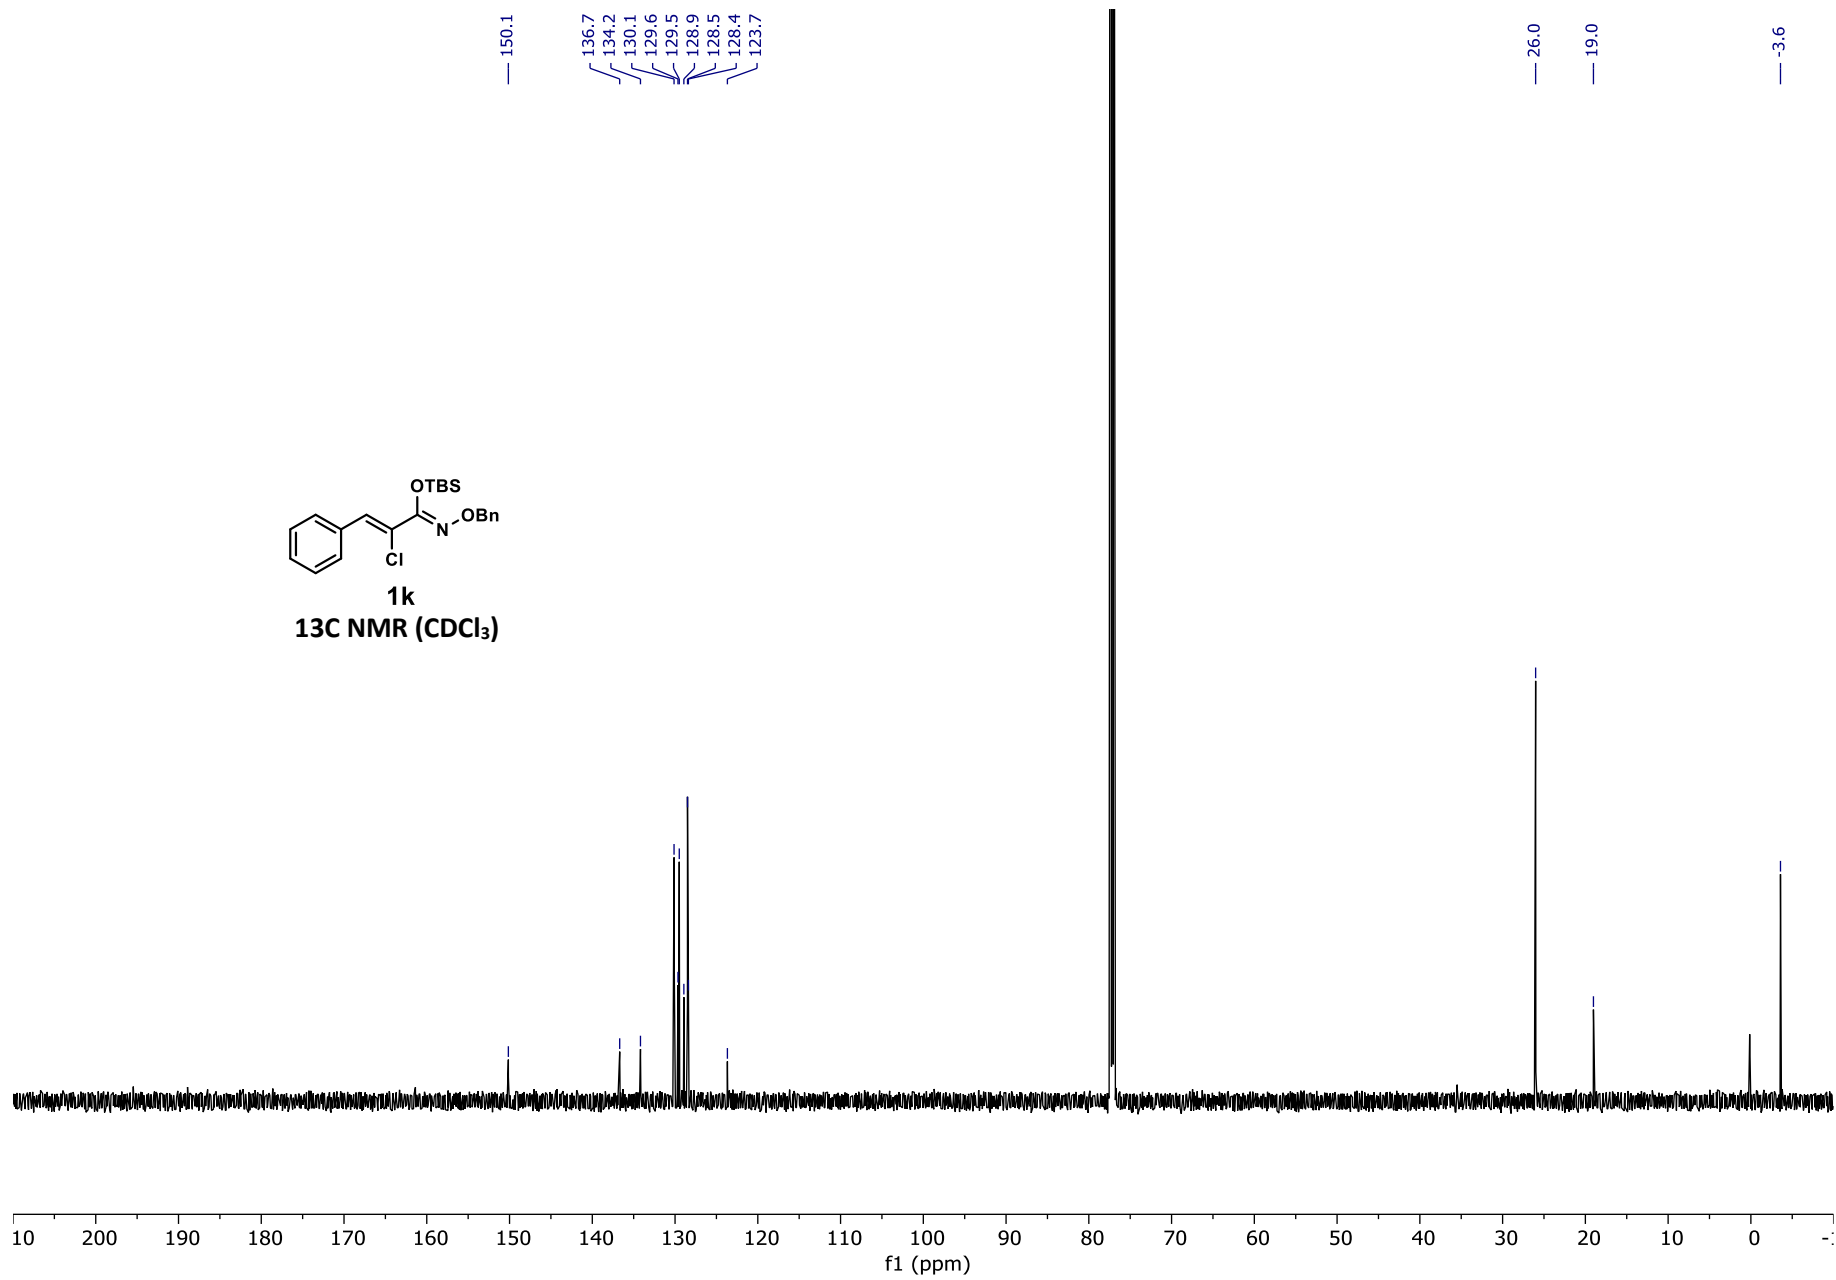



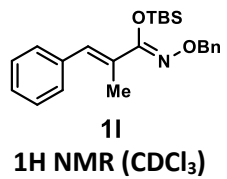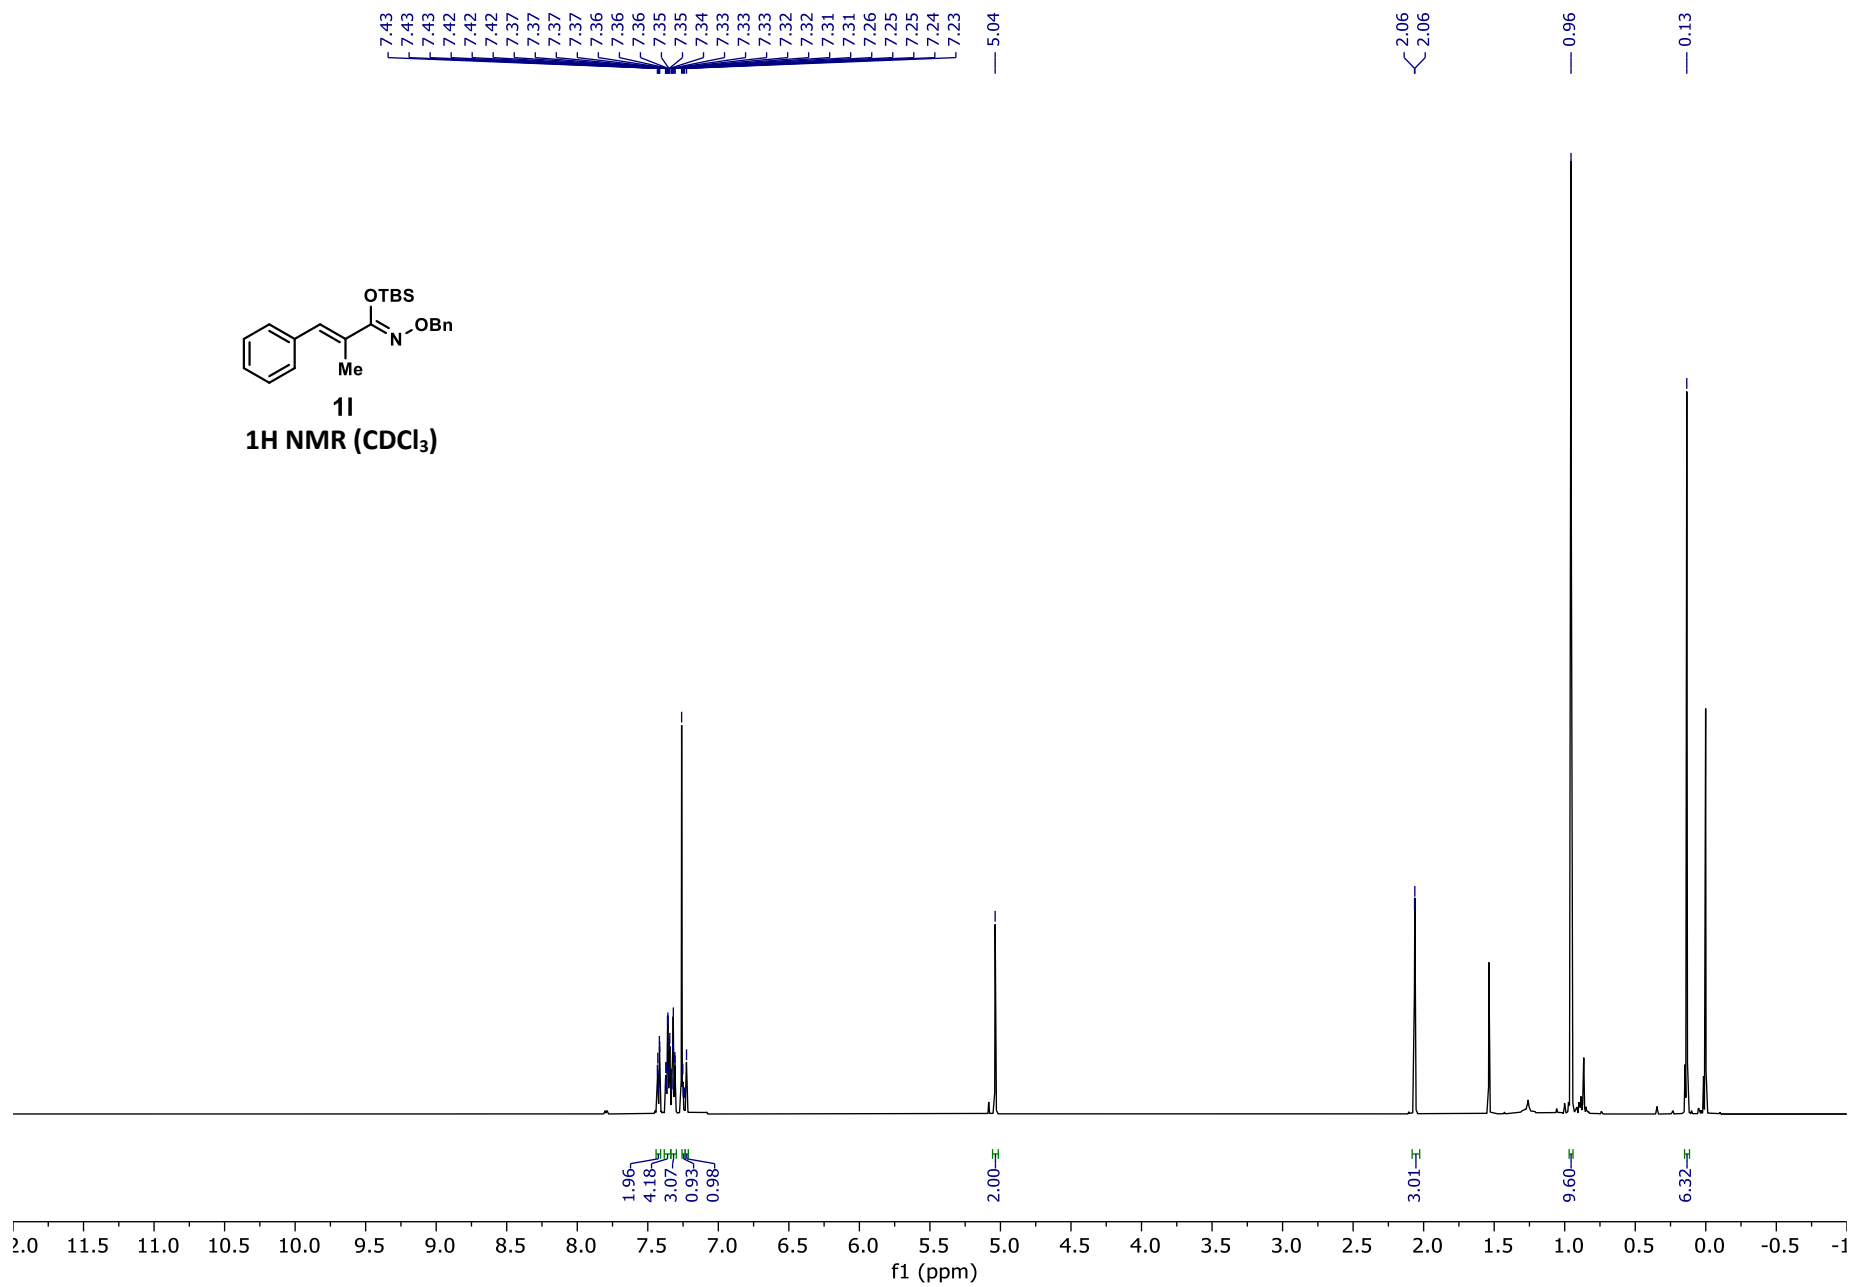

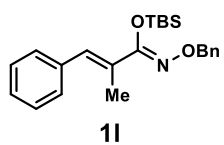

**<sup>13</sup>C NMR (CDCl<sub>3</sub>)**

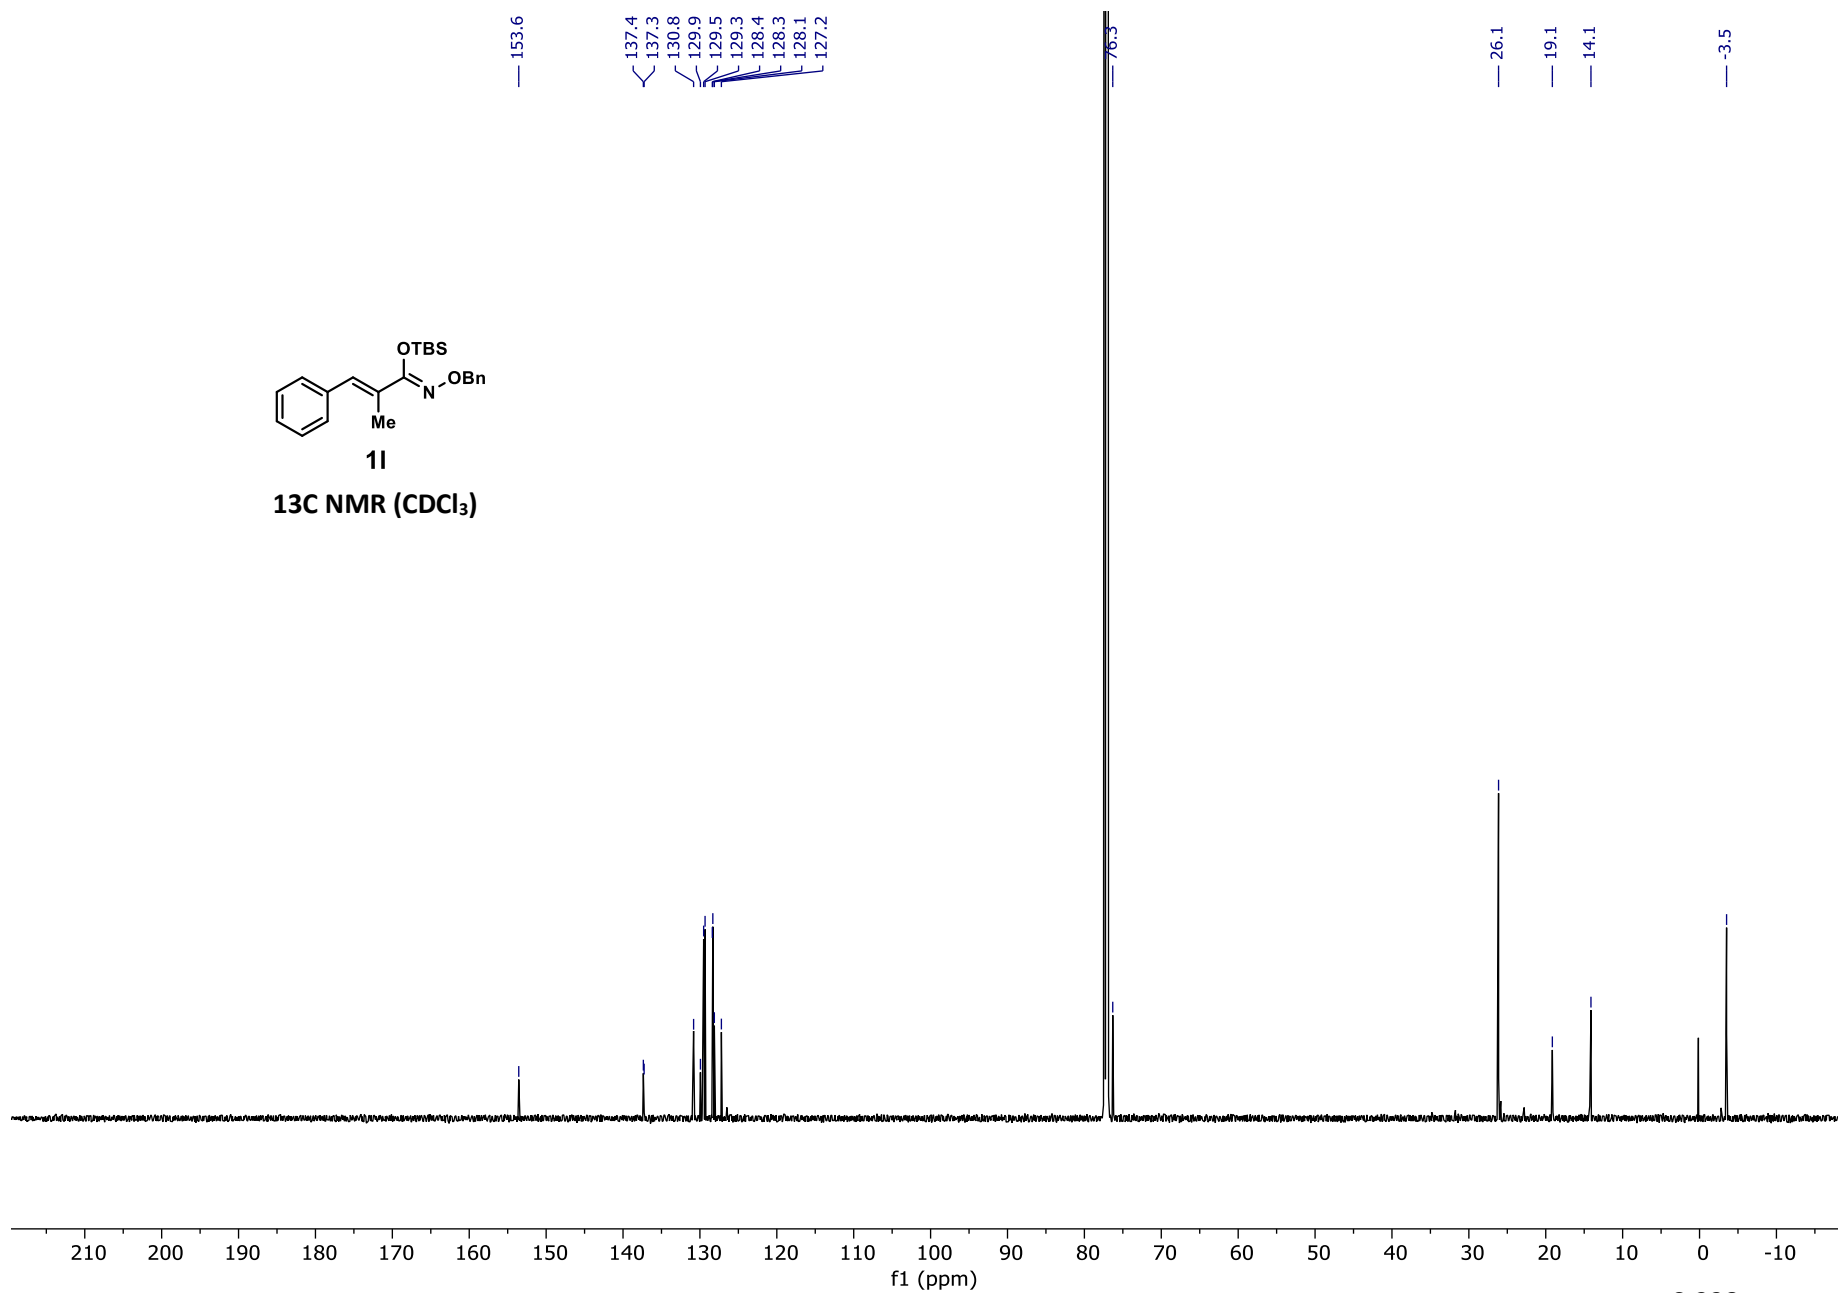

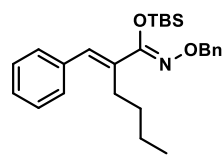

1m

<sup>1</sup>H NMR (CDCl<sub>3</sub>)

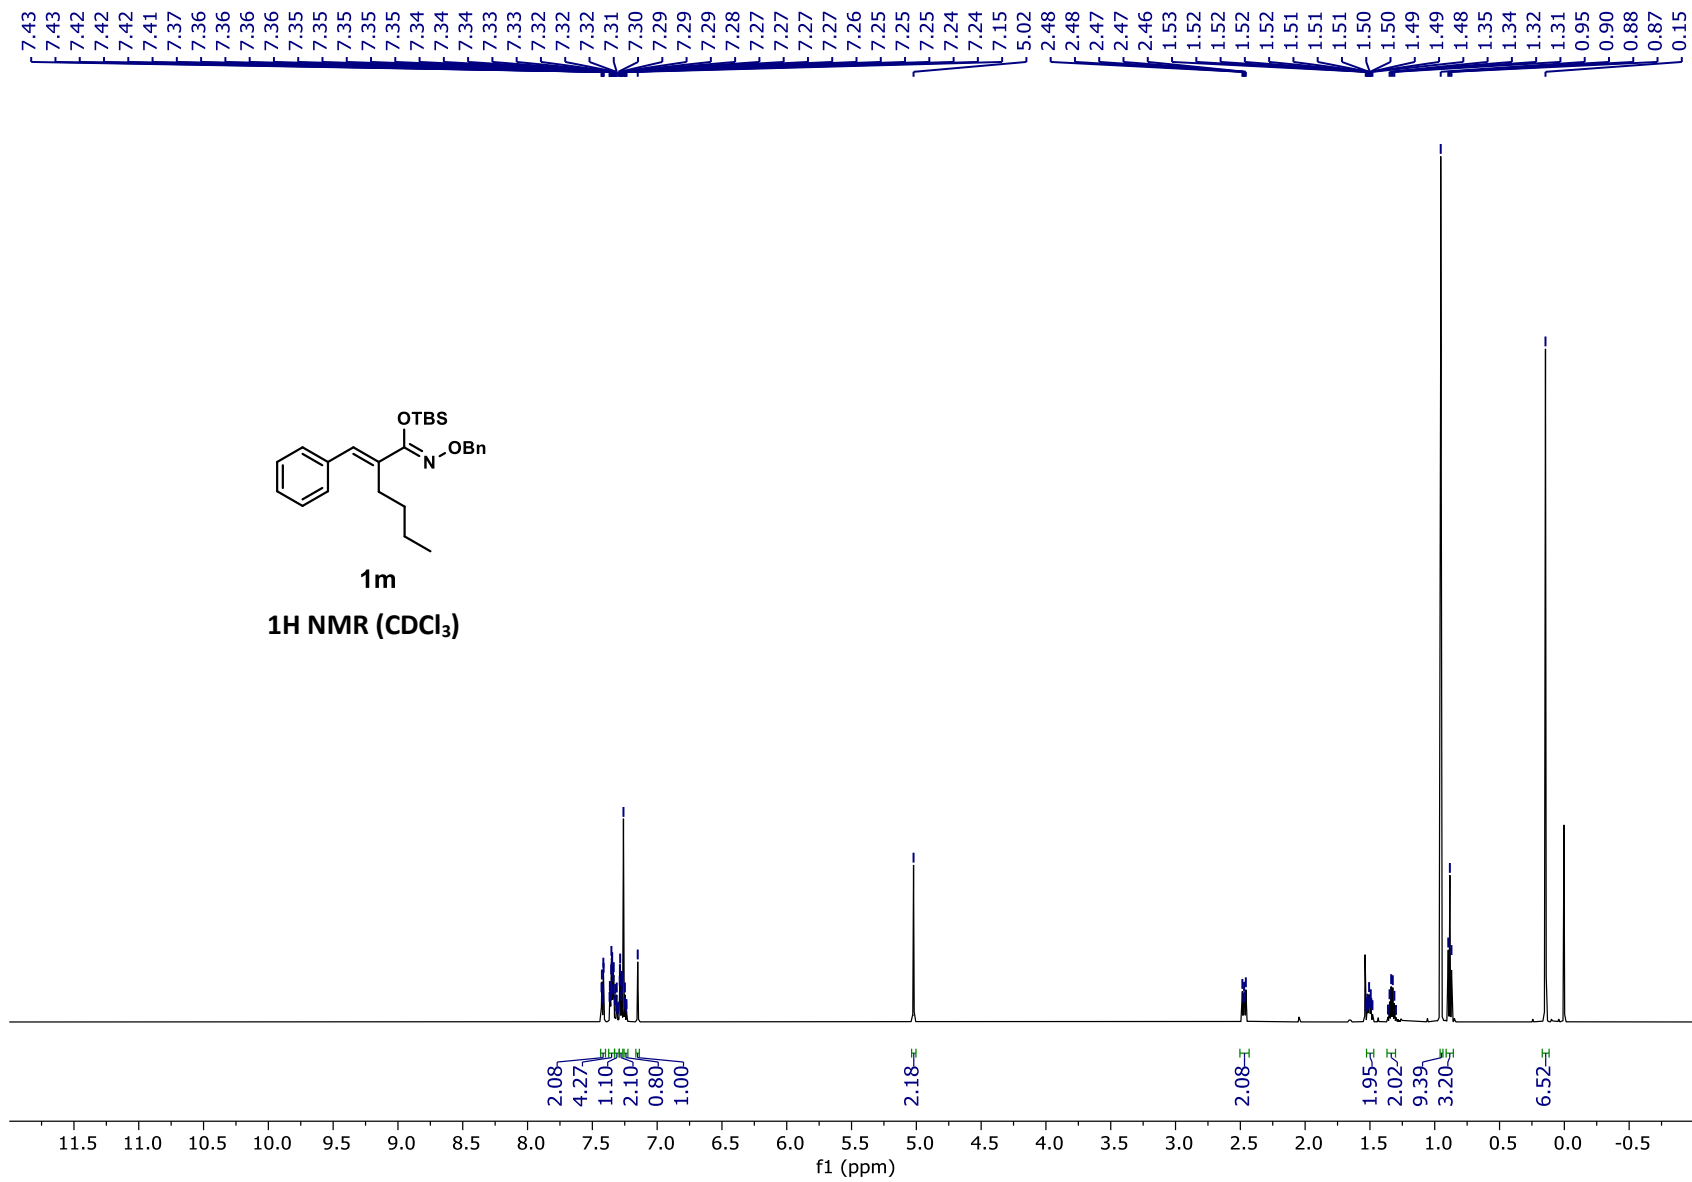

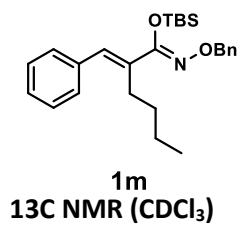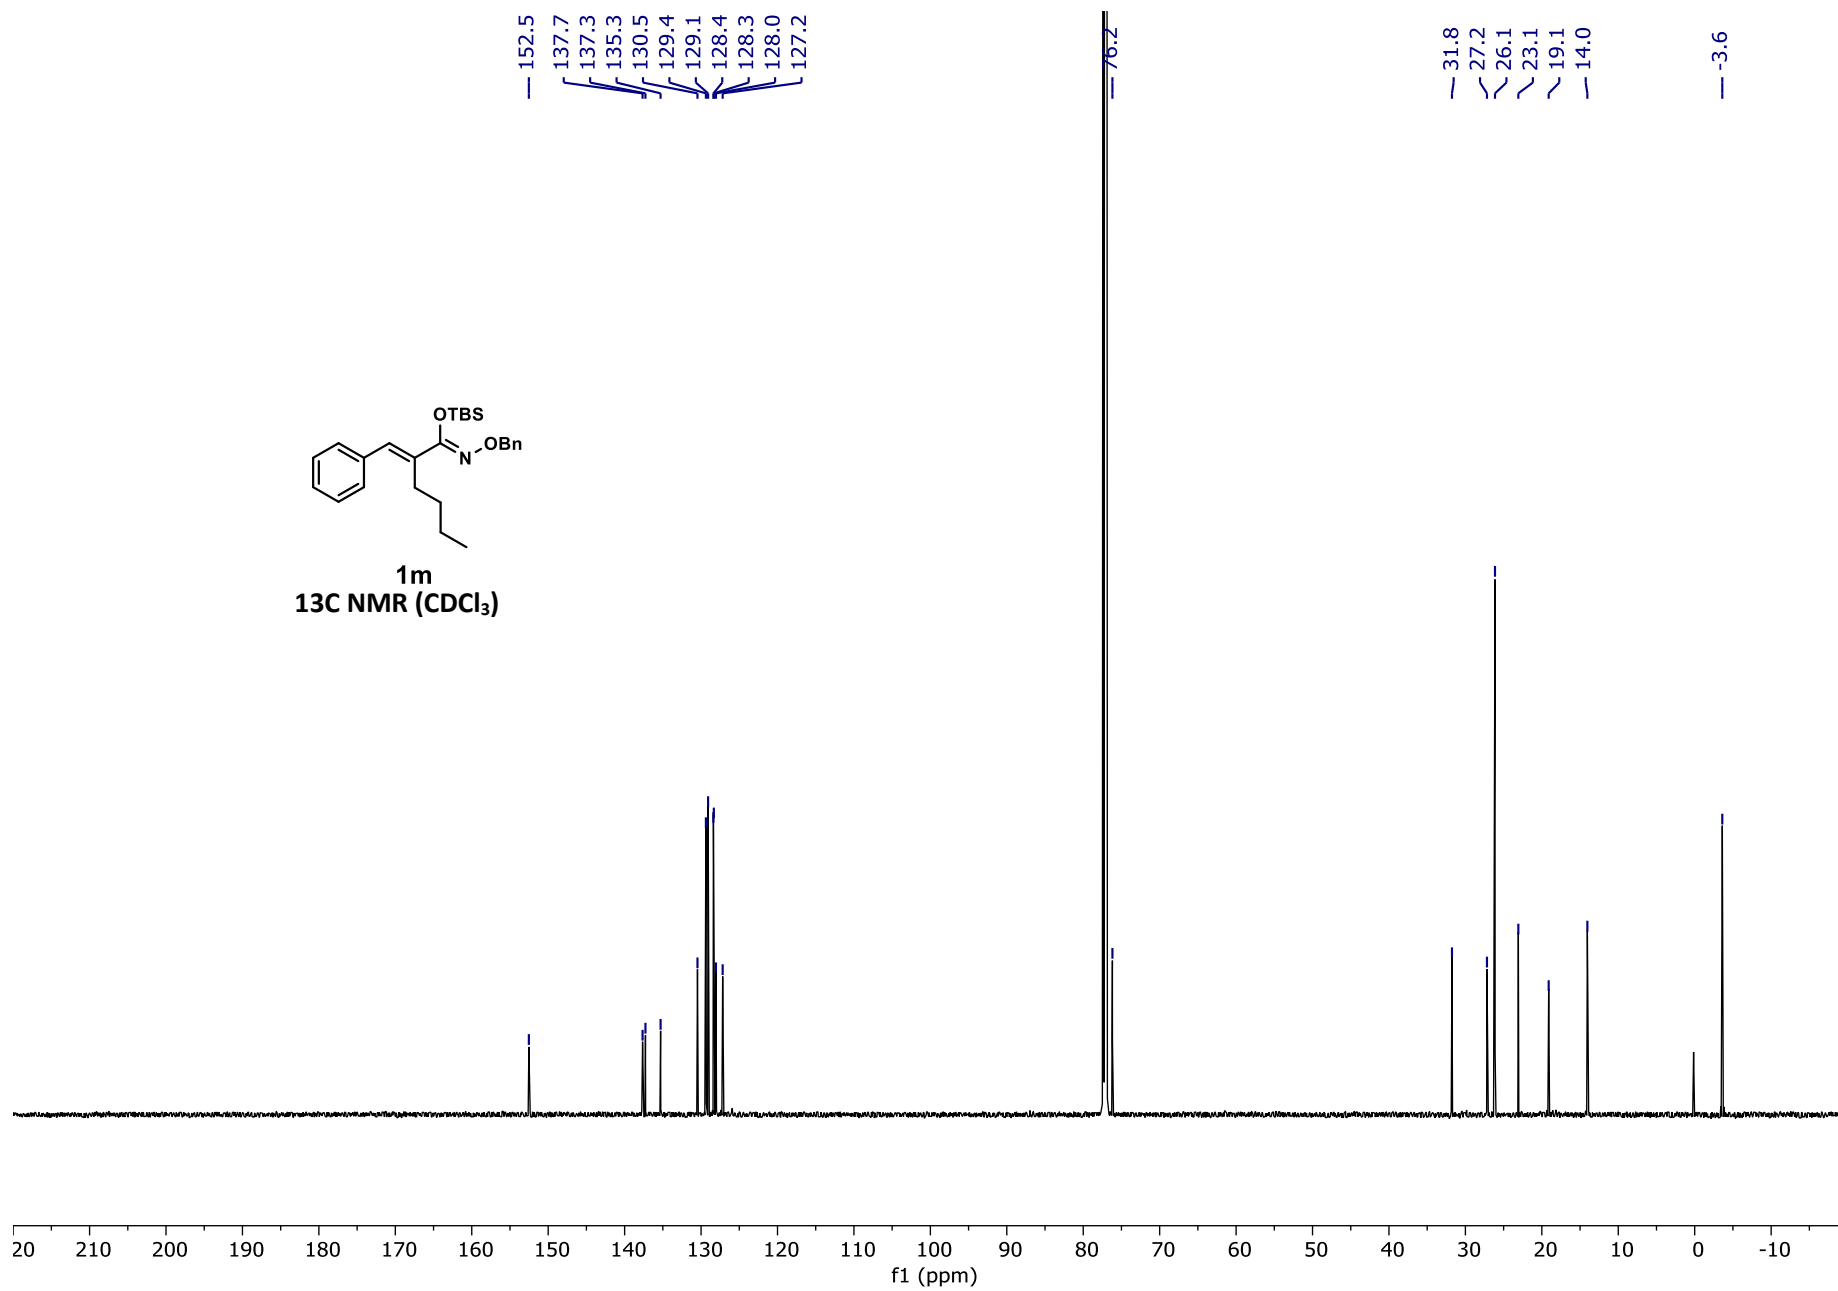

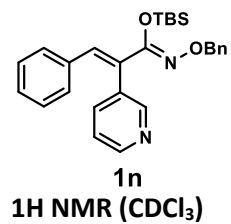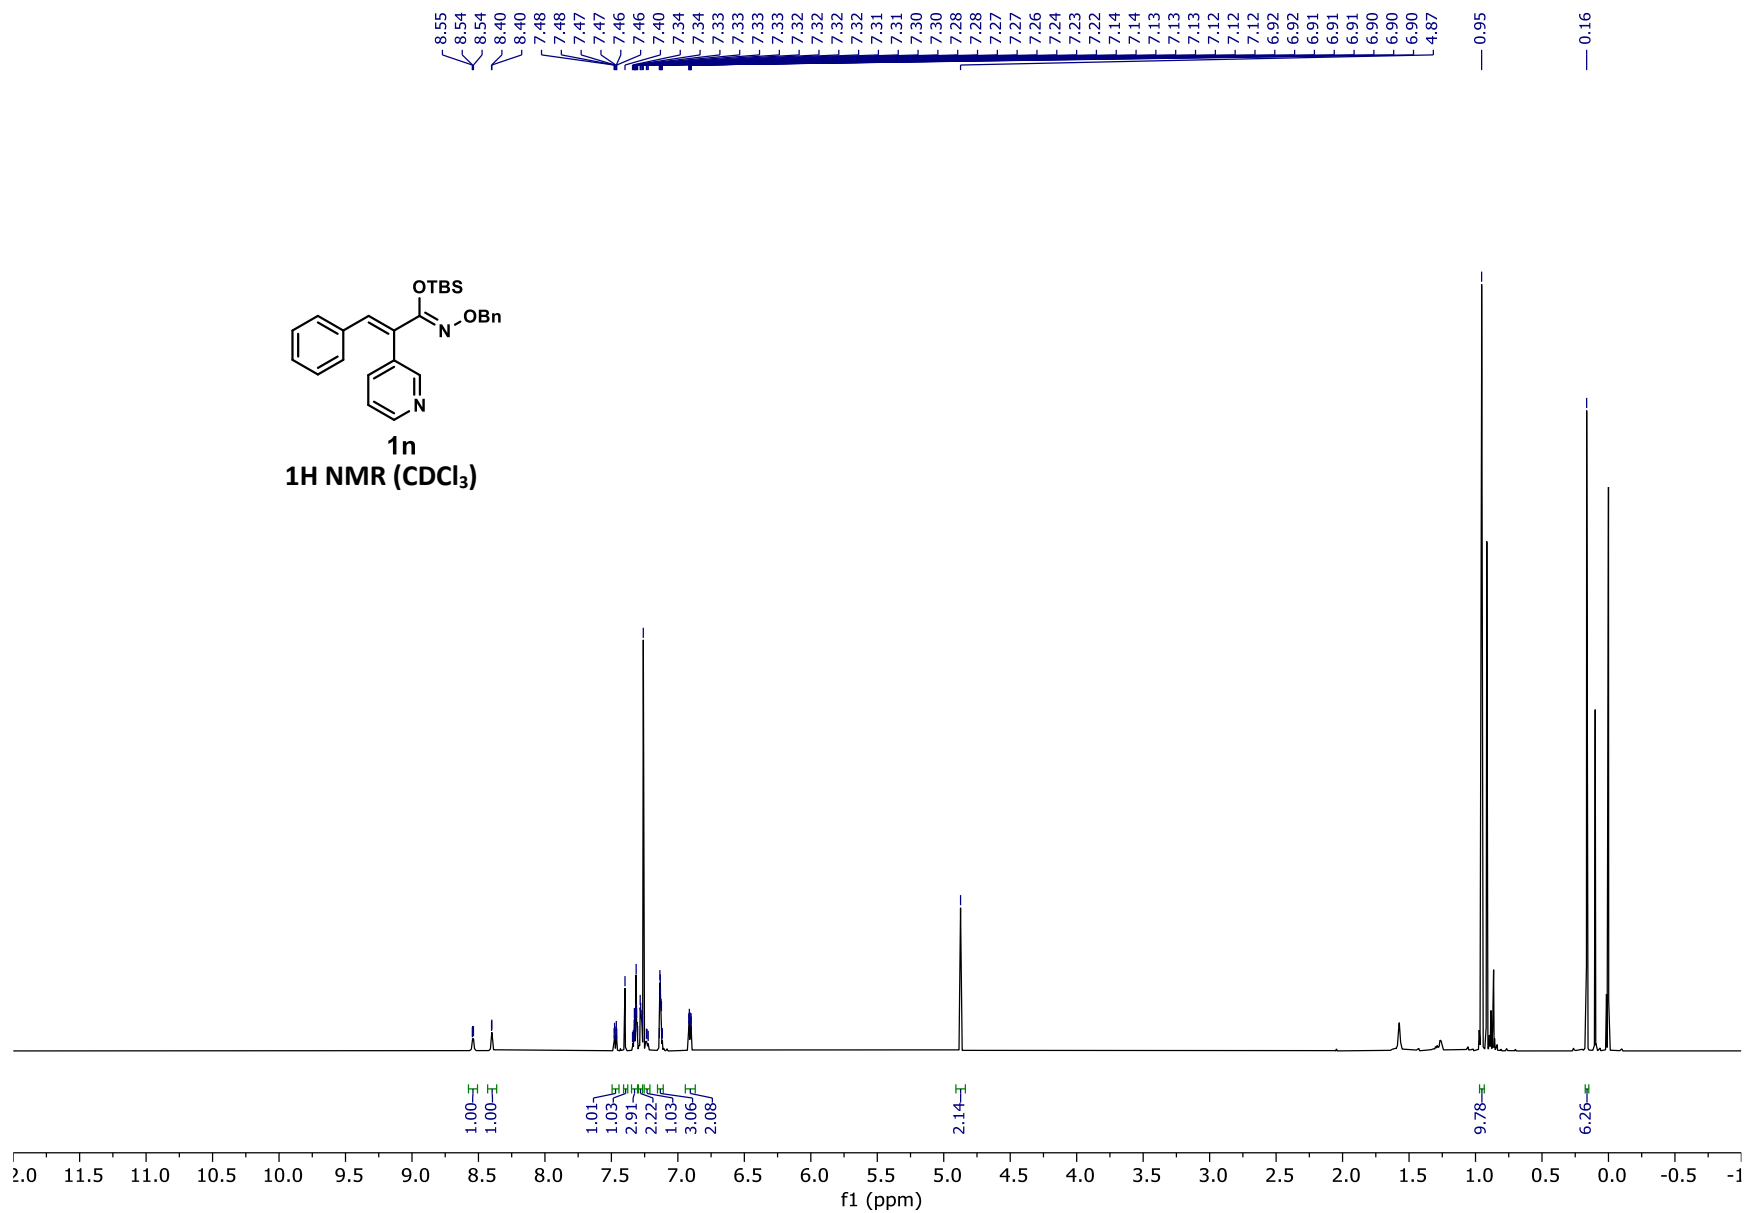

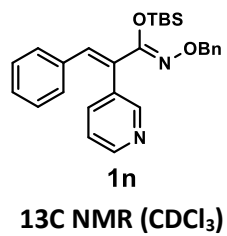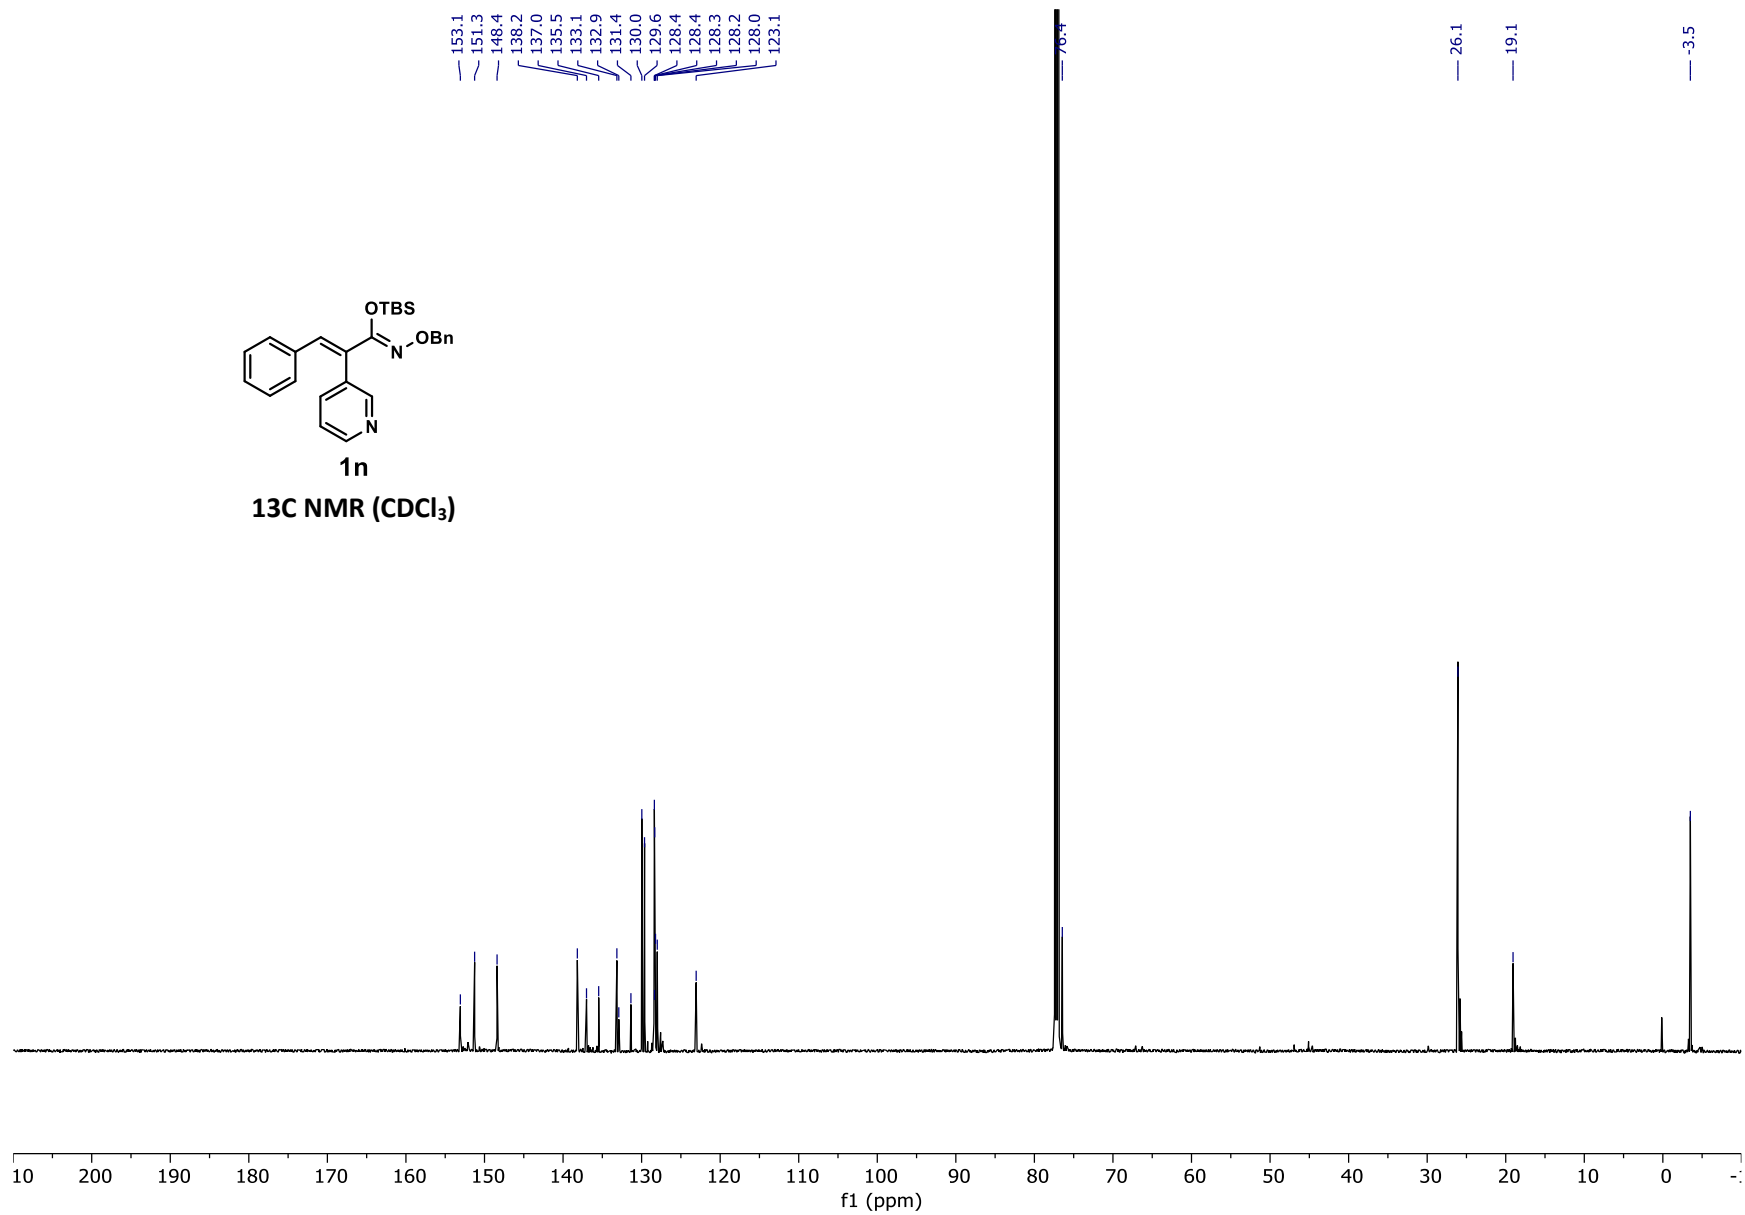

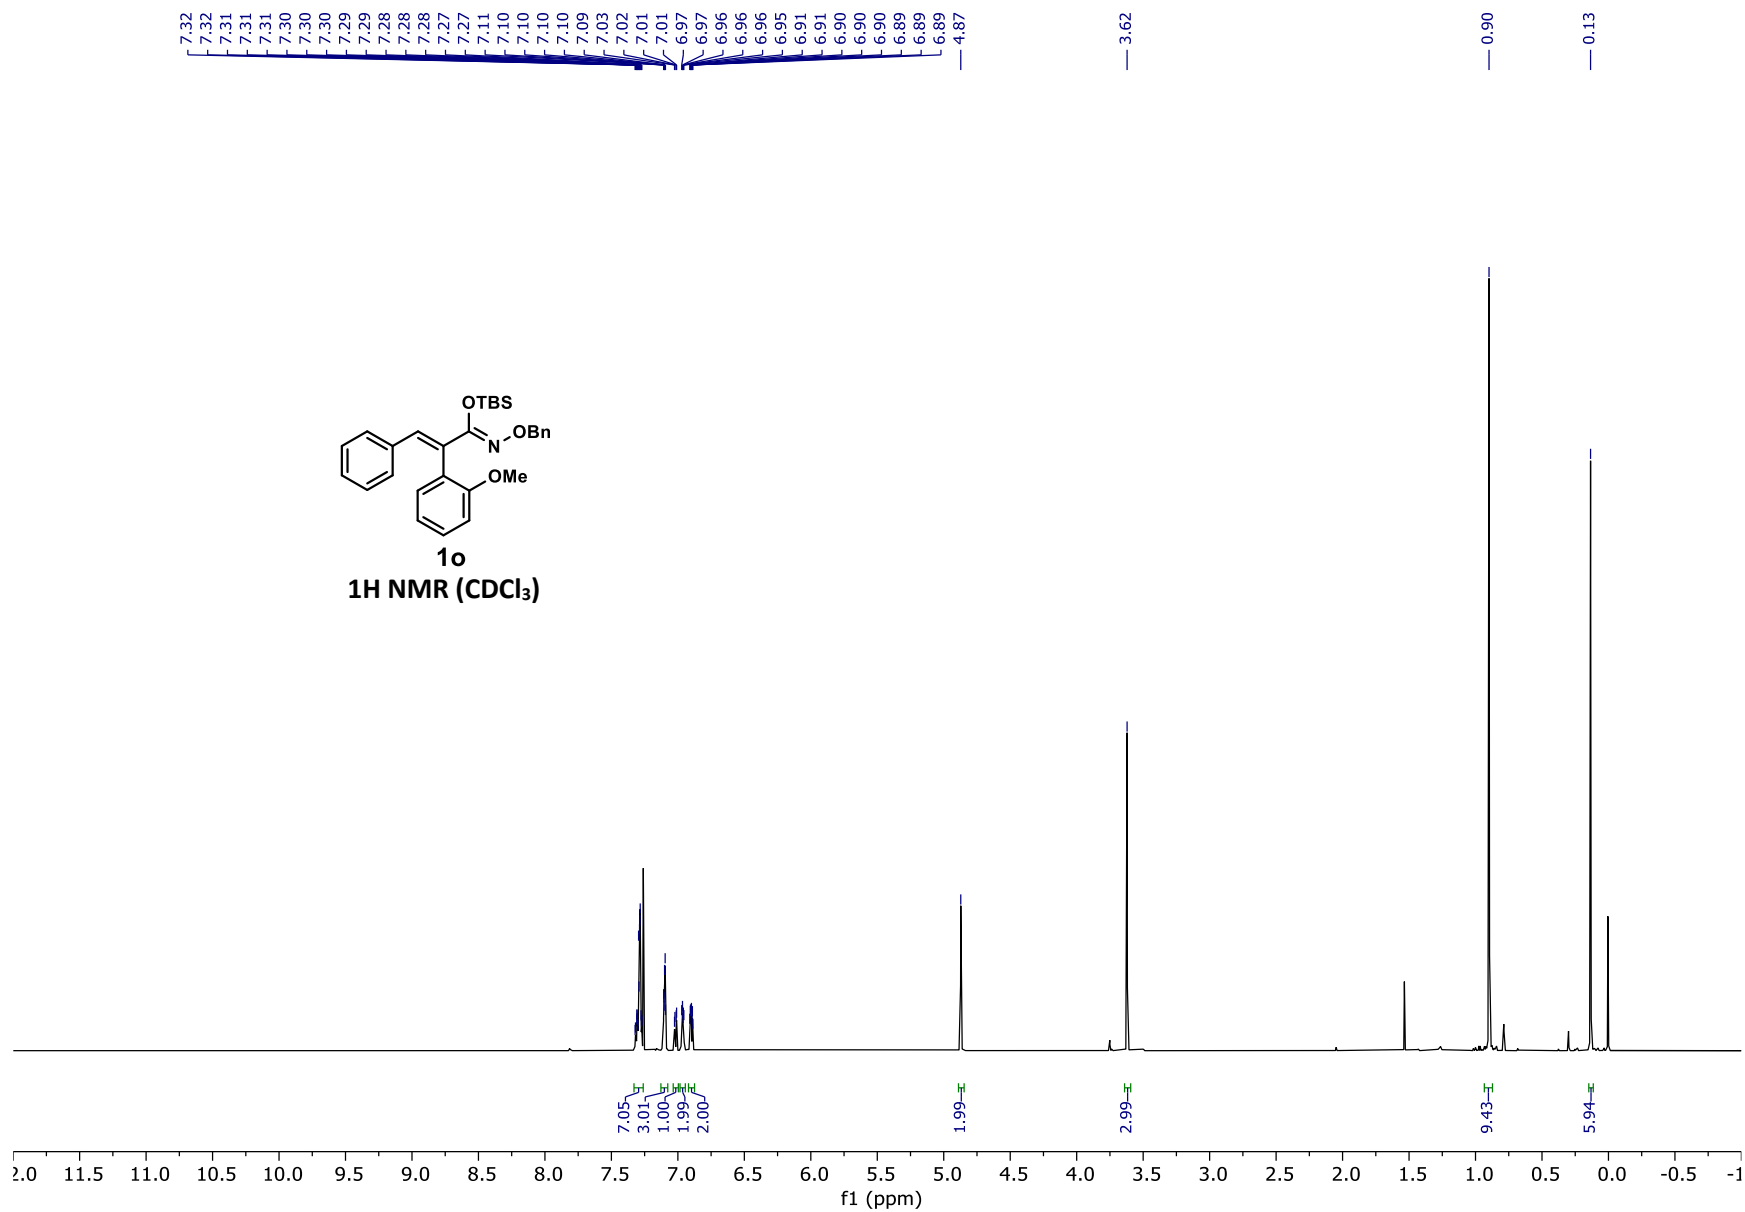

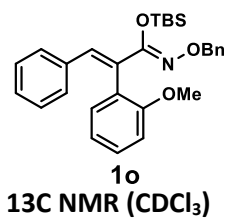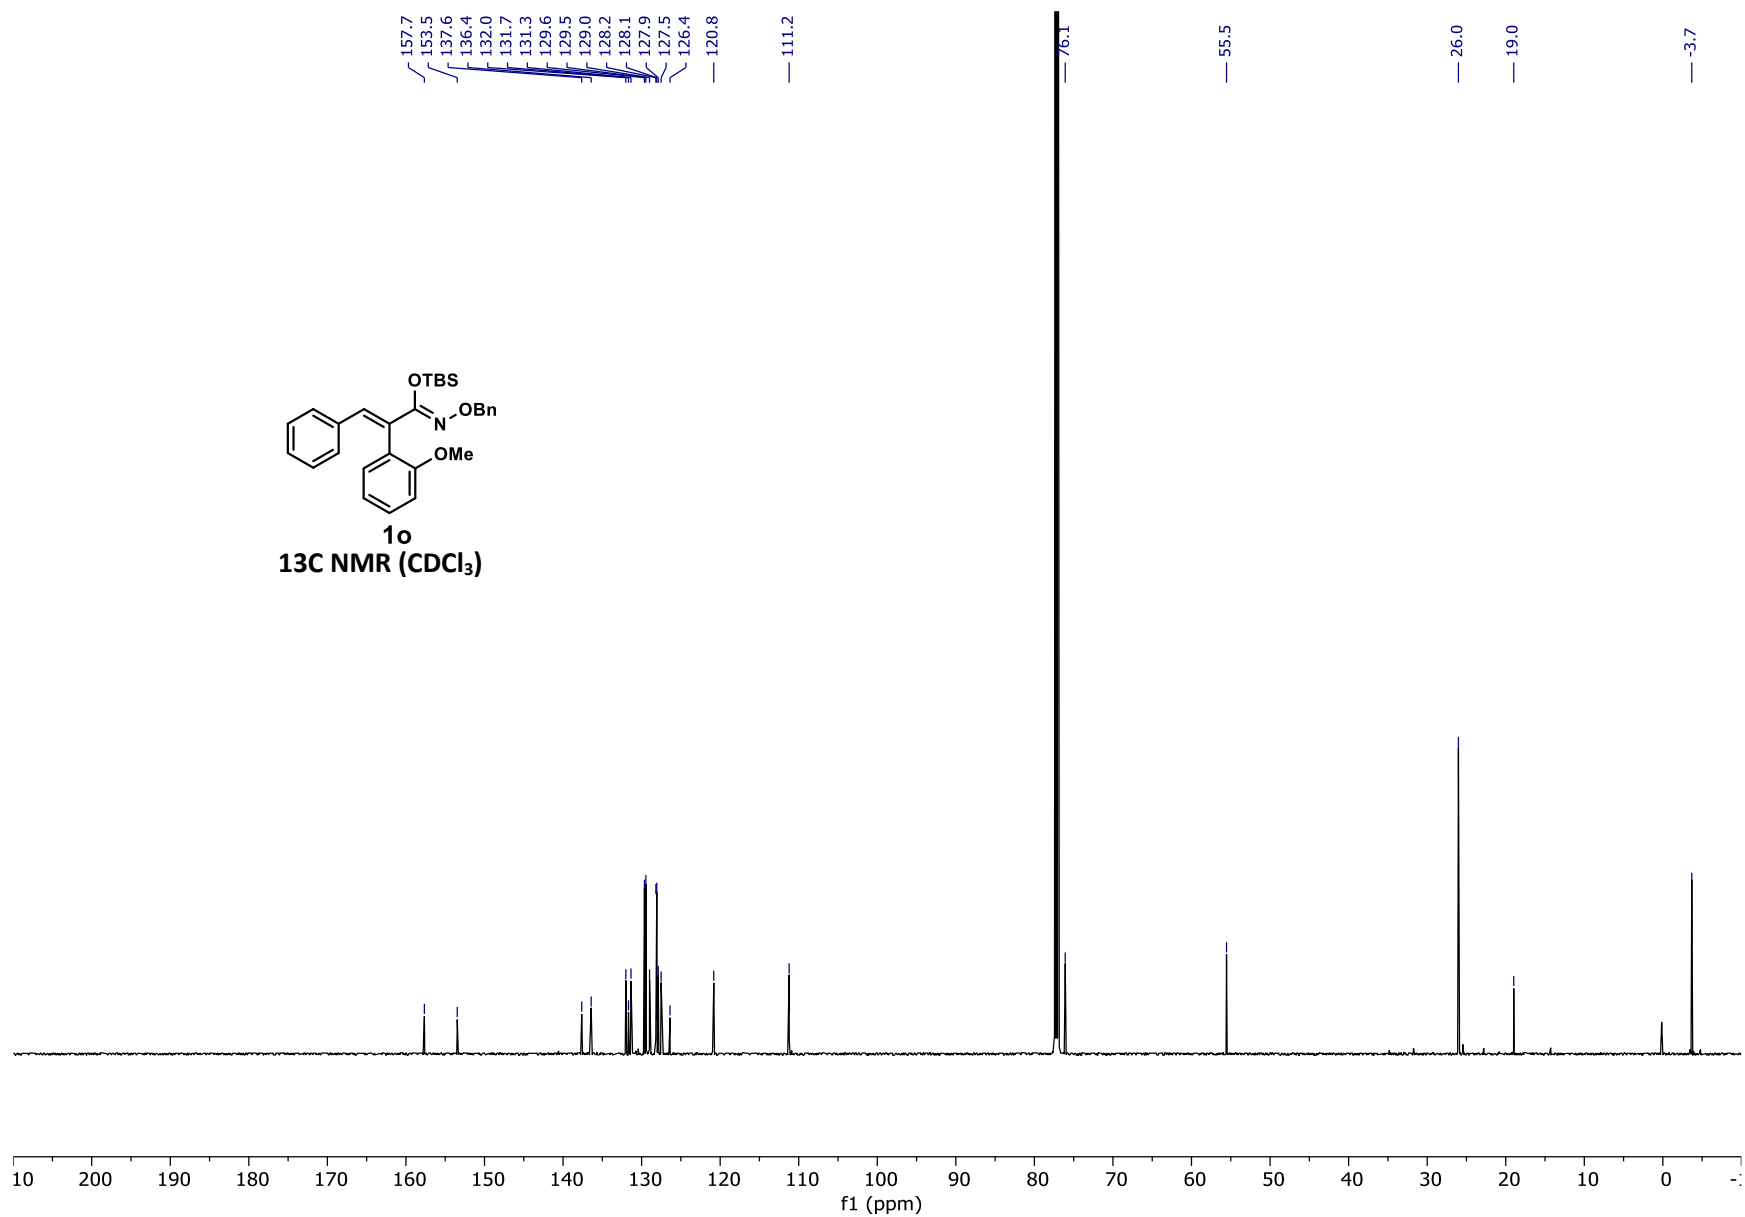



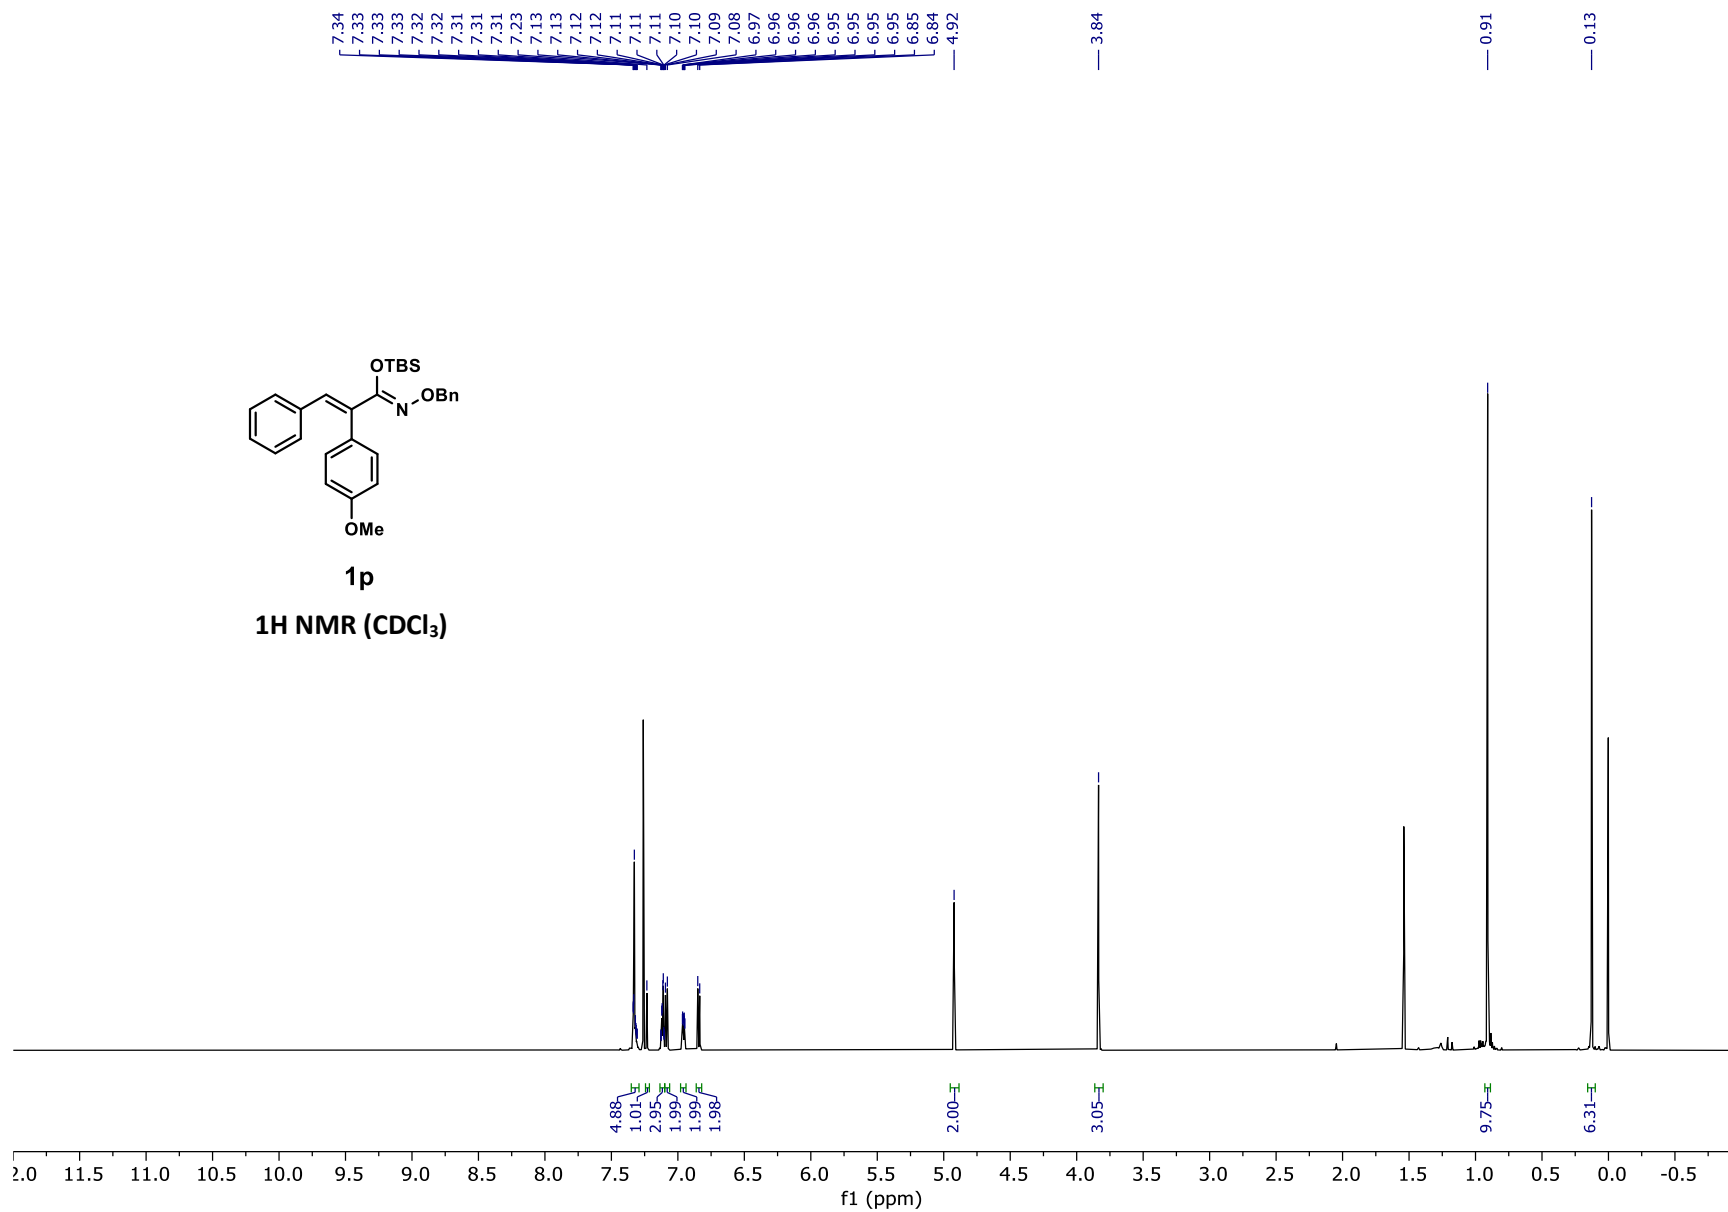

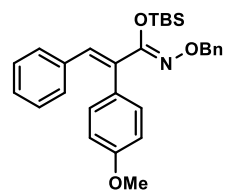

1p

<sup>13</sup>C NMR (CDCl<sub>3</sub>)

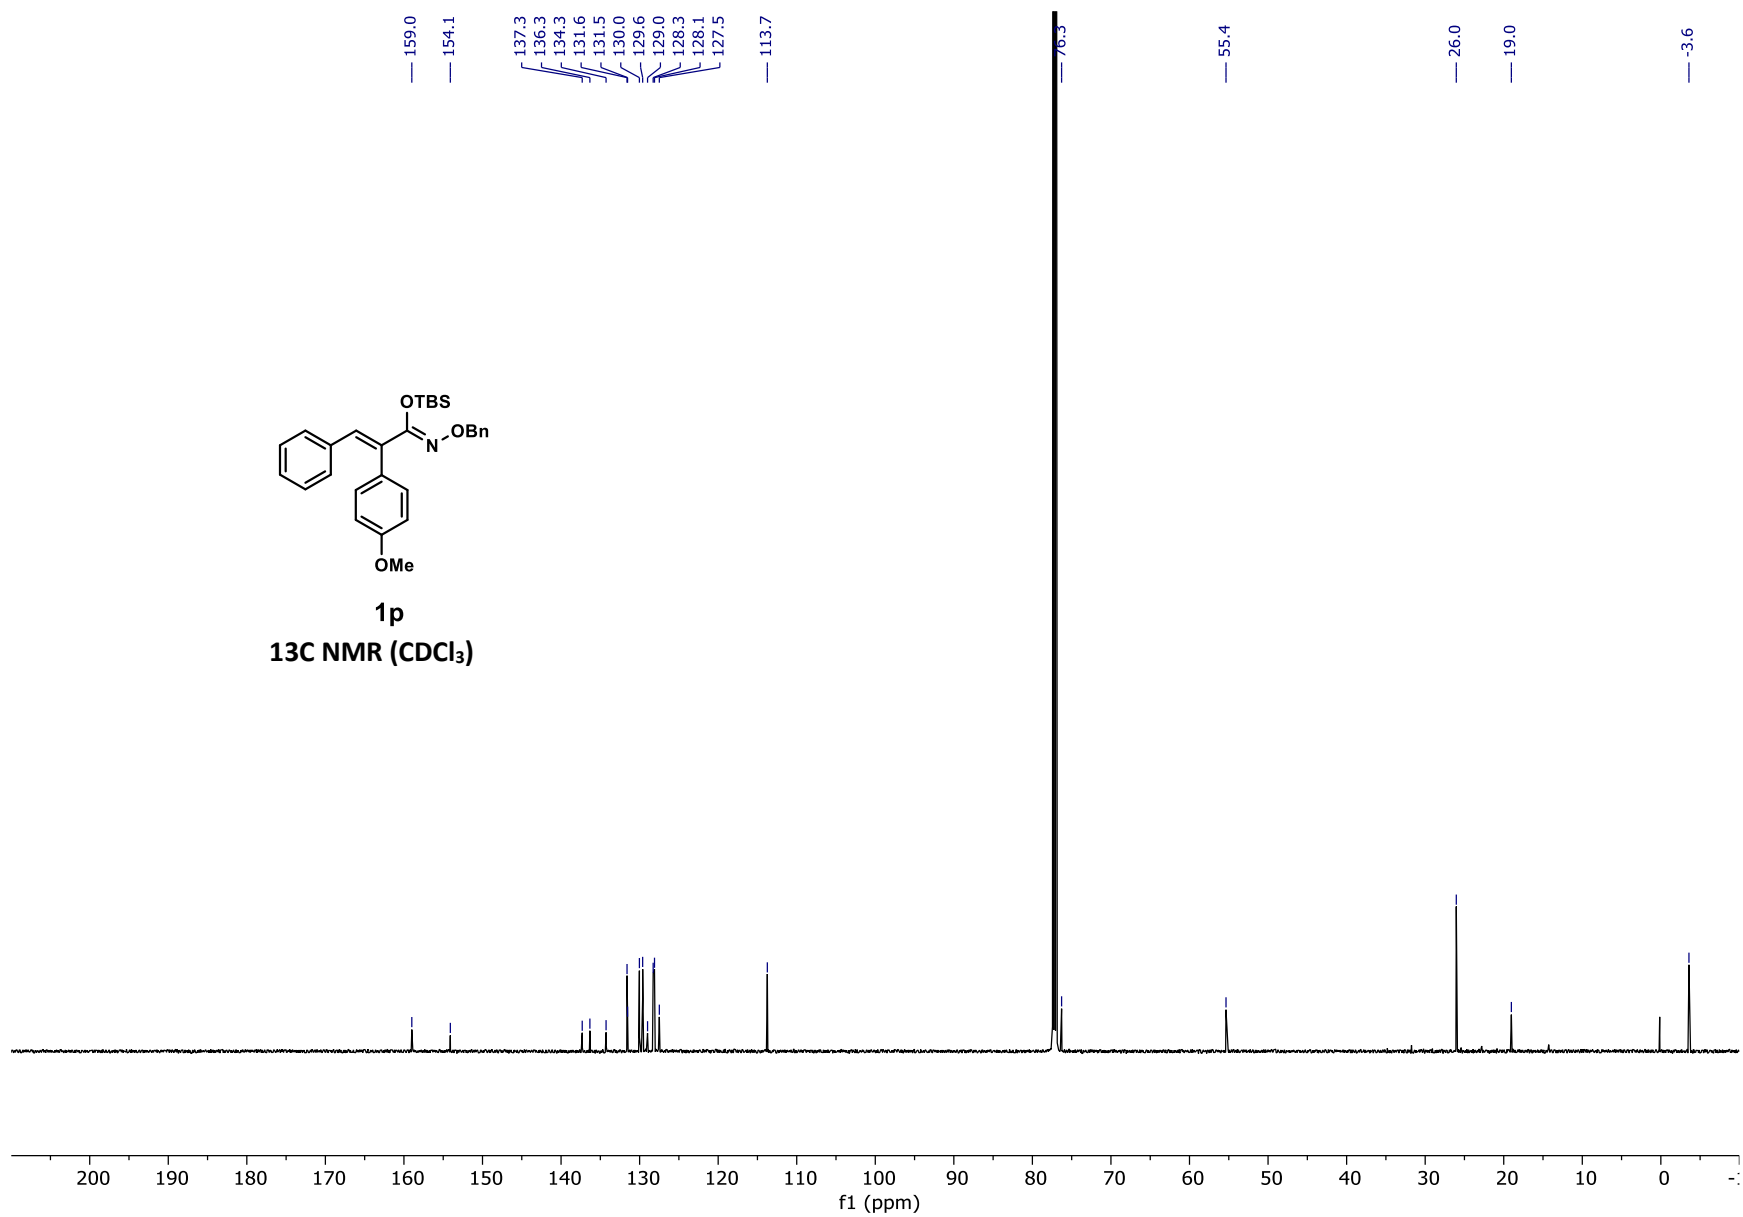

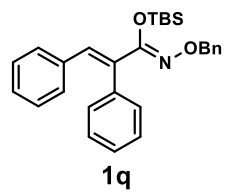

**<sup>1</sup>H NMR (CDCl<sub>3</sub>)**

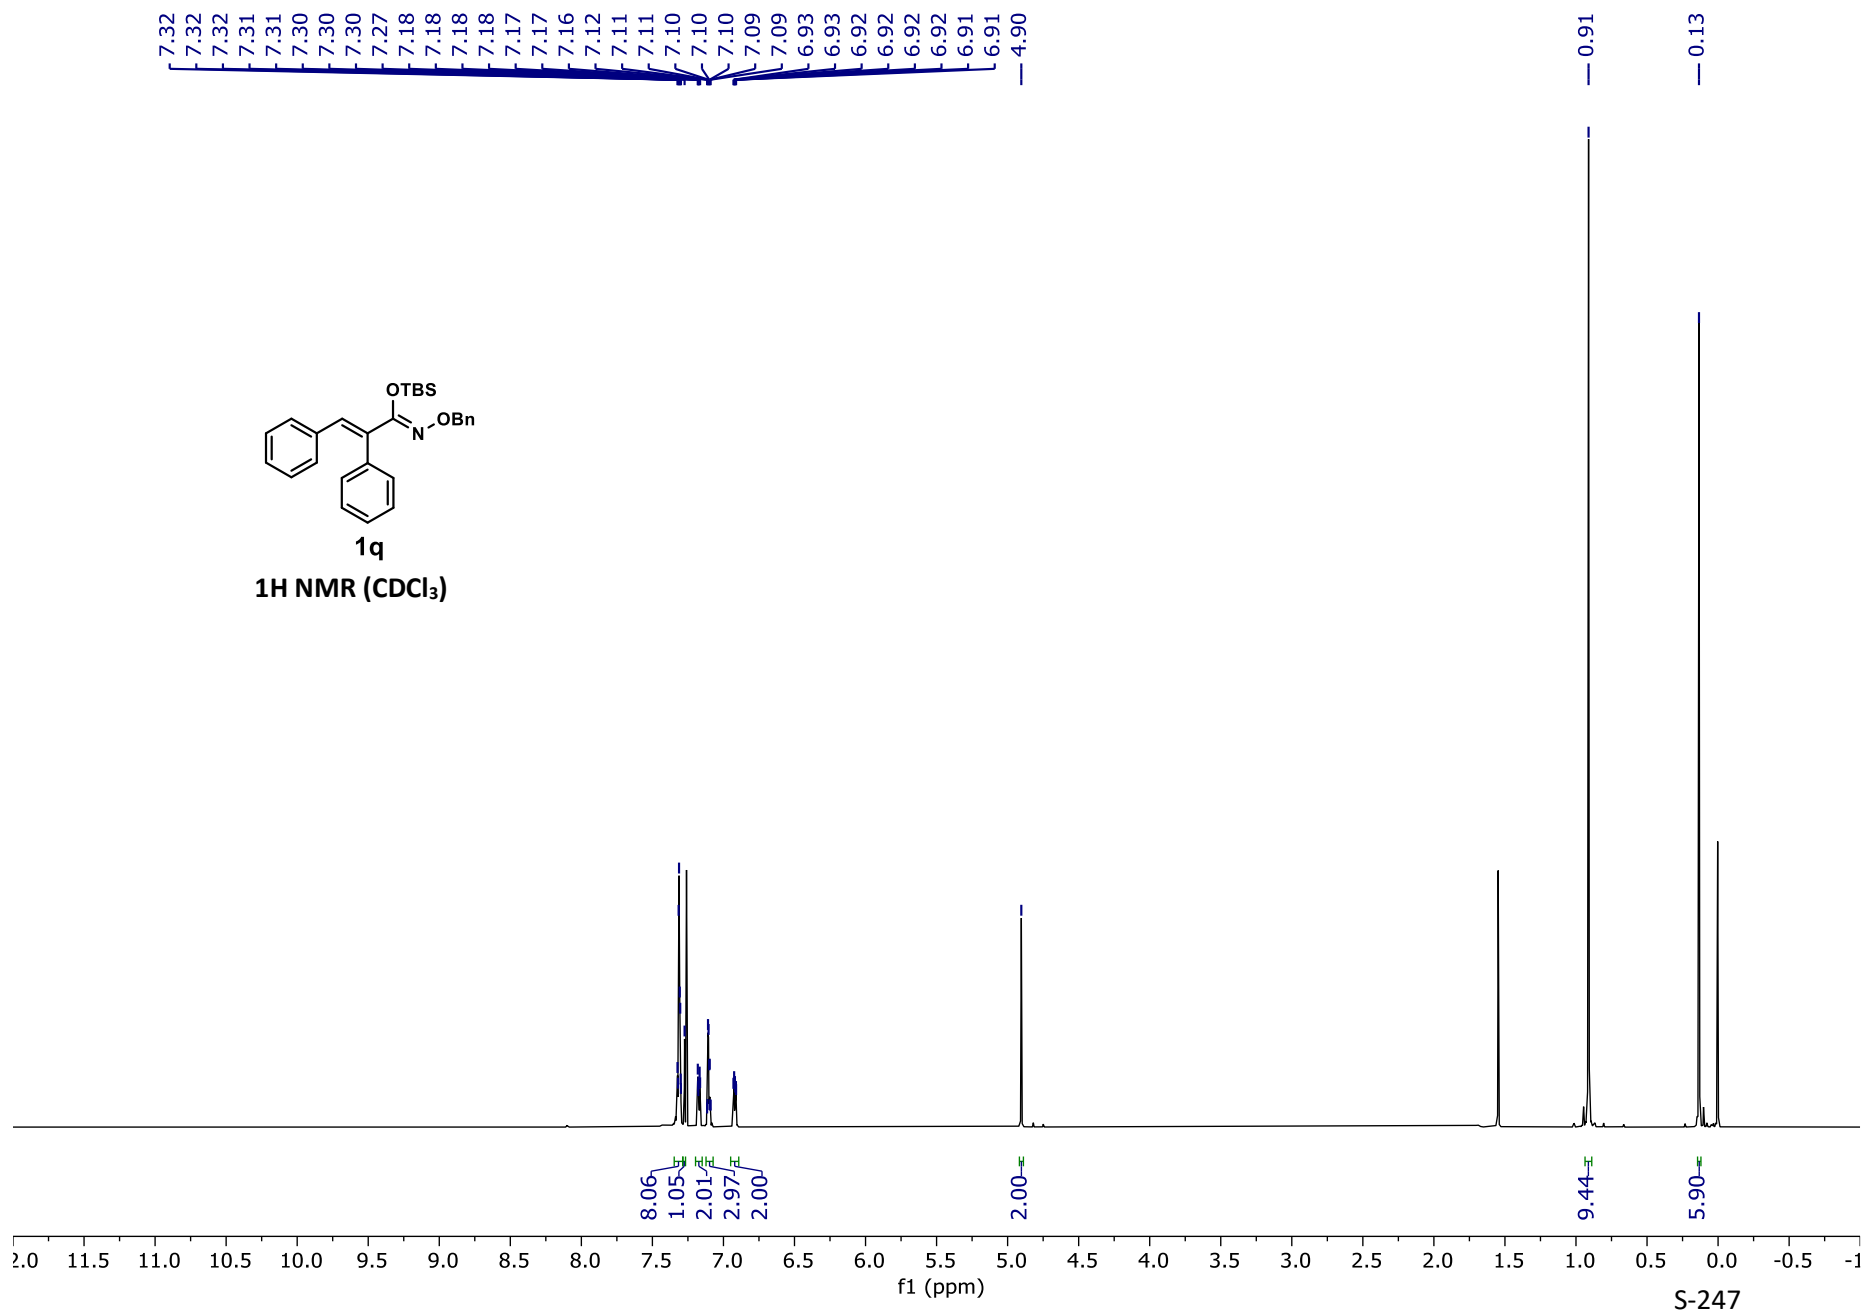

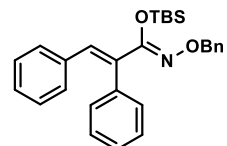

1q

<sup>13</sup>C NMR (CDCl<sub>3</sub>)

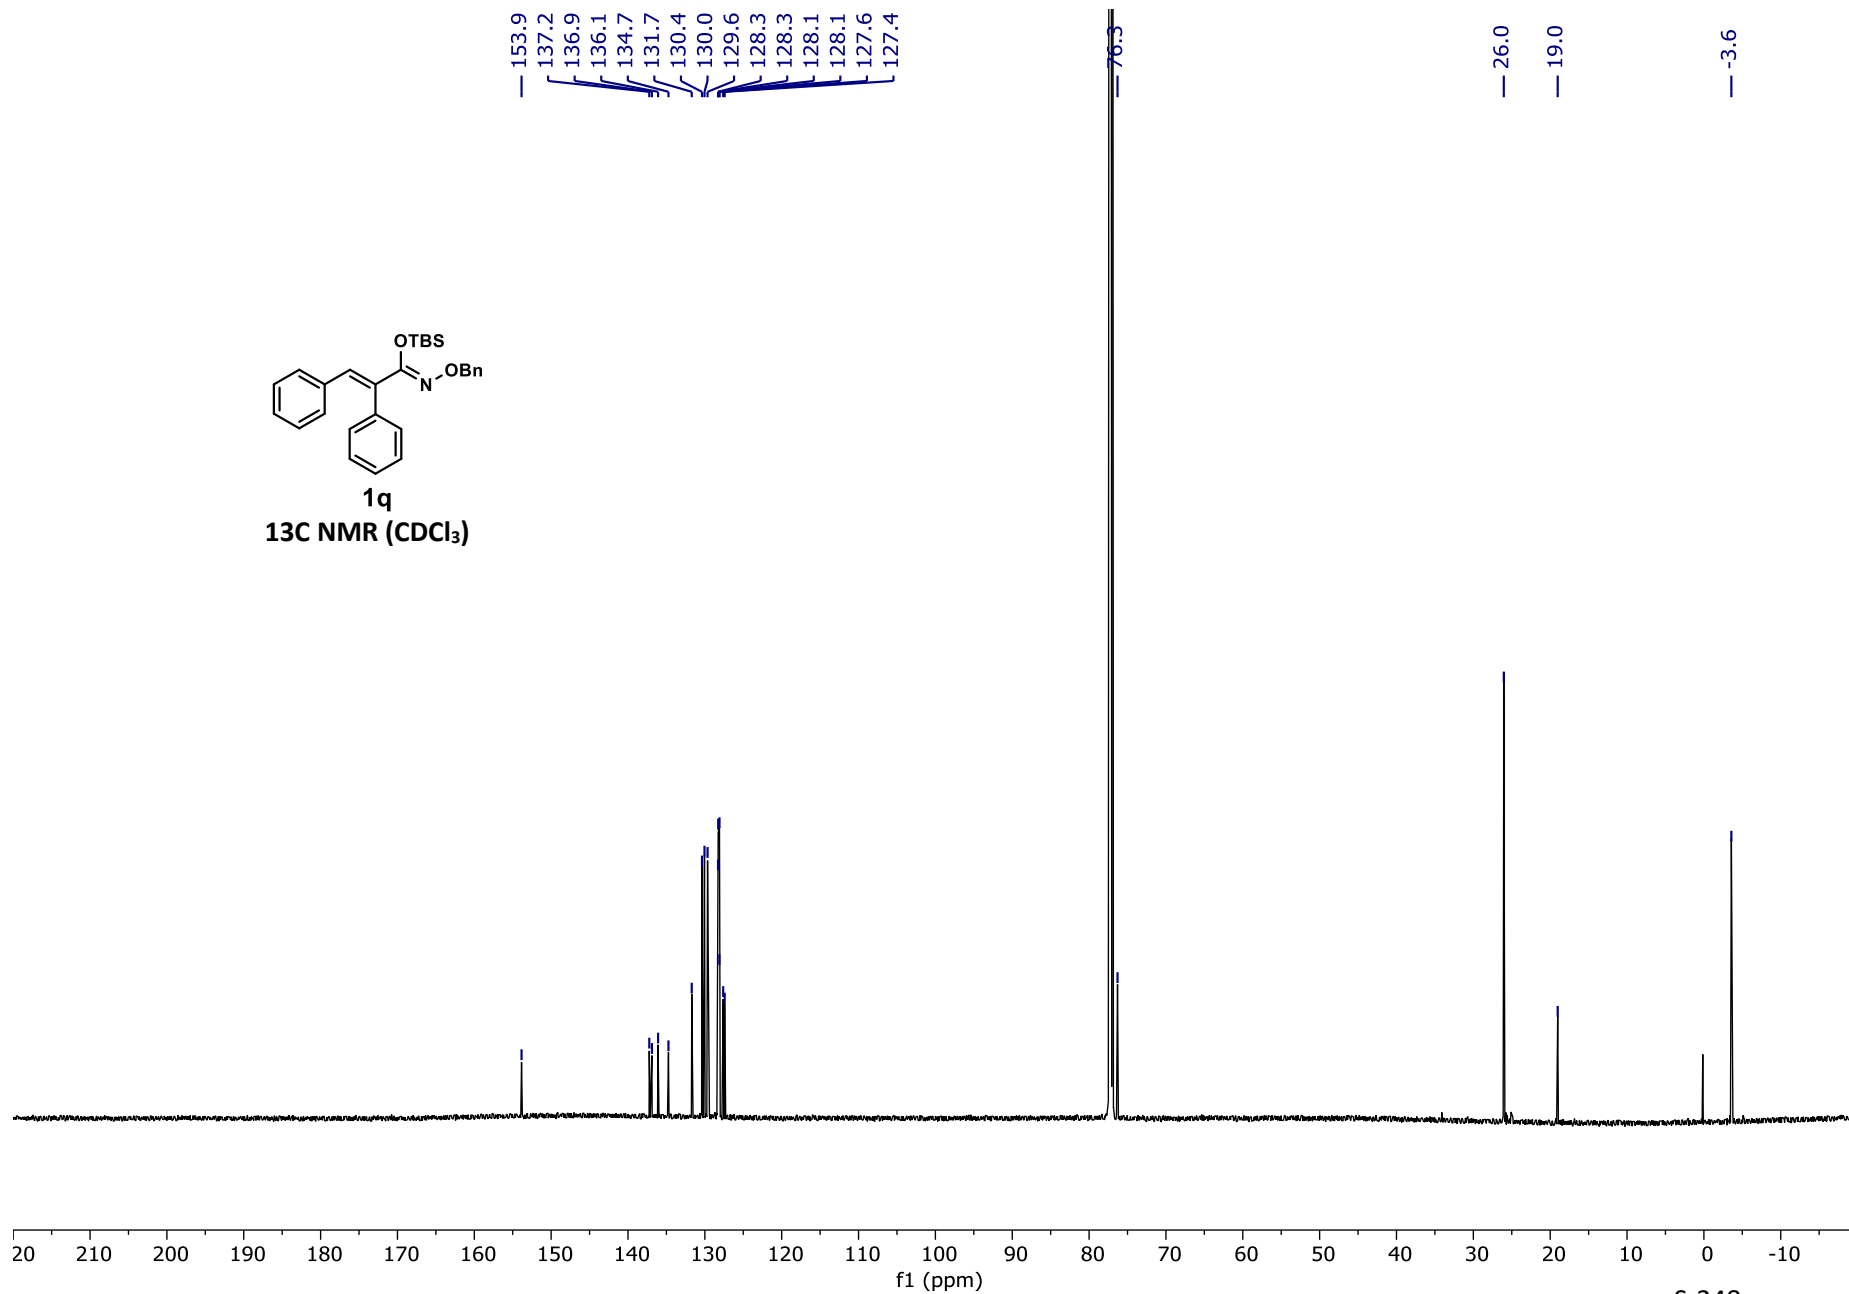

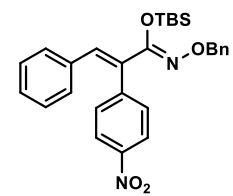

**1r**  
**<sup>1</sup>H NMR (CDCl<sub>3</sub>)**

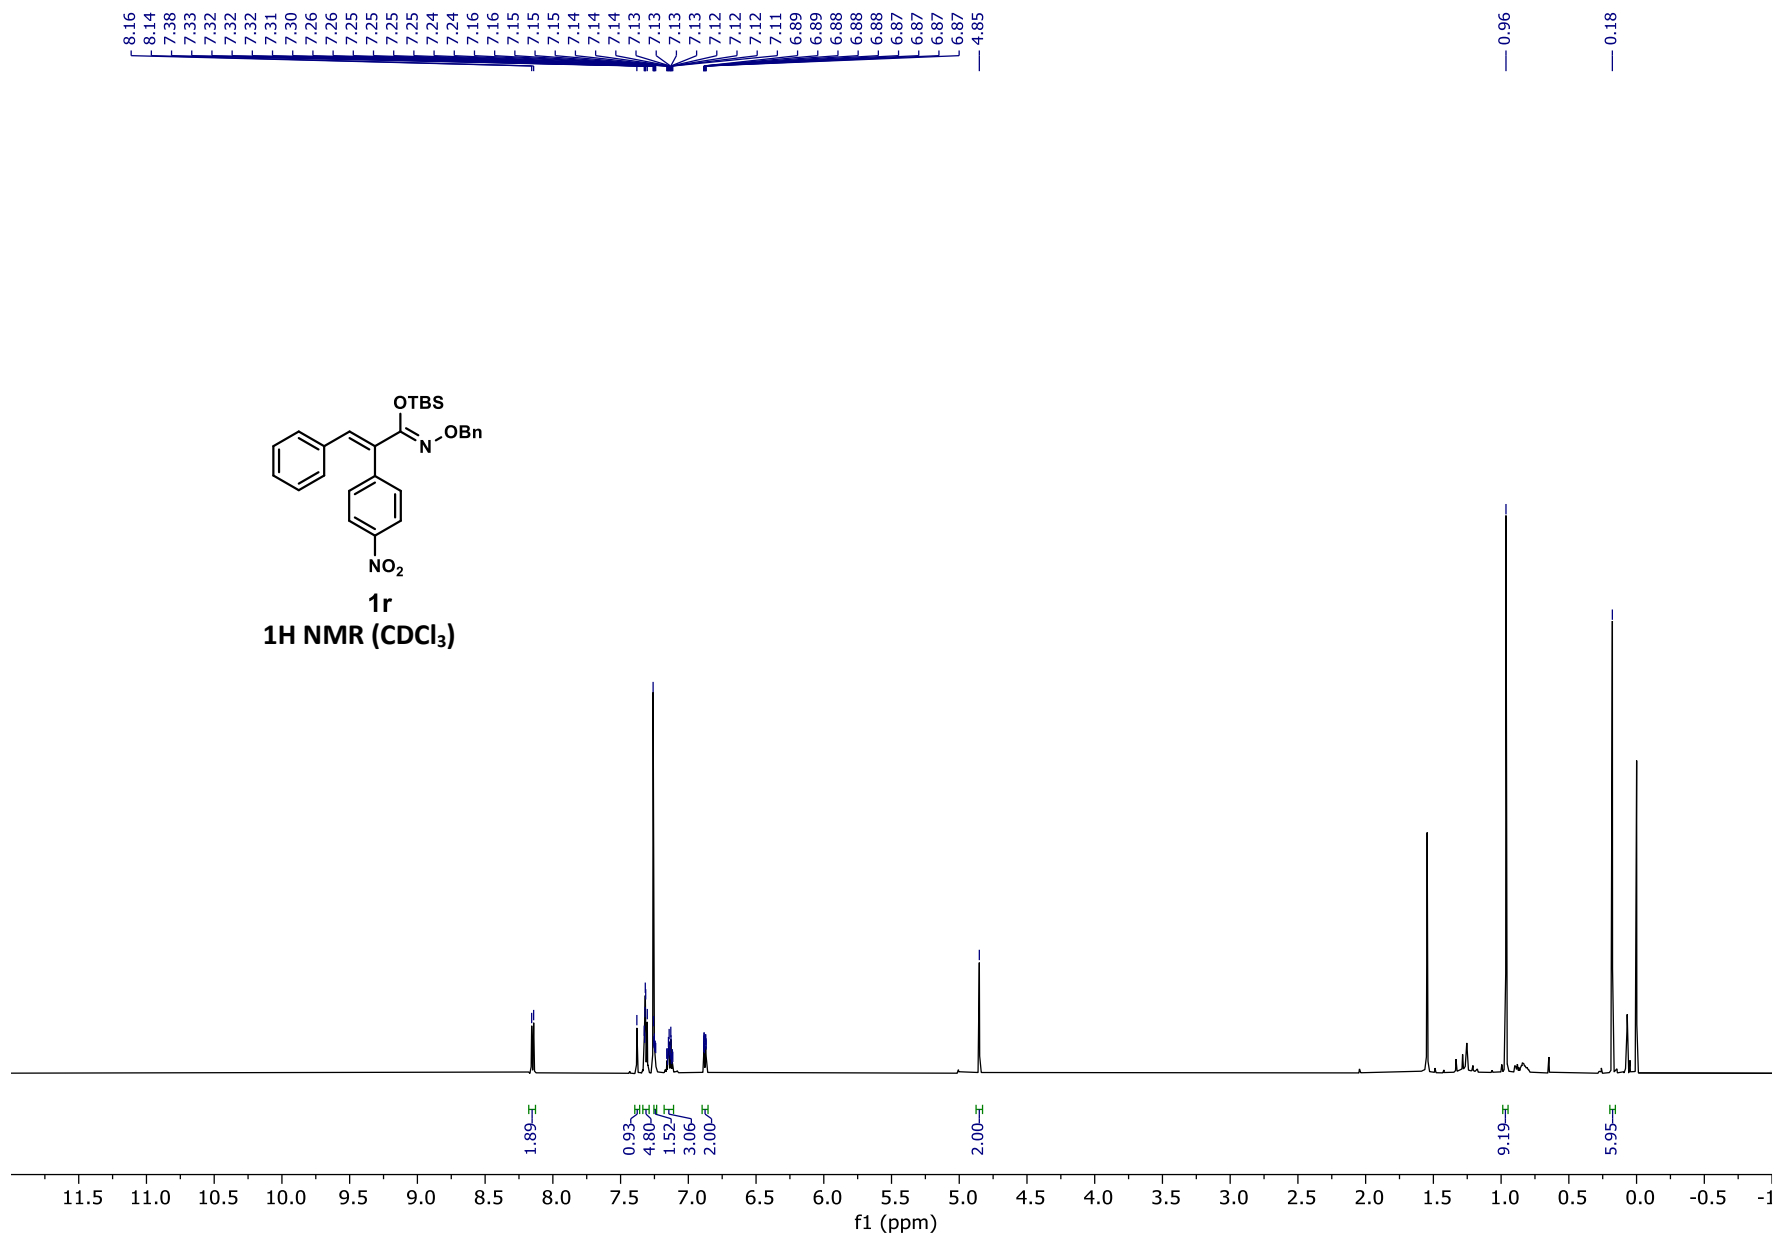

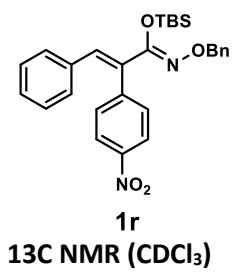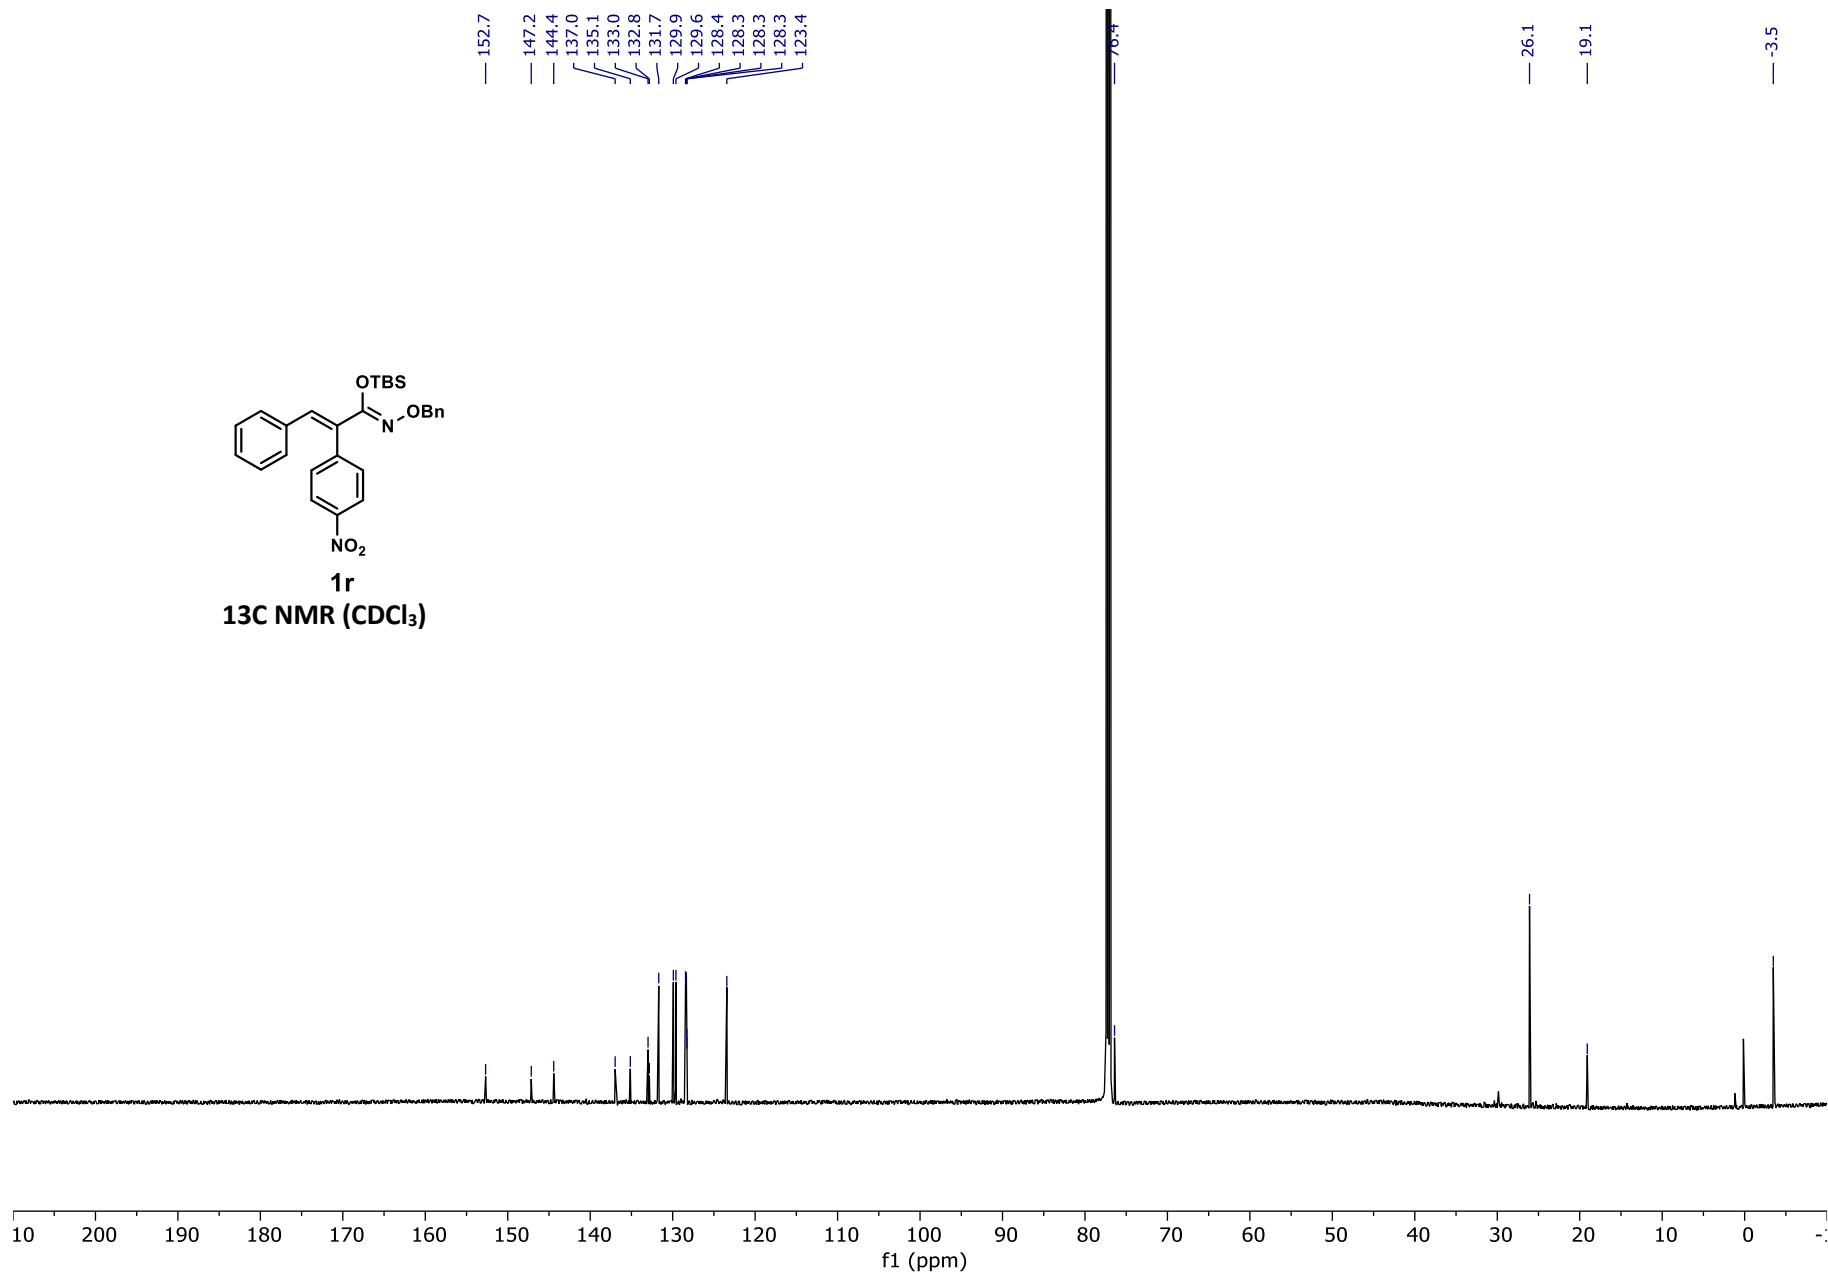

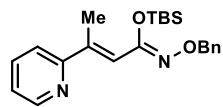

**1s**  
**<sup>1</sup>H NMR (CDCl<sub>3</sub>)**

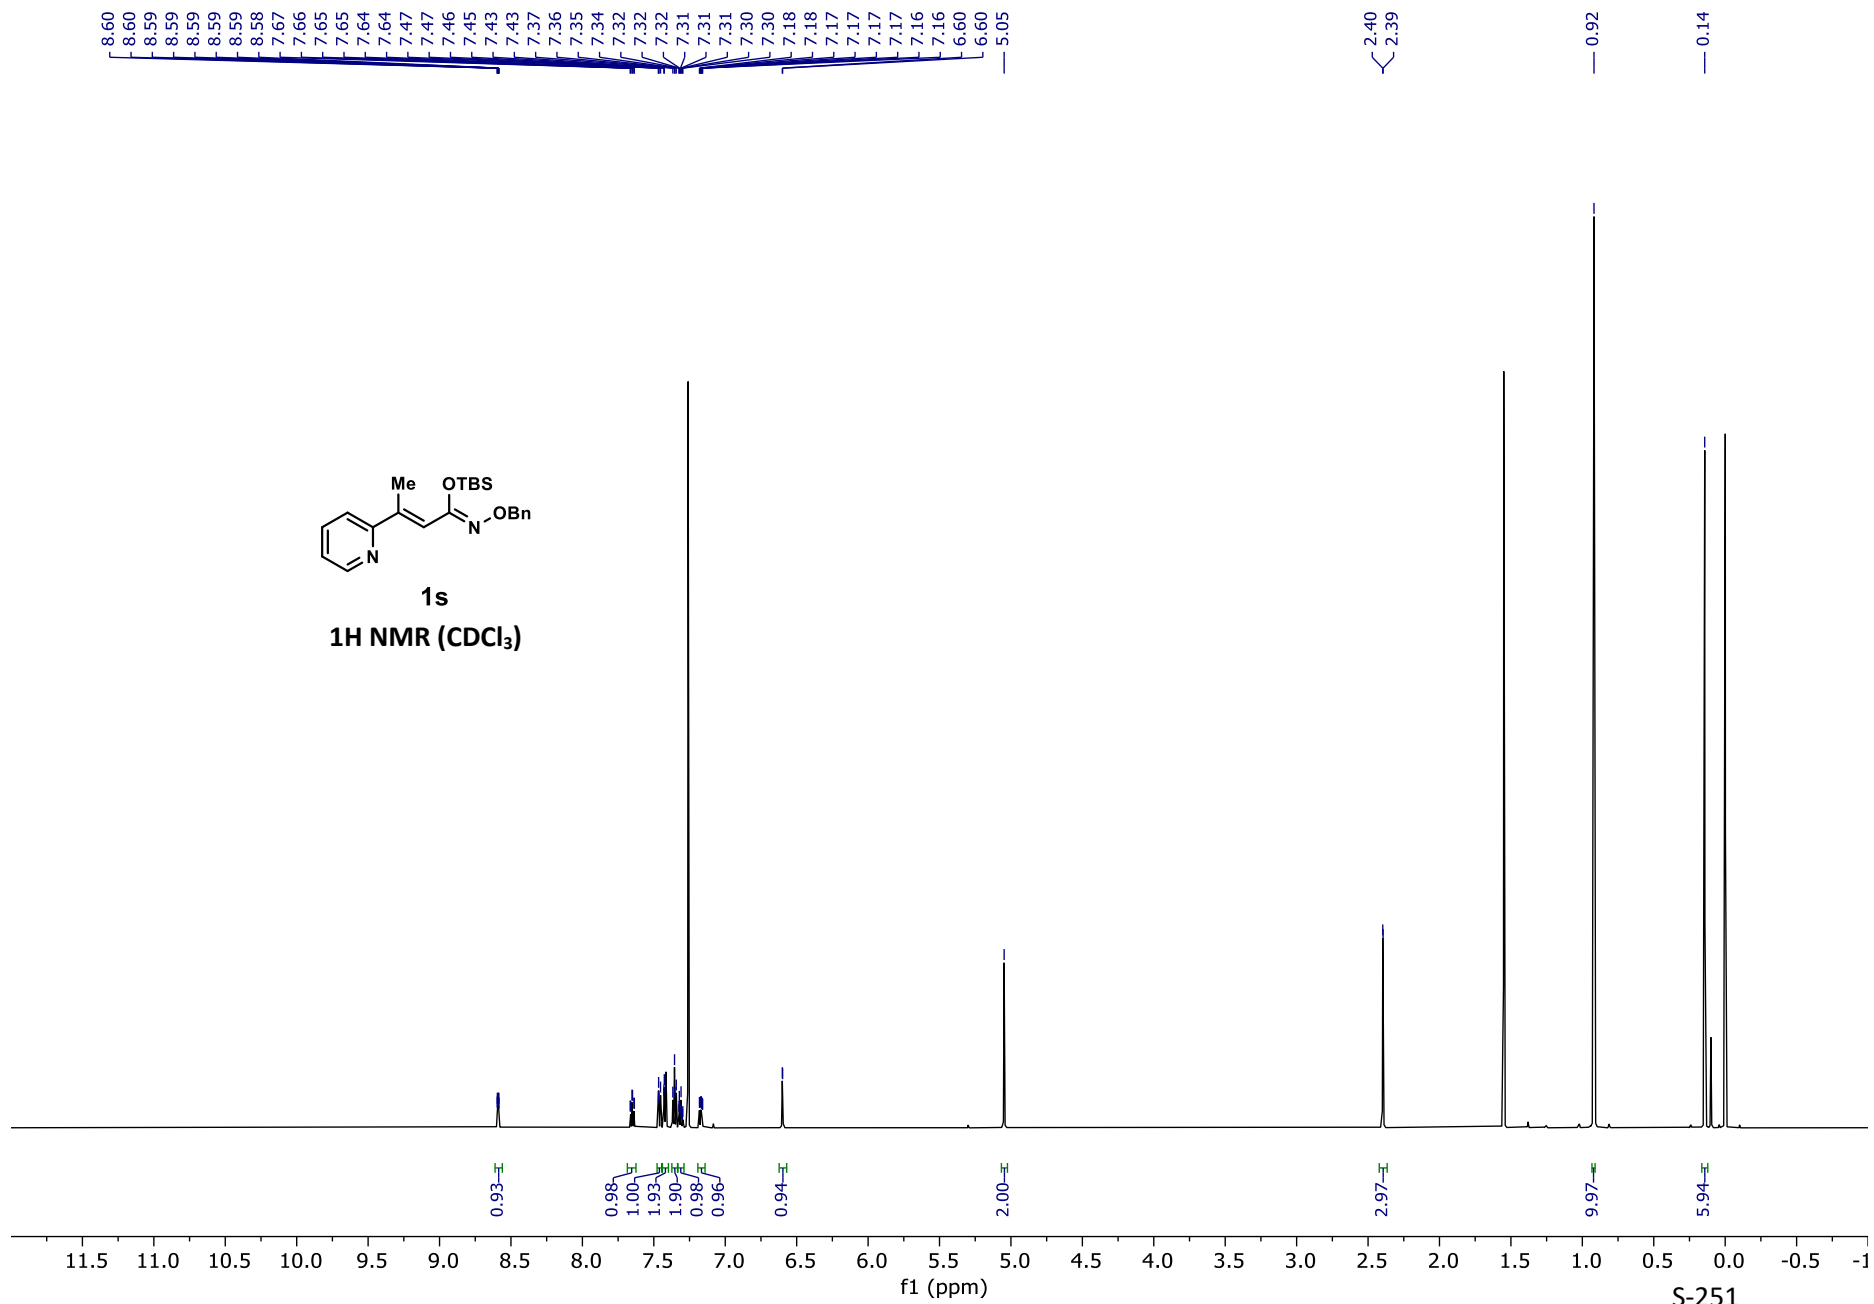

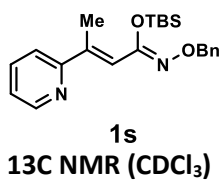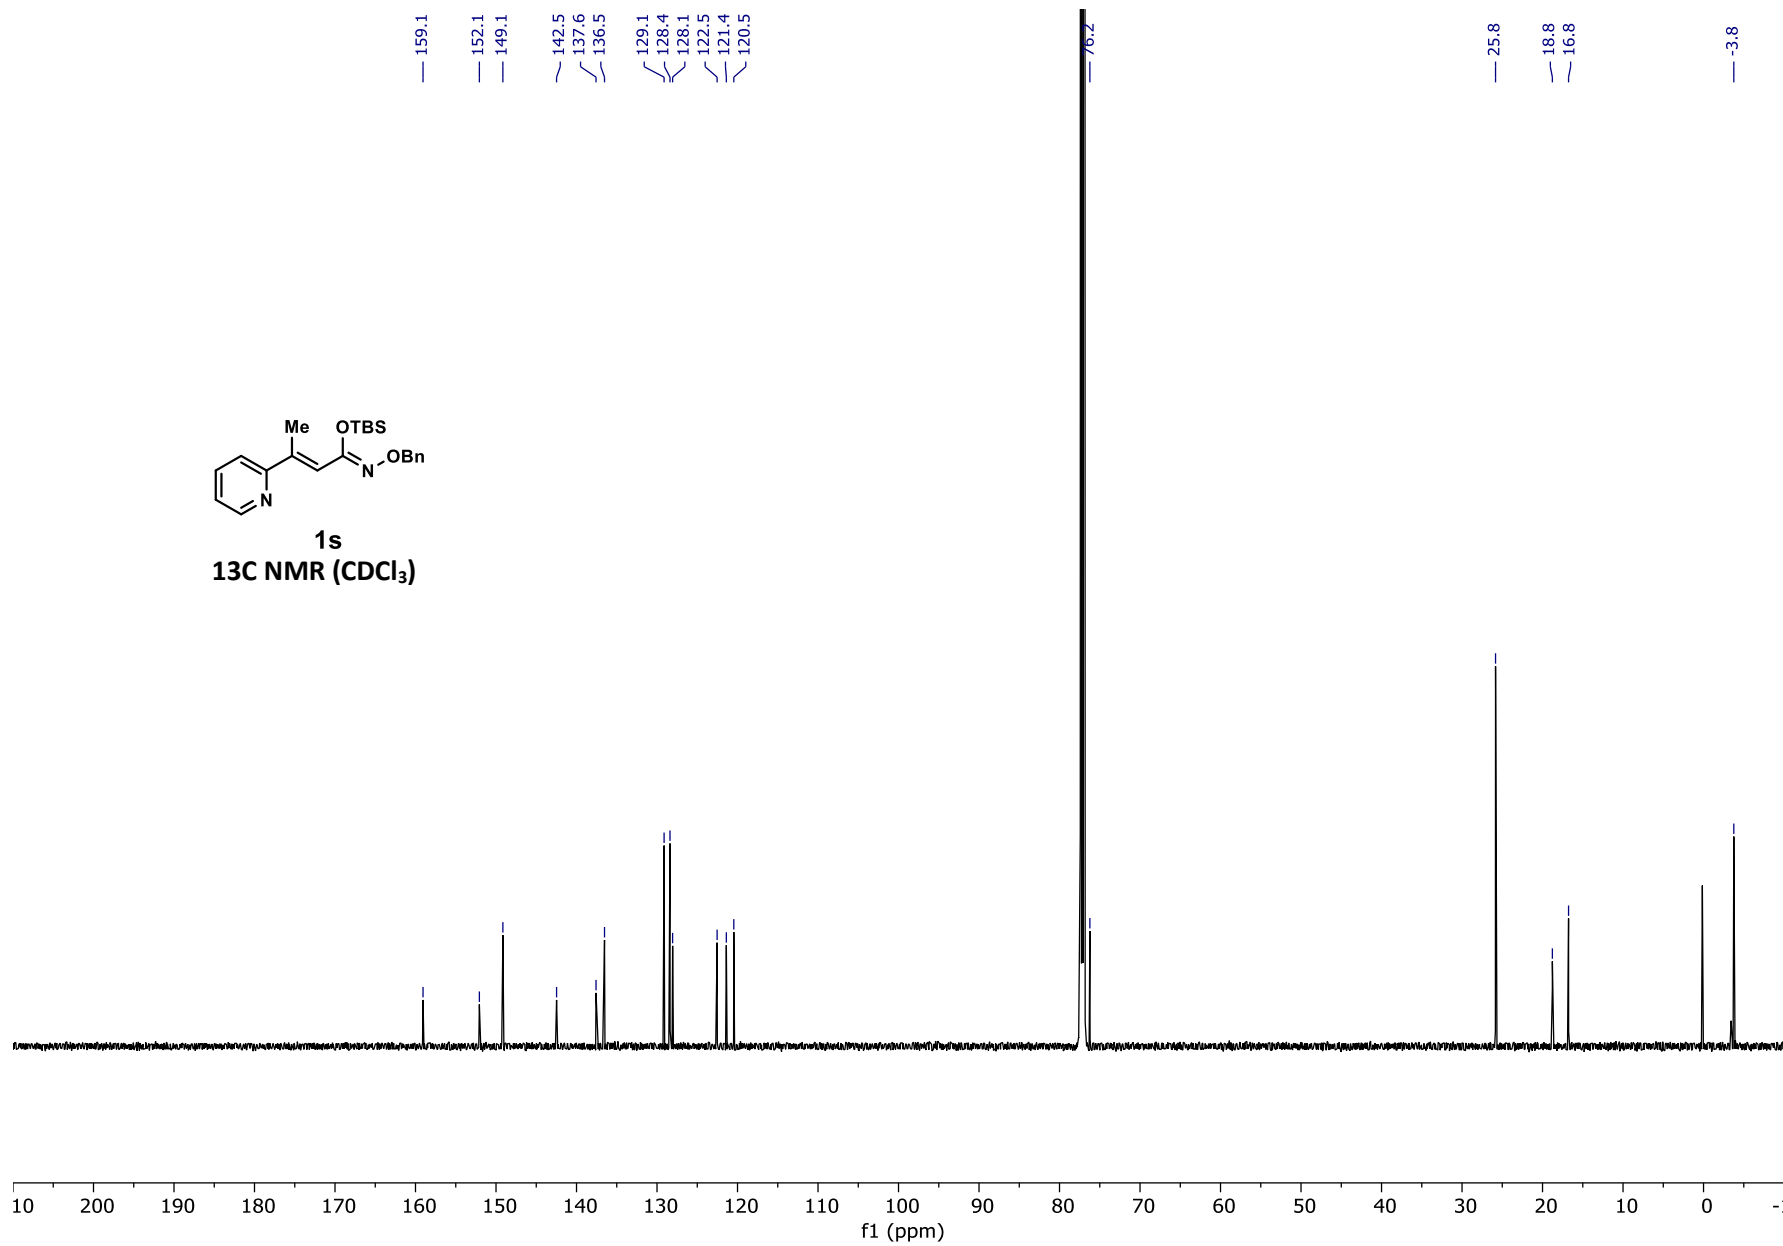



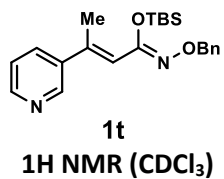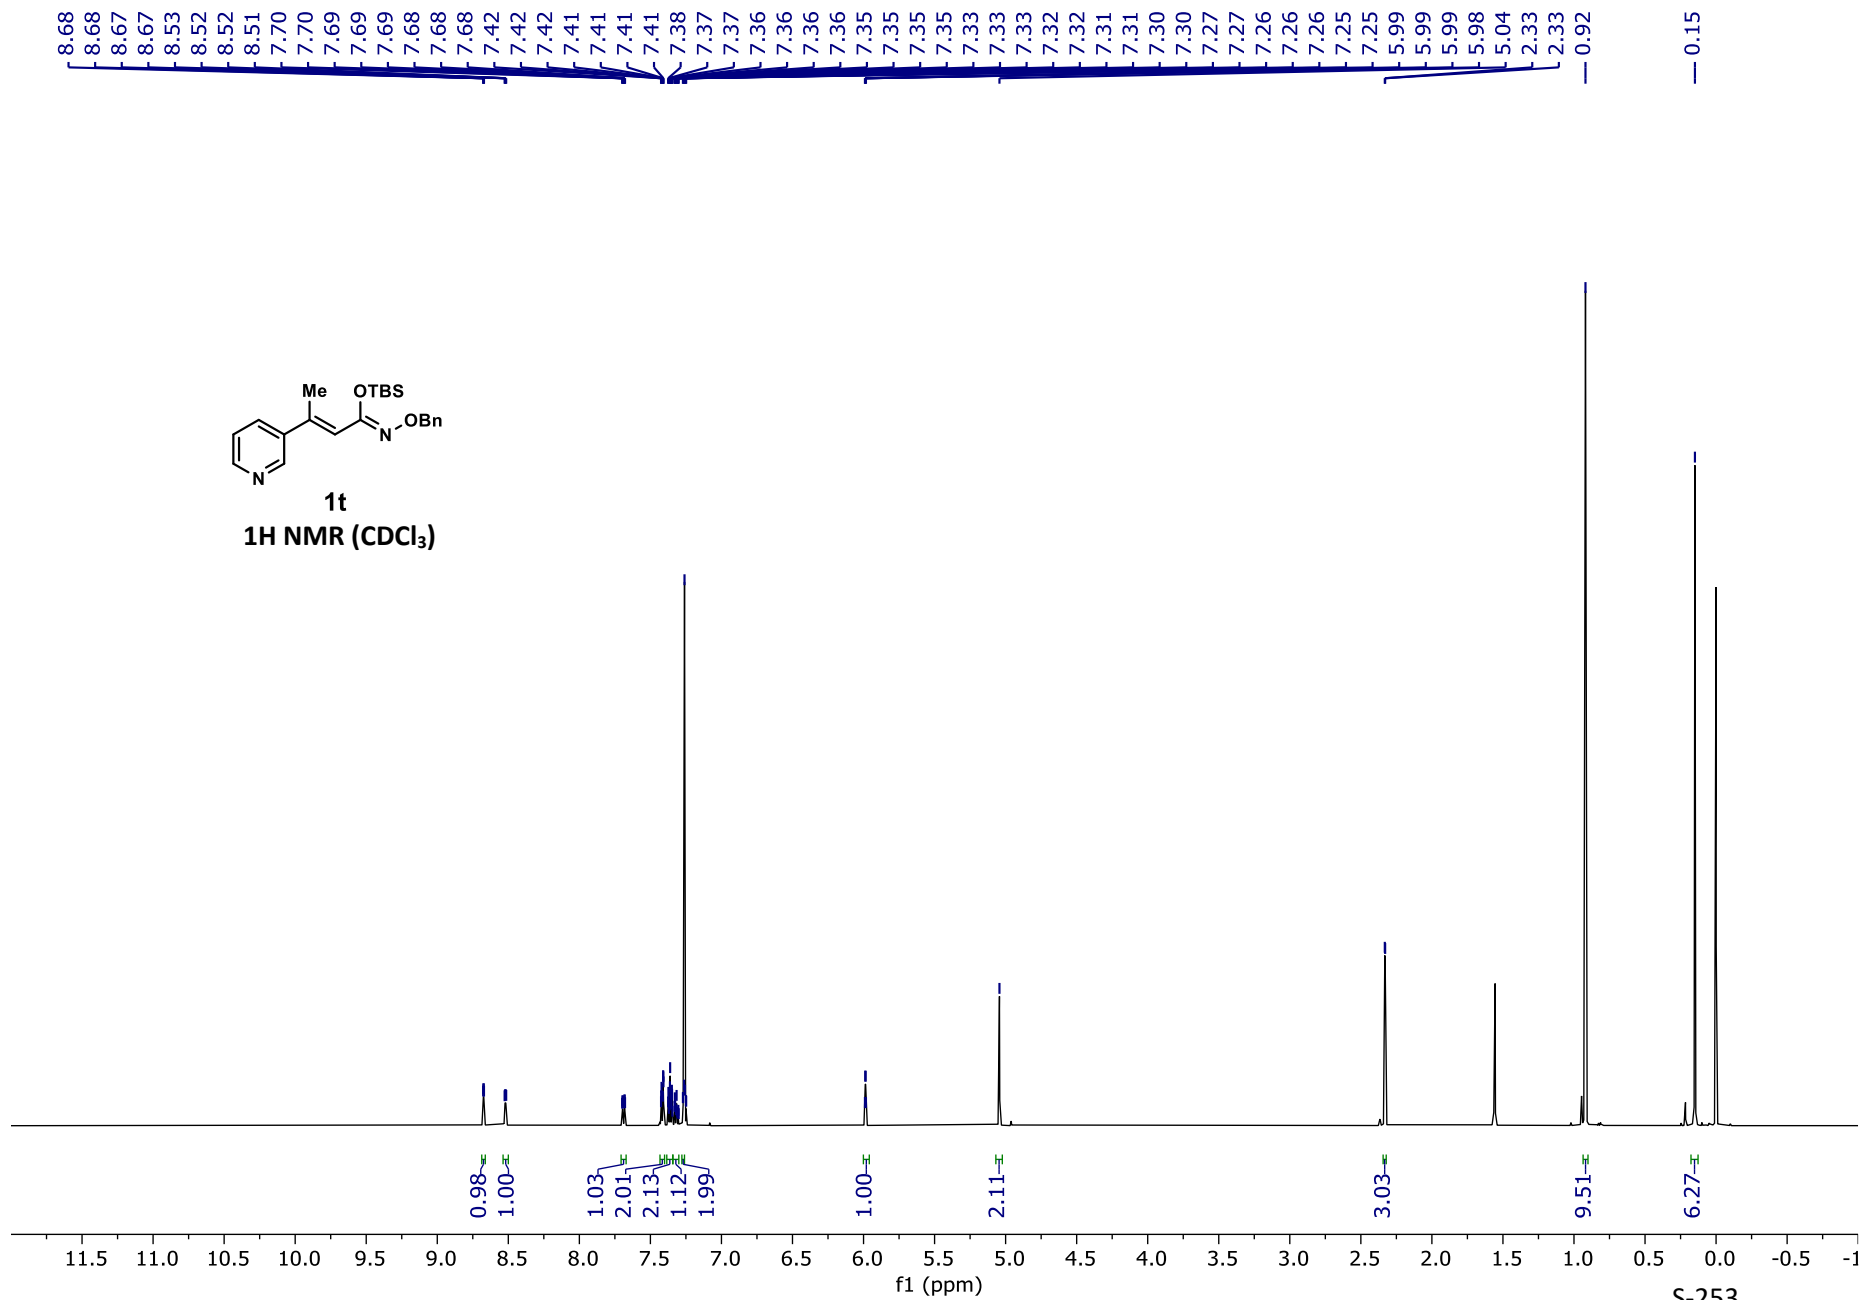

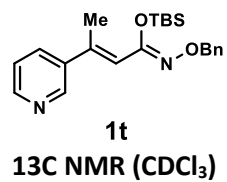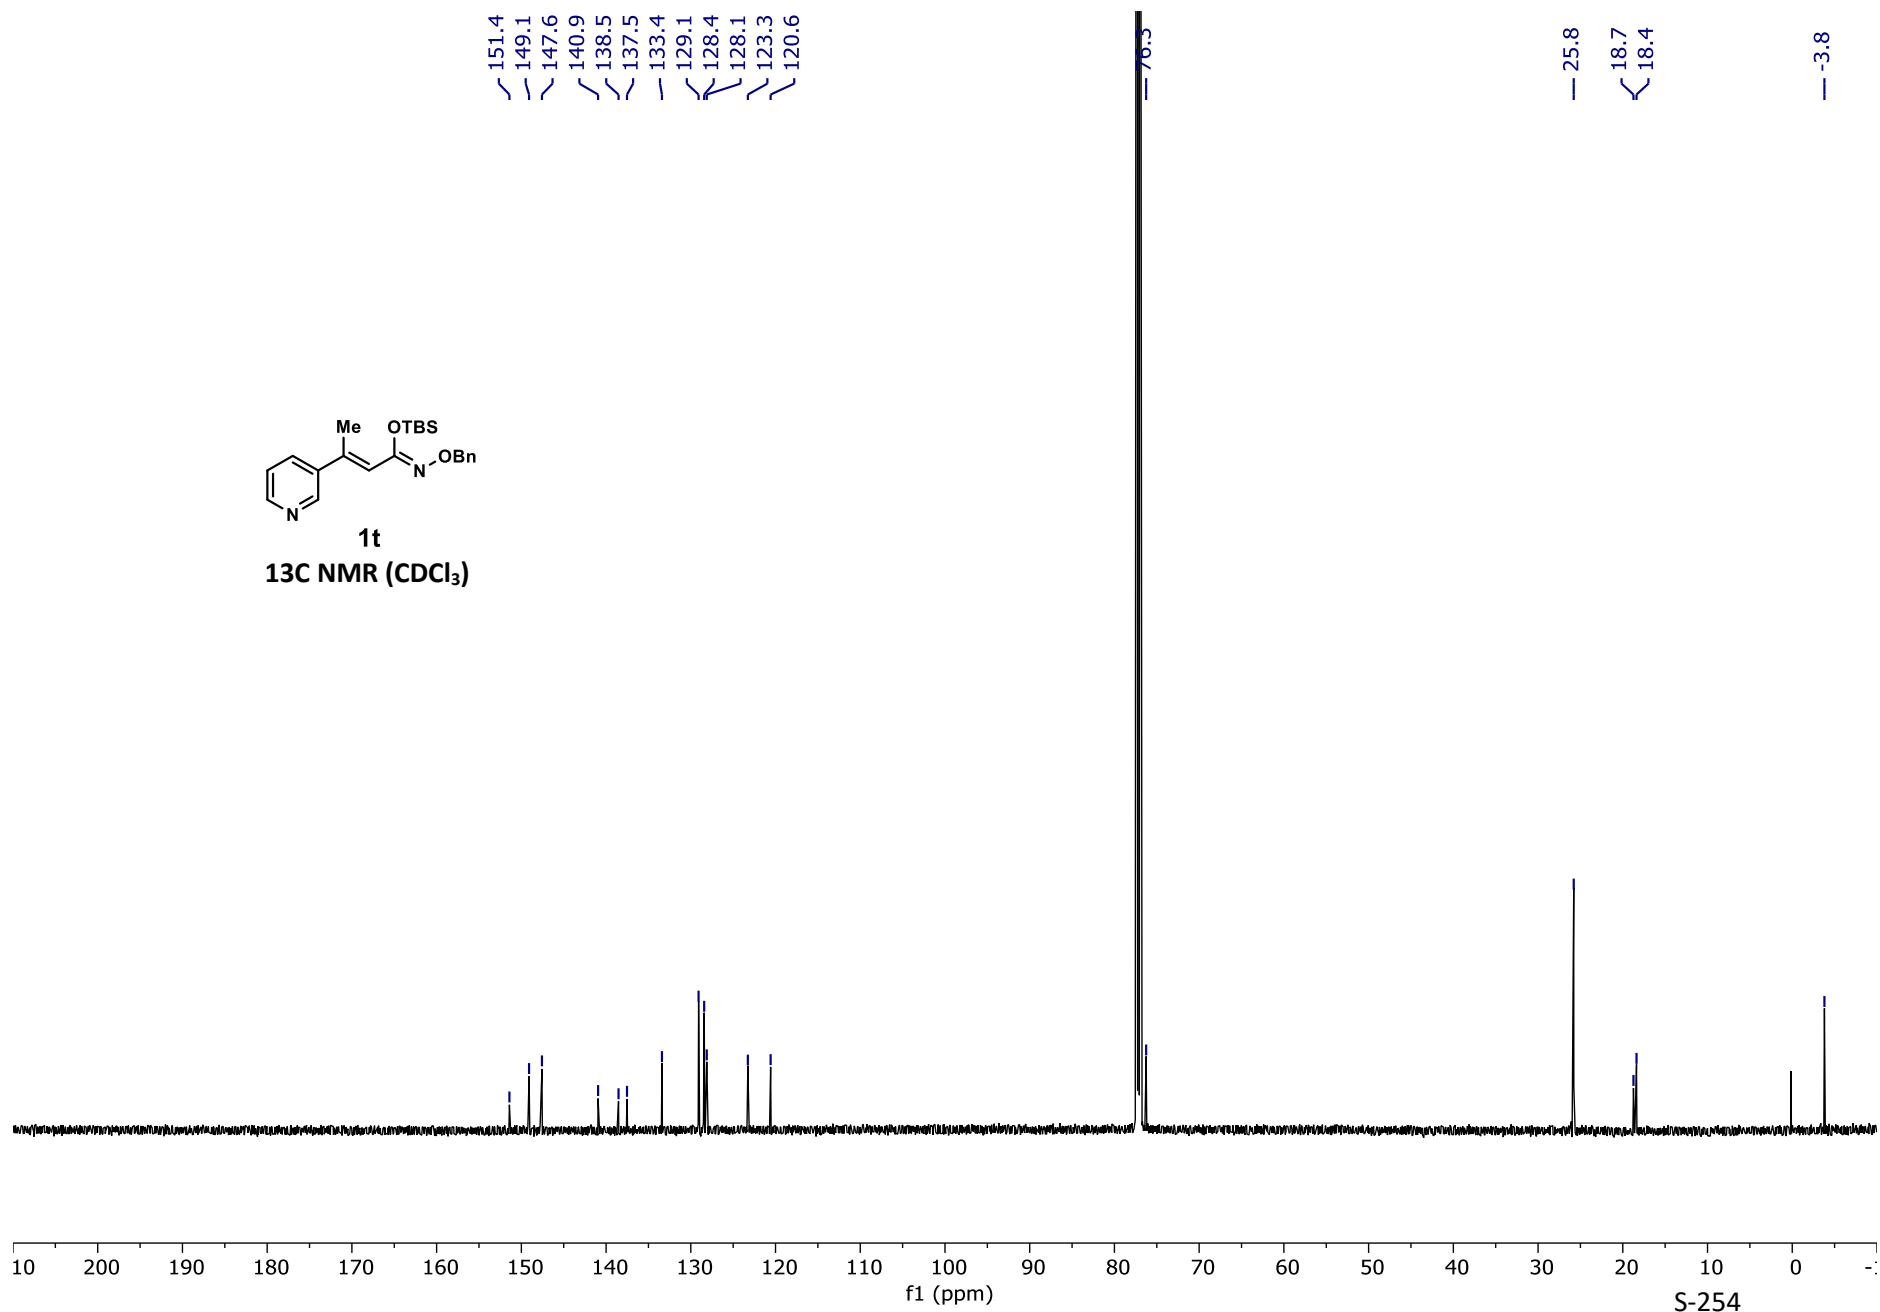

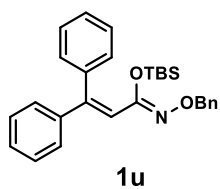

**<sup>1</sup>H NMR (CDCl<sub>3</sub>)**

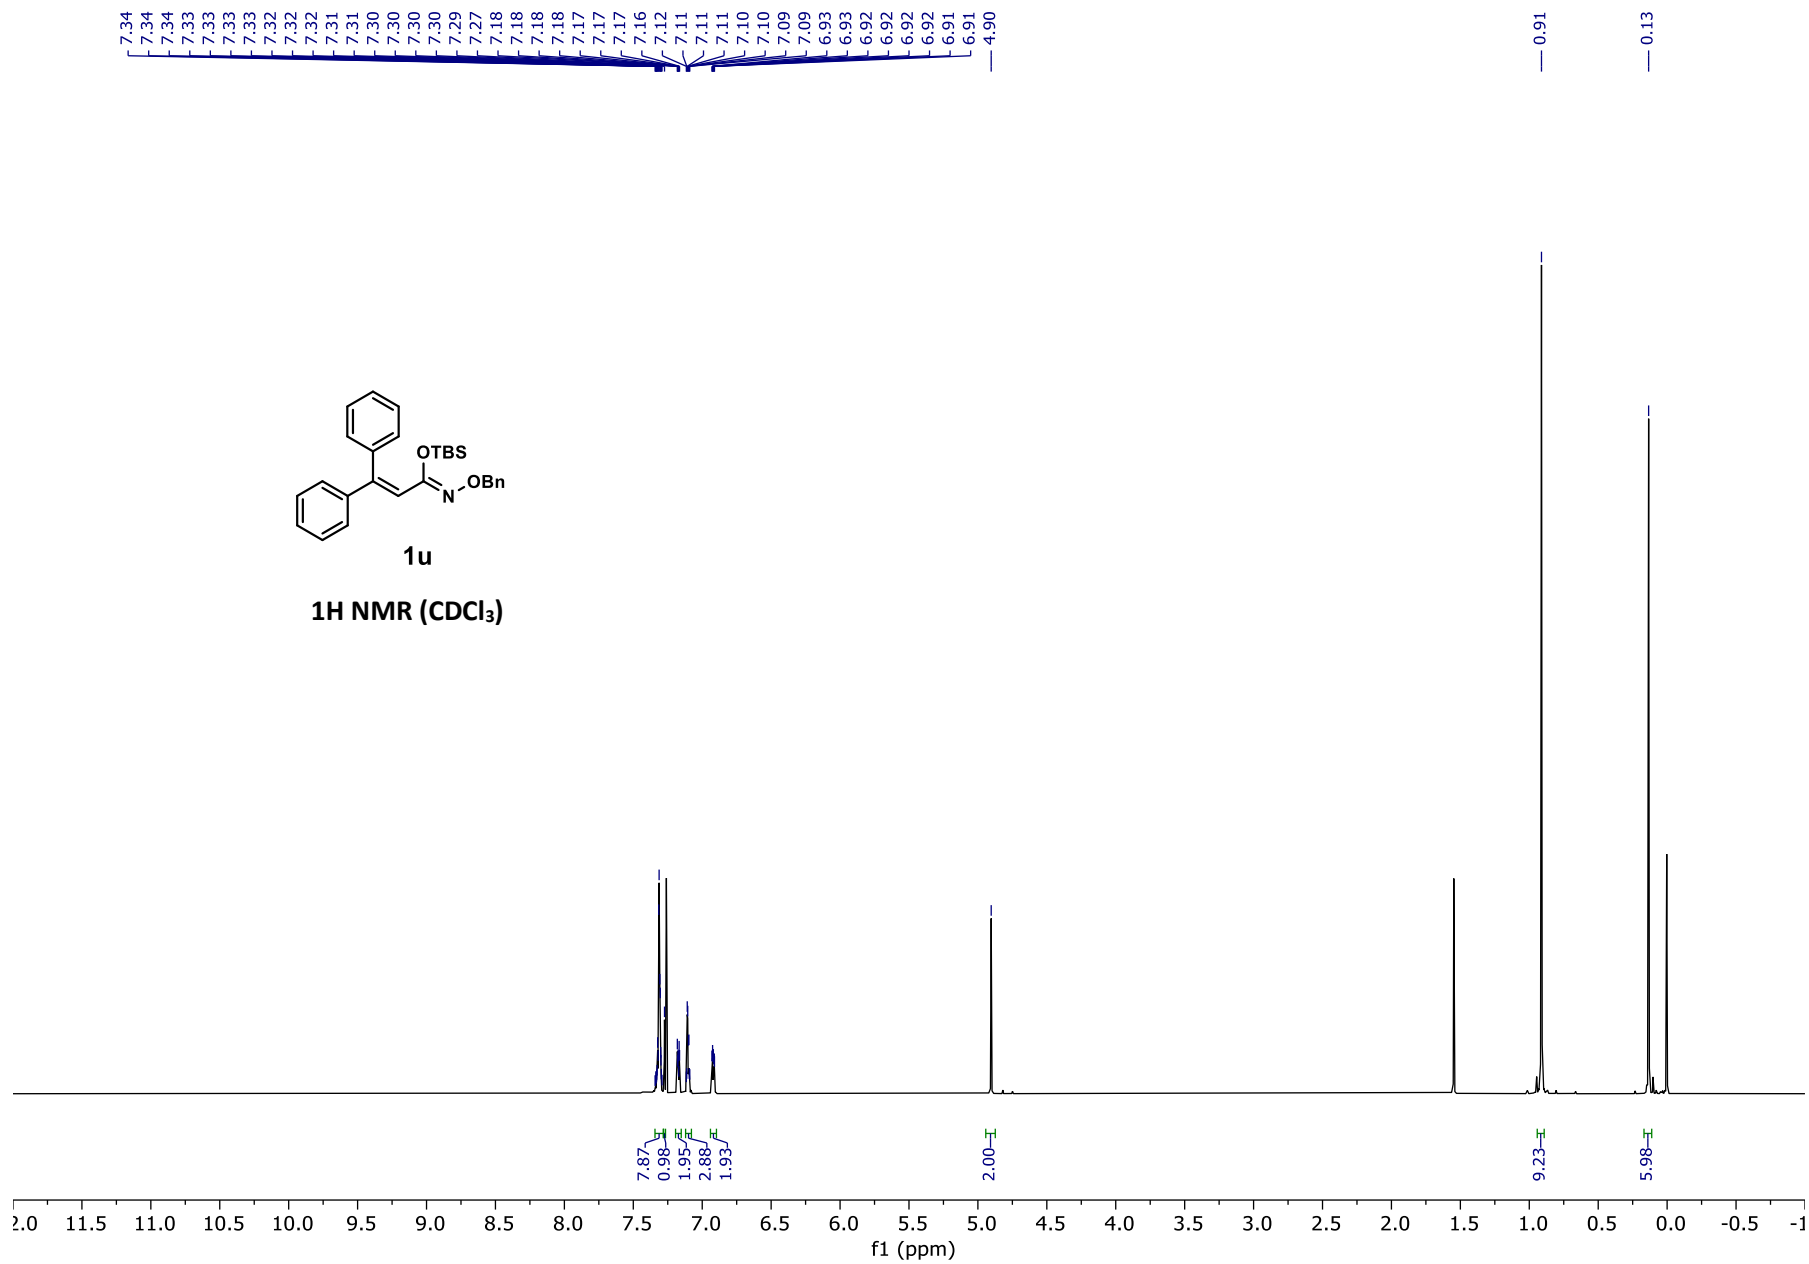

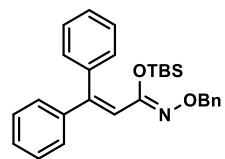

1u

<sup>13</sup>C NMR (CDCl<sub>3</sub>)

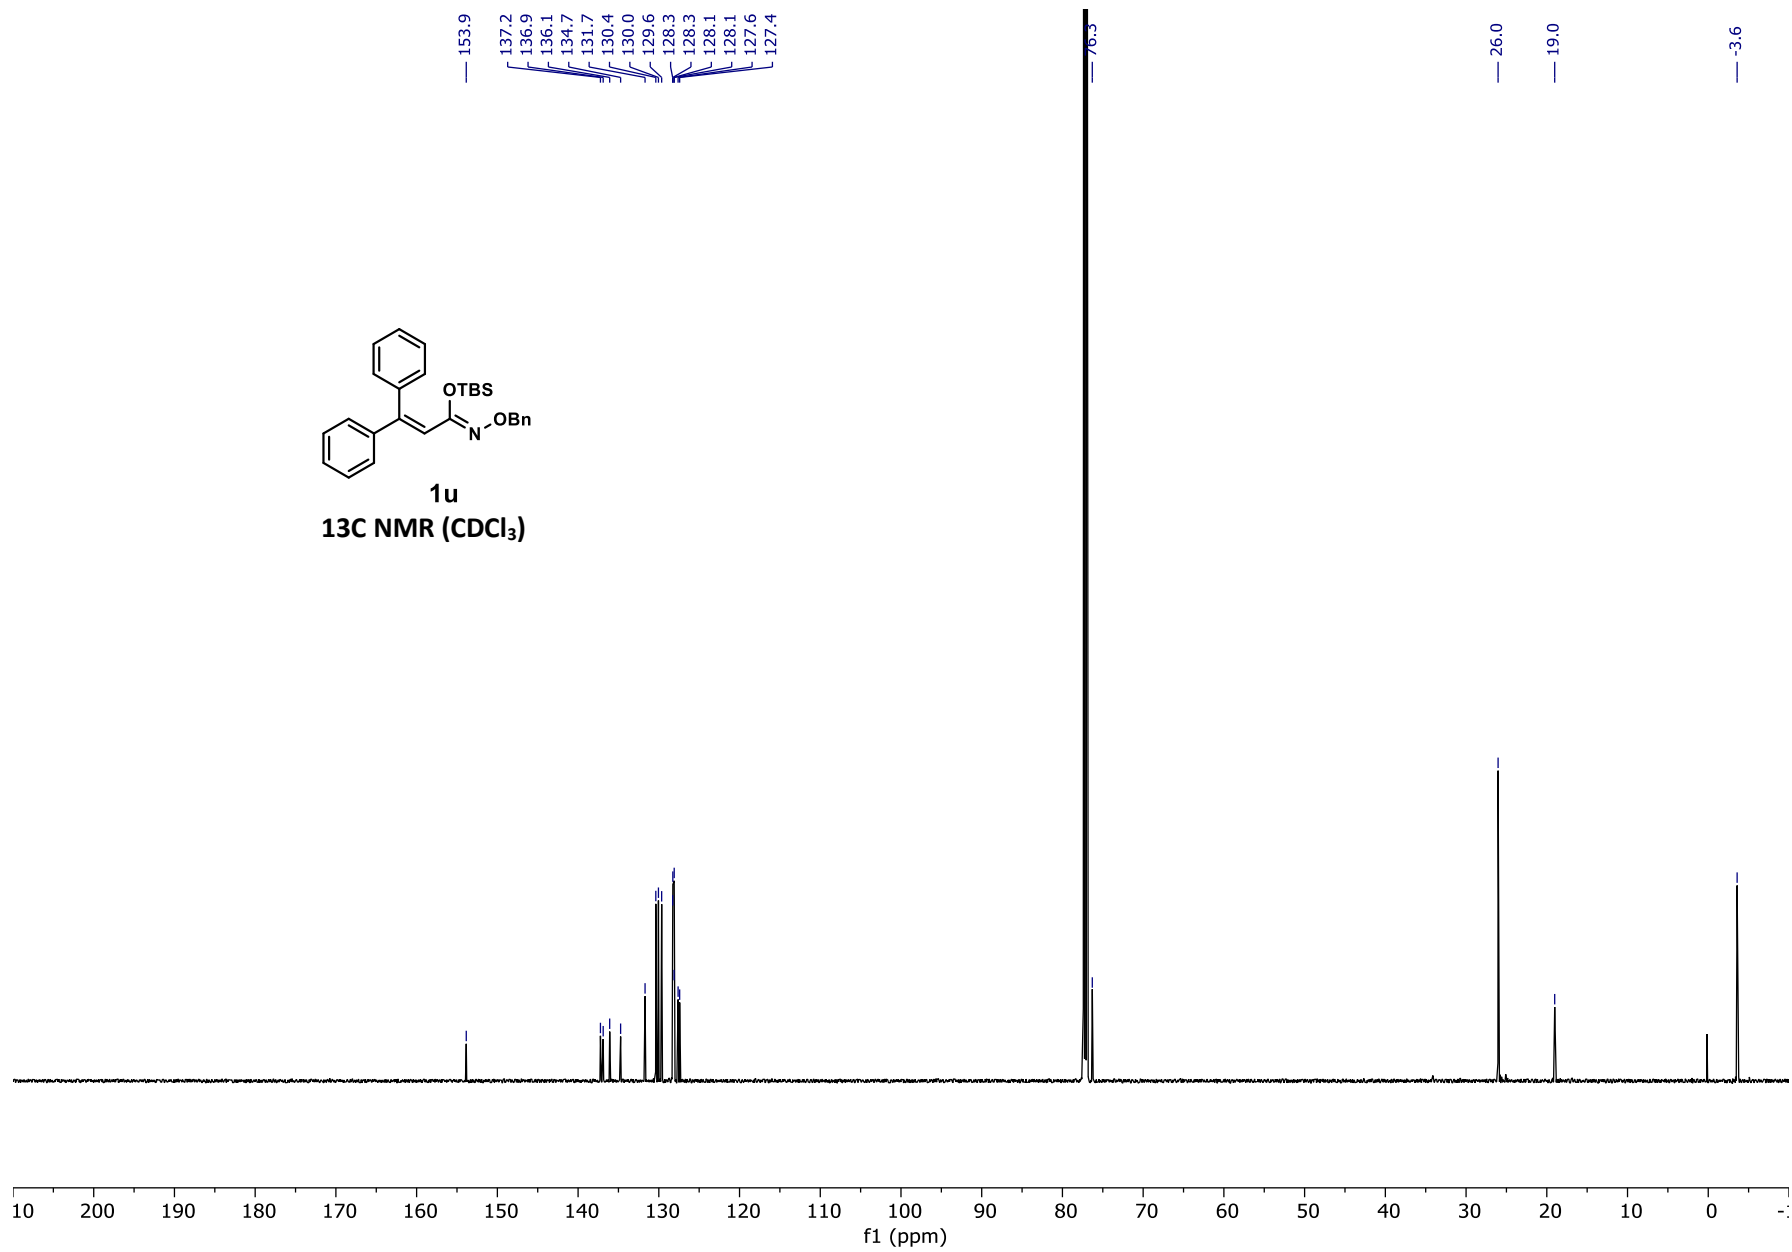

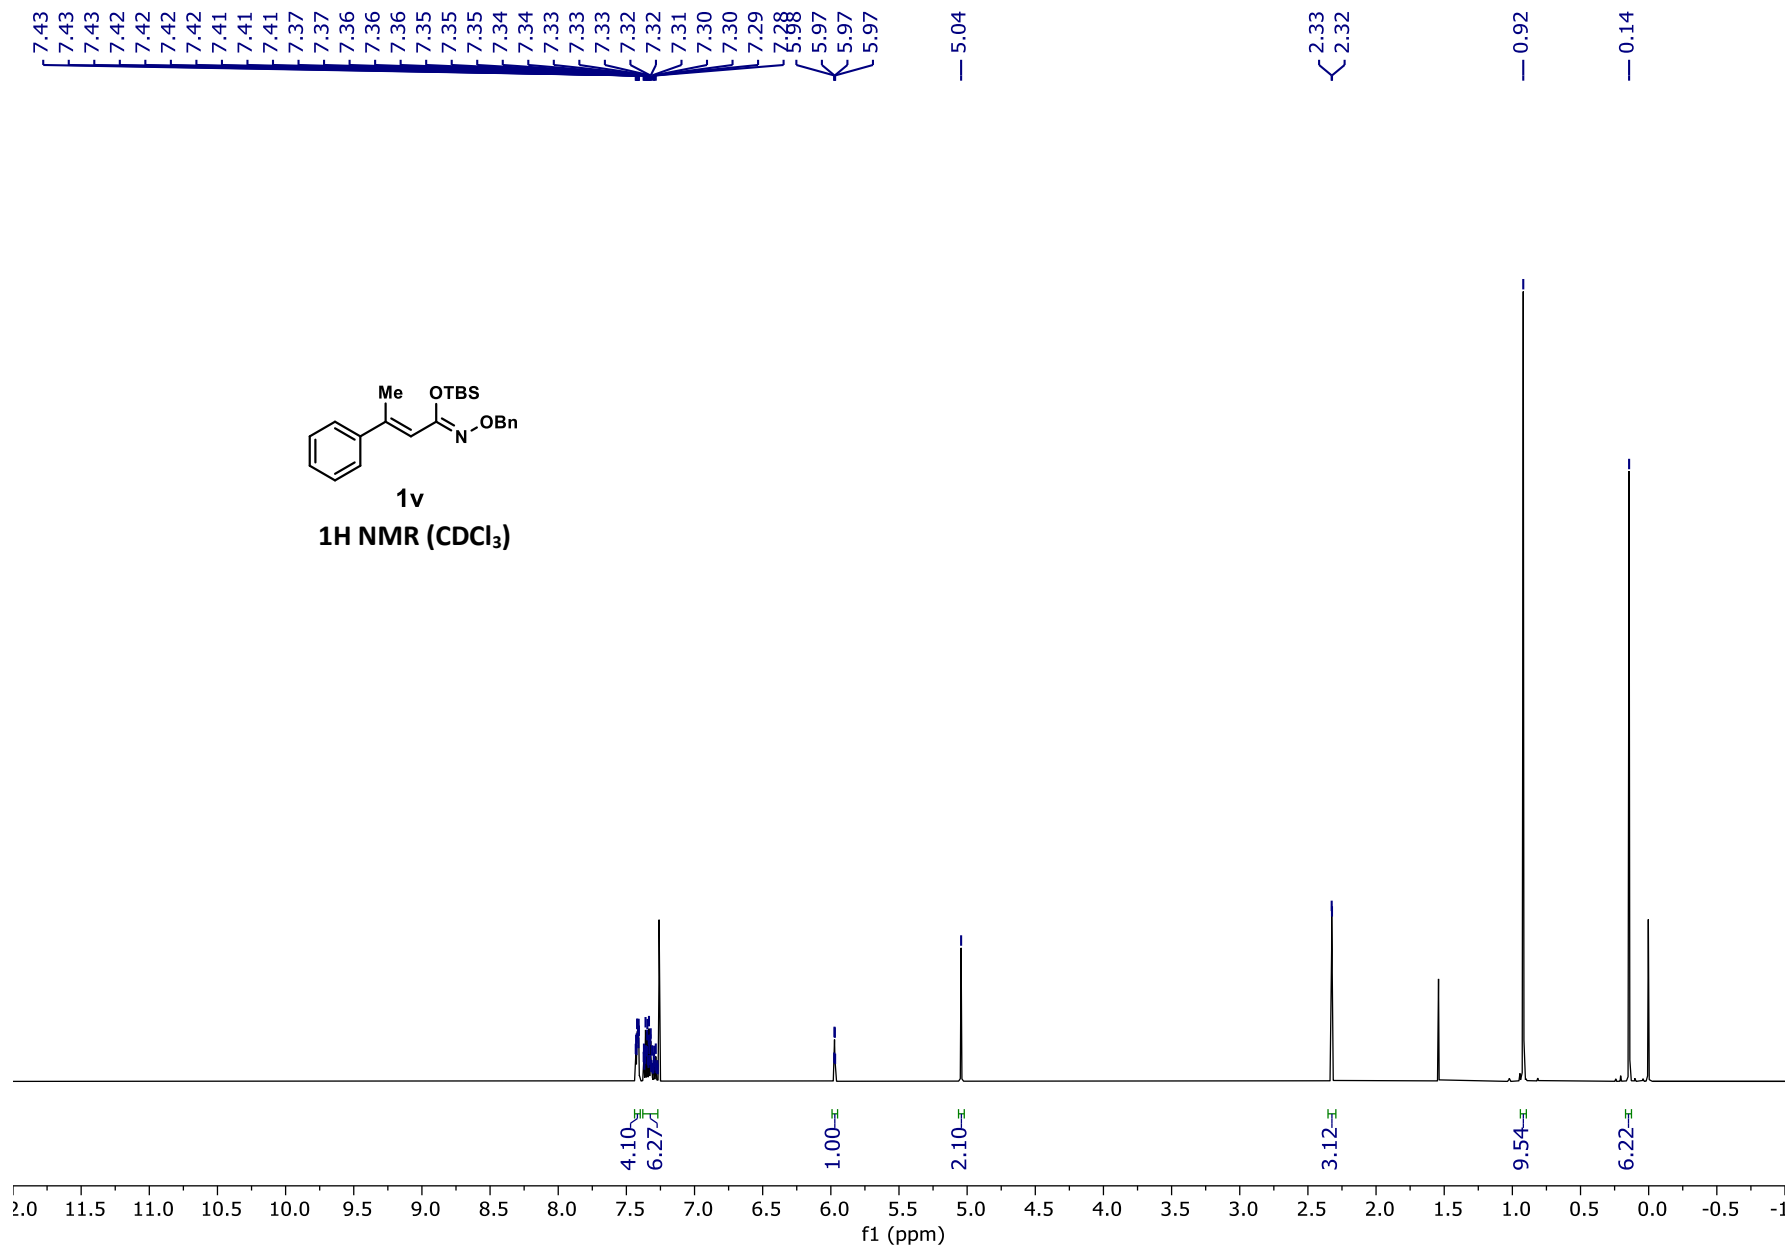

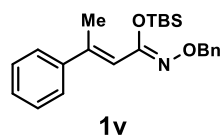

**<sup>13</sup>C NMR (CDCl<sub>3</sub>)**

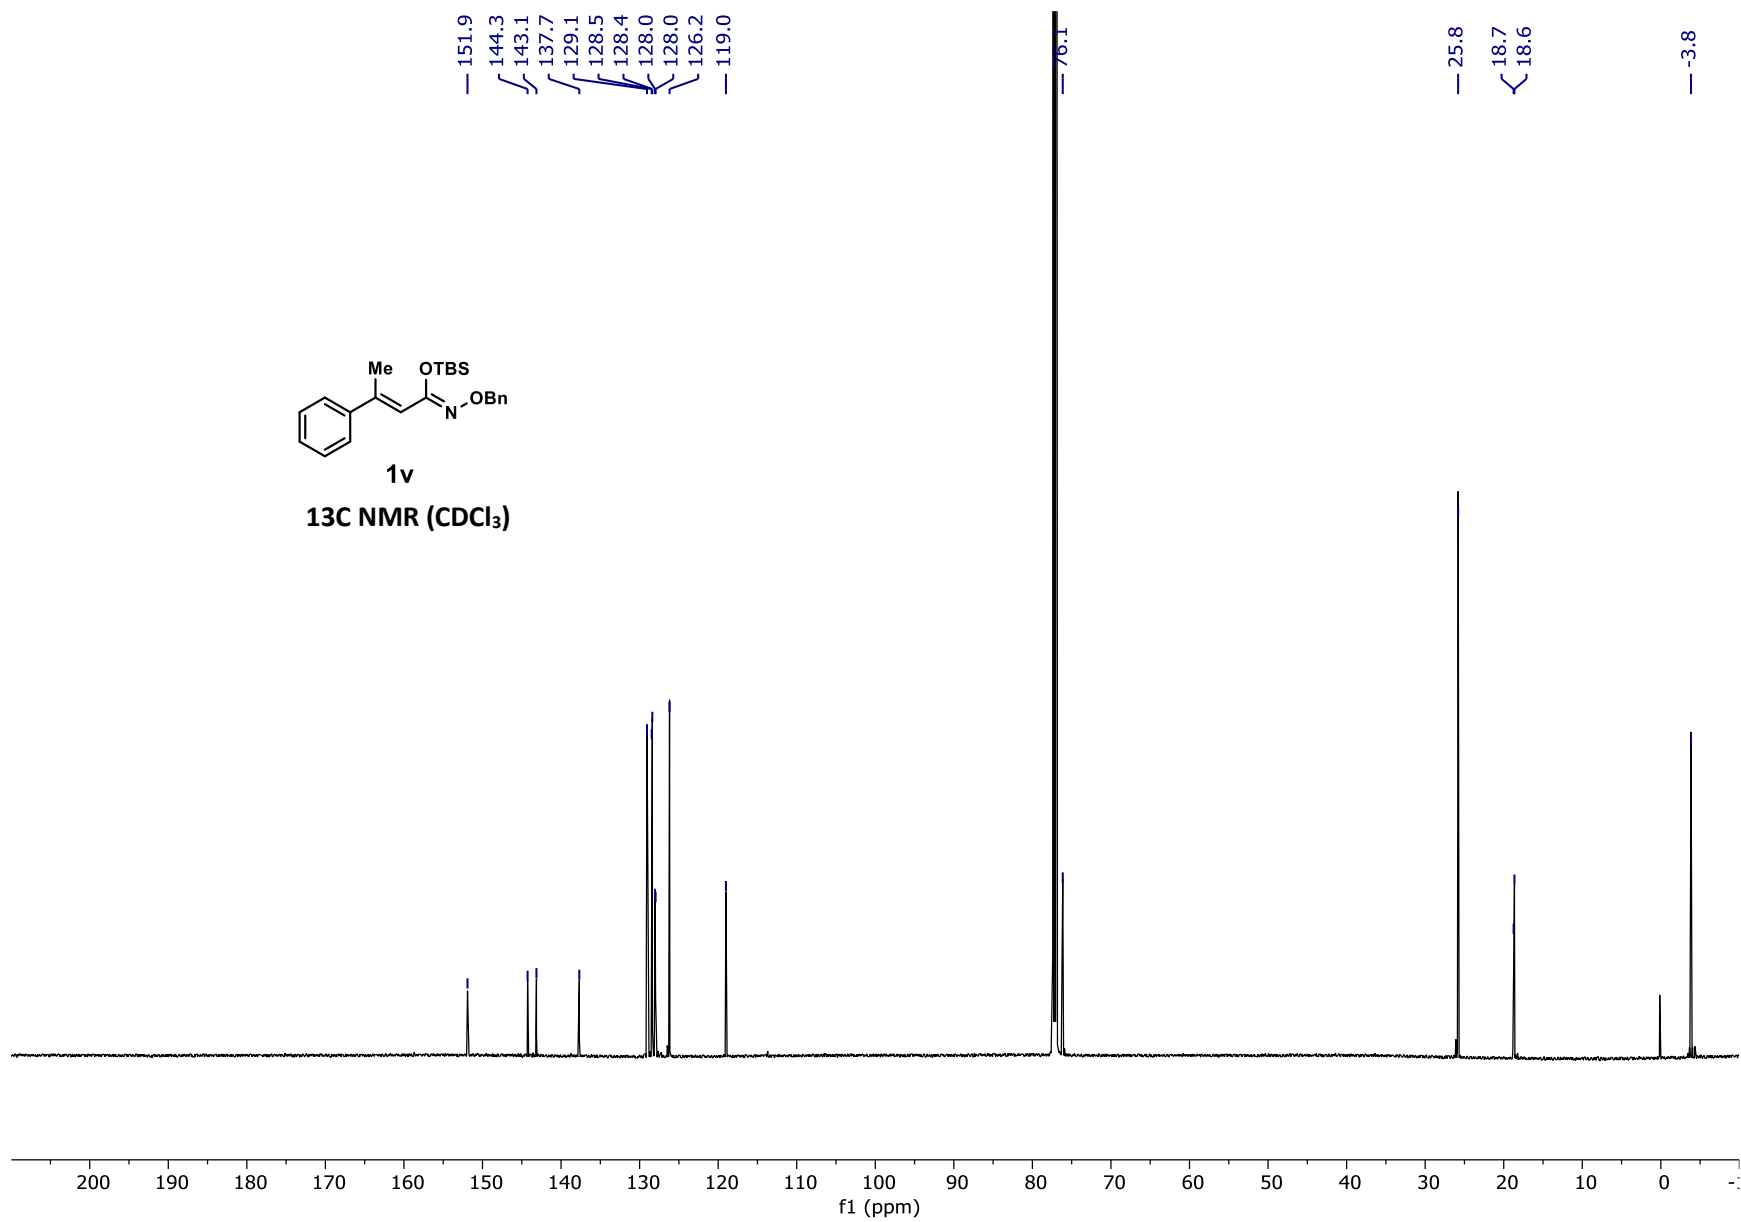

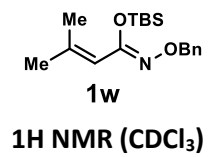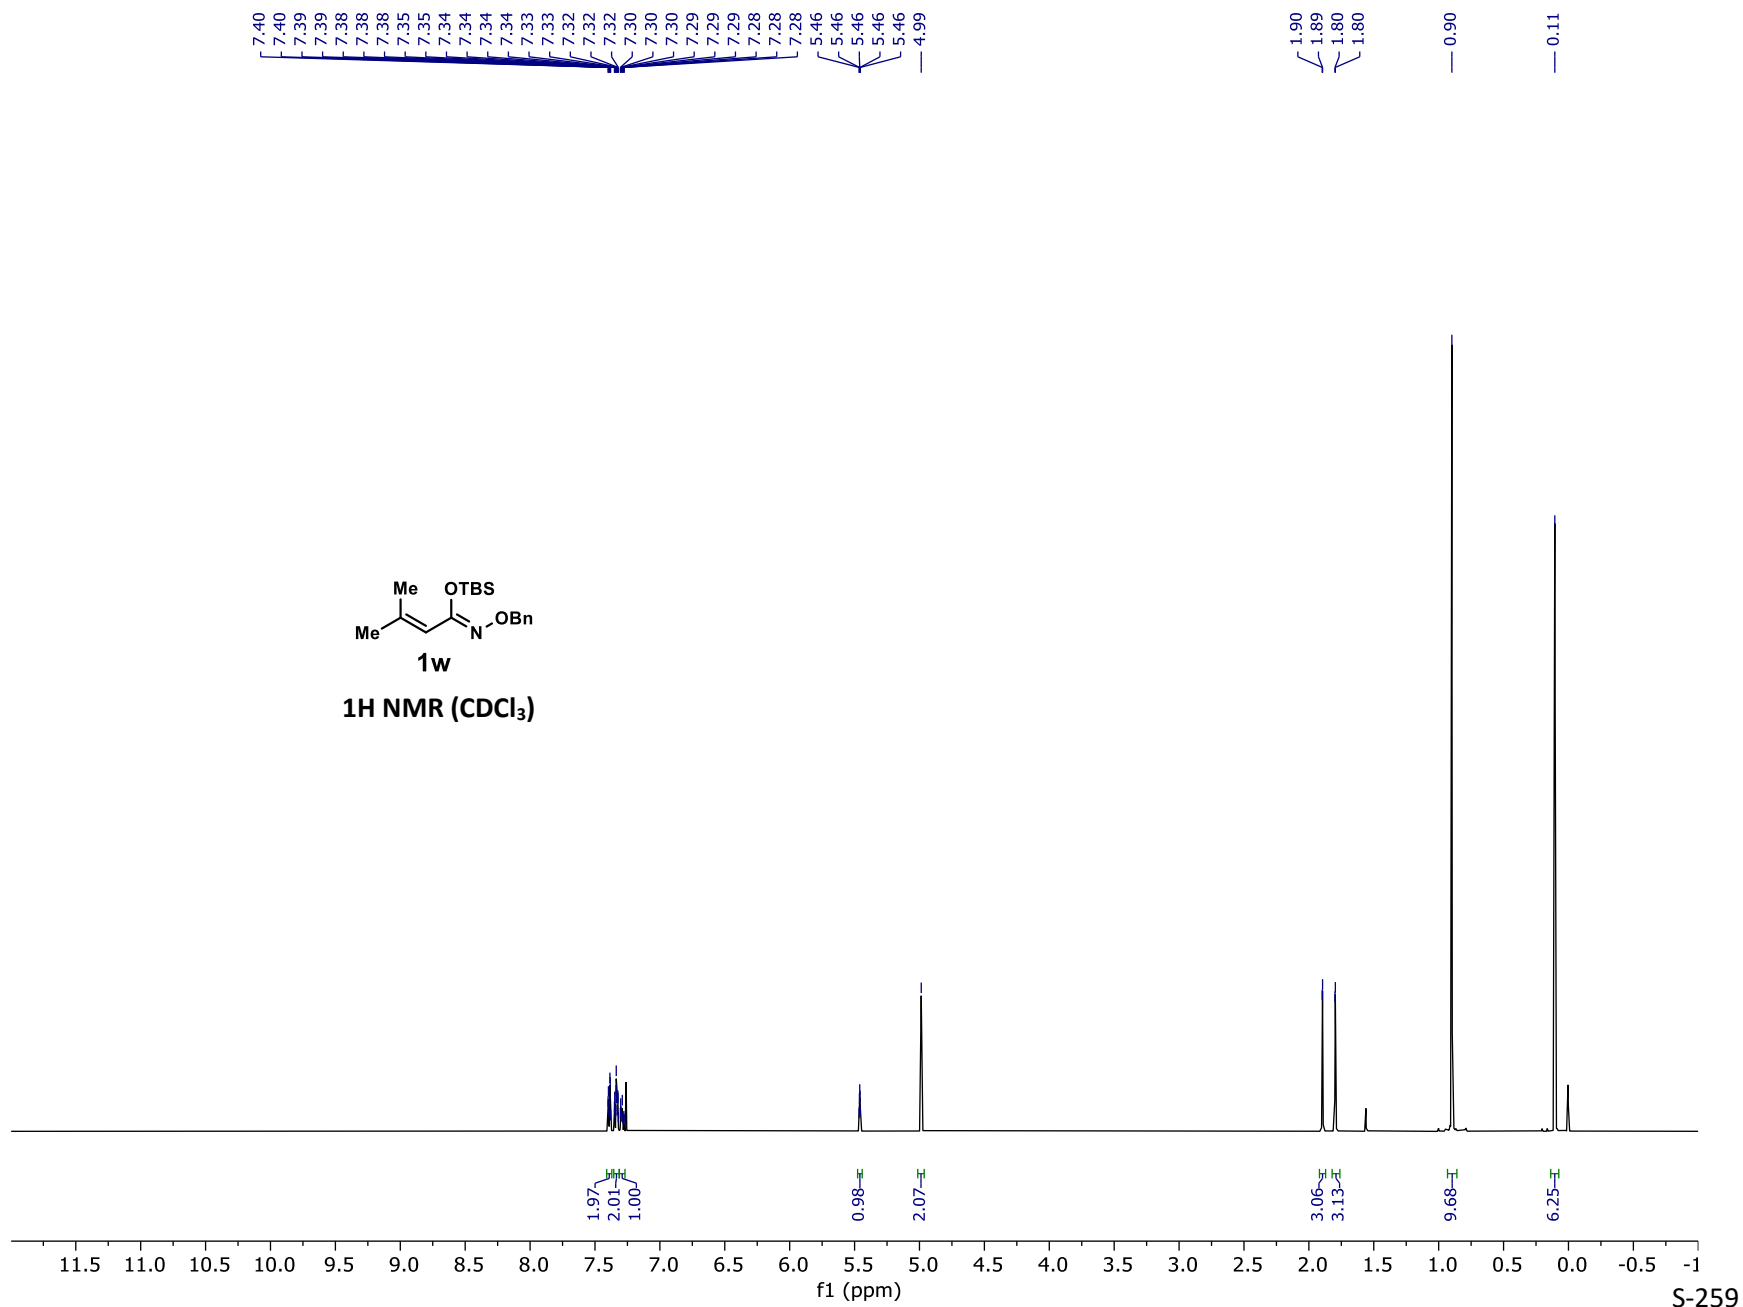

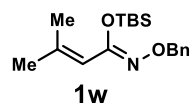

<sup>13</sup>C NMR (CDCl<sub>3</sub>)

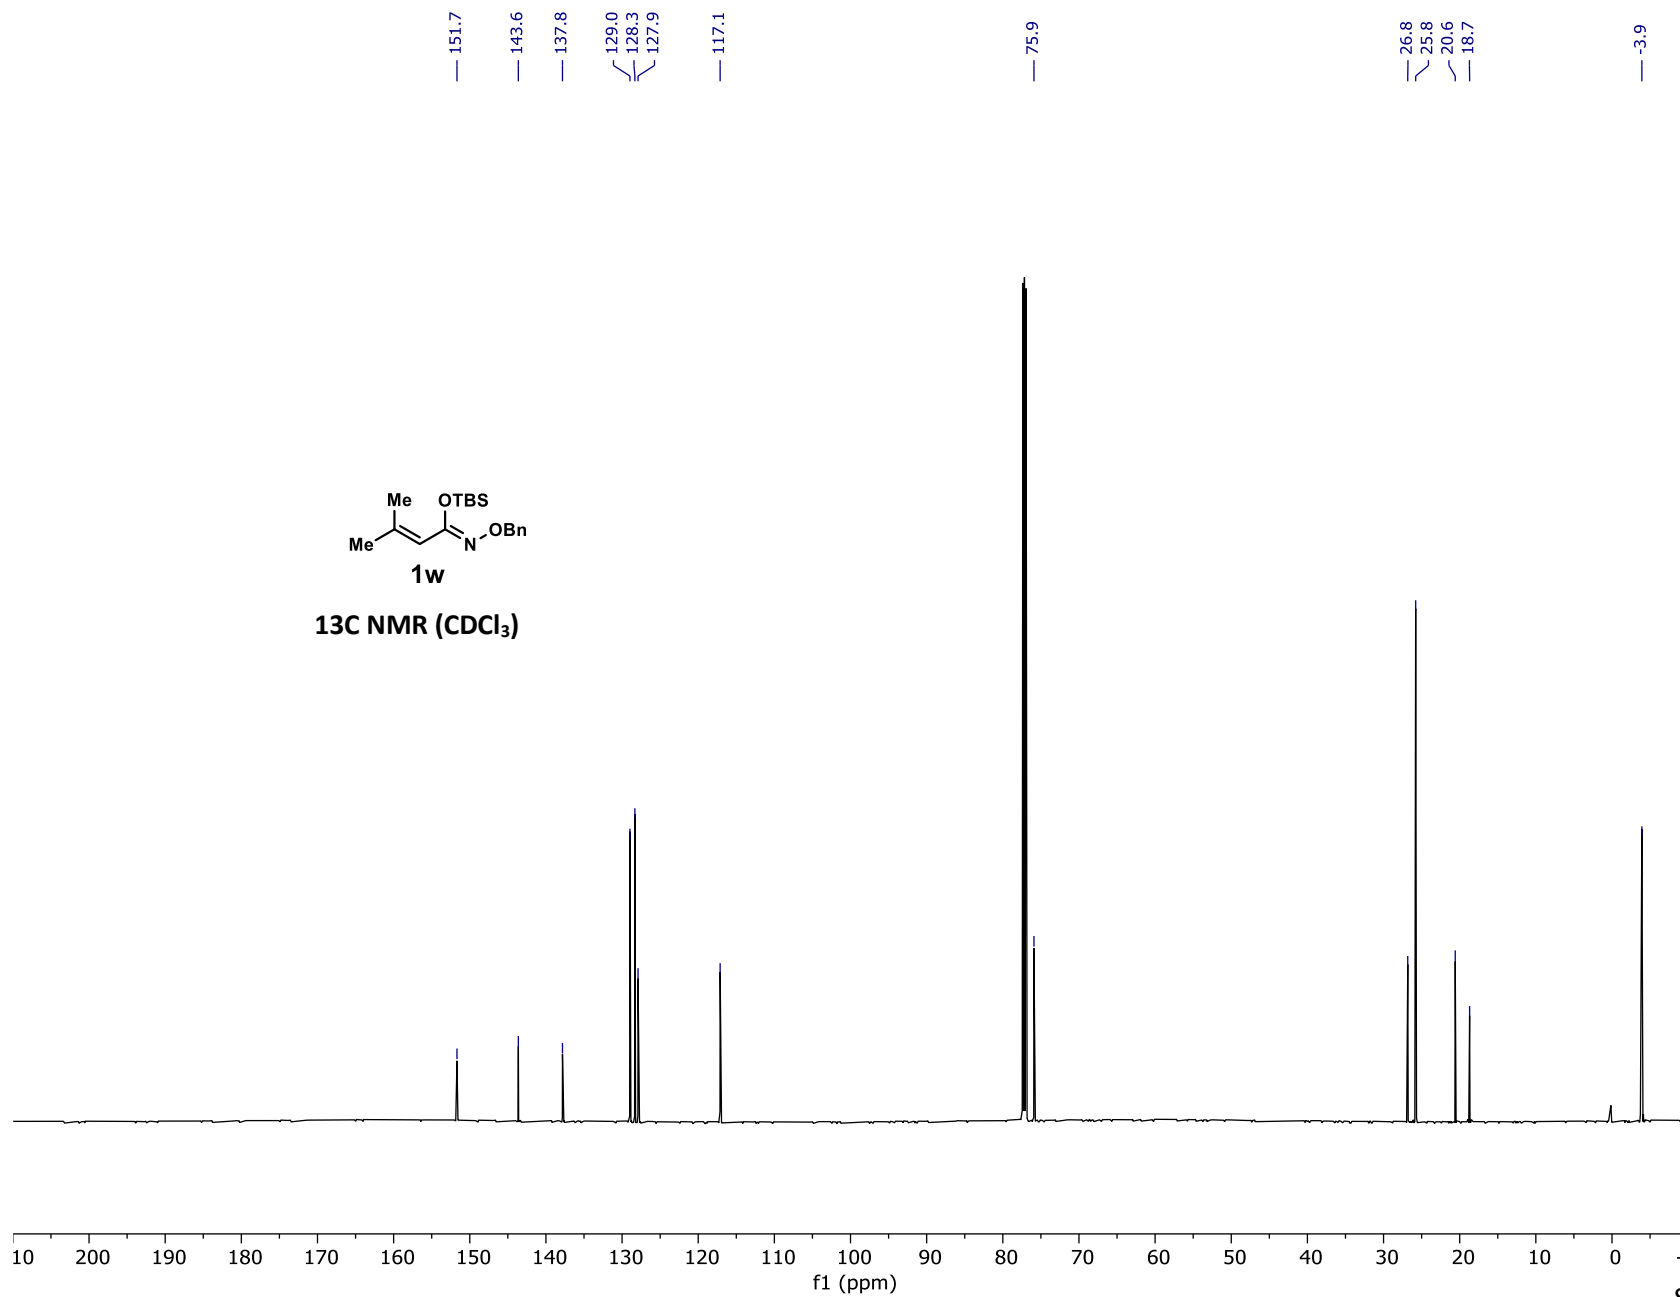



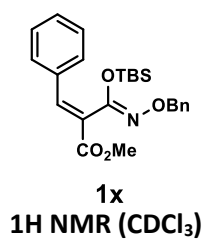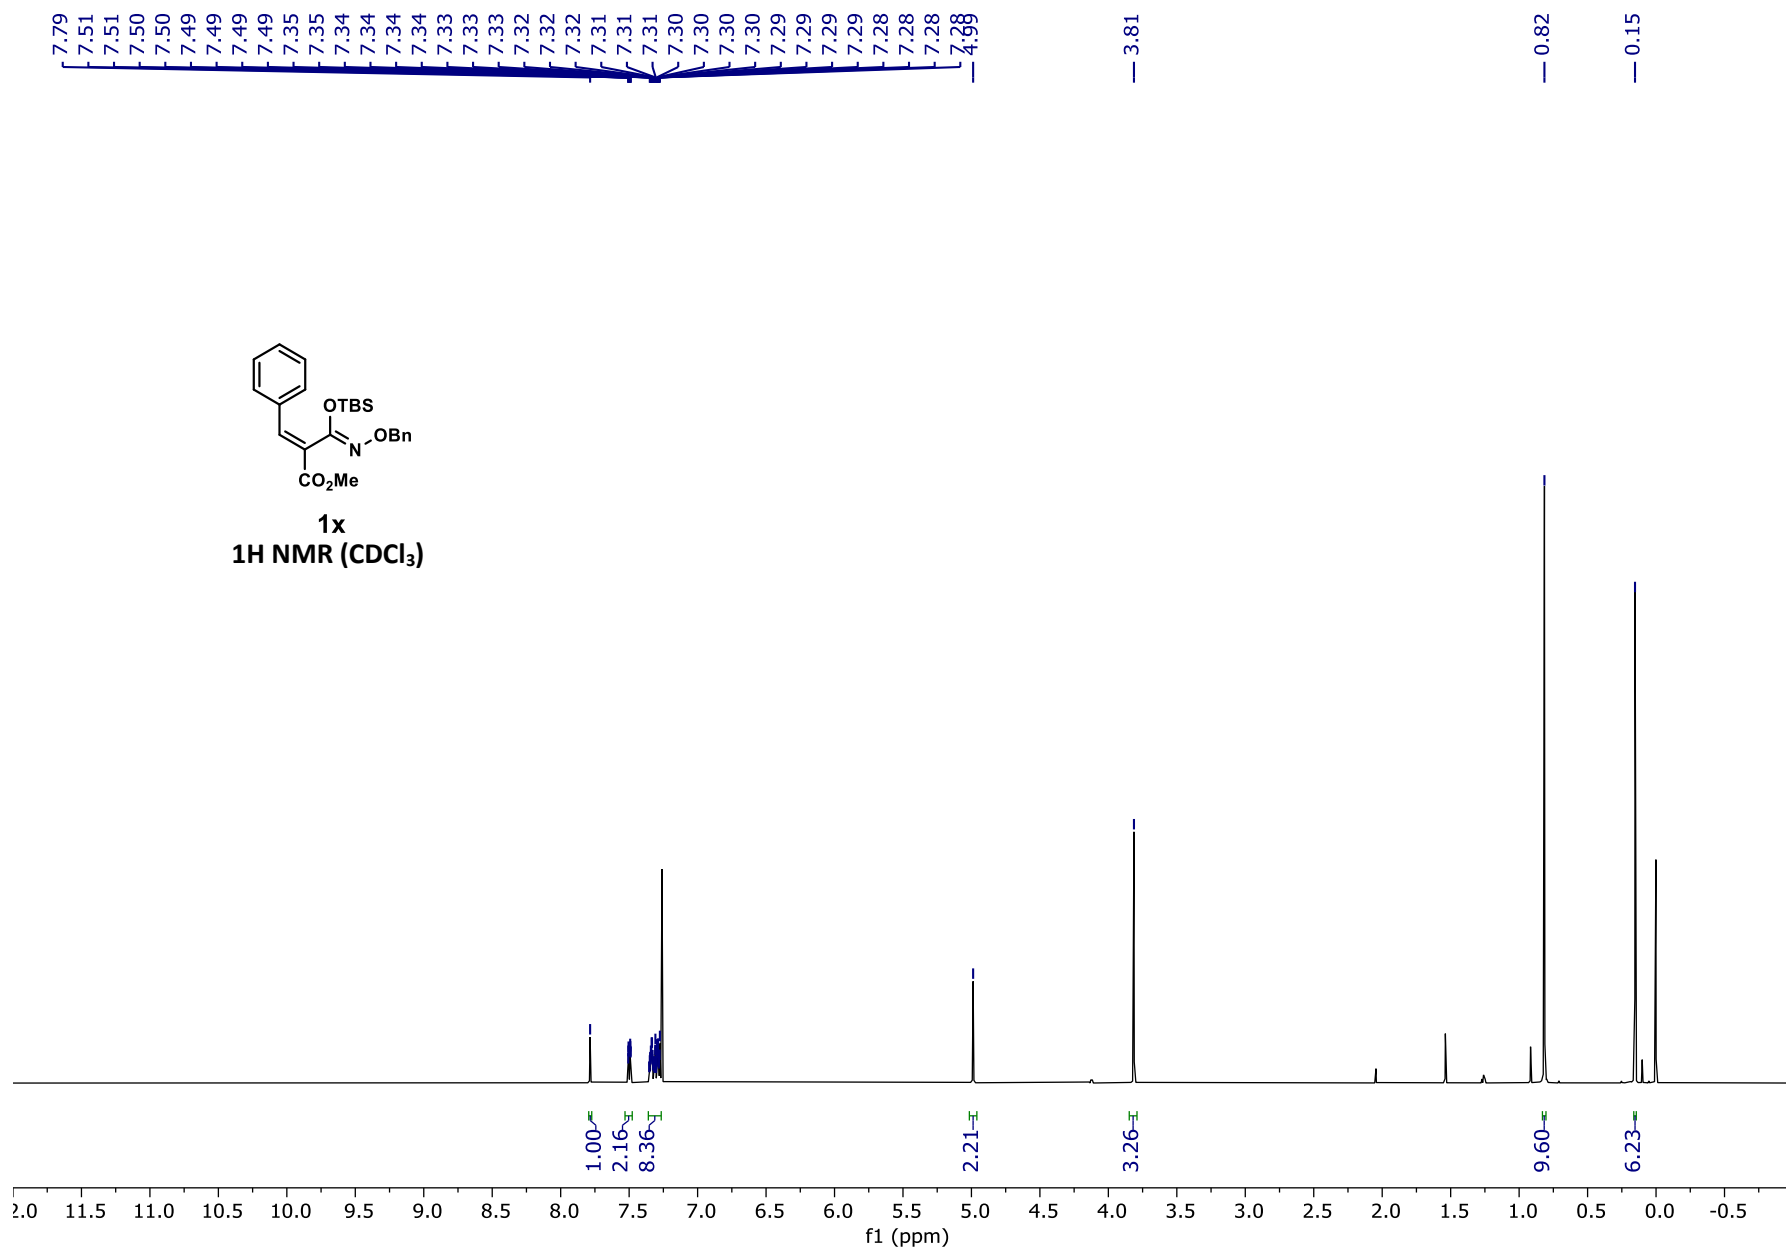

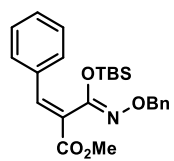

1x

<sup>13</sup>C NMR (CDCl<sub>3</sub>)

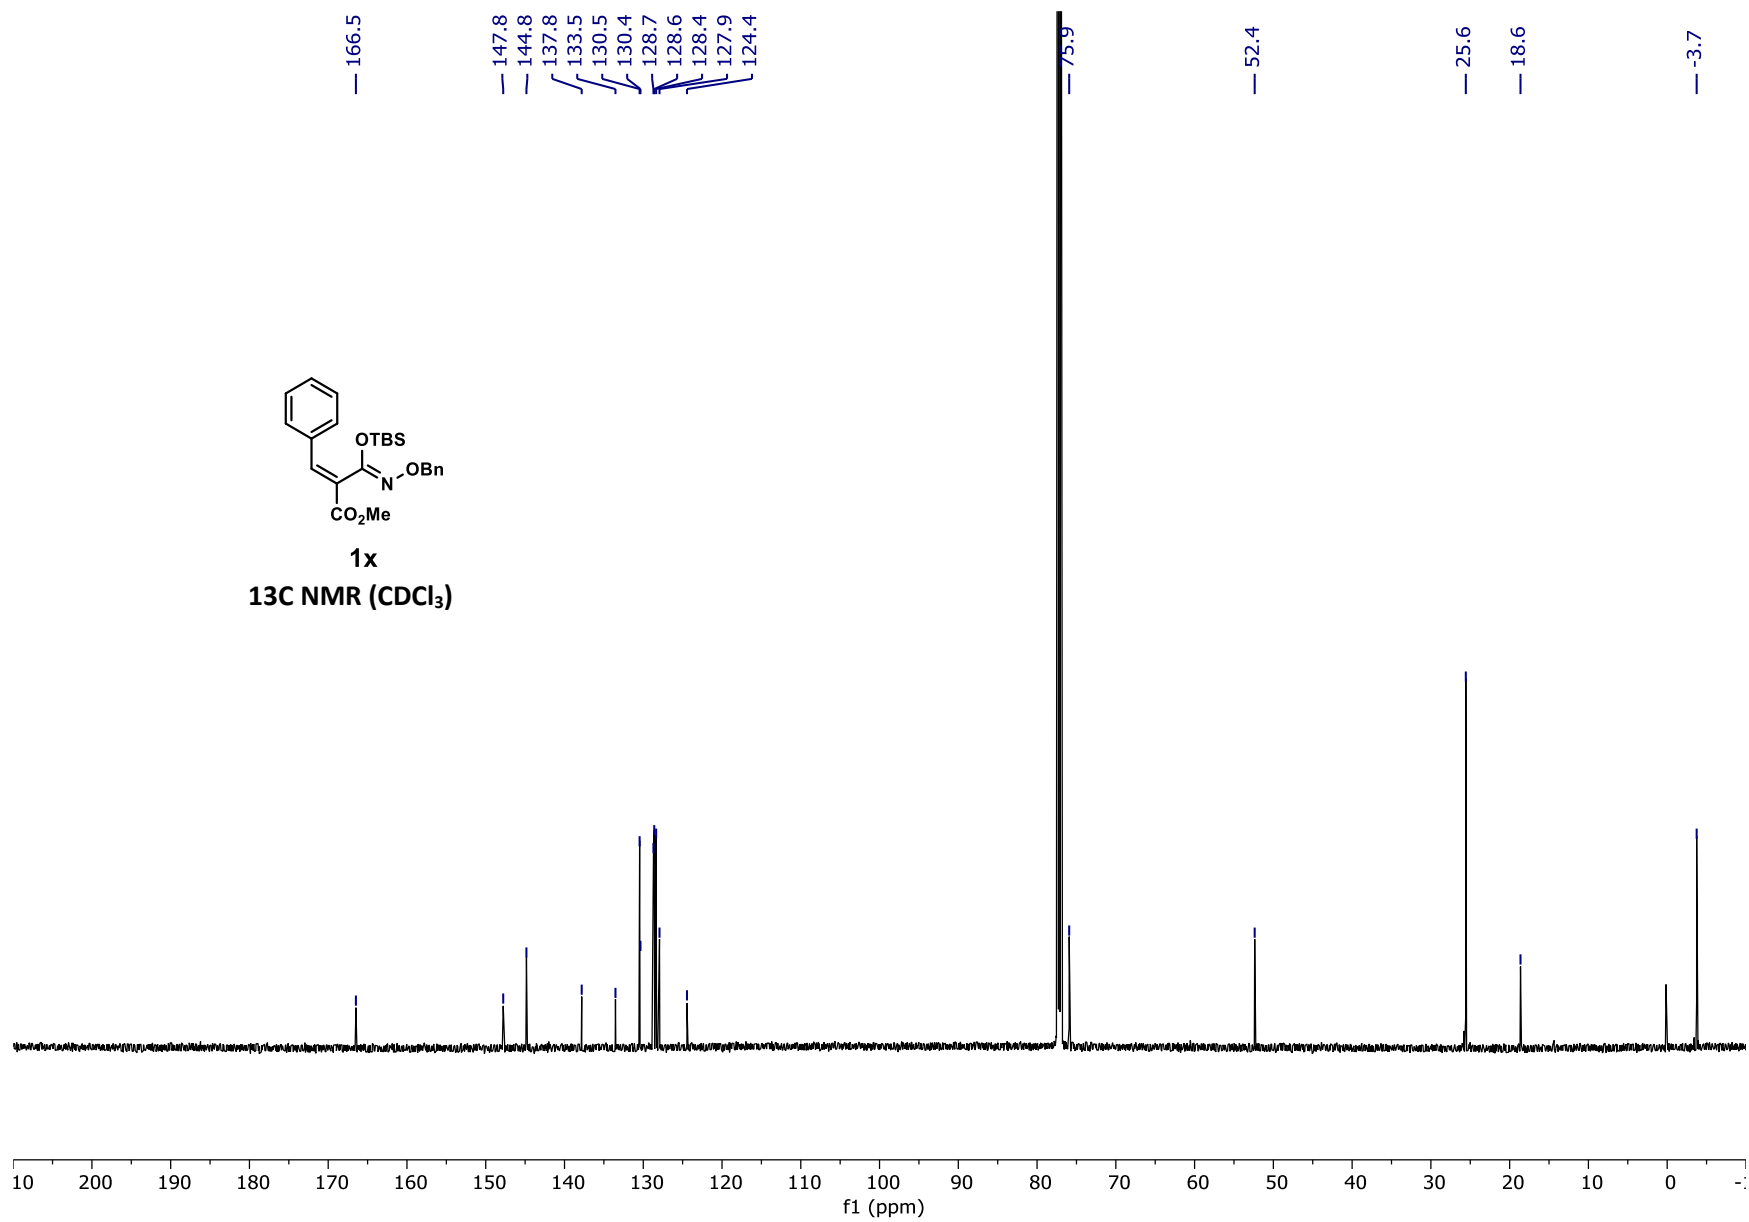

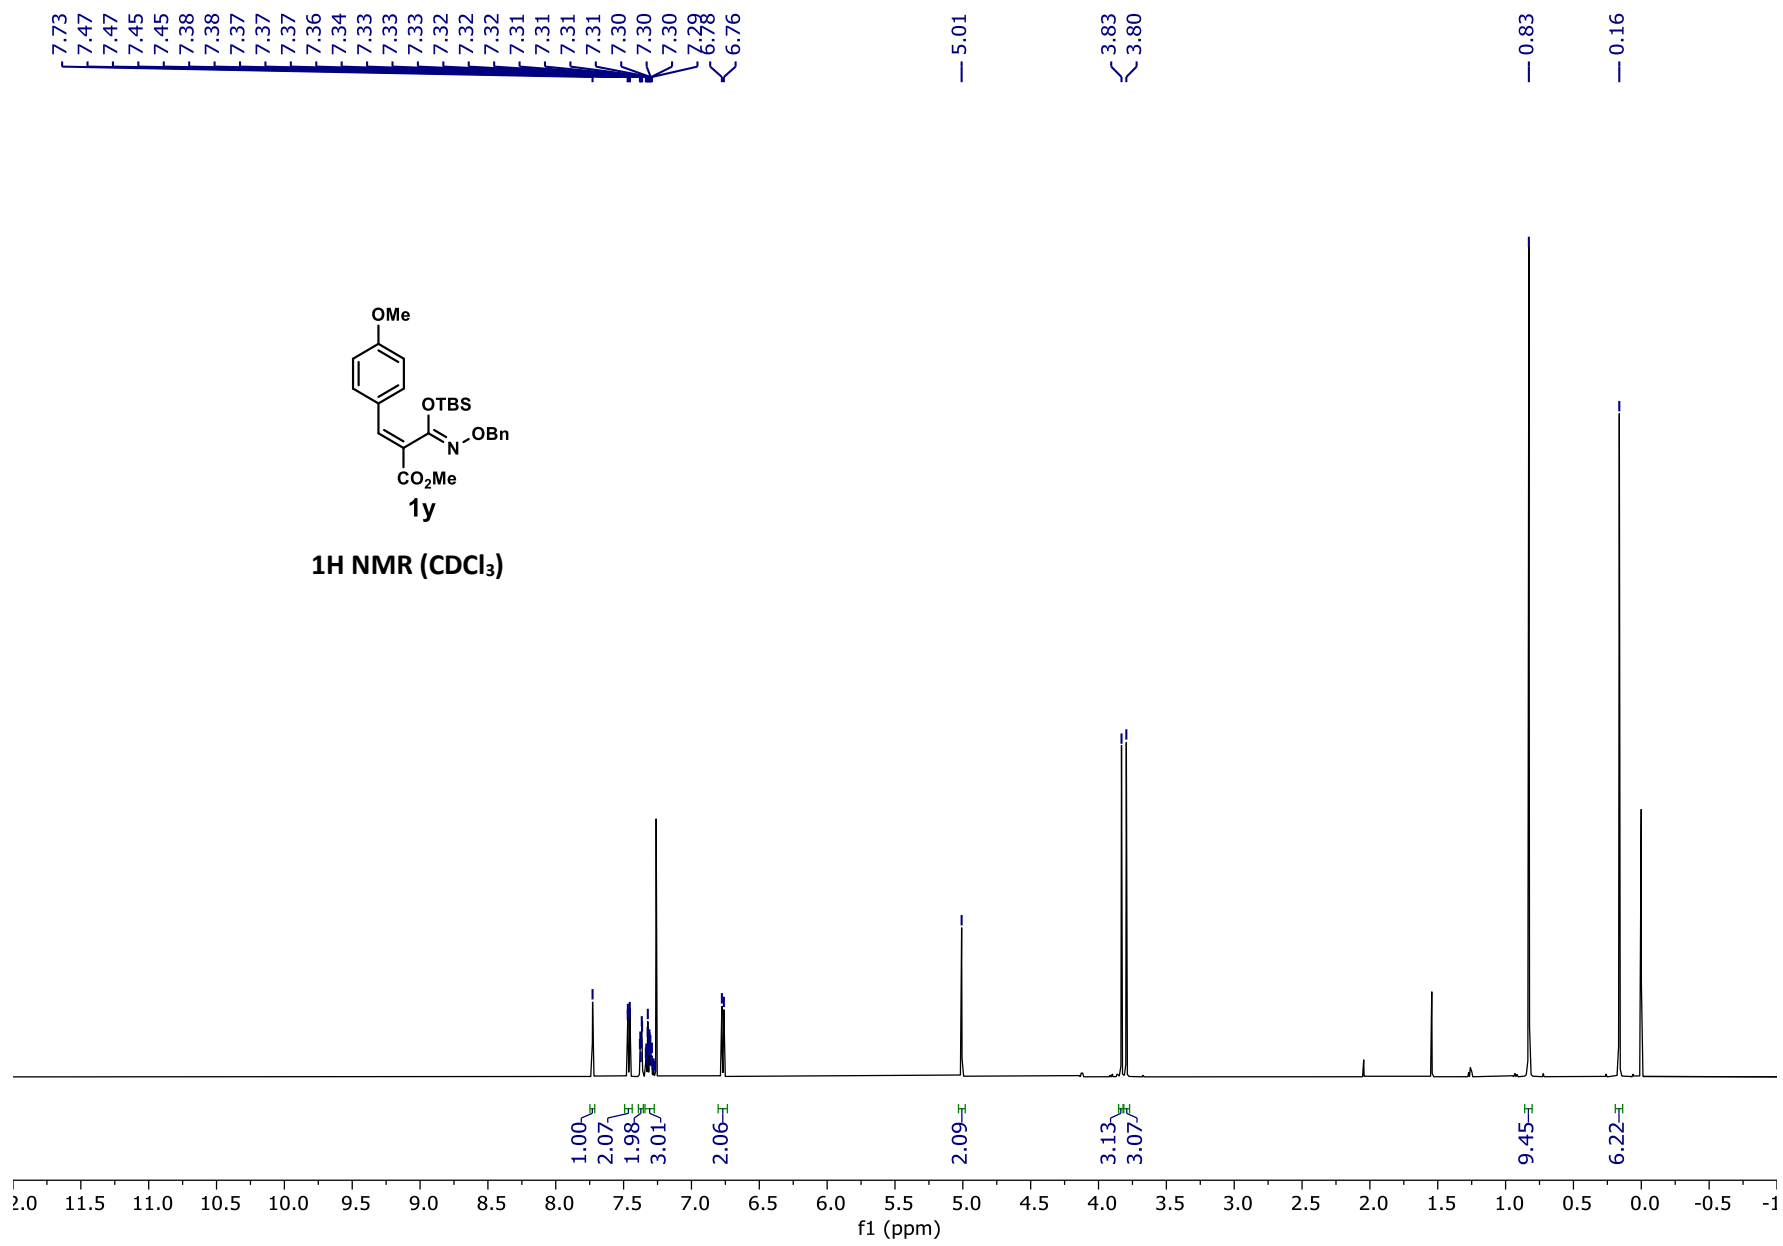

— 166.8  
— 161.5  
— 148.1  
— 144.6  
— 138.0  
— 132.6  
— 128.8  
— 128.4  
— 127.9  
— 126.1  
— 121.6  
— 114.1

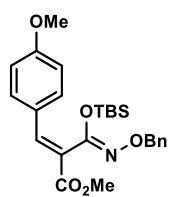

**1y**

**<sup>13</sup>C NMR (CDCl<sub>3</sub>)**

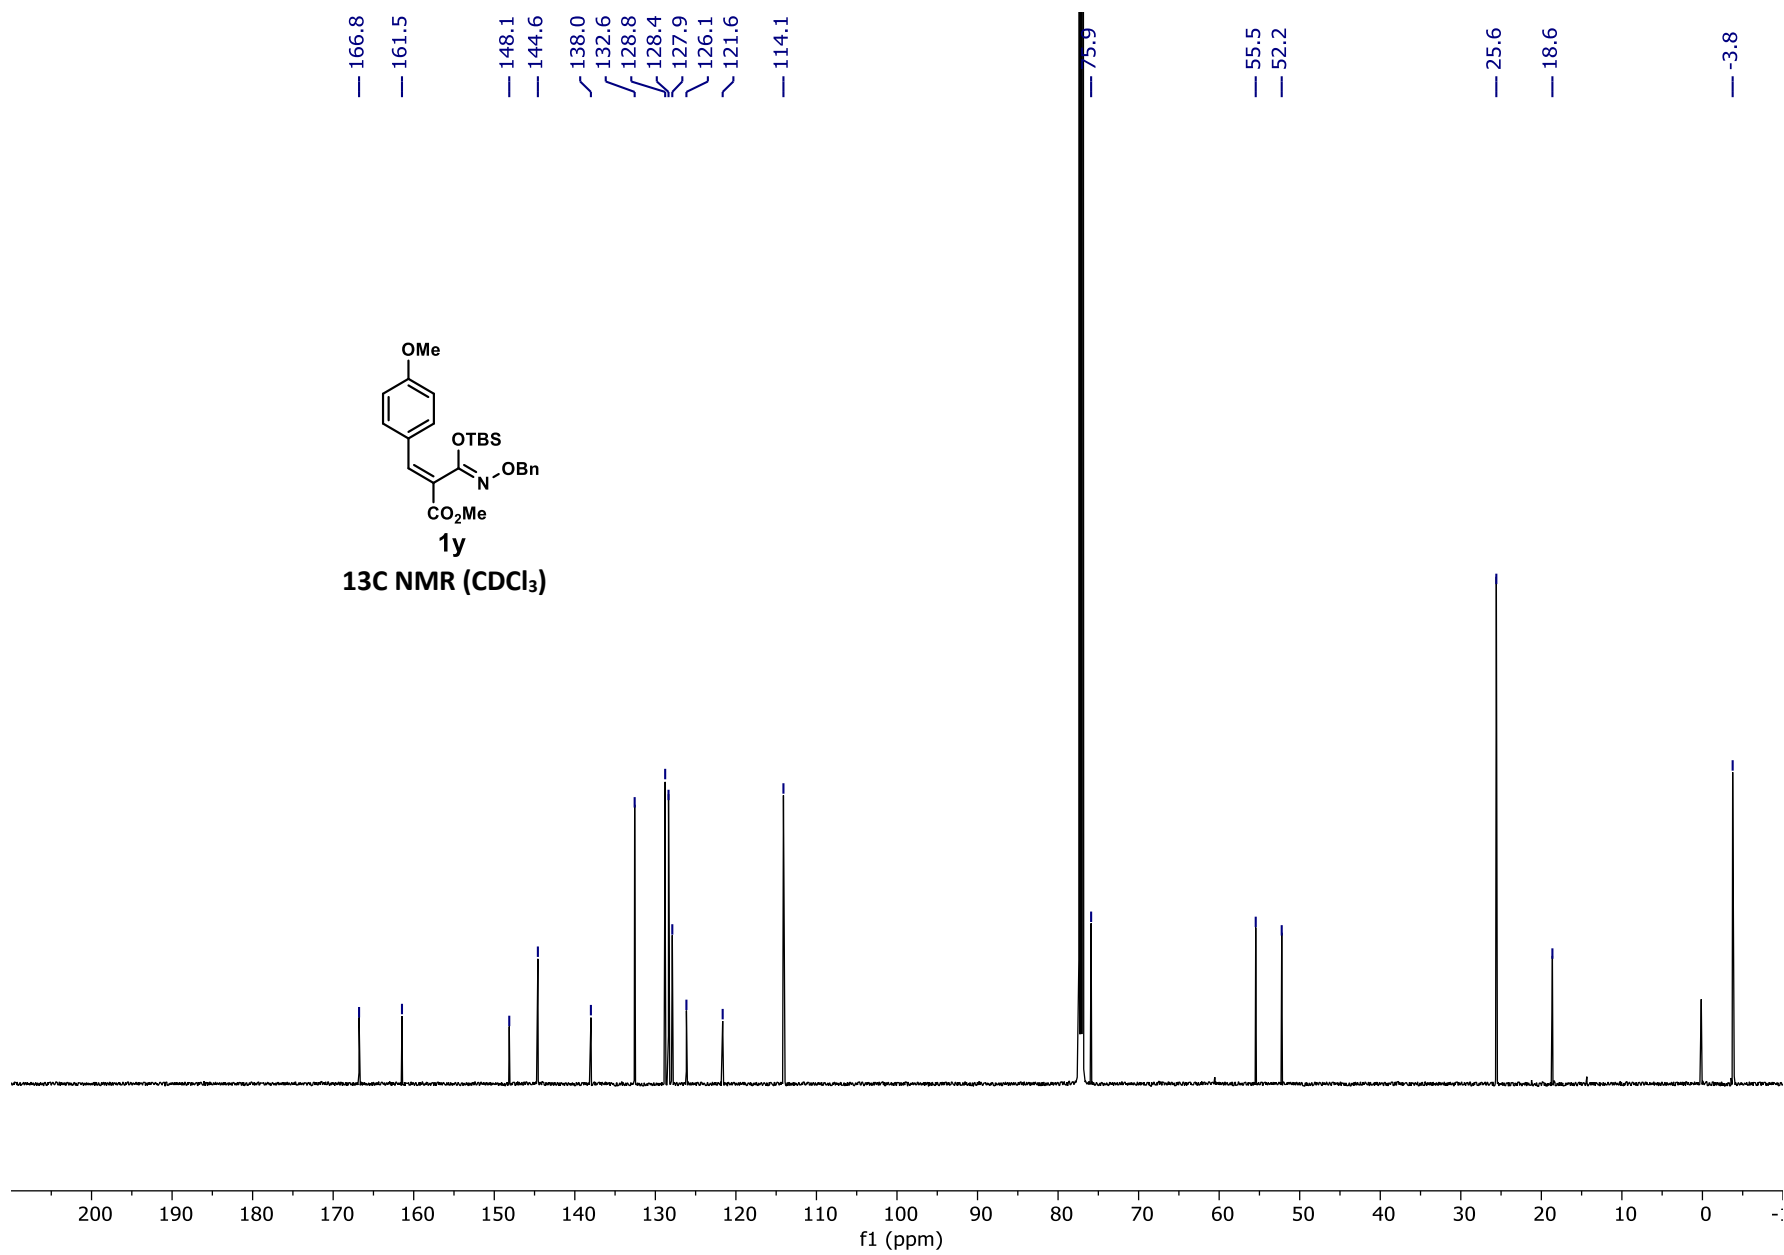

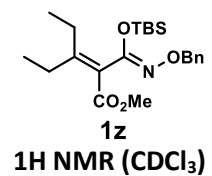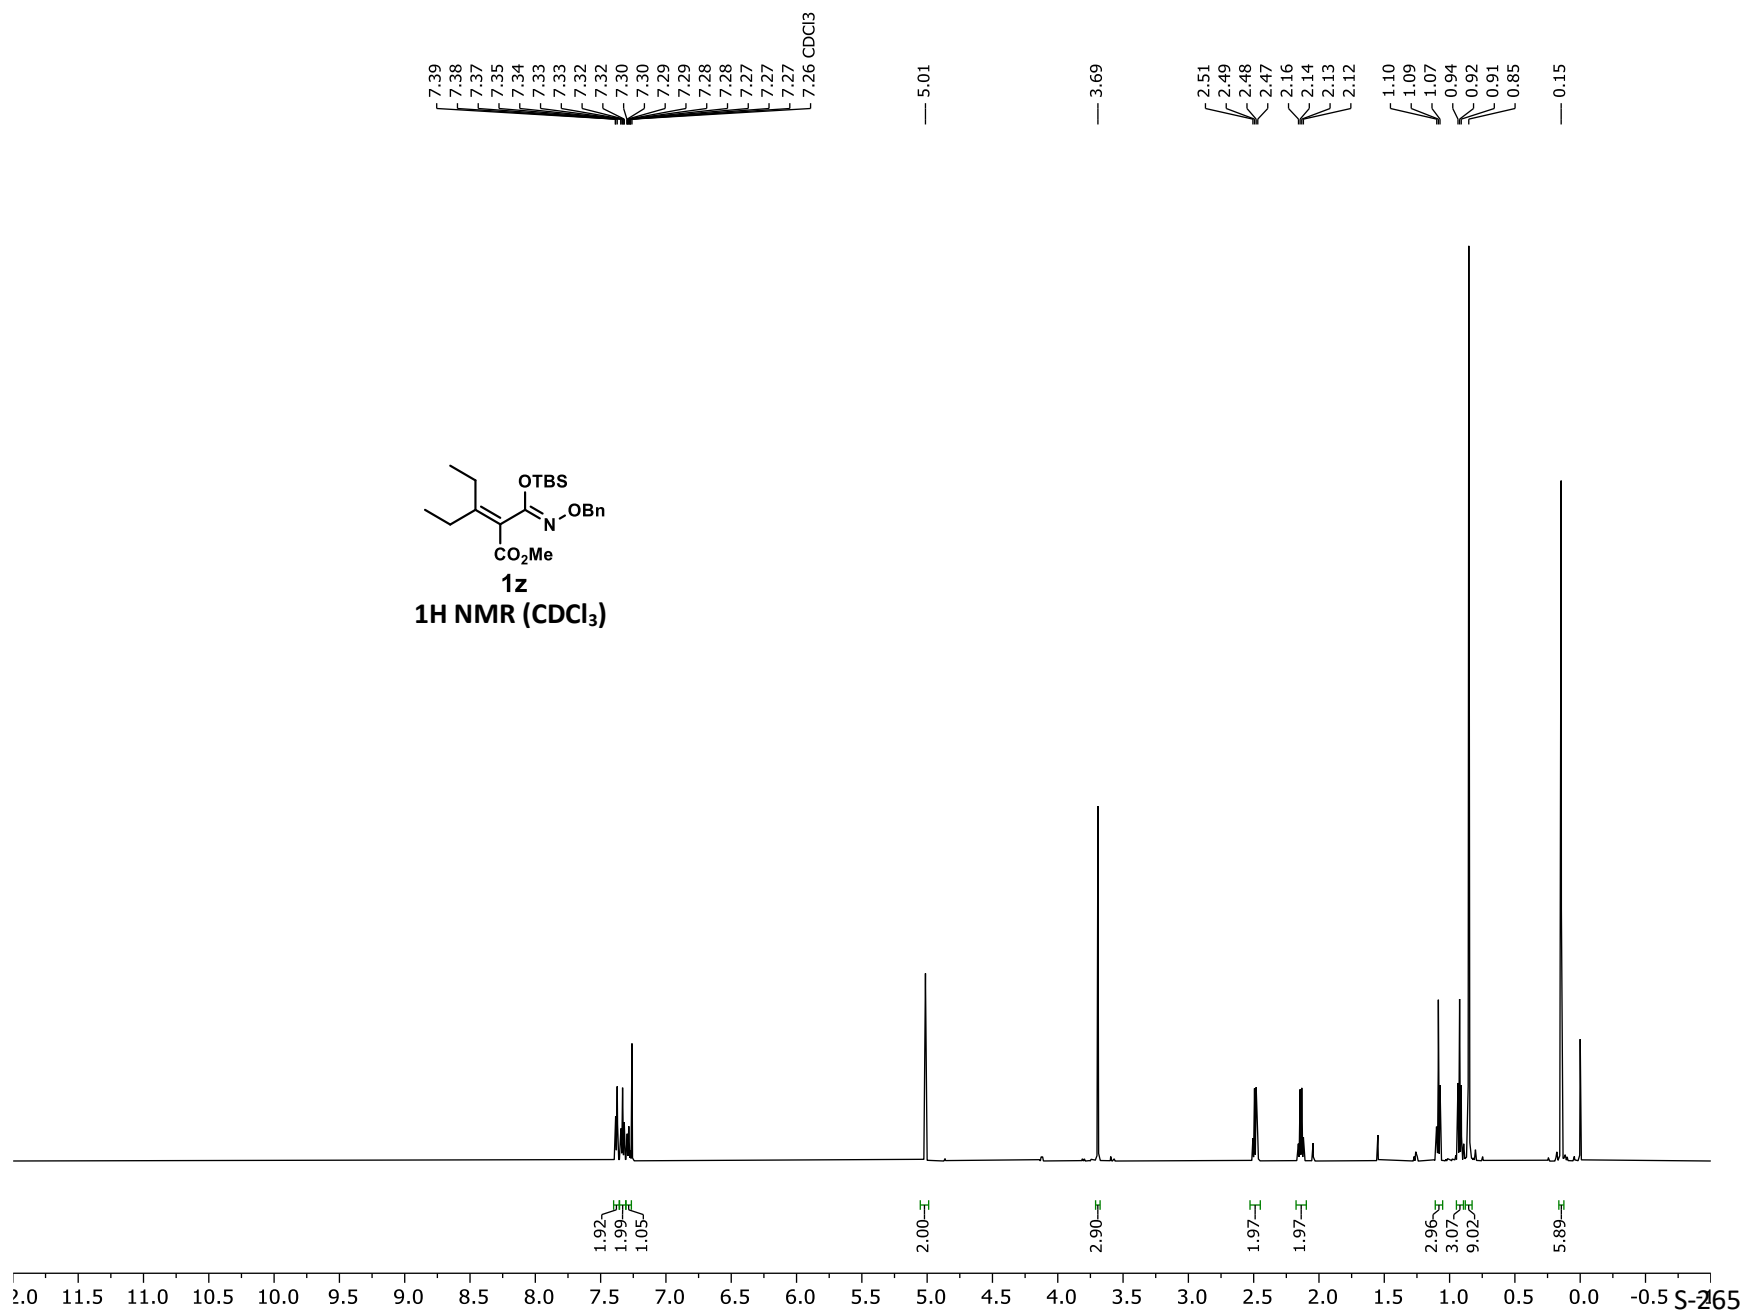

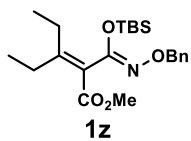

**<sup>13</sup>C NMR (CDCl<sub>3</sub>)**

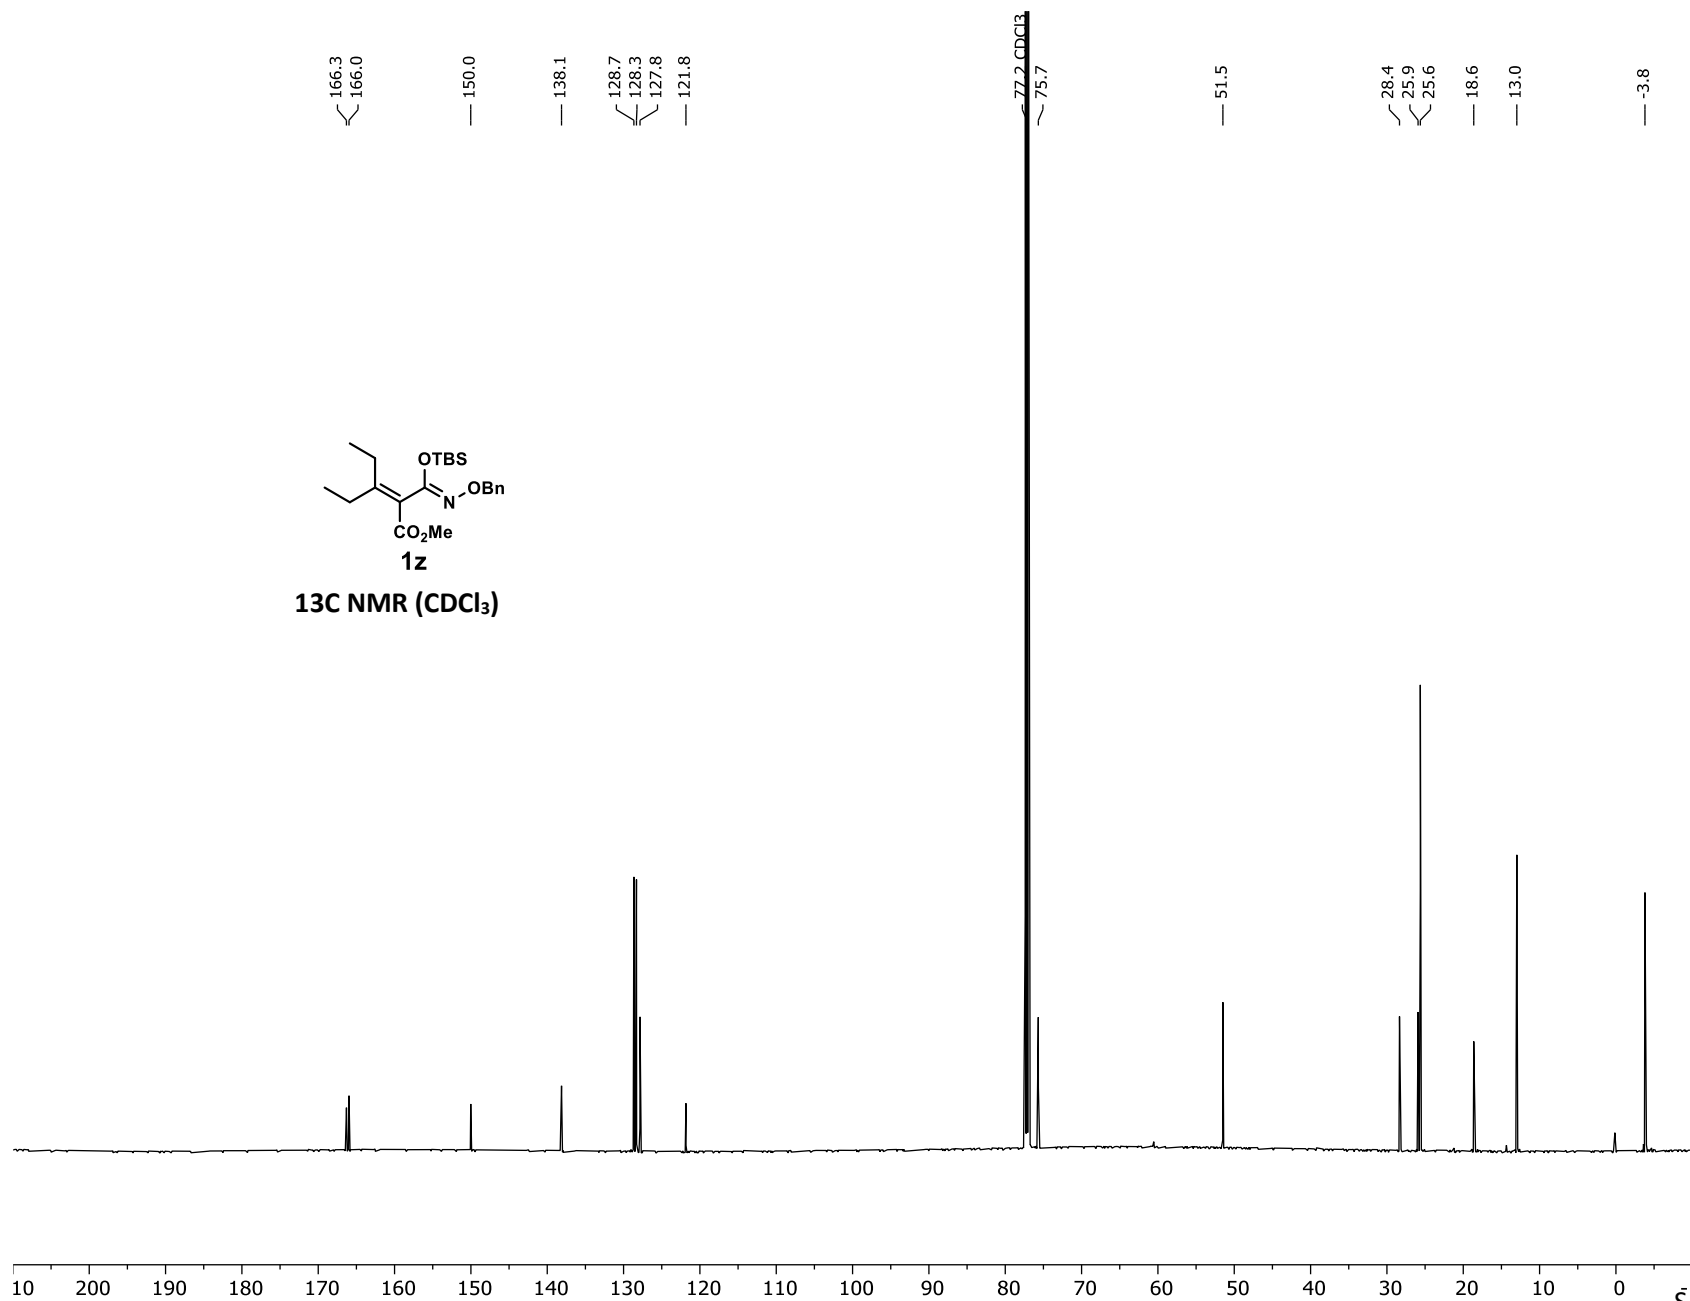

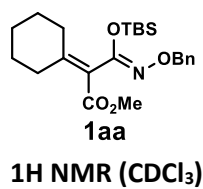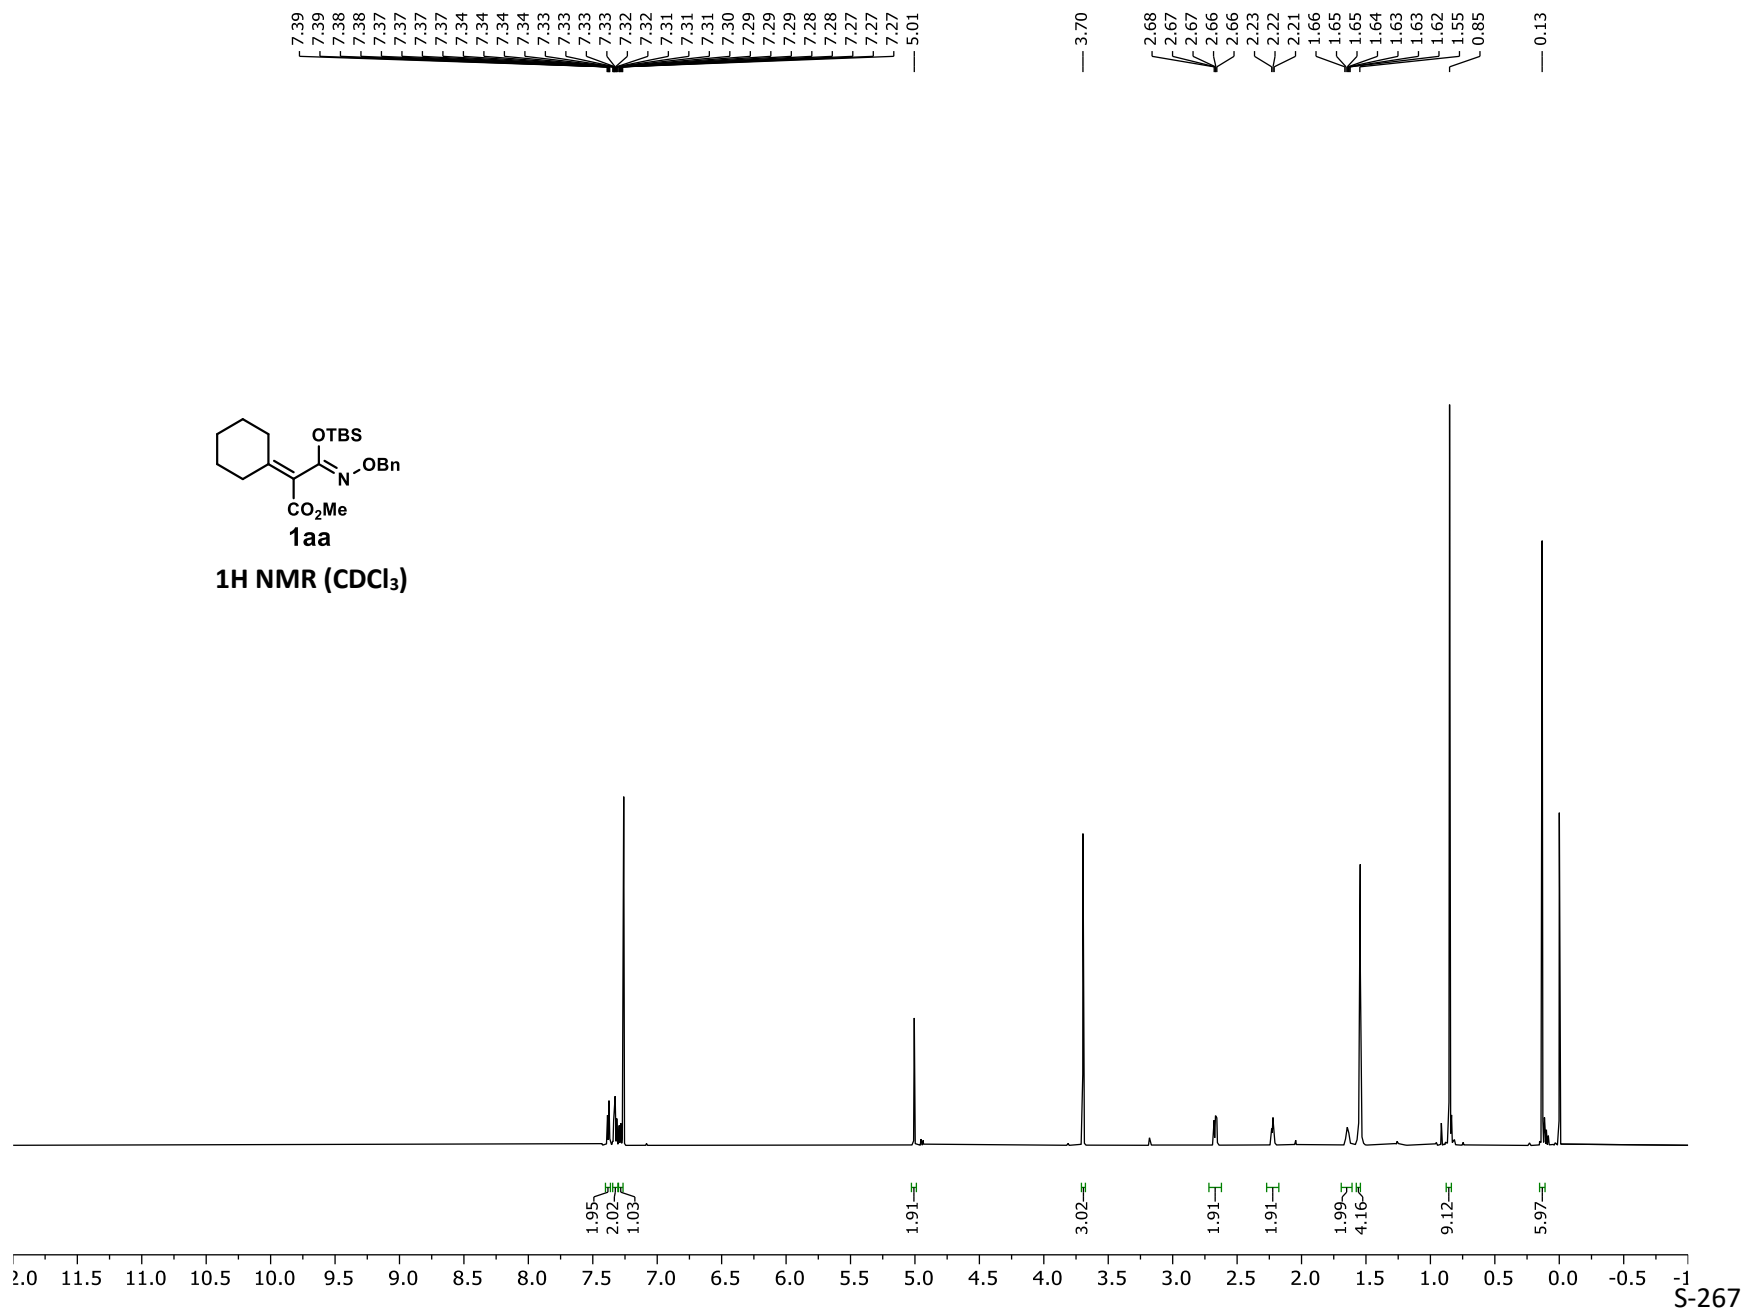

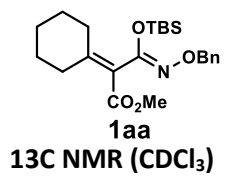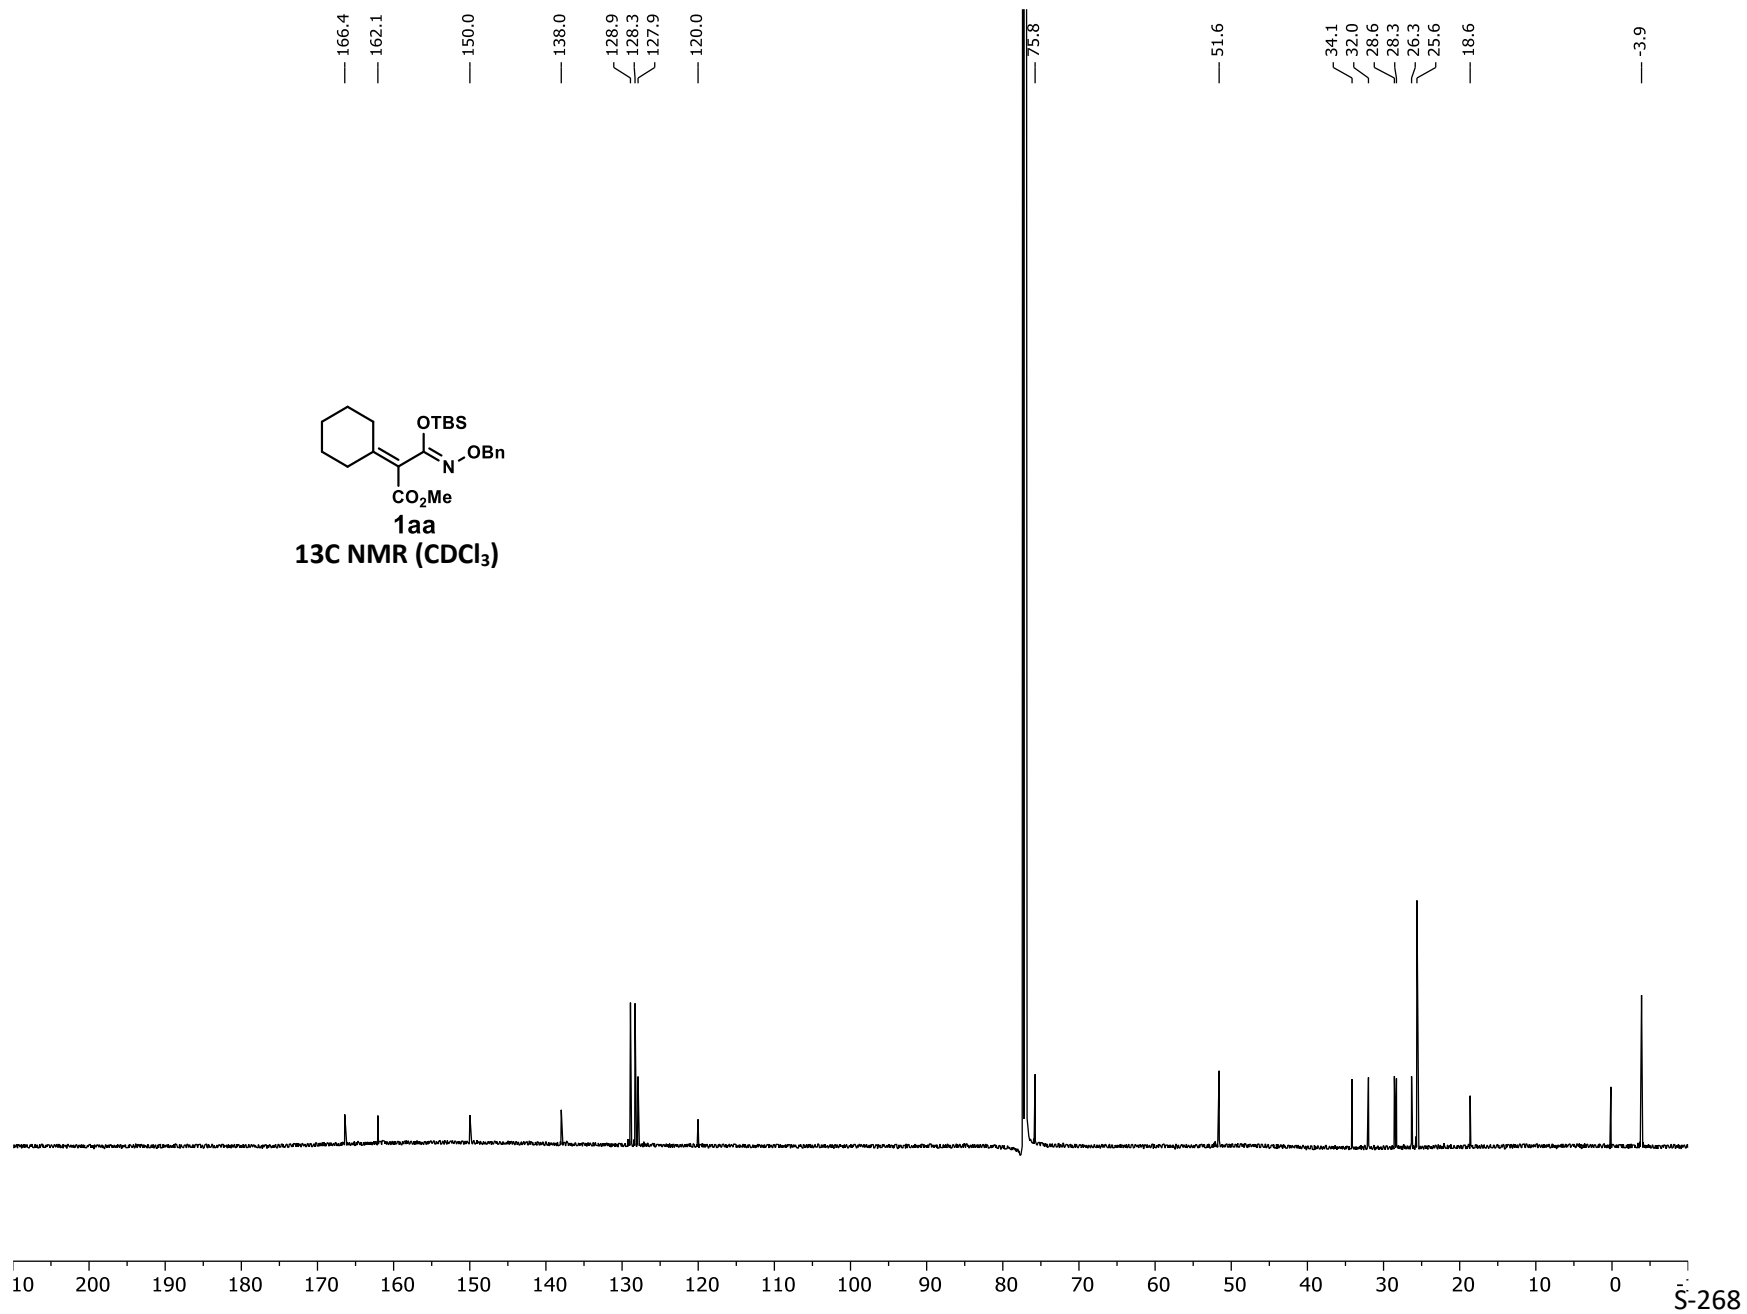



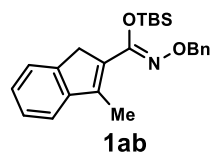

**<sup>1</sup>H NMR (CDCl<sub>3</sub>)**

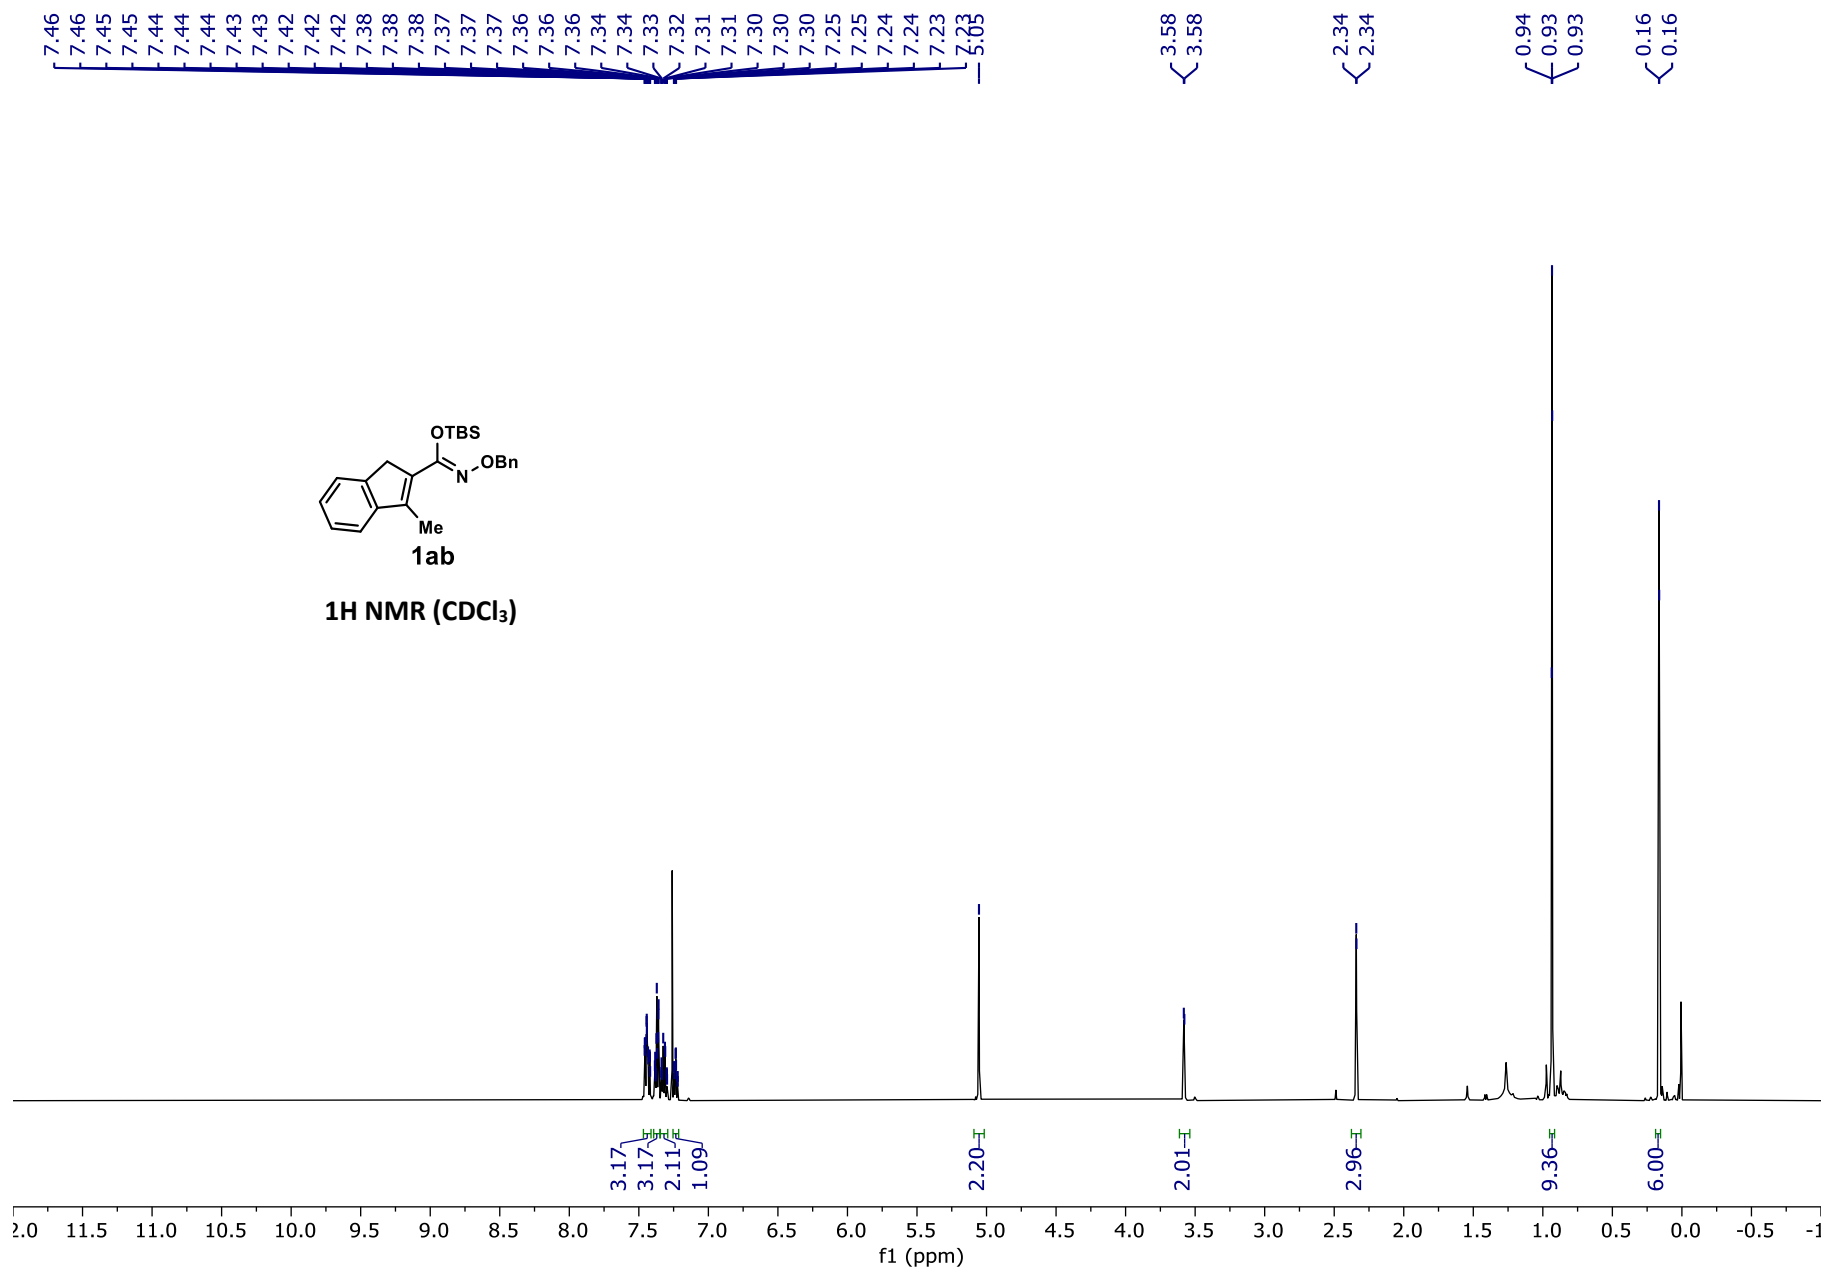

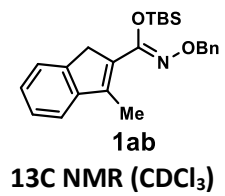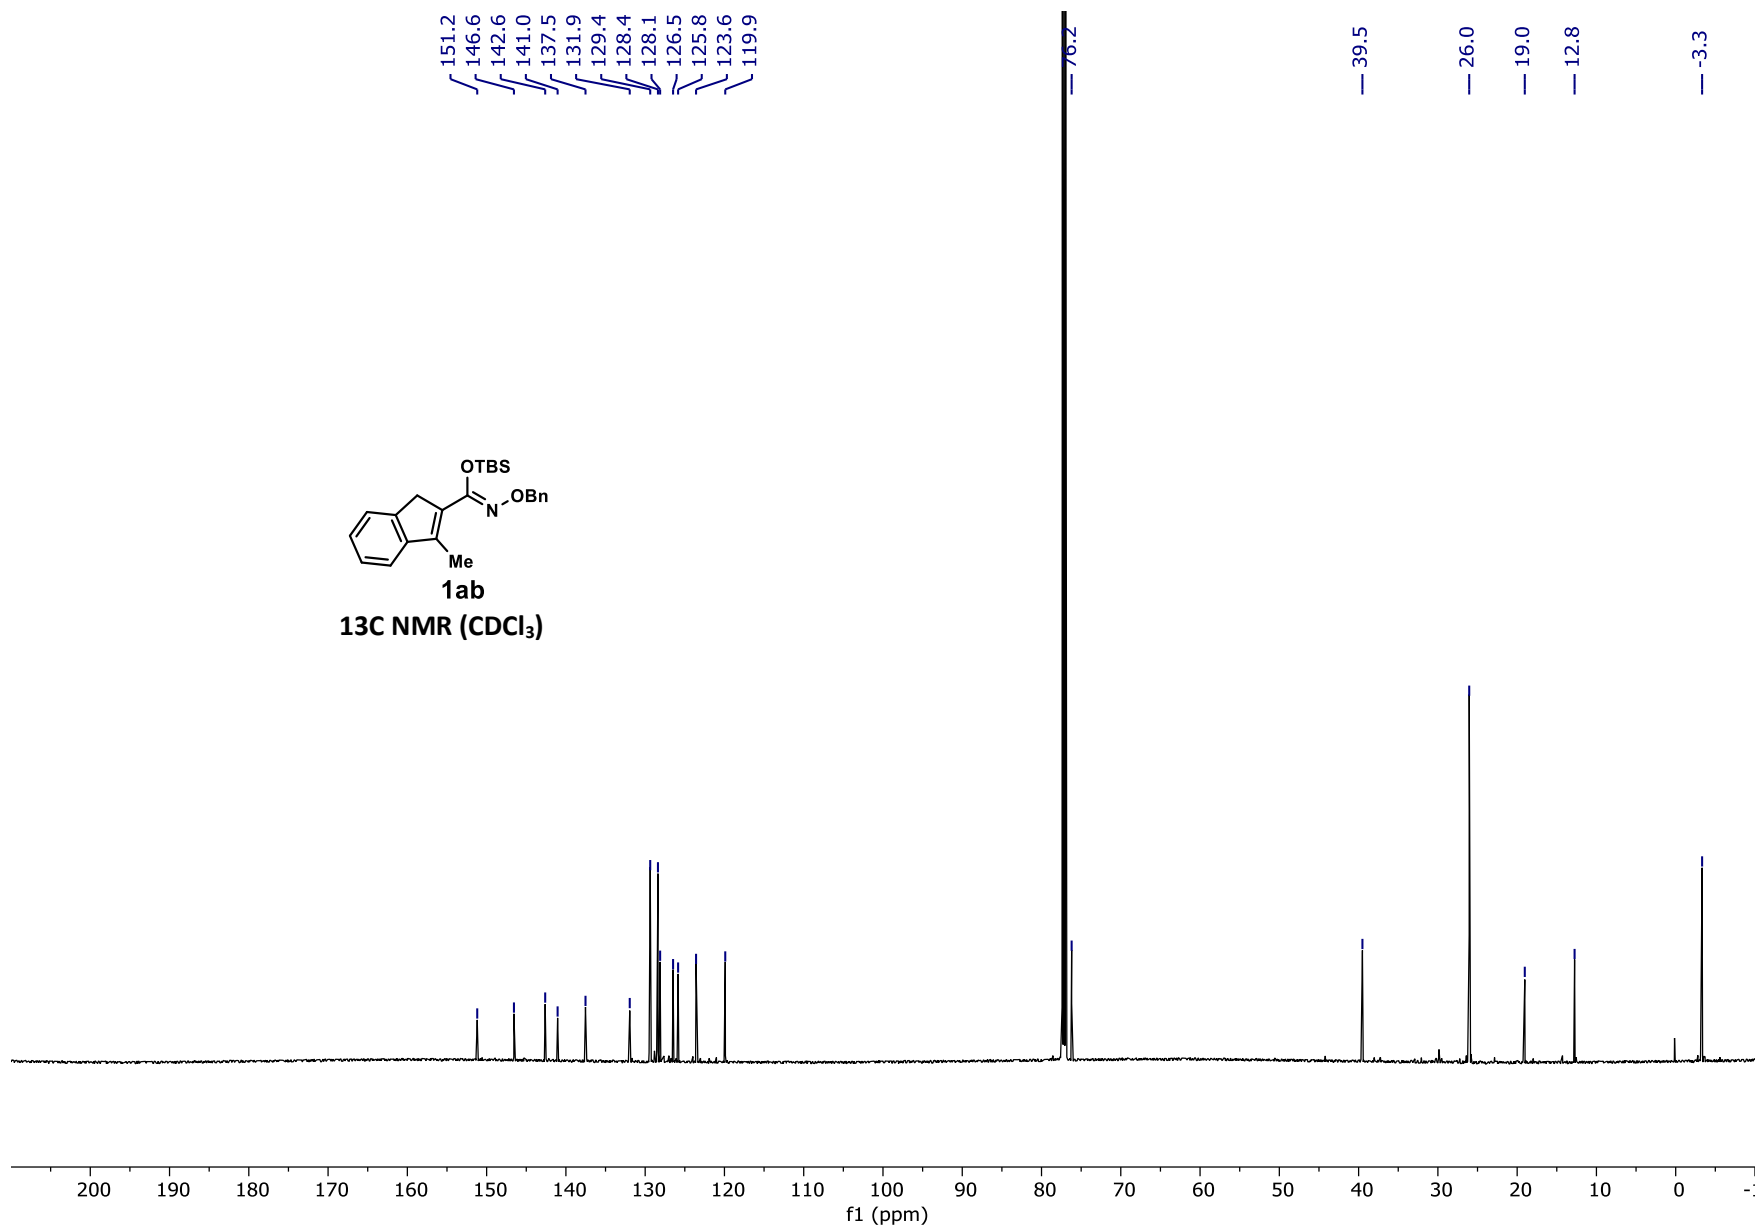

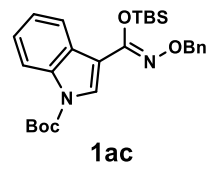

**<sup>1</sup>H NMR (CDCl<sub>3</sub>)**

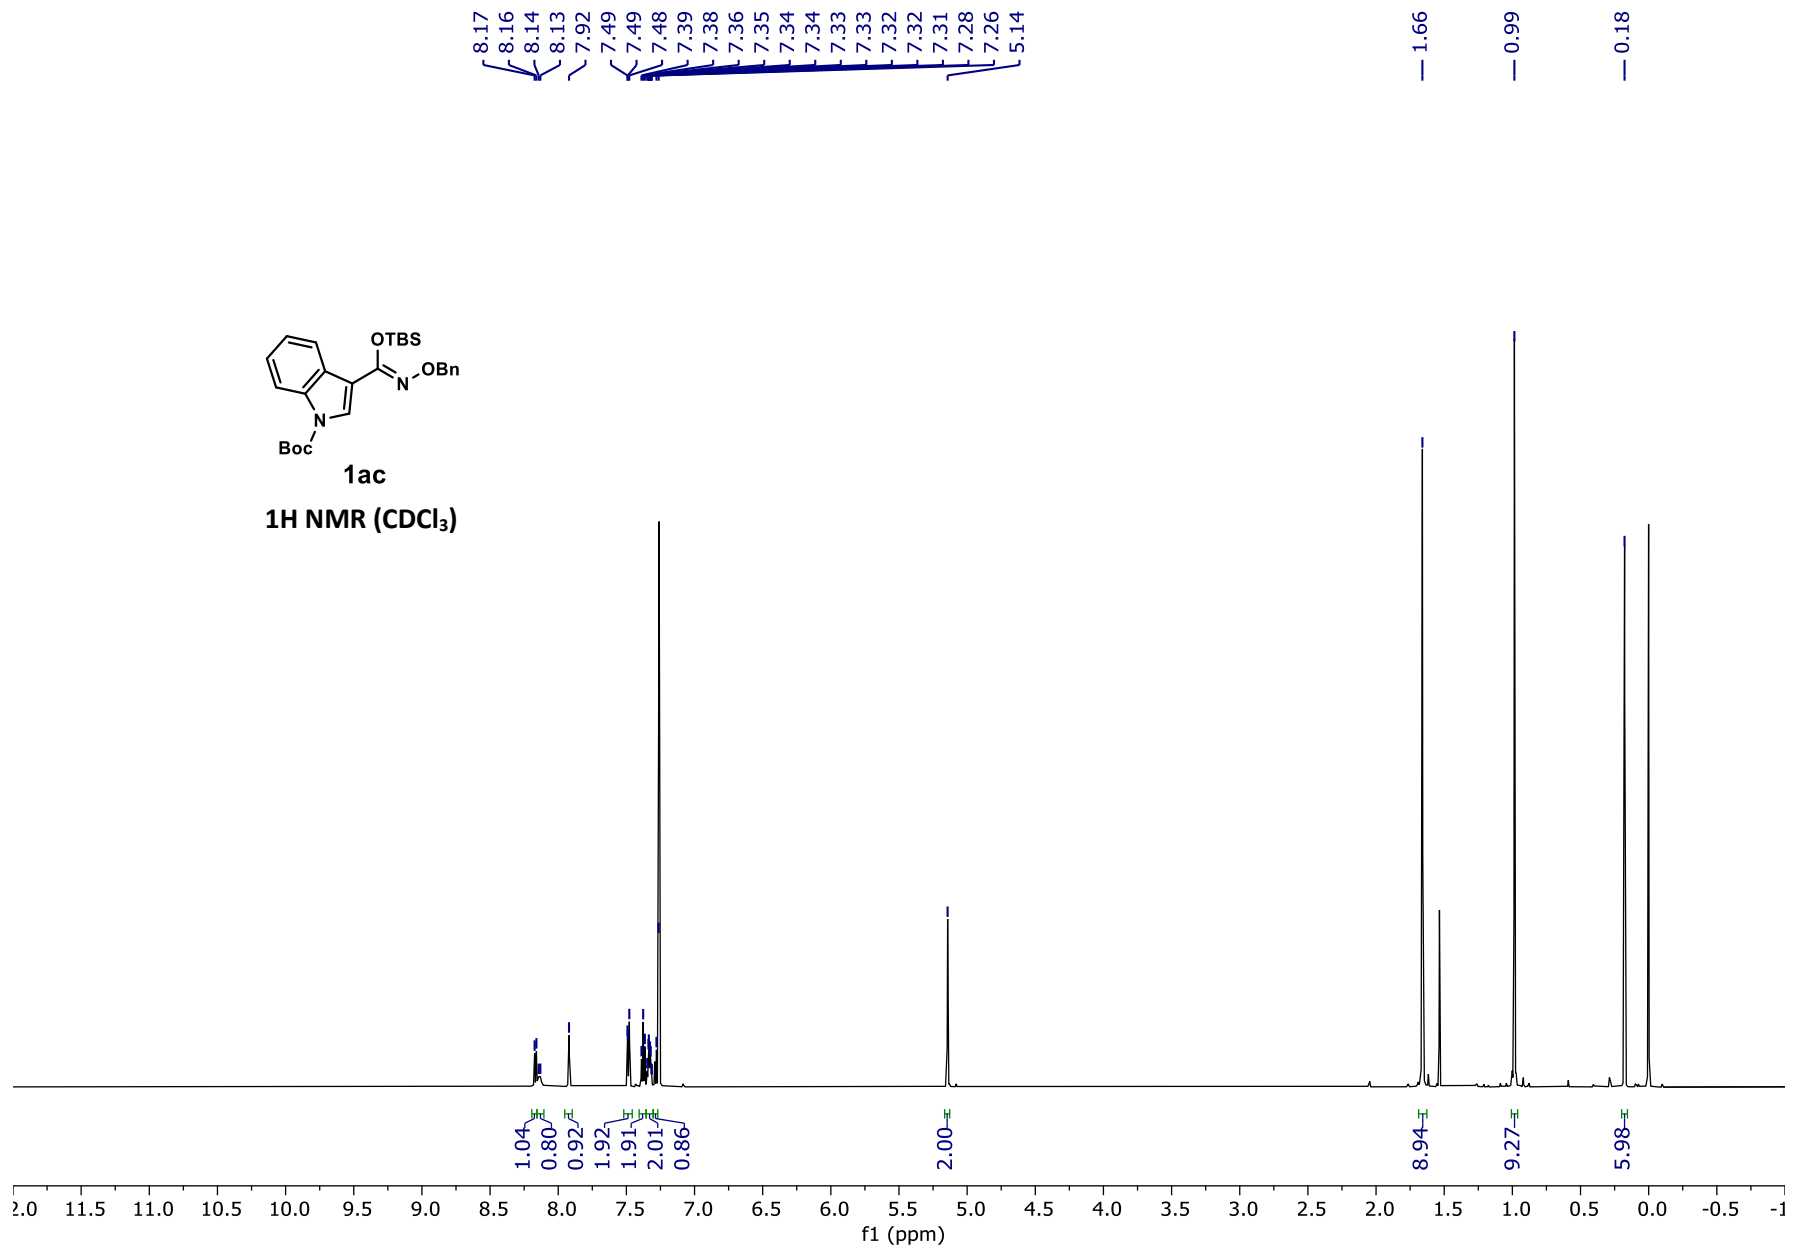

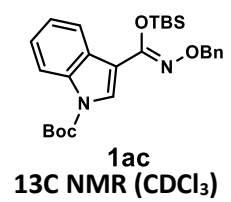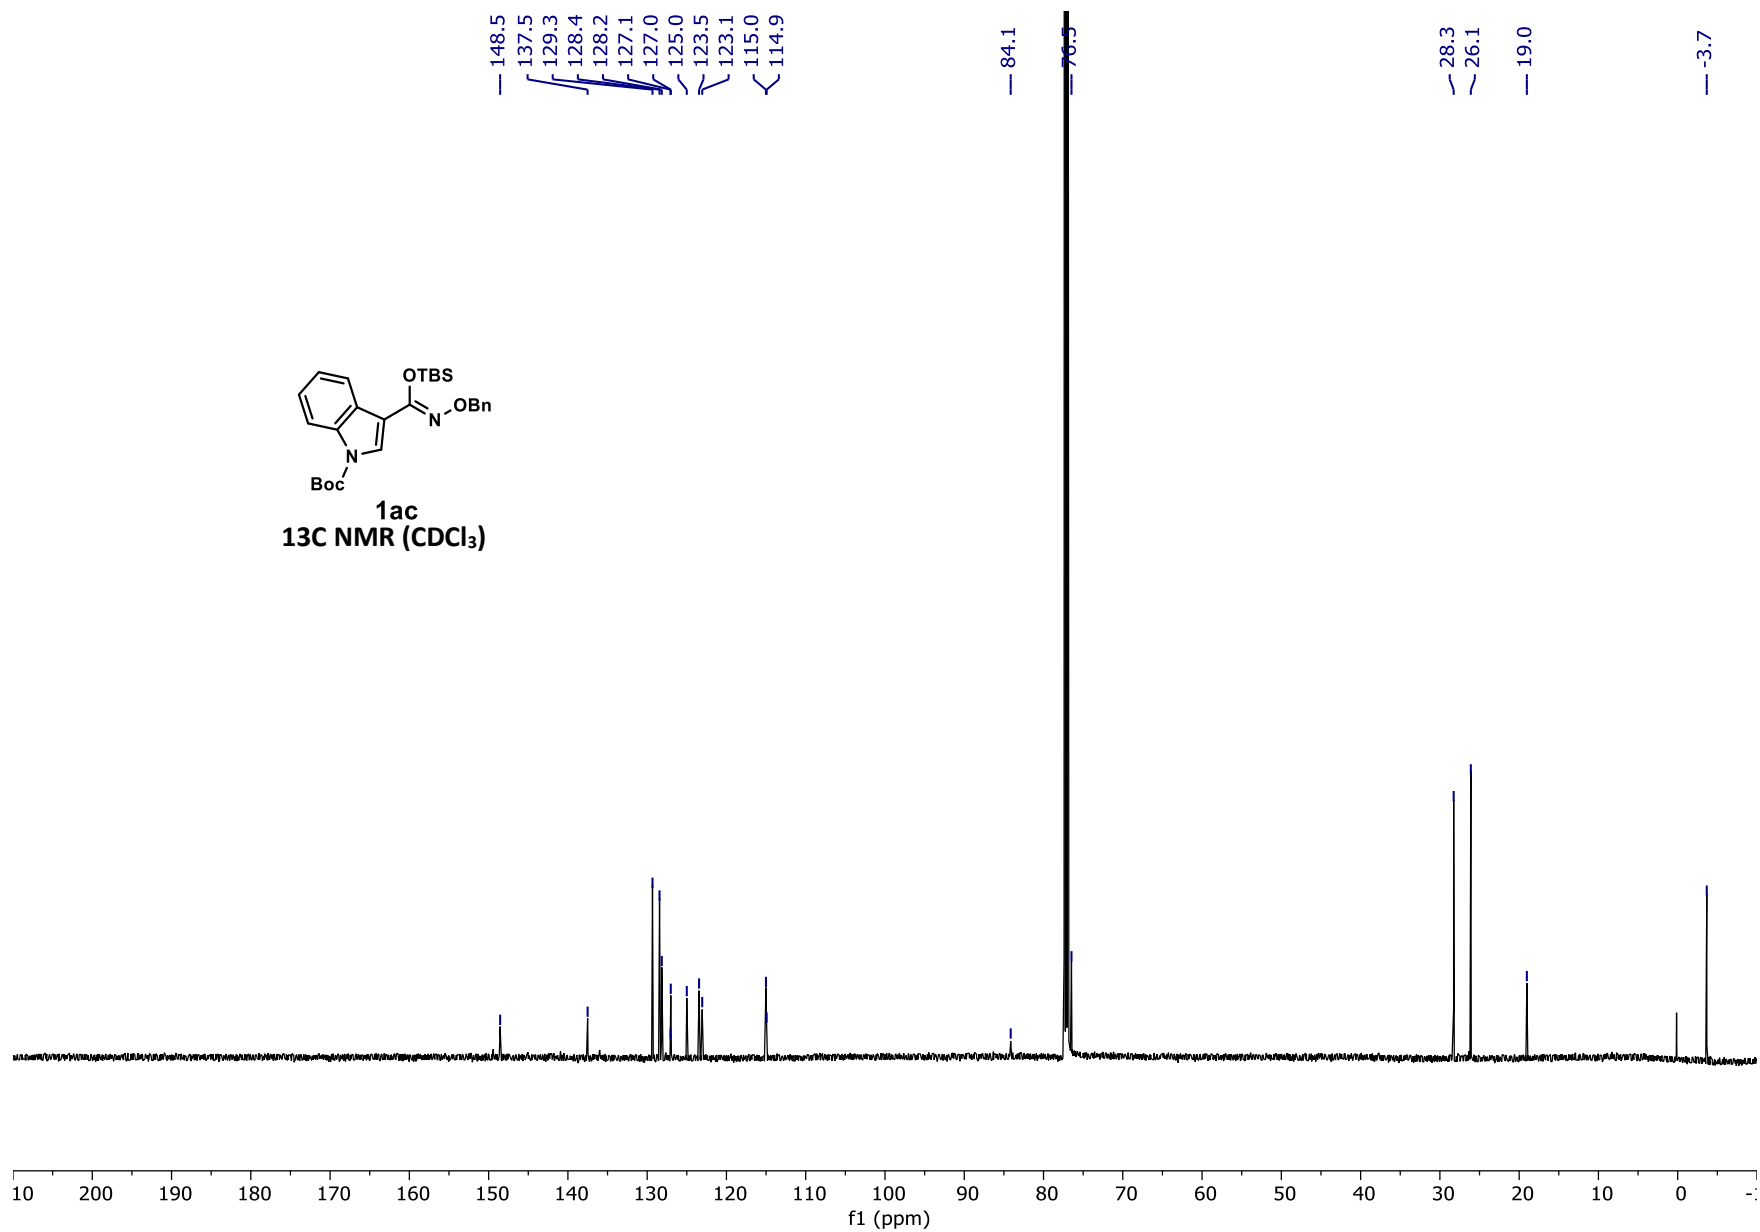

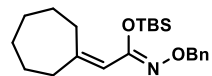

1ad

<sup>1</sup>H NMR (CDCl<sub>3</sub>)

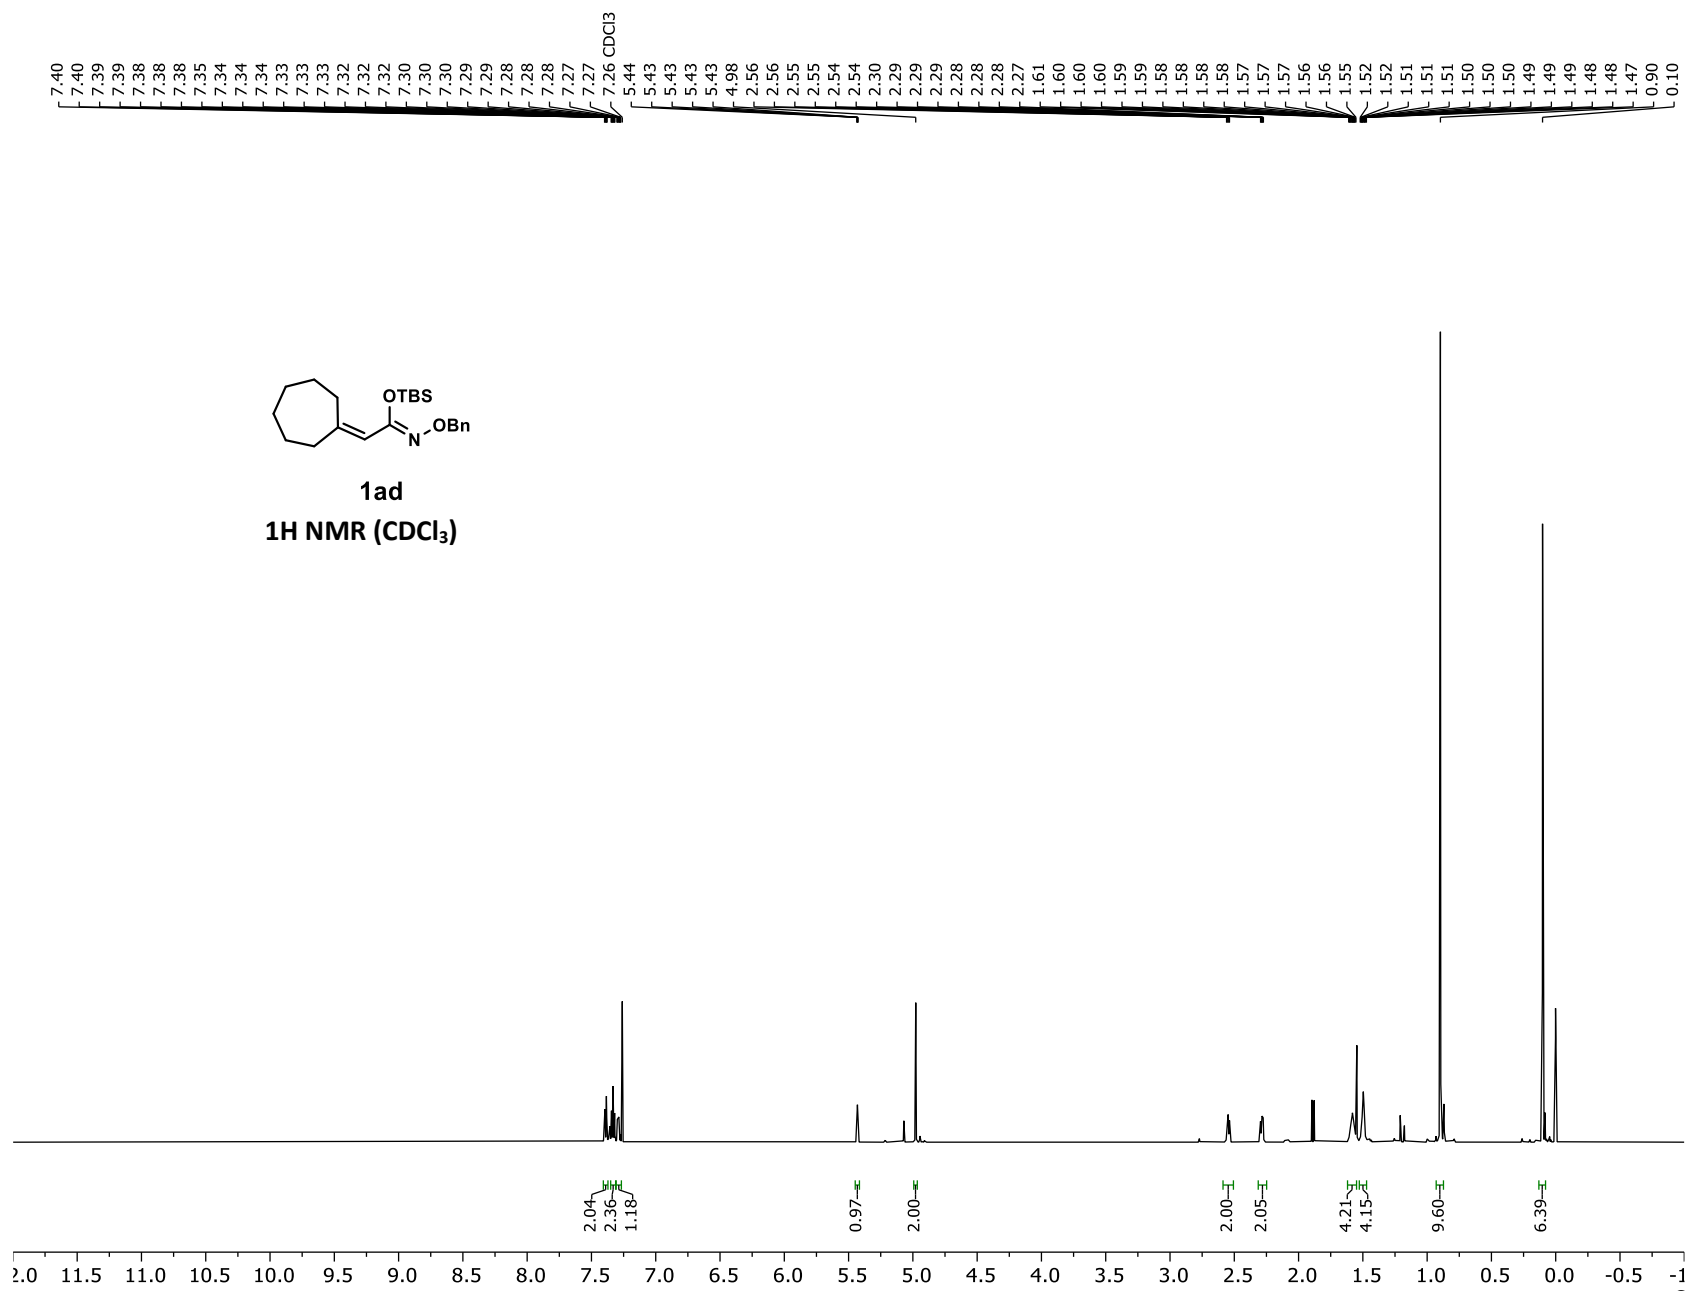

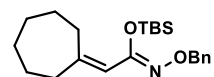

1ad

$^{13}\text{C}$  NMR ( $\text{CDCl}_3$ )

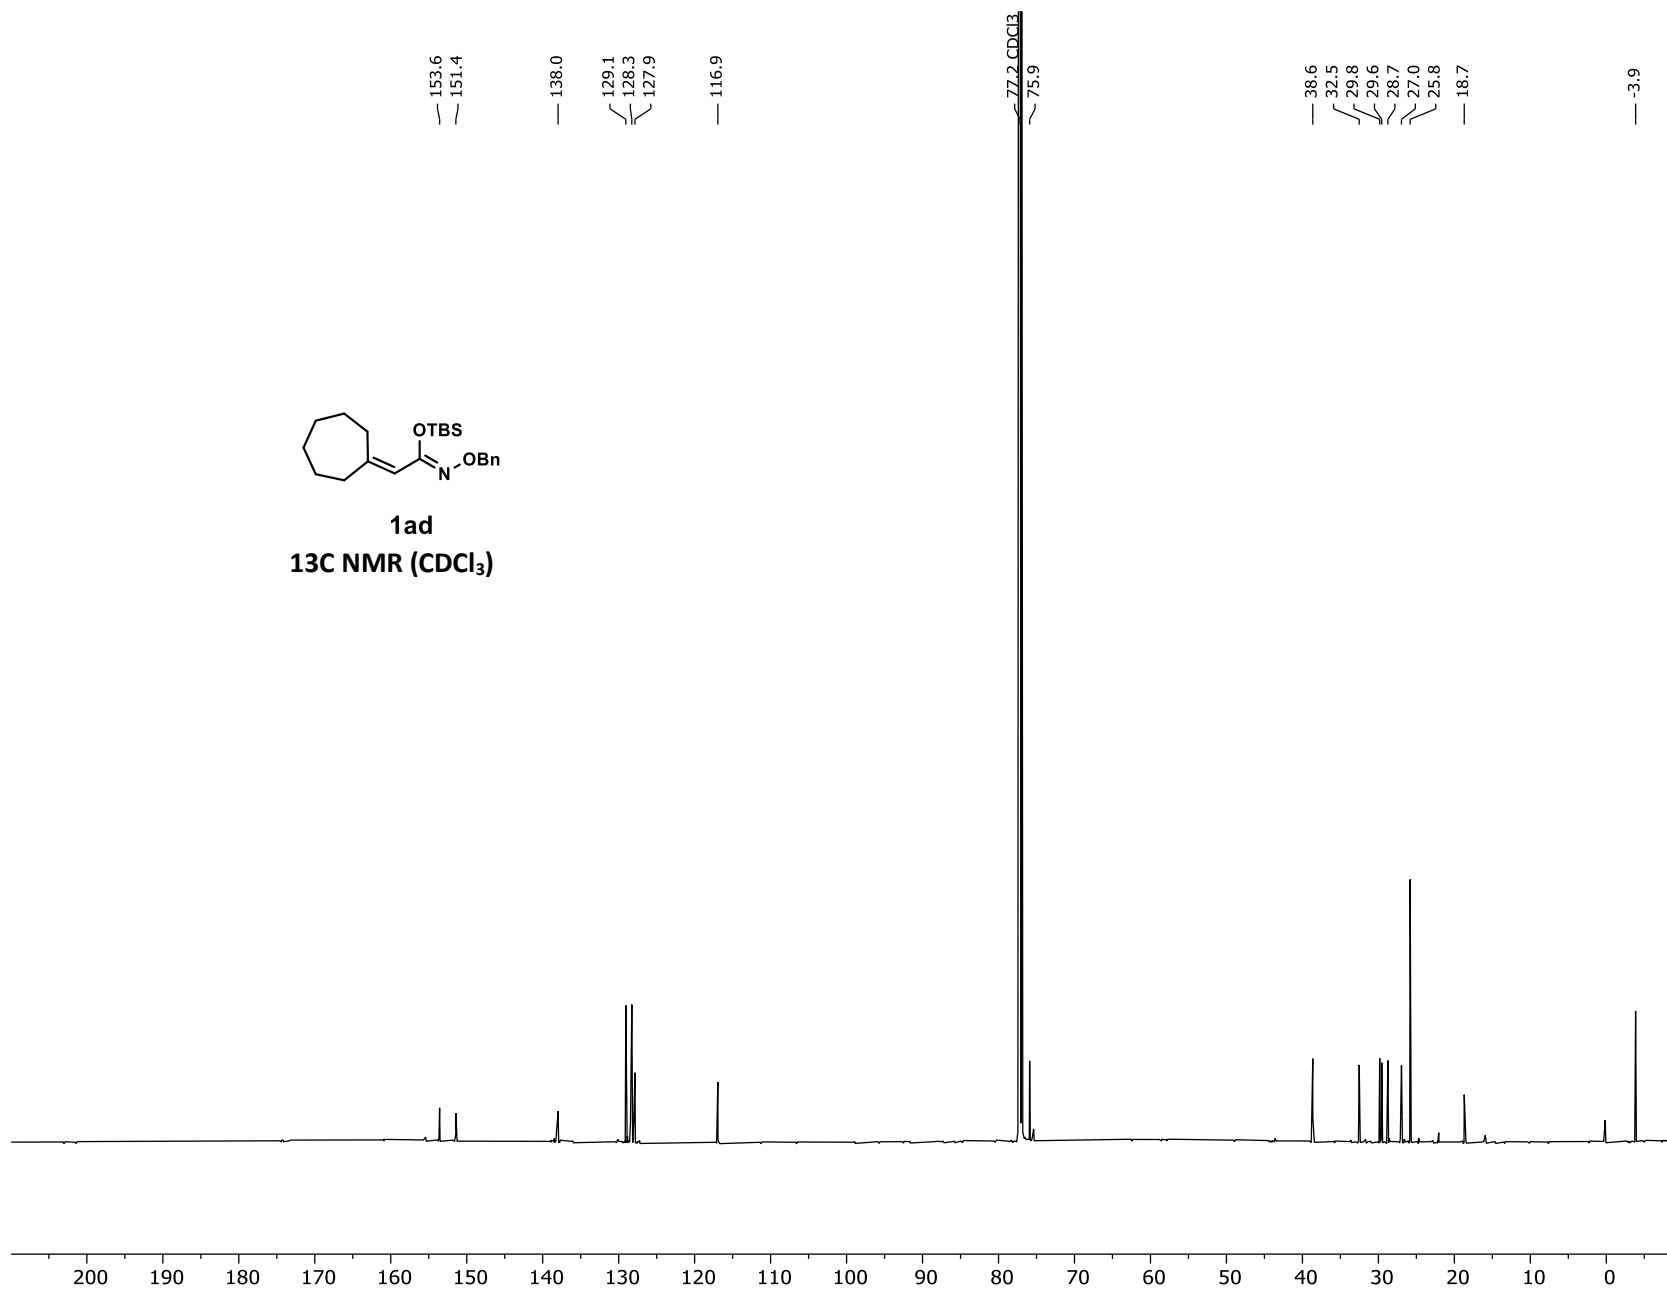

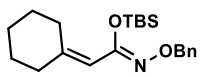

**1ae**  
**<sup>1</sup>H NMR (CDCl<sub>3</sub>)**

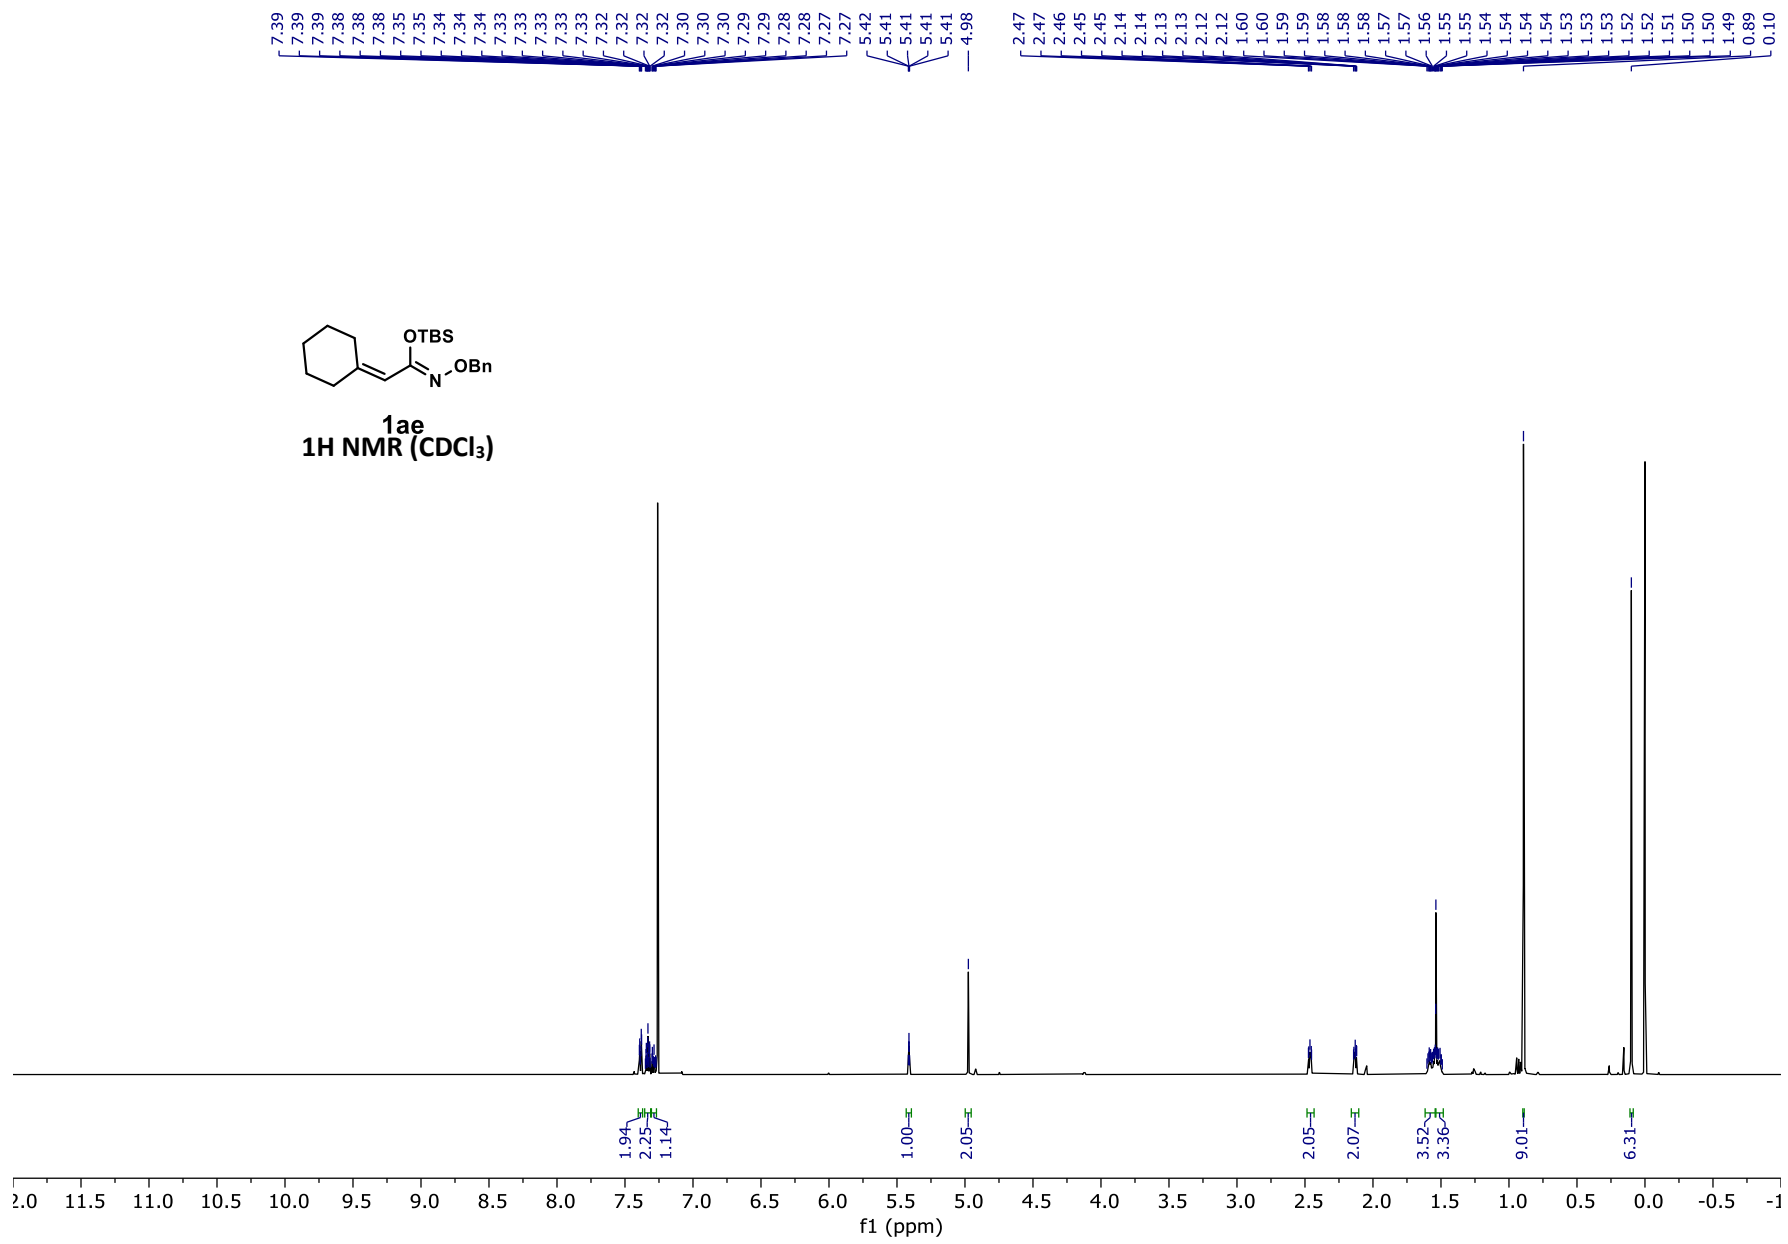

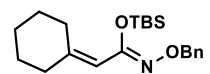

**1ae**  
**<sup>13</sup>C NMR (CDCl<sub>3</sub>)**

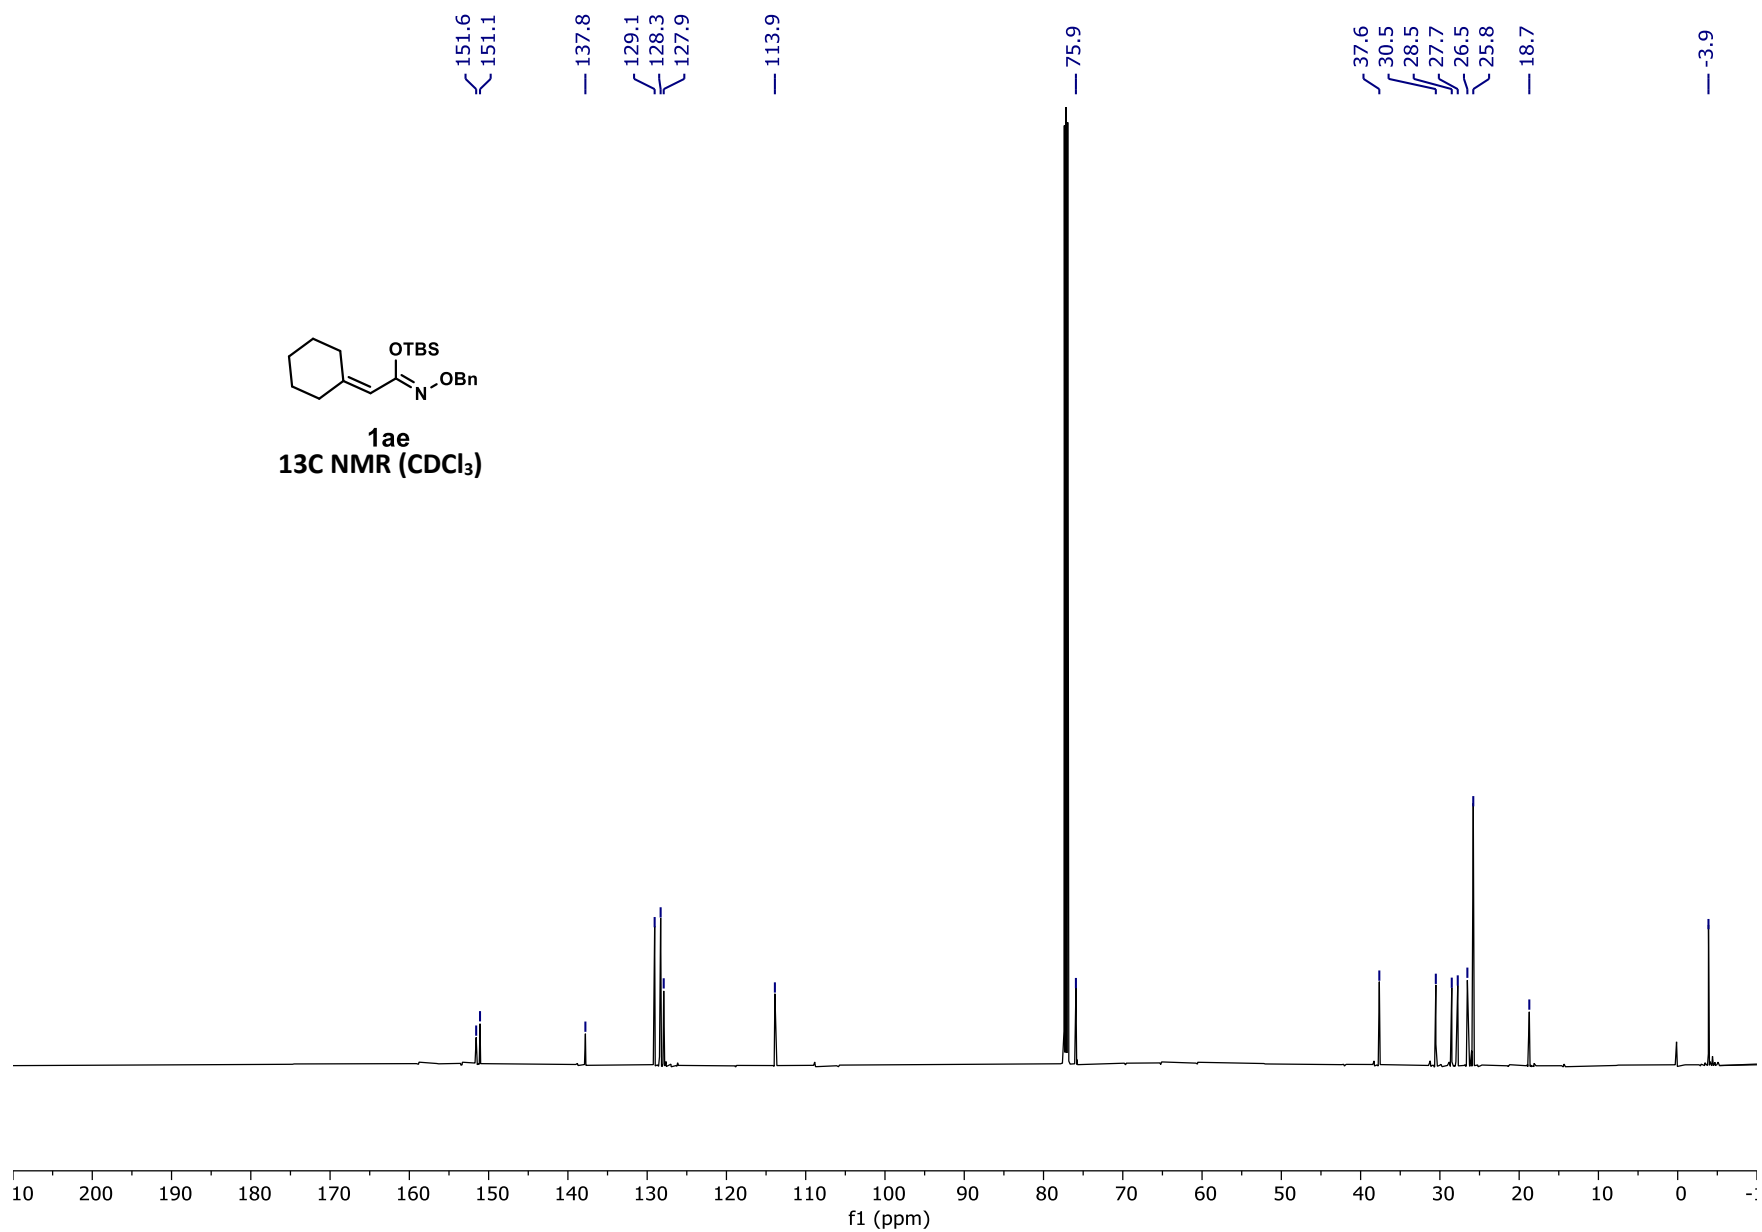



7.40  
7.40  
7.39  
7.39  
7.38  
7.38  
7.35  
7.35  
7.34  
7.34  
7.34  
7.34  
7.33  
7.33  
7.33  
7.32  
7.32  
7.30  
7.30  
7.30  
7.29  
7.29  
7.29  
7.28  
7.28  
5.59  
5.59  
5.58  
5.58  
5.58  
4.97  
4.97  
2.51  
2.51  
2.51  
2.50  
2.50  
2.50  
2.50  
2.49  
2.49  
2.49  
2.49  
2.48  
2.48  
2.48  
2.48  
2.37  
2.37  
2.36  
2.36  
2.36  
2.36  
2.35  
2.35  
2.35  
2.35  
2.34  
2.34  
2.34  
2.34  
2.33  
2.33  
1.69  
1.68  
1.68  
1.67  
1.67  
1.66  
1.66  
1.66  
1.66  
1.65  
1.65  
1.63  
1.63  
1.62  
1.62  
1.62  
1.62  
1.61  
1.61  
1.61  
1.61  
1.60  
1.60  
1.59  
1.59  
0.90  
0.11

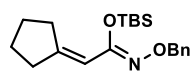

1af

<sup>1</sup>H NMR (CDCl<sub>3</sub>)

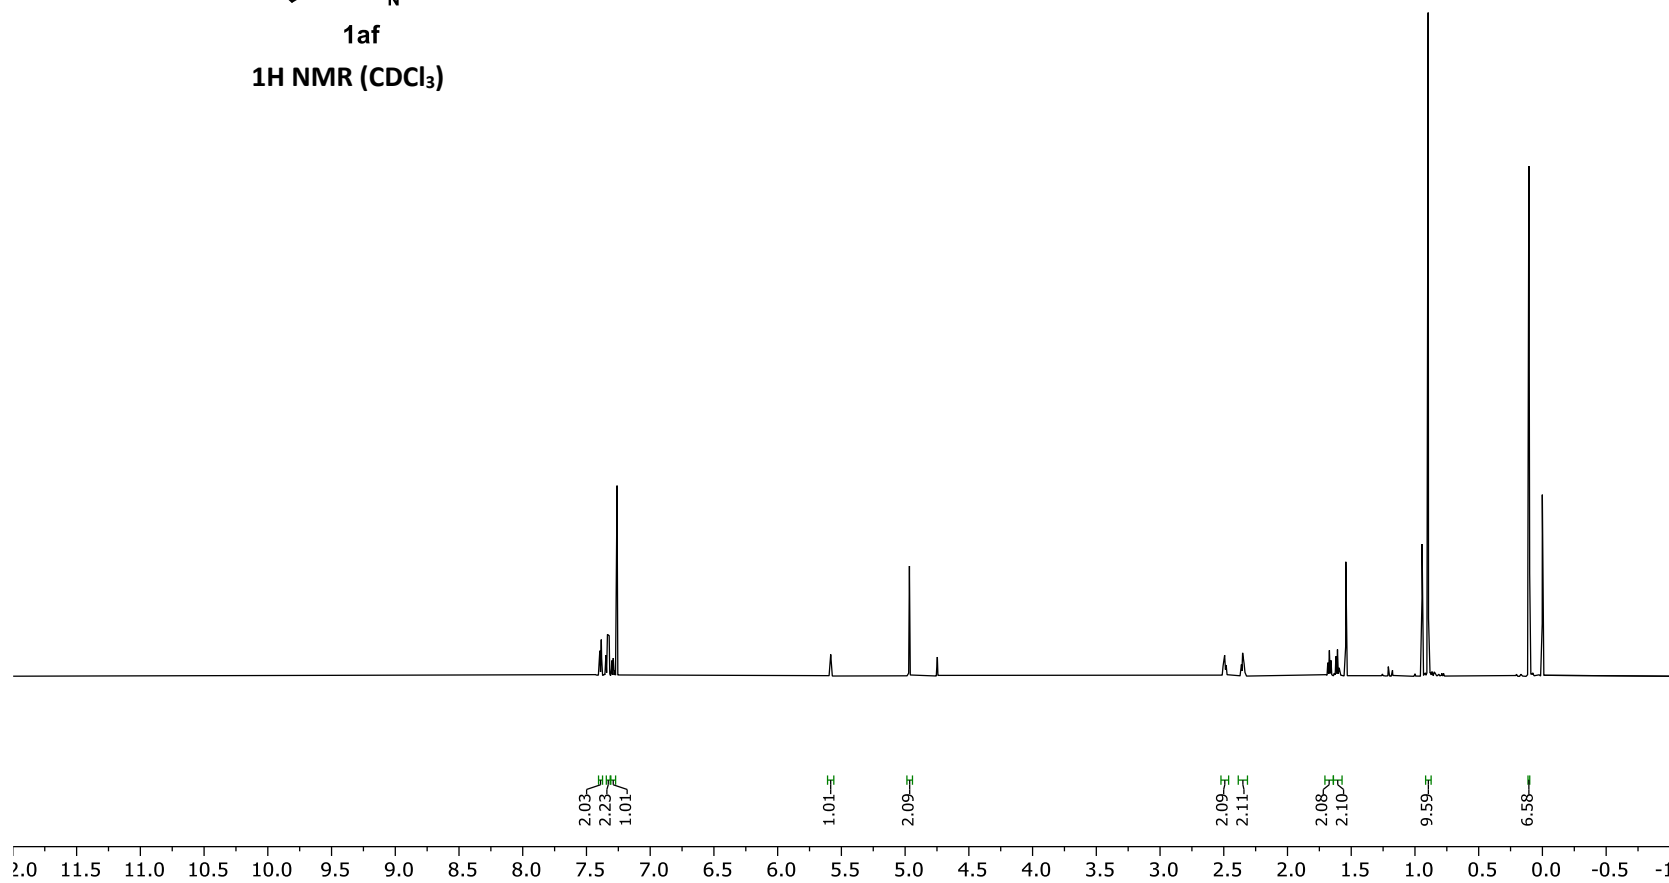

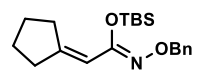

1af

<sup>13</sup>C NMR (CDCl<sub>3</sub>)

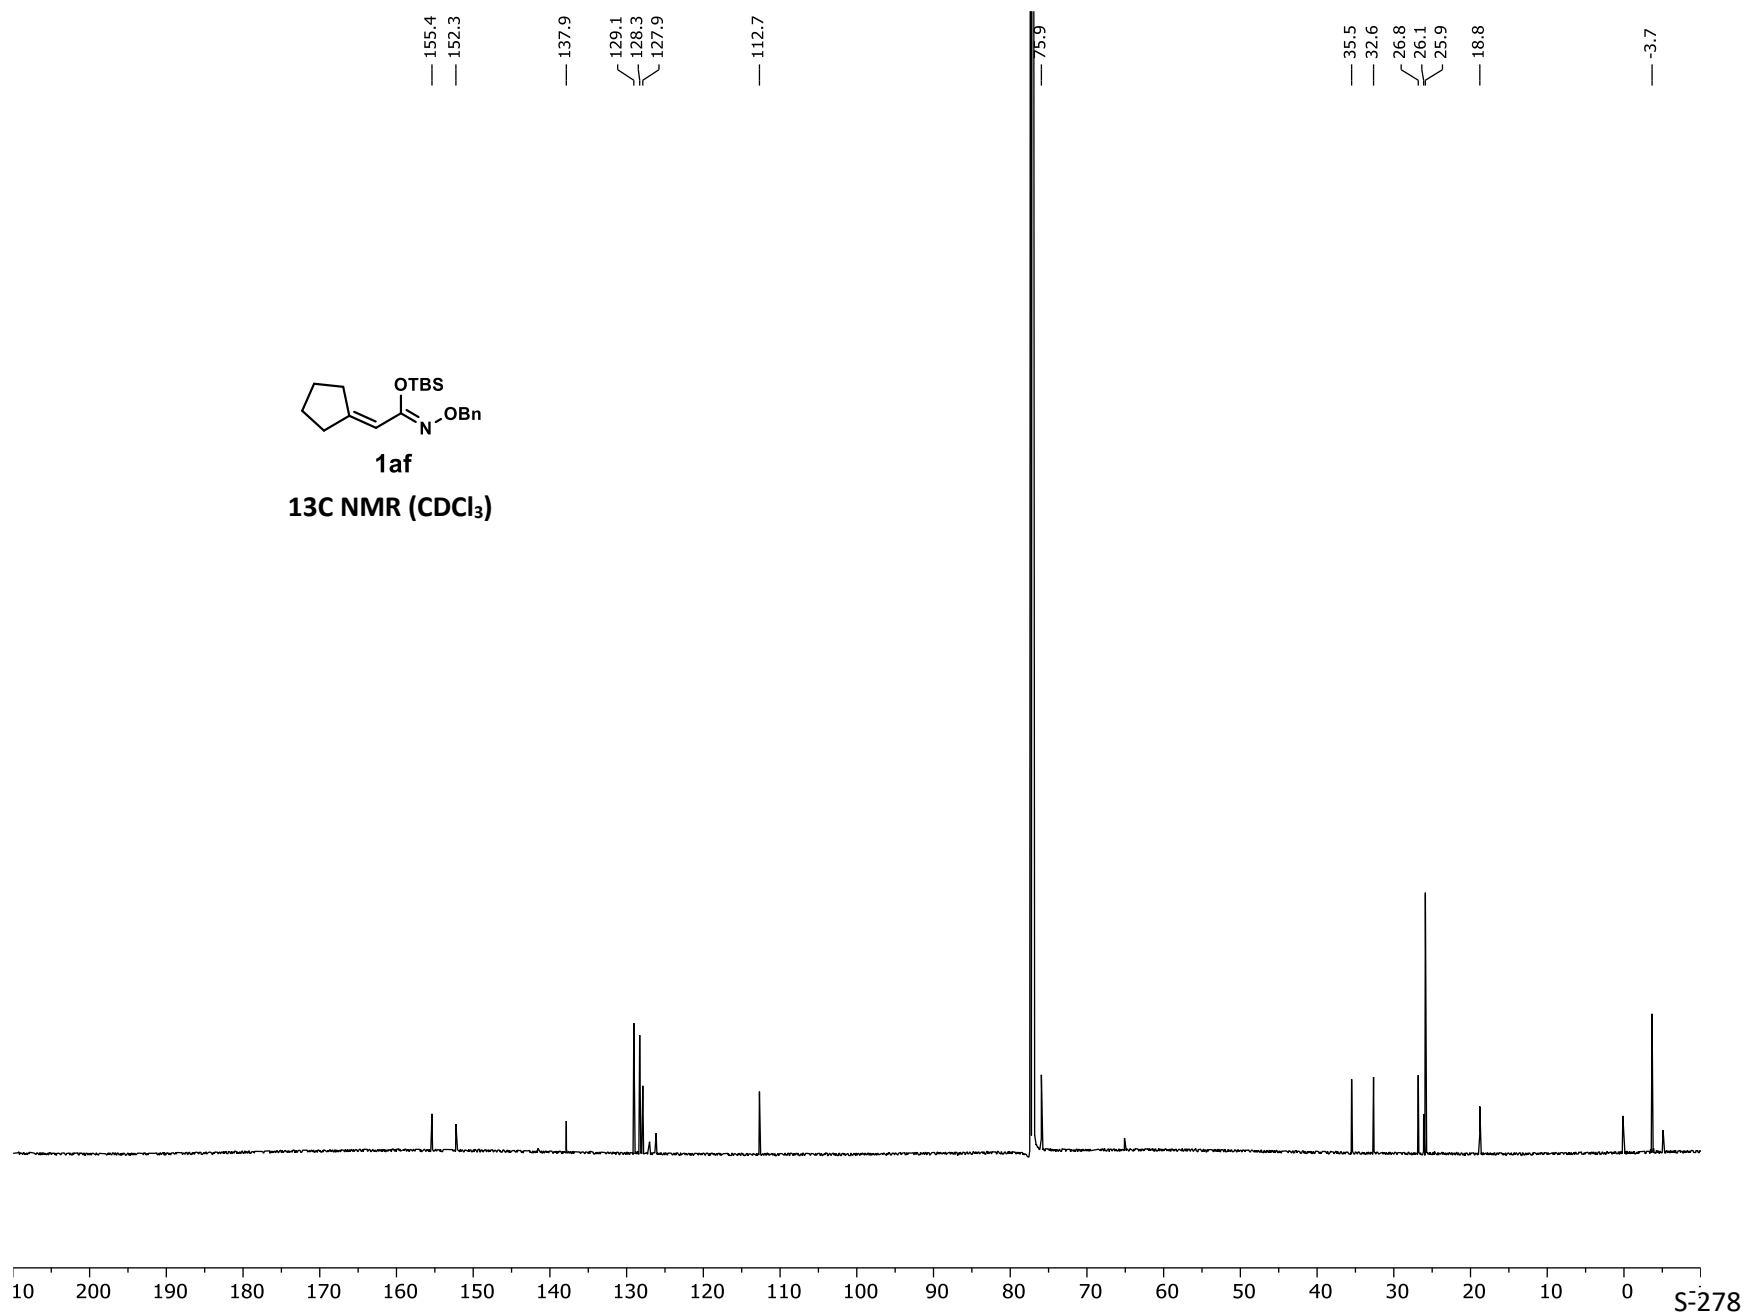

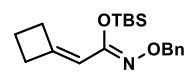

1ag

<sup>1</sup>H NMR (CDCl<sub>3</sub>)

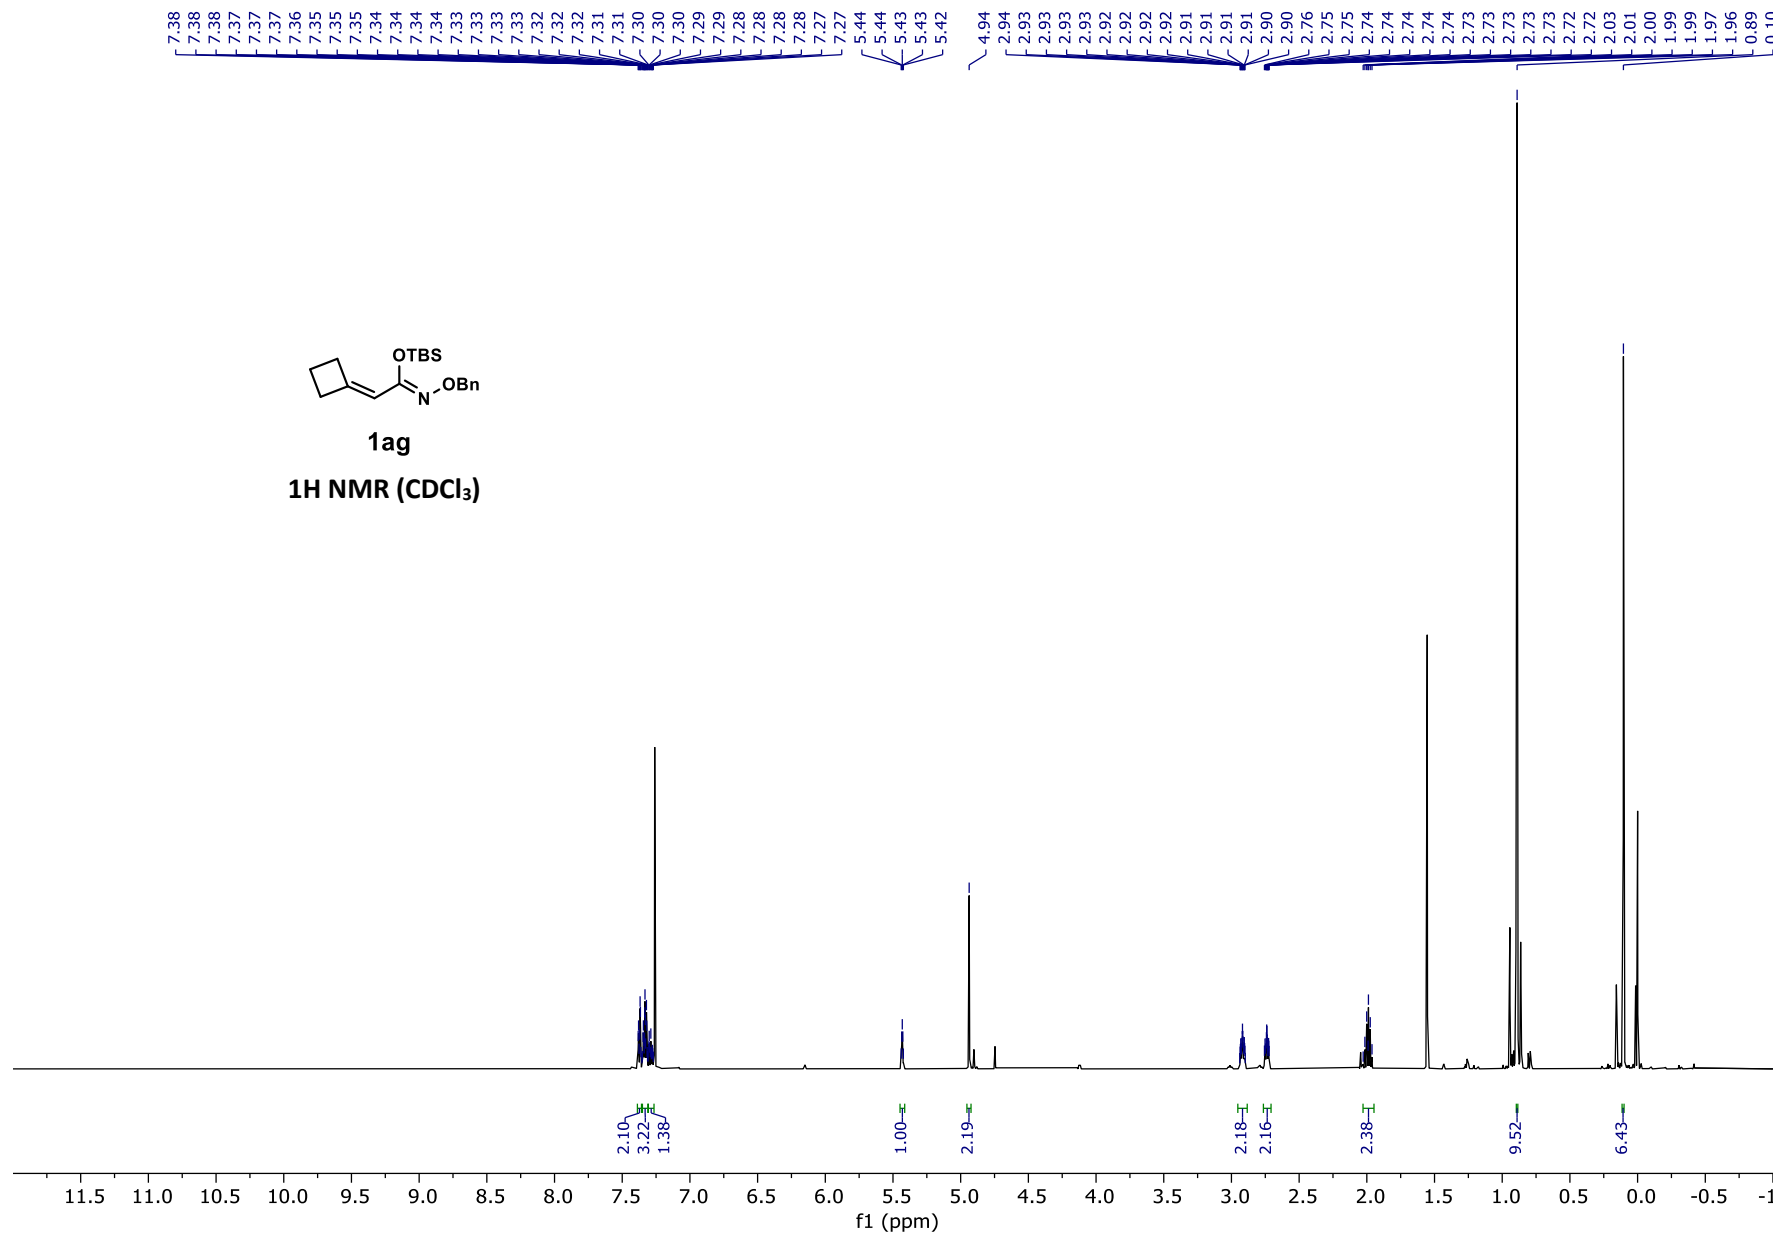

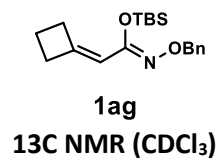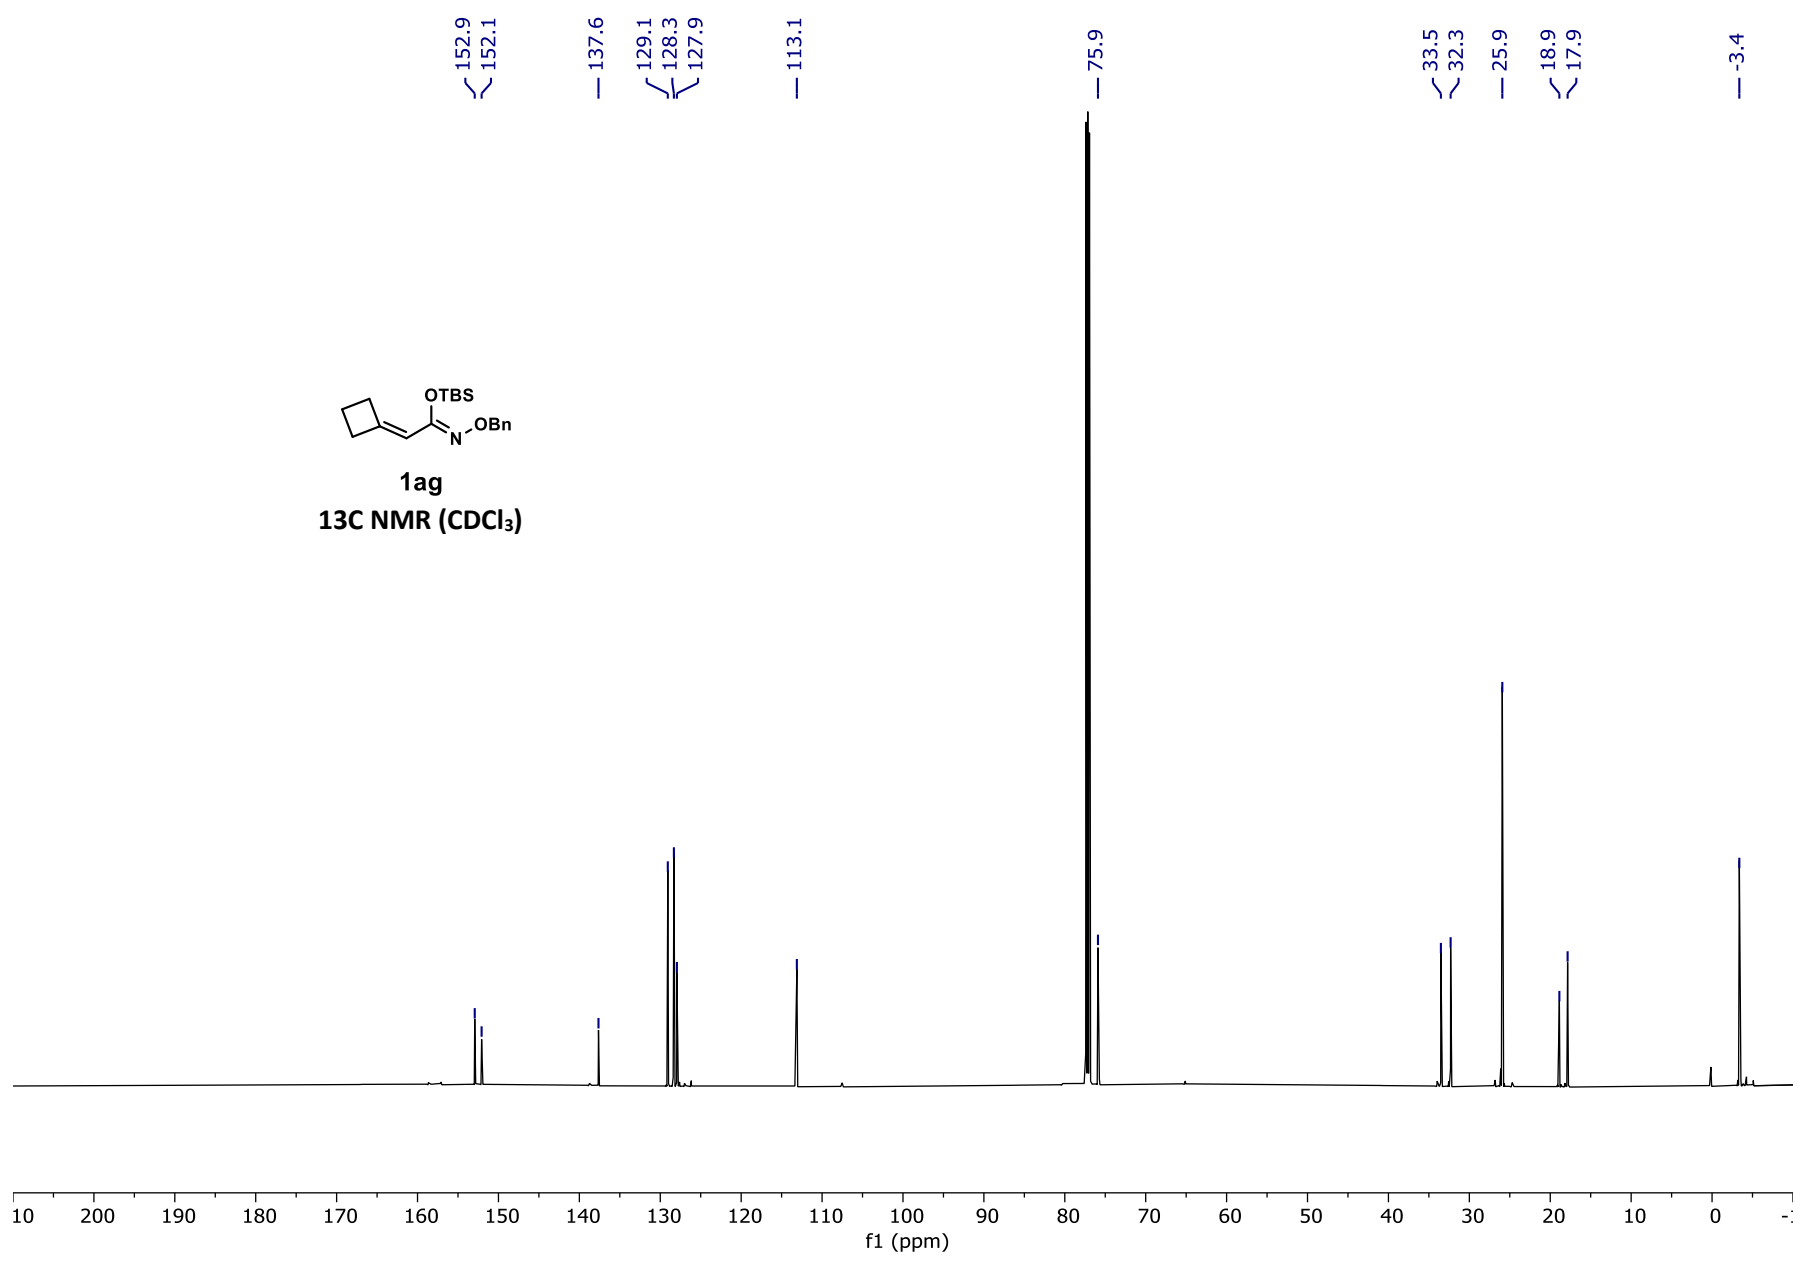

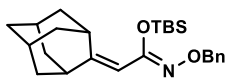

1ah

<sup>1</sup>H NMR (CDCl<sub>3</sub>)

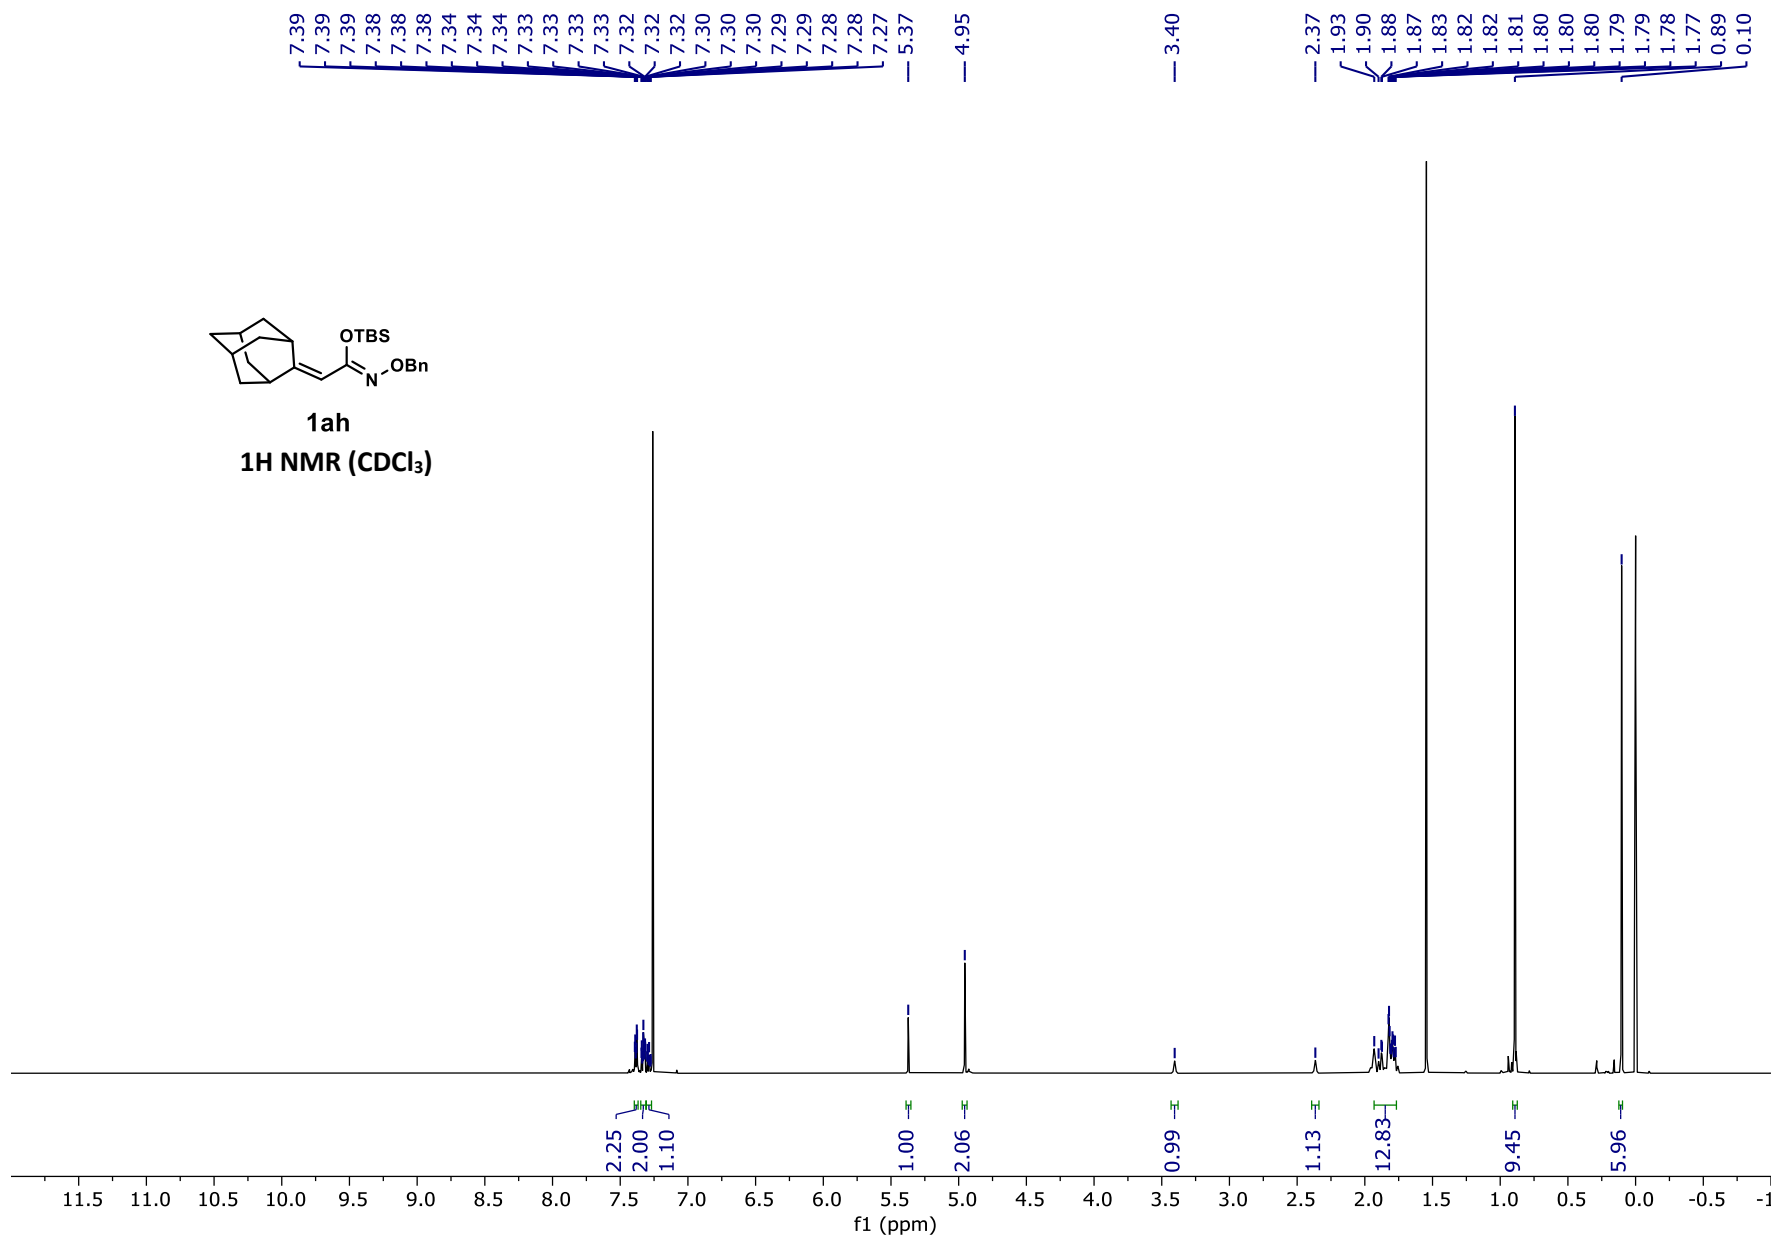

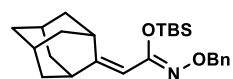

**1ah**  
**<sup>13</sup>C NMR (CDCl<sub>3</sub>)**

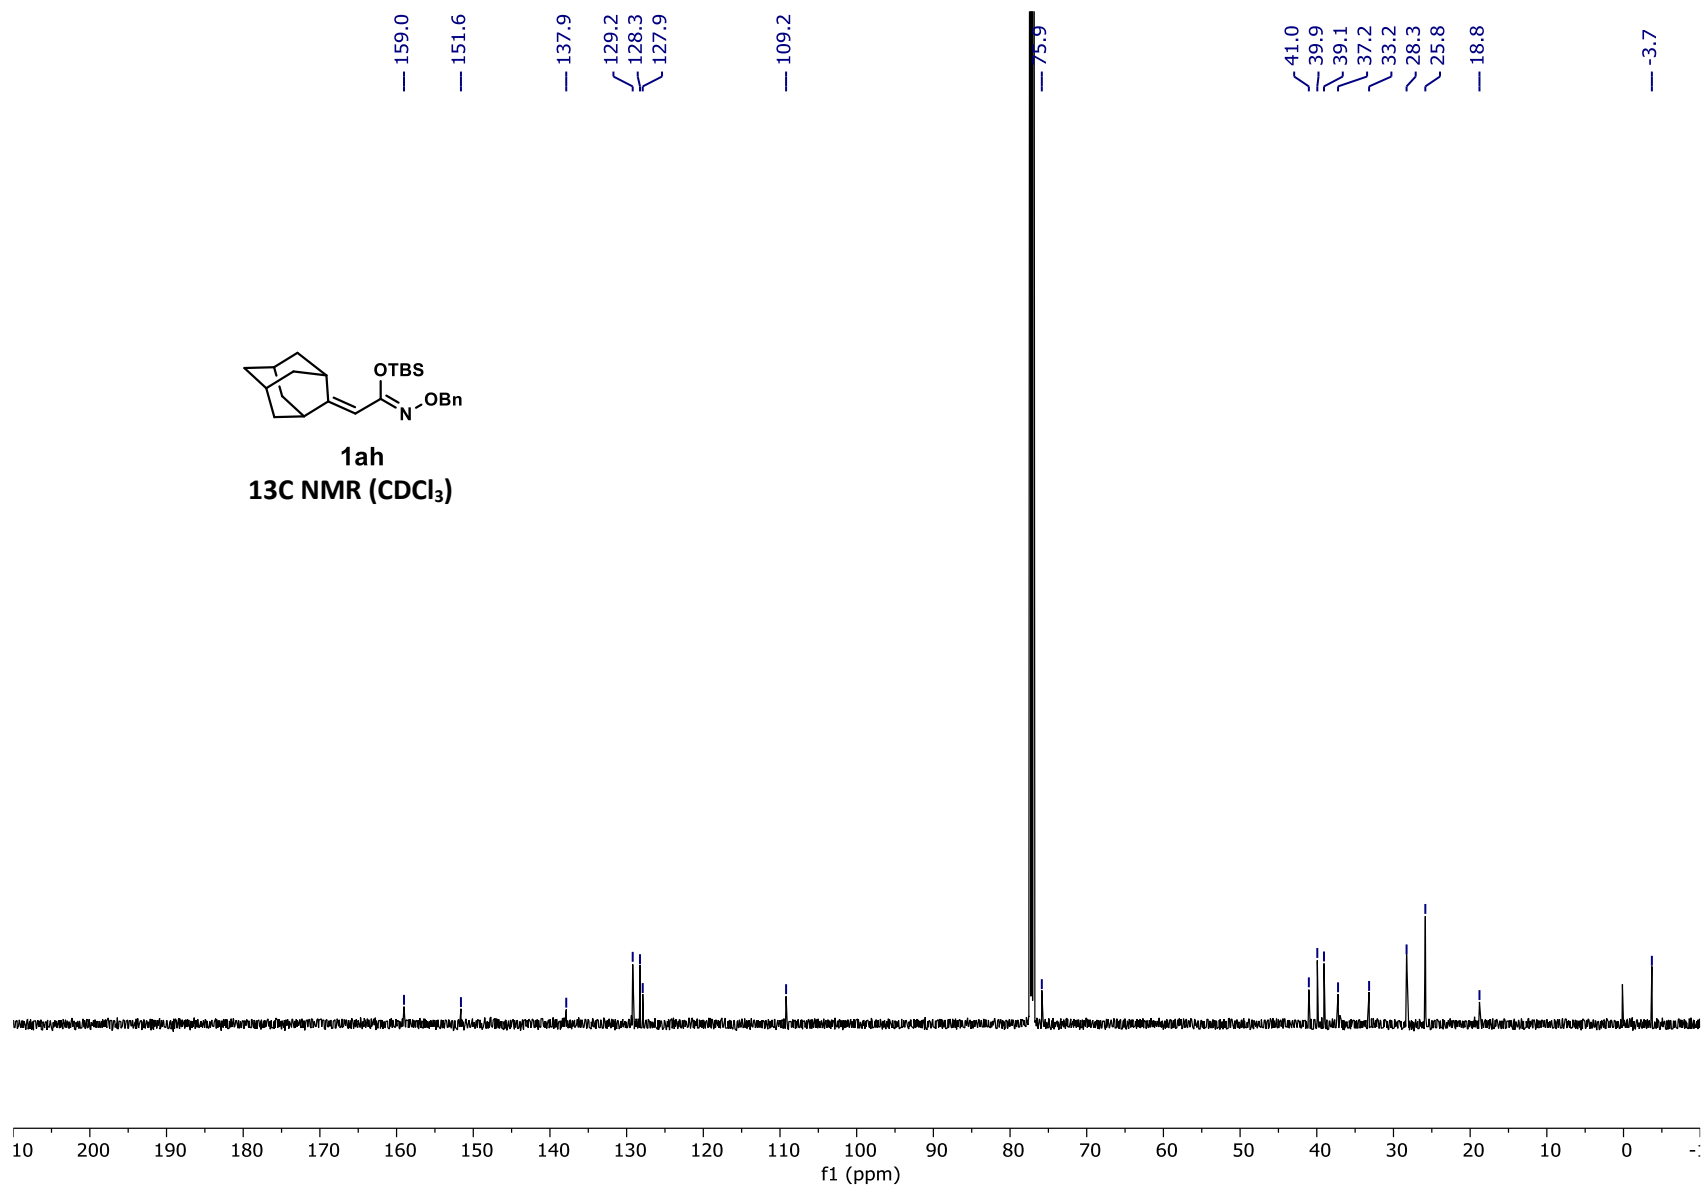

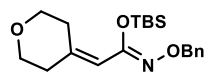

**1ai**

**<sup>1</sup>H NMR (CDCl<sub>3</sub>)**

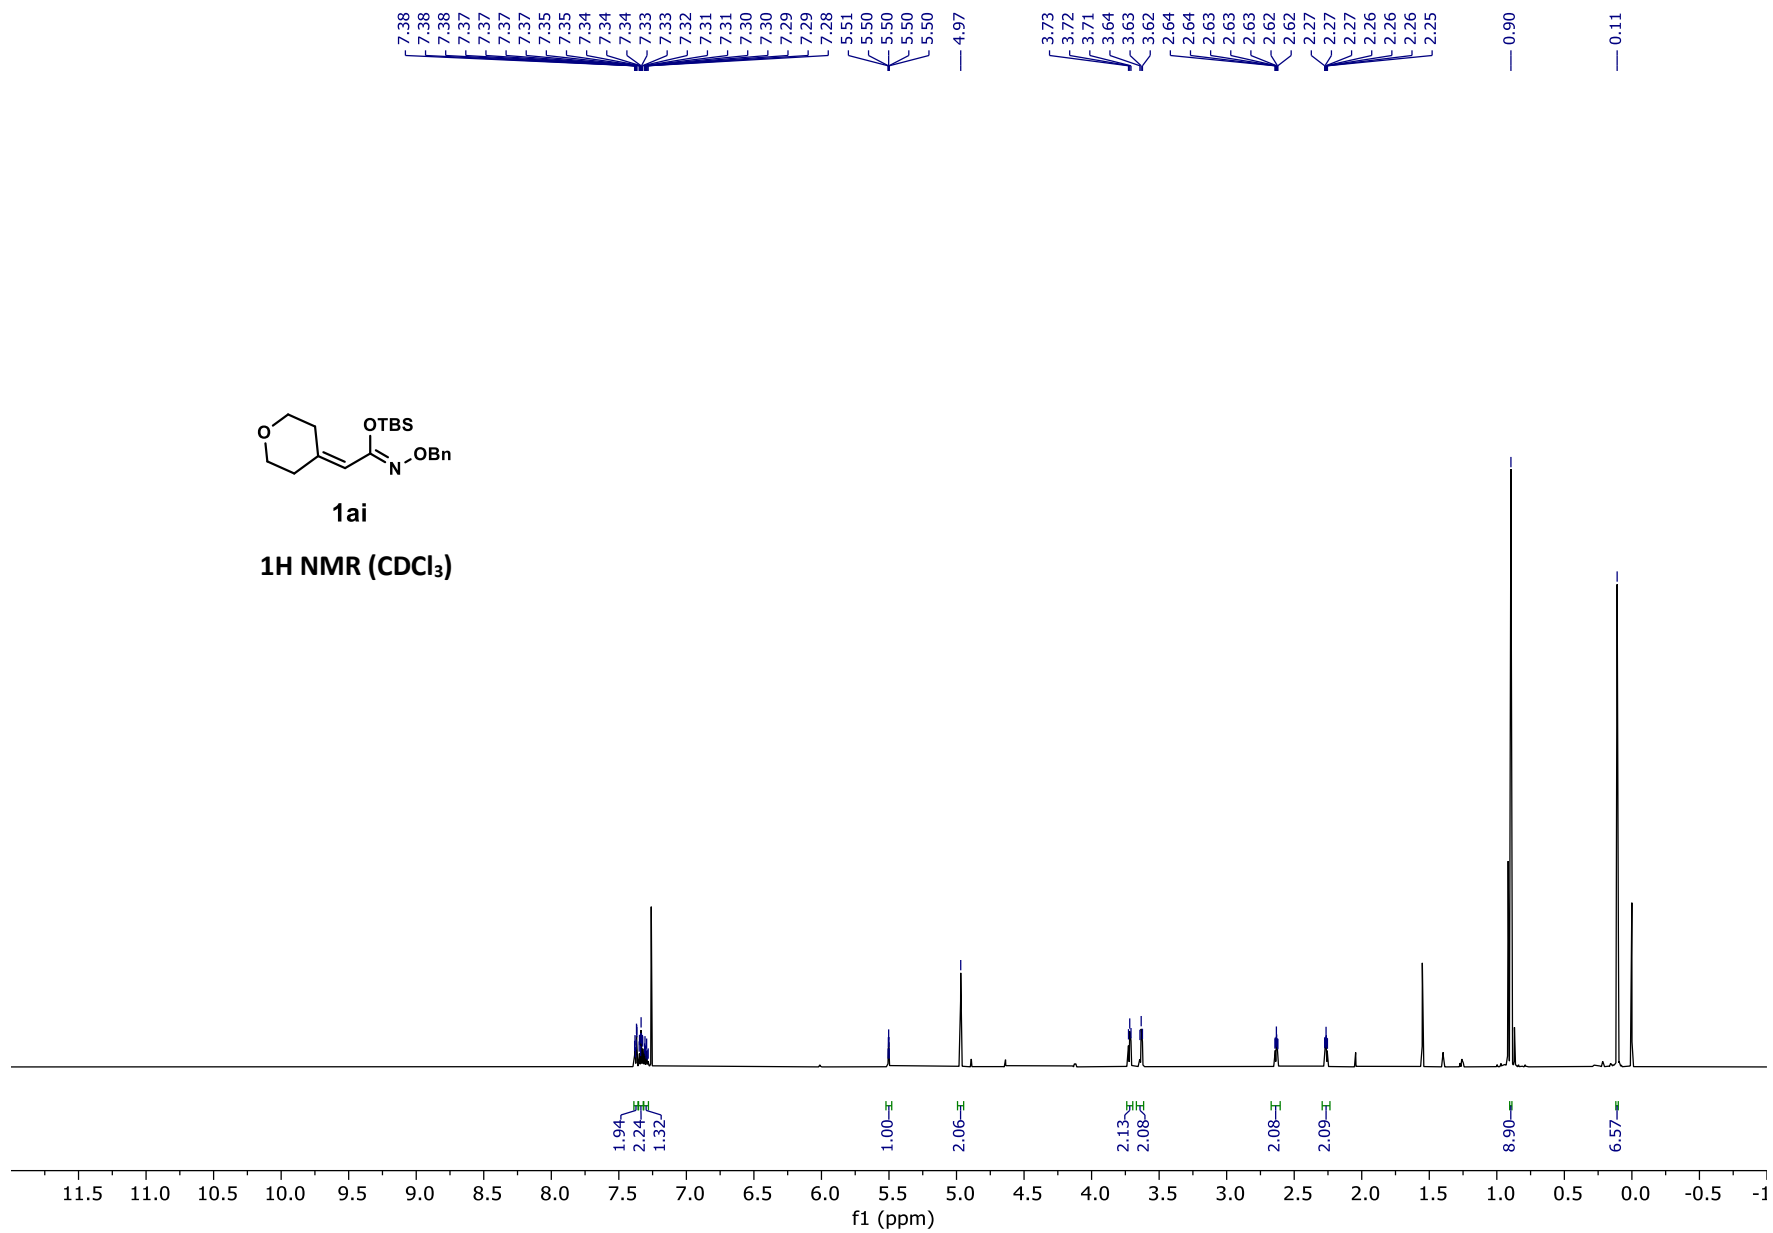

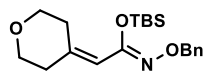

1ai

$^{13}\text{C}$  NMR ( $\text{CDCl}_3$ )

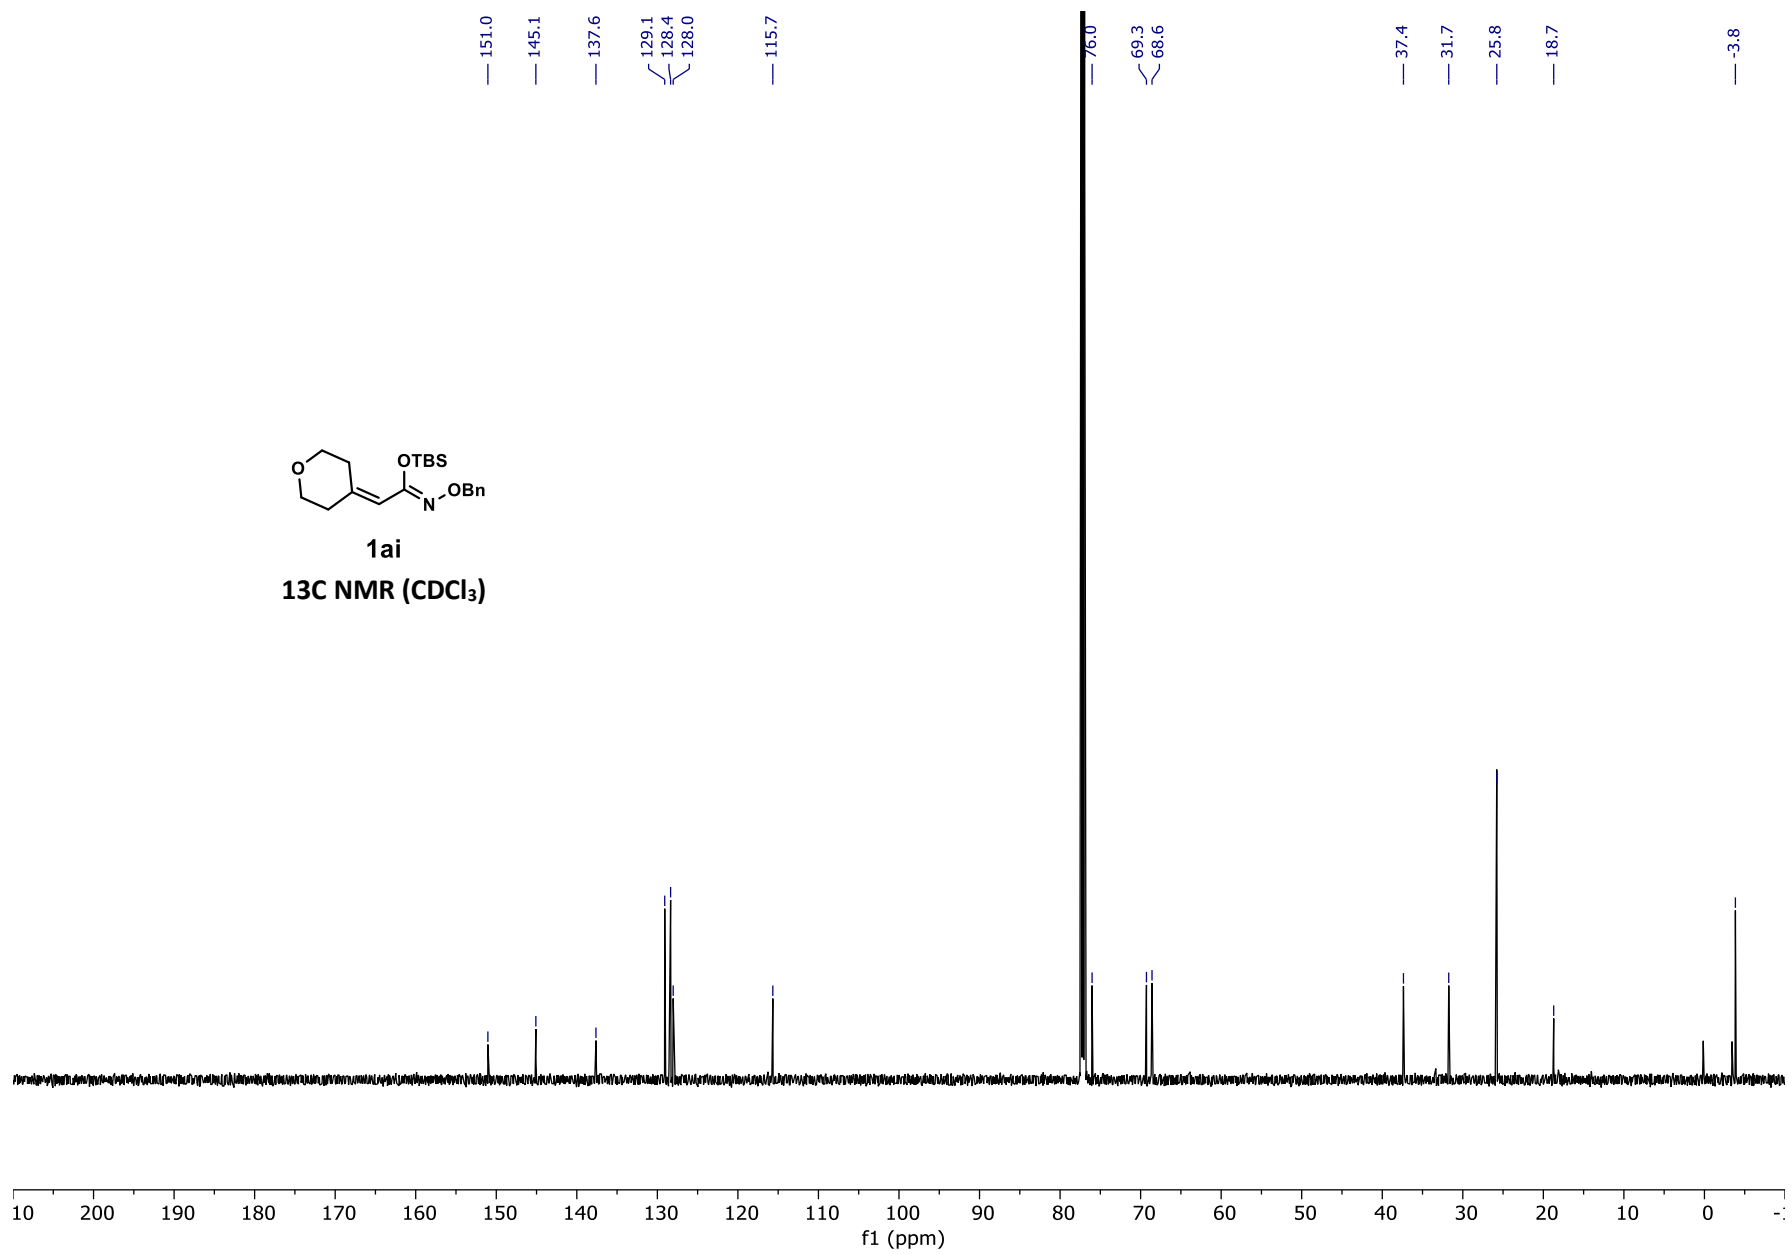



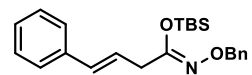

1aj

<sup>1</sup>H NMR (CDCl<sub>3</sub>)

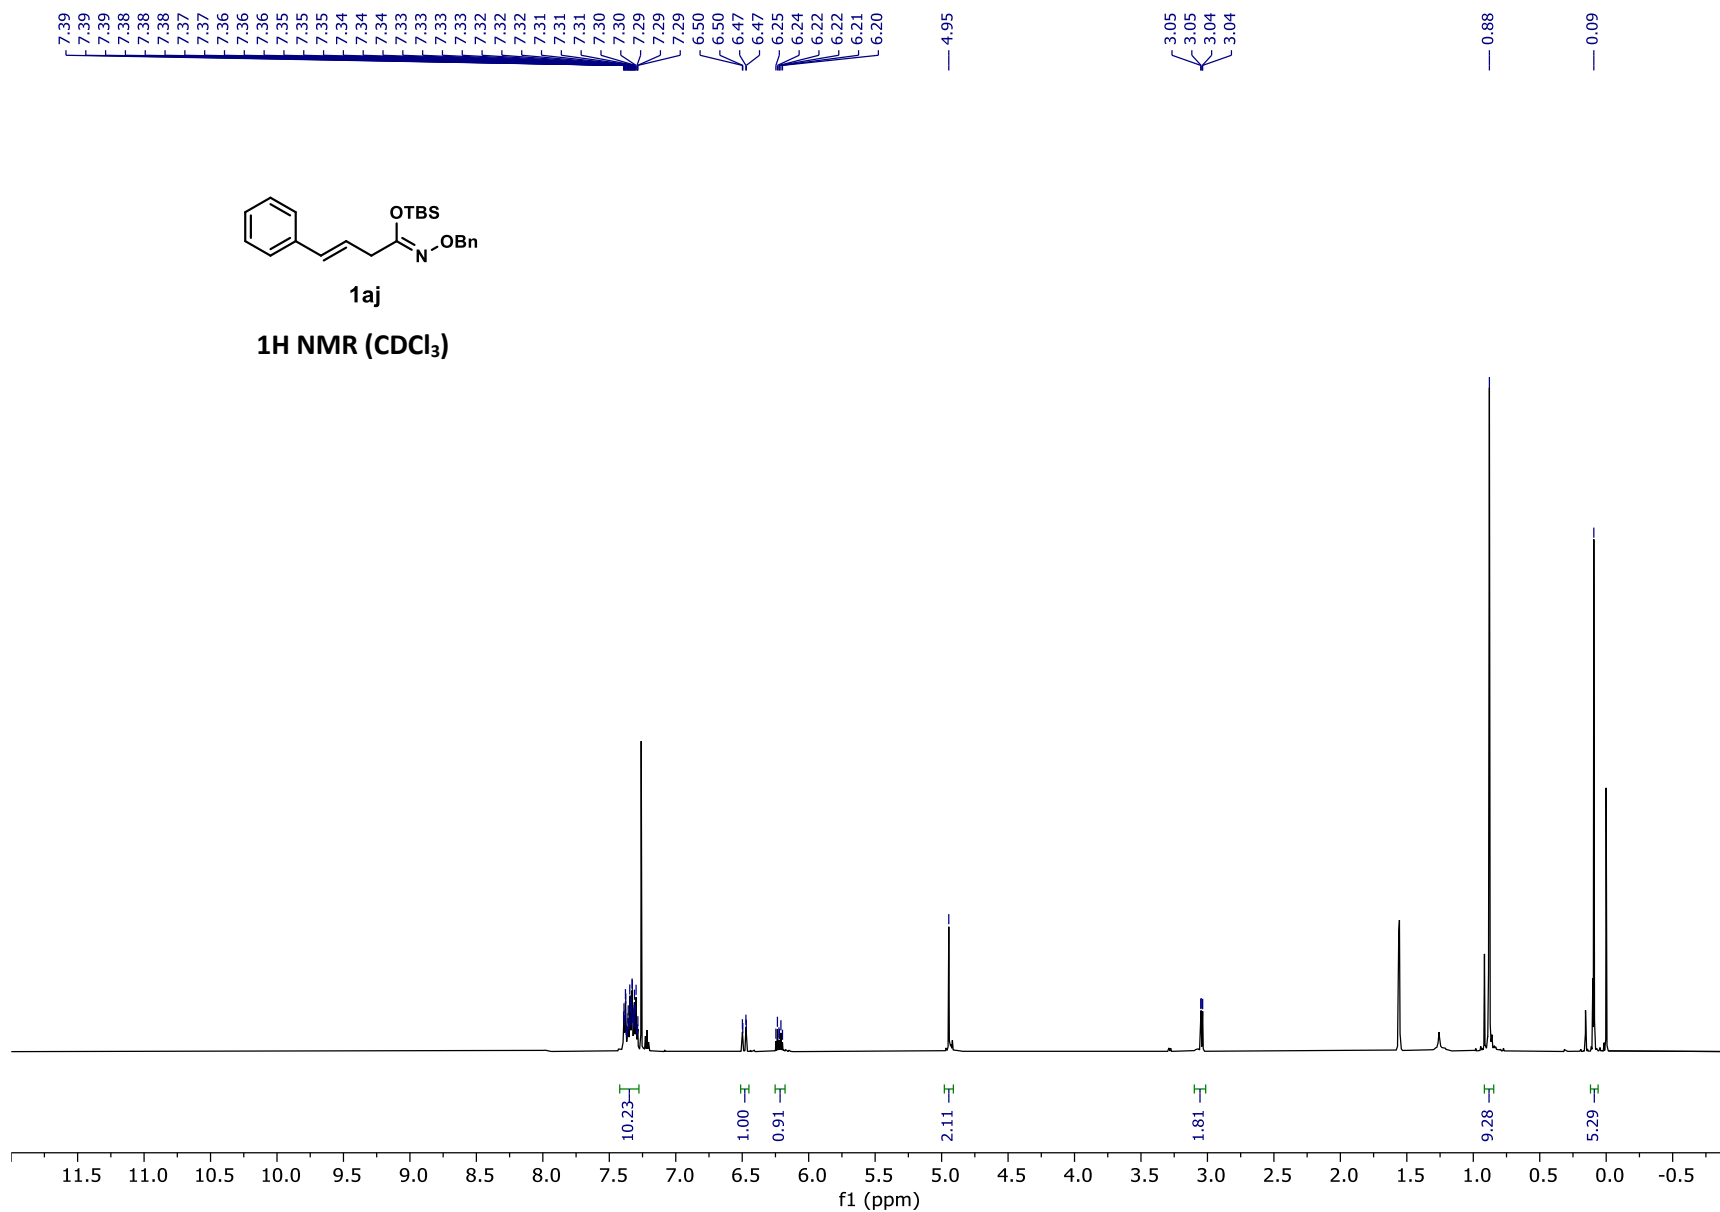

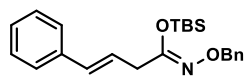

1aj  
13C NMR (CDCl<sub>3</sub>)

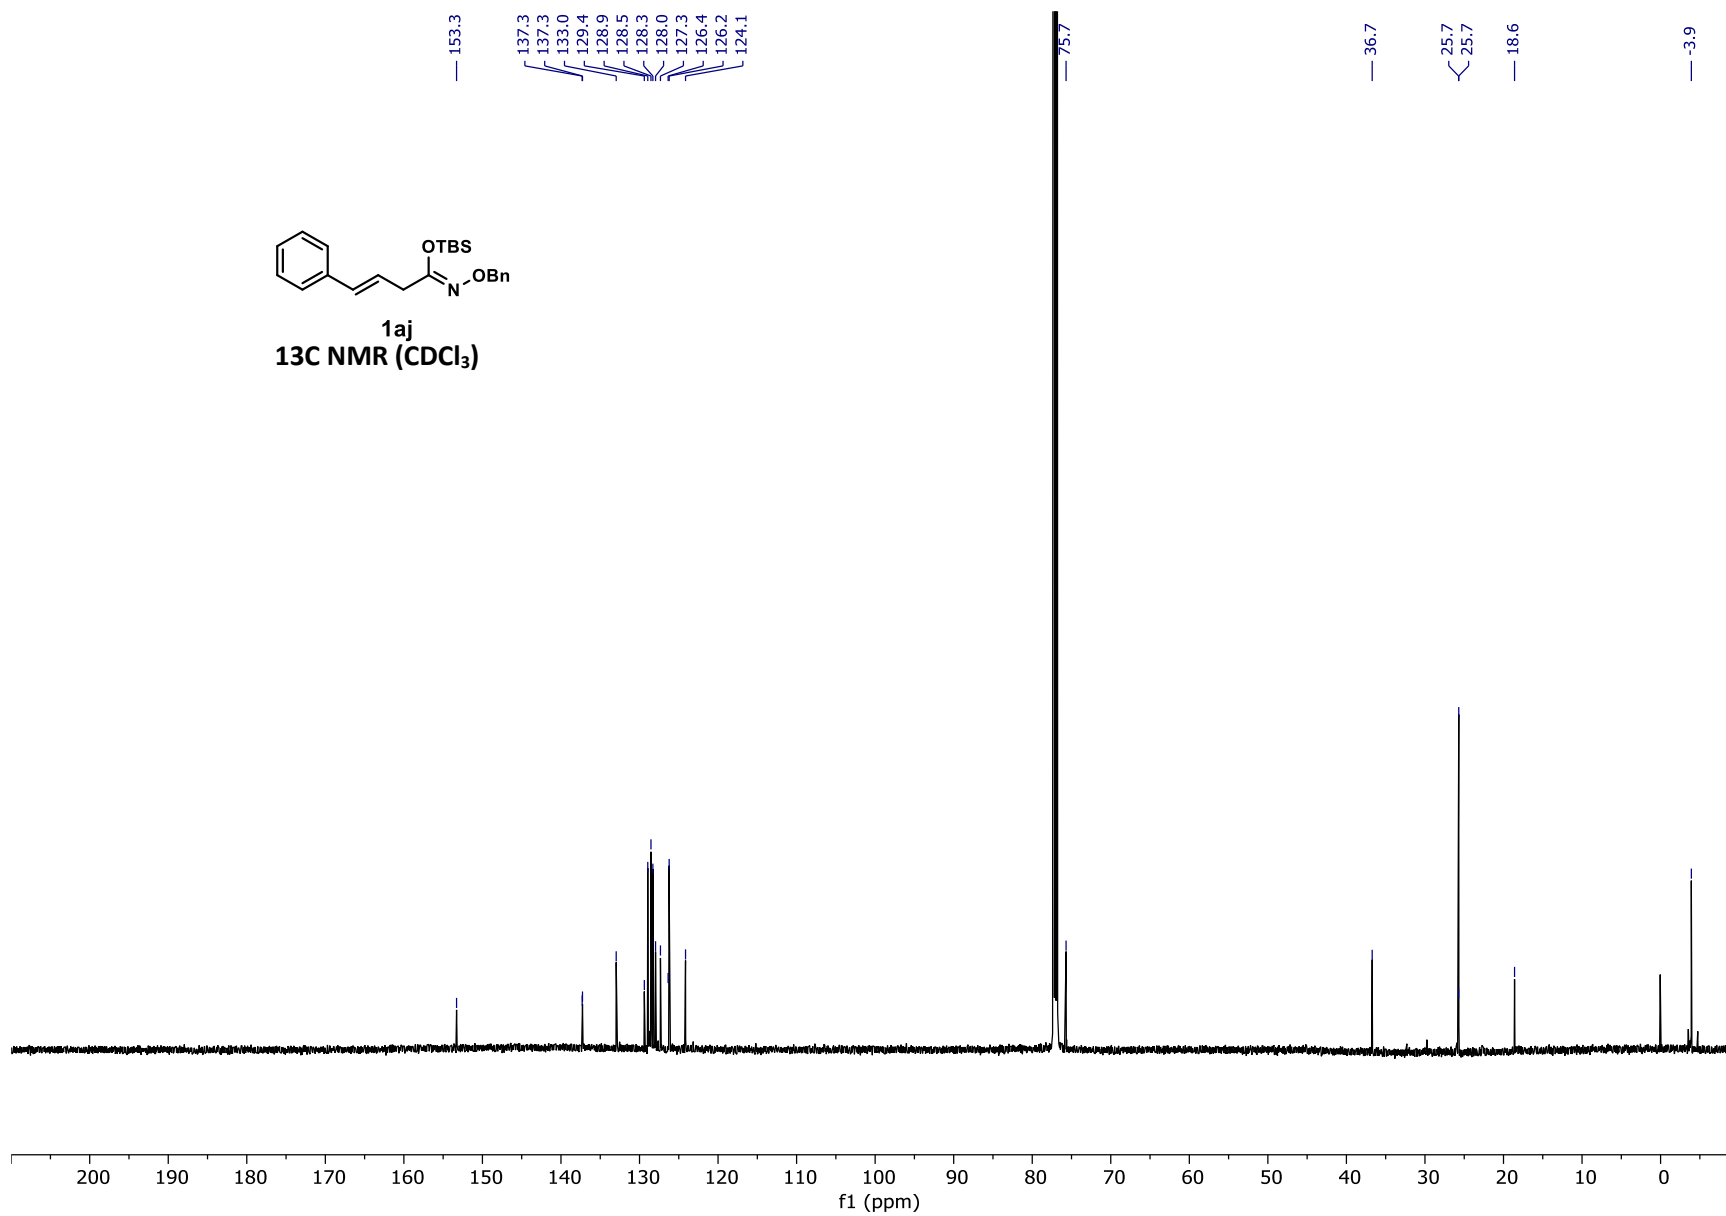

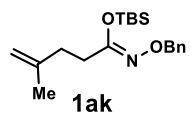

**<sup>1</sup>H NMR (CDCl<sub>3</sub>)**

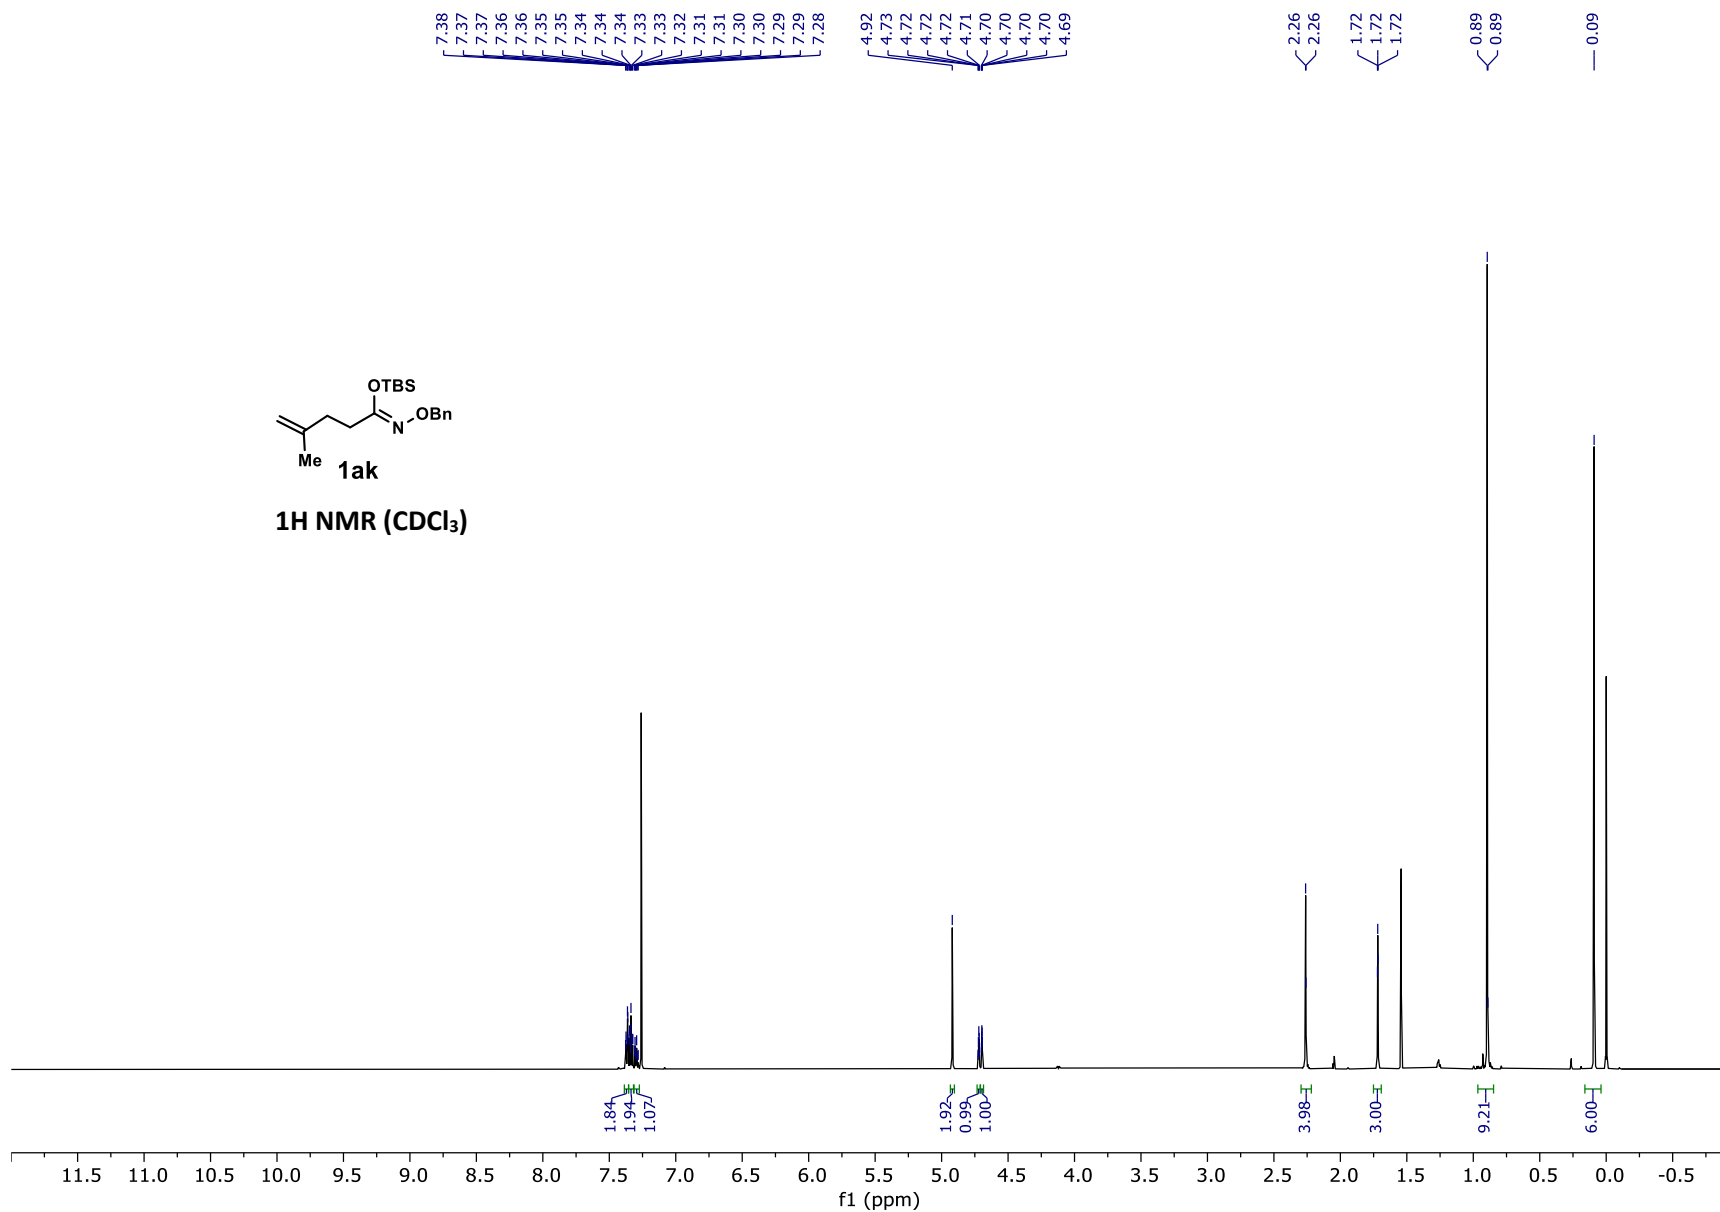

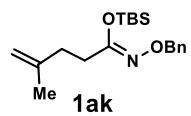

**<sup>13</sup>C NMR (CDCl<sub>3</sub>)**

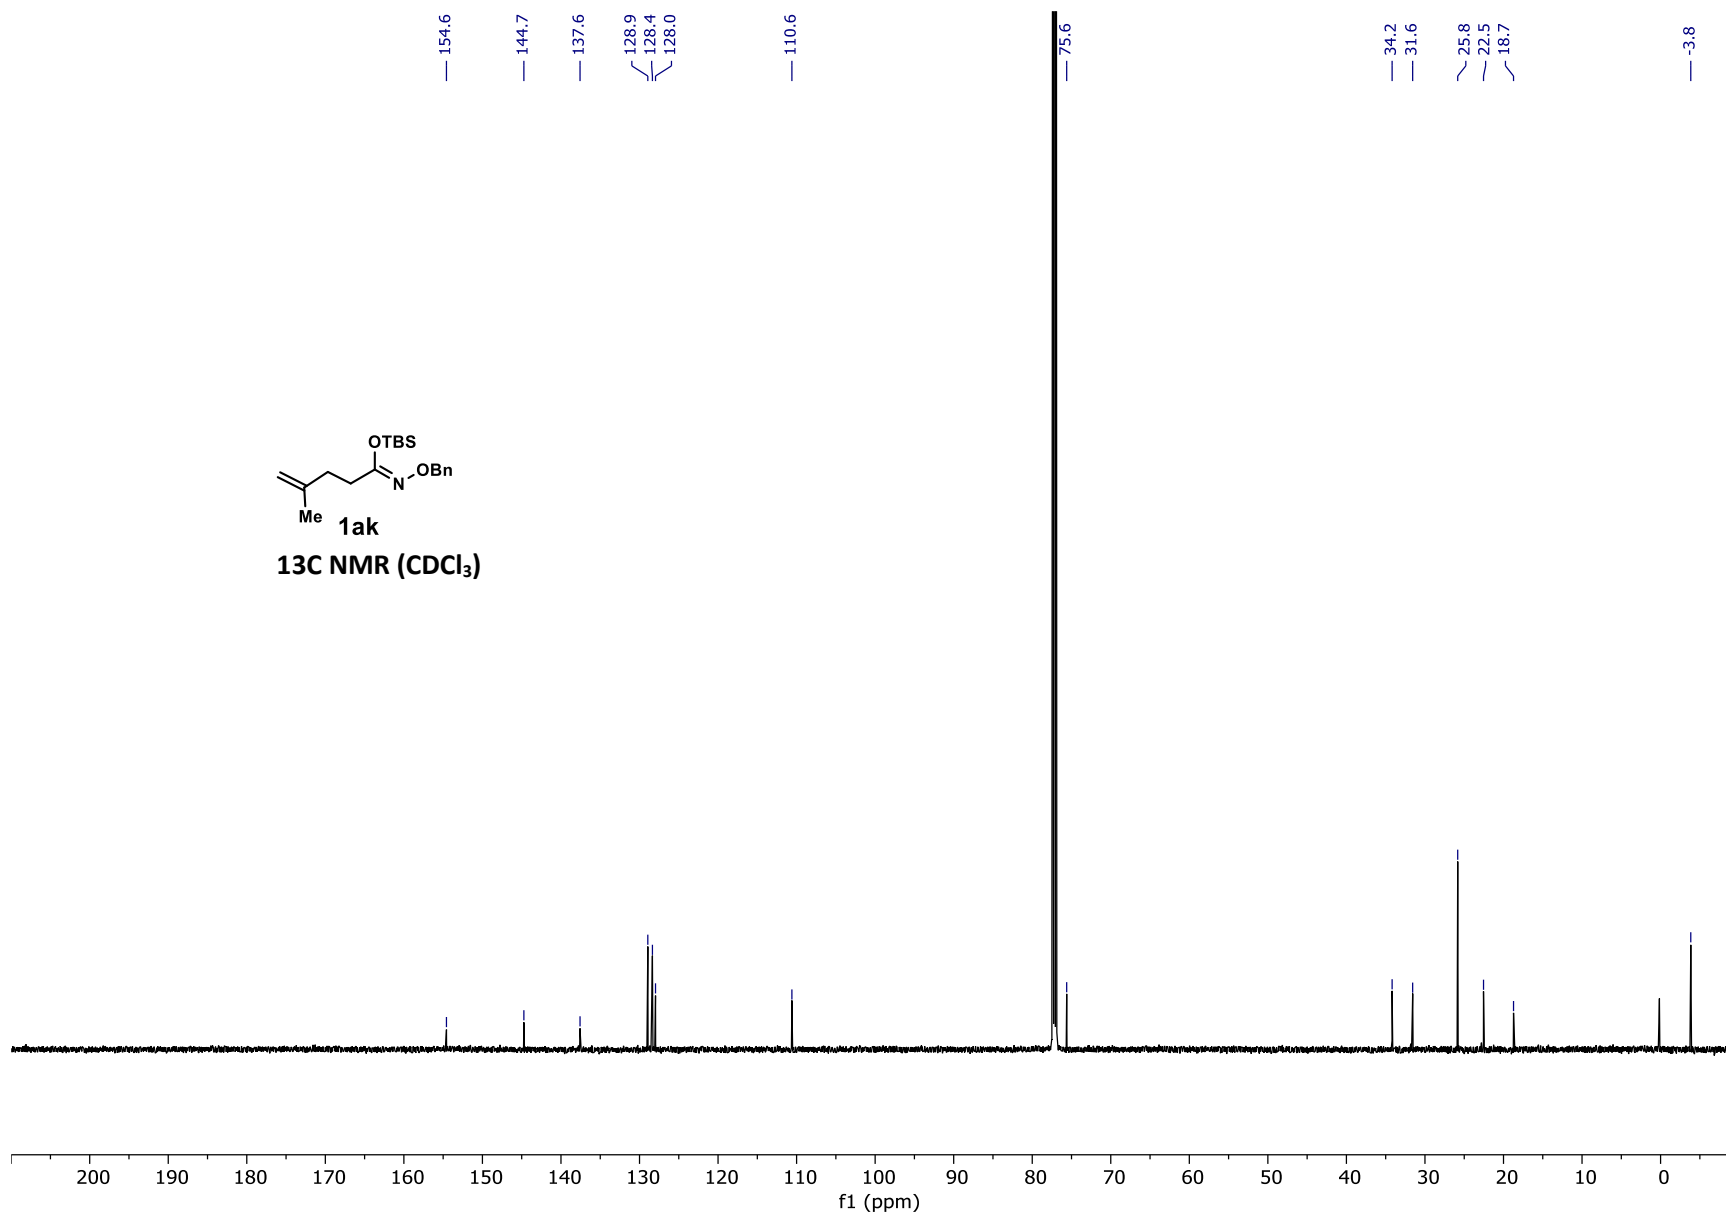

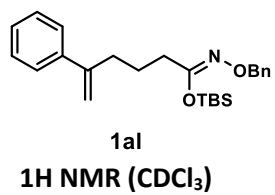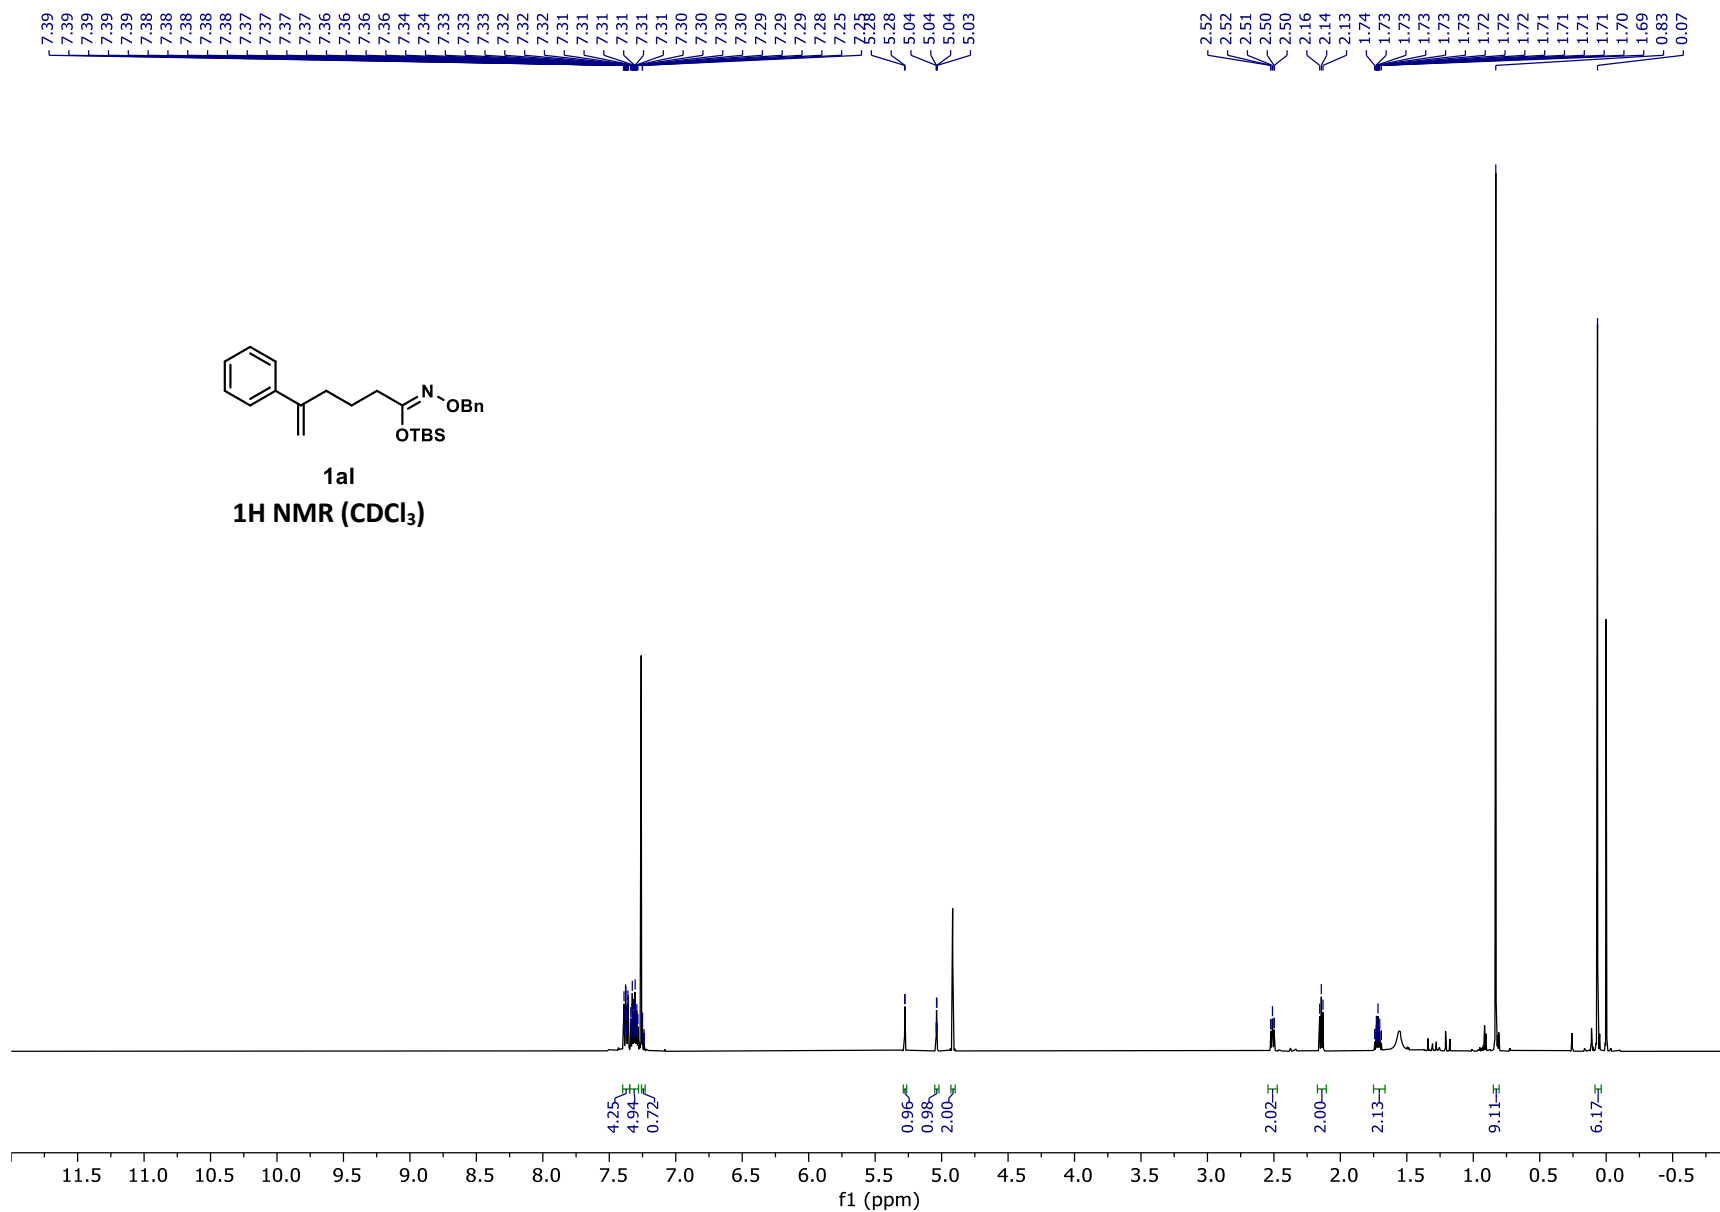

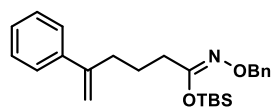

1al

$^{13}\text{C}$  NMR ( $\text{CDCl}_3$ )

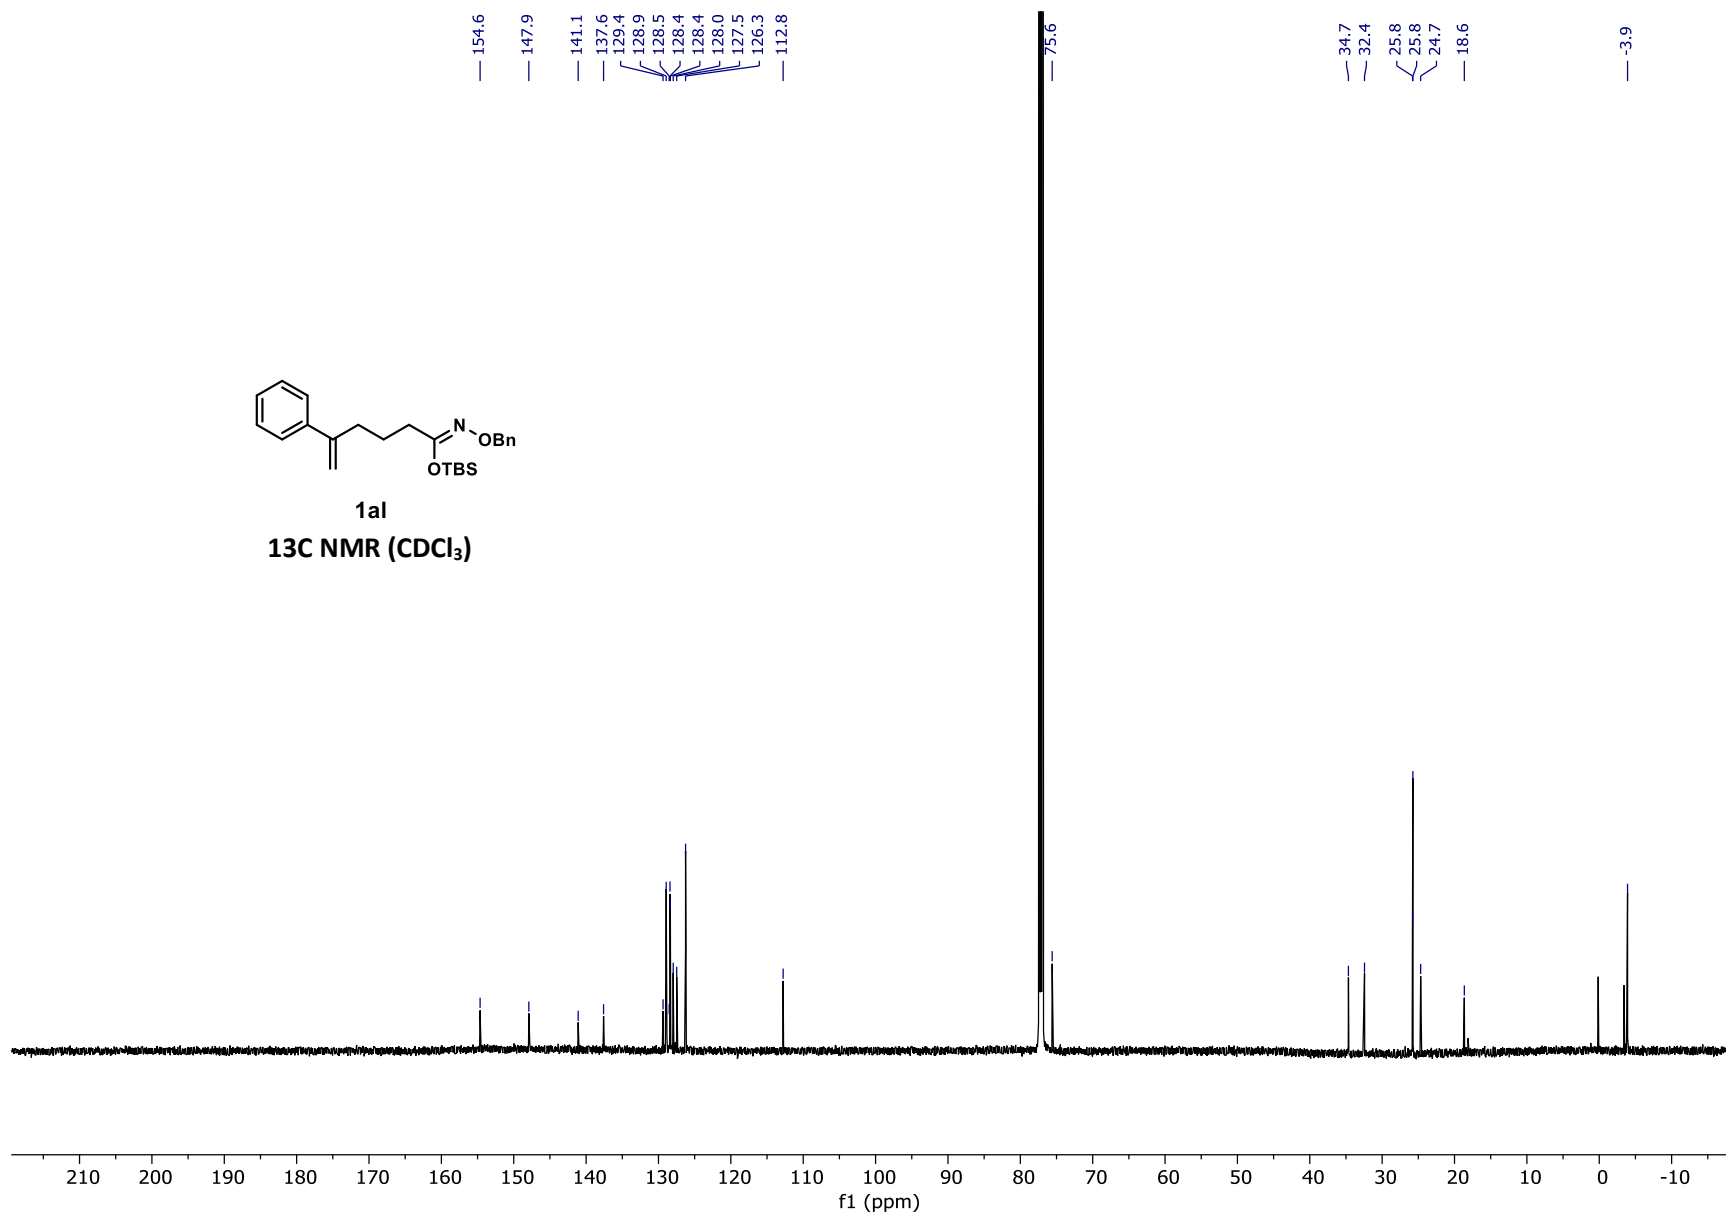

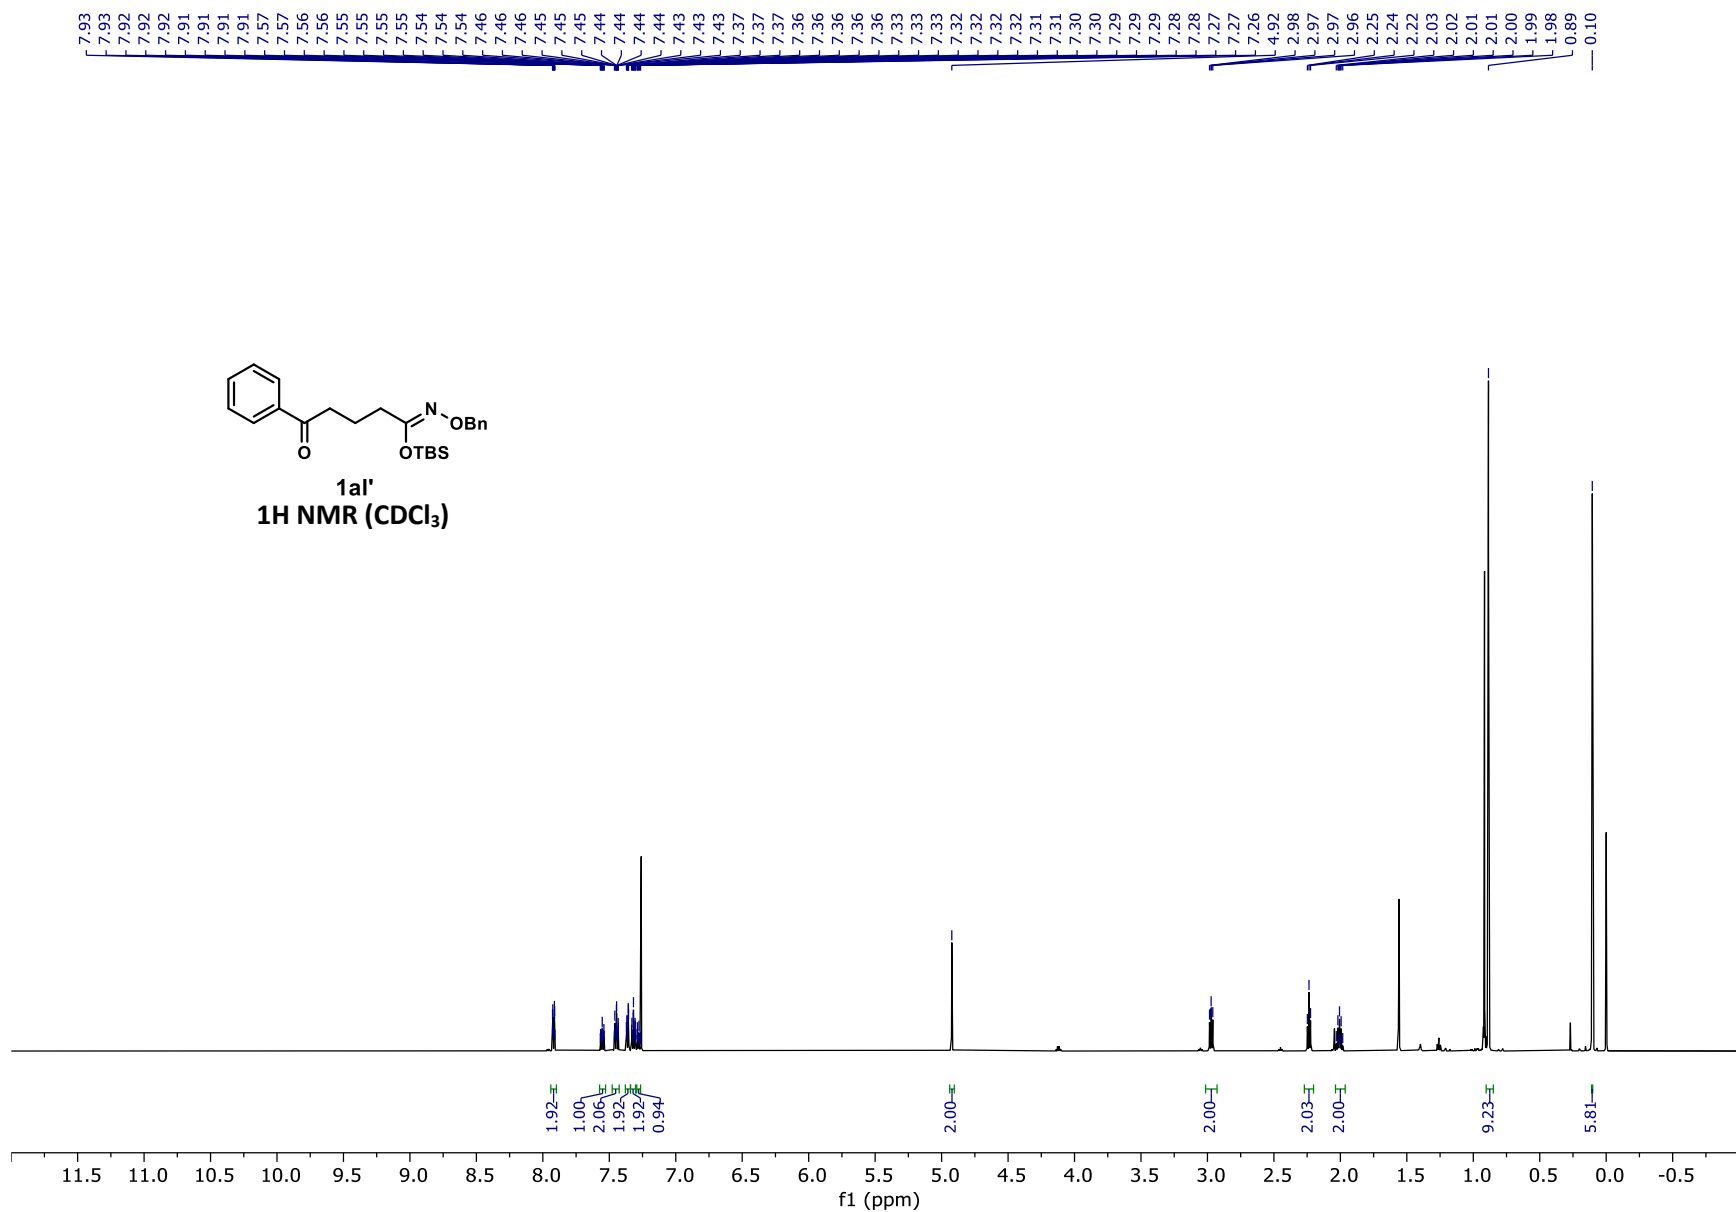

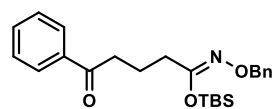

1a1'  
13C NMR (CDCl<sub>3</sub>)

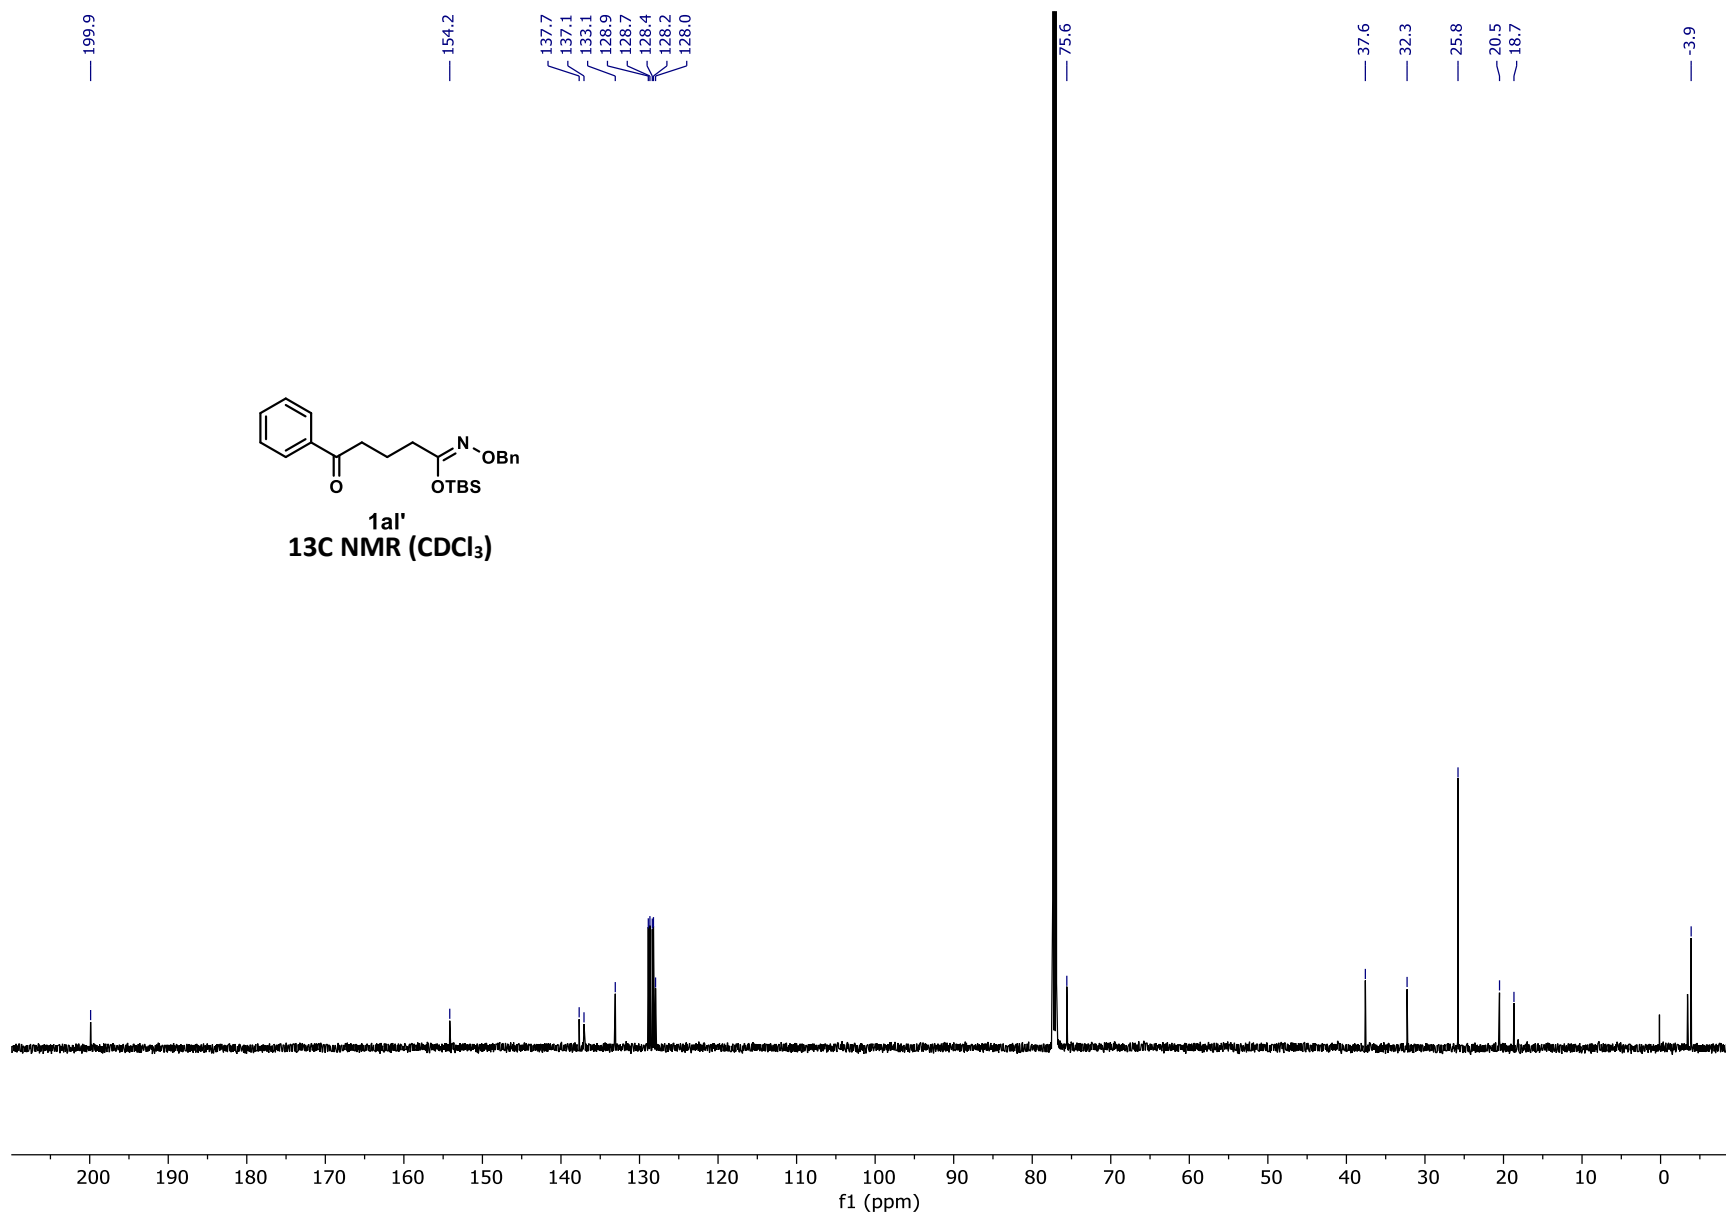



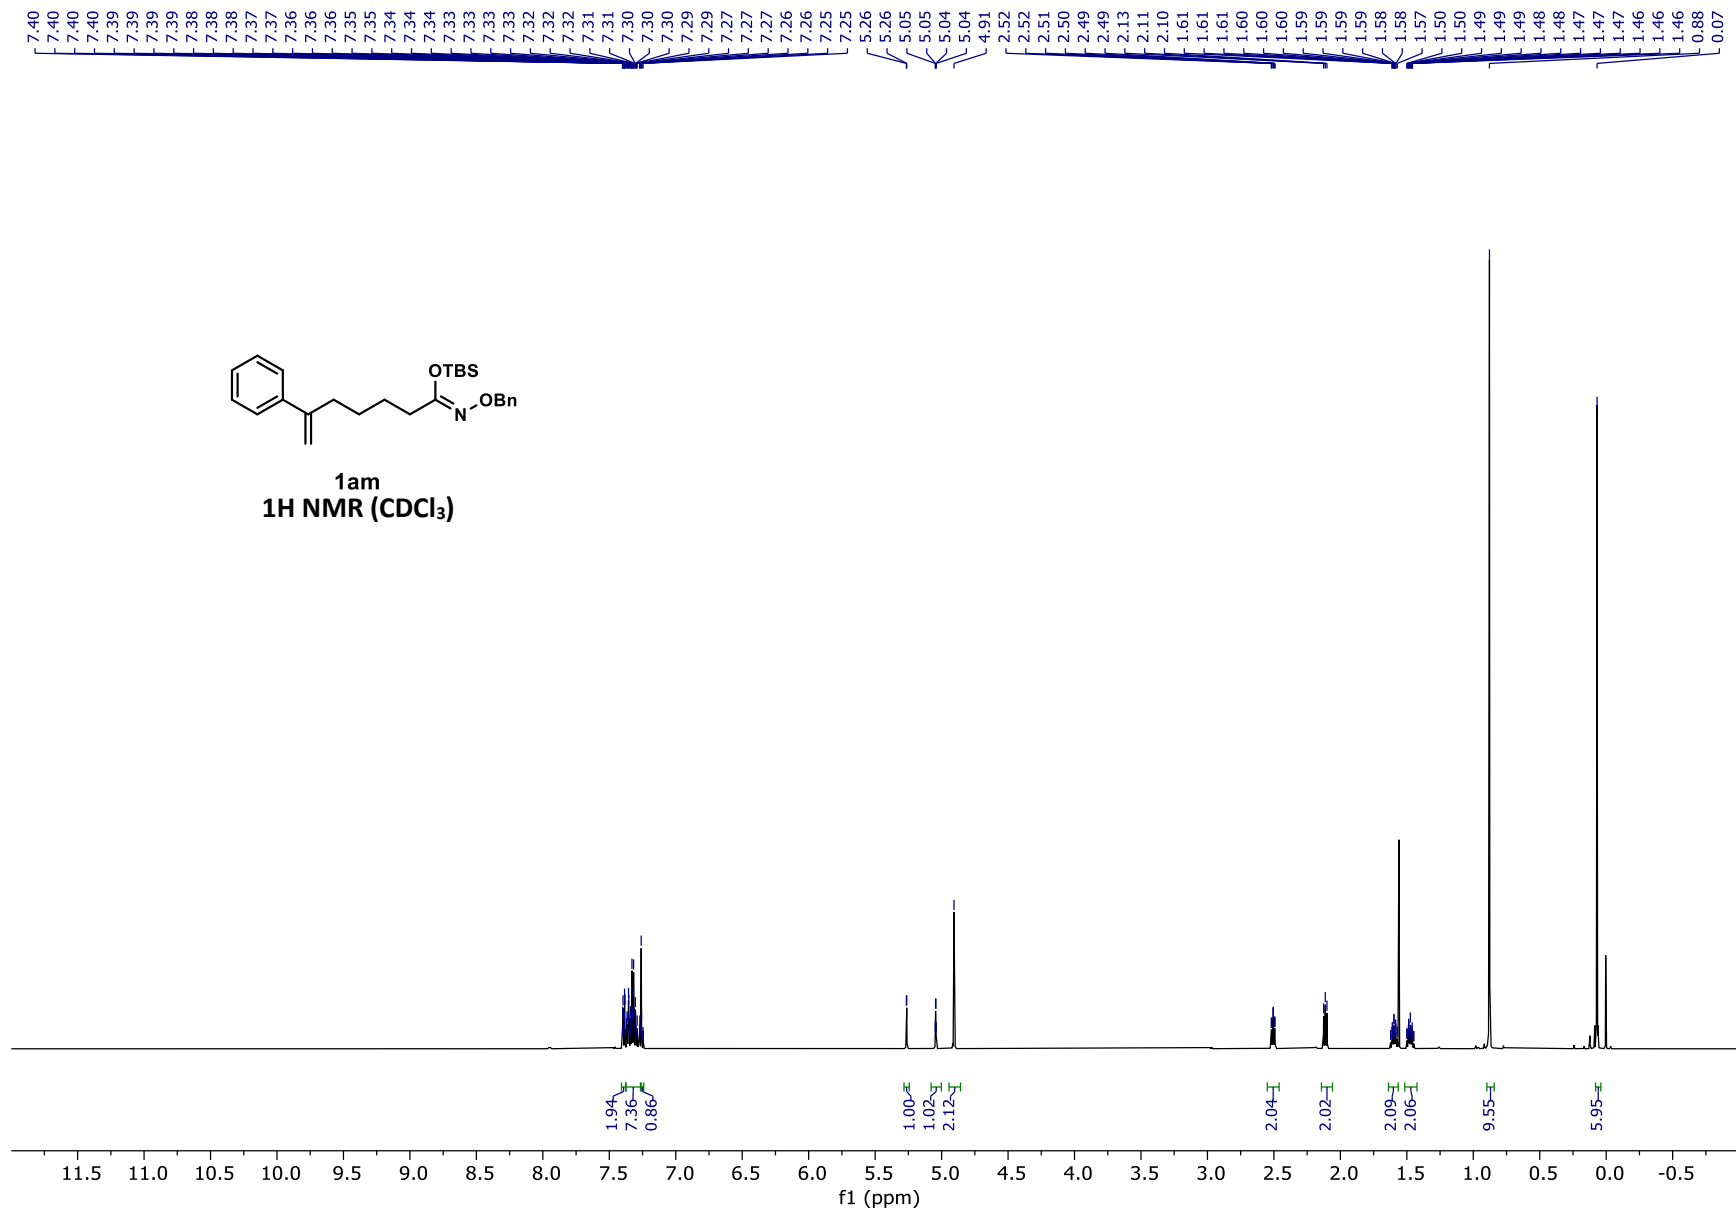

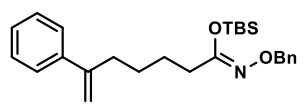

1am

<sup>13</sup>C NMR (CDCl<sub>3</sub>)

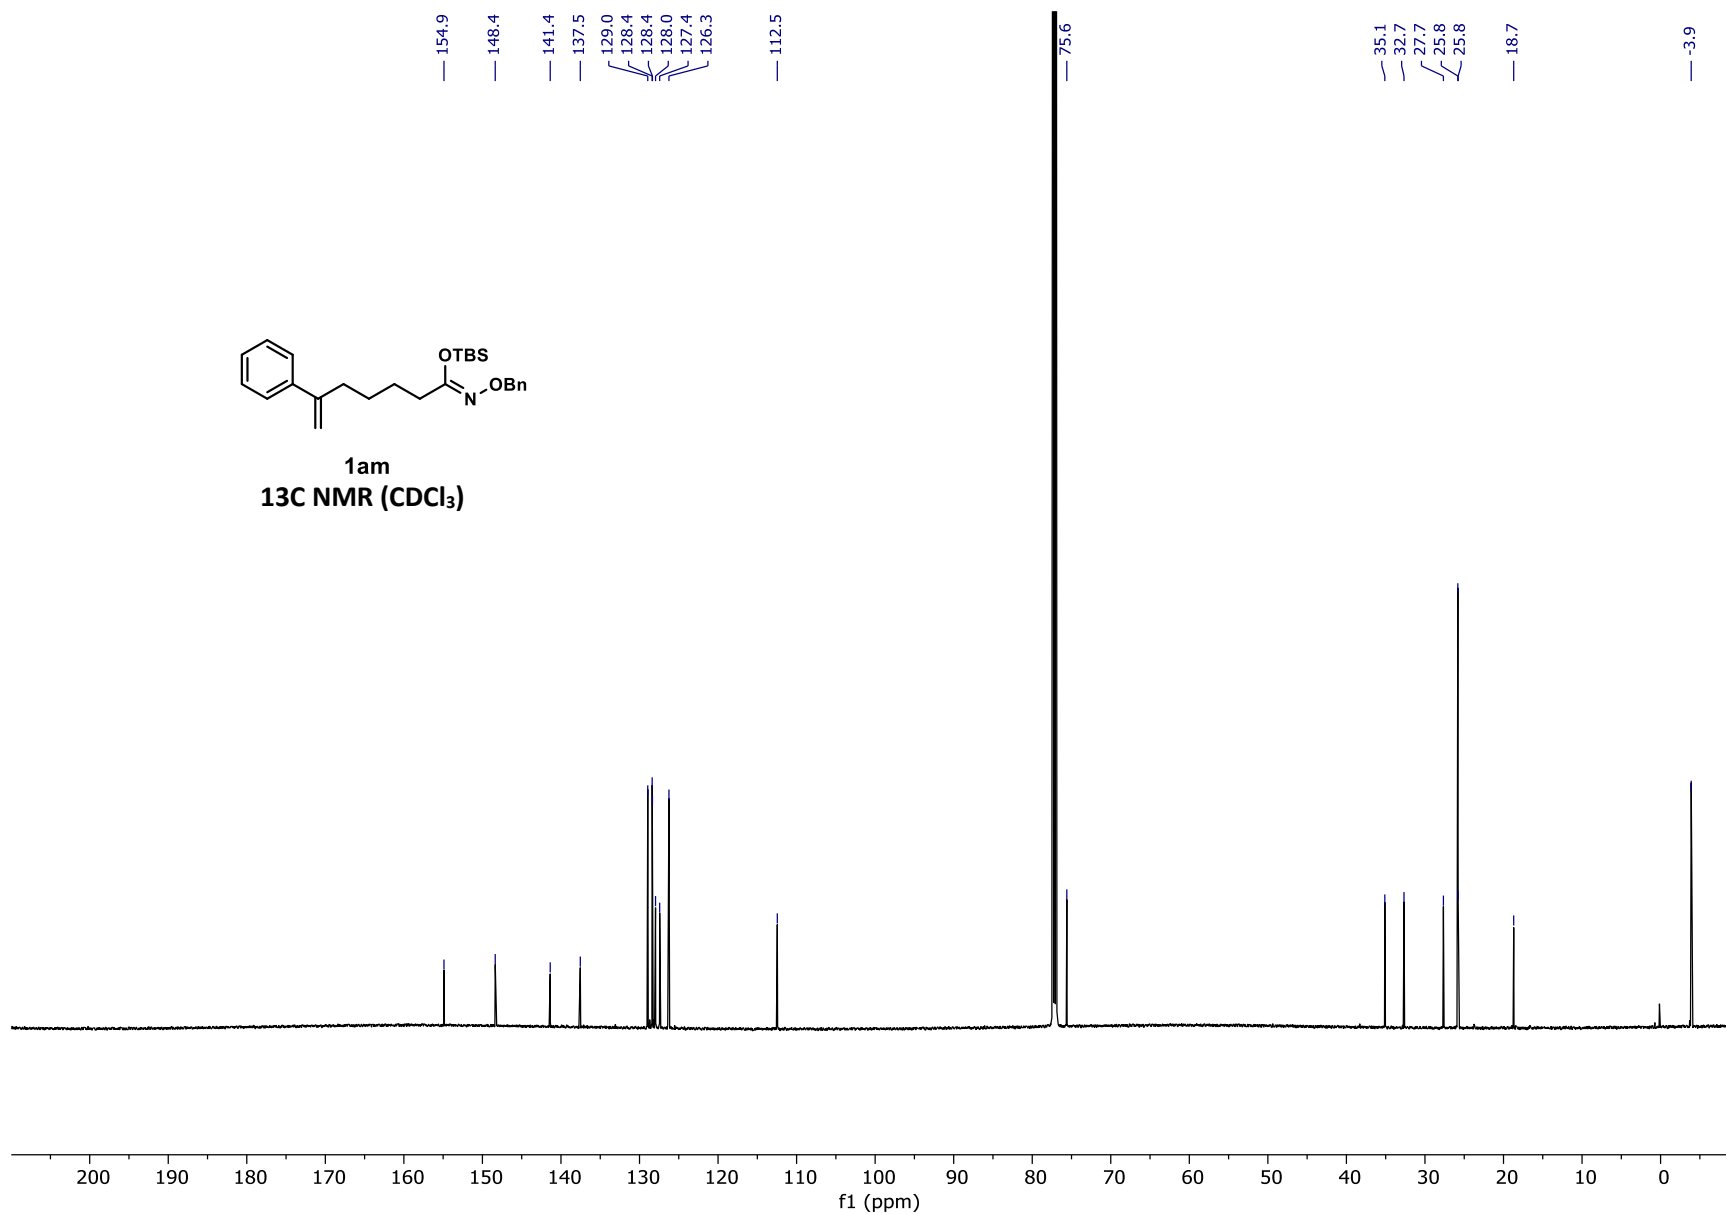

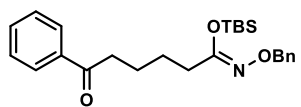

1am'  
1H NMR (CDCl<sub>3</sub>)

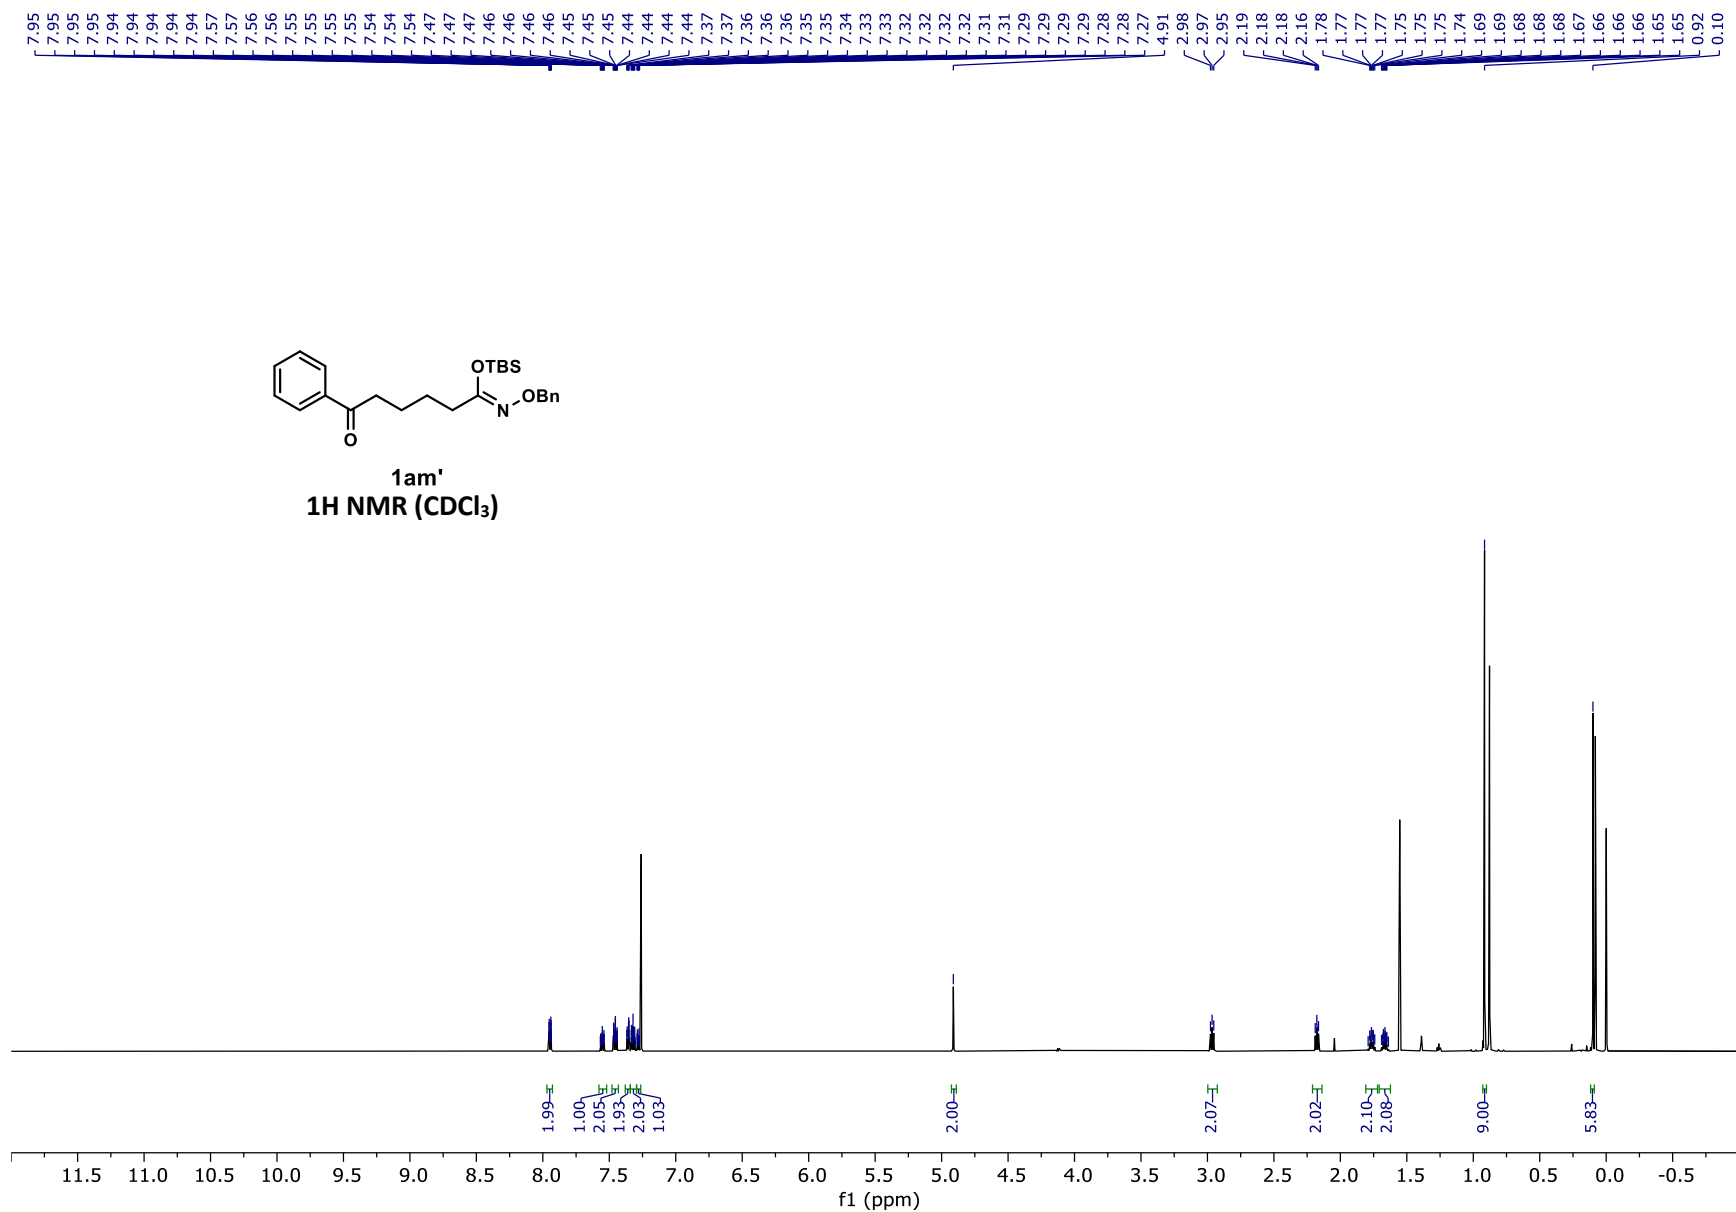

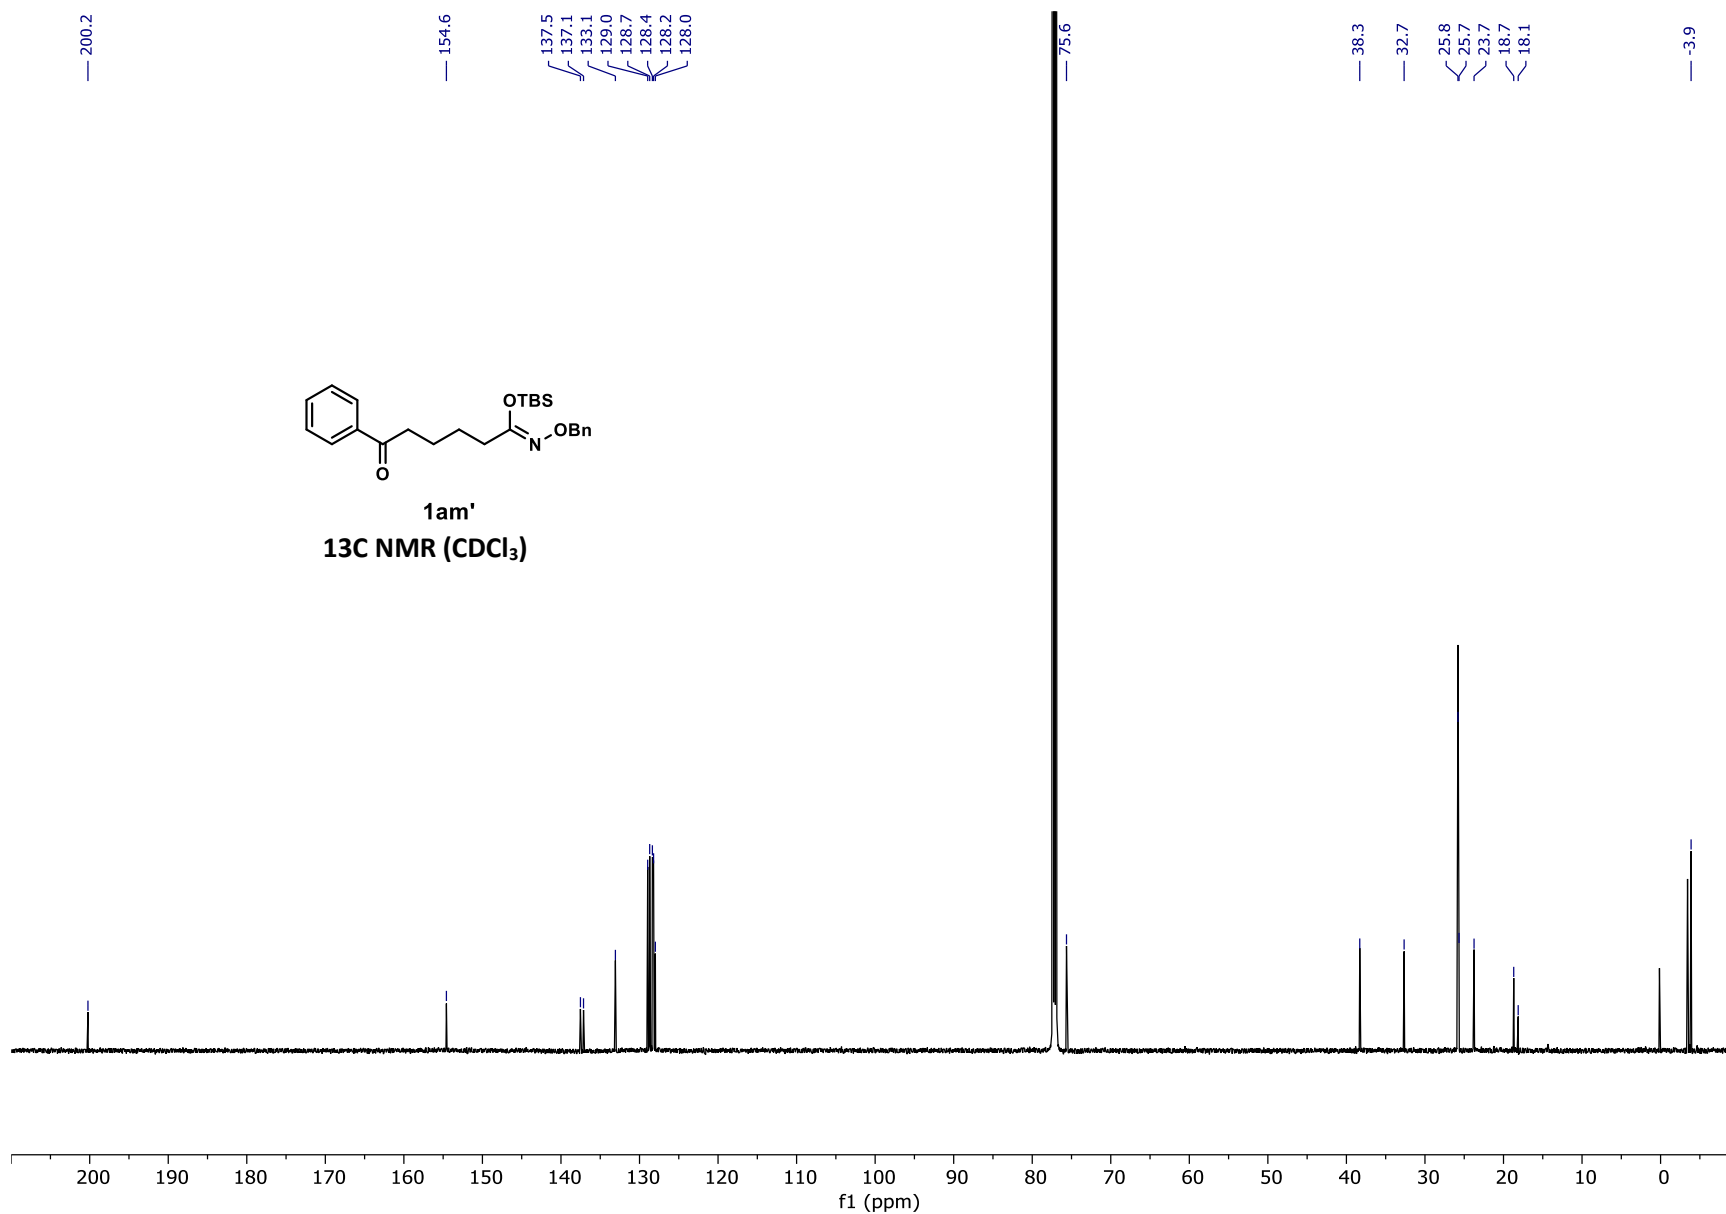

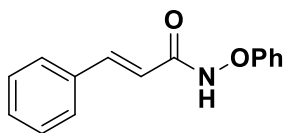

12e  
1H NMR (DMSO-d<sub>6</sub>)

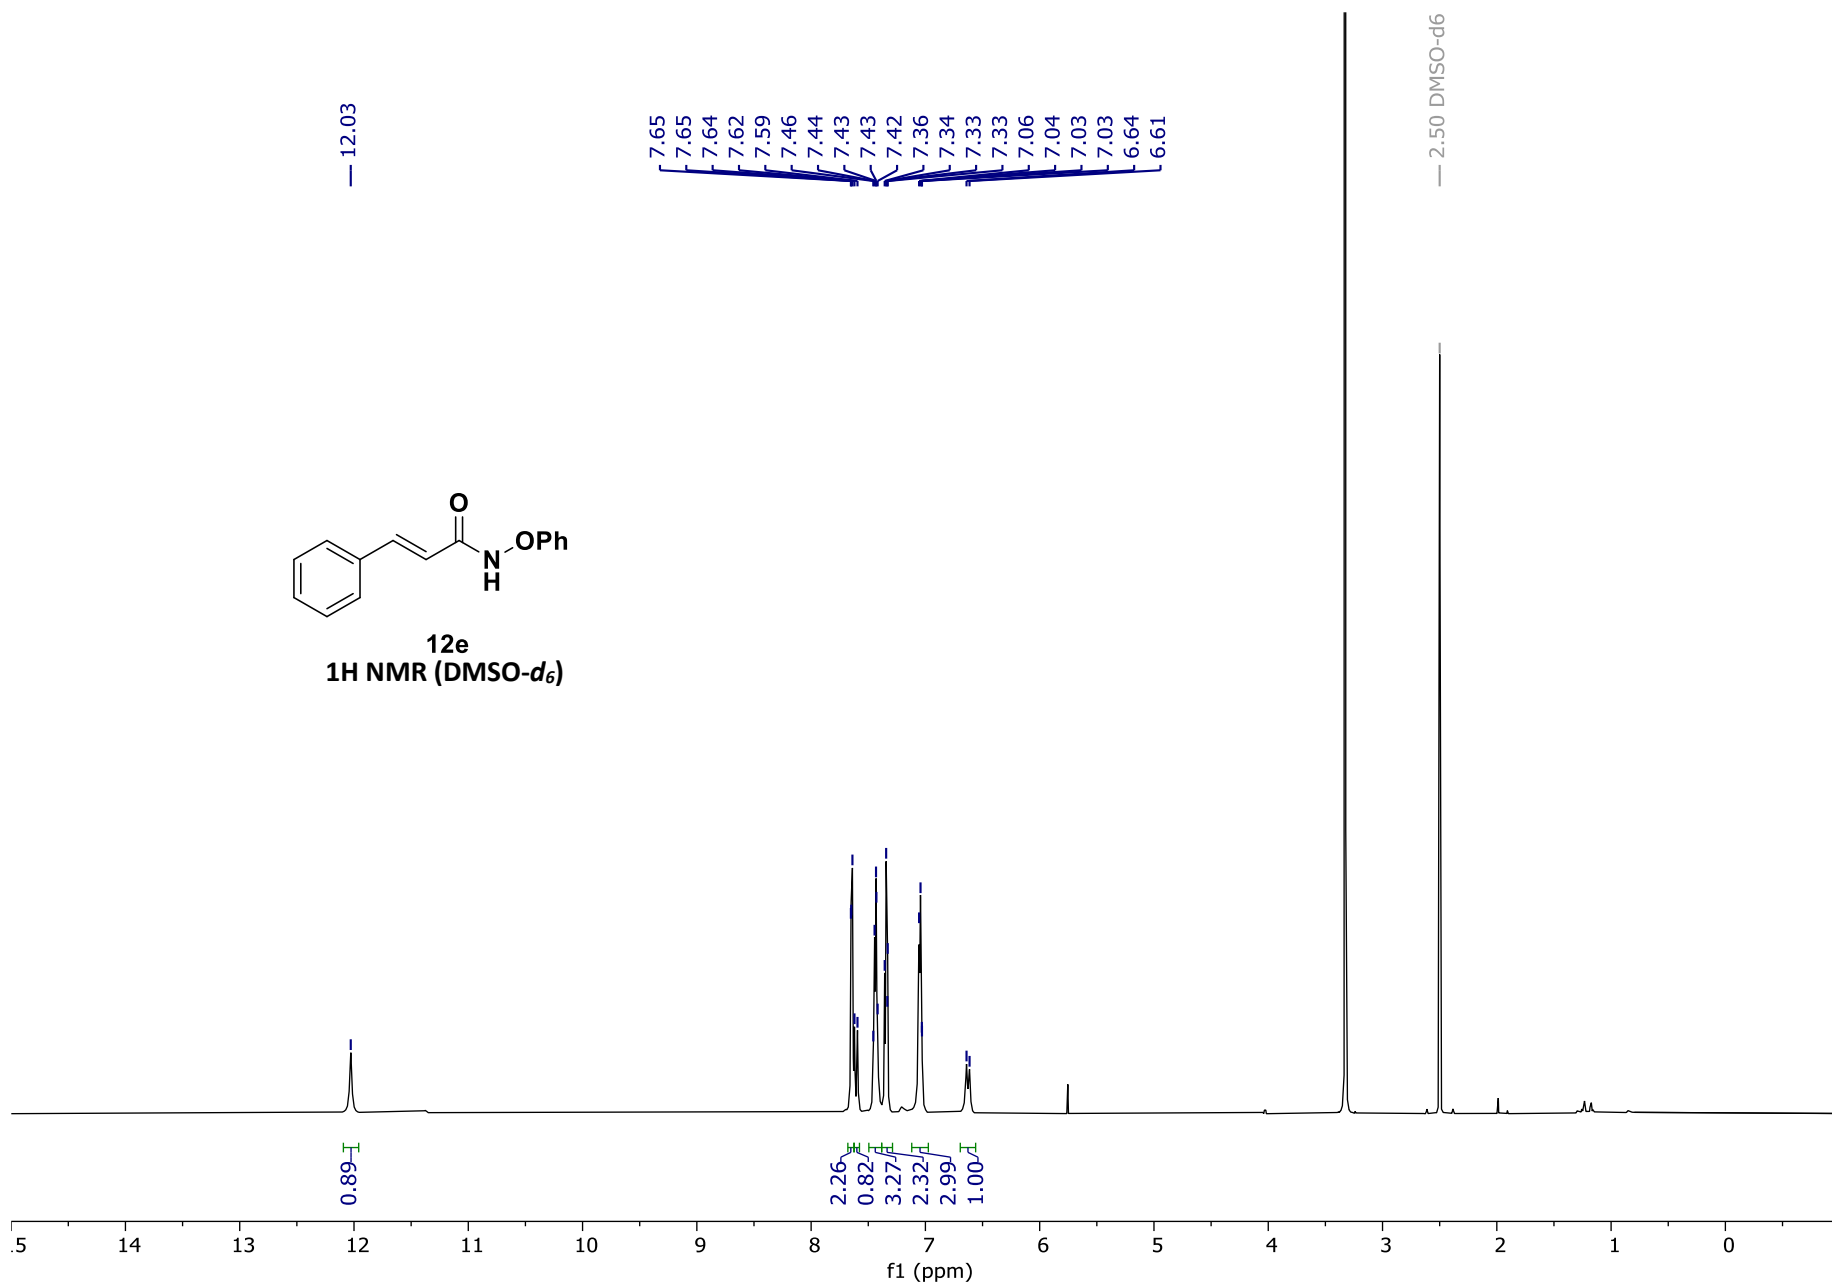

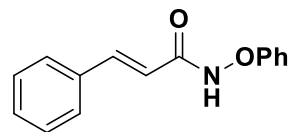

12e

<sup>13</sup>C NMR (DMSO-*d*<sub>6</sub>)

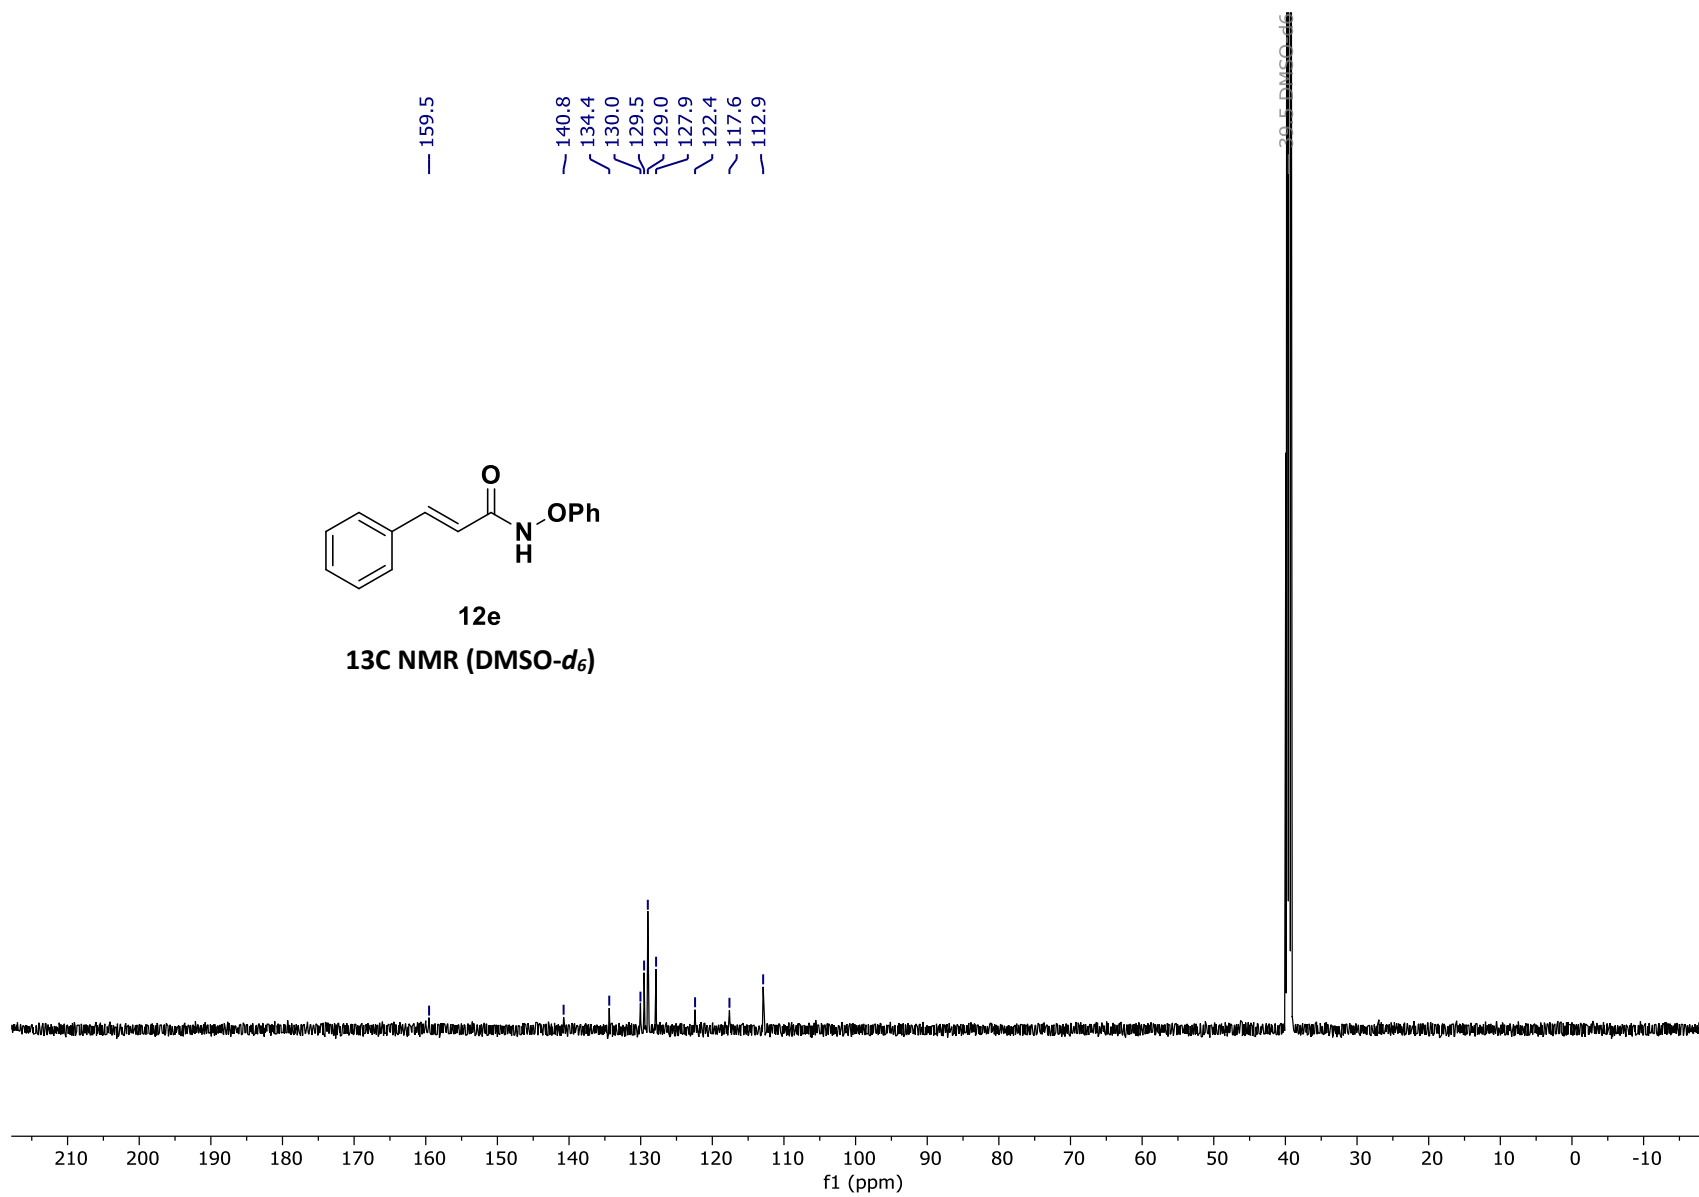

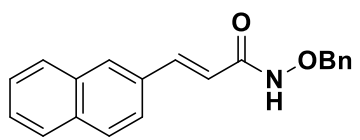

**12f**  
**<sup>1</sup>H NMR (DMSO-*d*<sub>6</sub>)**

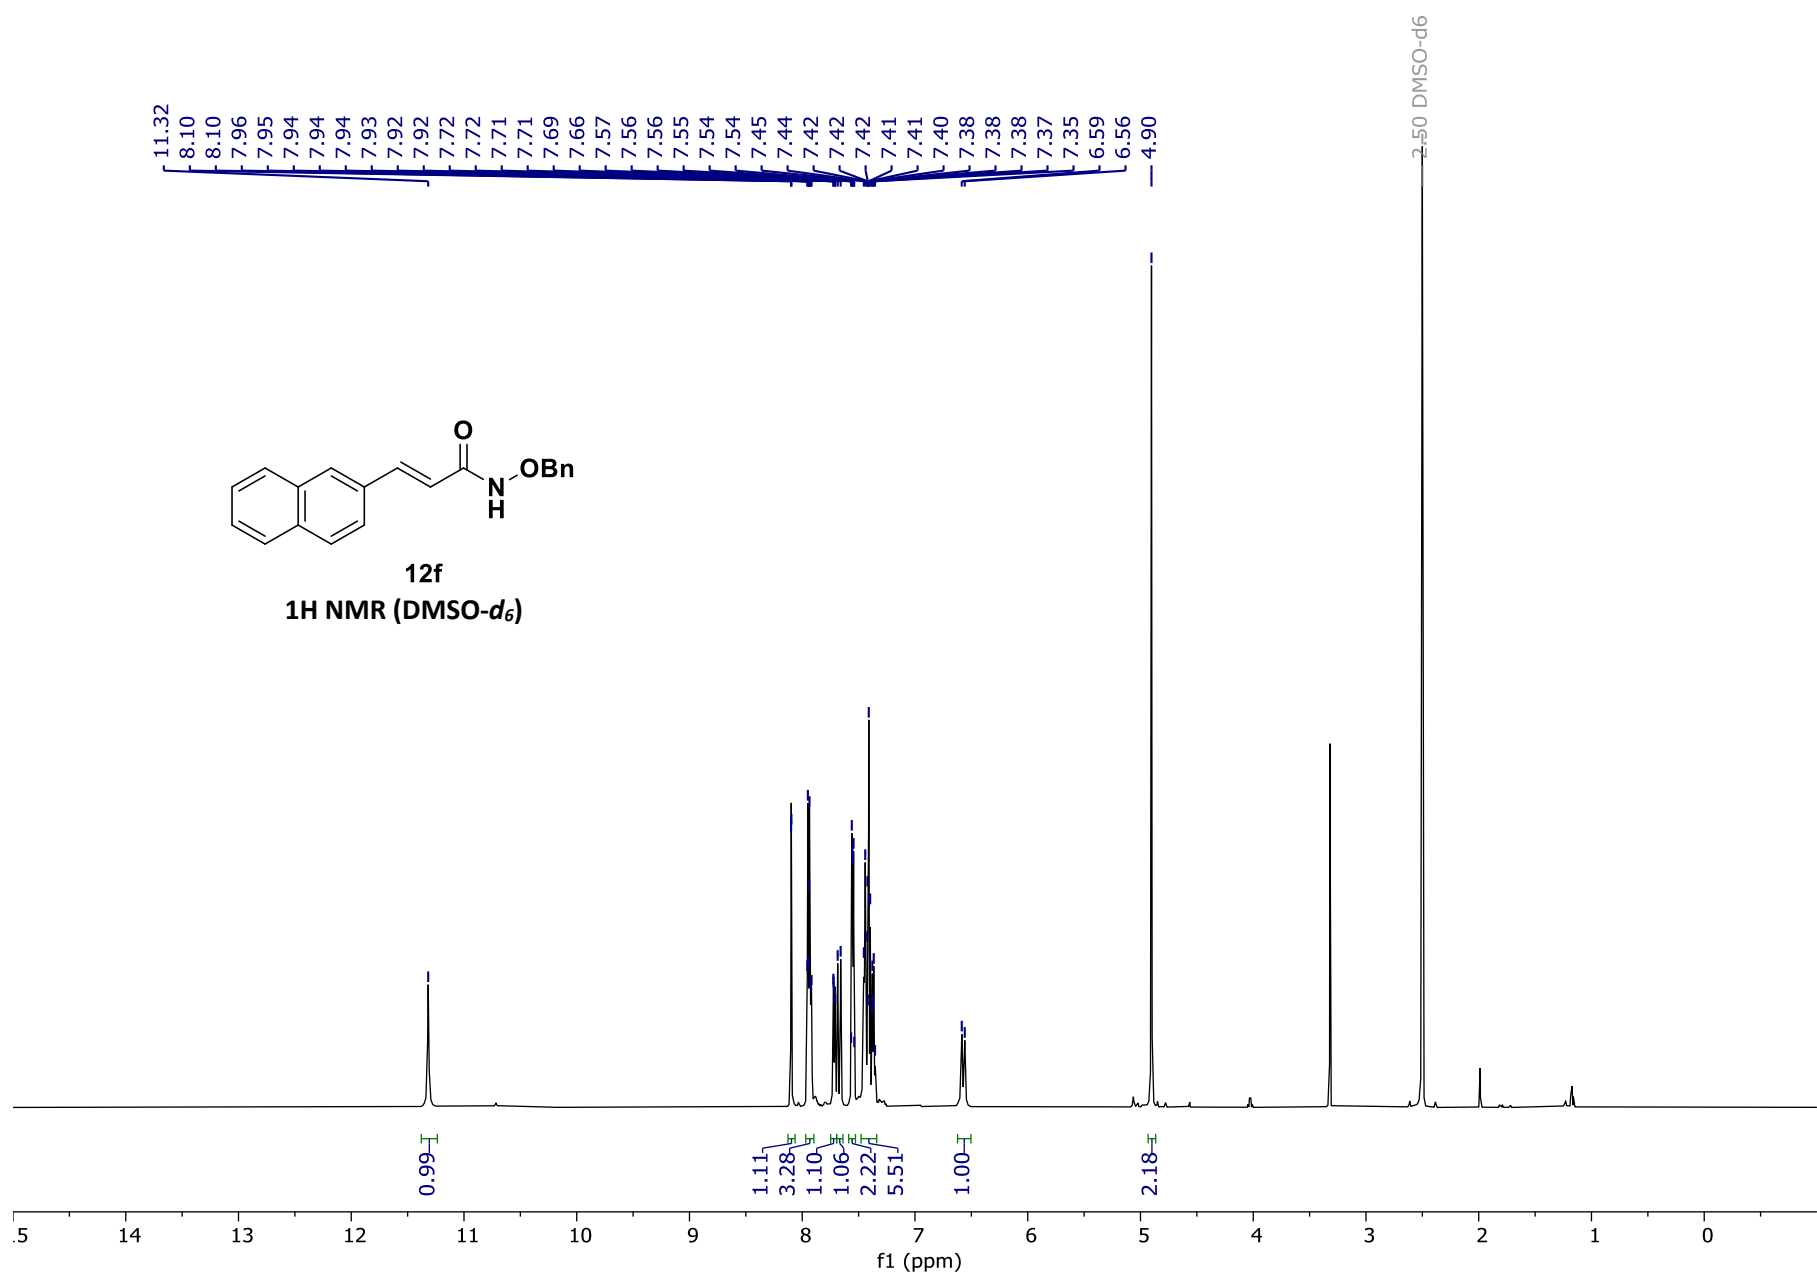

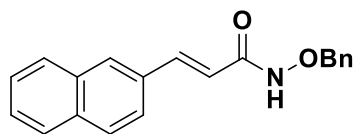

12f

<sup>13</sup>C NMR (DMSO-*d*<sub>6</sub>)

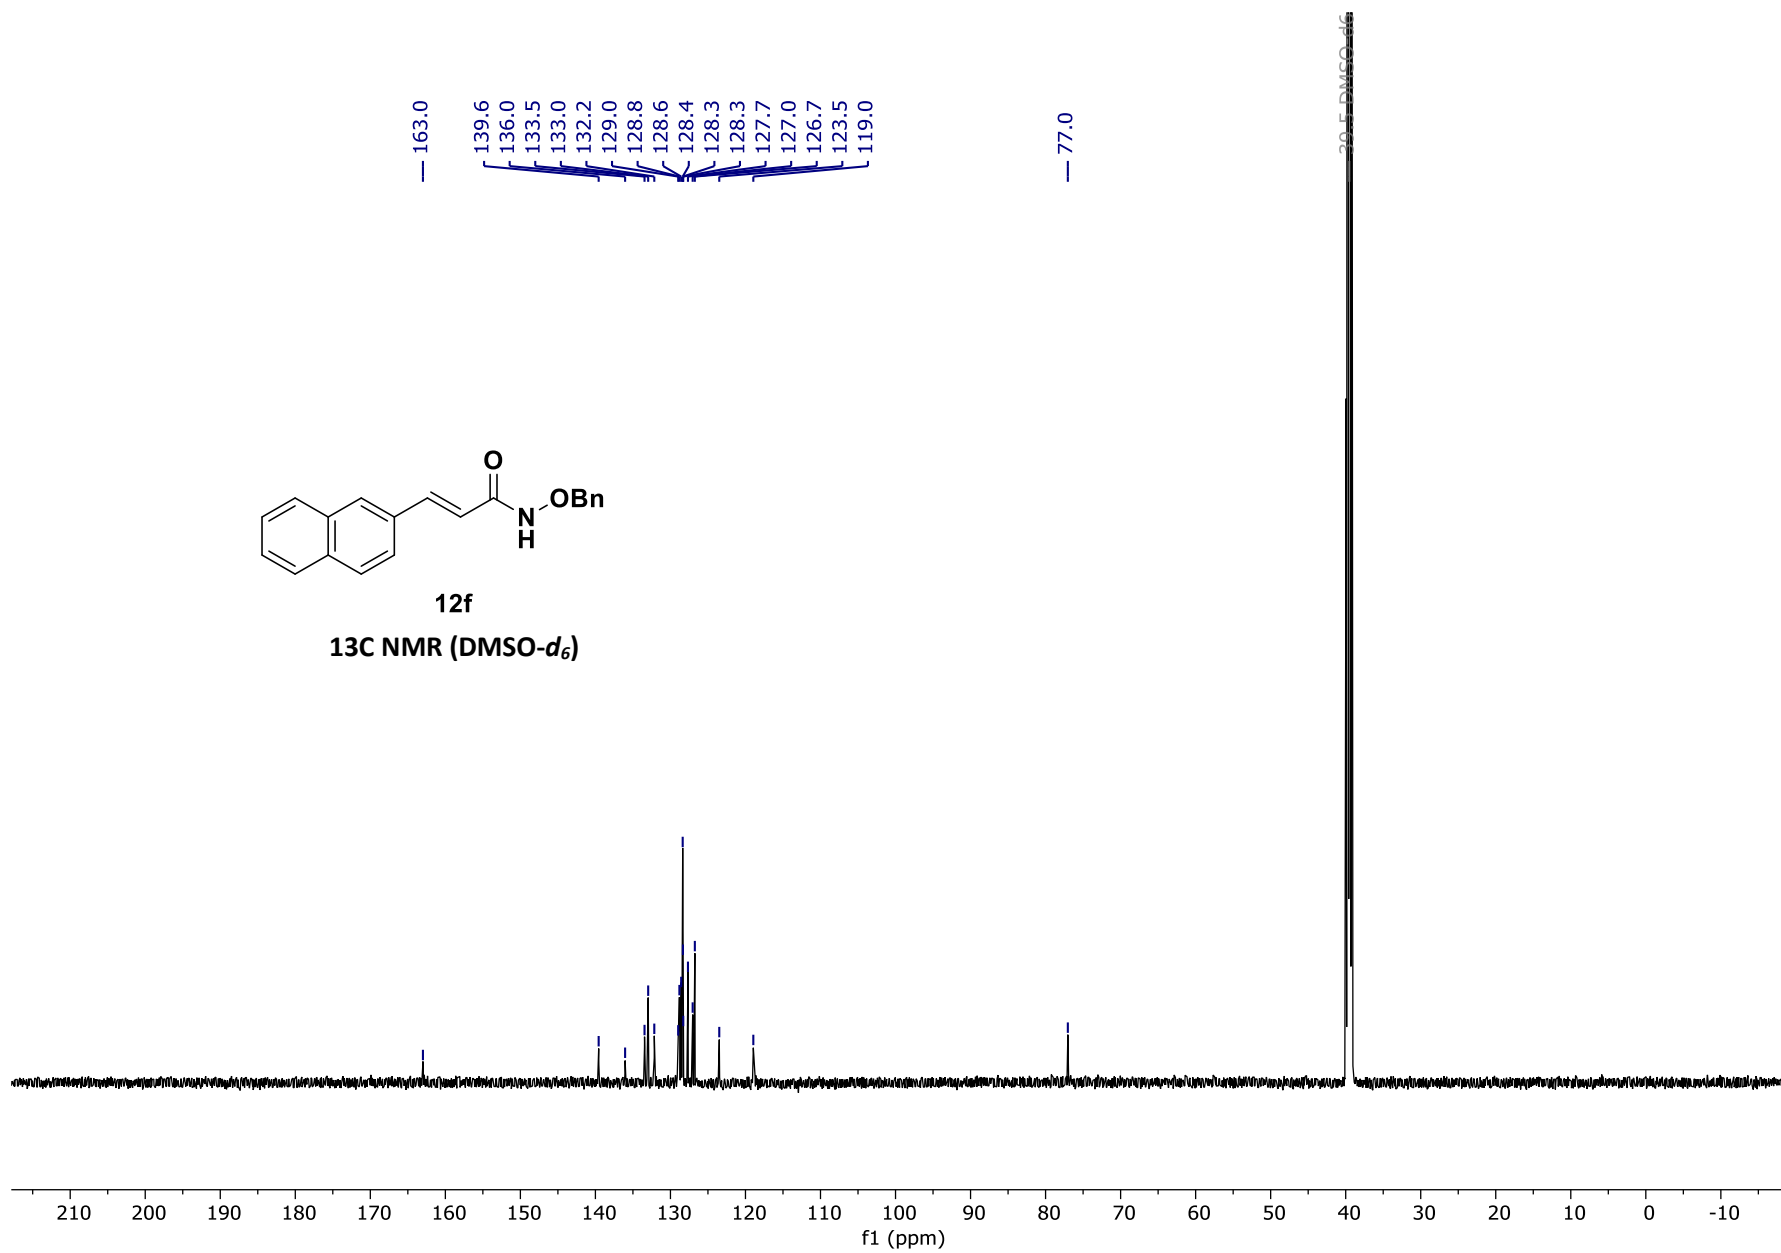



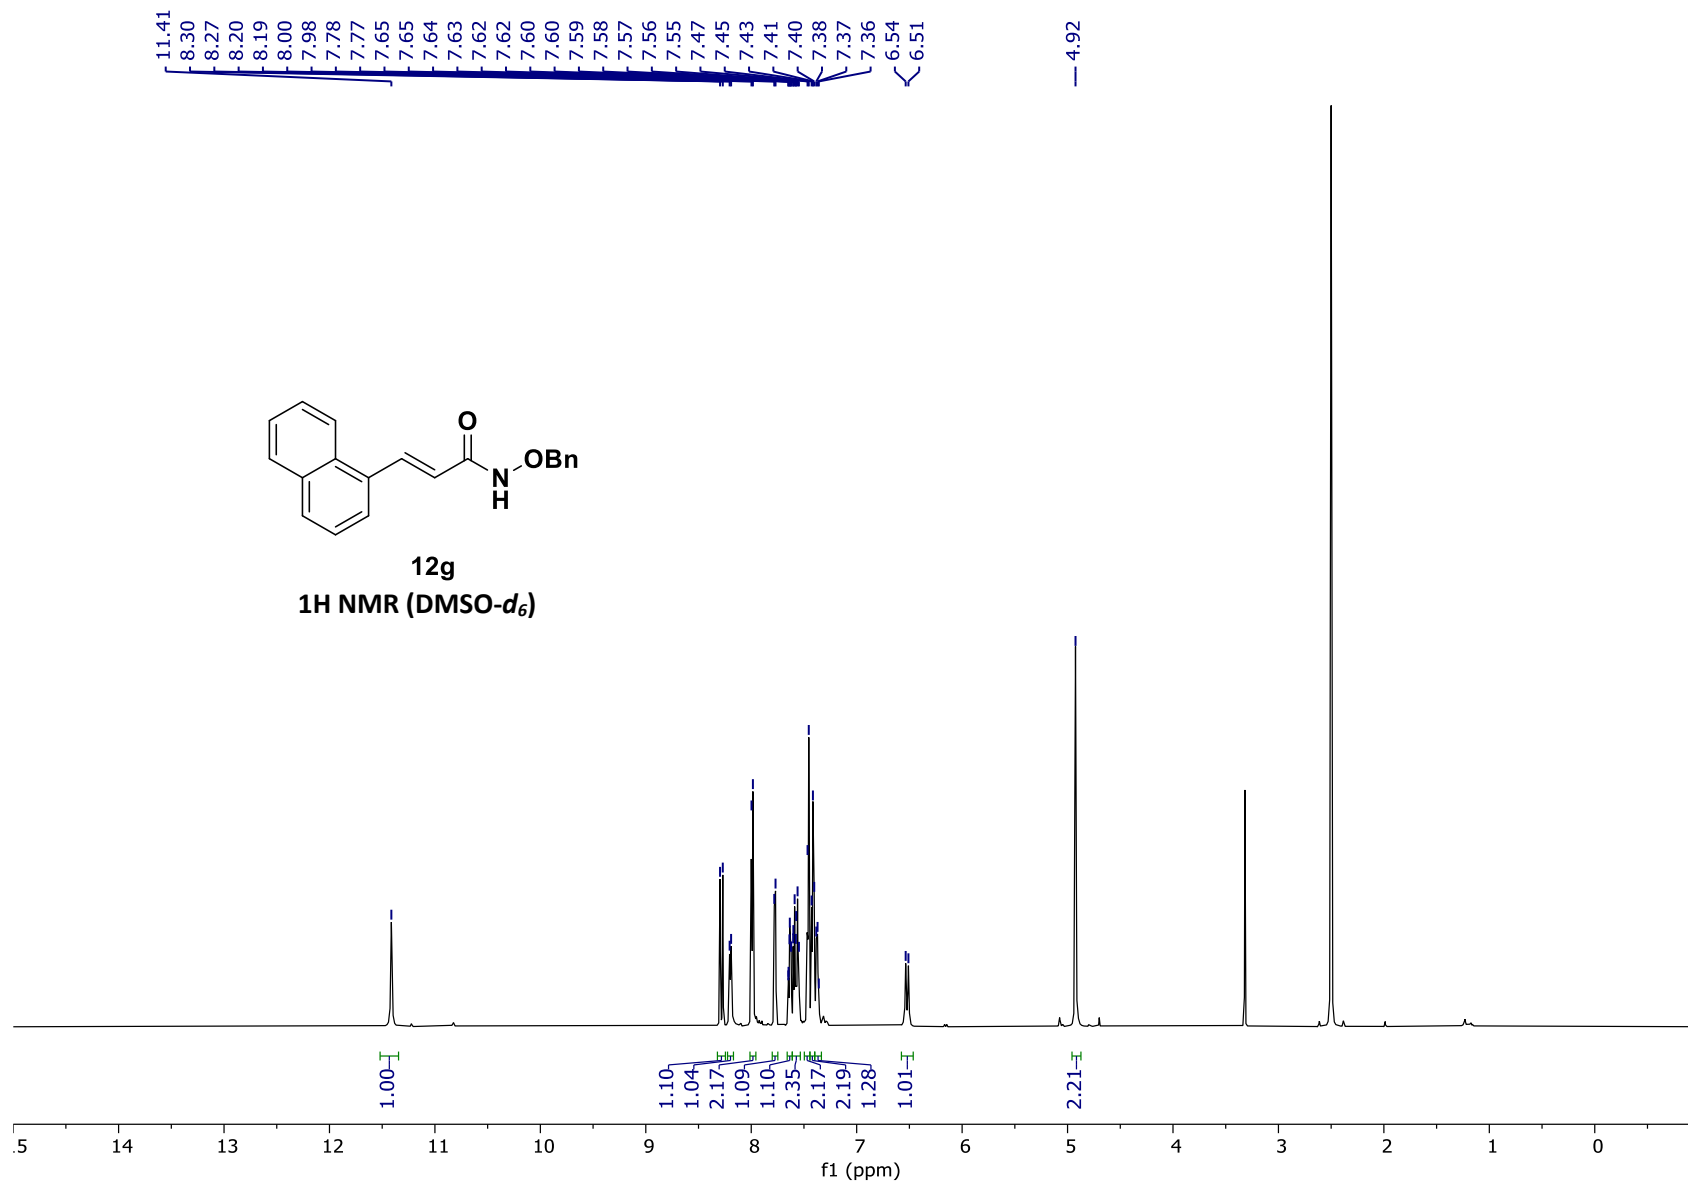

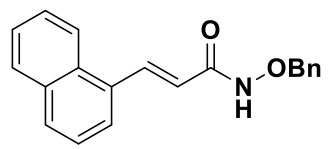

**12g**  
**<sup>13</sup>C NMR (DMSO-*d*<sub>6</sub>)**

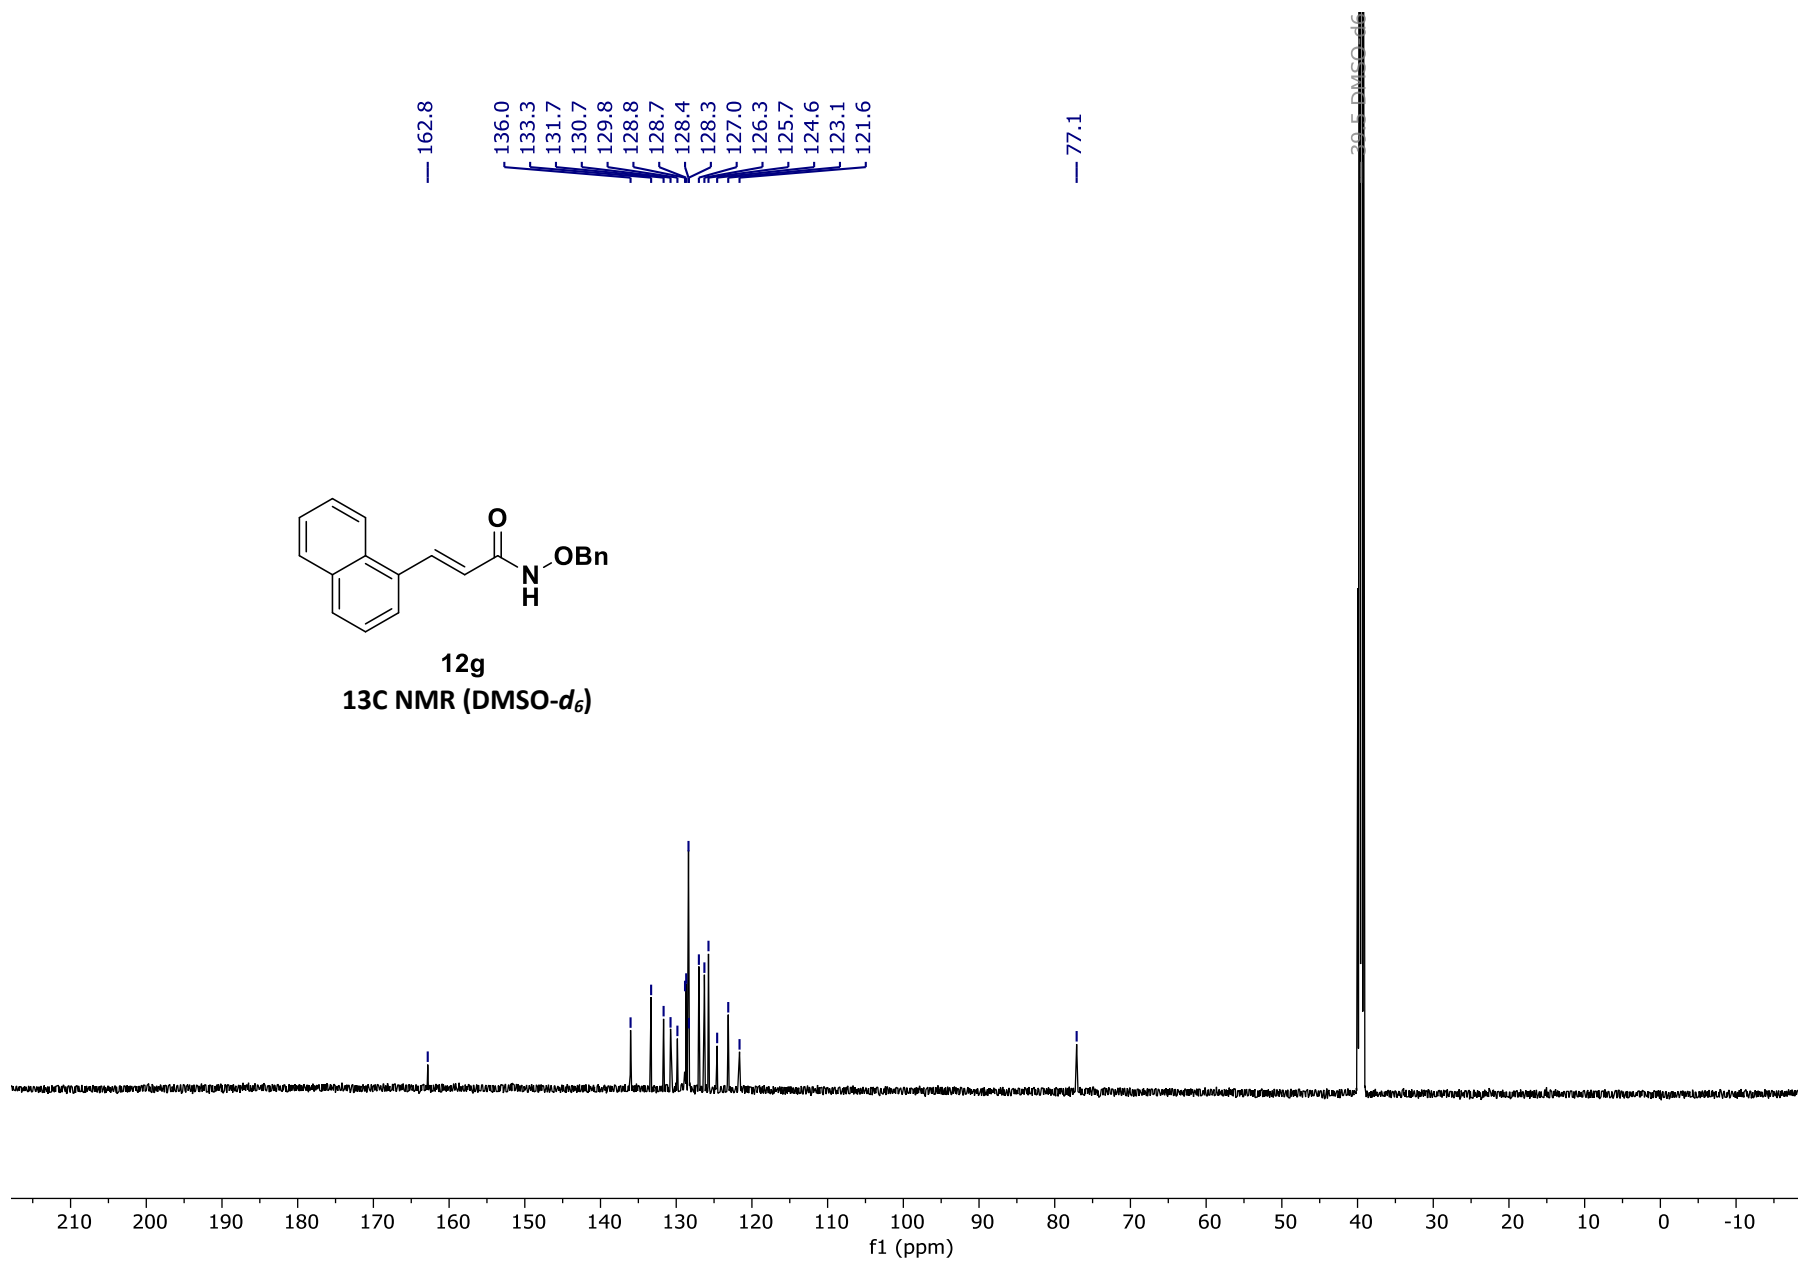

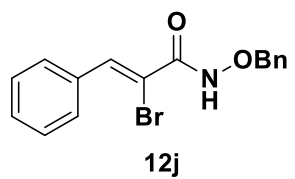

<sup>1</sup>H NMR (CDCl<sub>3</sub>)

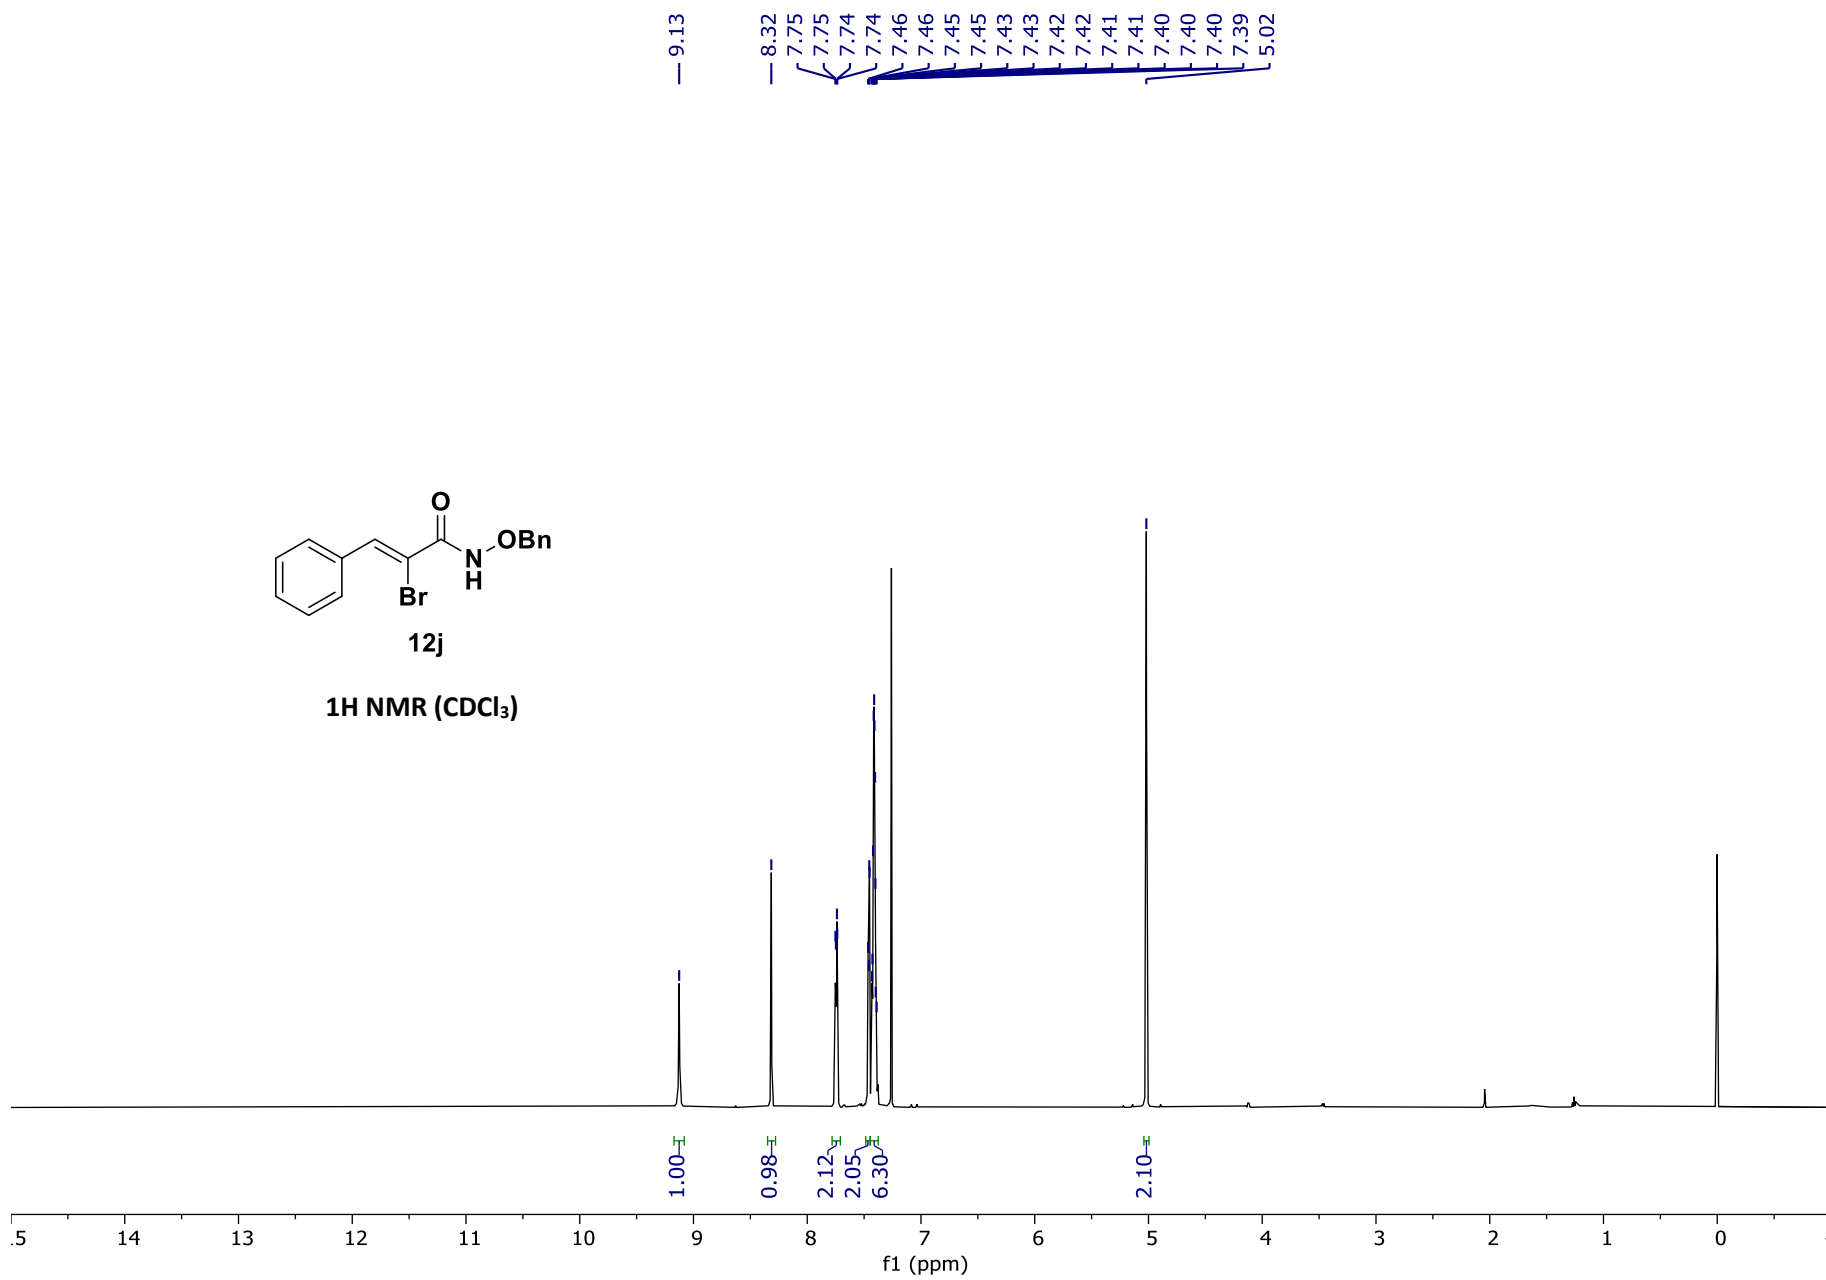

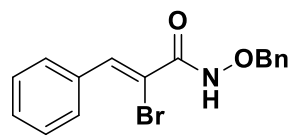

12j

<sup>13</sup>C NMR (CDCl<sub>3</sub>)

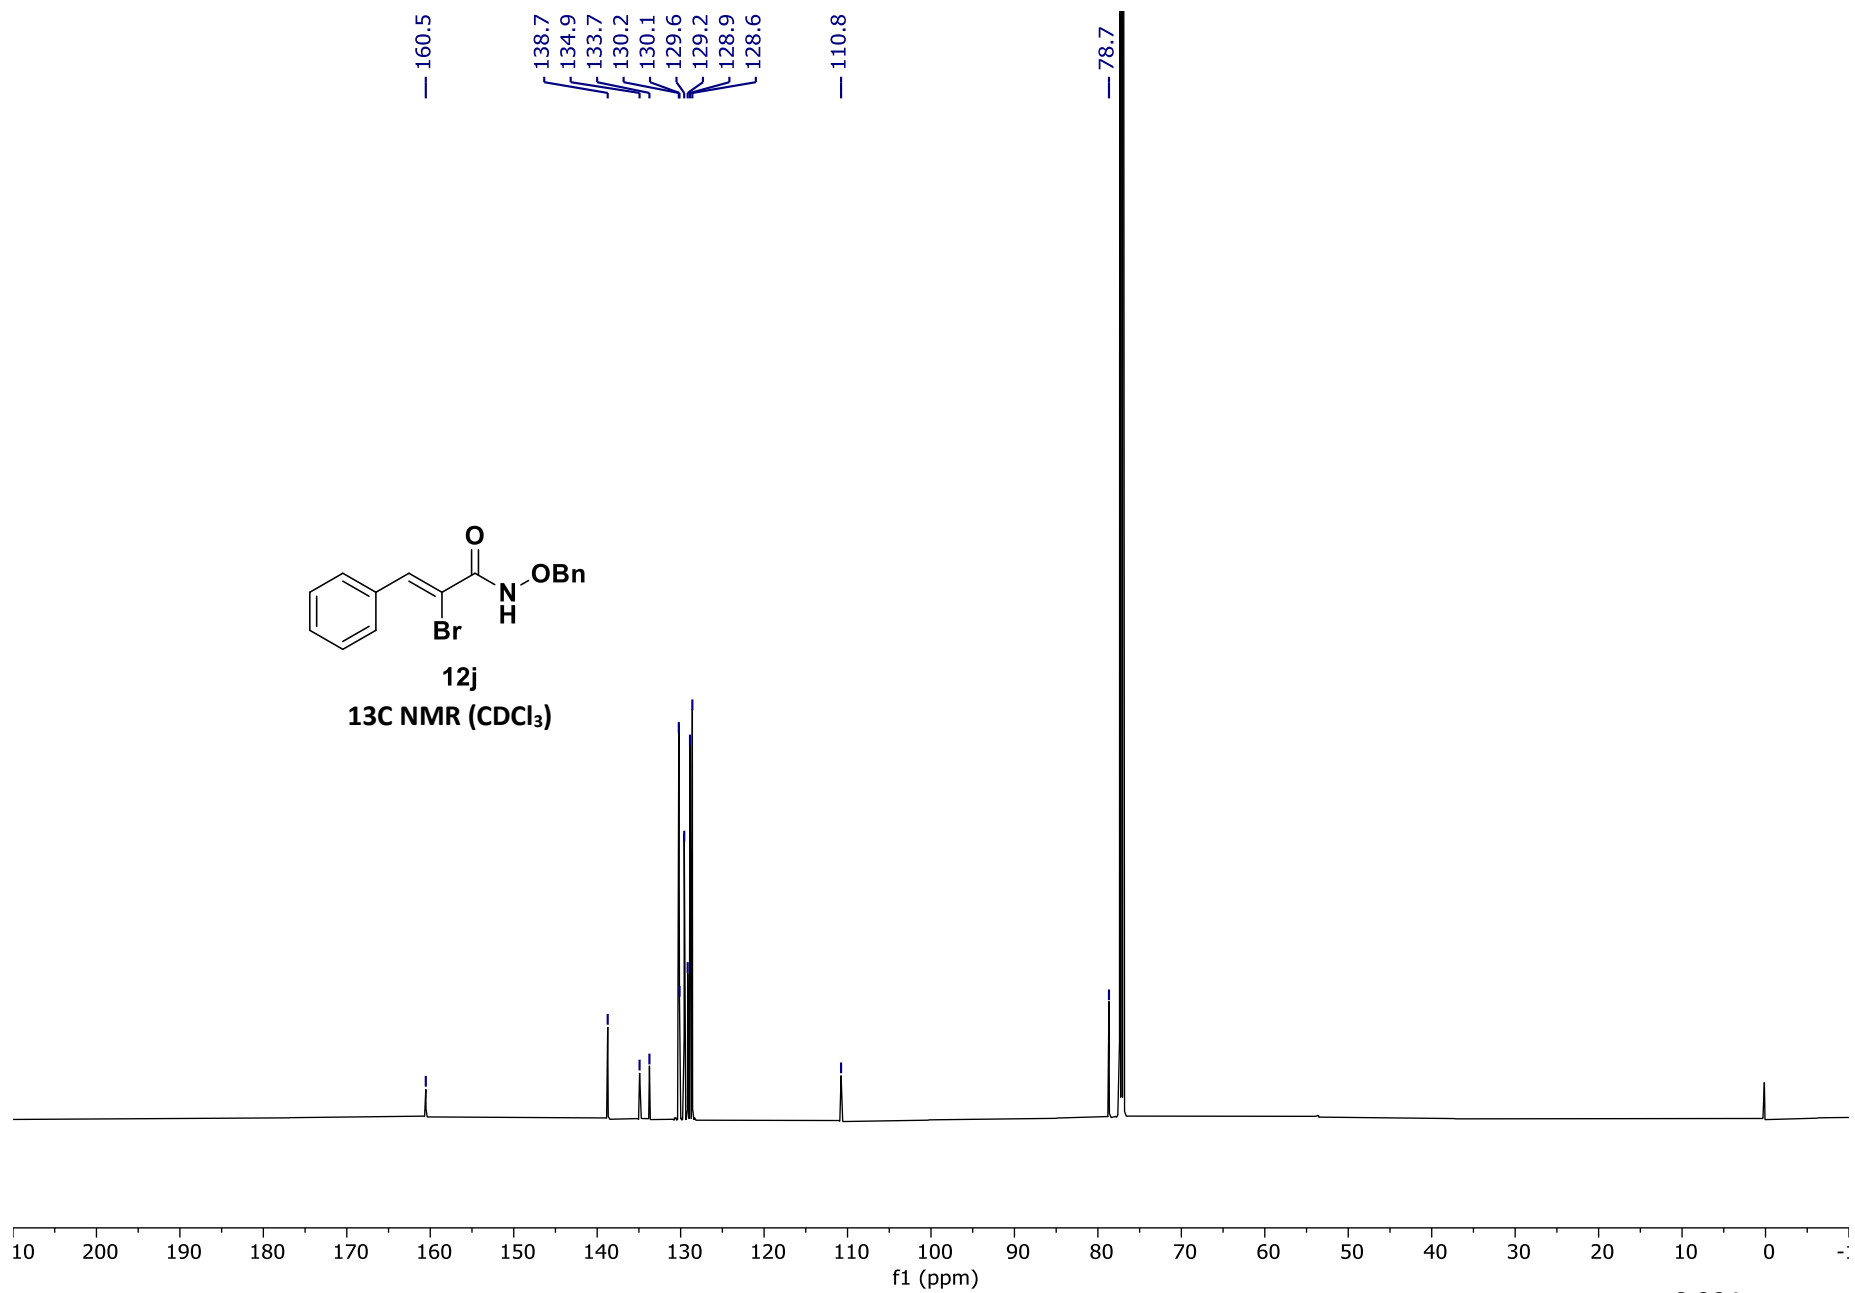

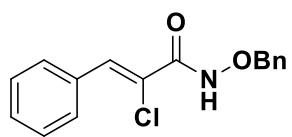

12k

<sup>1</sup>H NMR (CDCl<sub>3</sub>)

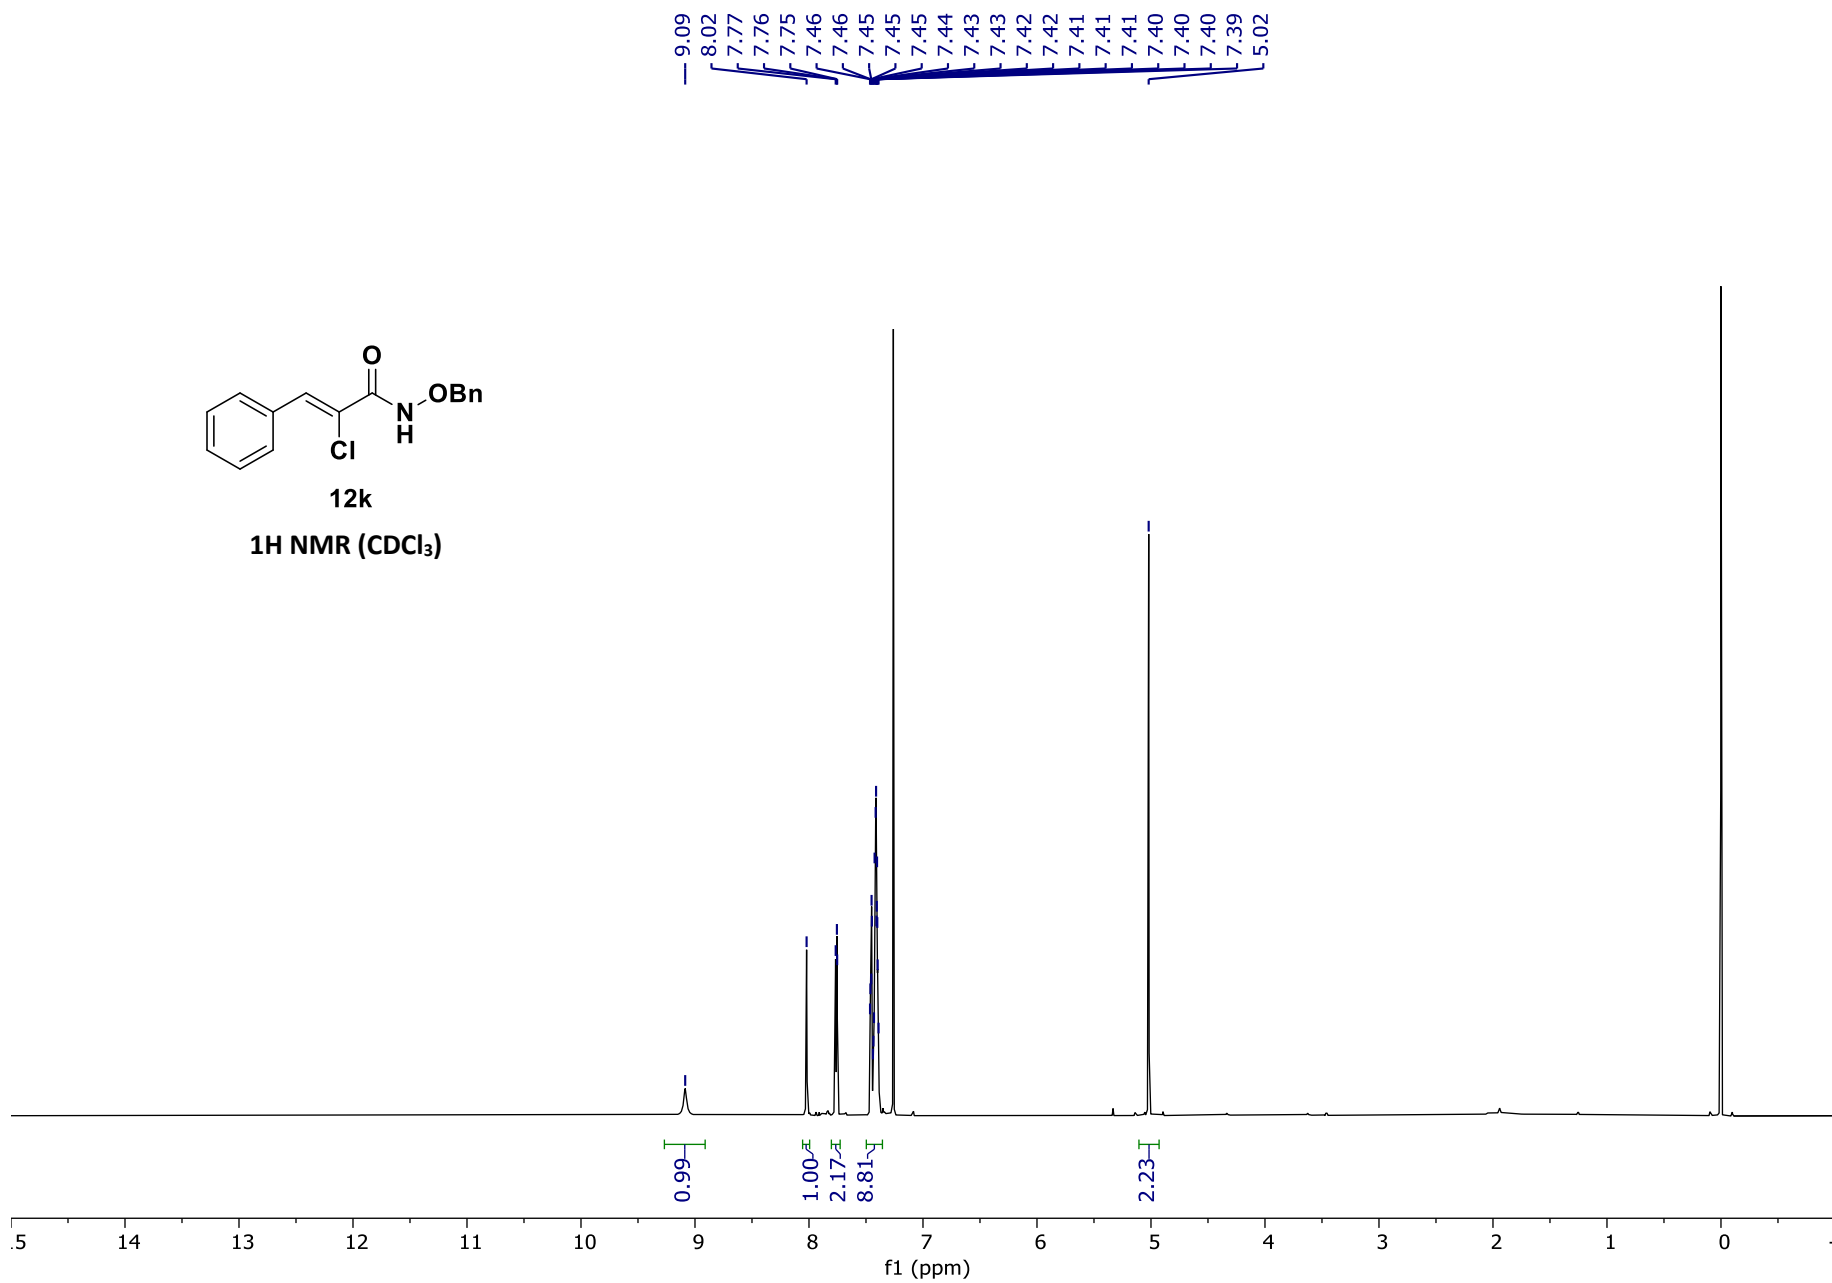

S-305

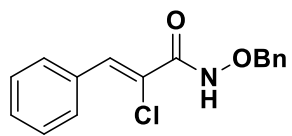

12k  
13C NMR (CDCl<sub>3</sub>)

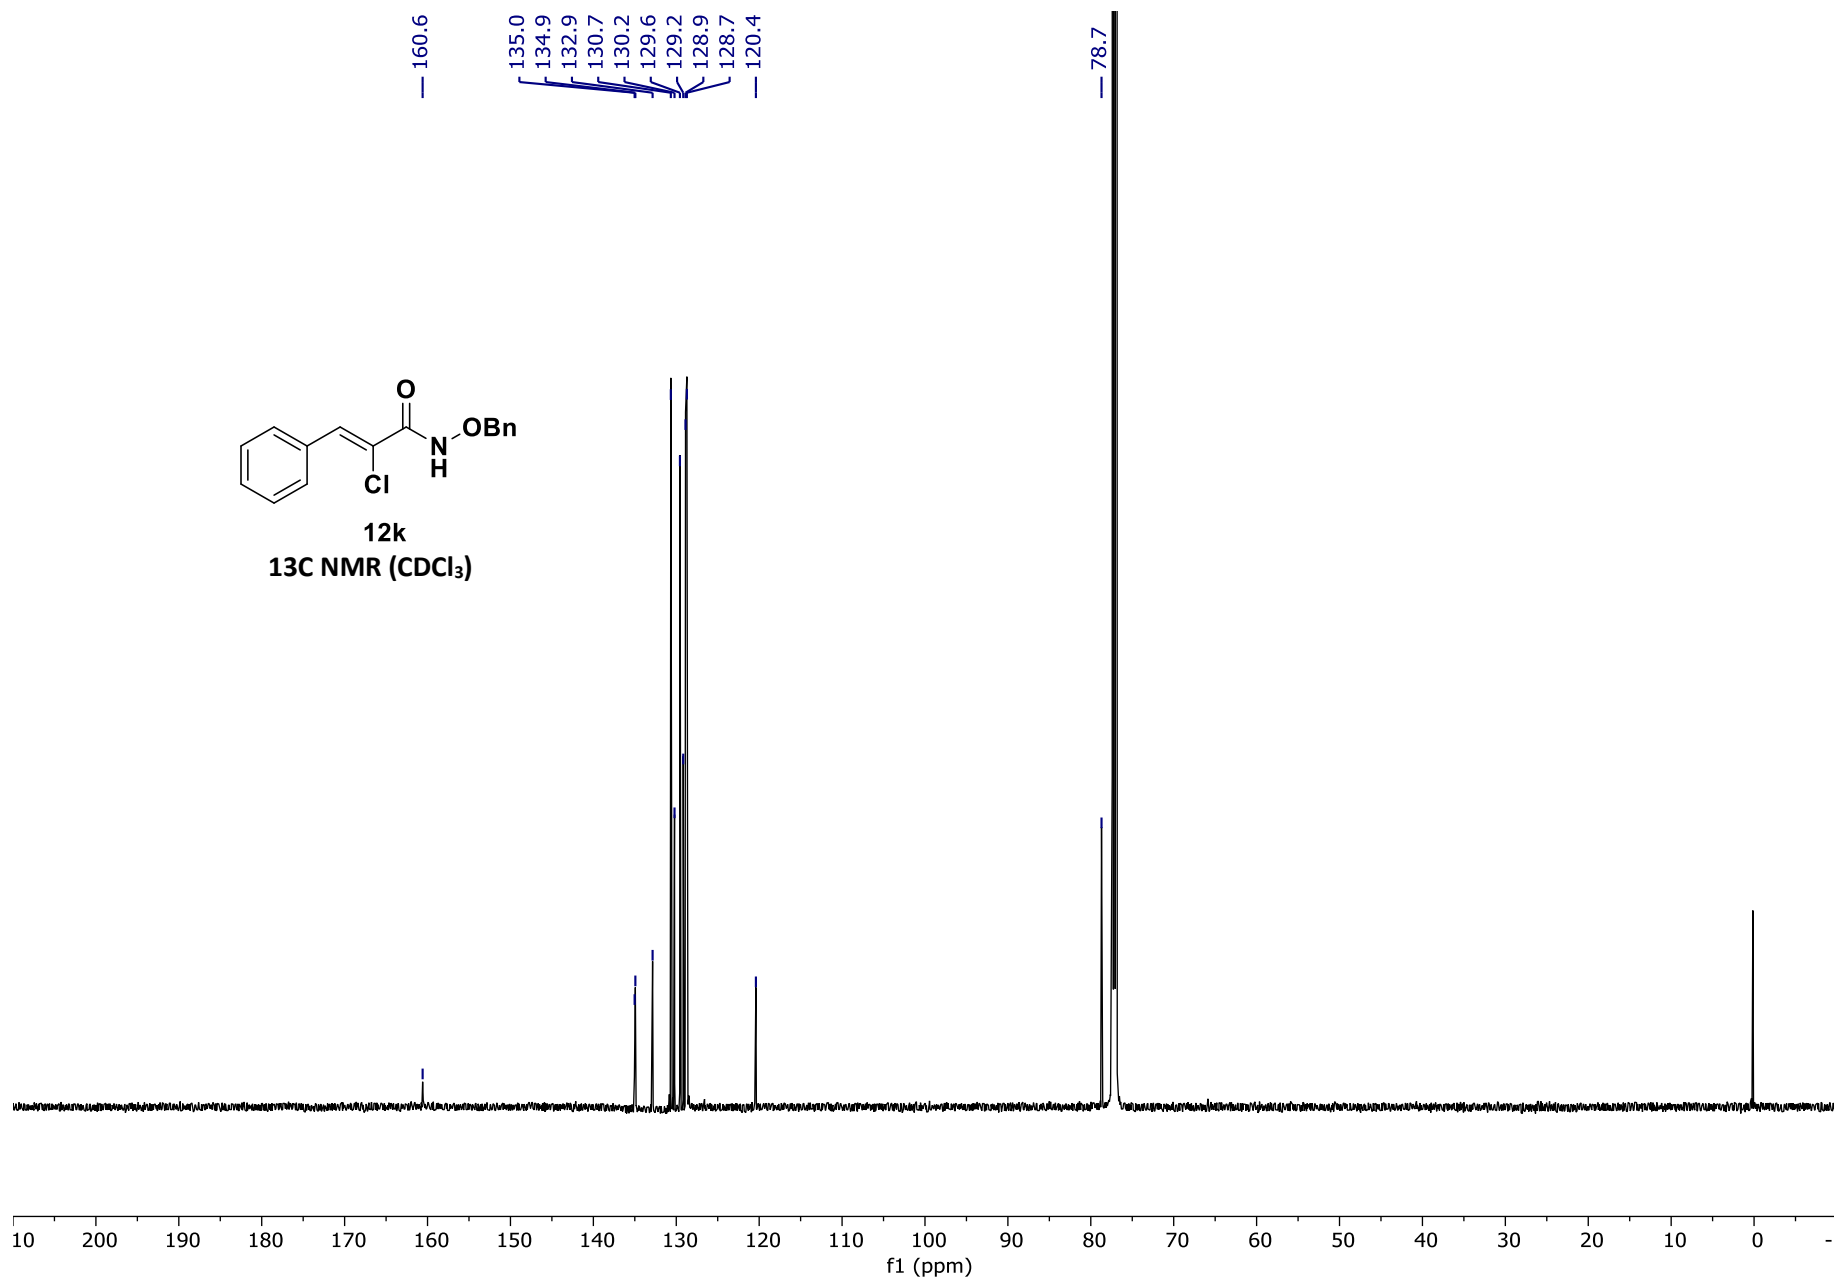

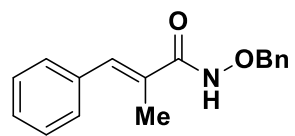

121

<sup>1</sup>H NMR (CDCl<sub>3</sub>)

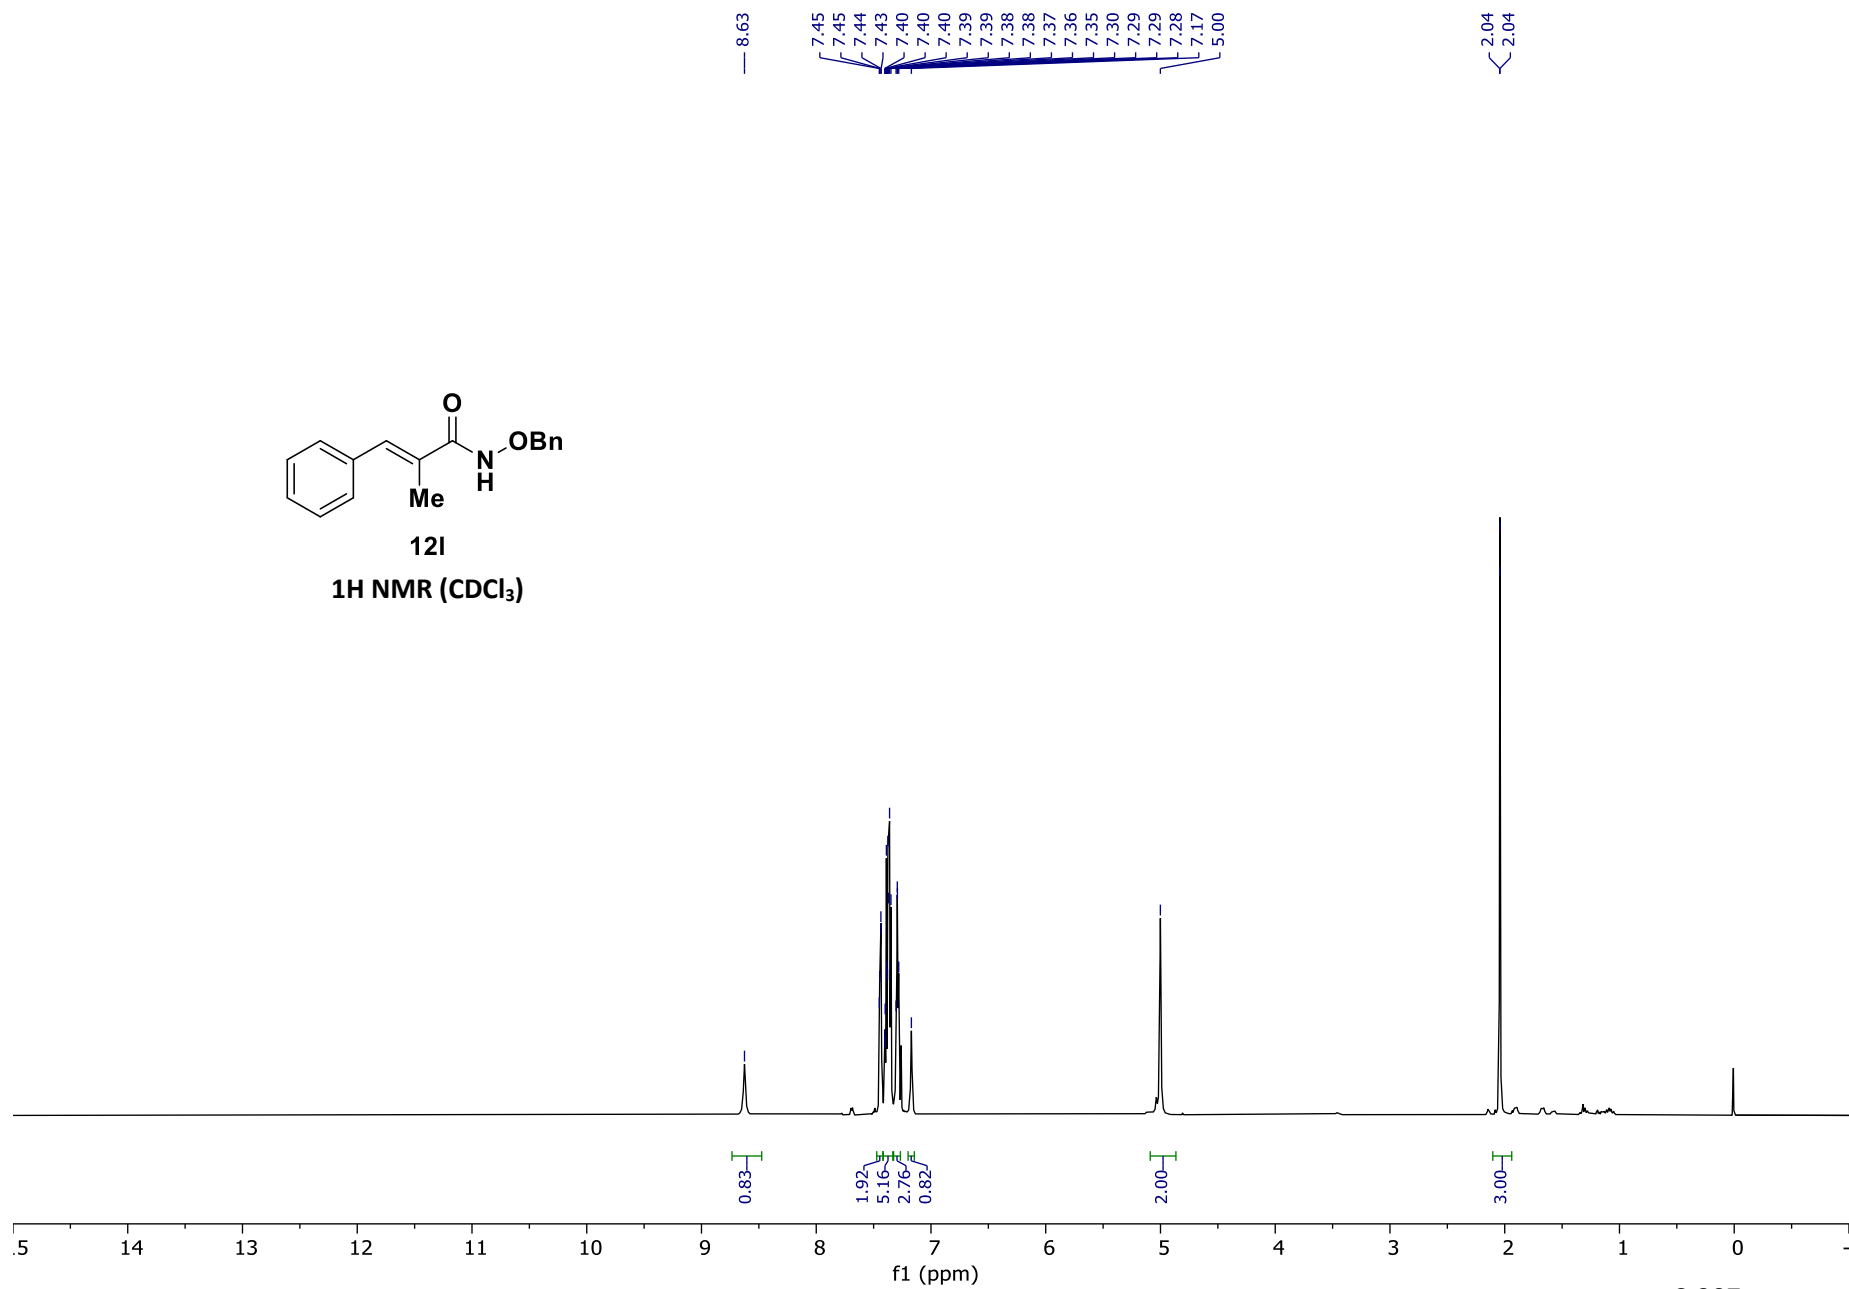

S-307

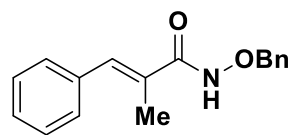

12l

<sup>13</sup>C NMR (CDCl<sub>3</sub>)

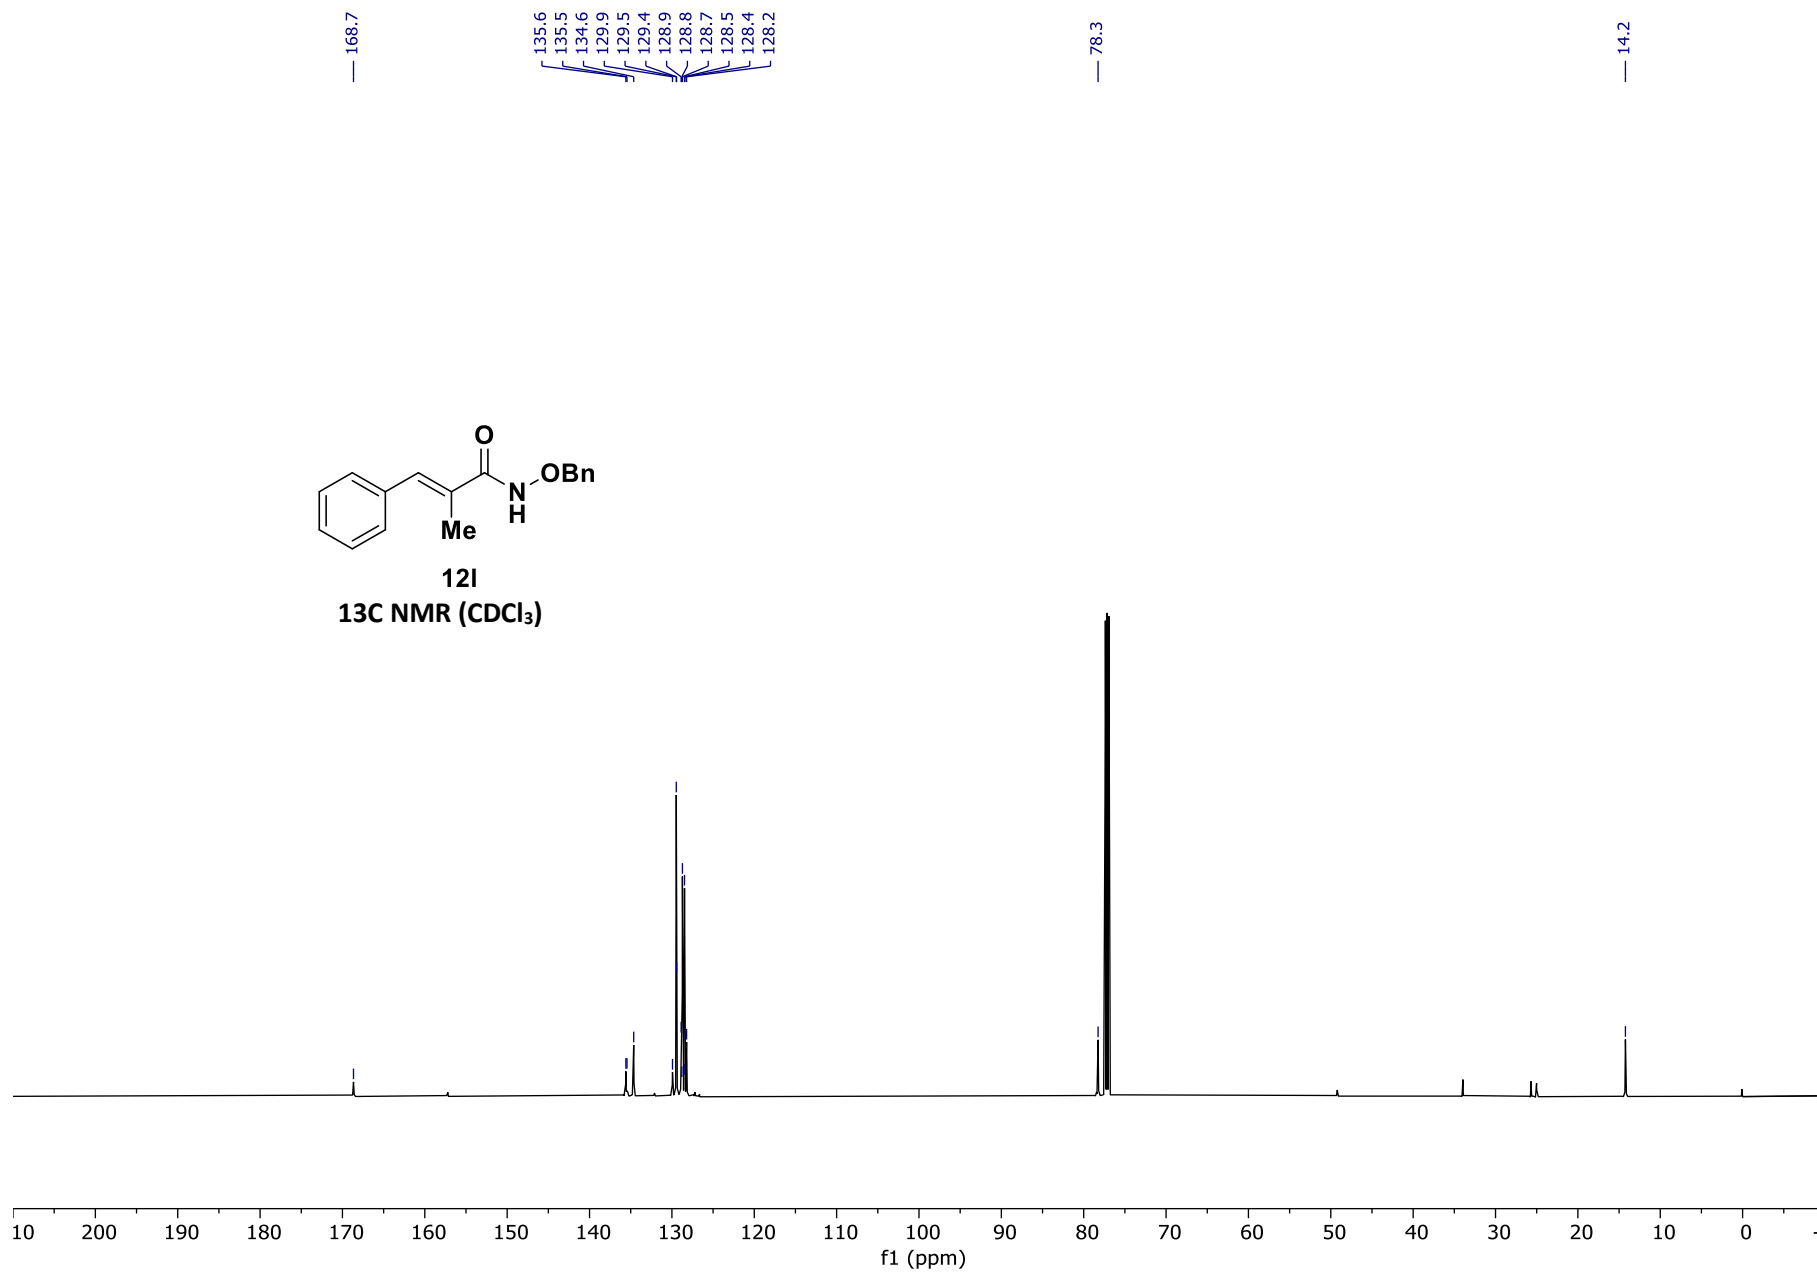



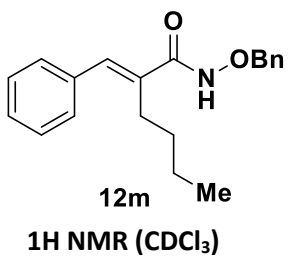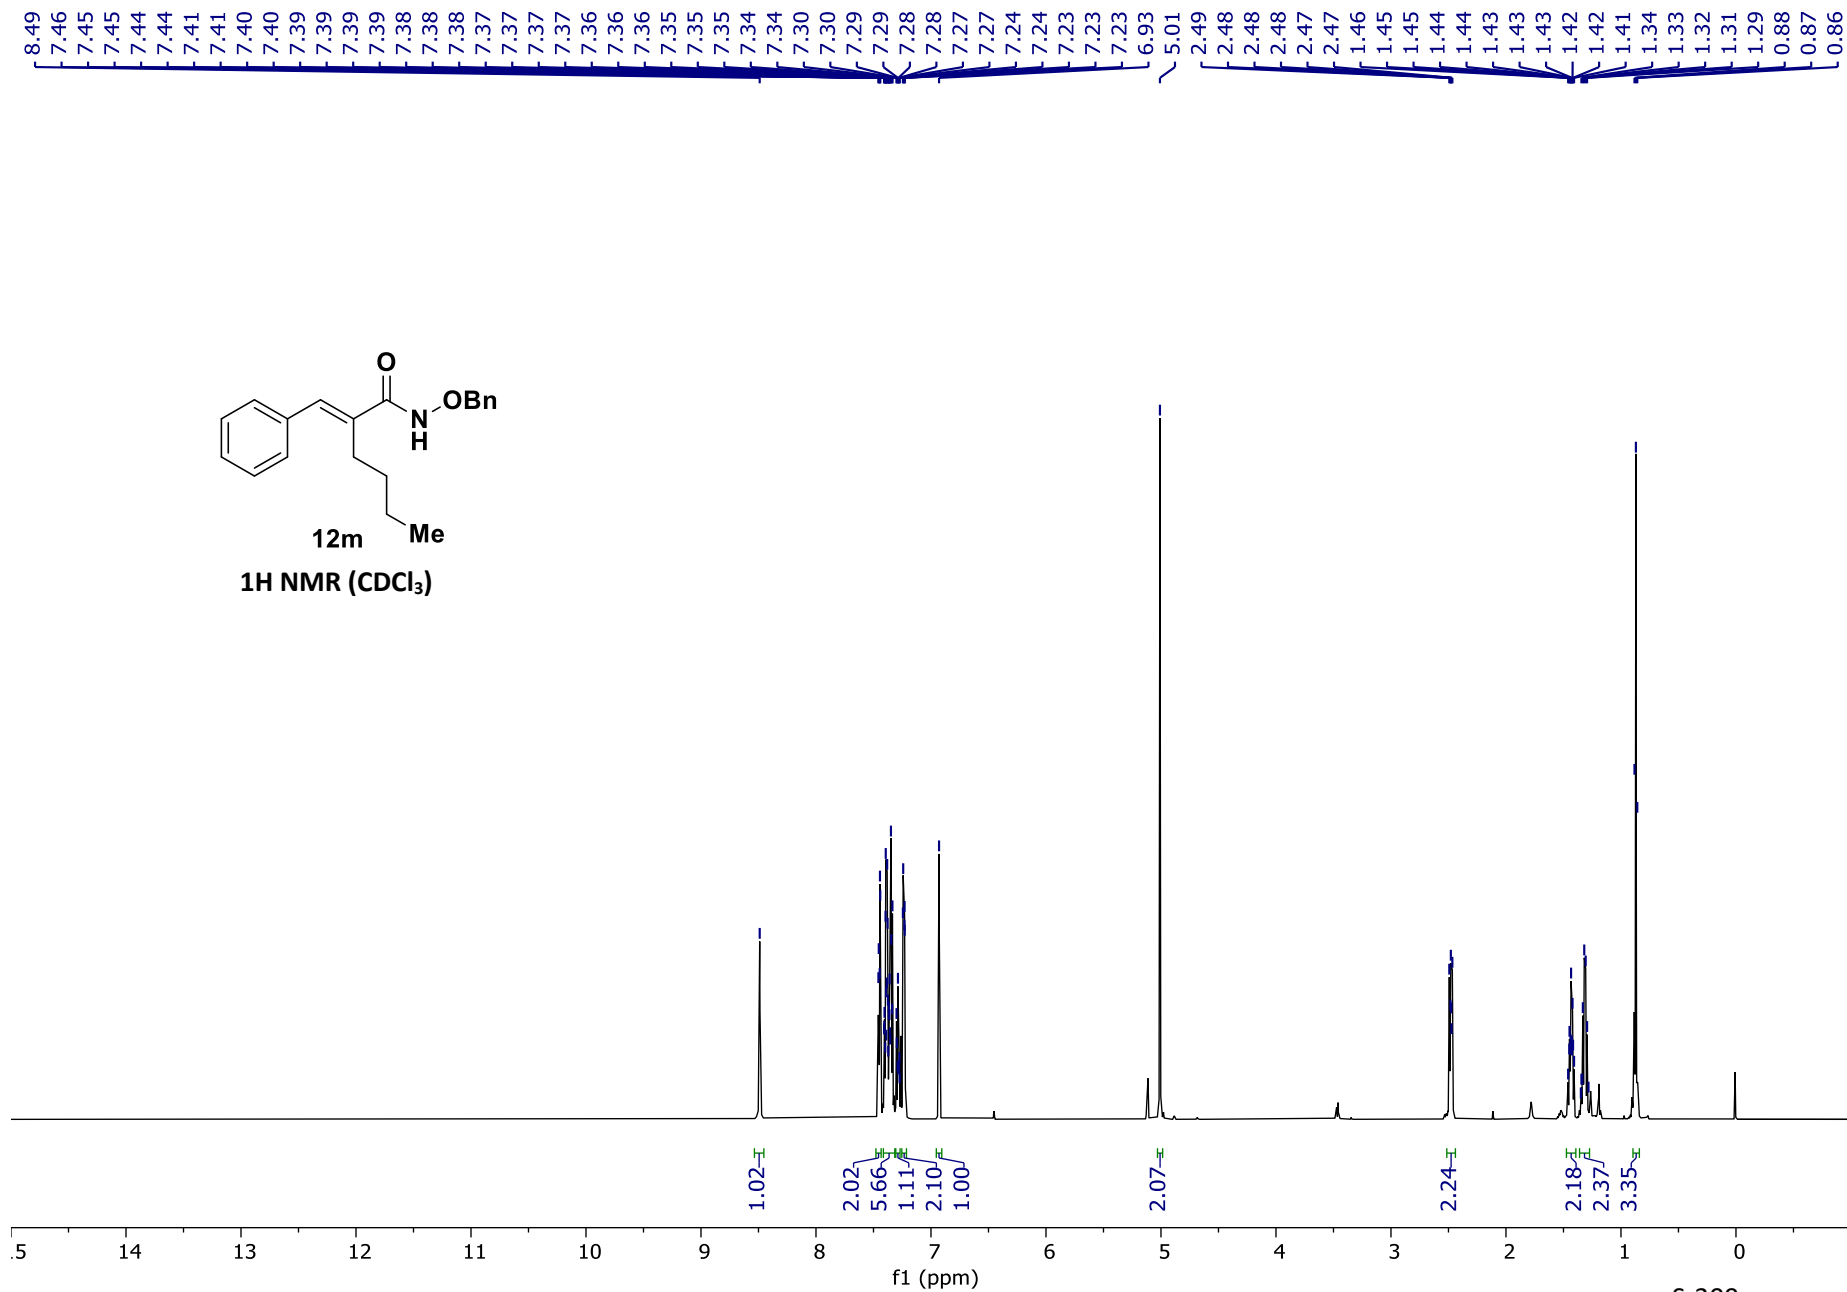

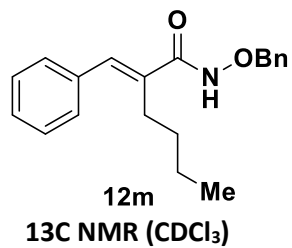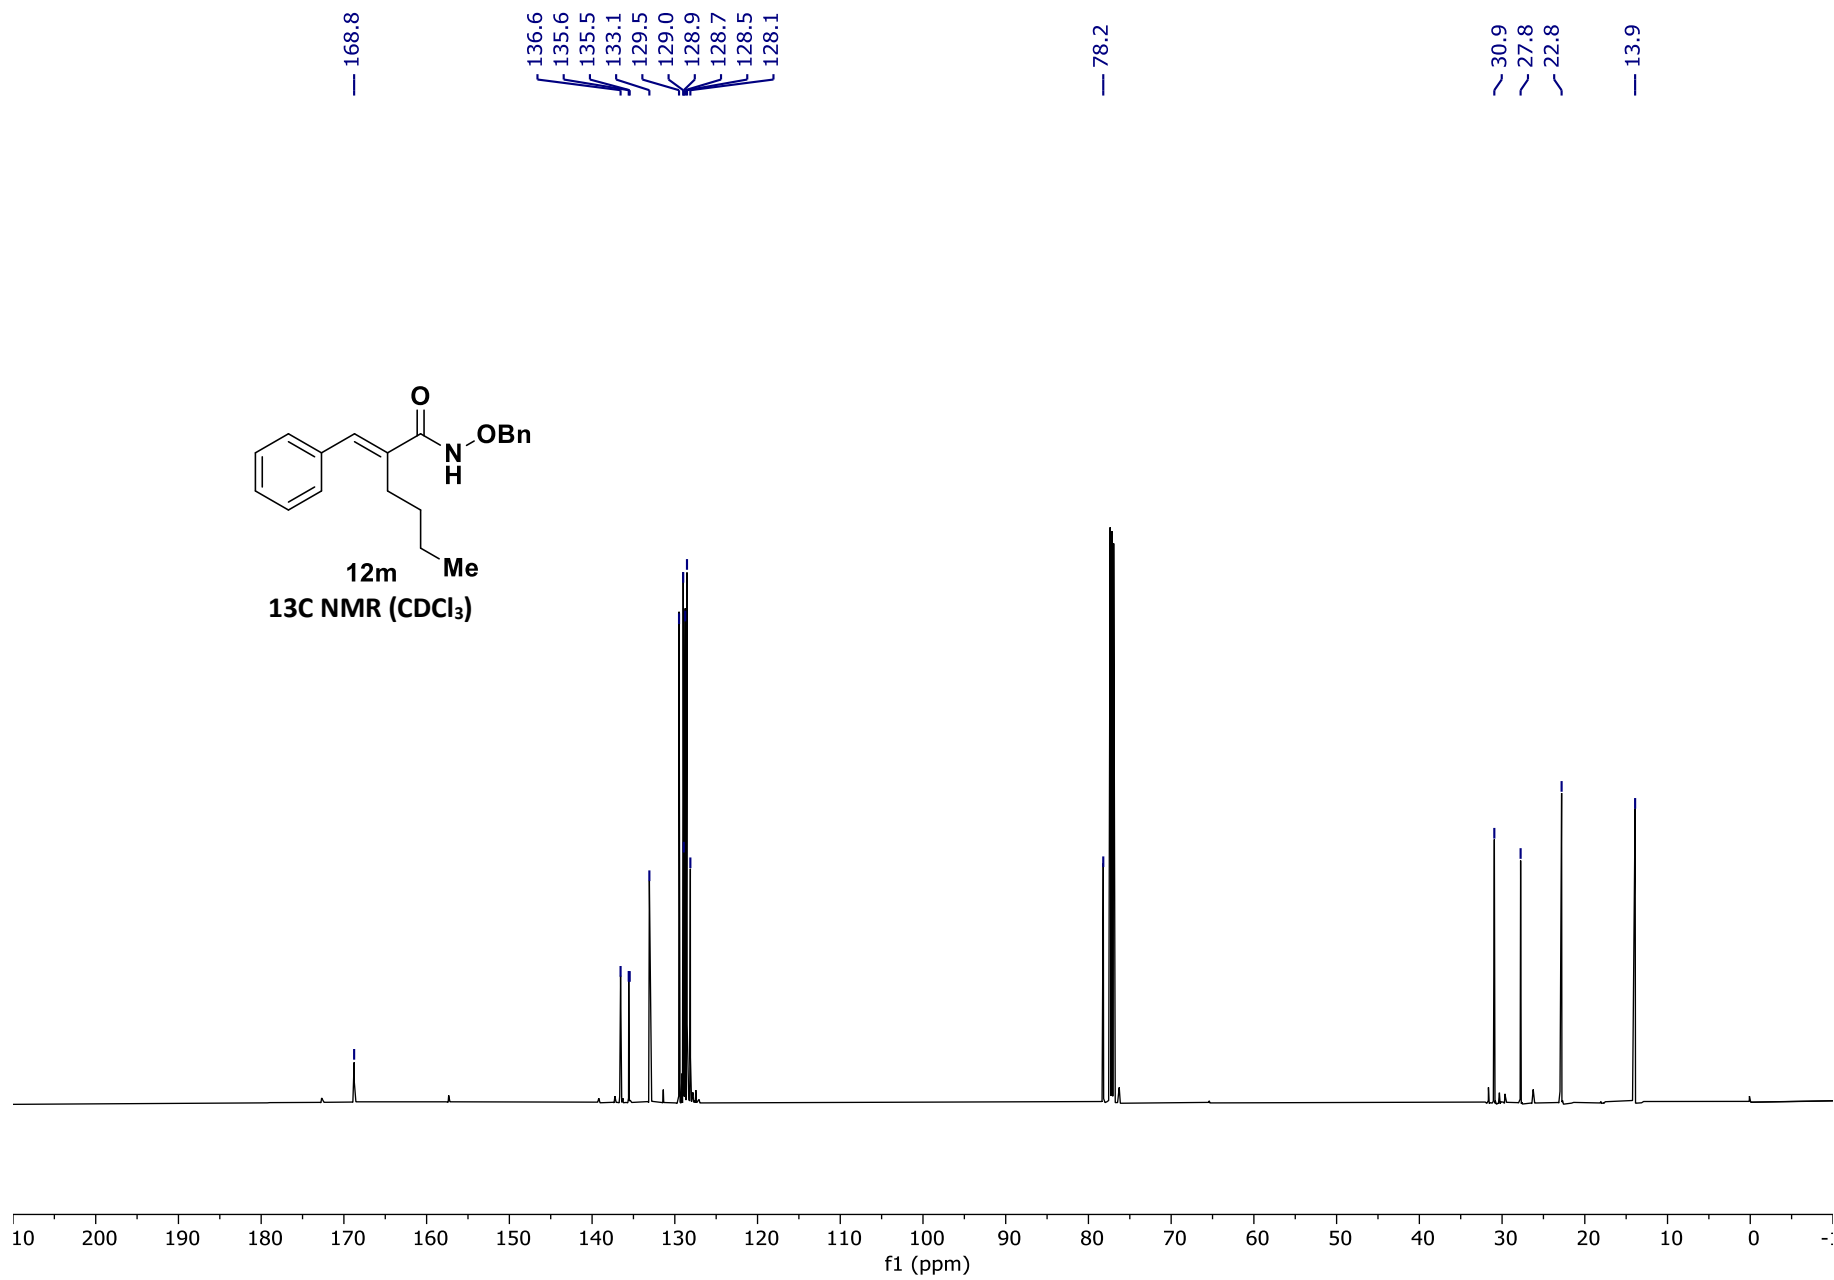

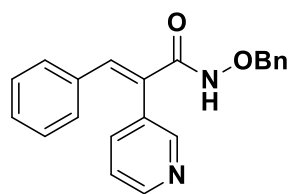

12n  
1H NMR (CDCl<sub>3</sub>)

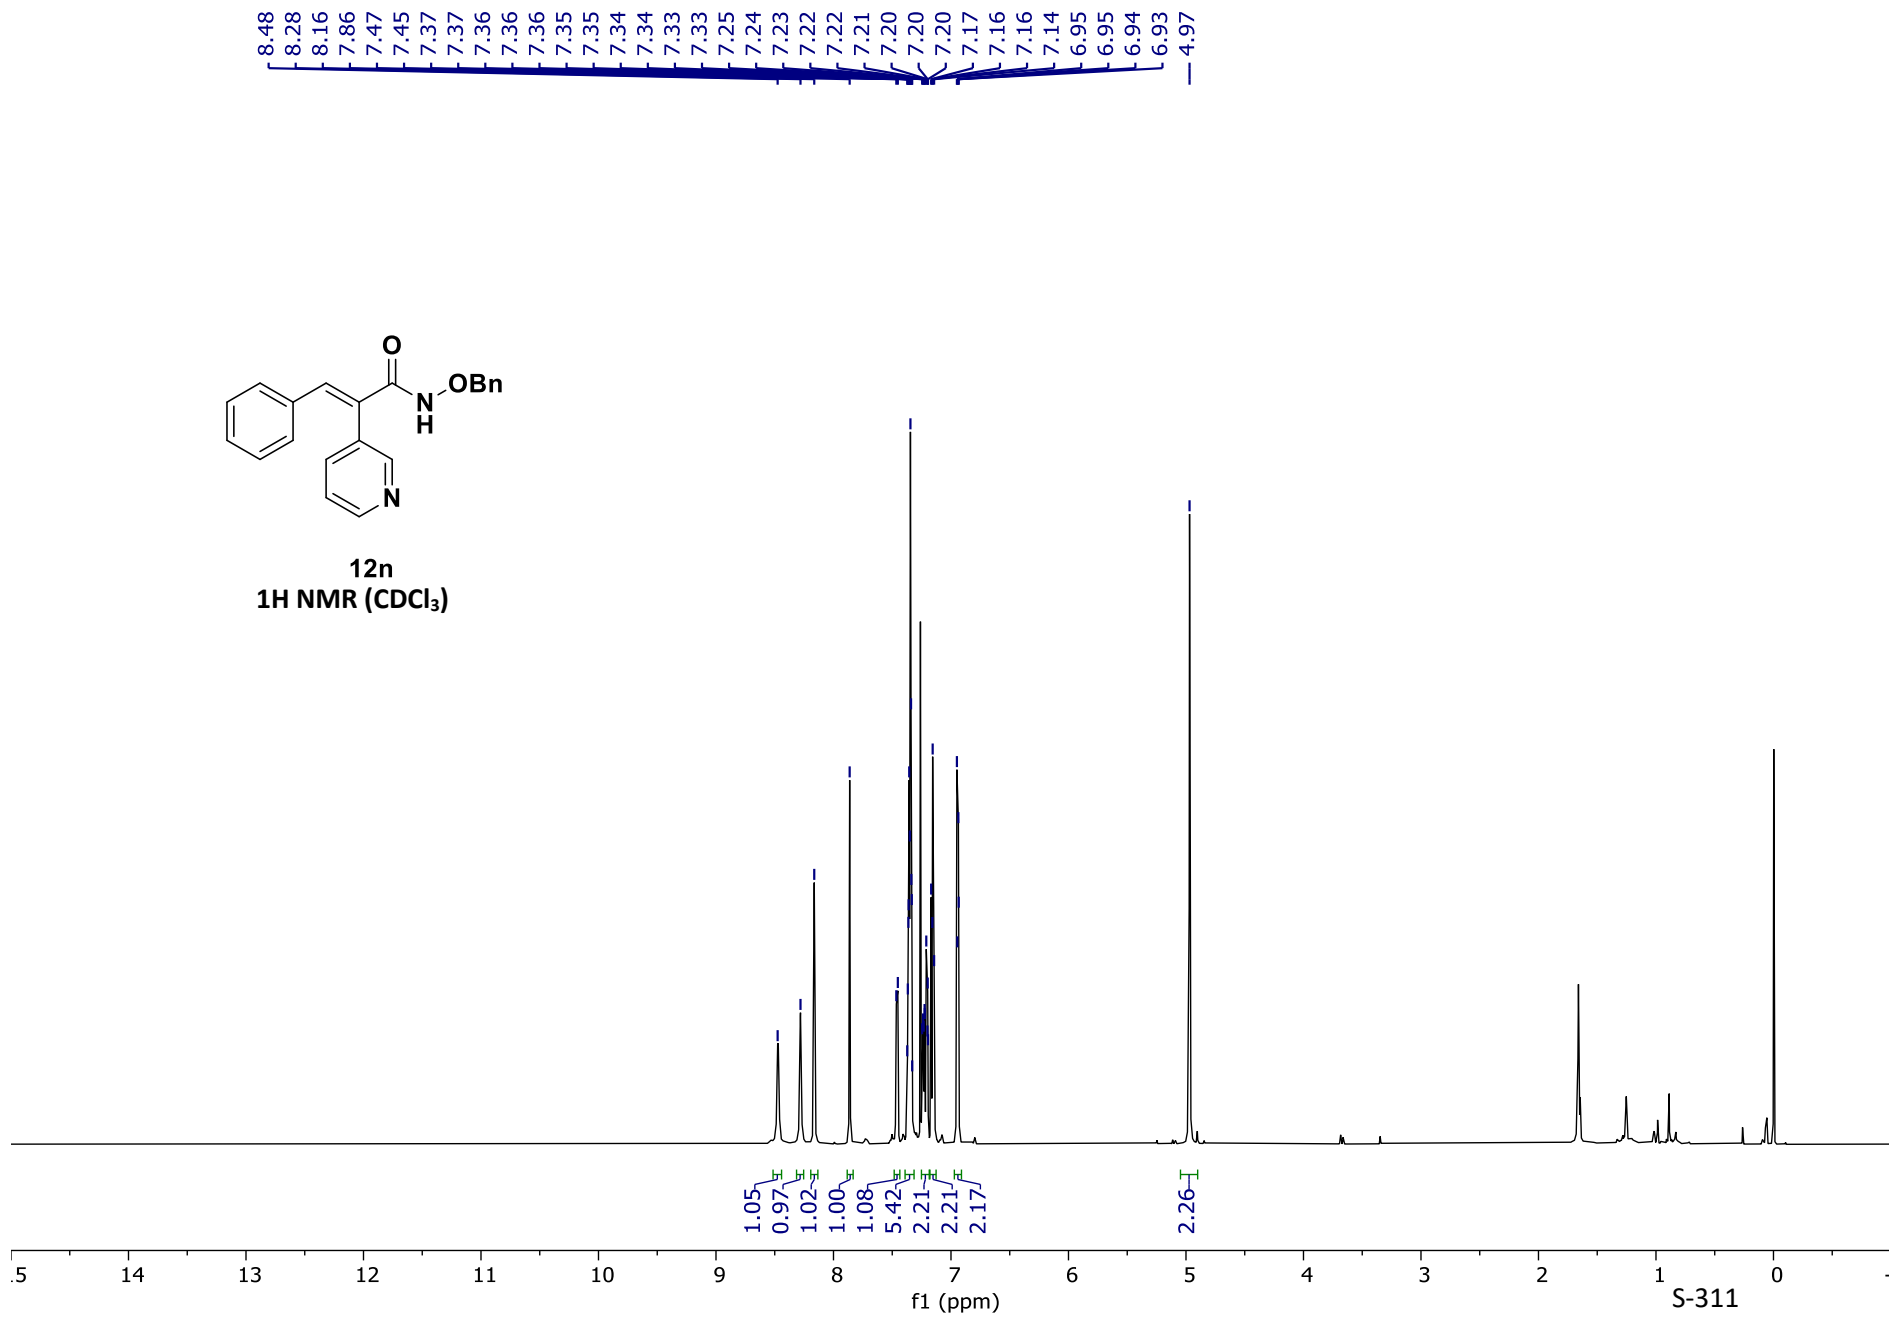

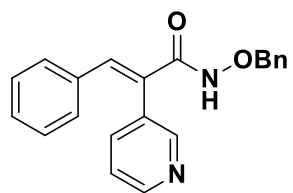

12n  
13C NMR (CDCl<sub>3</sub>)

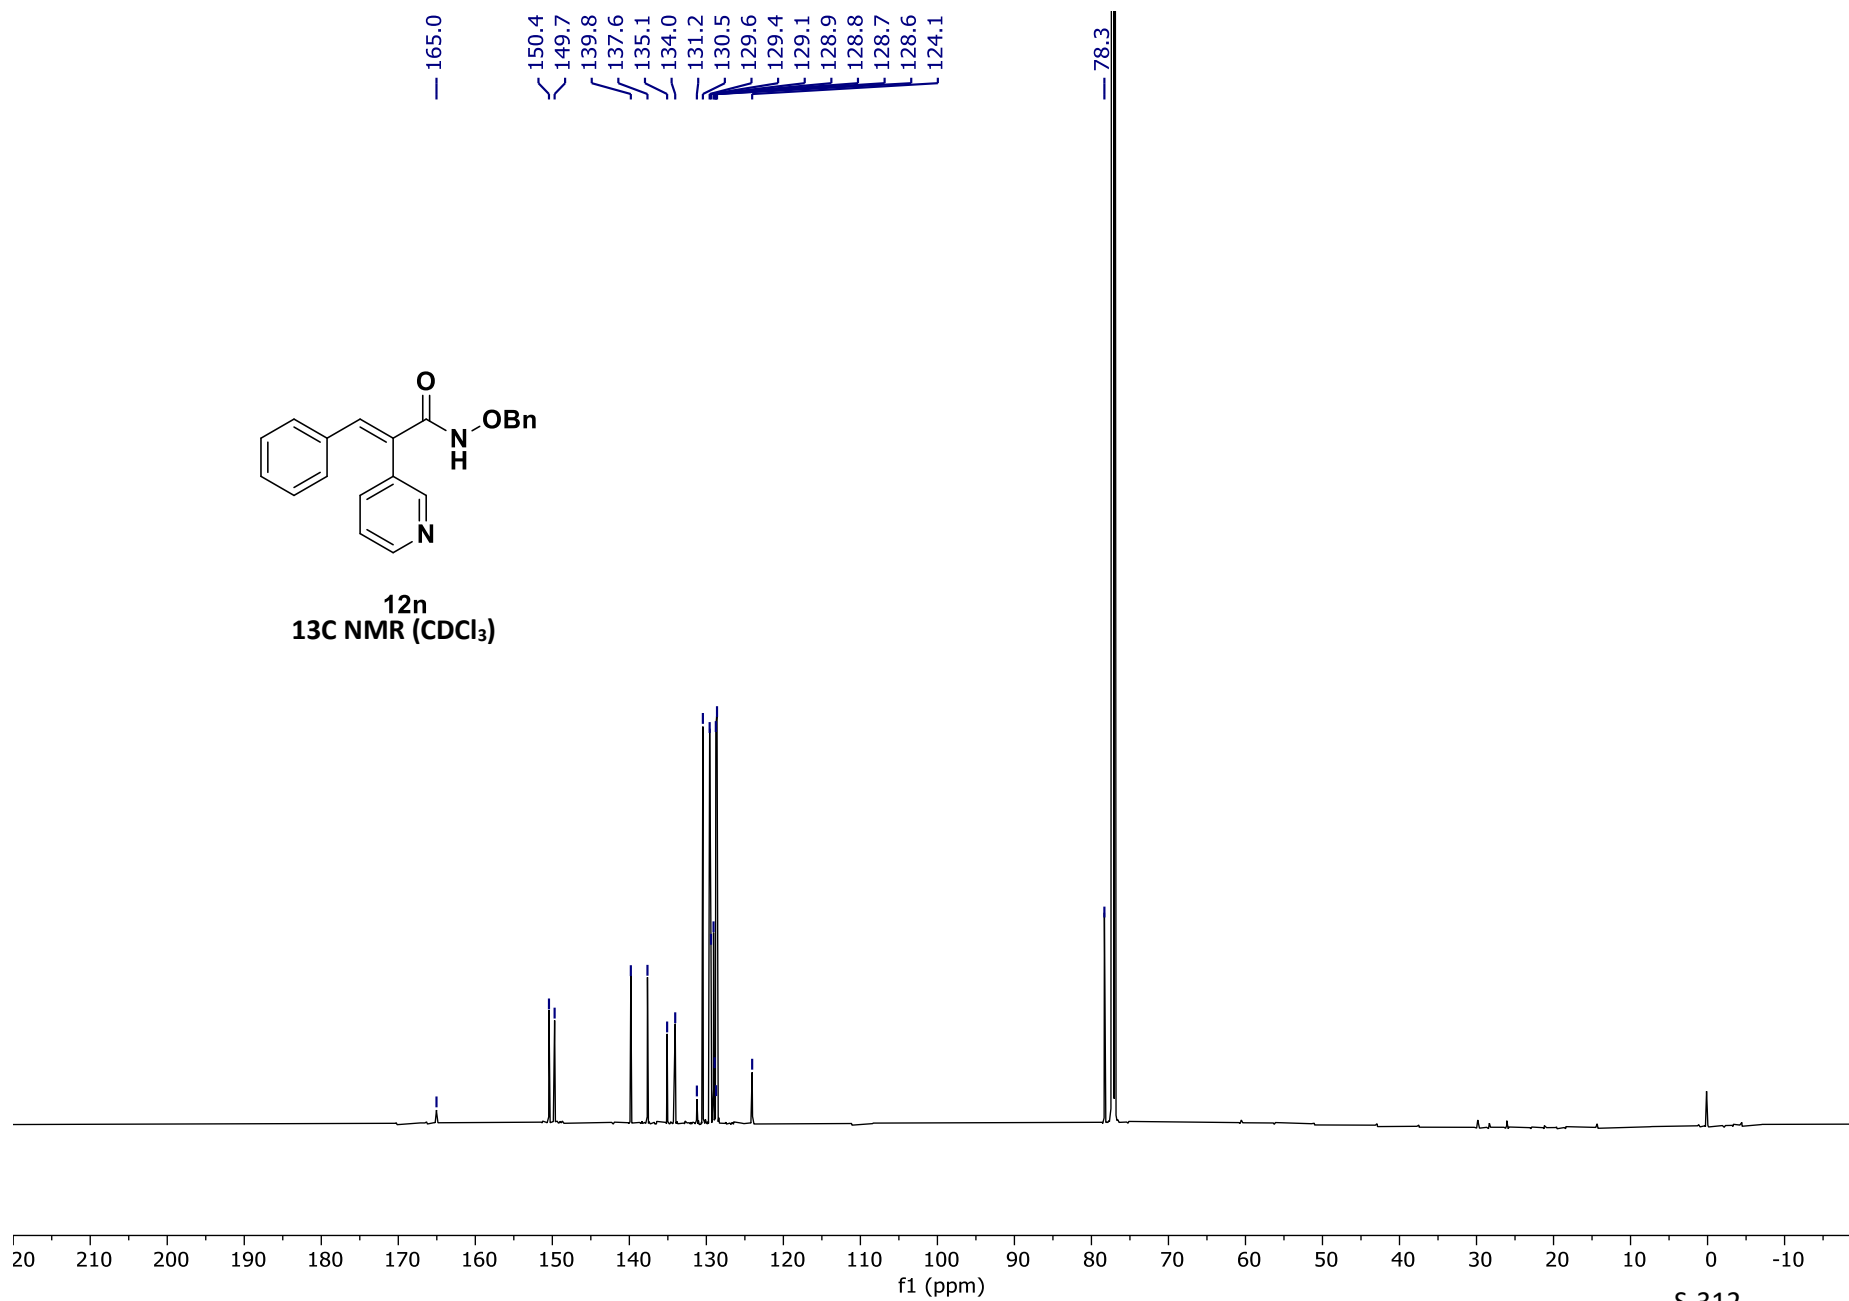

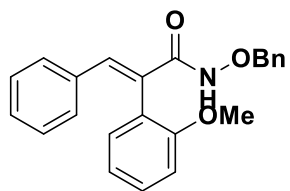

12o

<sup>1</sup>H NMR (CDCl<sub>3</sub>)

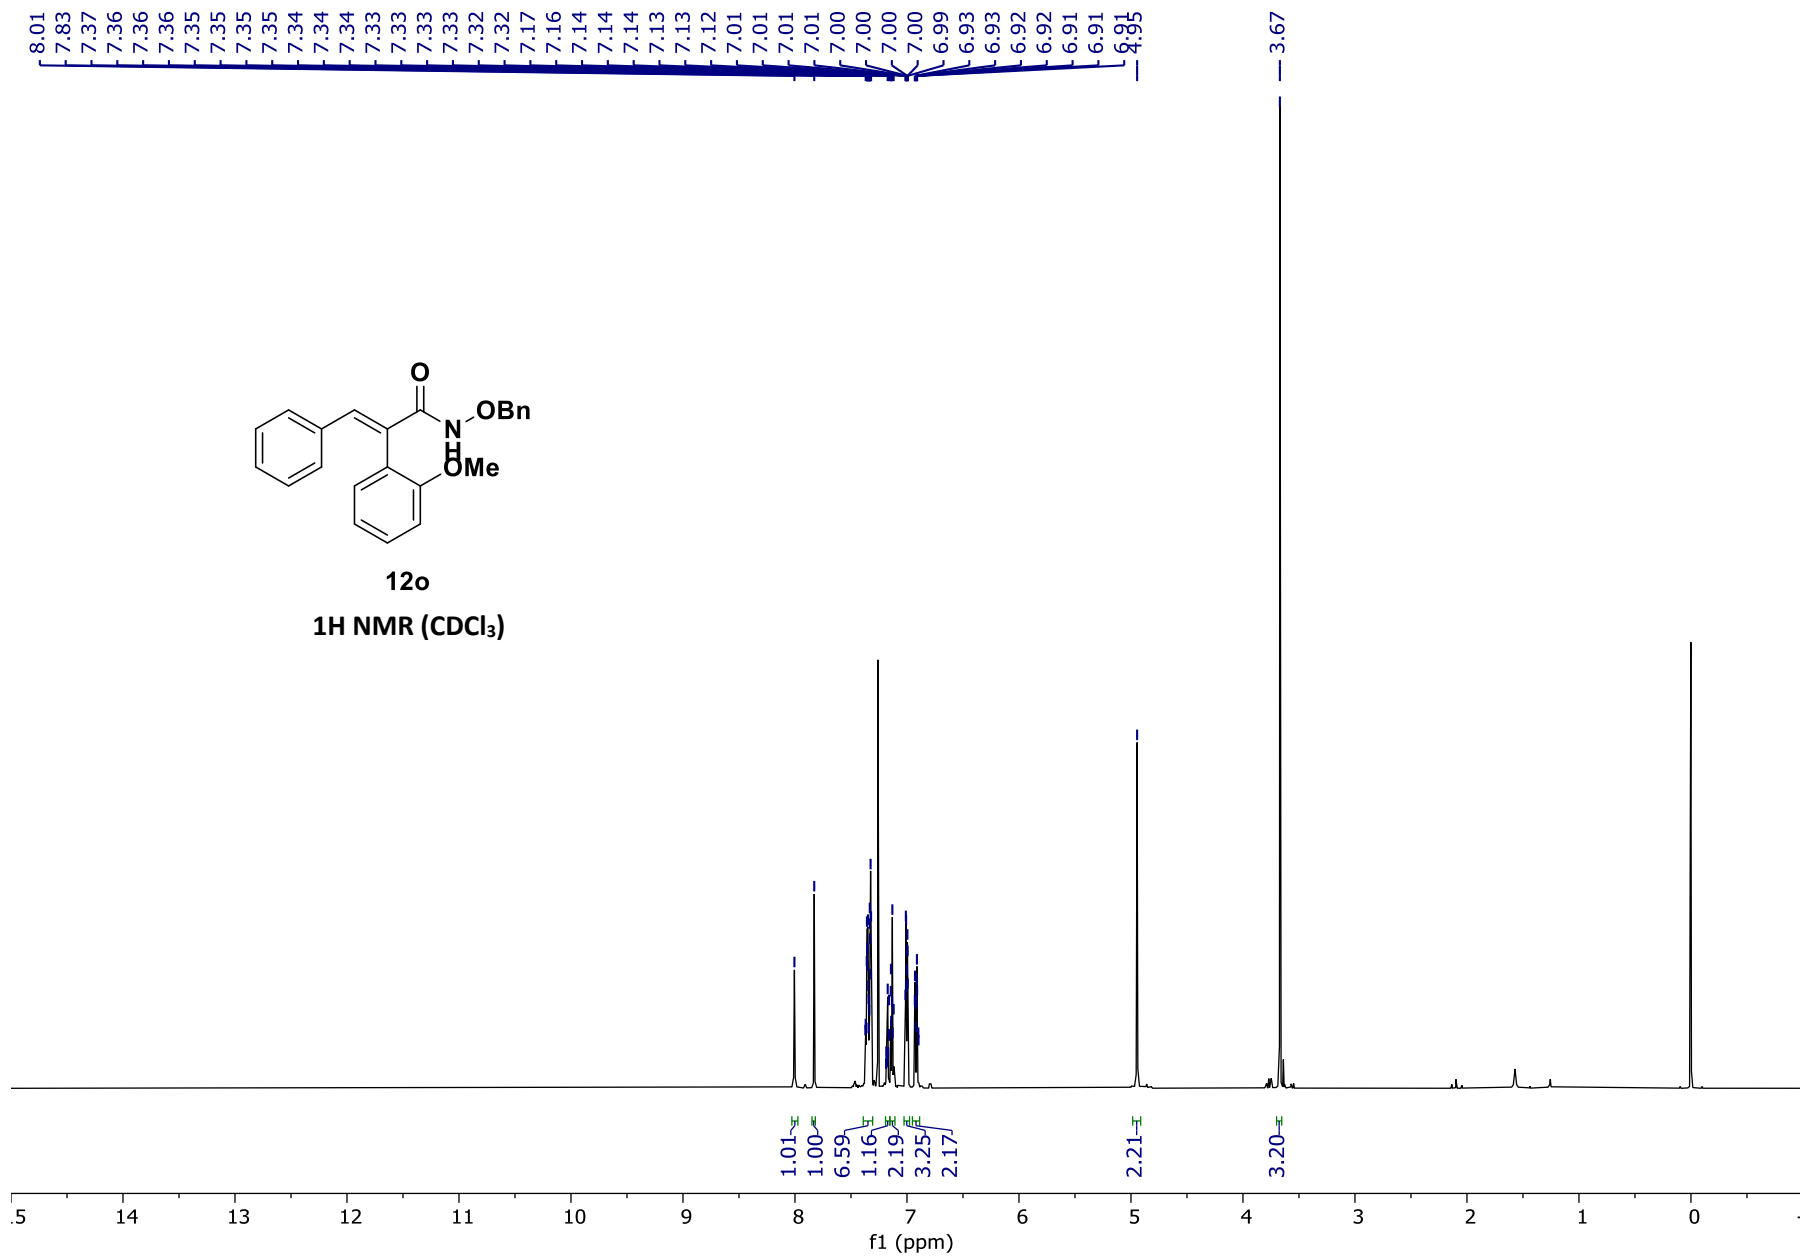

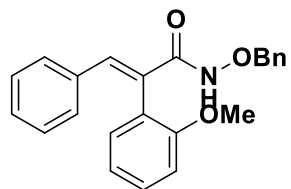

12o

$^{13}\text{C}$  NMR ( $\text{CDCl}_3$ )

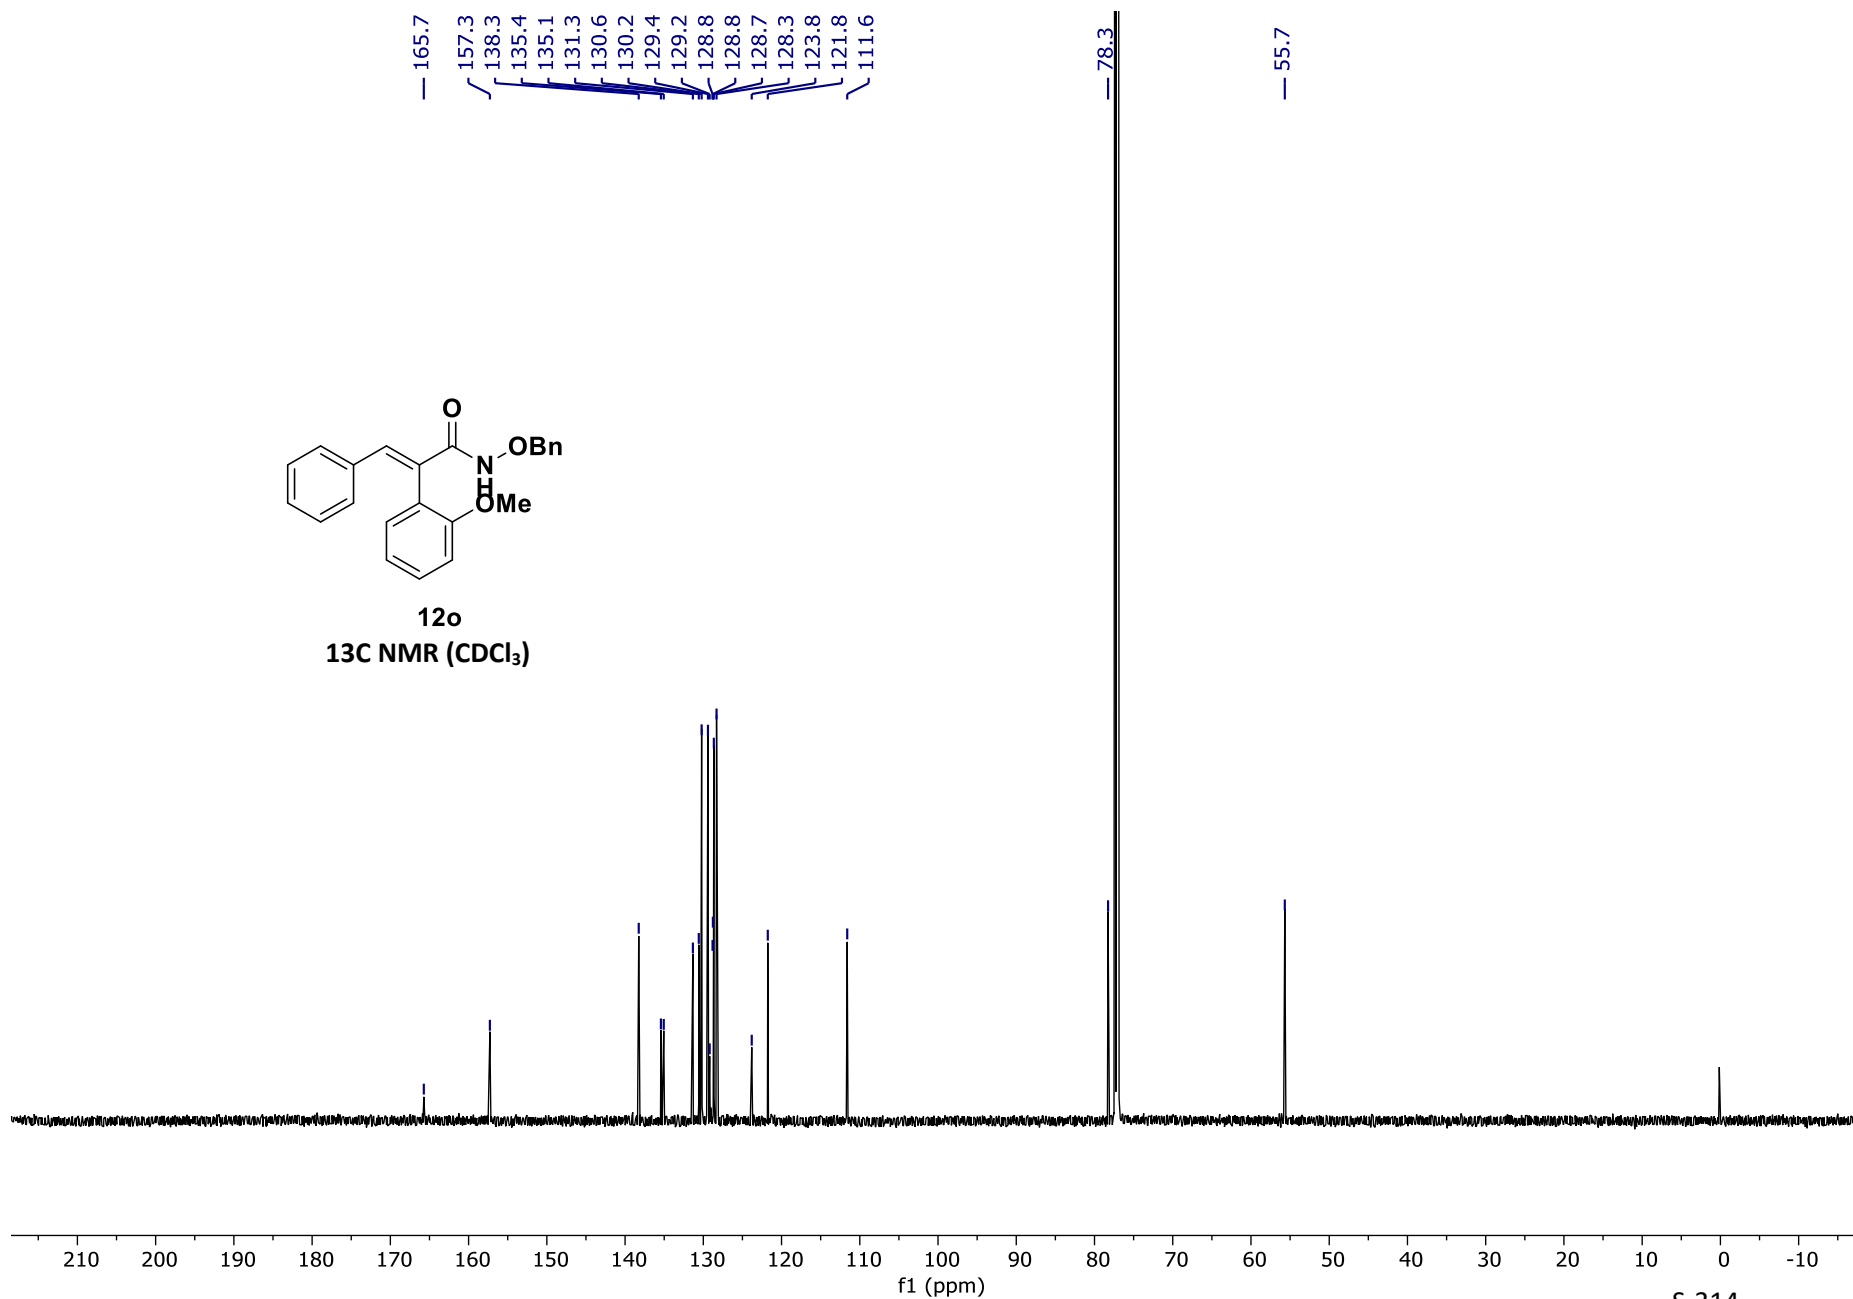

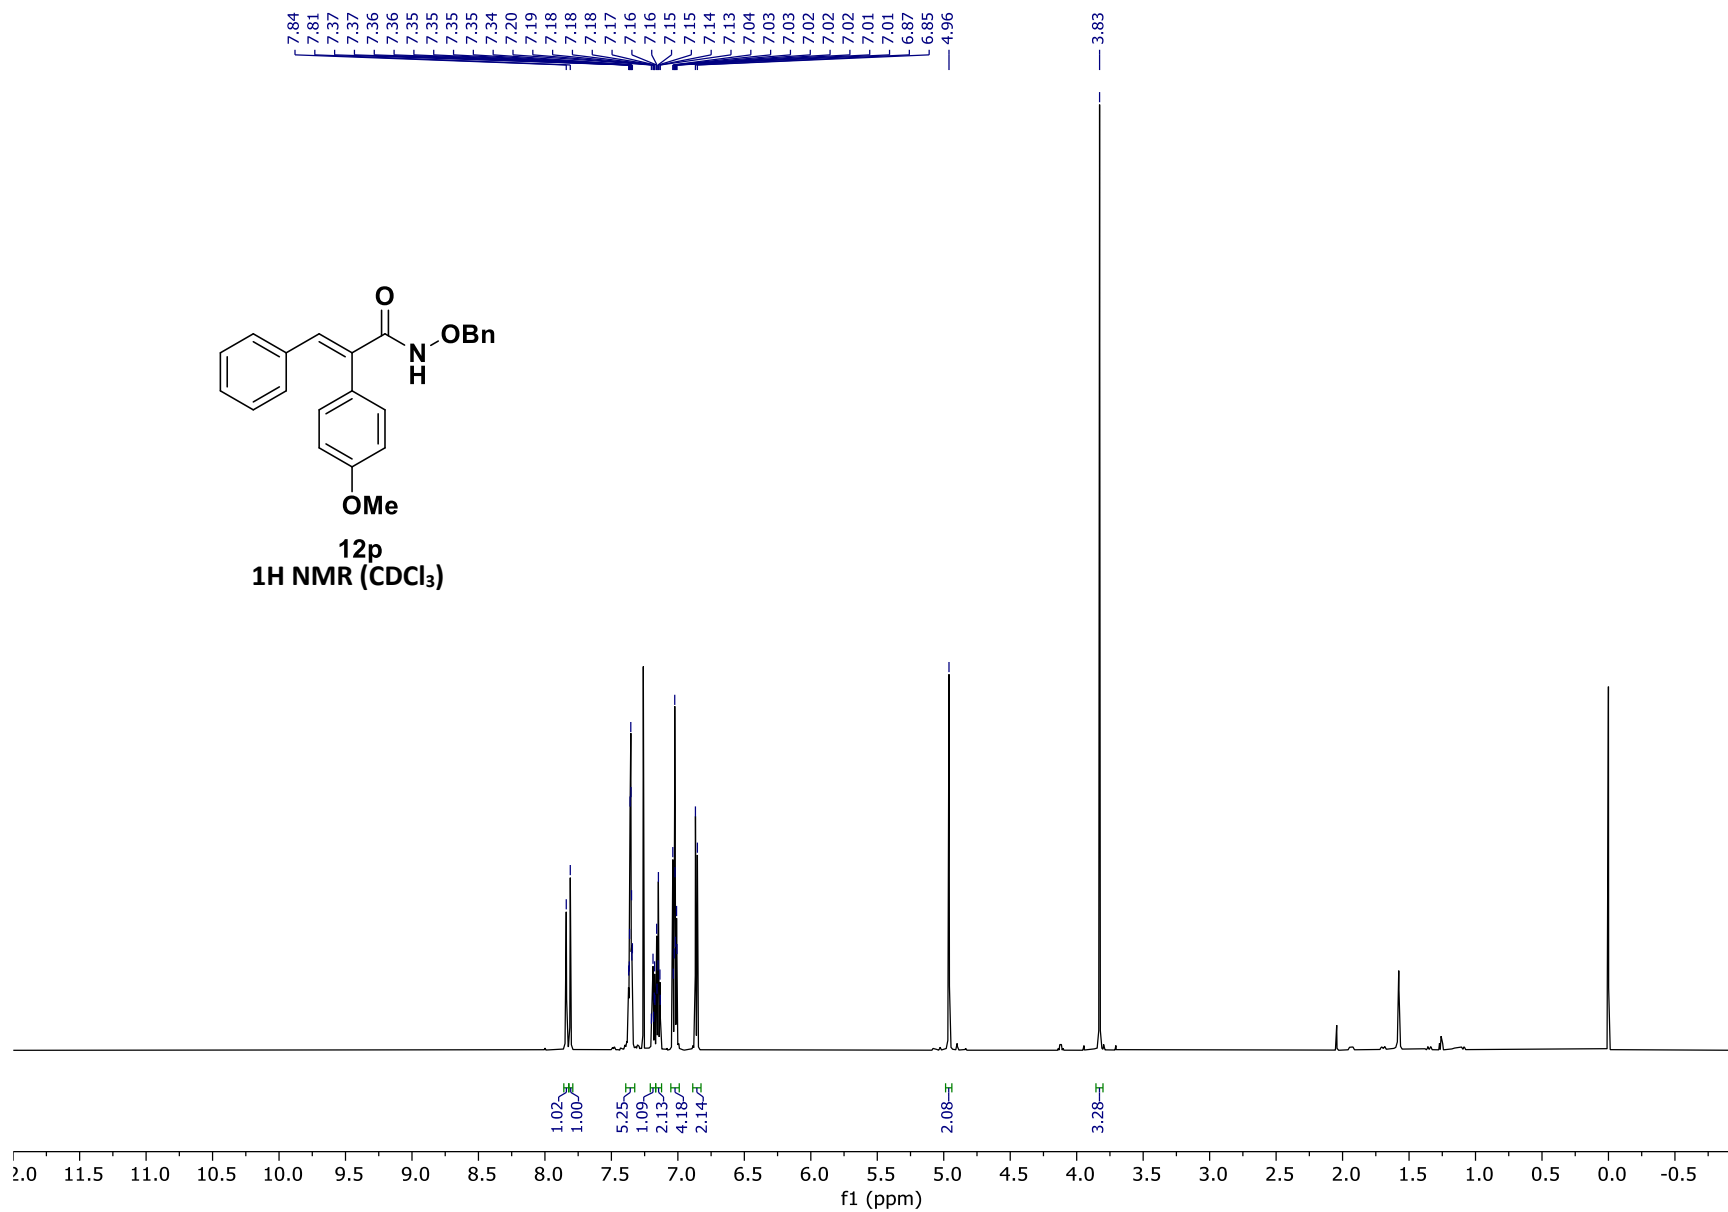

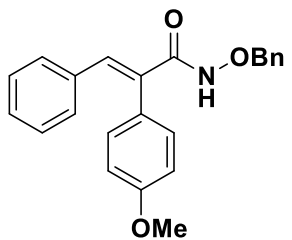

12p

<sup>13</sup>C NMR (CDCl<sub>3</sub>)

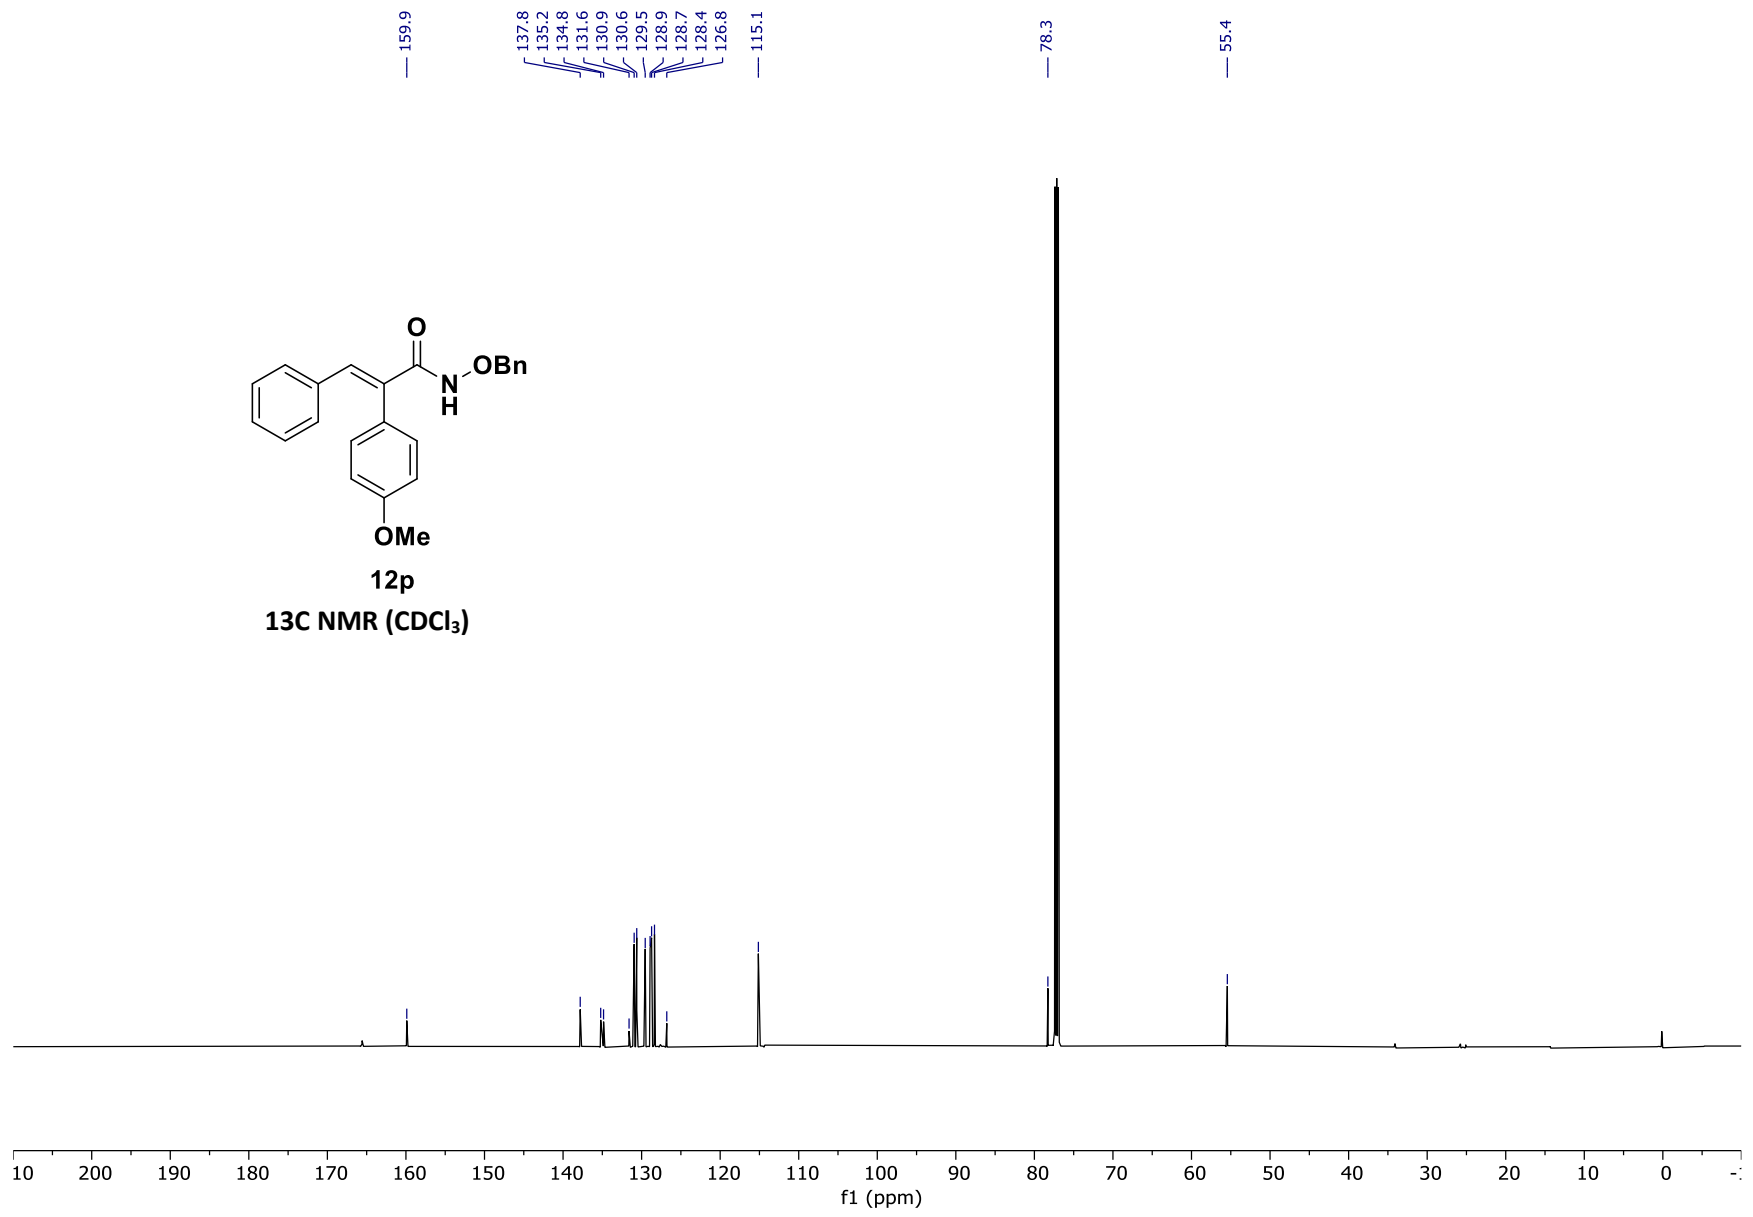



7.85  
7.79  
7.37  
7.36  
7.36  
7.36  
7.35  
7.35  
7.35  
7.35  
7.34  
7.34  
7.34  
7.34  
7.34  
7.33  
7.20  
7.18  
7.17  
7.17  
7.17  
7.14  
7.14  
7.14  
7.13  
7.13  
7.13  
7.13  
7.13  
7.12  
7.12  
7.12  
6.99  
6.99  
6.99  
6.99  
6.98  
6.98  
6.97  
6.97  
6.97  
6.97

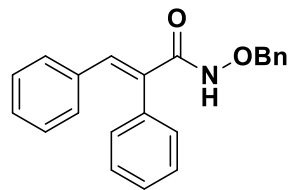

12q

<sup>1</sup>H NMR (CDCl<sub>3</sub>)

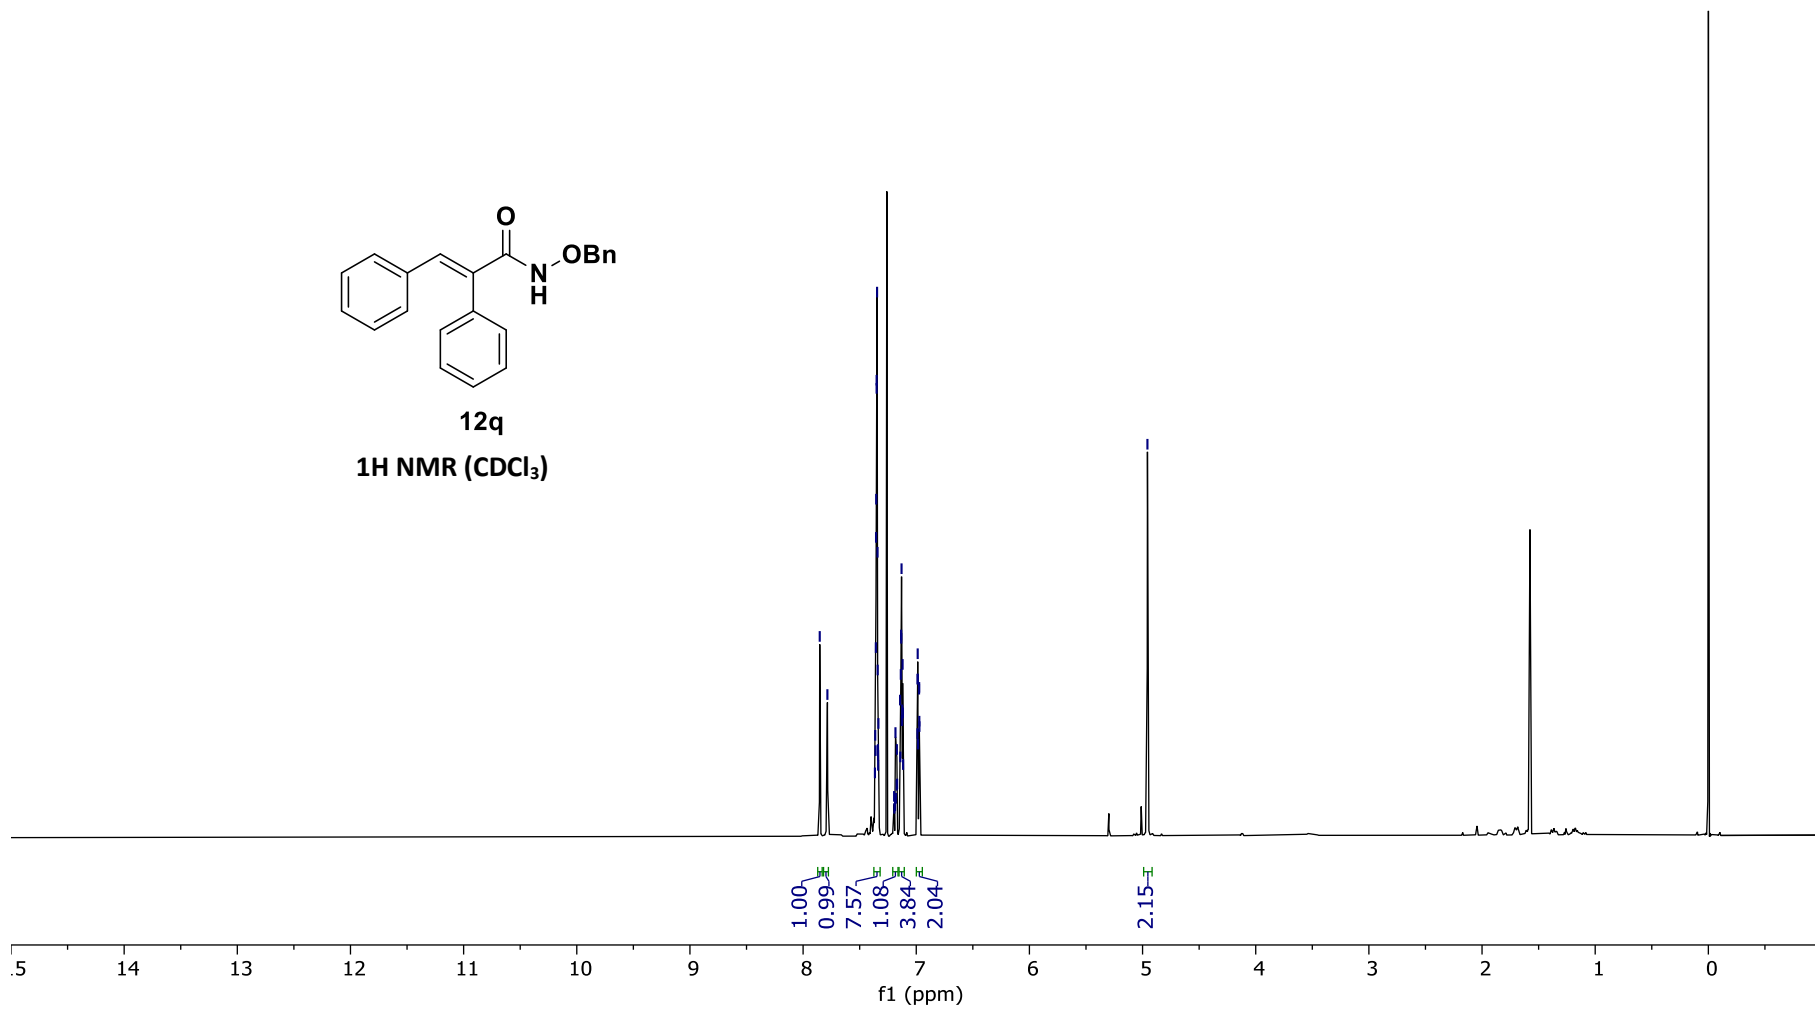

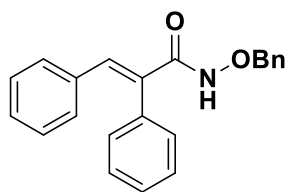

12q  
13C NMR (CDCl<sub>3</sub>)

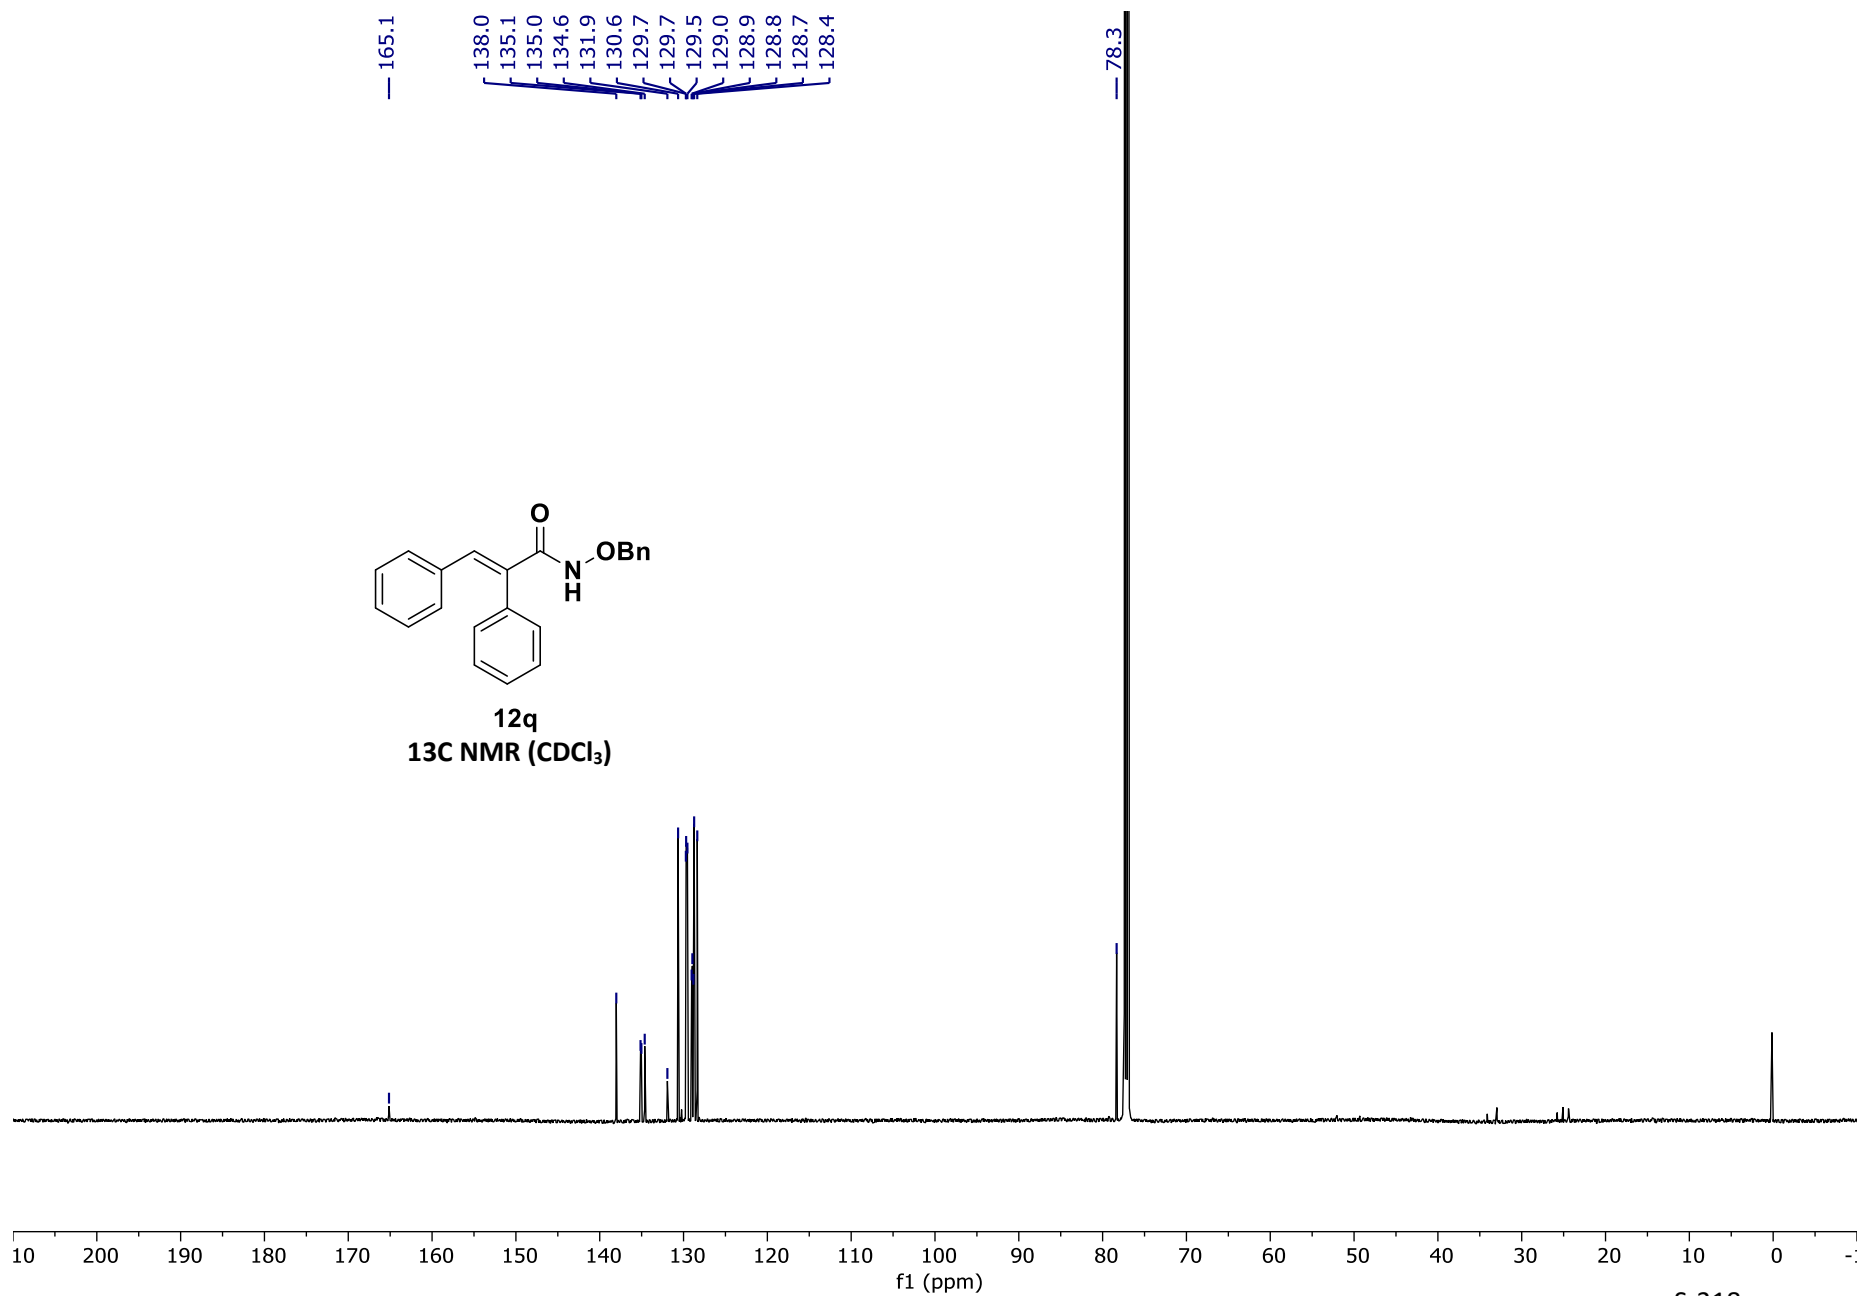

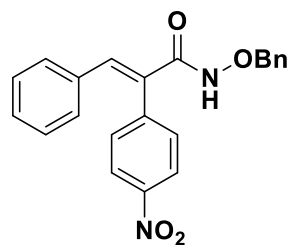

12r  
1H NMR (CDCl<sub>3</sub>)

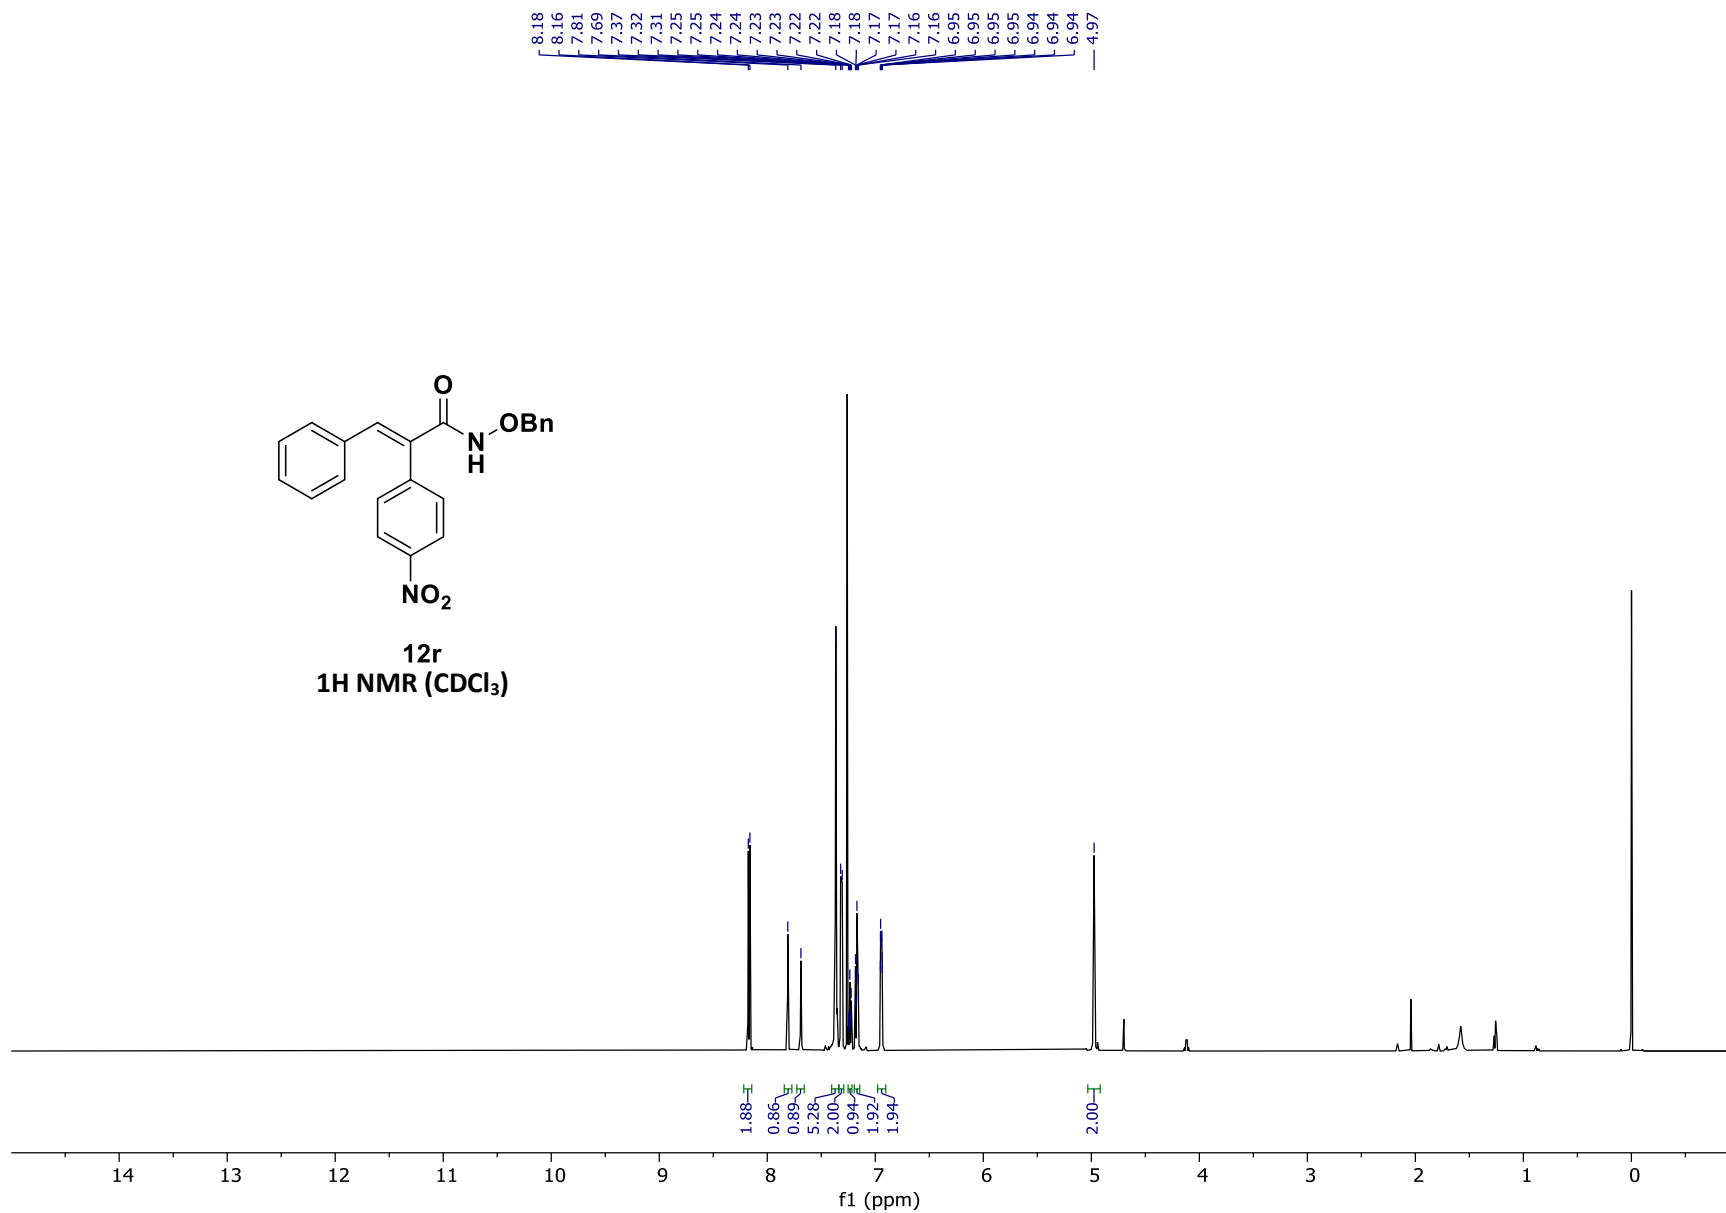

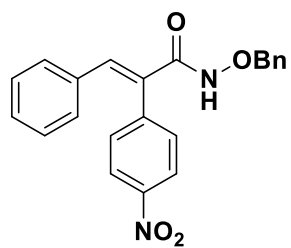

12r

<sup>13</sup>C NMR (CDCl<sub>3</sub>)

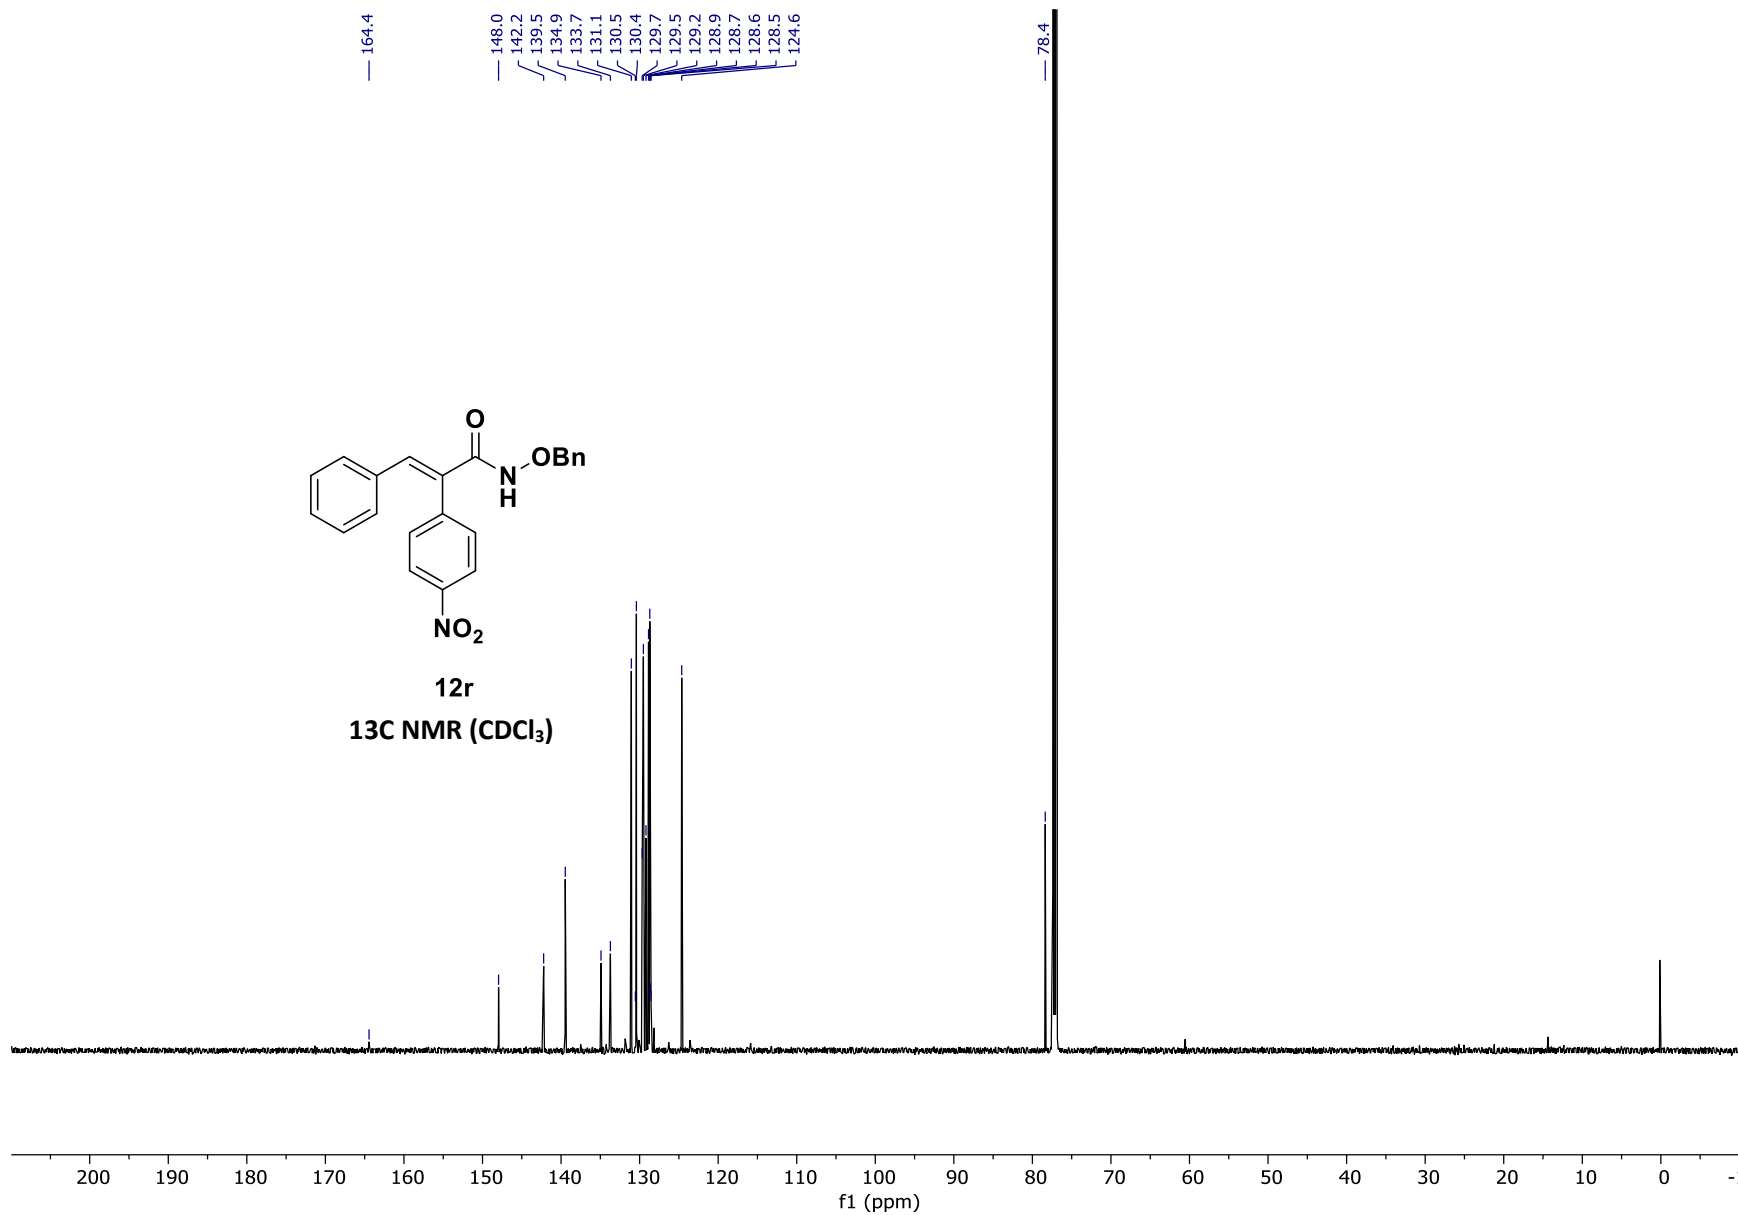

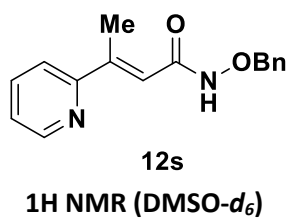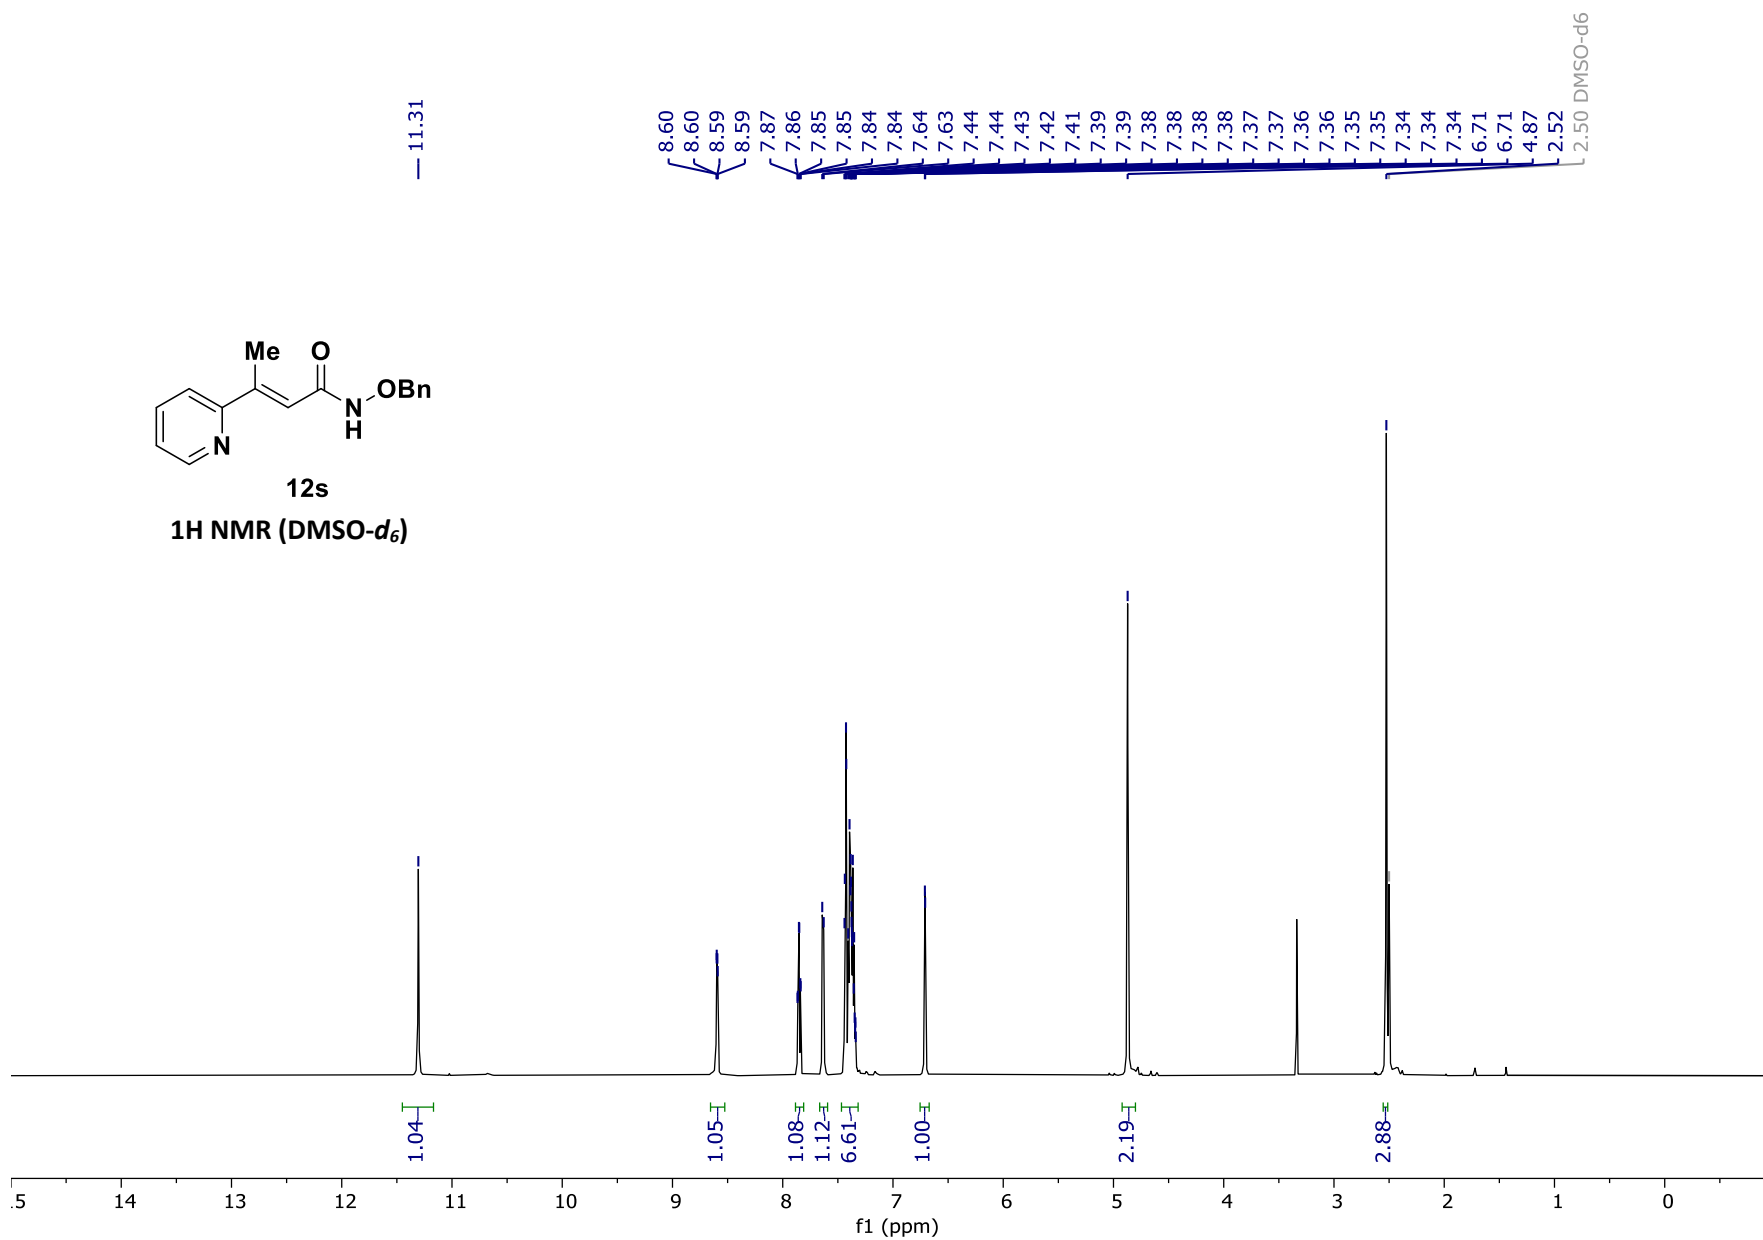

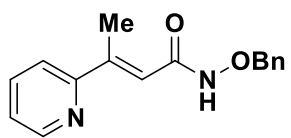

12s

<sup>13</sup>C NMR (DMSO-*d*<sub>6</sub>)

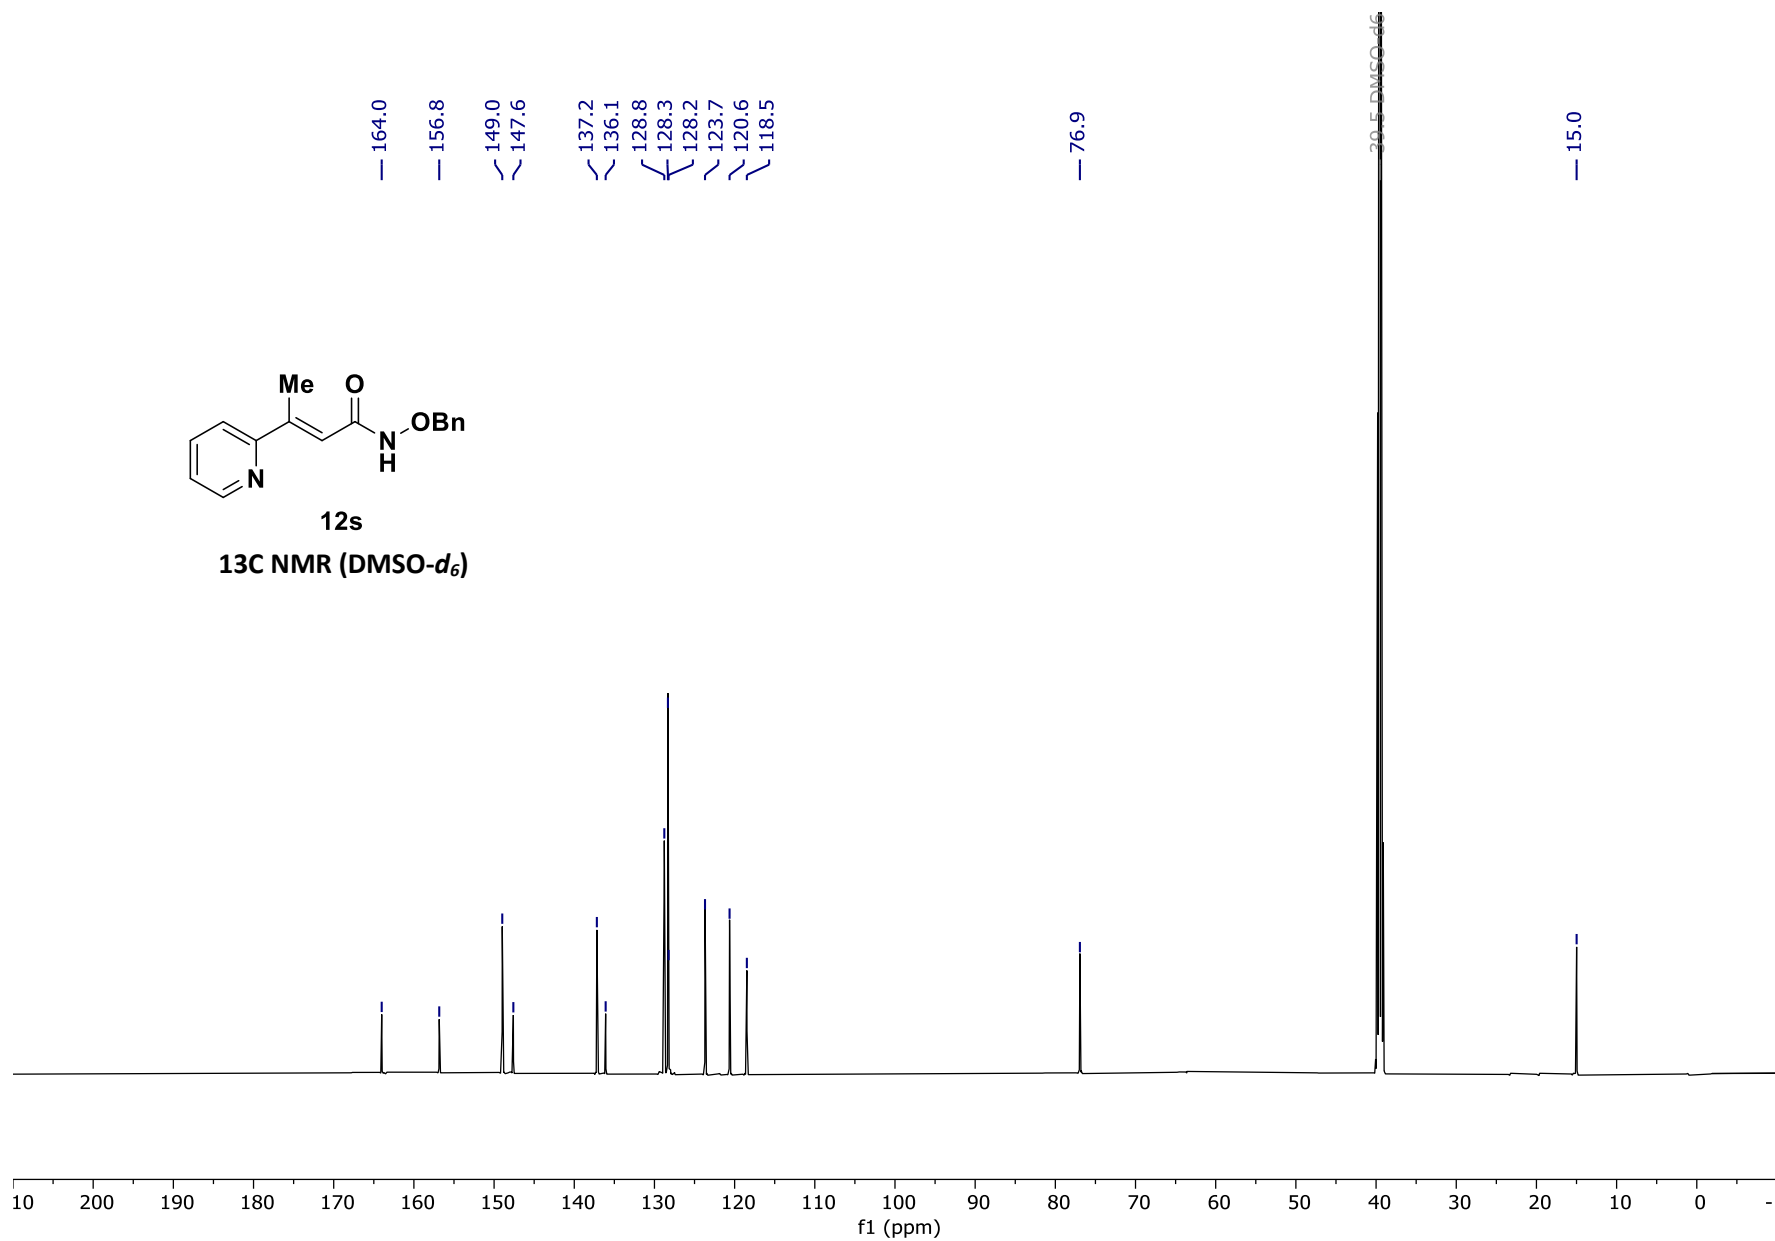

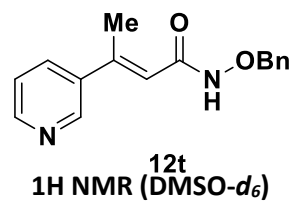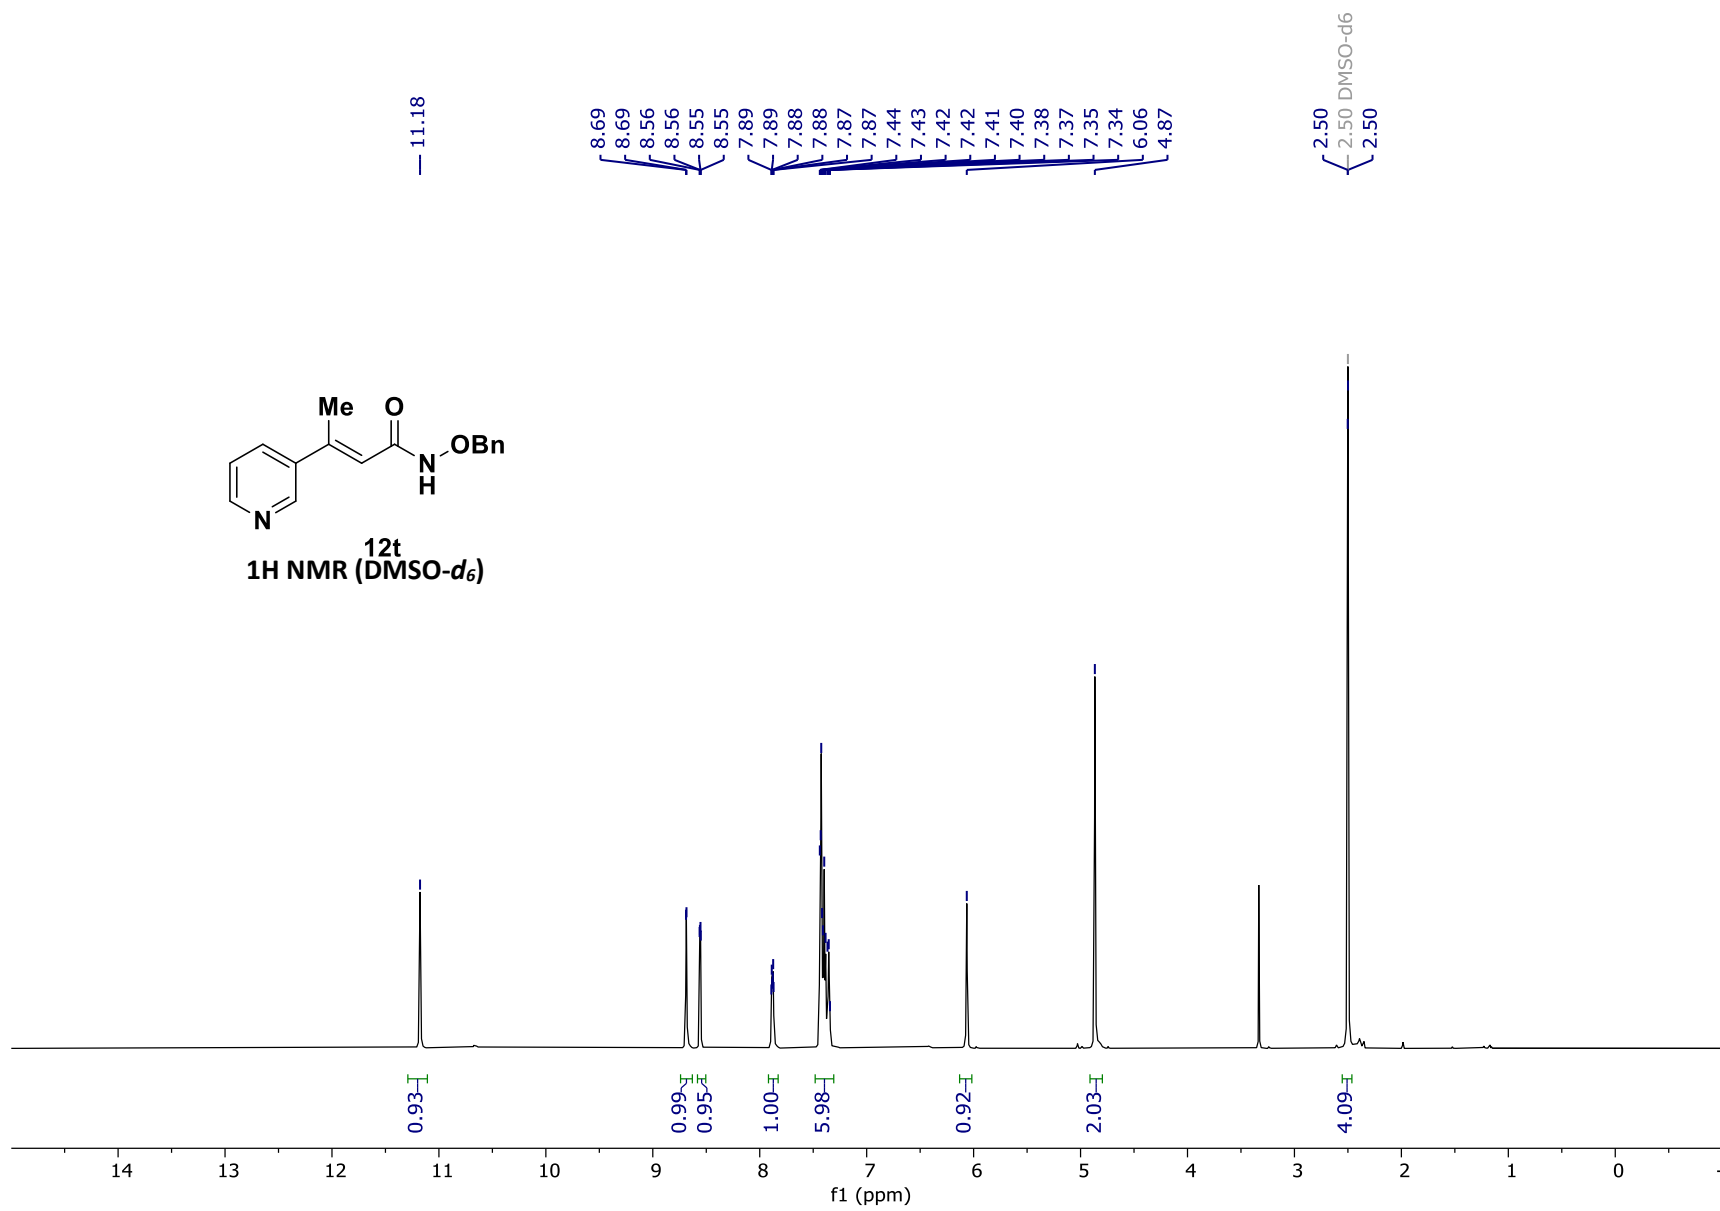

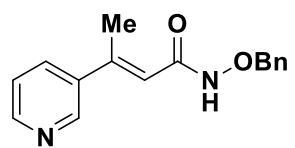

12t

<sup>13</sup>C NMR (DMSO-*d*<sub>6</sub>)

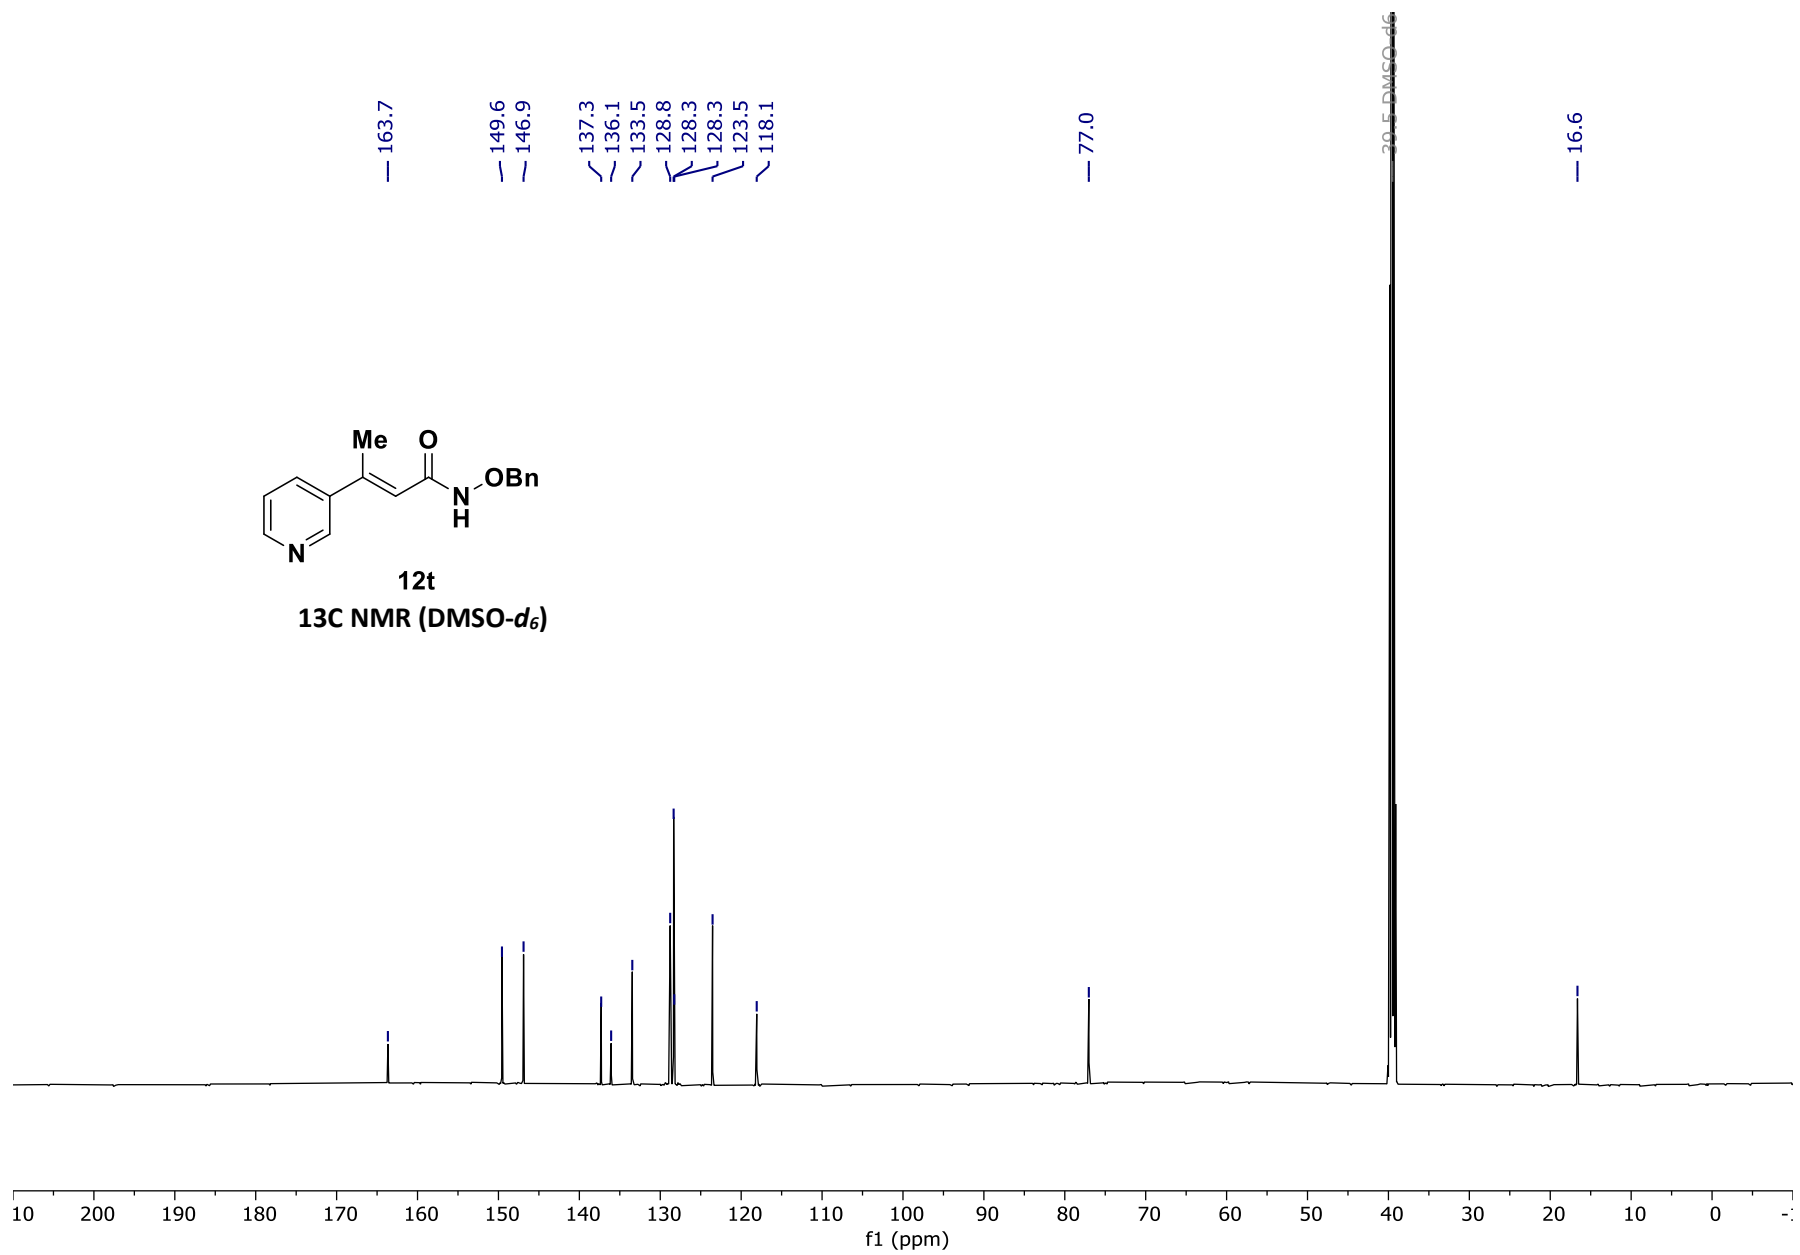



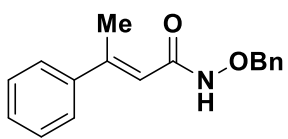

12v

<sup>1</sup>H NMR (DMSO-*d*<sub>6</sub>)

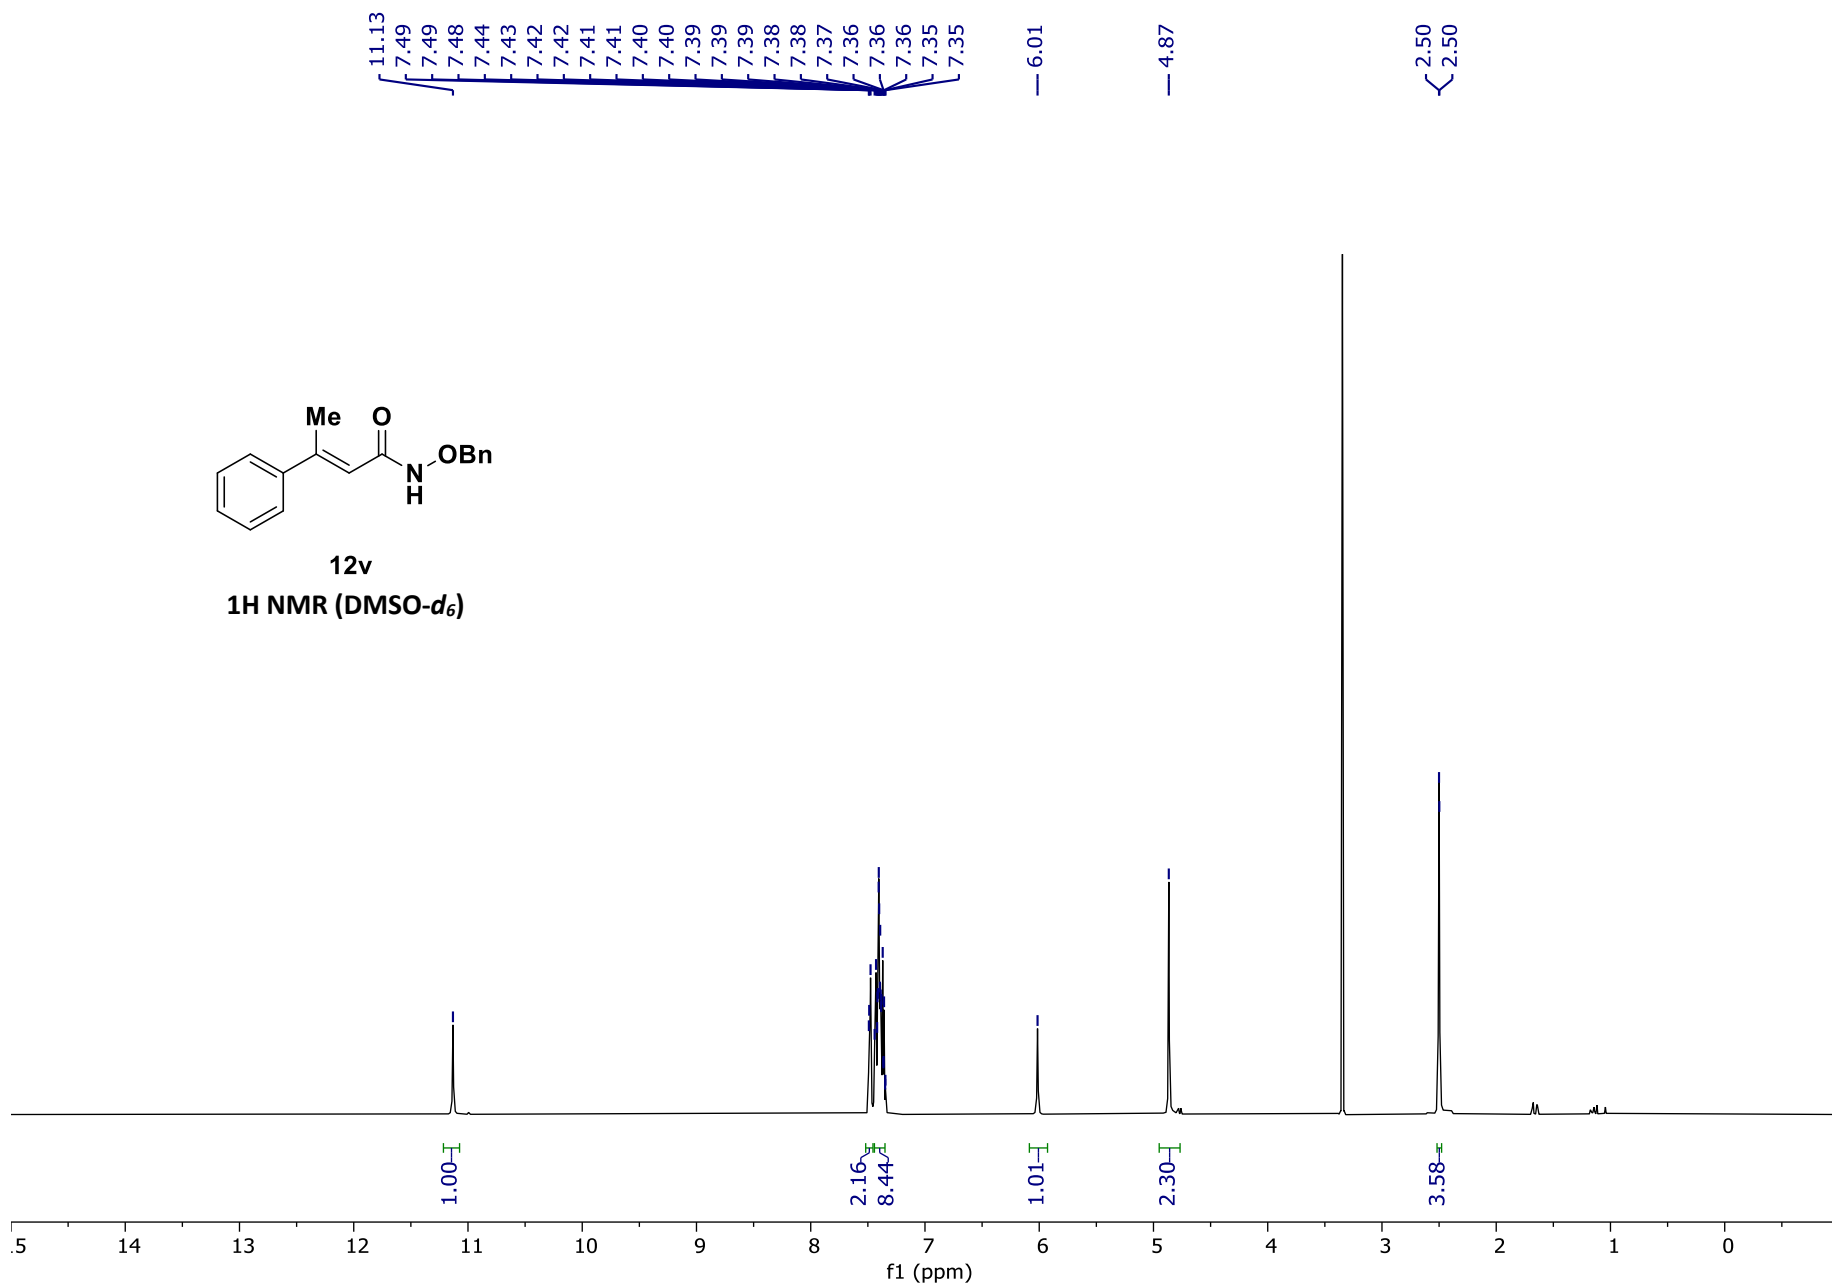

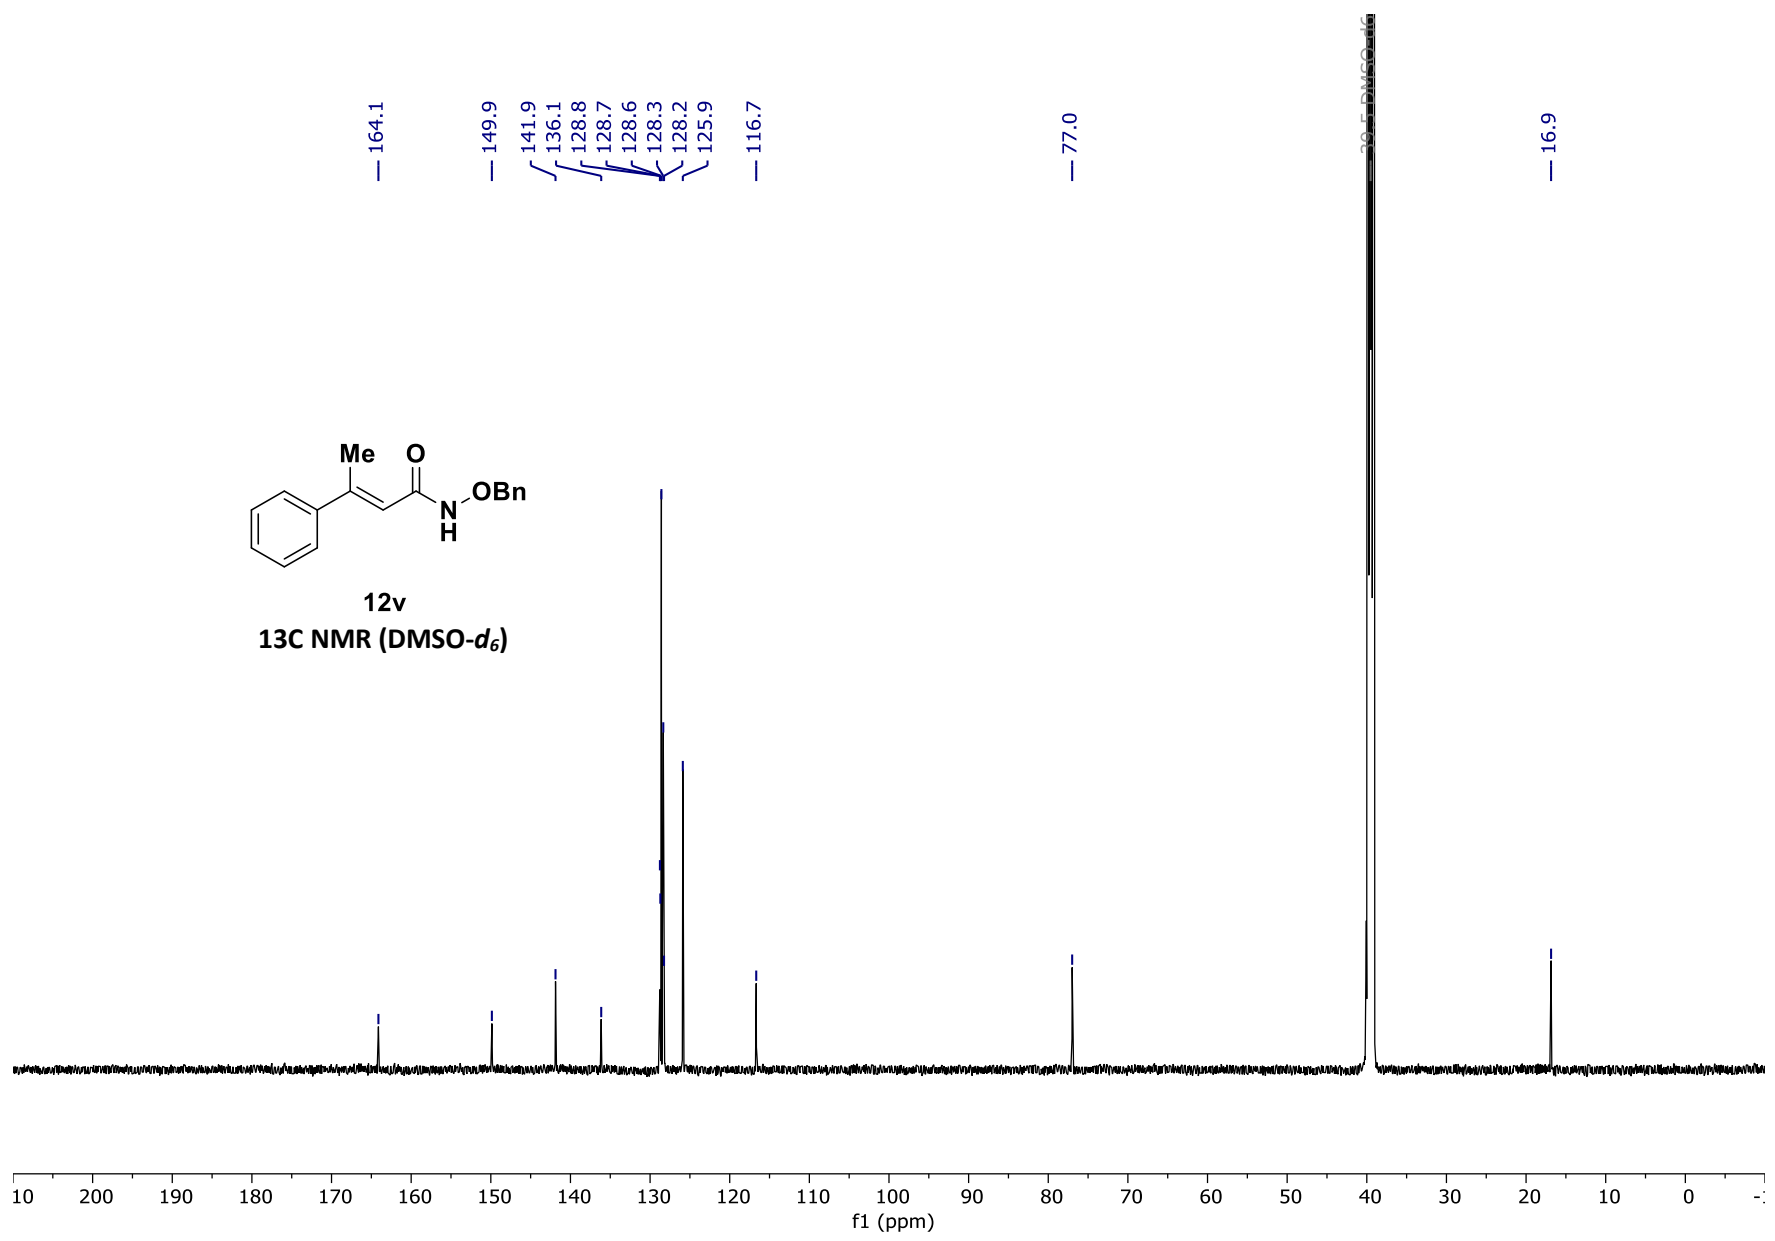

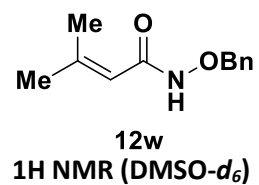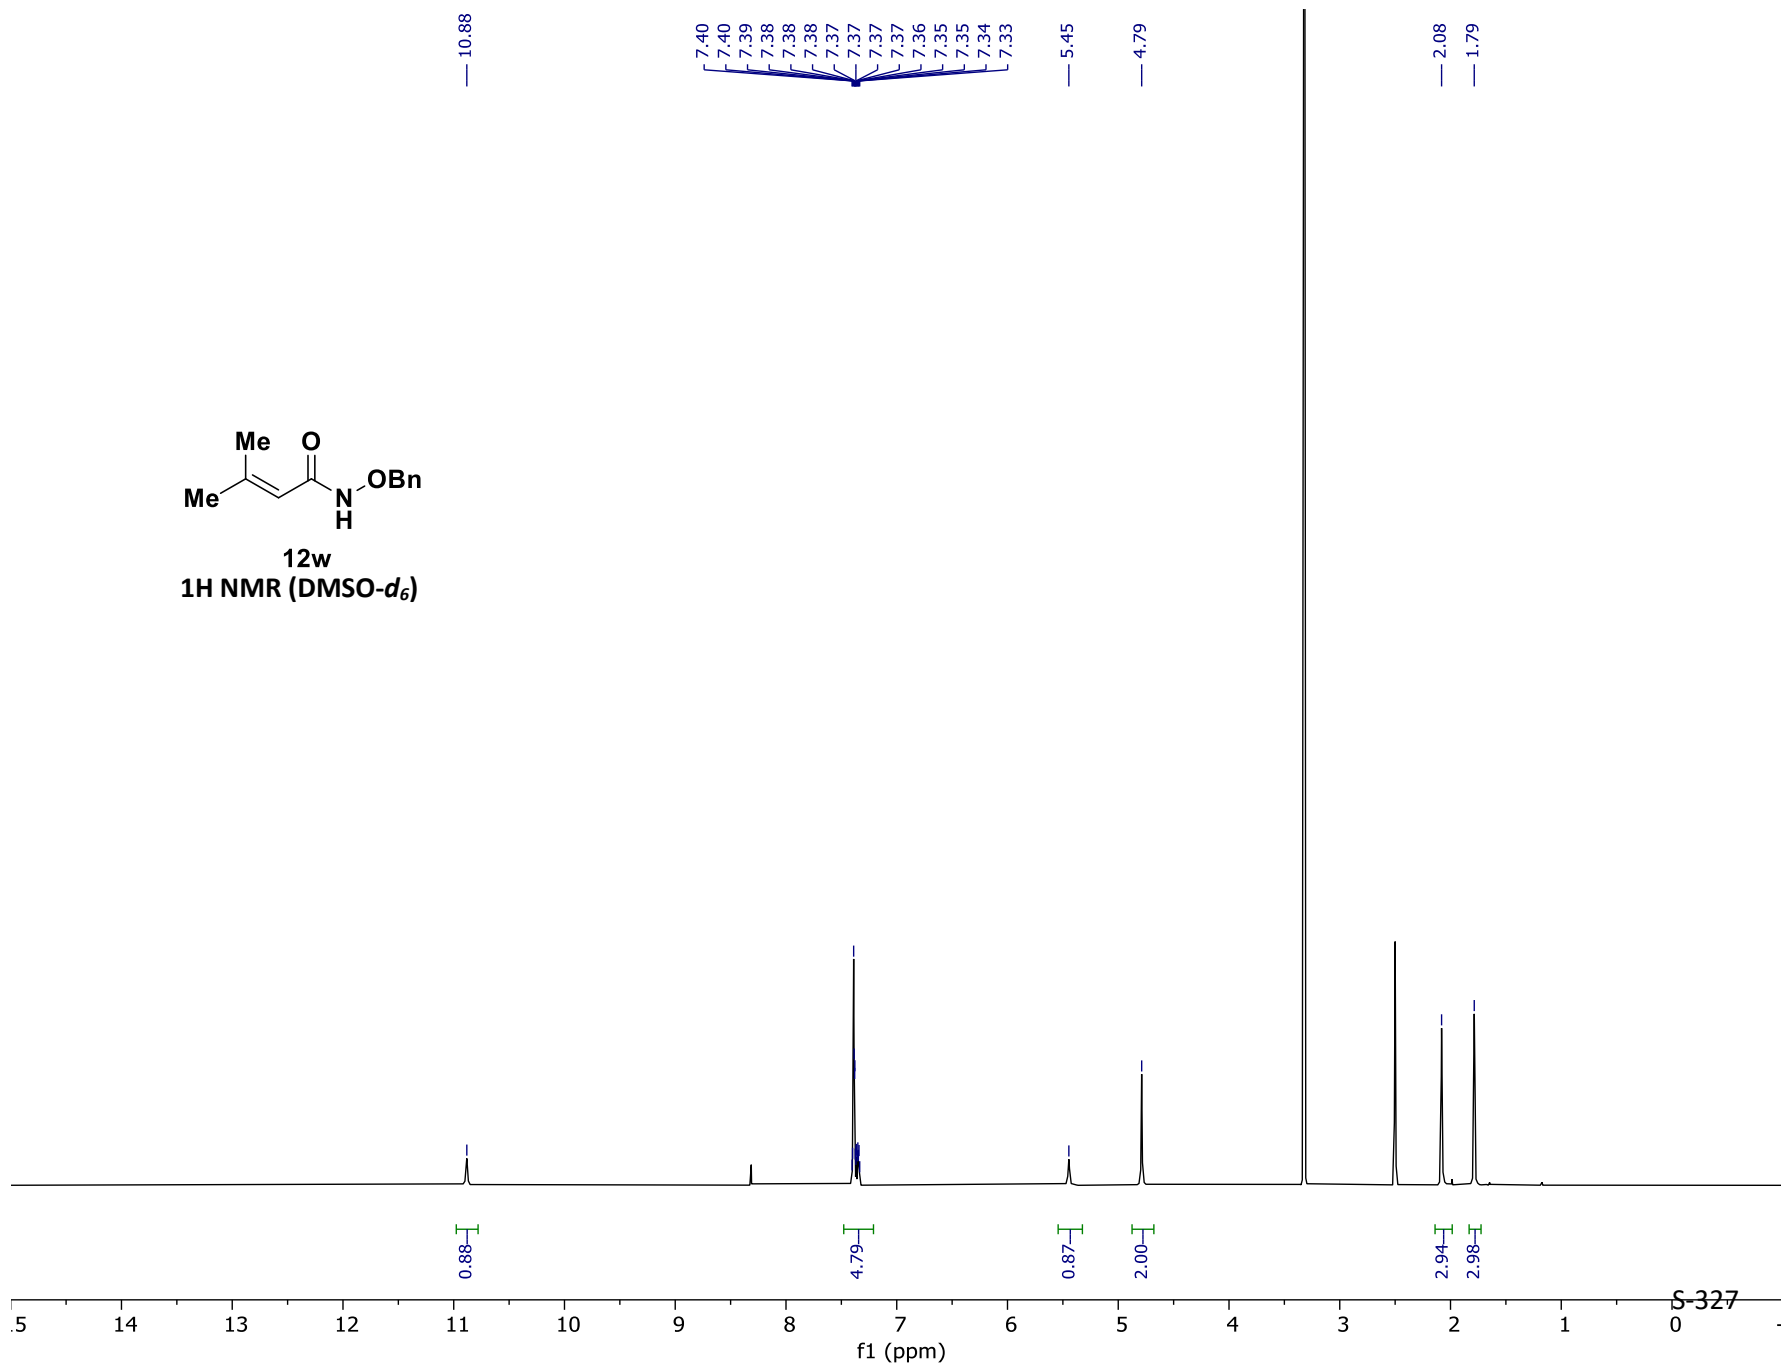

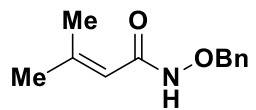

12w

<sup>13</sup>C NMR (DMSO-*d*<sub>6</sub>)

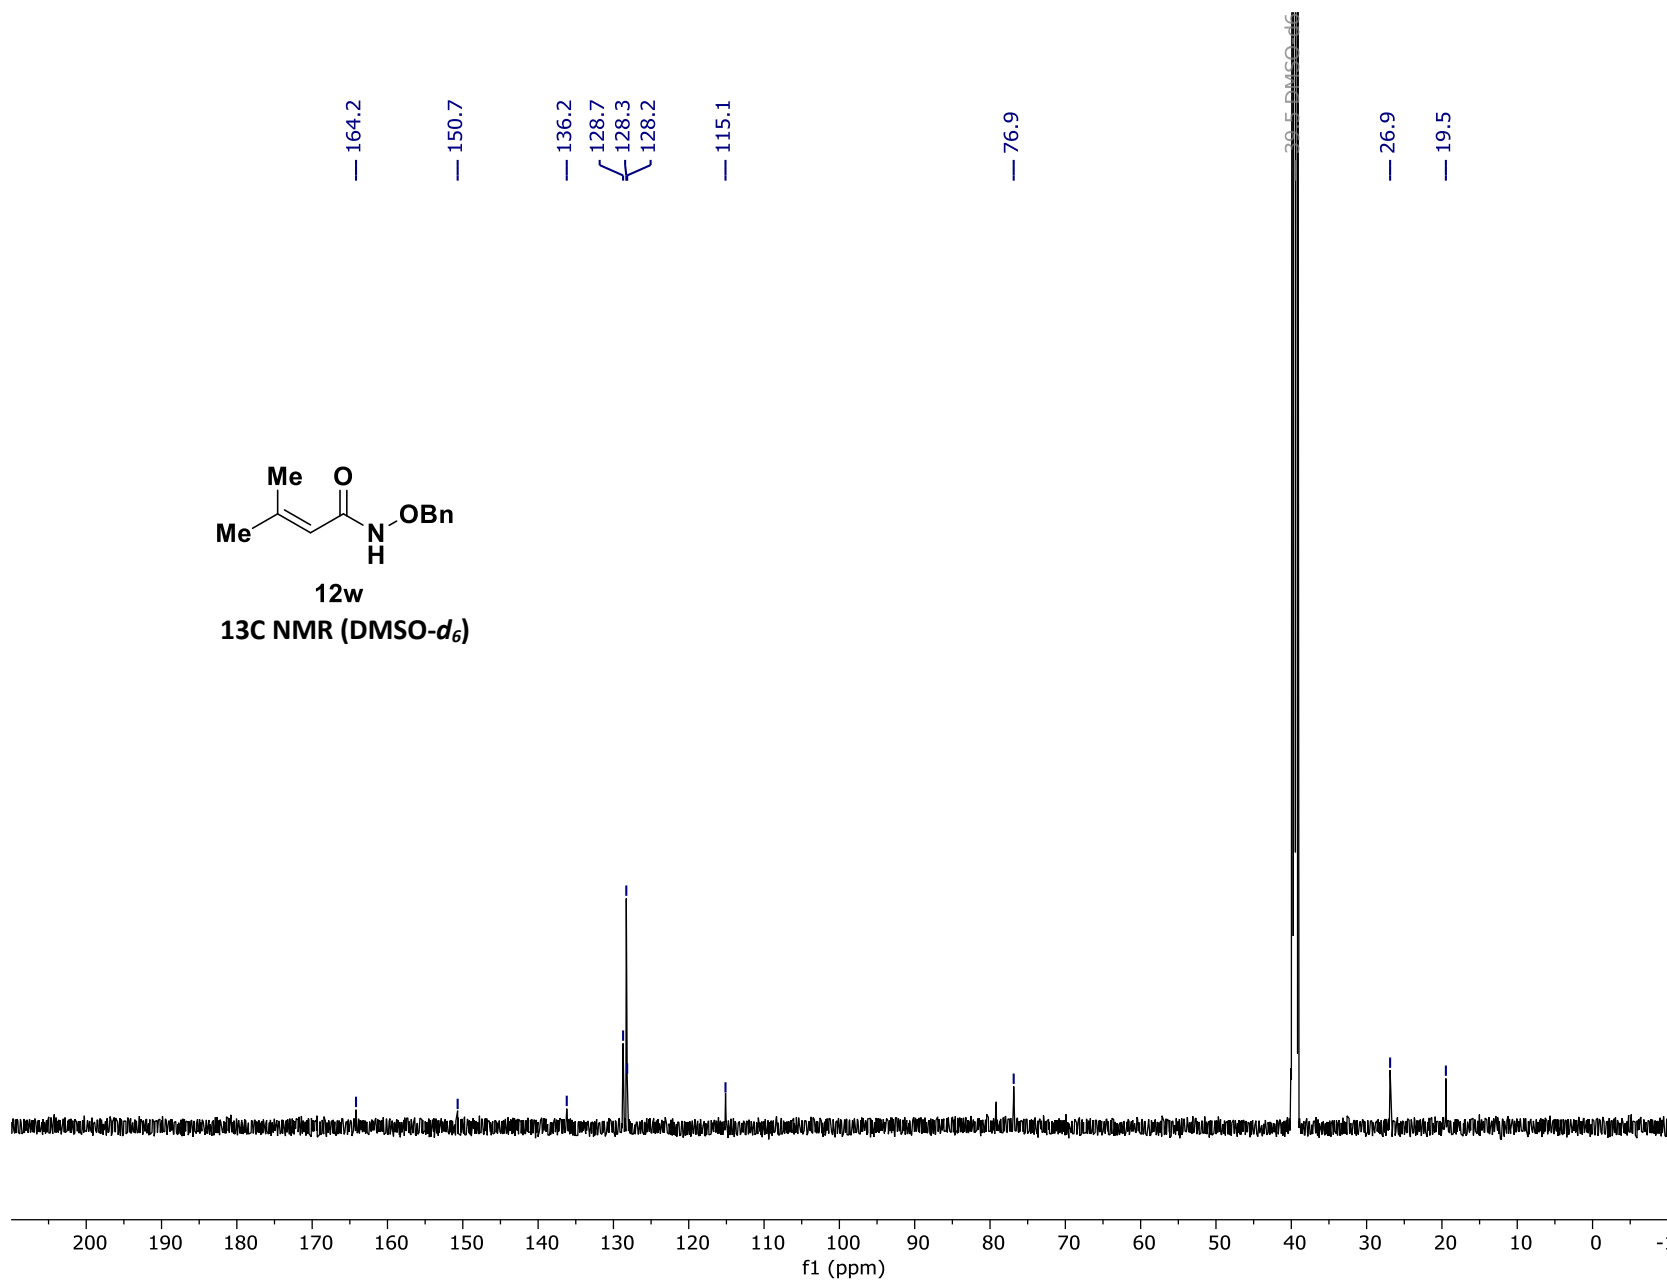

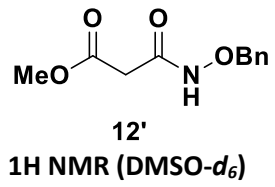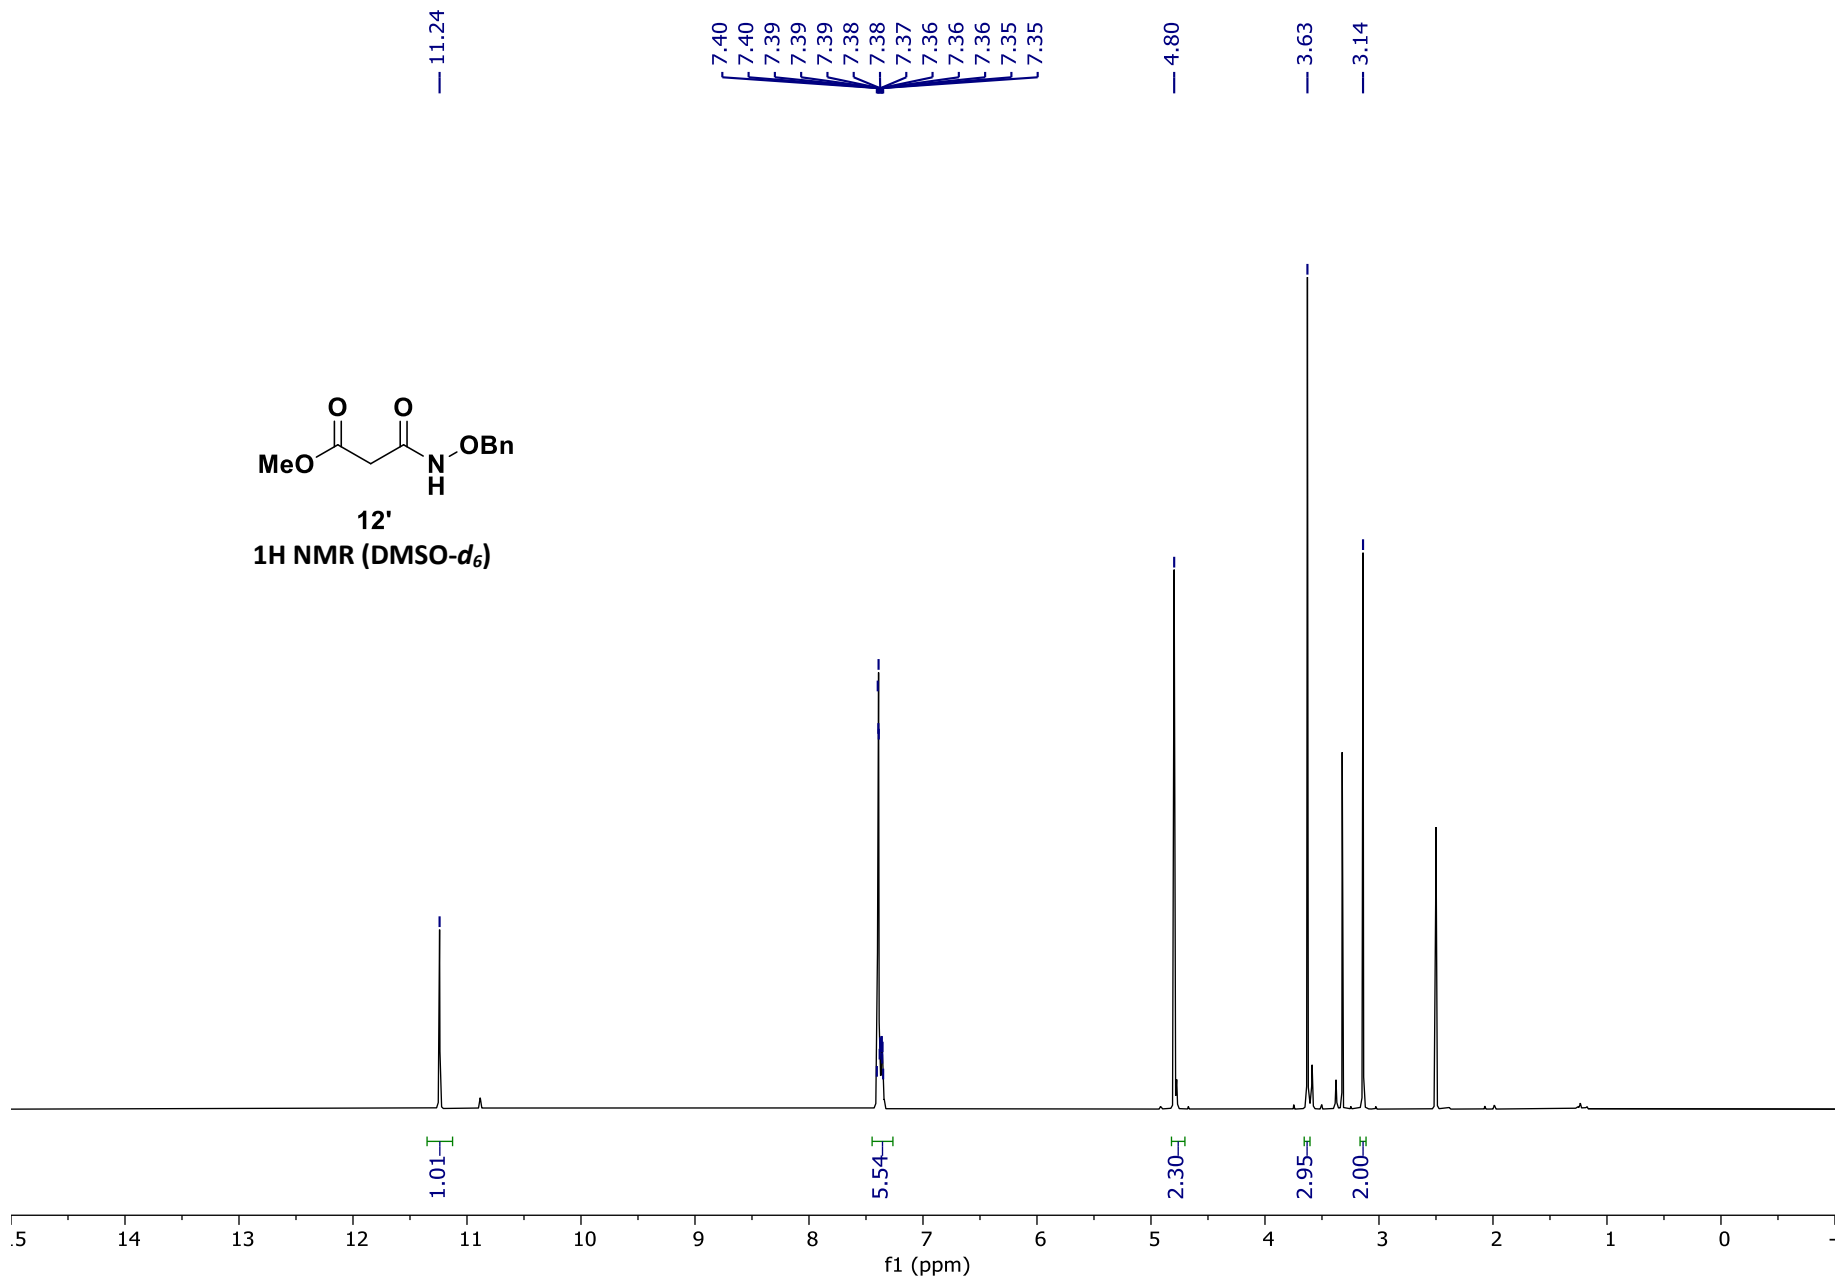

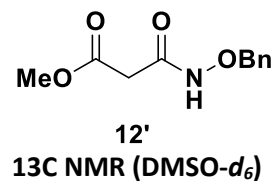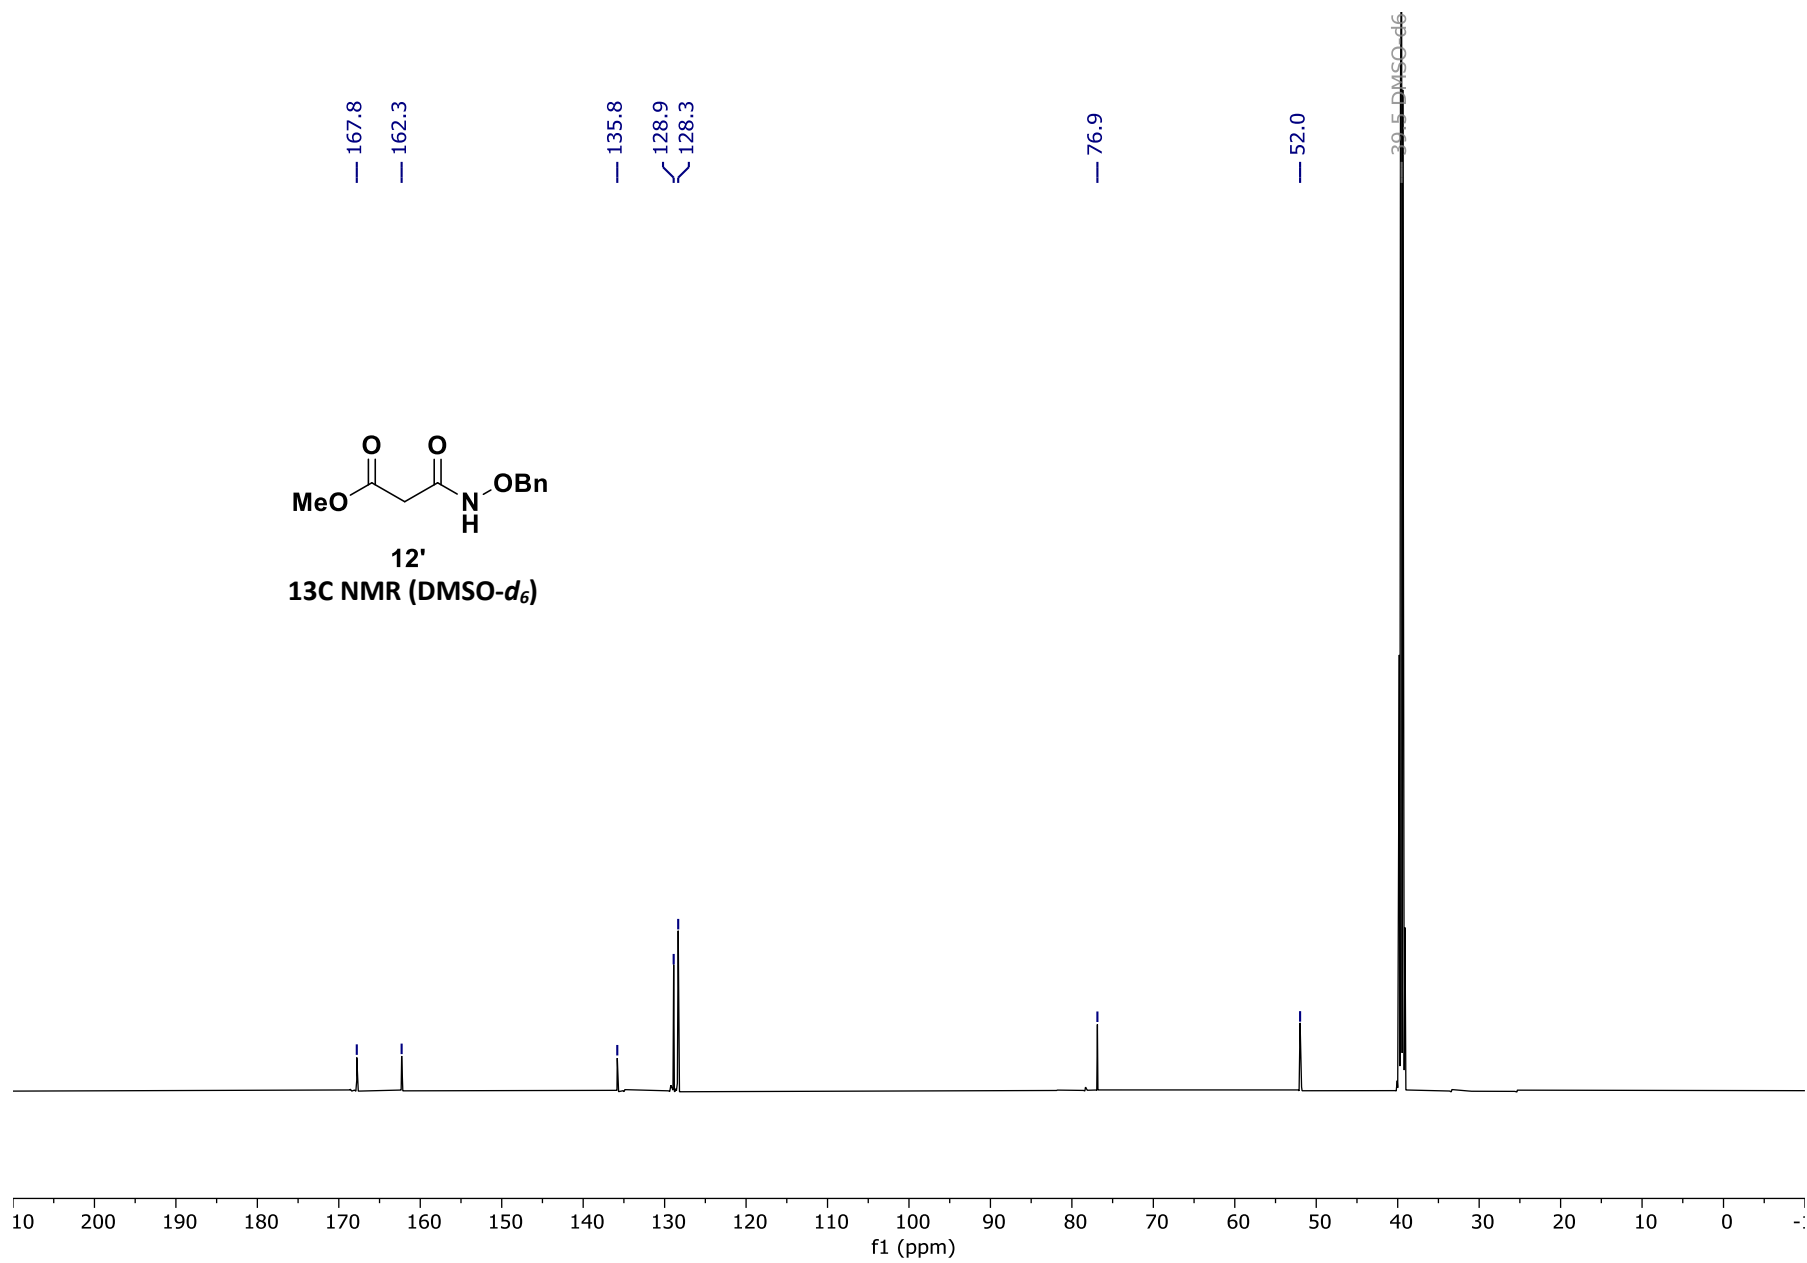

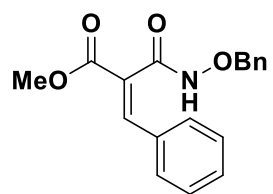

12x

<sup>1</sup>H NMR (DMSO-*d*<sub>6</sub>)

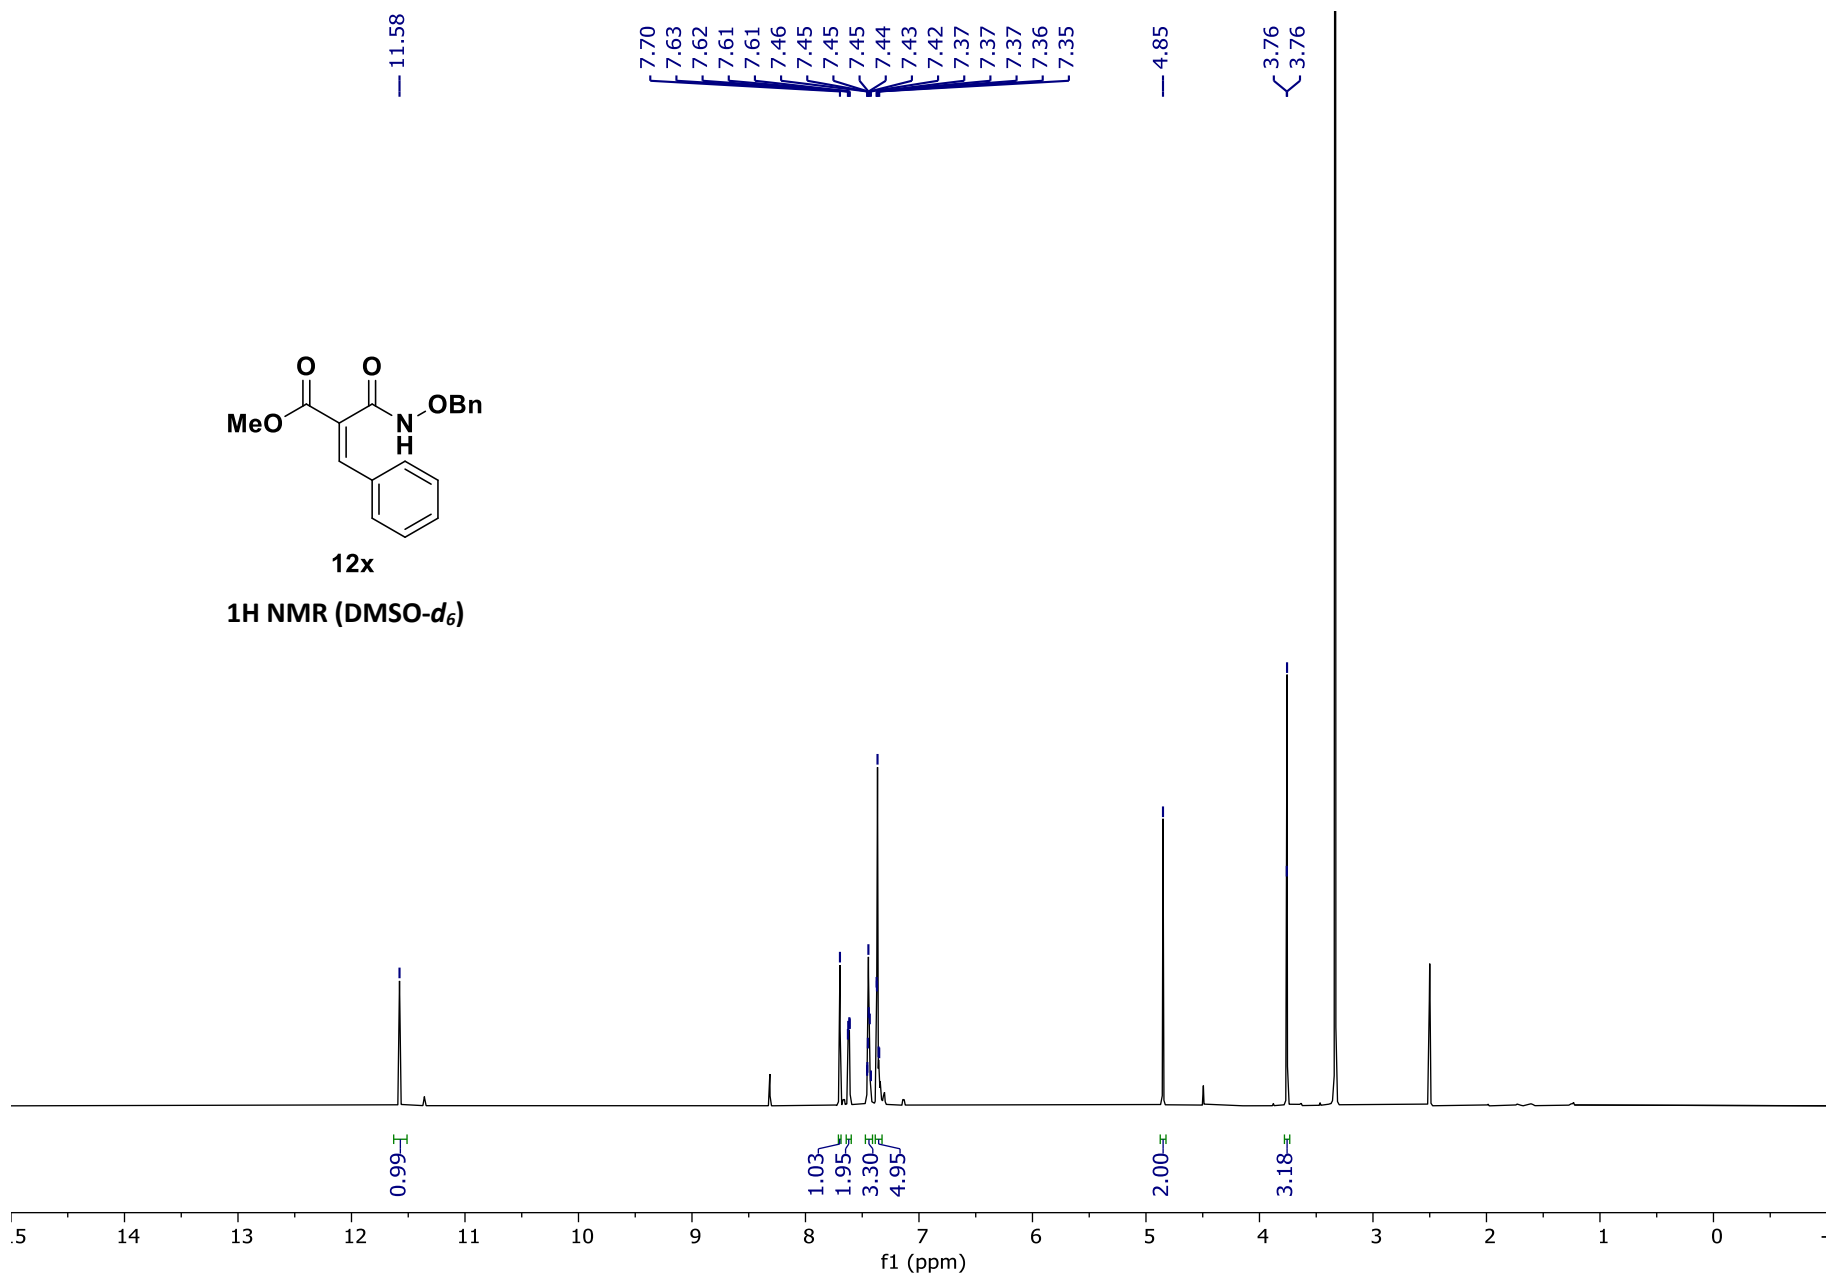

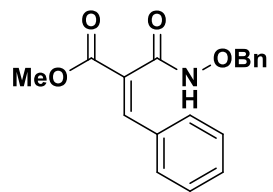

12x

<sup>13</sup>C NMR (DMSO-*d*<sub>6</sub>)

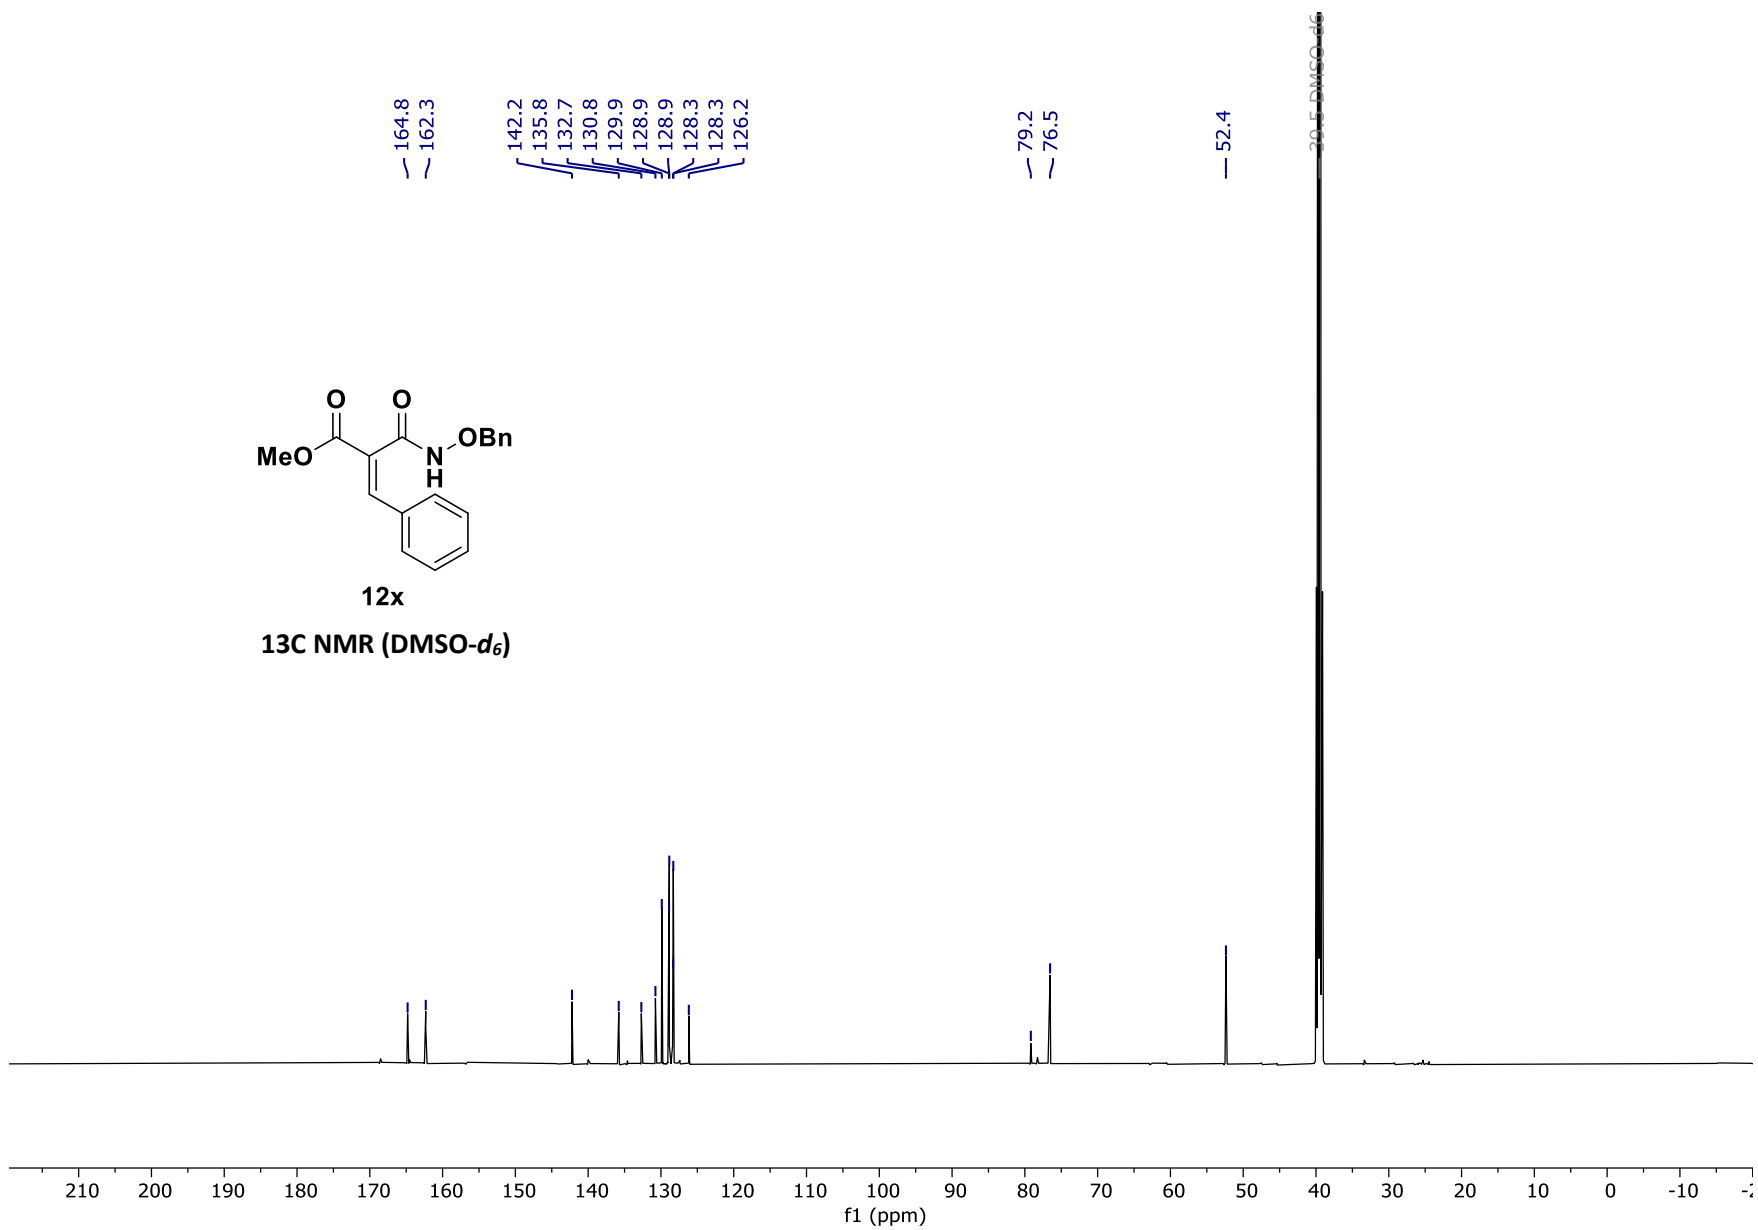



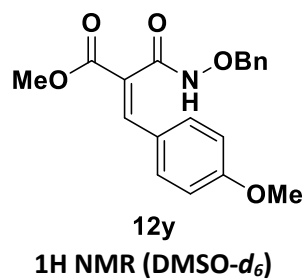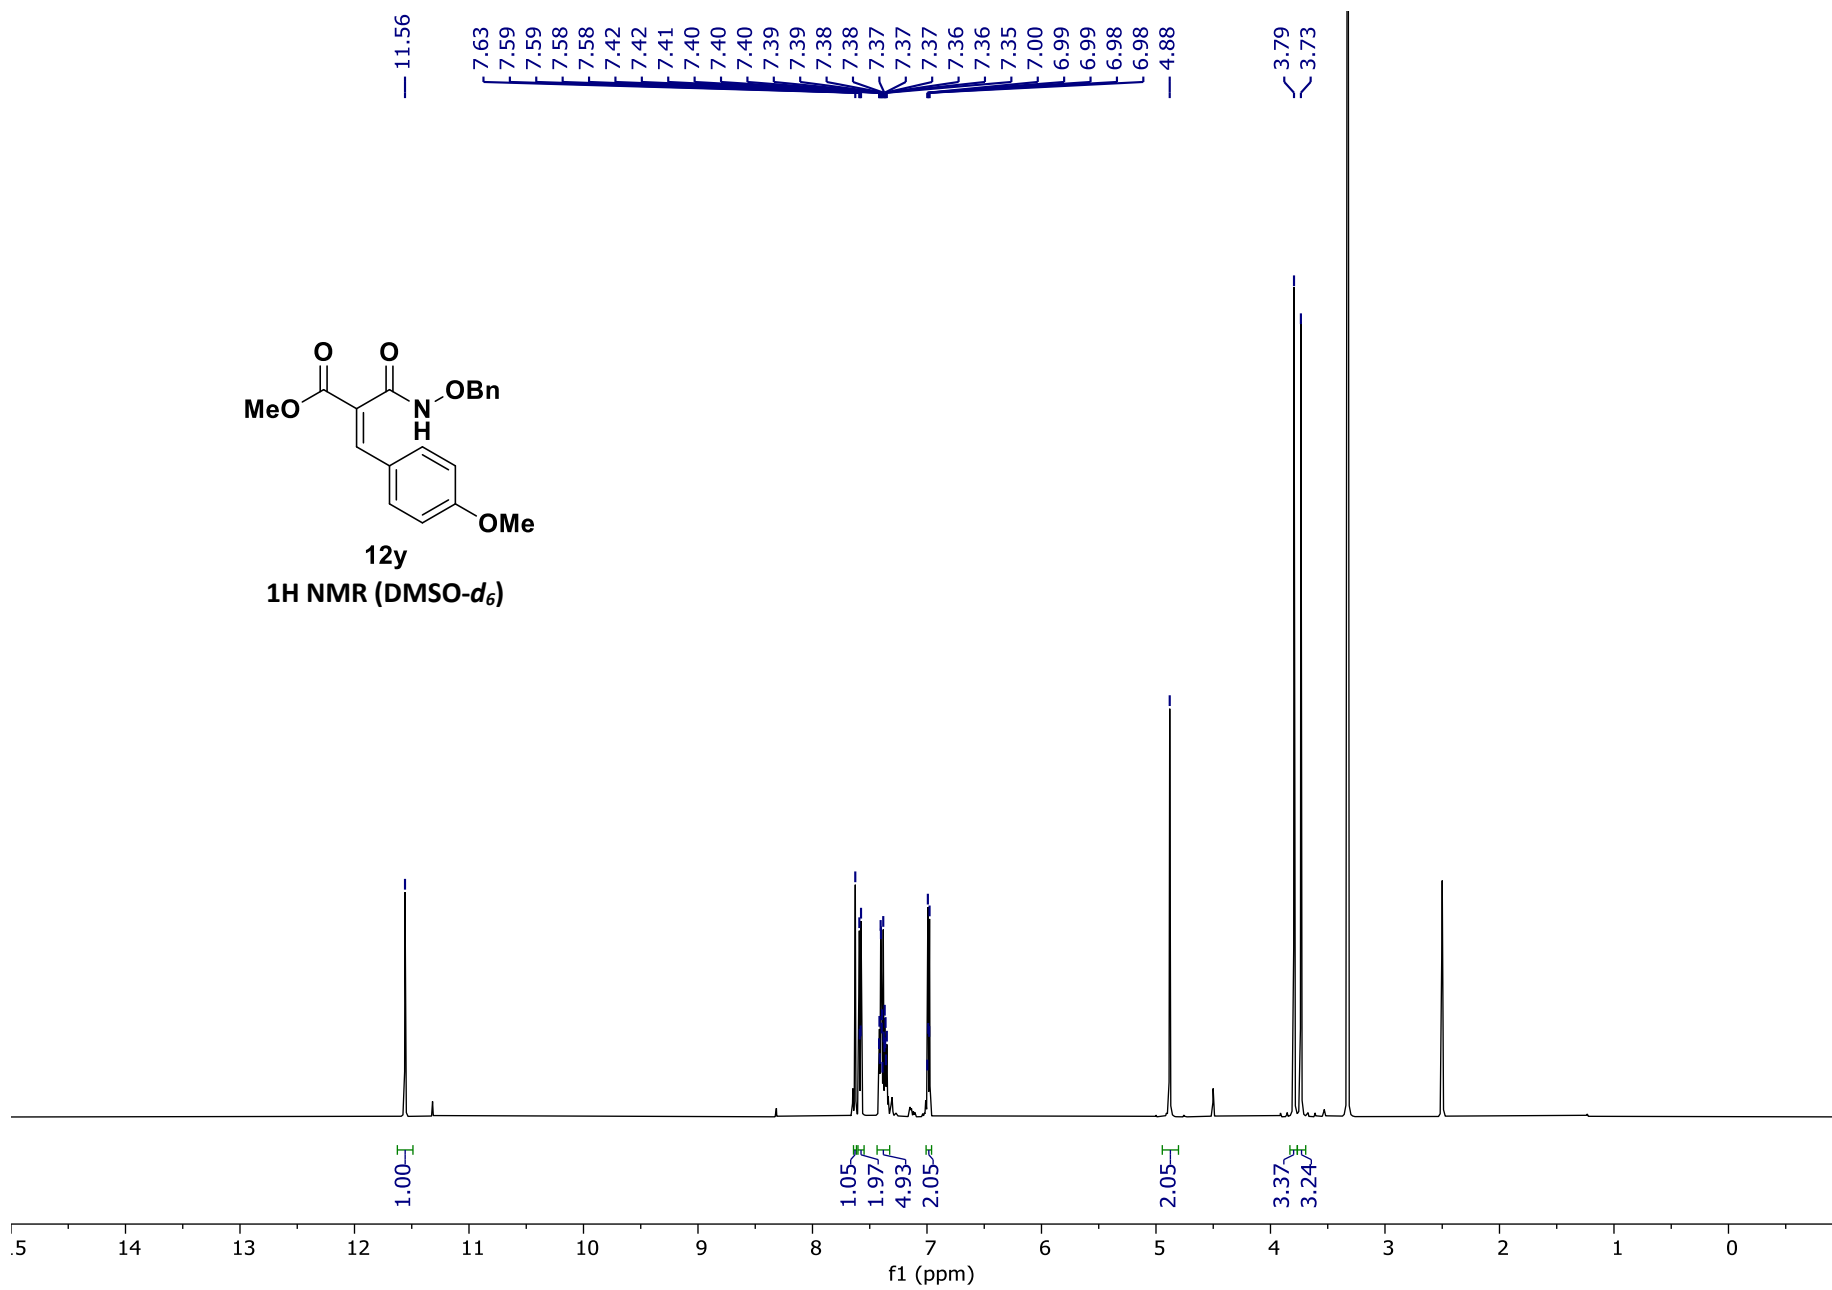

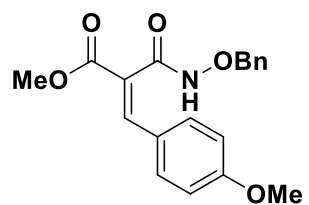

12y

13C NMR (DMSO-d<sub>6</sub>)

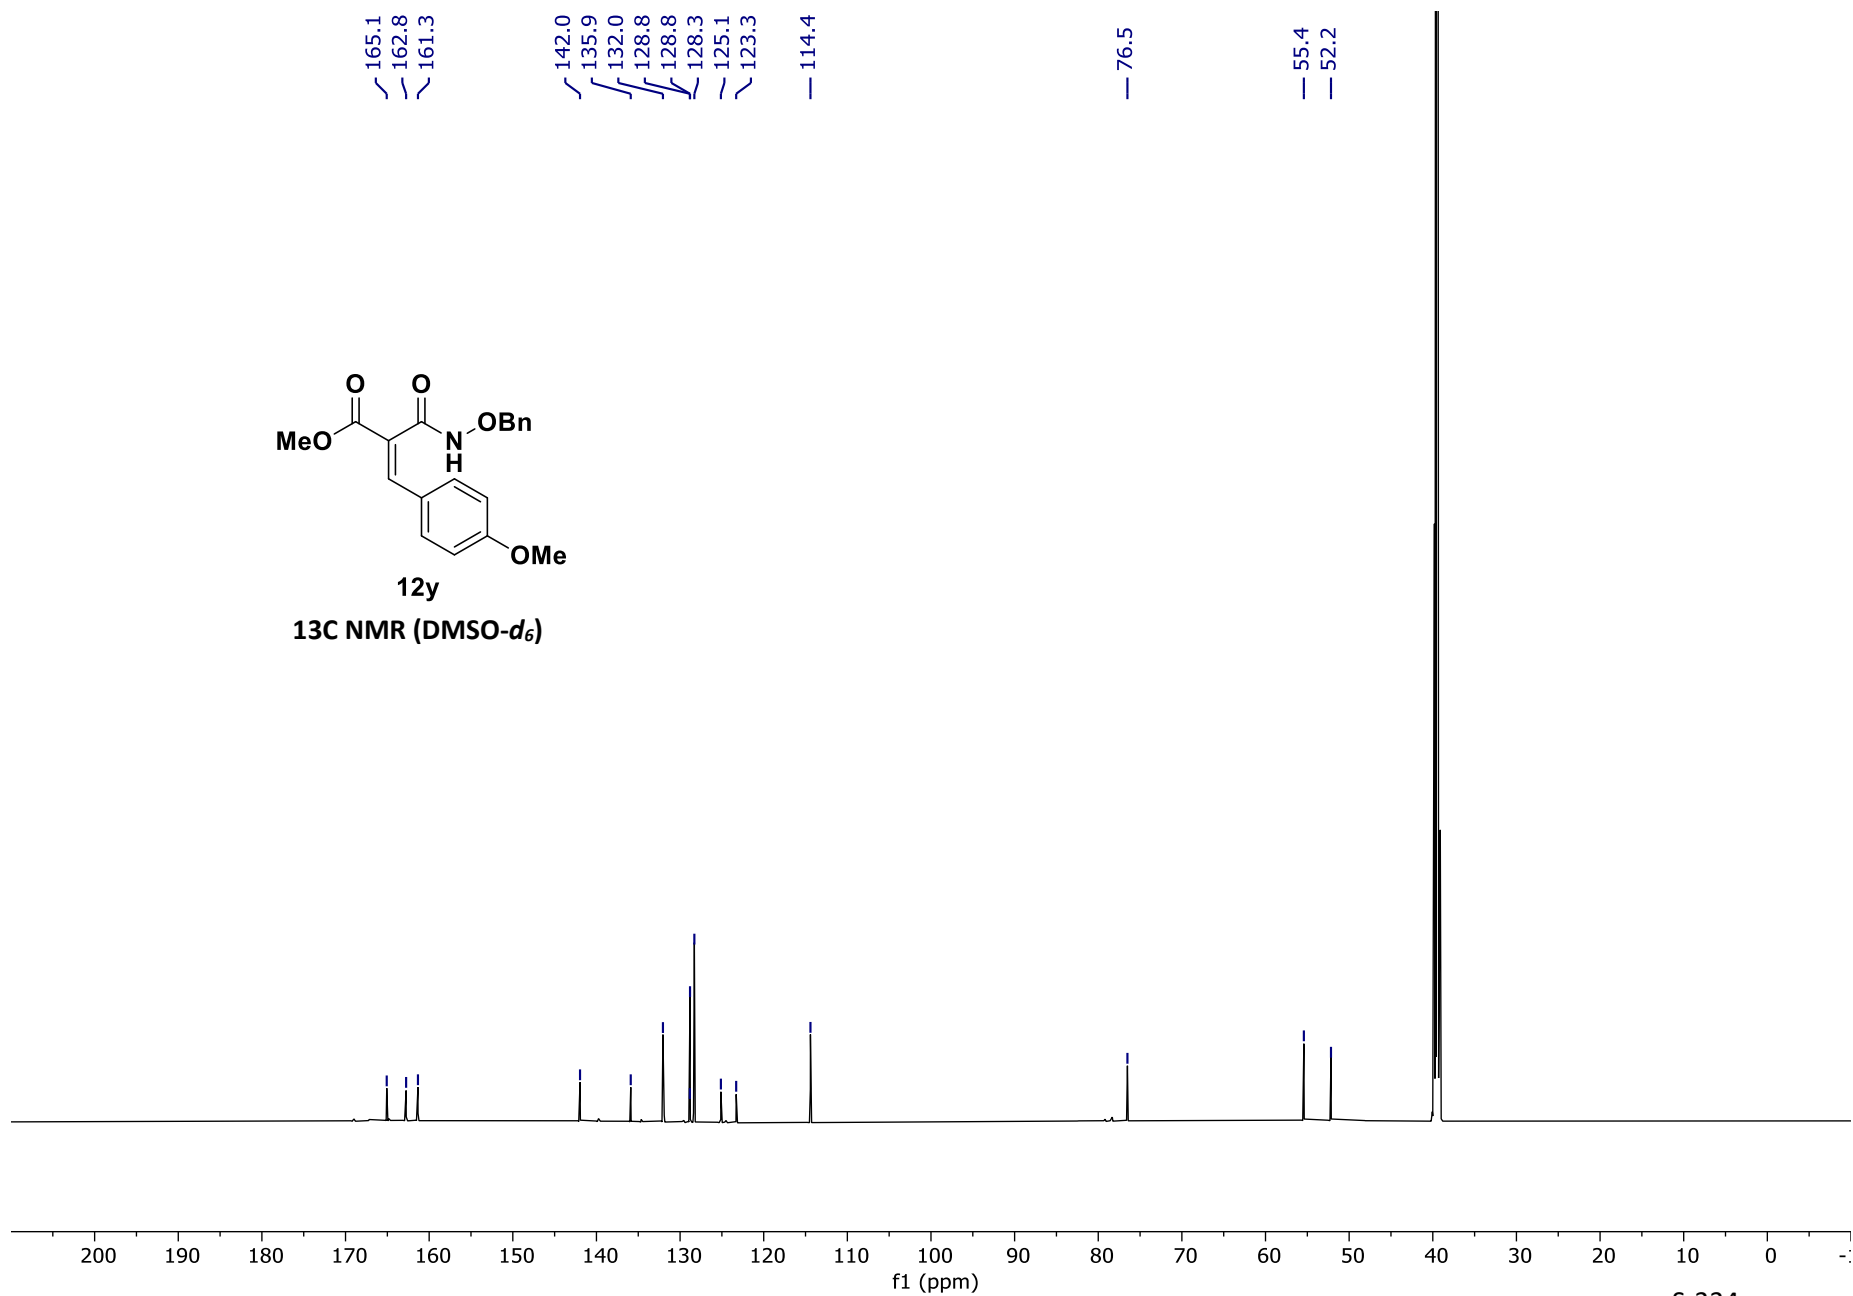

S-334

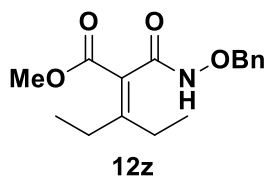

**<sup>1</sup>H NMR (DMSO-*d*<sub>6</sub>)**

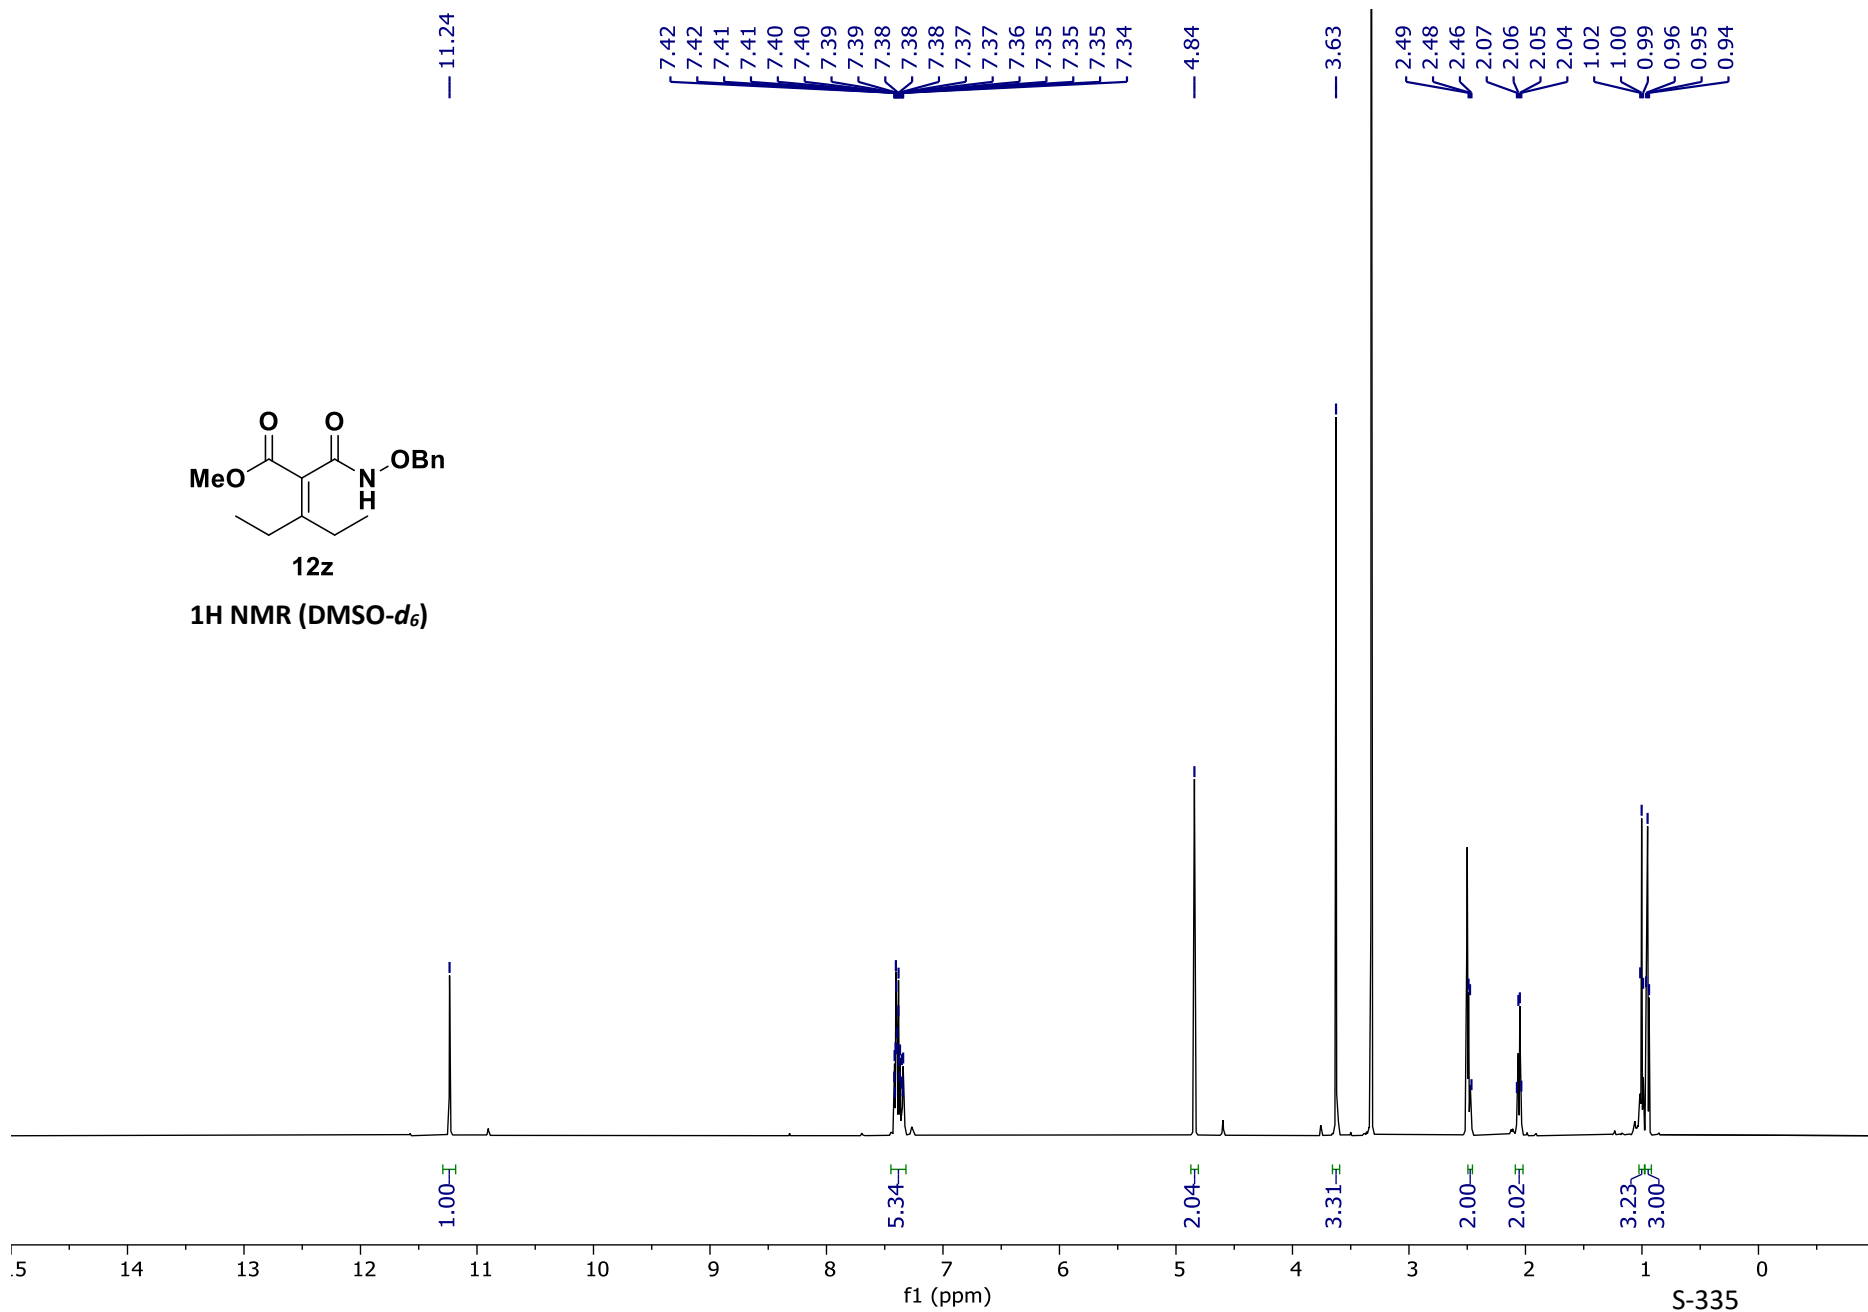

S-335

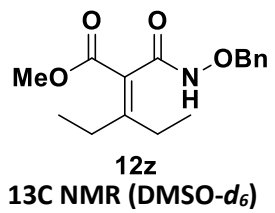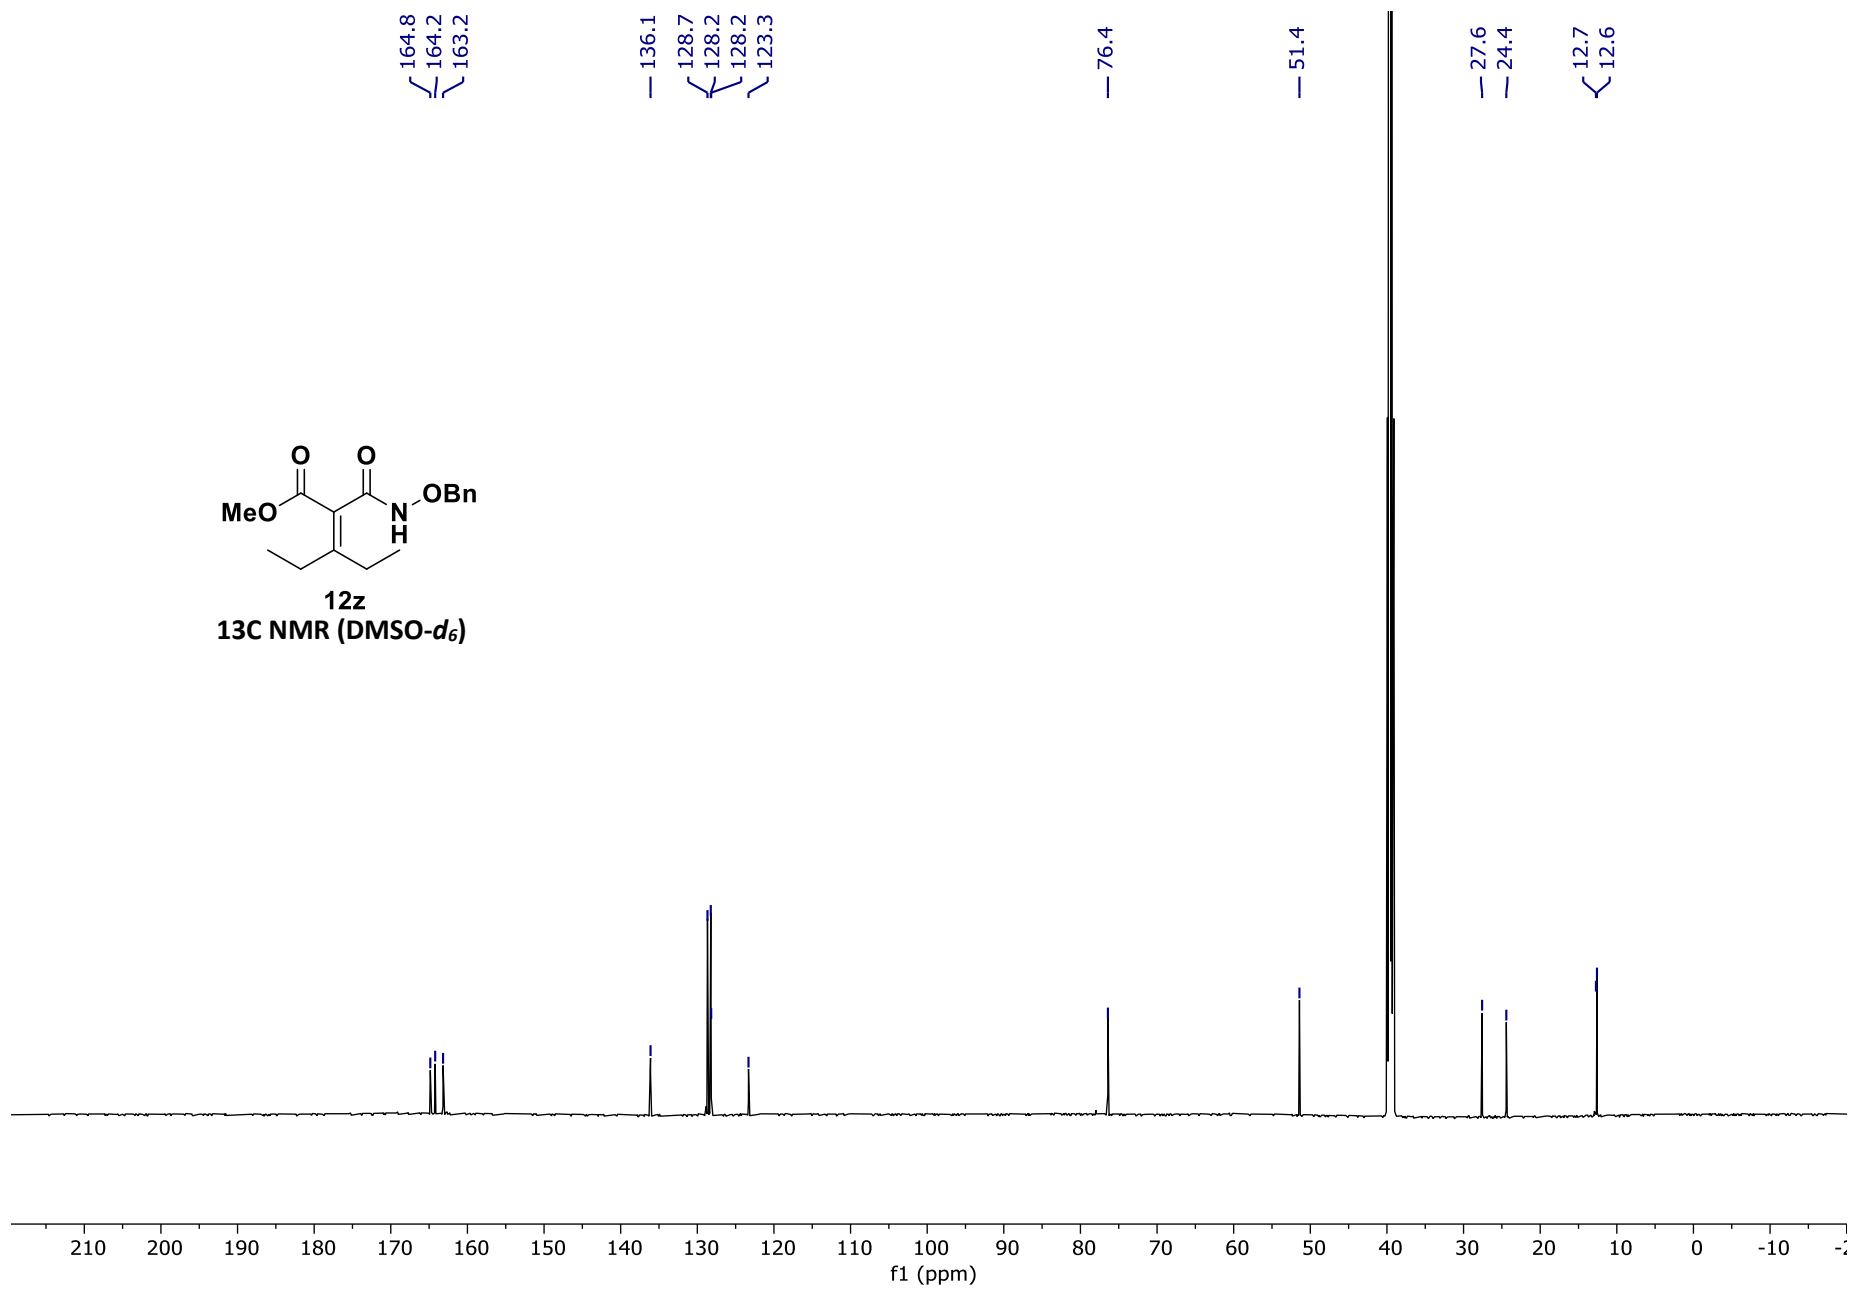

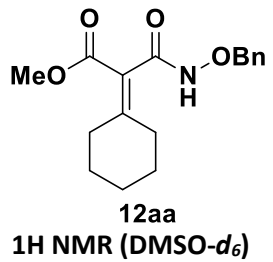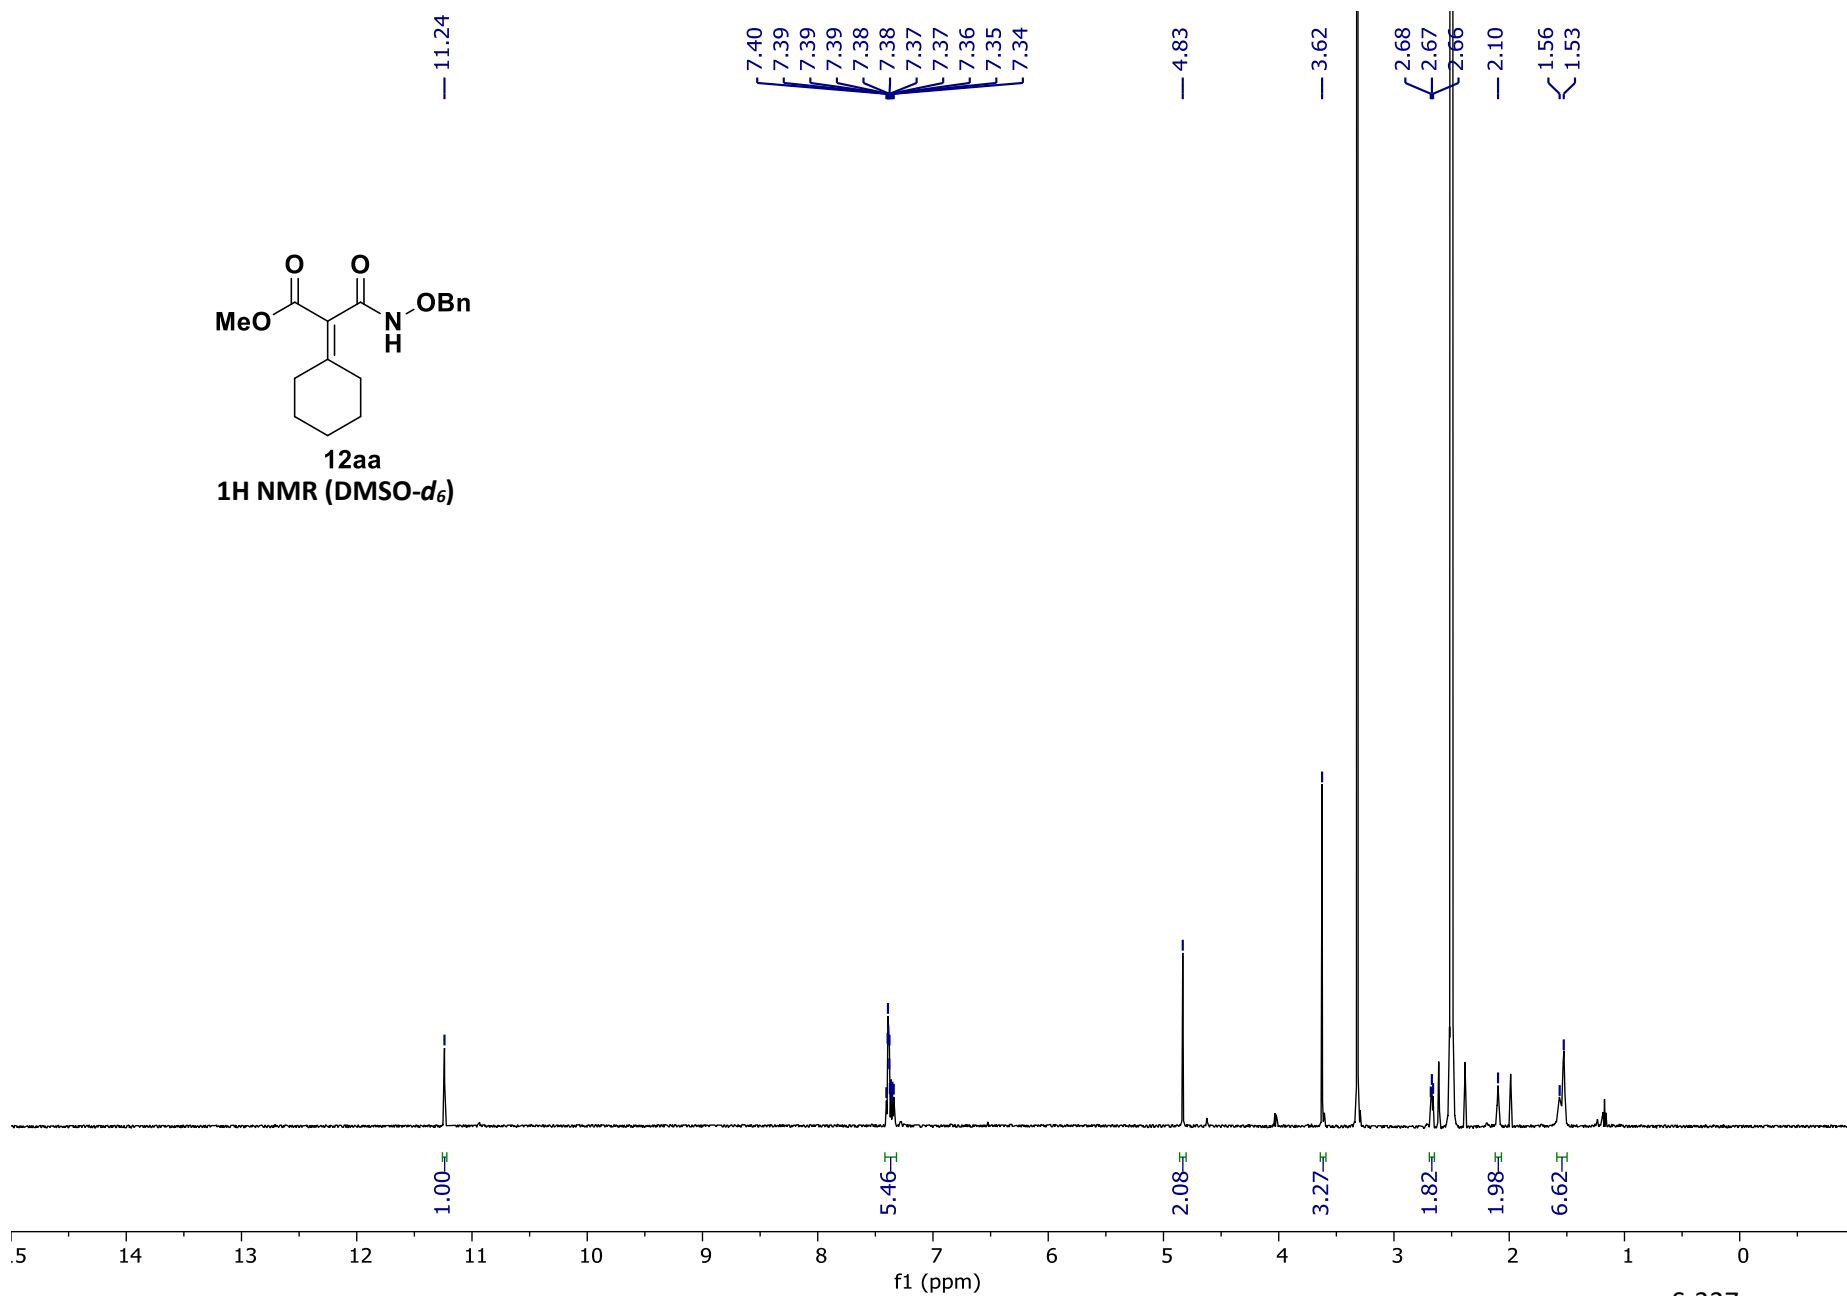

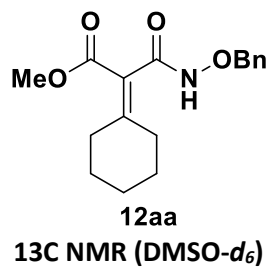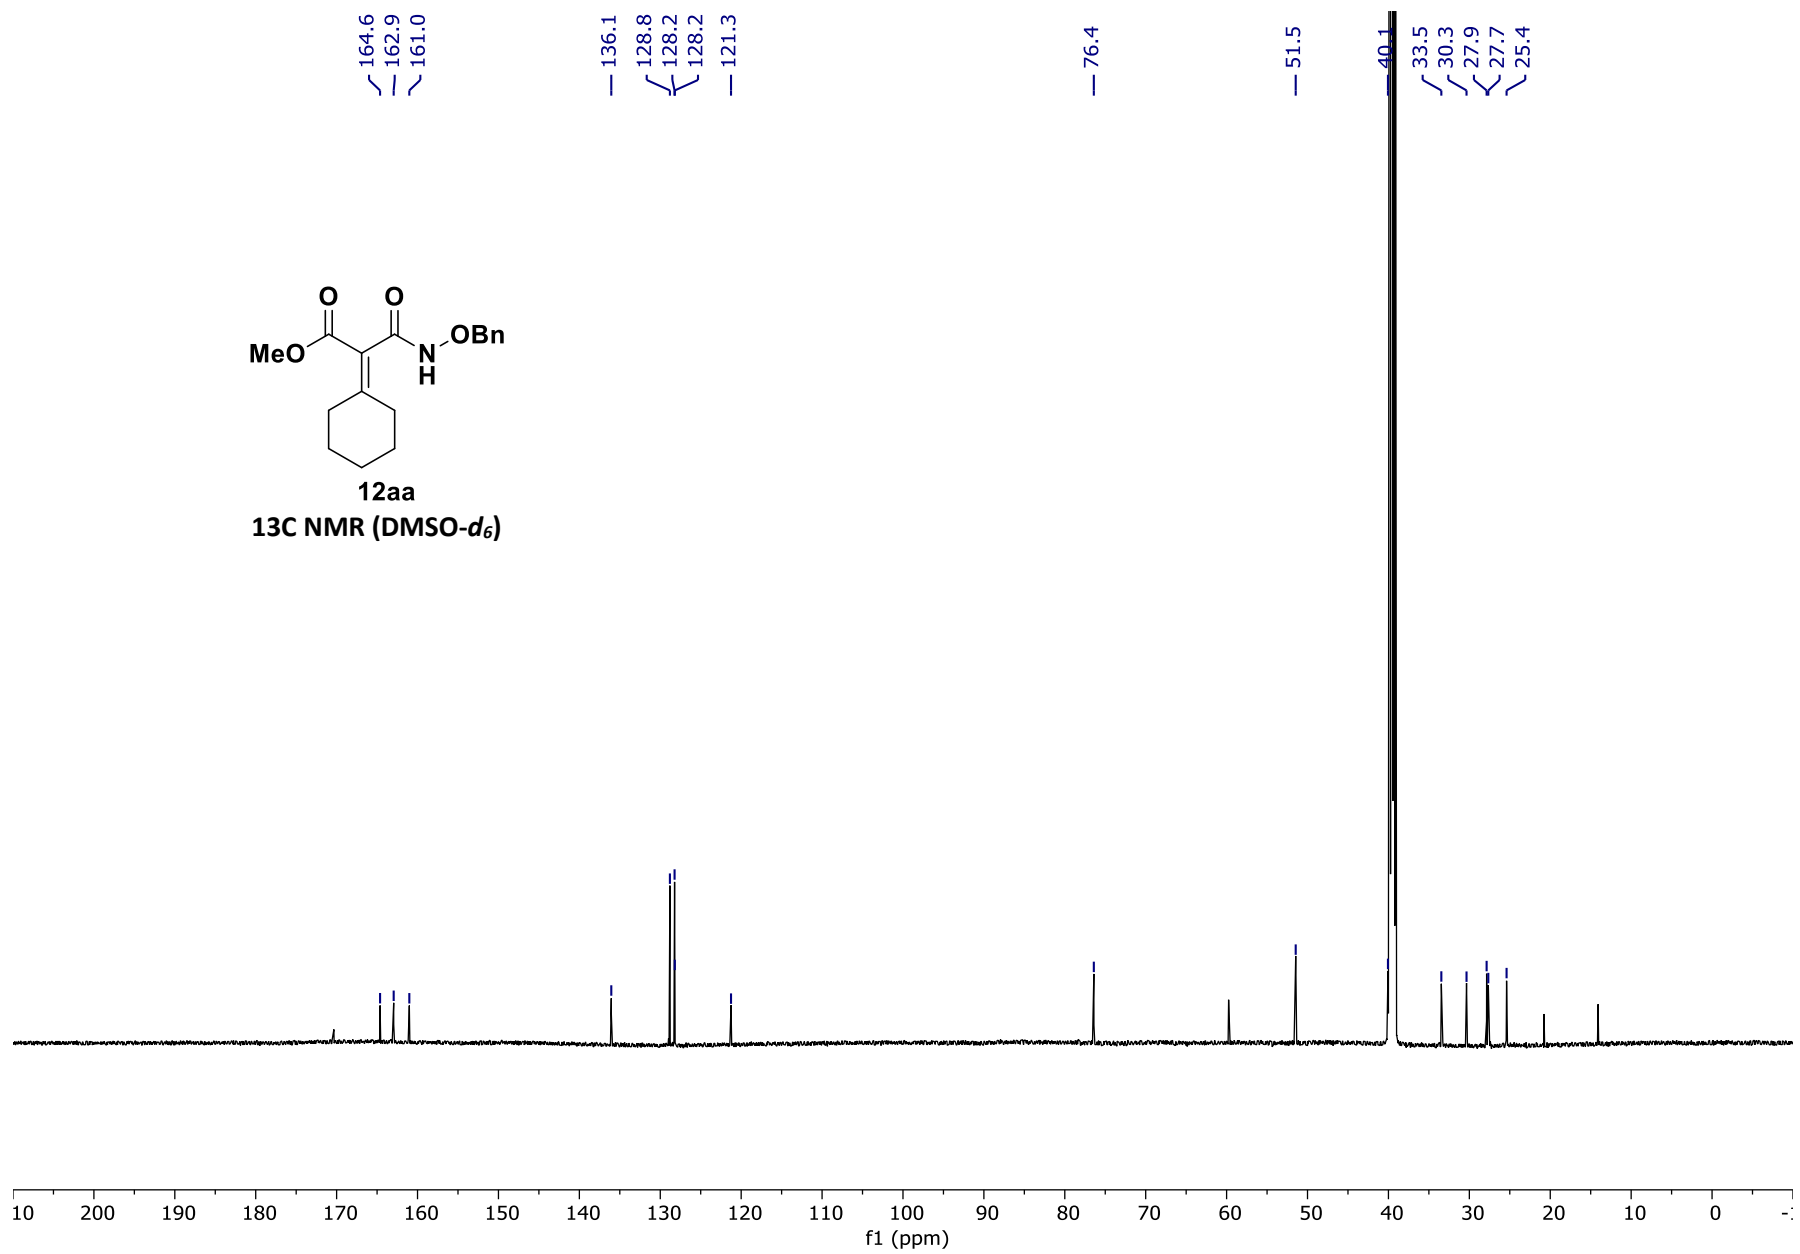

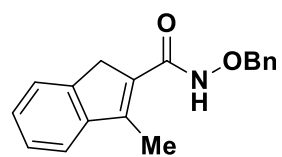

**12ab**  
**<sup>1</sup>H NMR (CDCl<sub>3</sub>)**

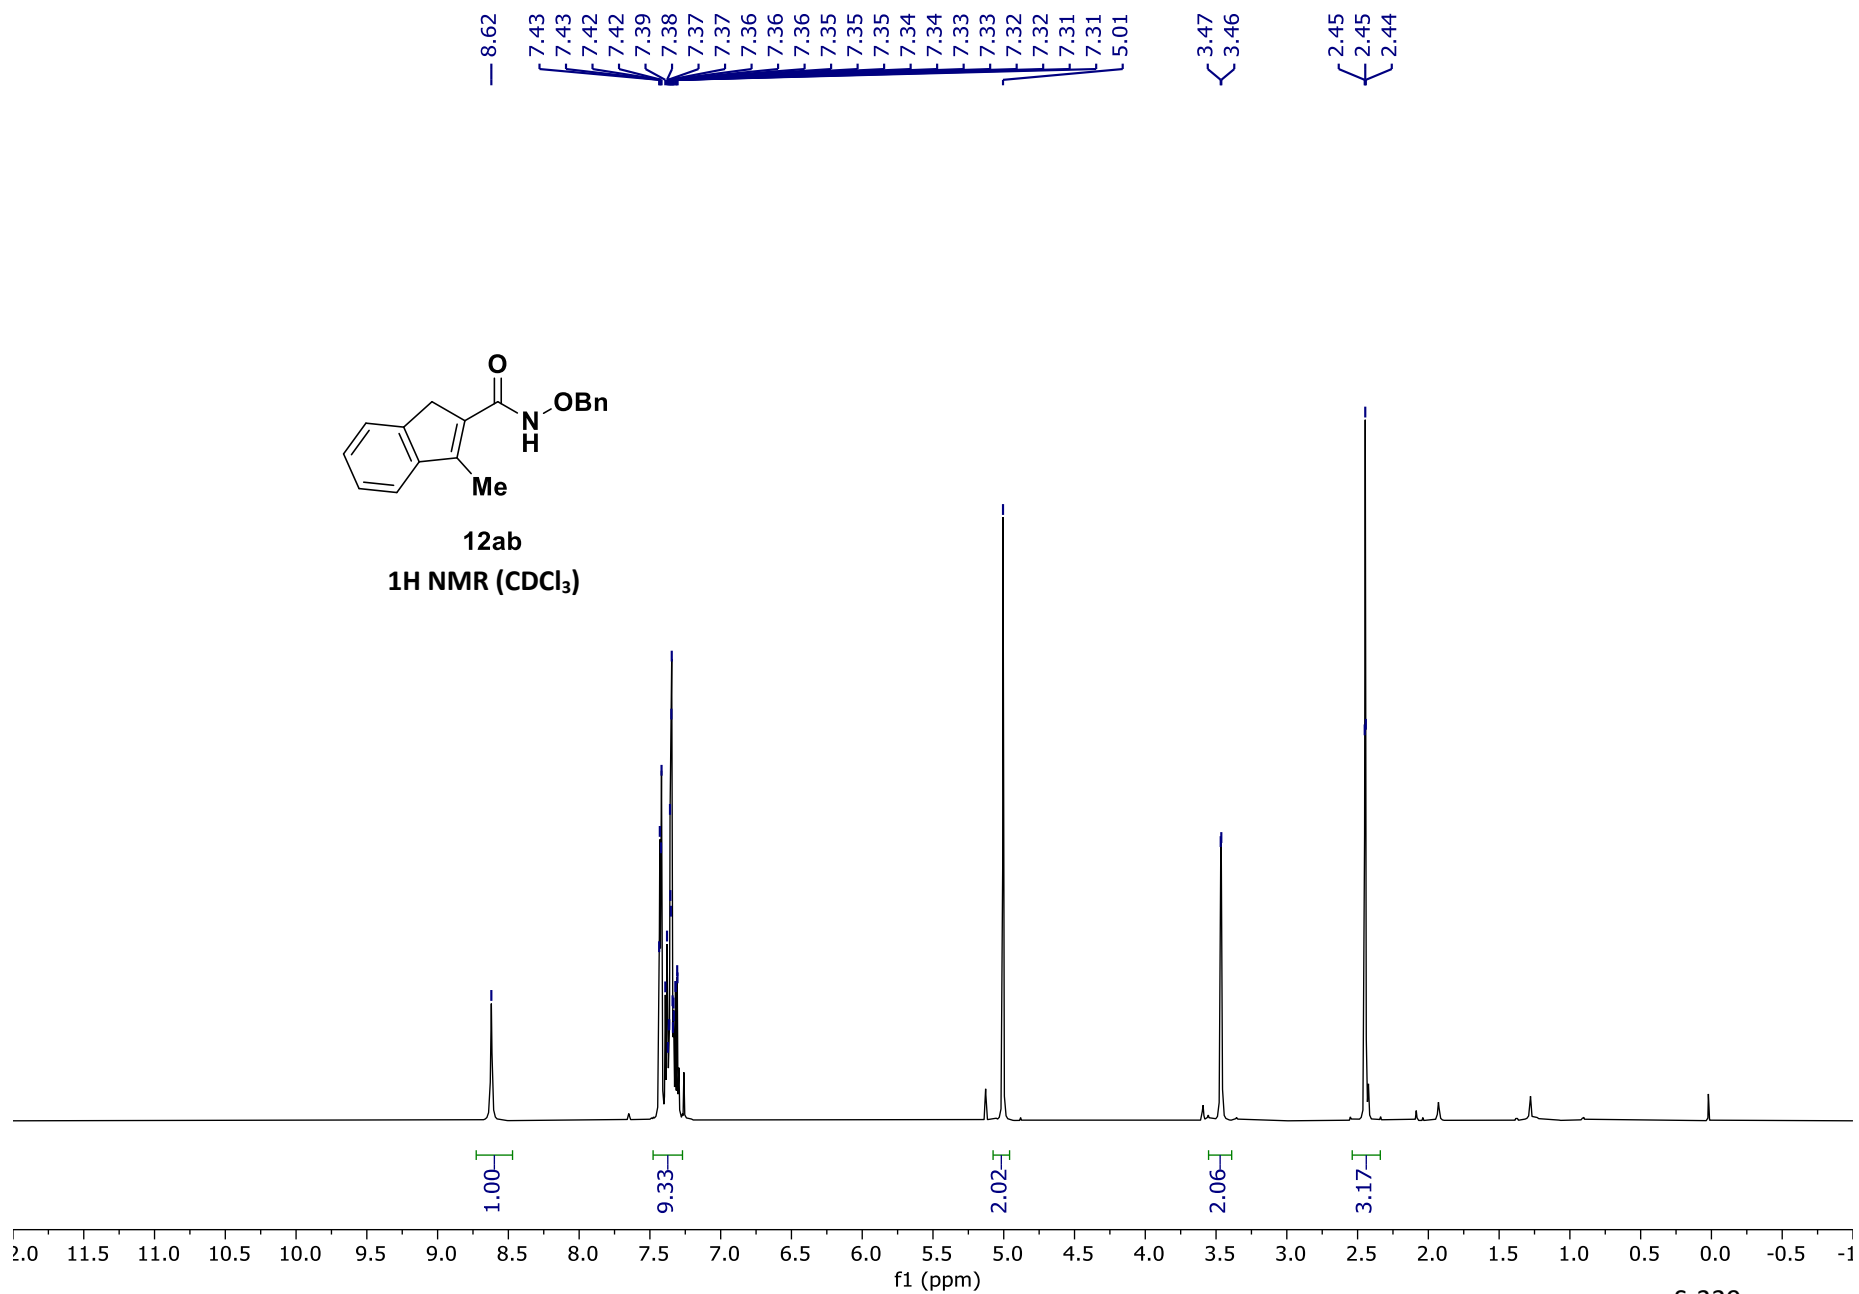

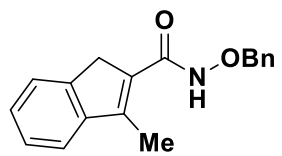

**12ab**  
**<sup>13</sup>C NMR (CDCl<sub>3</sub>)**

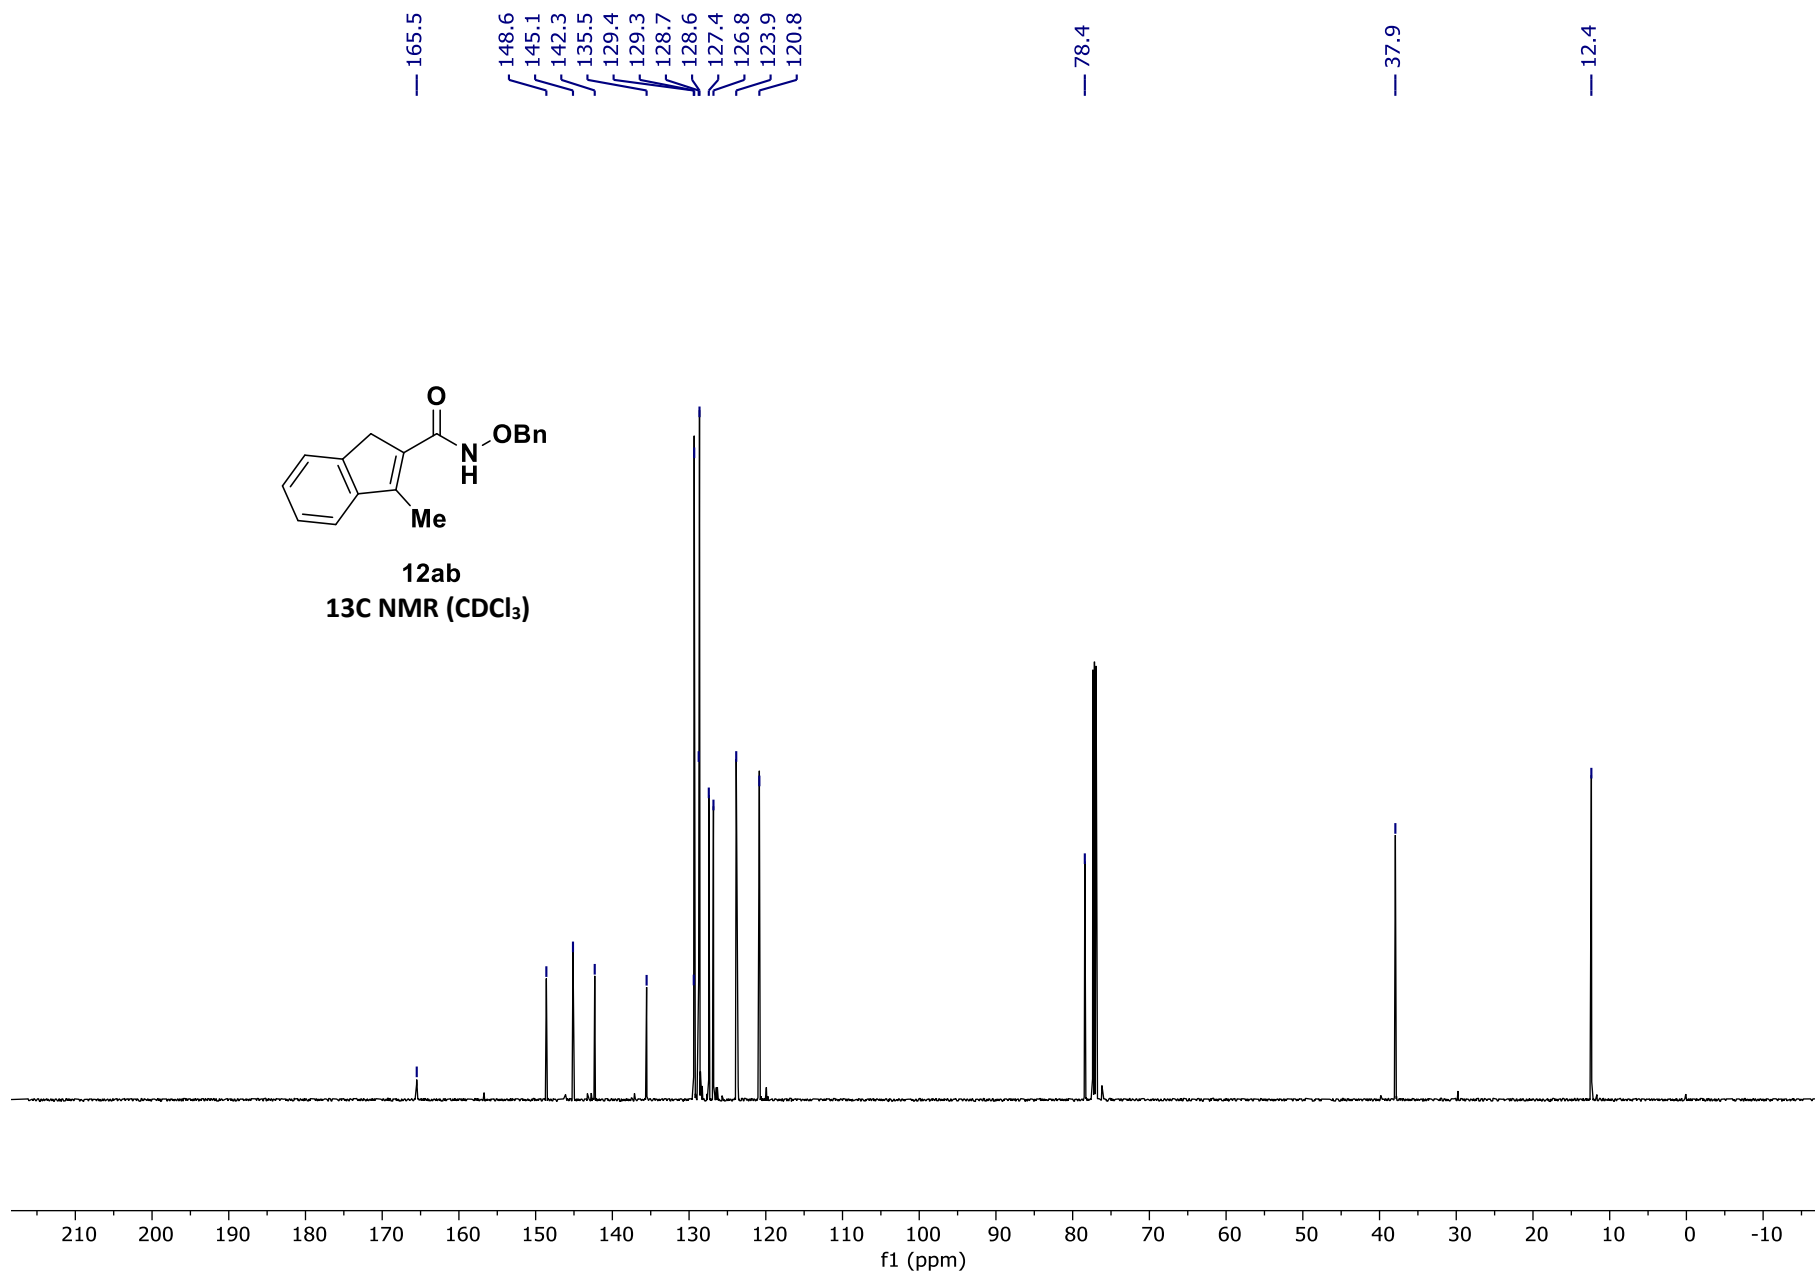



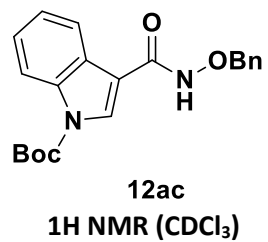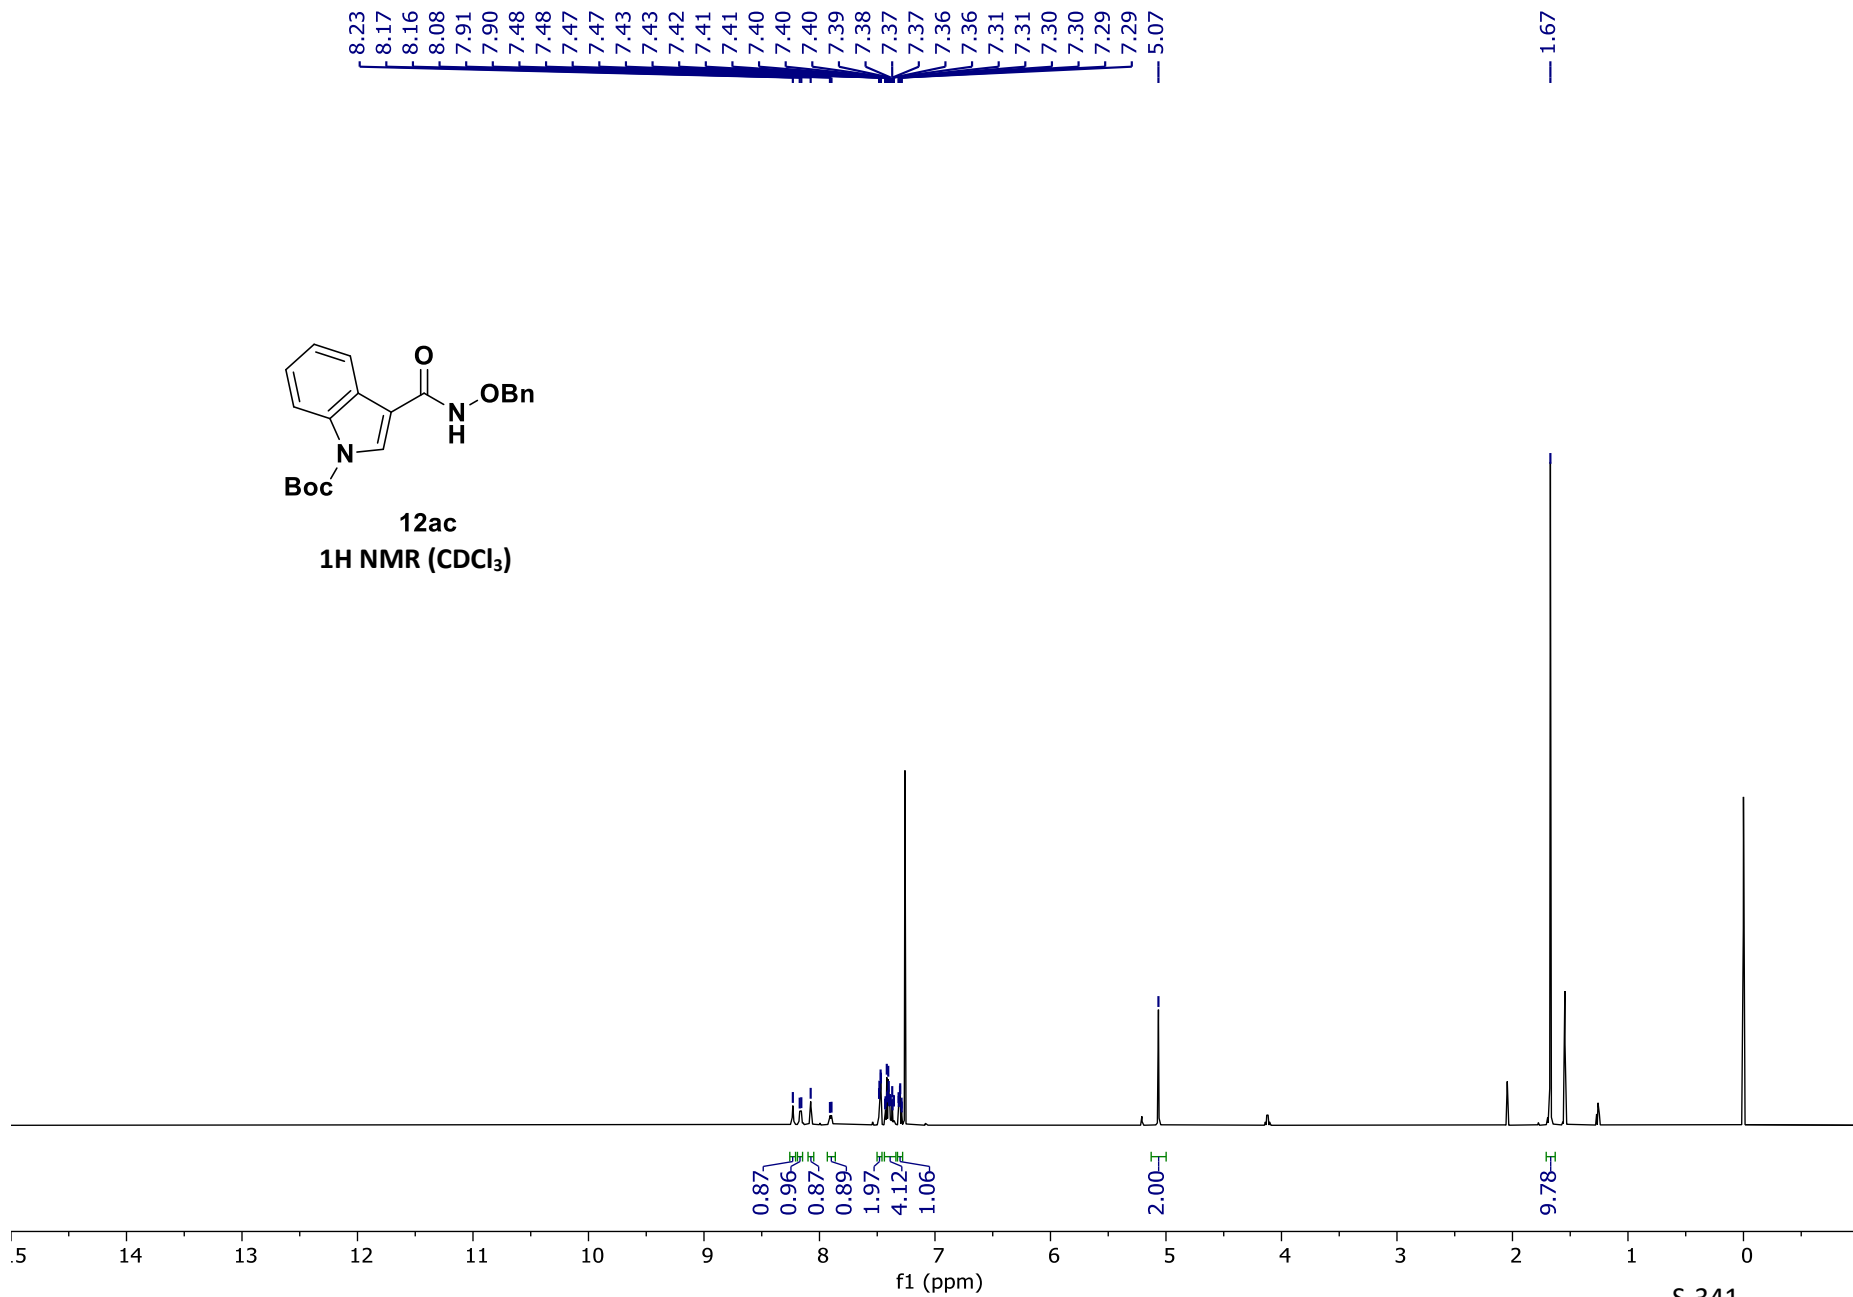

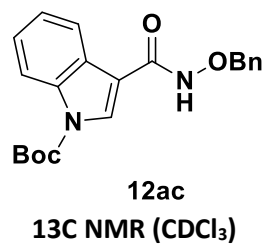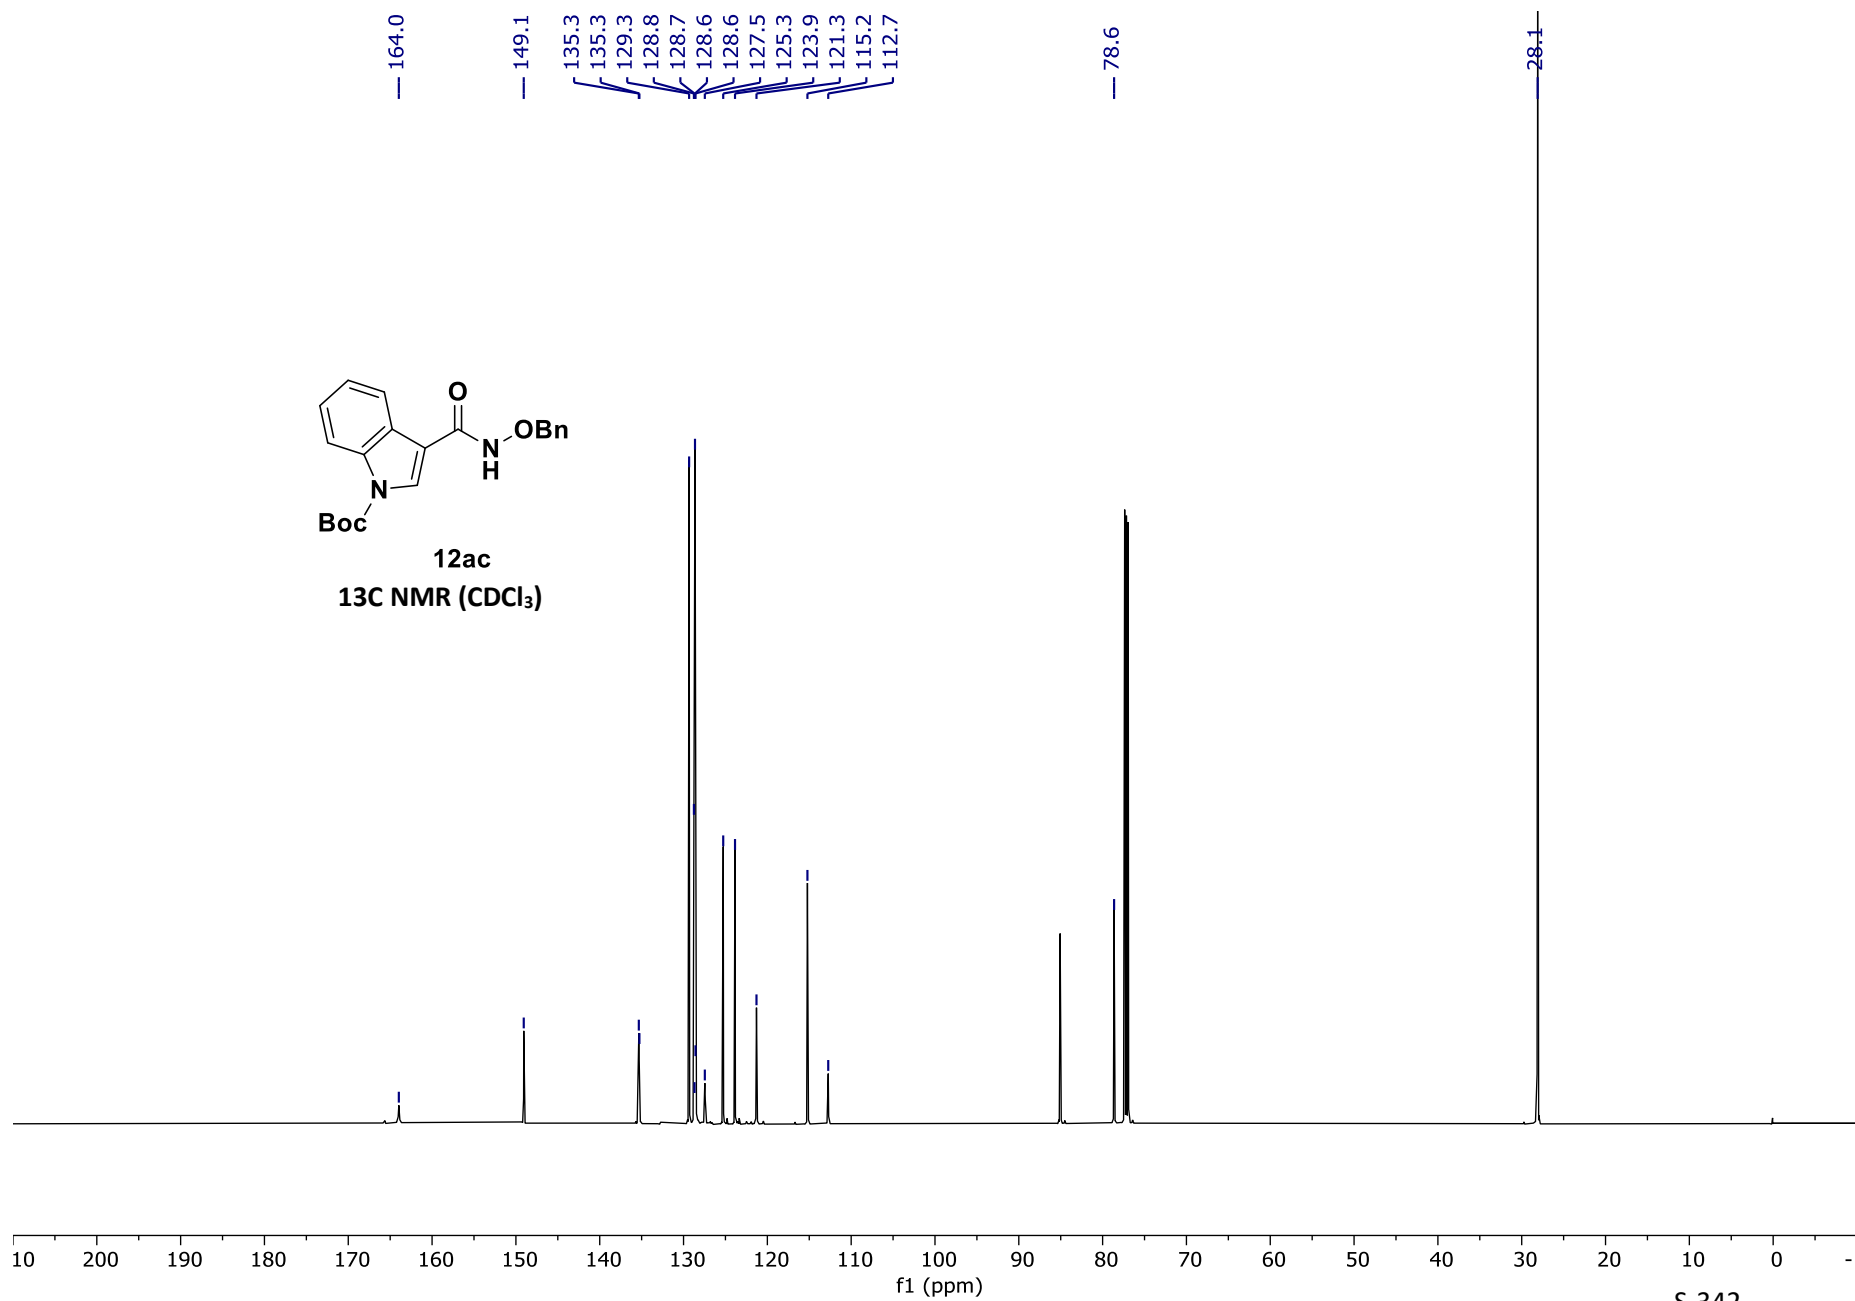

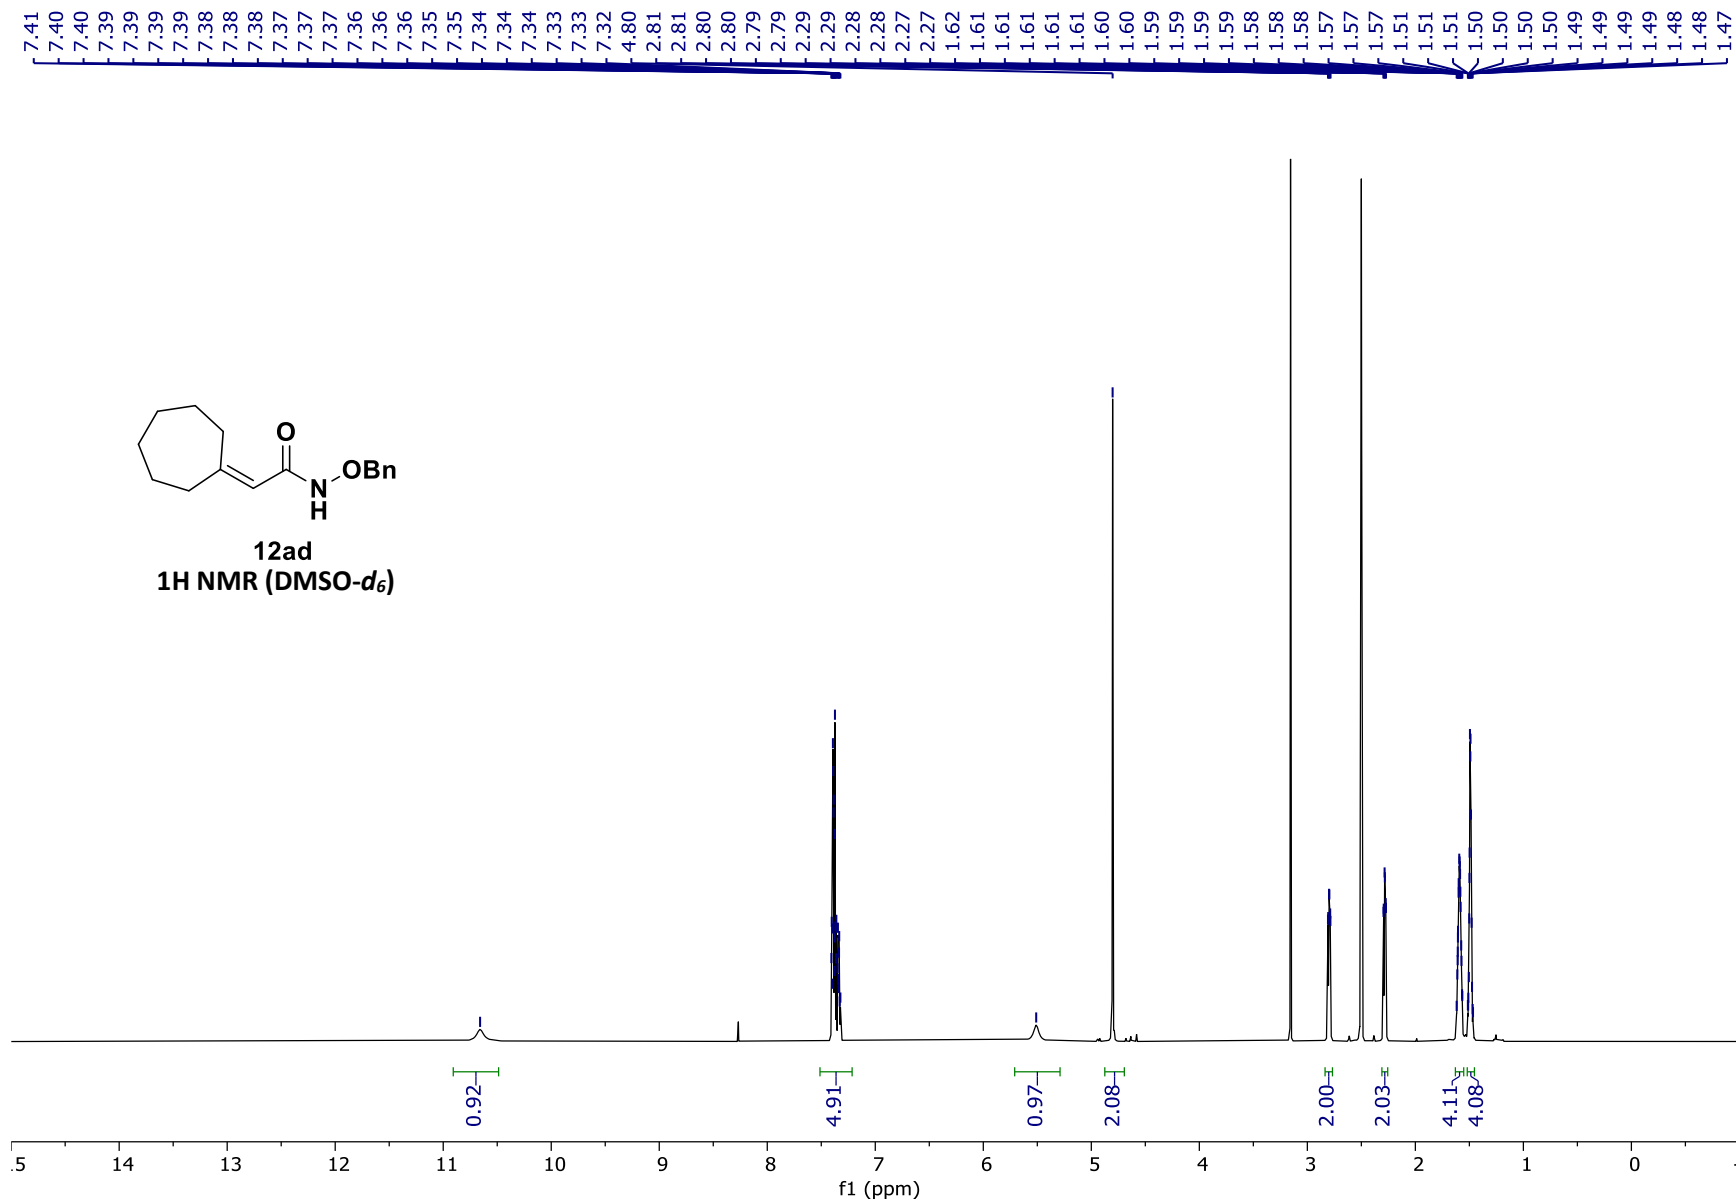

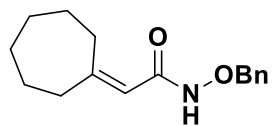

12ad  
13C NMR (DMSO-*d*<sub>6</sub>)

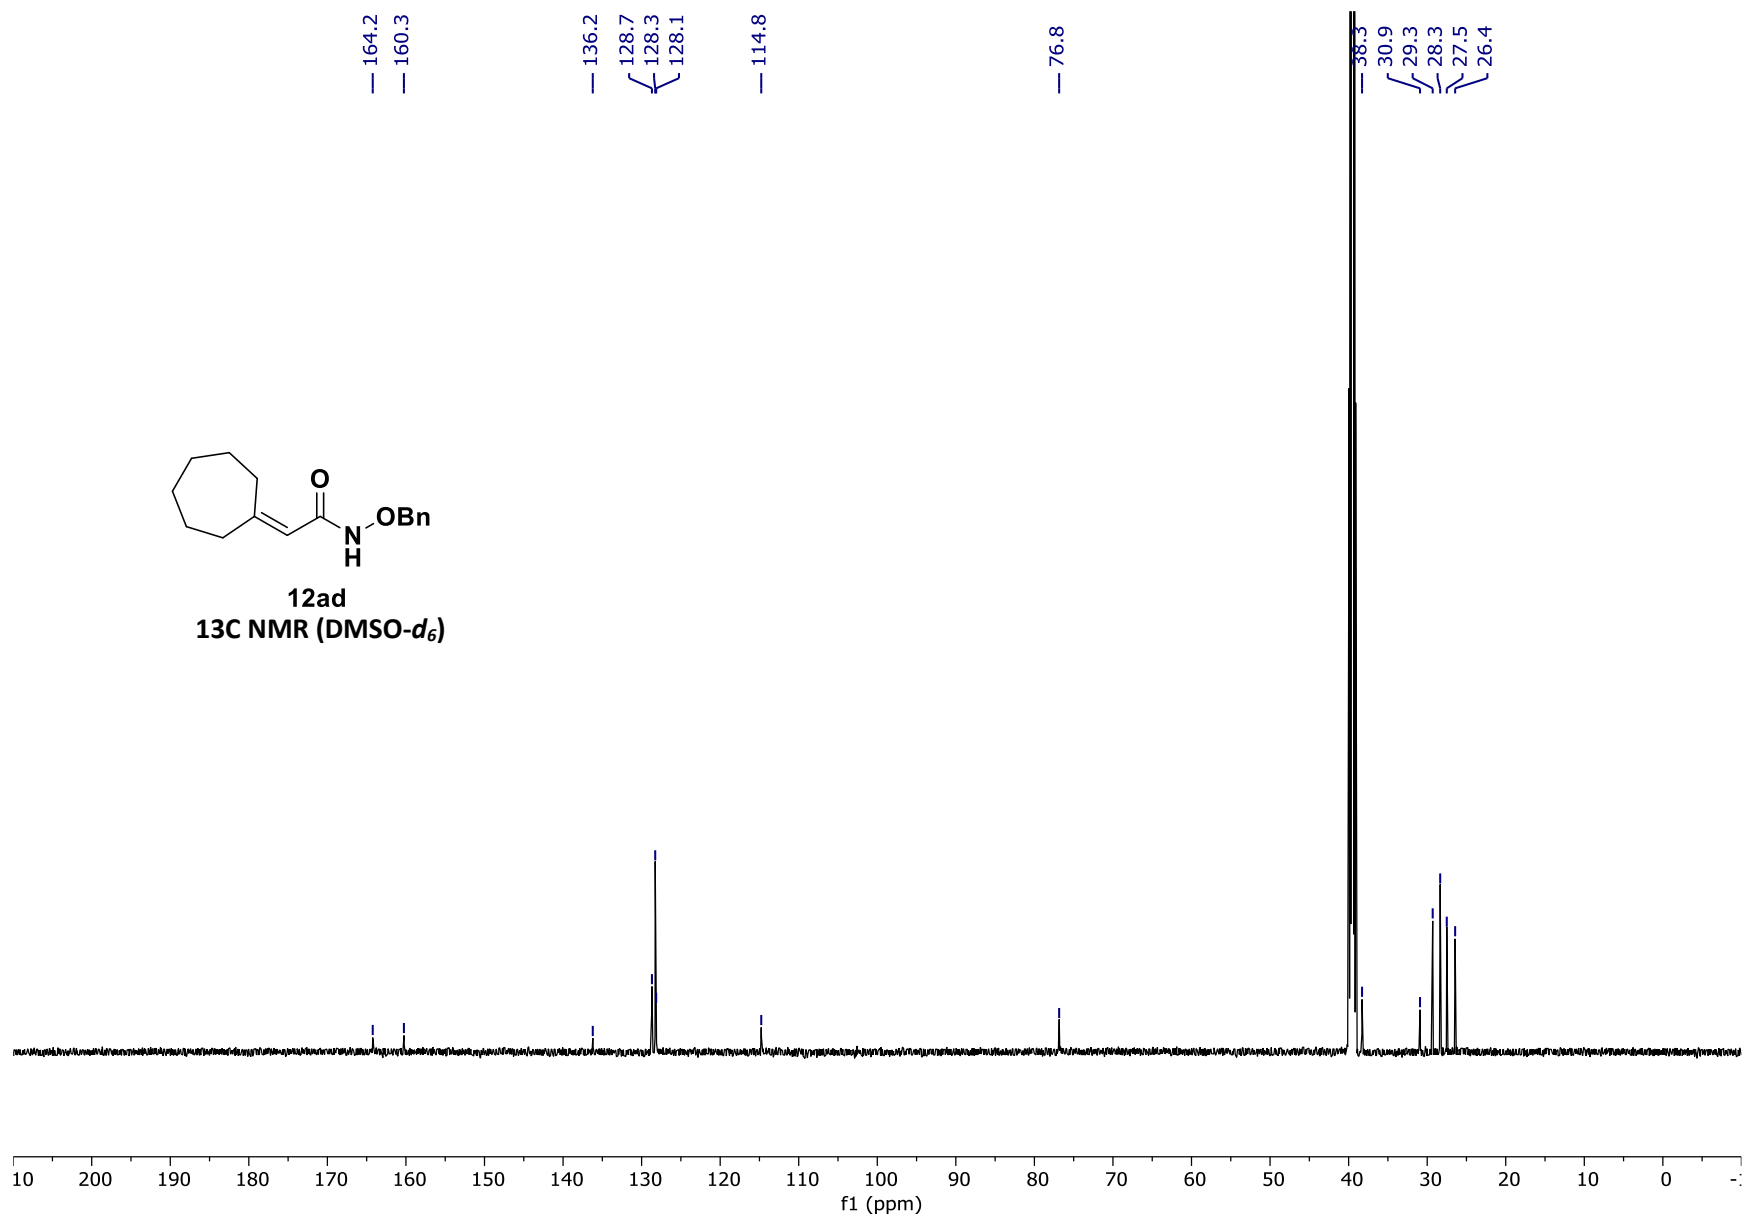

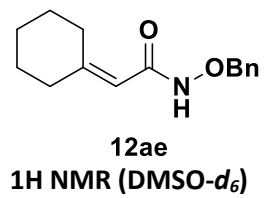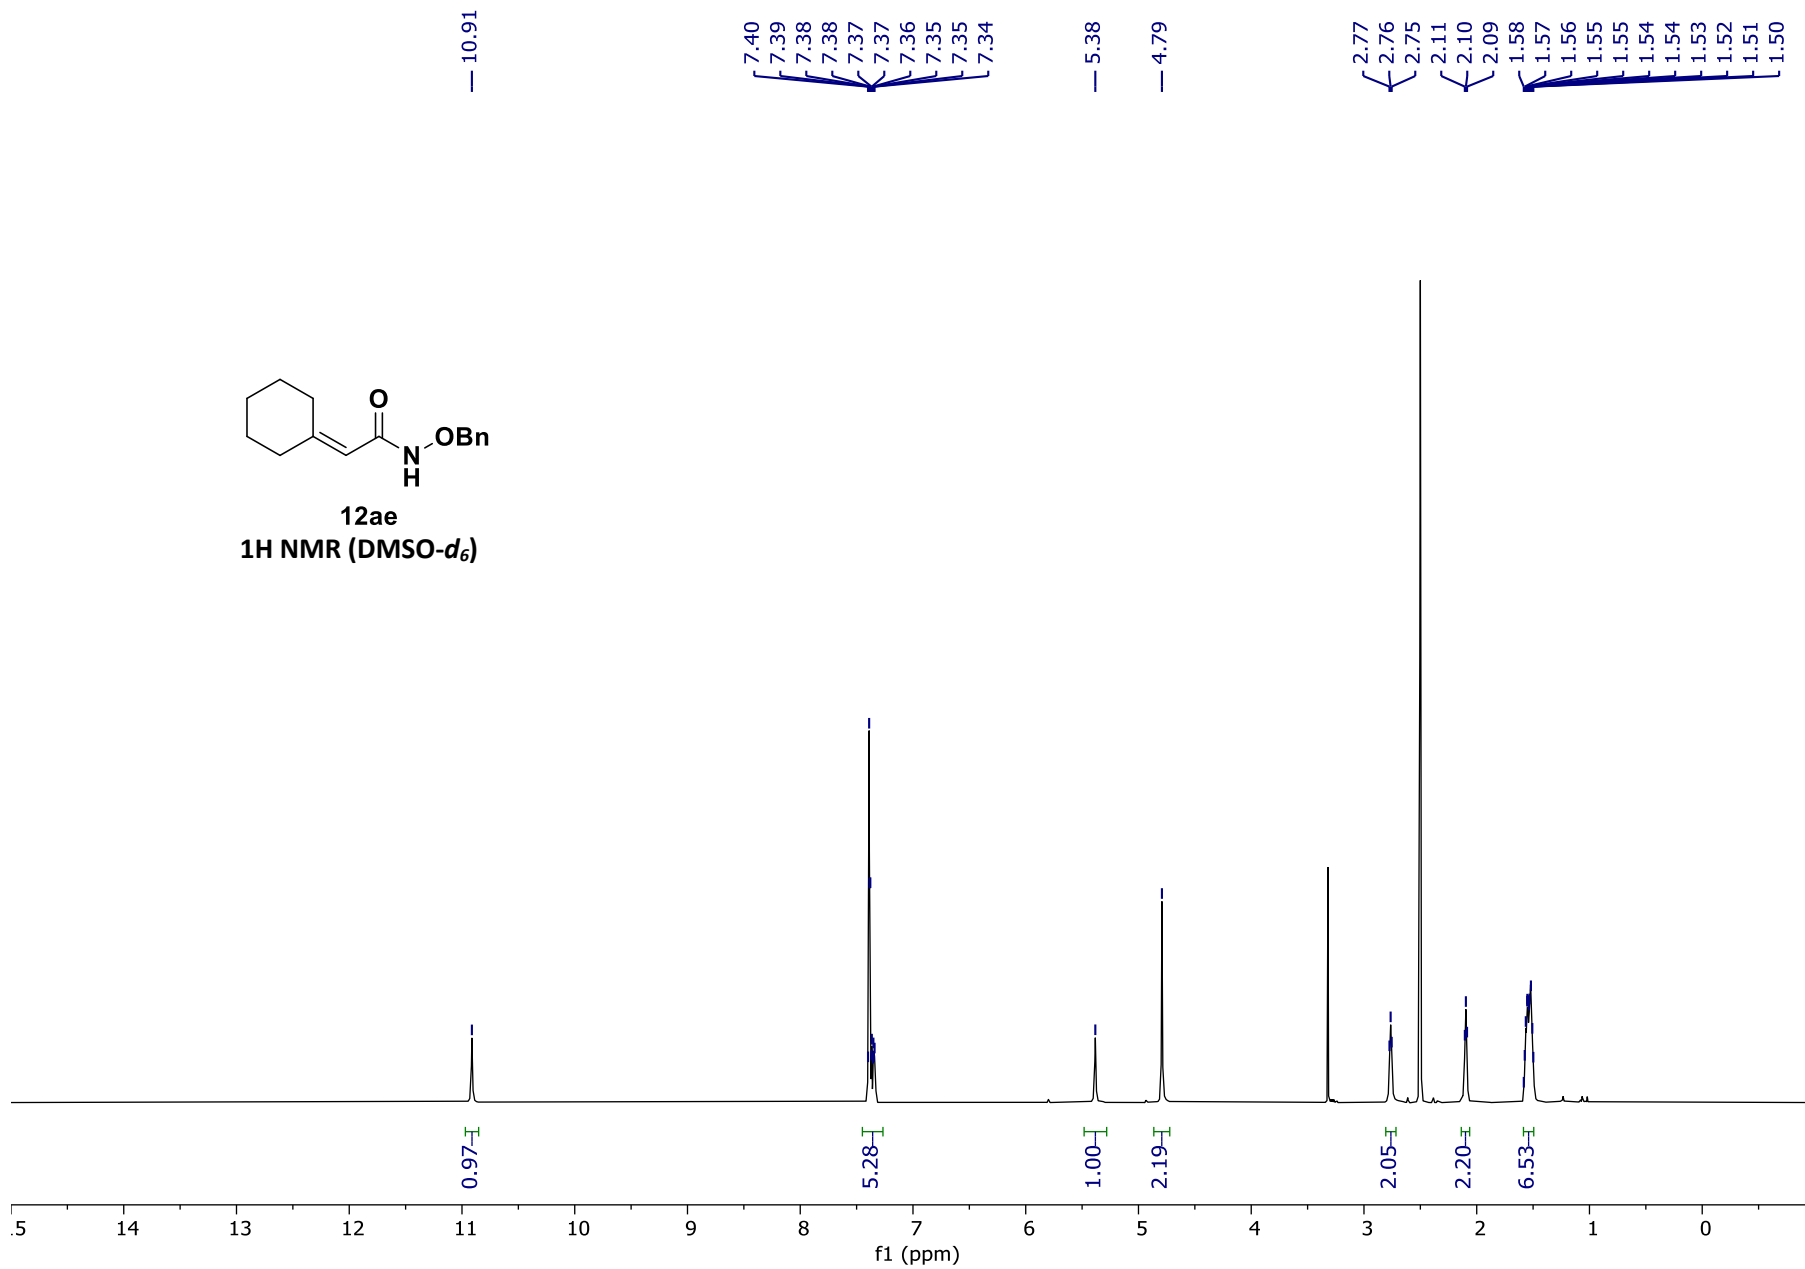

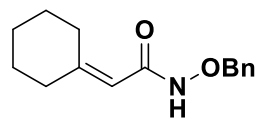

12ae

$^{13}\text{C}$  NMR ( $\text{DMSO-}d_6$ )

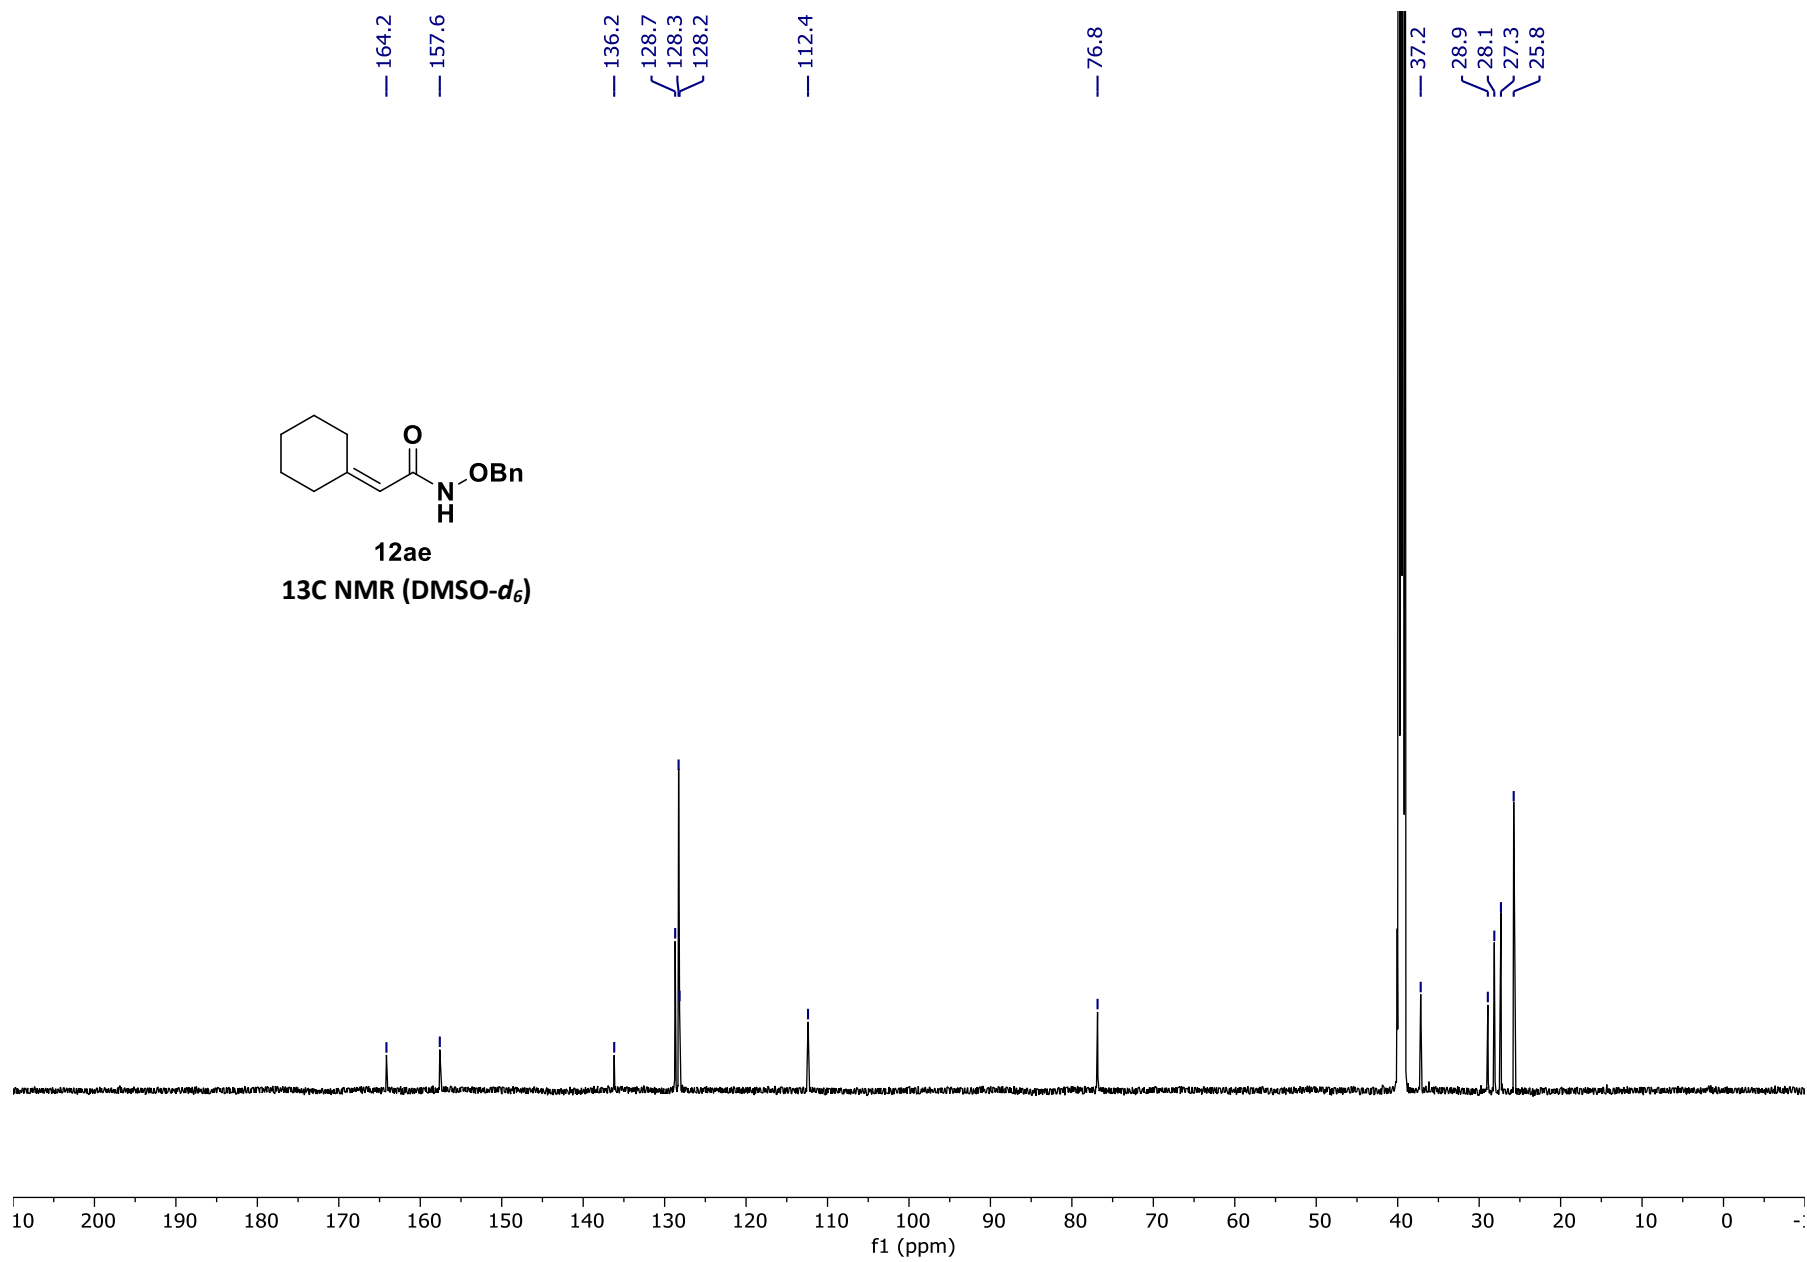

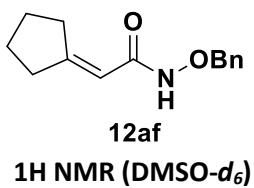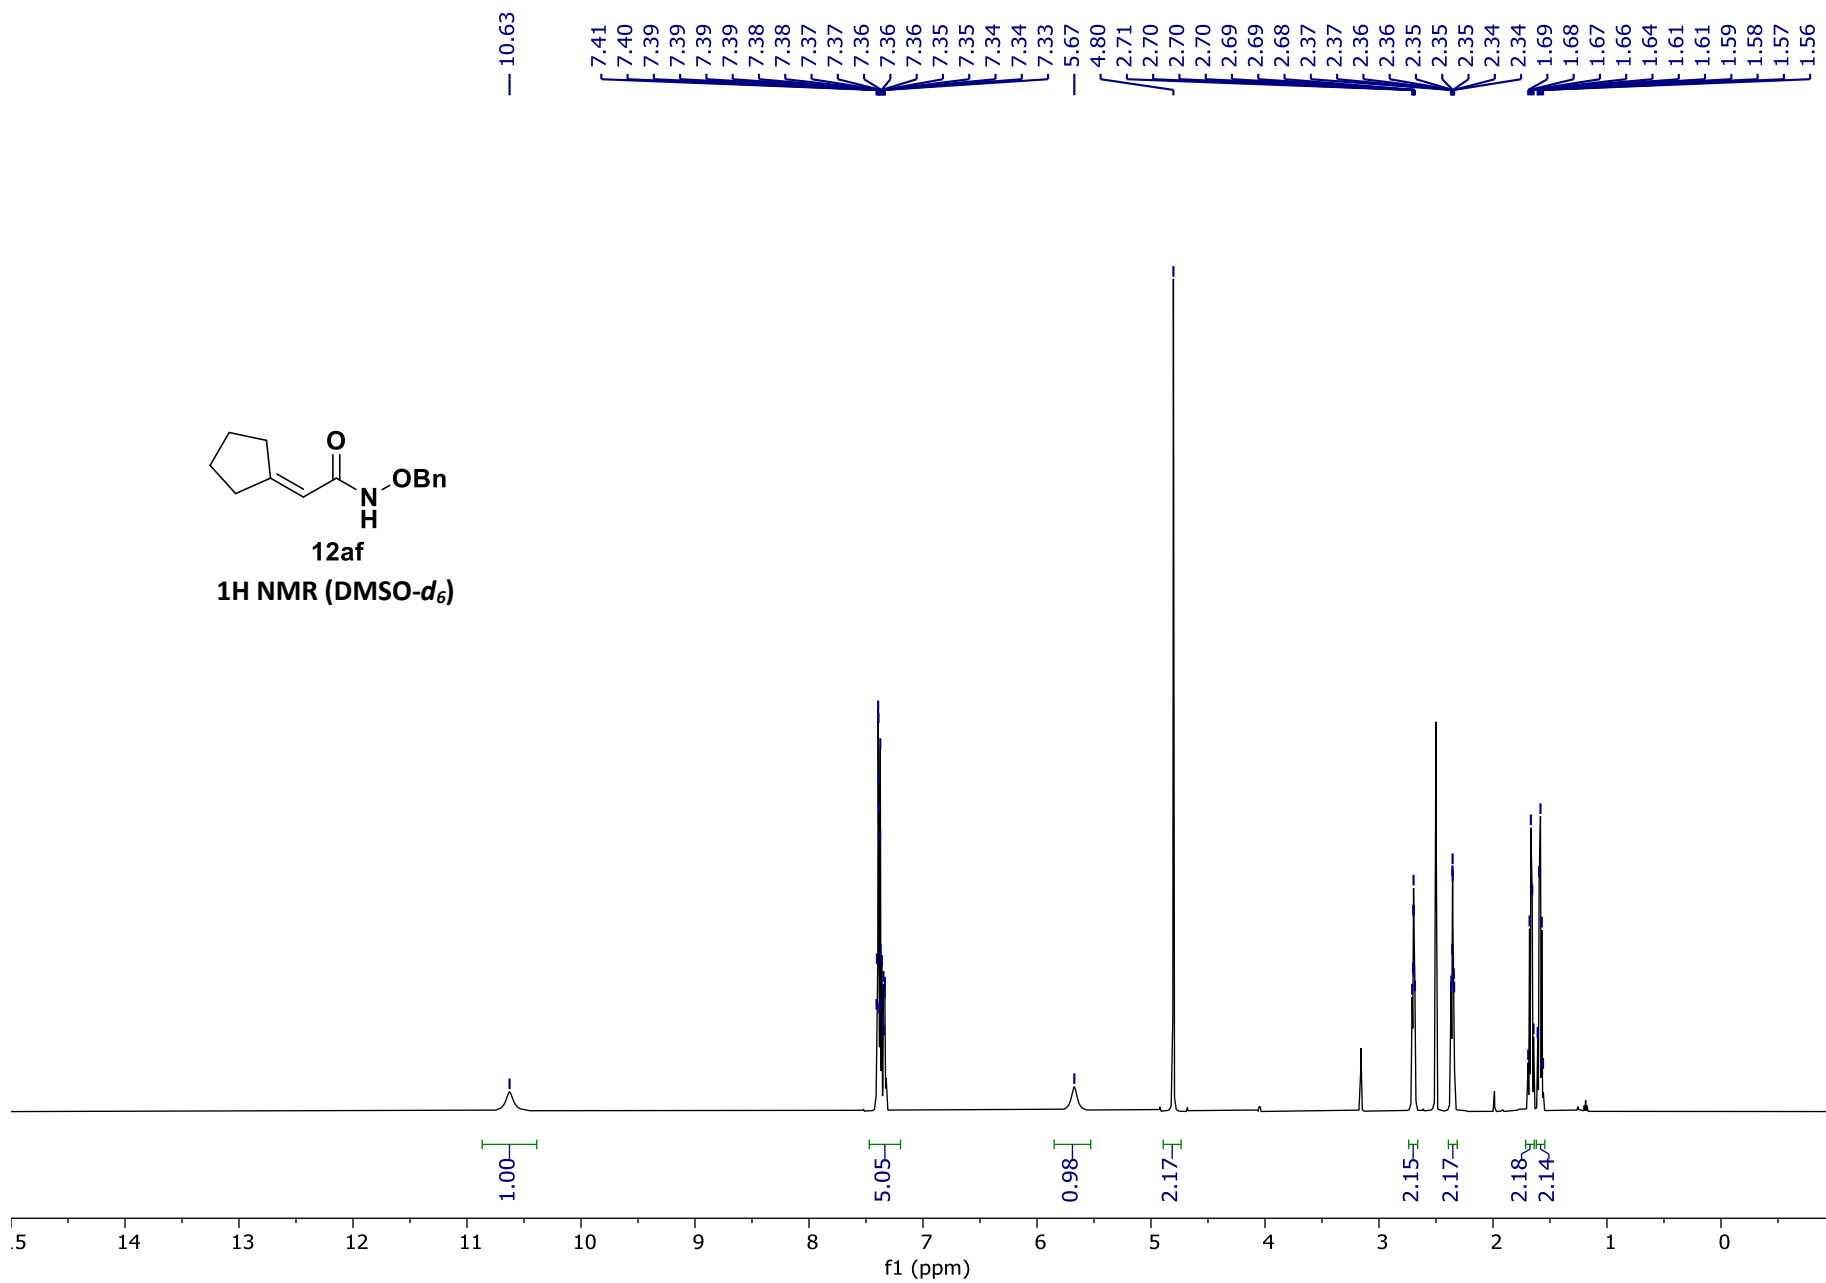

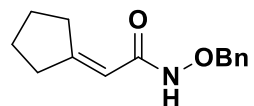

12af

<sup>13</sup>C NMR (DMSO-*d*<sub>6</sub>)

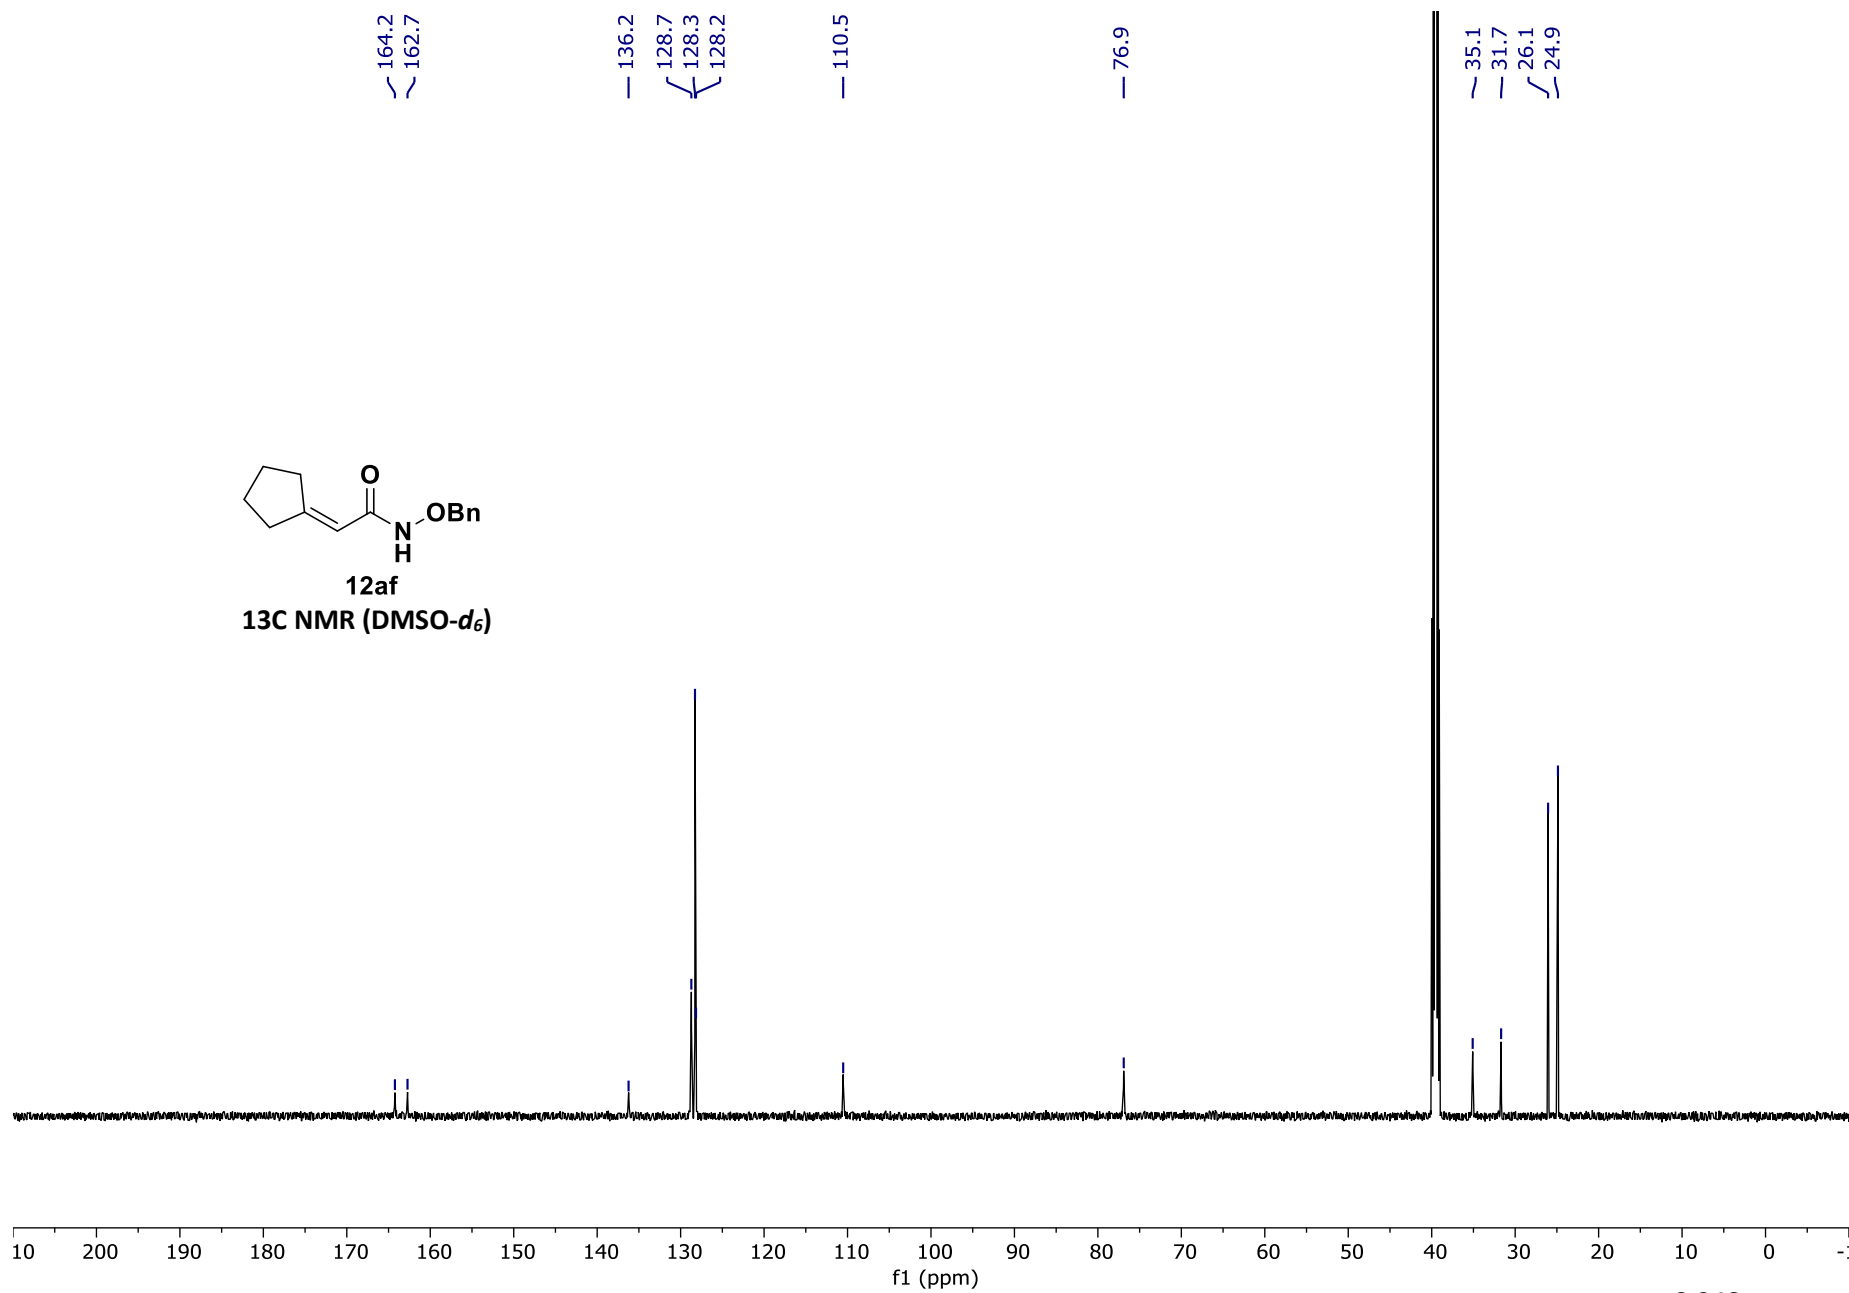



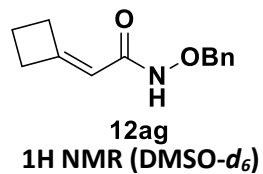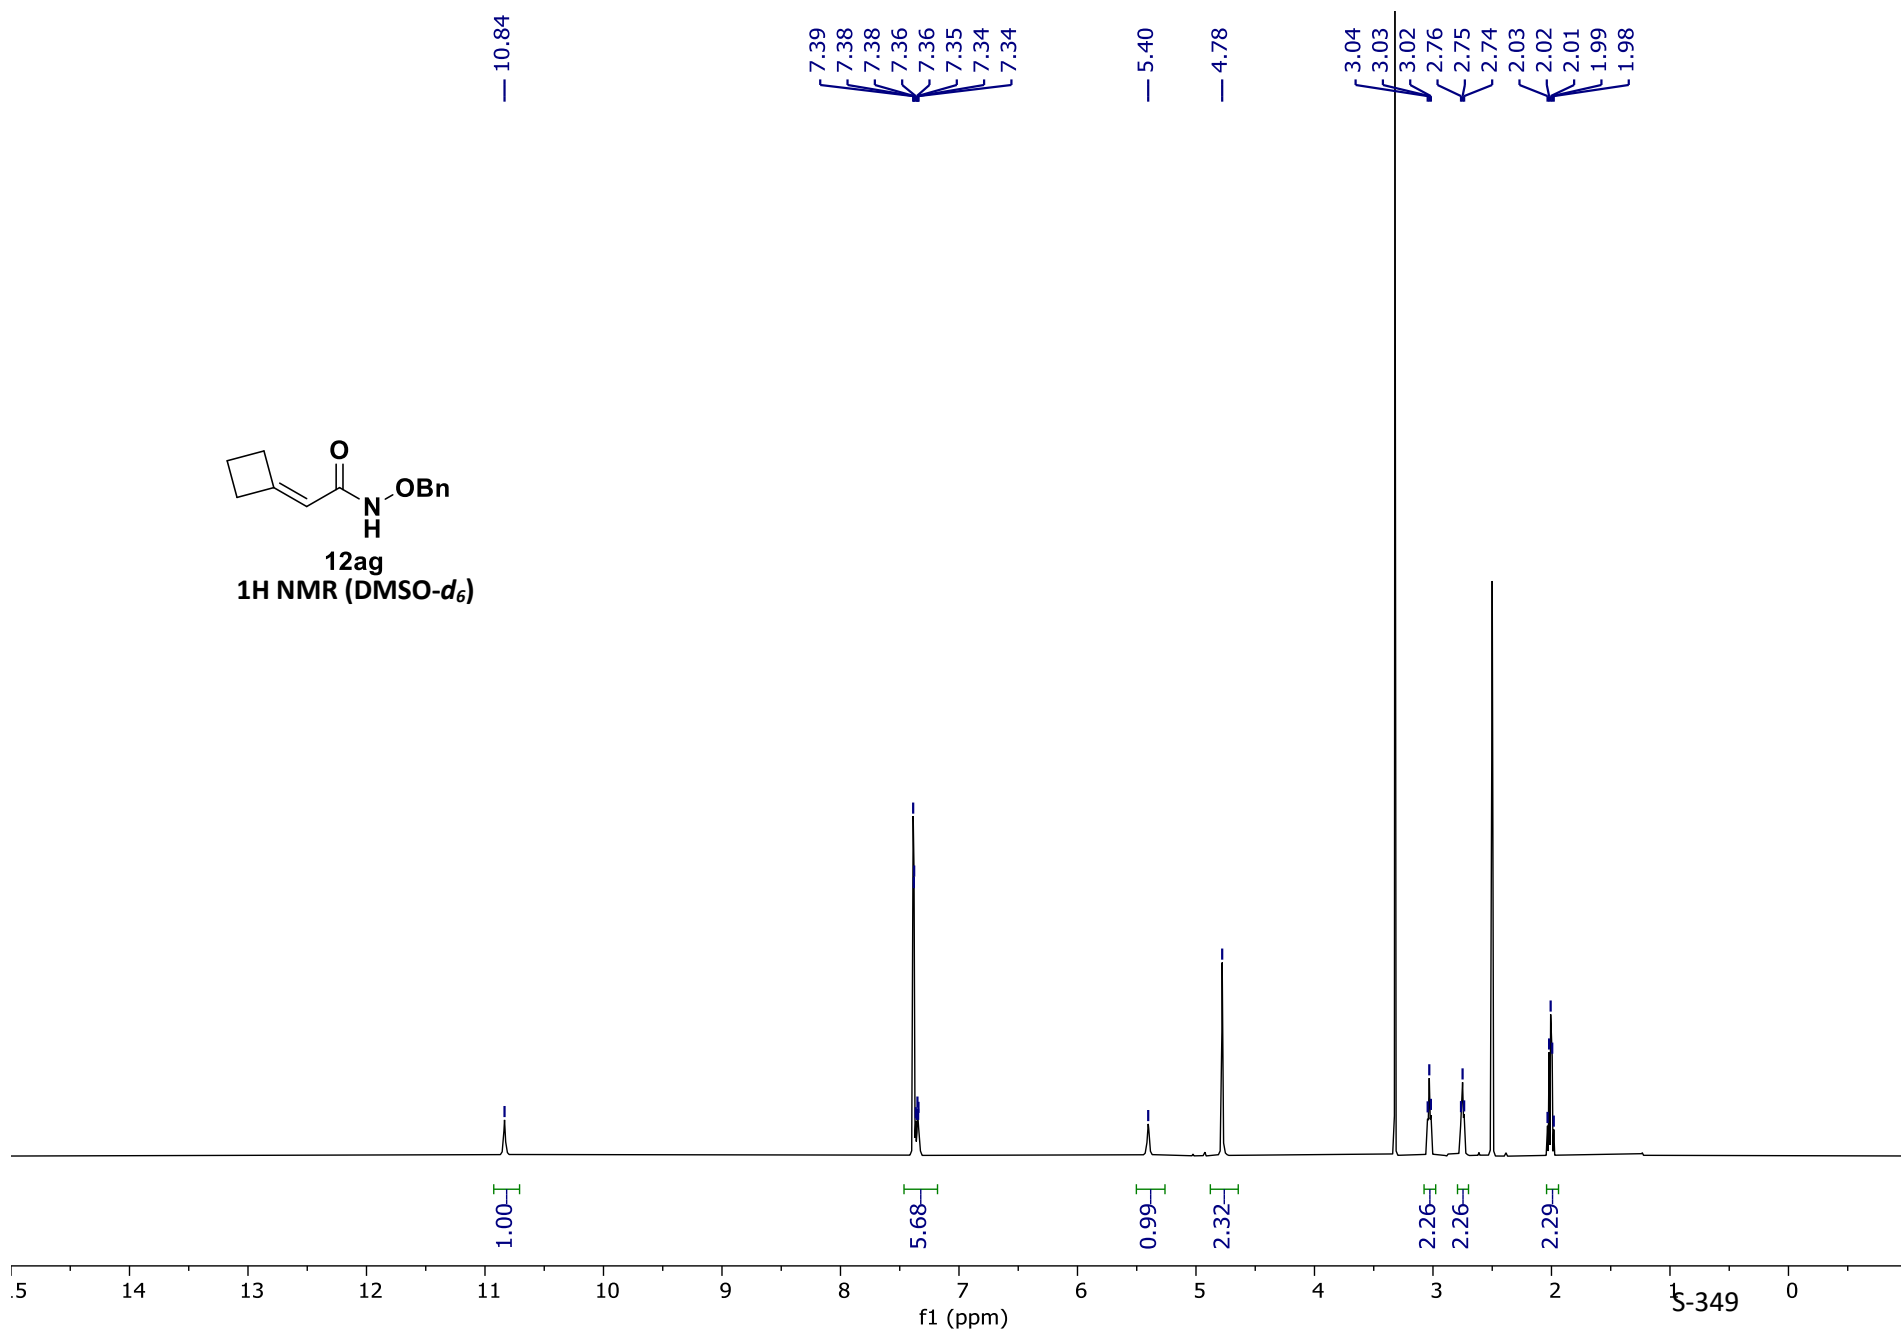

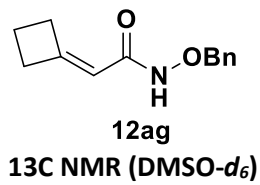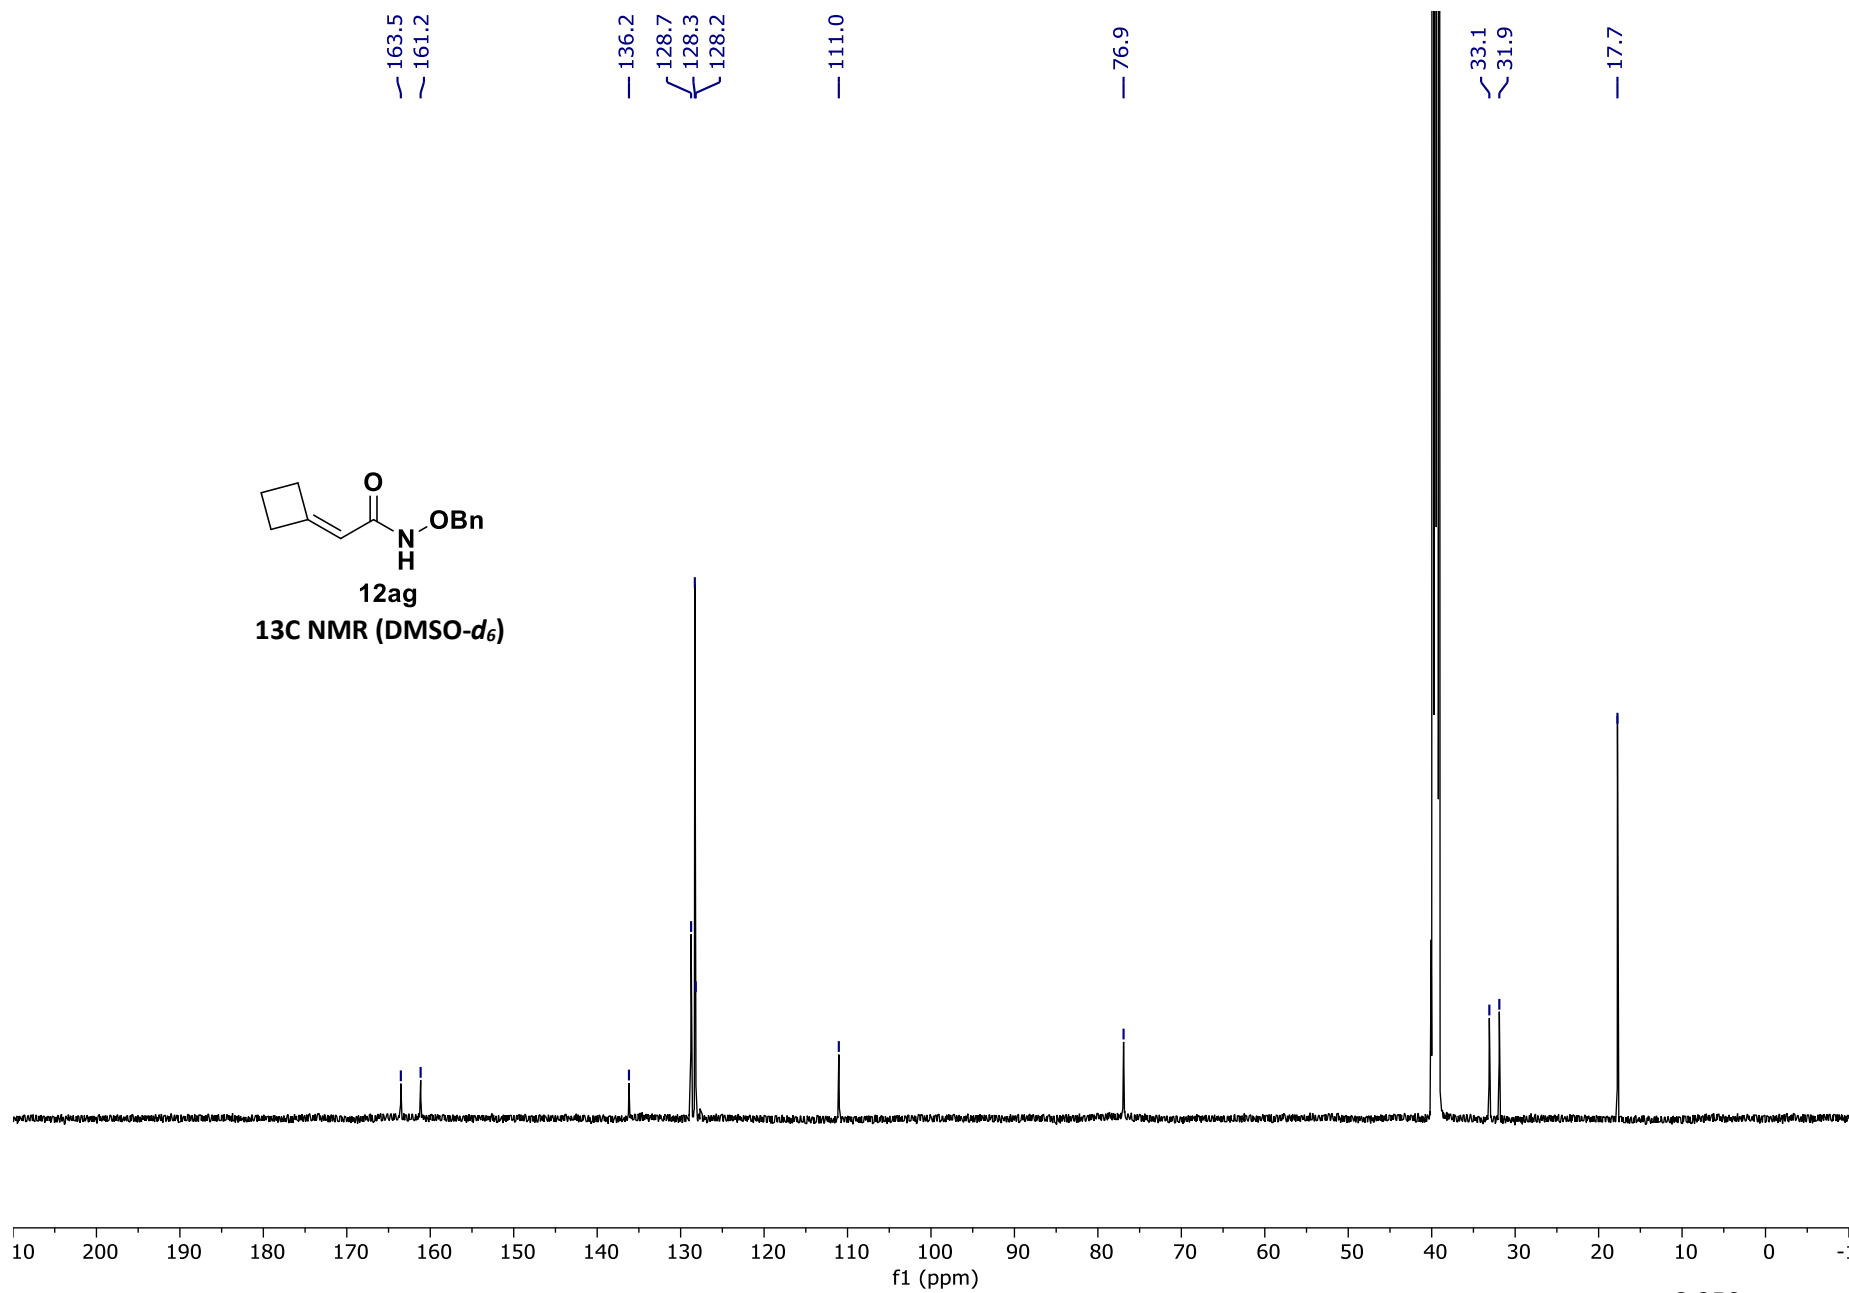

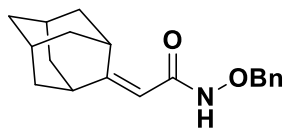

**12ah**  
**<sup>1</sup>H NMR (DMSO-*d*<sub>6</sub>)**

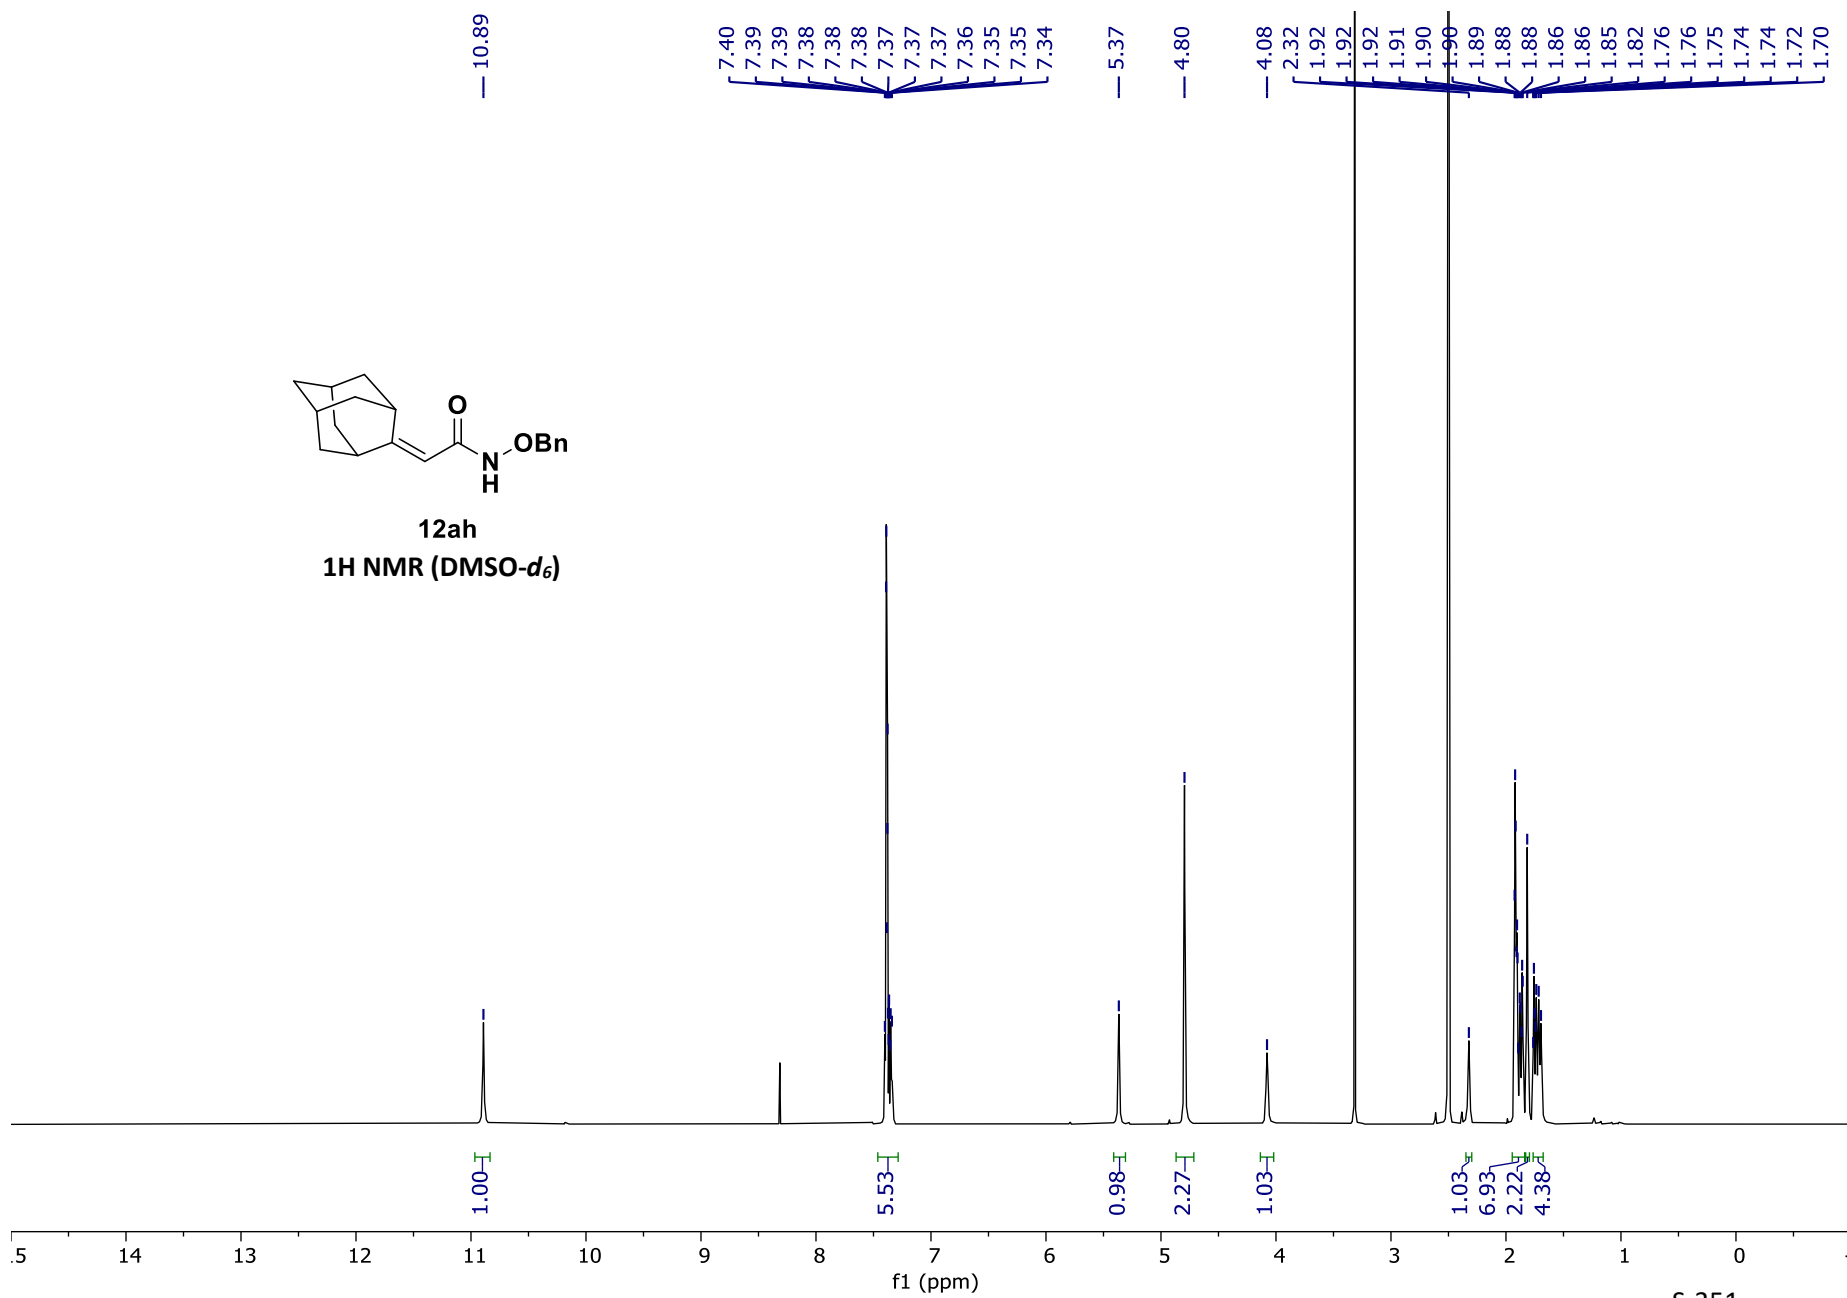

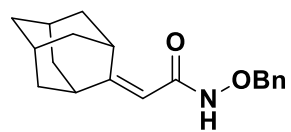

12ah

$^{13}\text{C}$  NMR ( $\text{DMSO-}d_6$ )

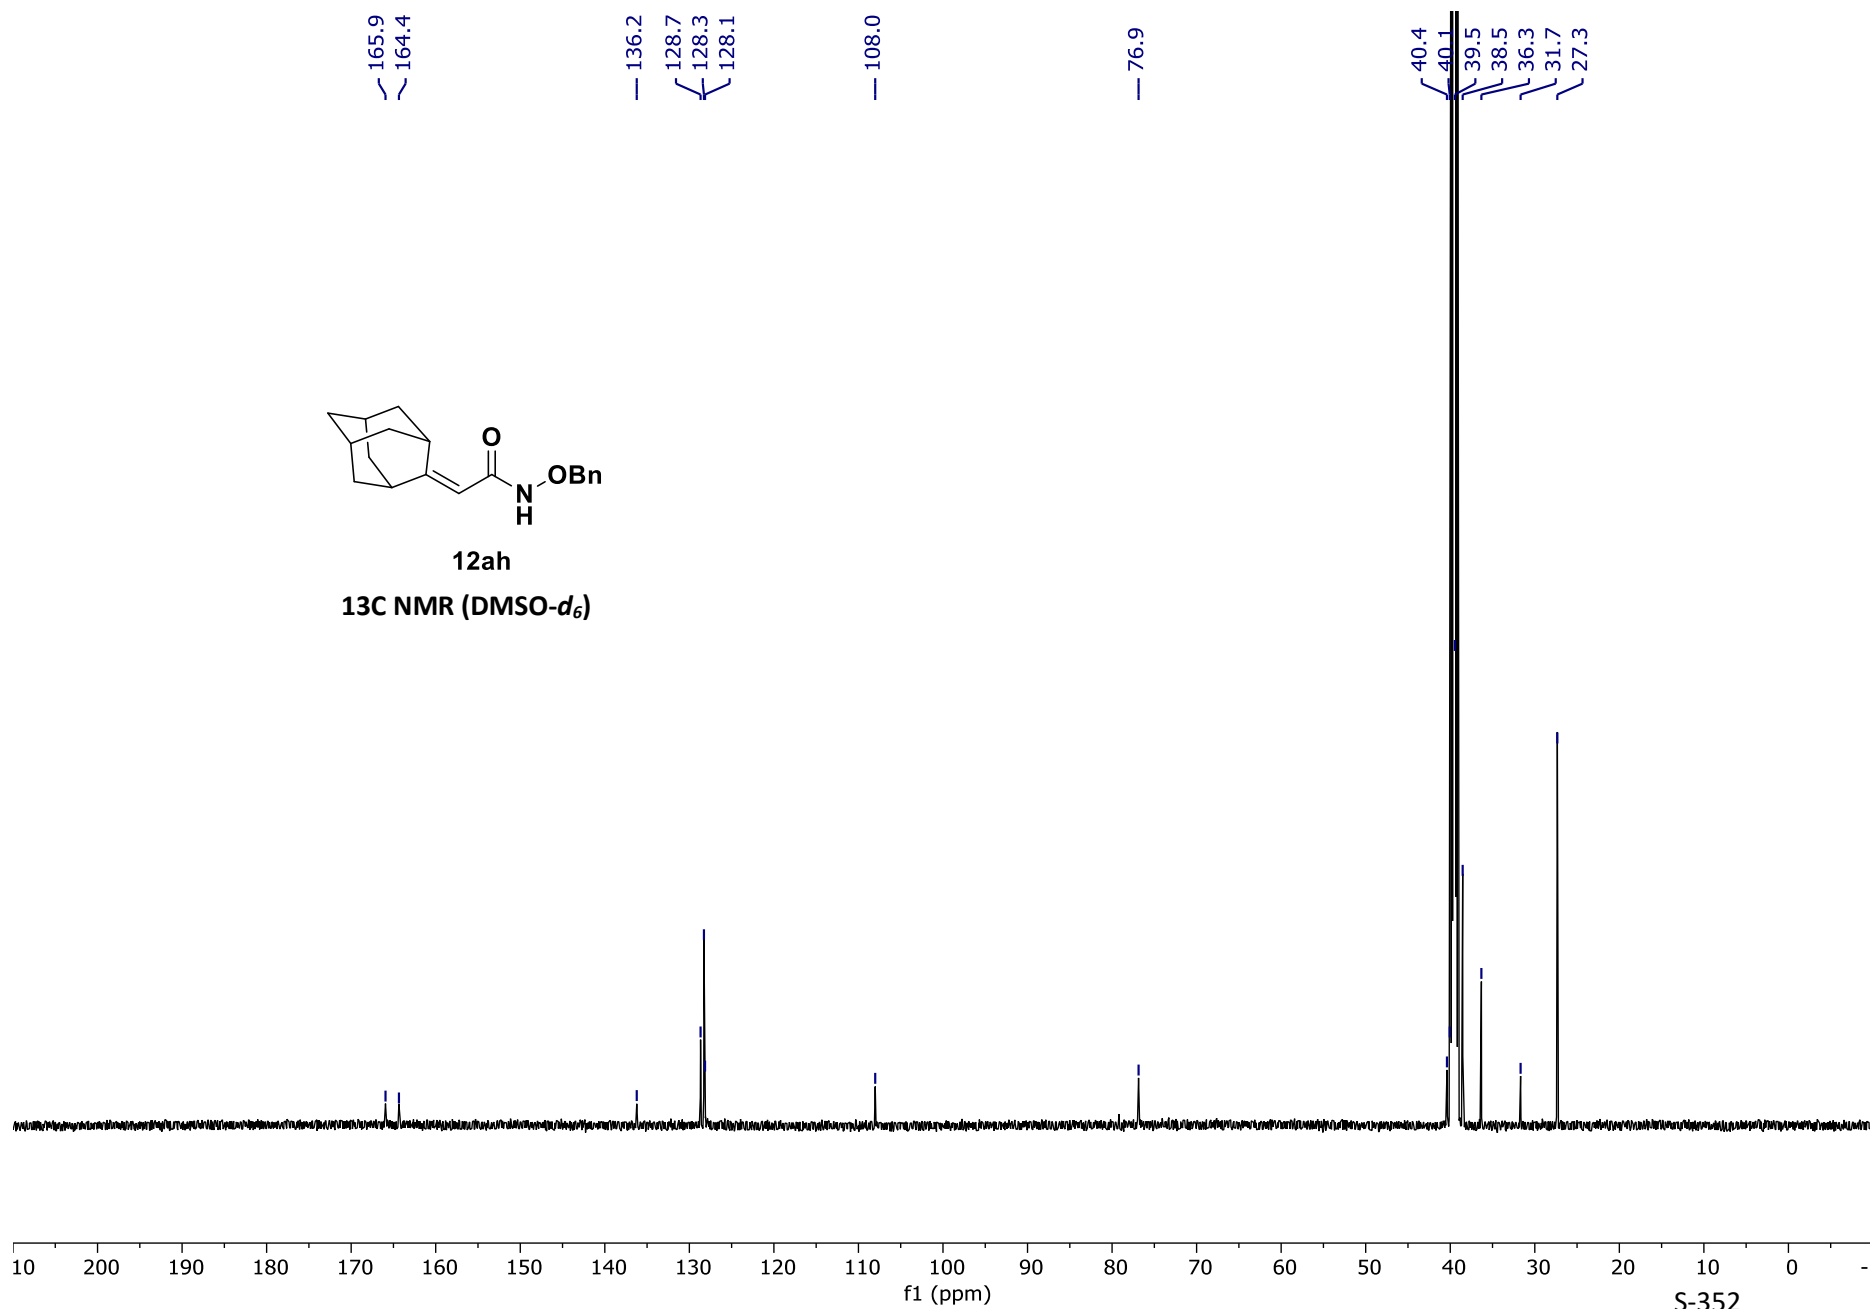

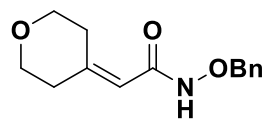

12ai  
1H NMR (DMSO-d<sub>6</sub>)

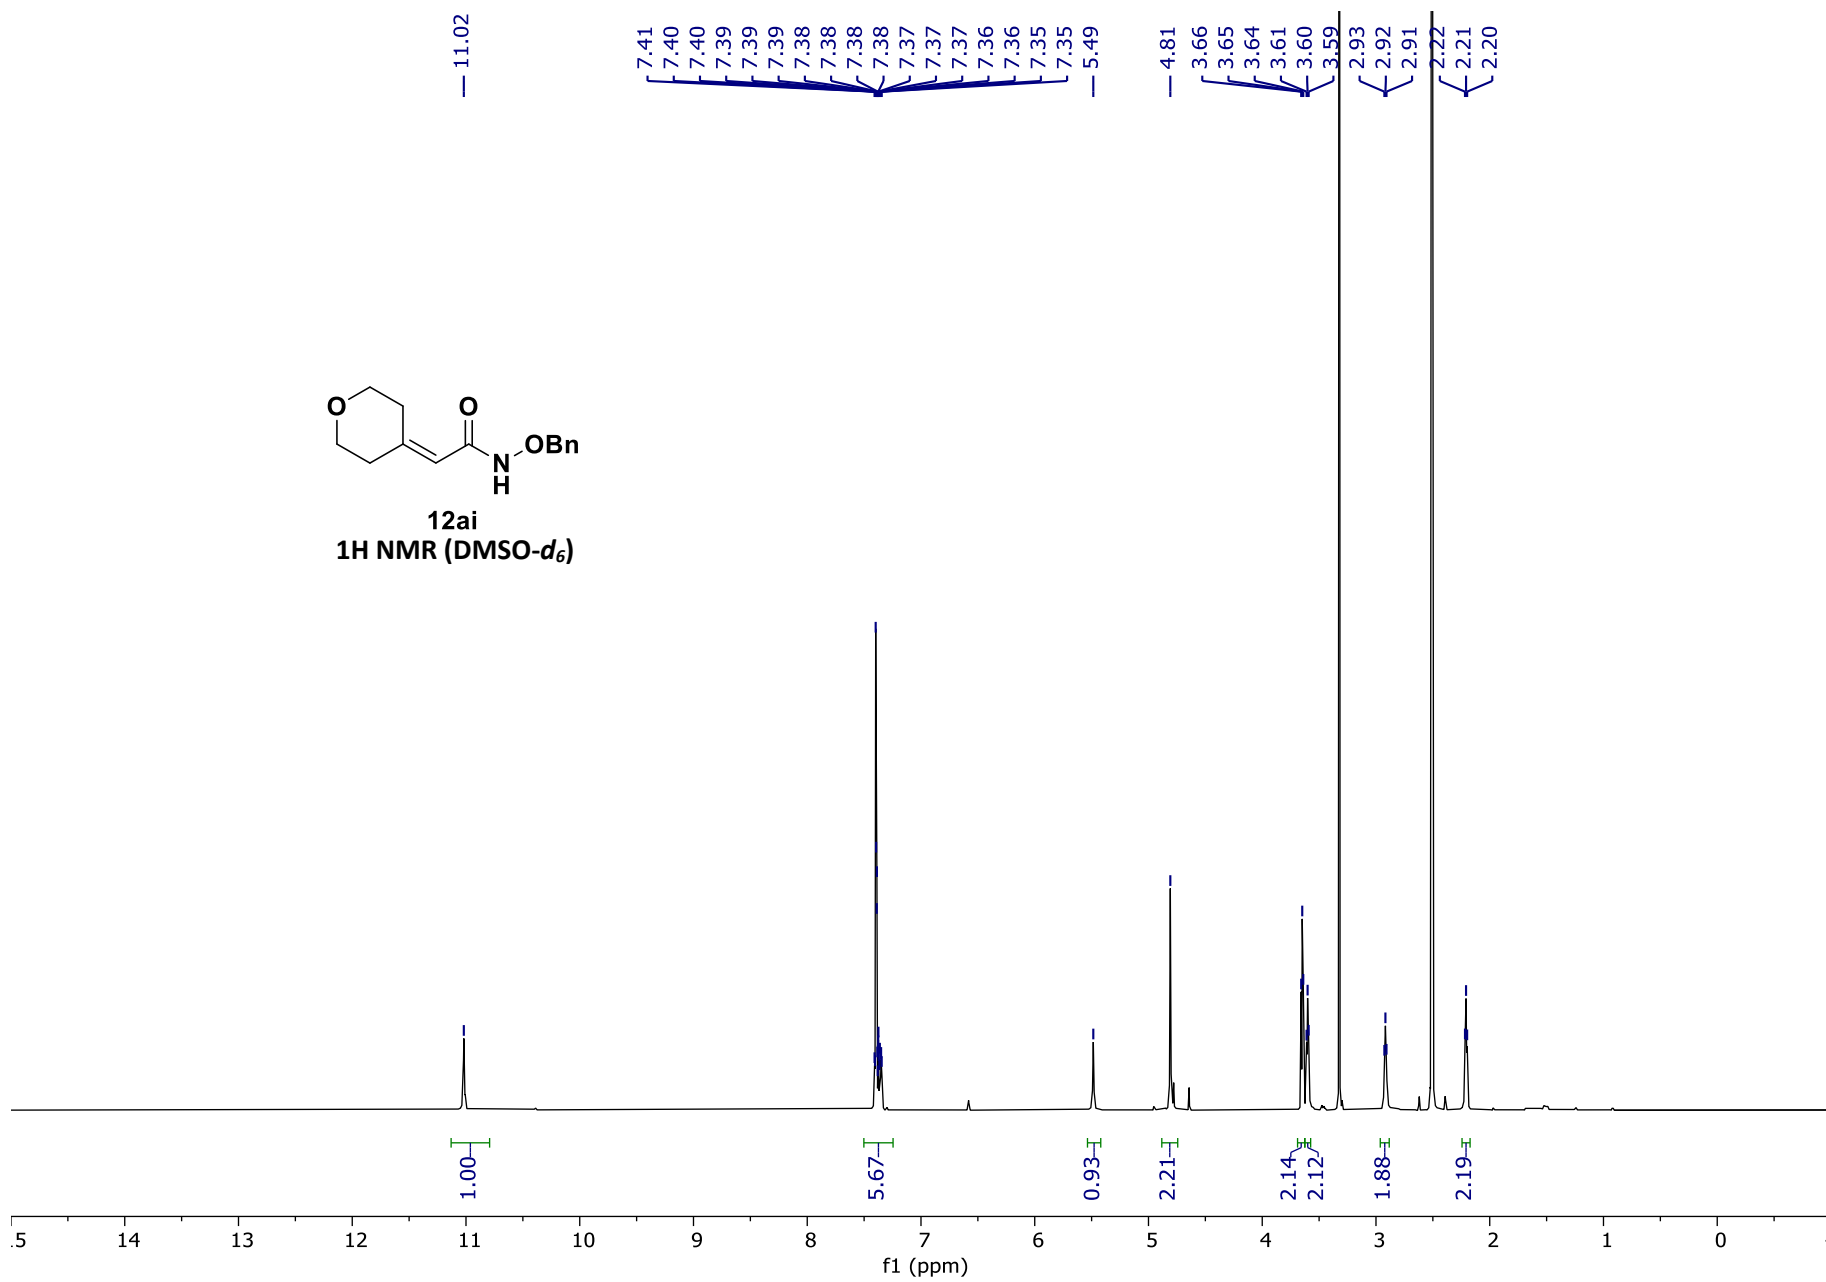

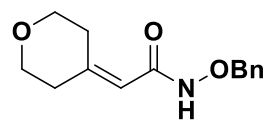

12ai

<sup>13</sup>C NMR (DMSO-*d*<sub>6</sub>)

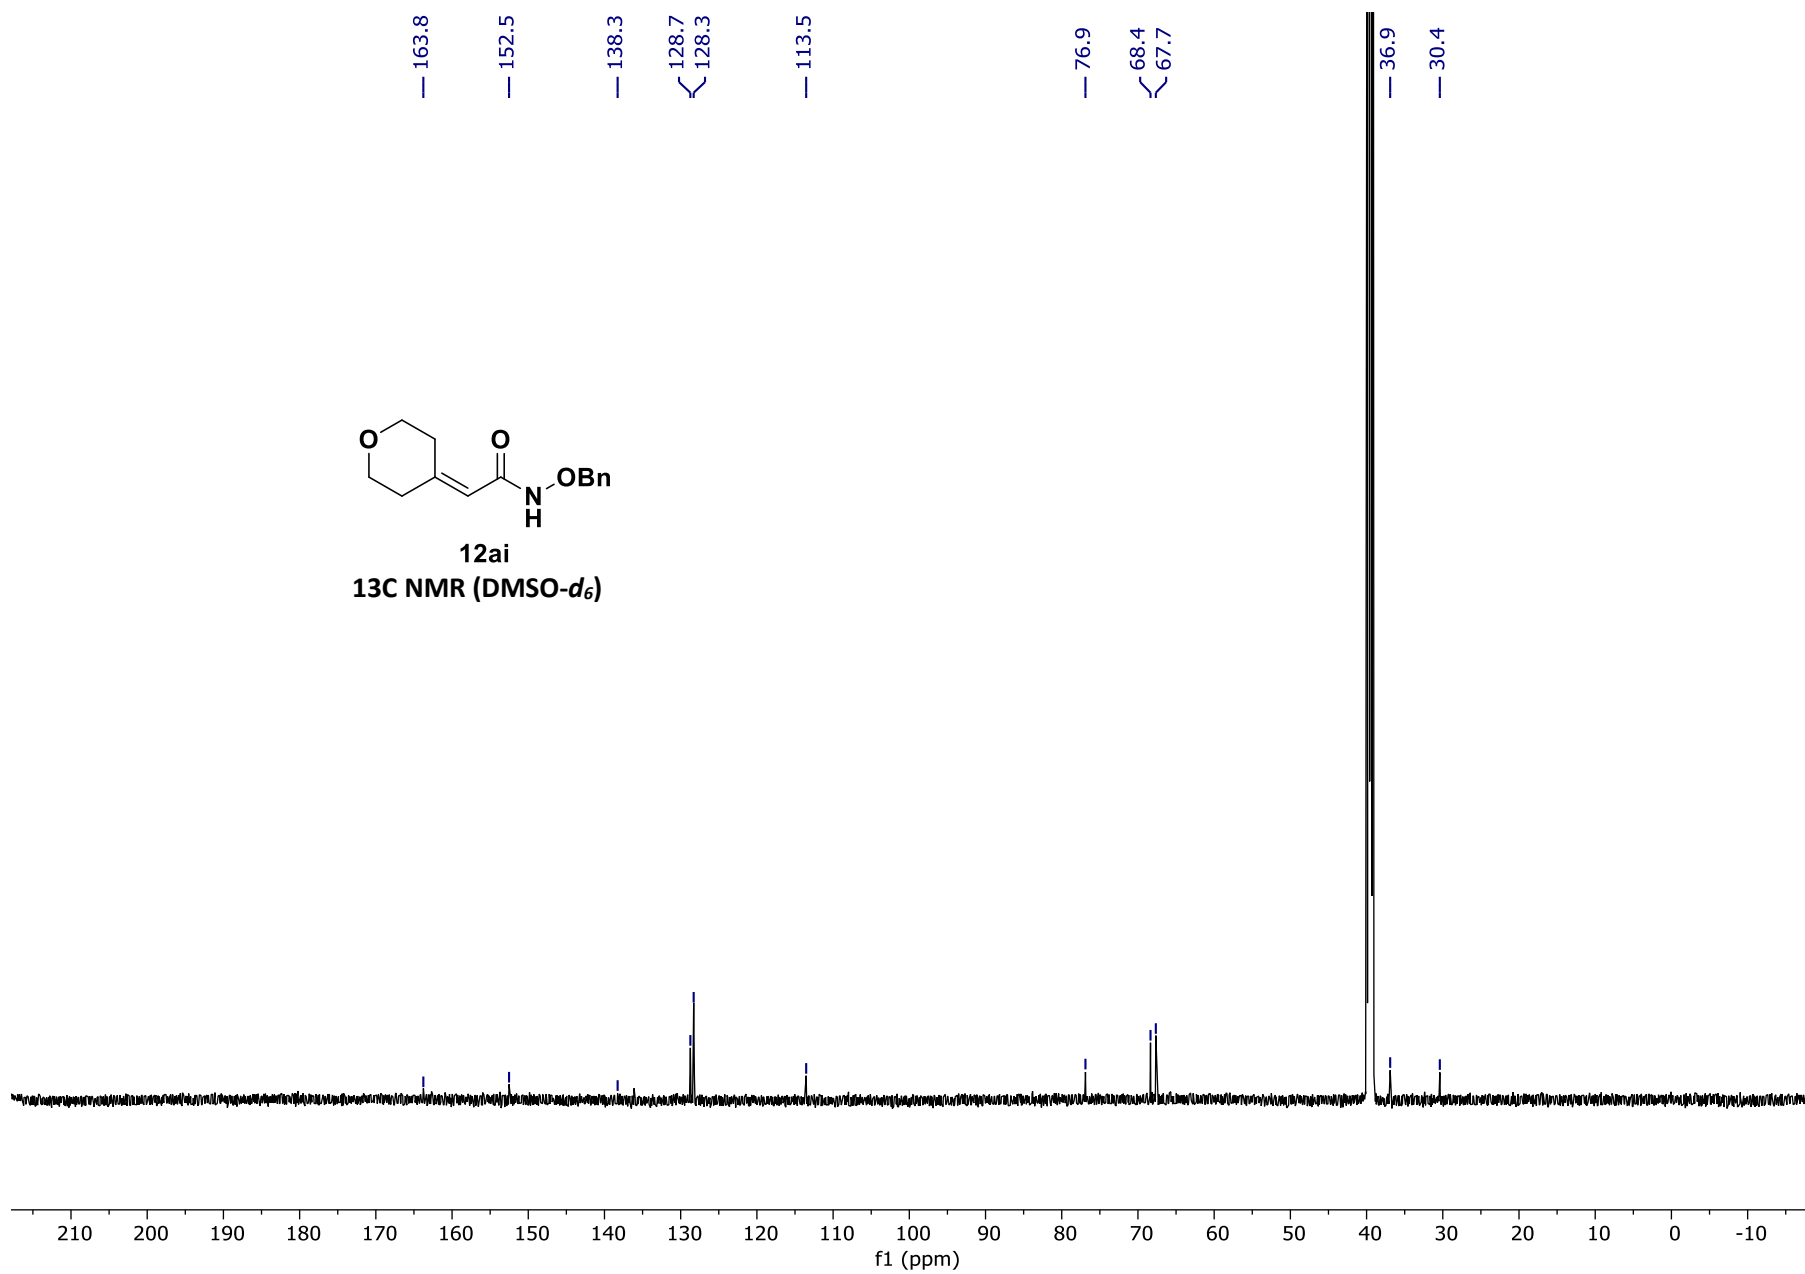

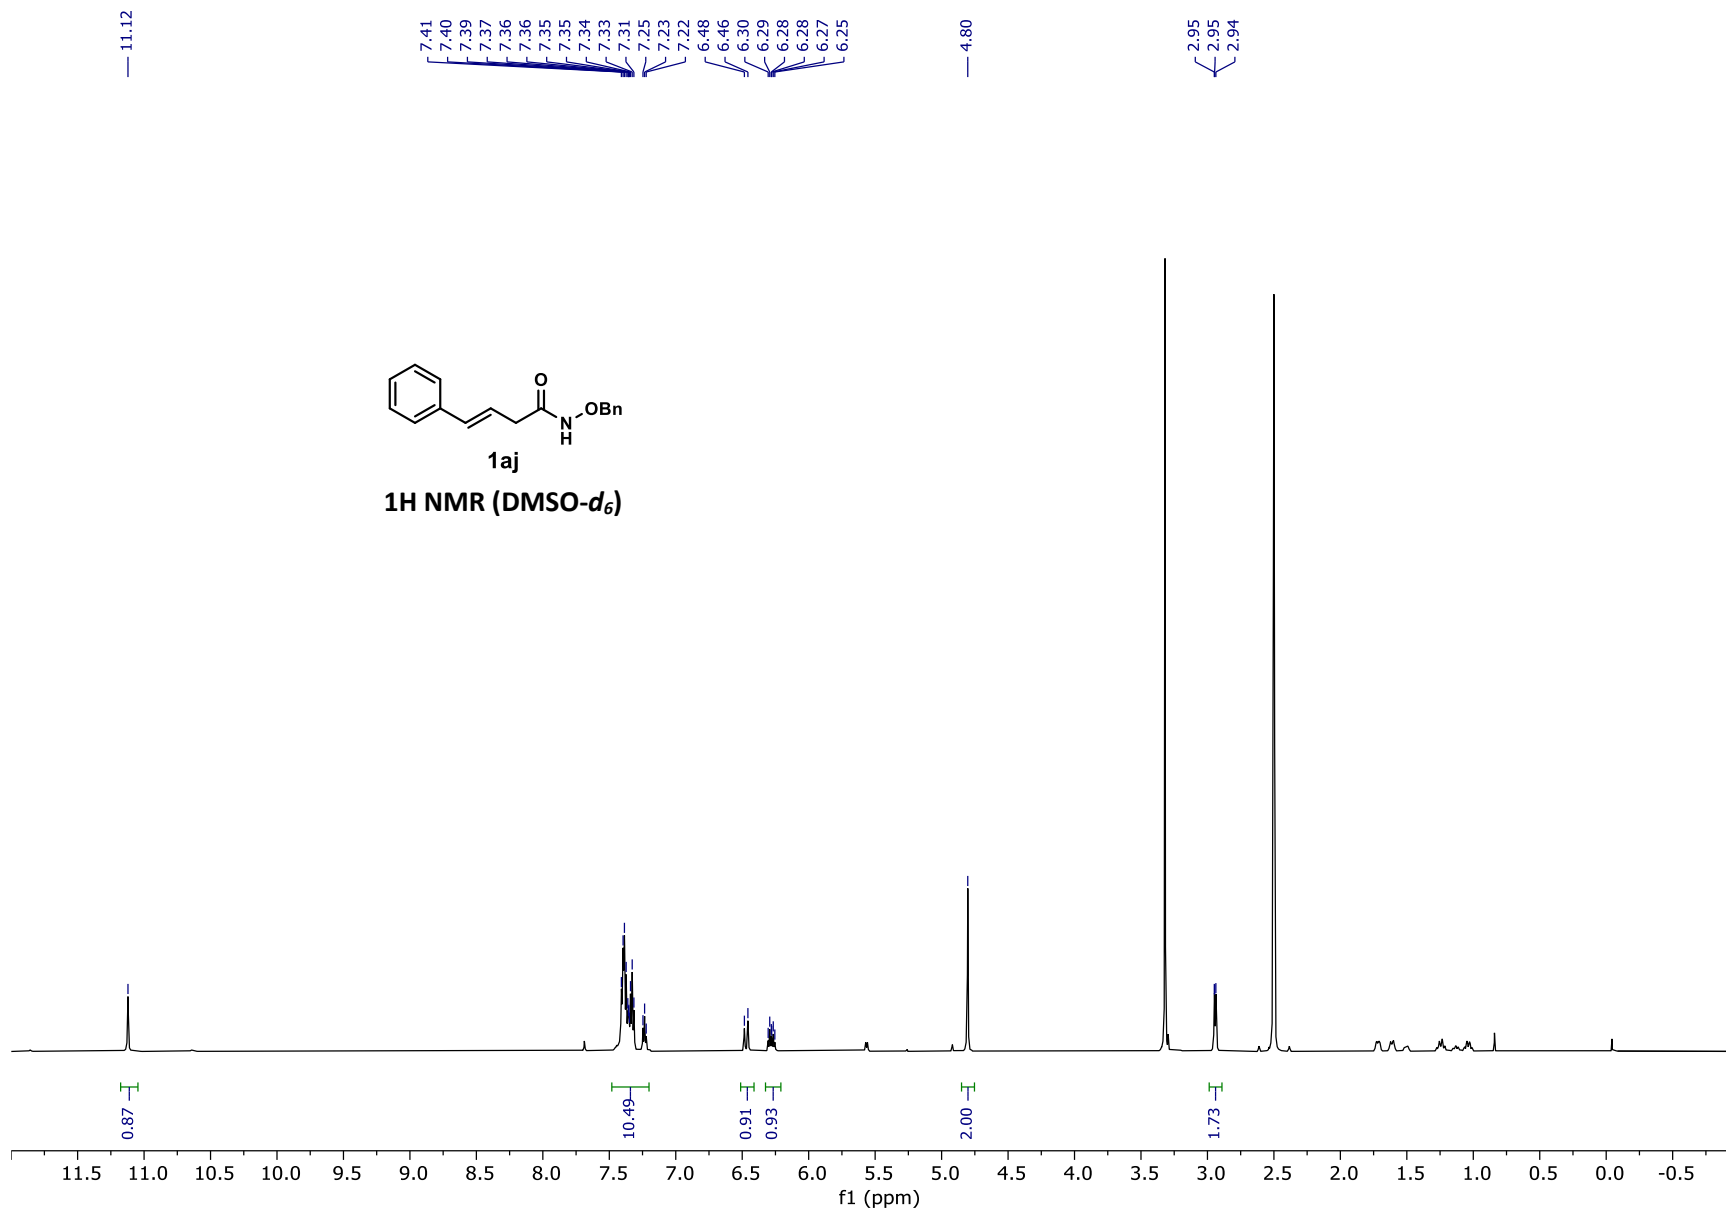

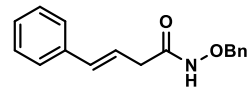

1aj  
13C NMR (DMSO-d<sub>6</sub>)

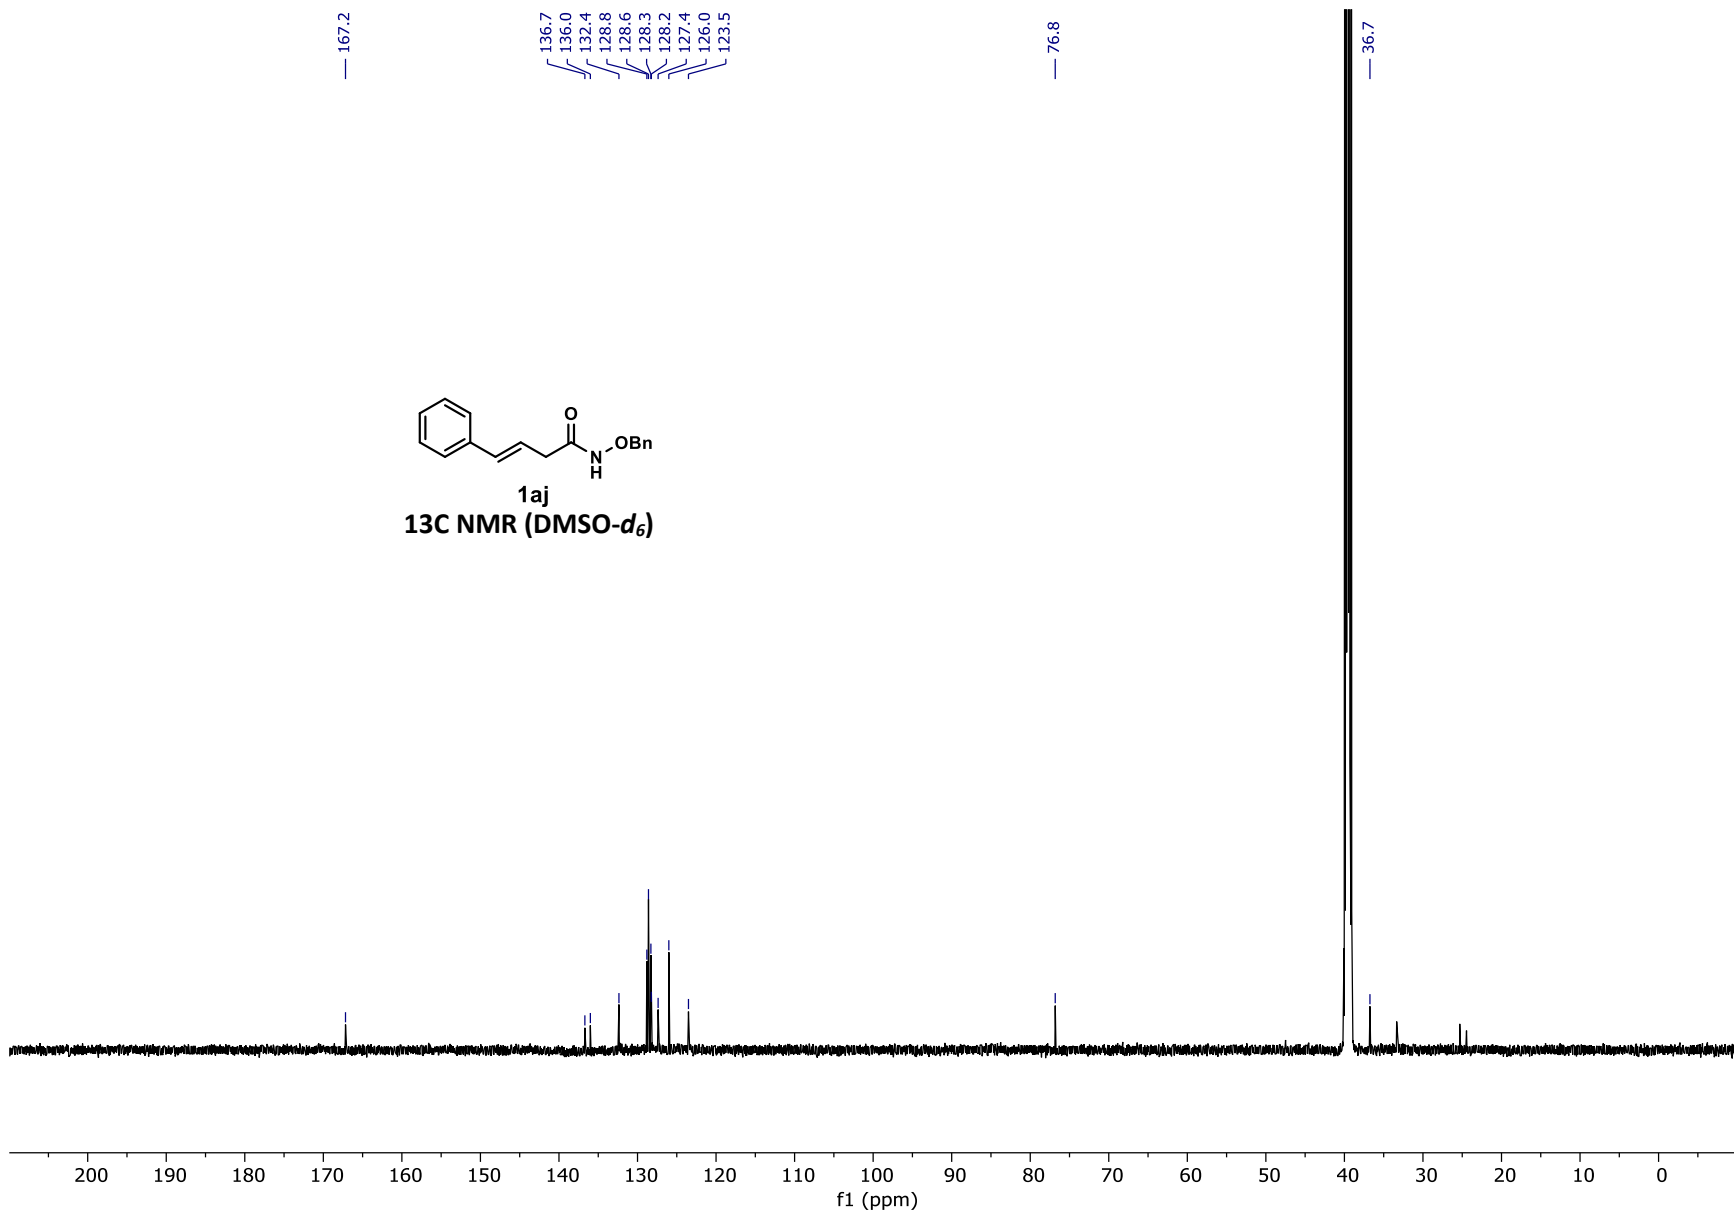



10.98

7.38  
7.38  
7.36  
7.36  
7.35  
7.34  
7.34  
7.33  
7.32  
7.31  
7.31

4.76  
4.69  
4.65

2.21  
2.19  
2.18  
2.10  
2.09  
2.08  
2.07  
1.67

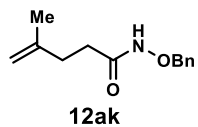

1H NMR (DMSO-d<sub>6</sub>)

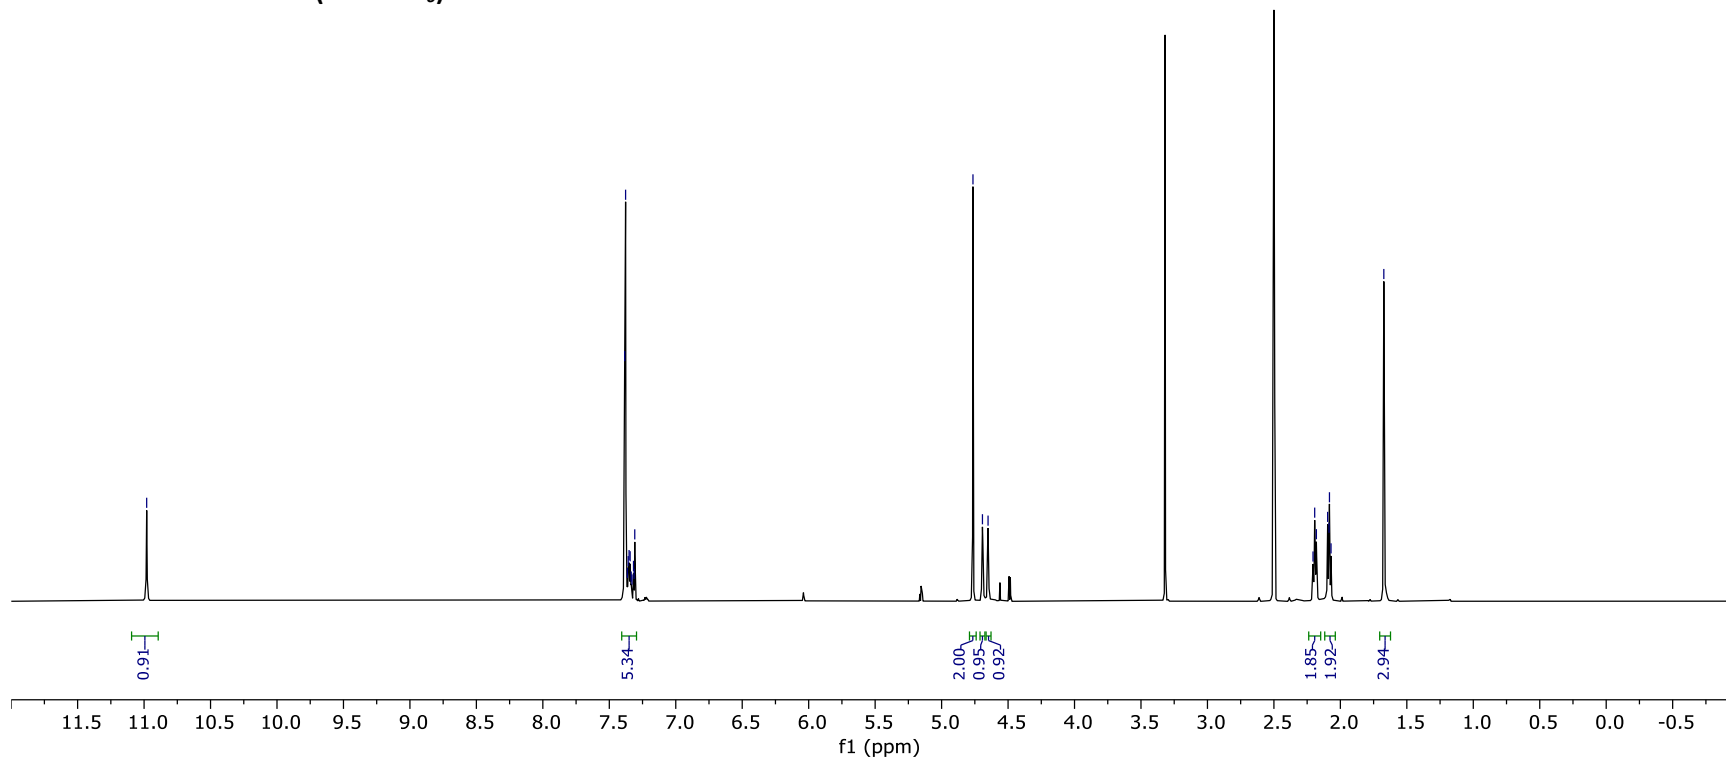

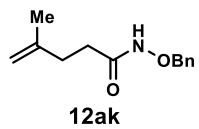

**<sup>13</sup>C NMR (DMSO-*d*<sub>6</sub>)**

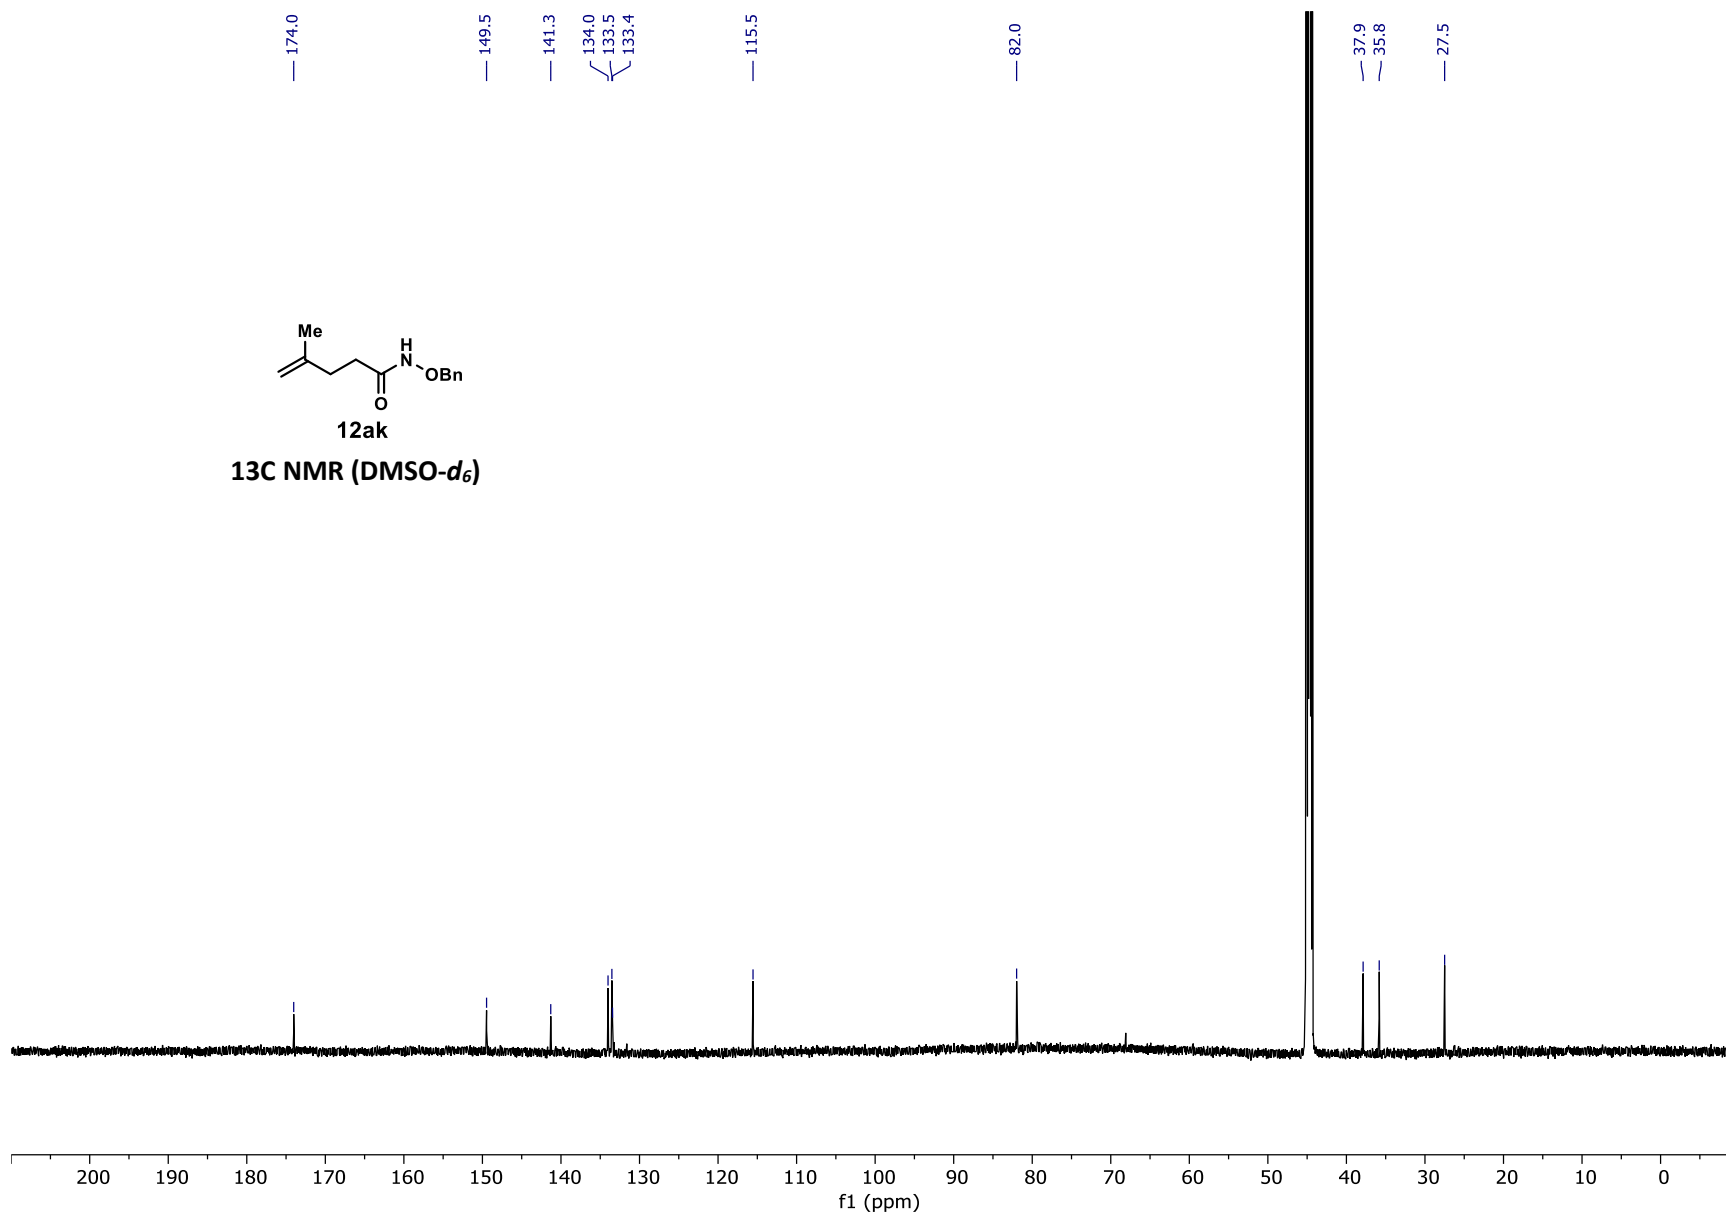

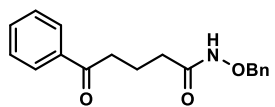

12aI

<sup>1</sup>H NMR (DMSO-d<sub>6</sub>)

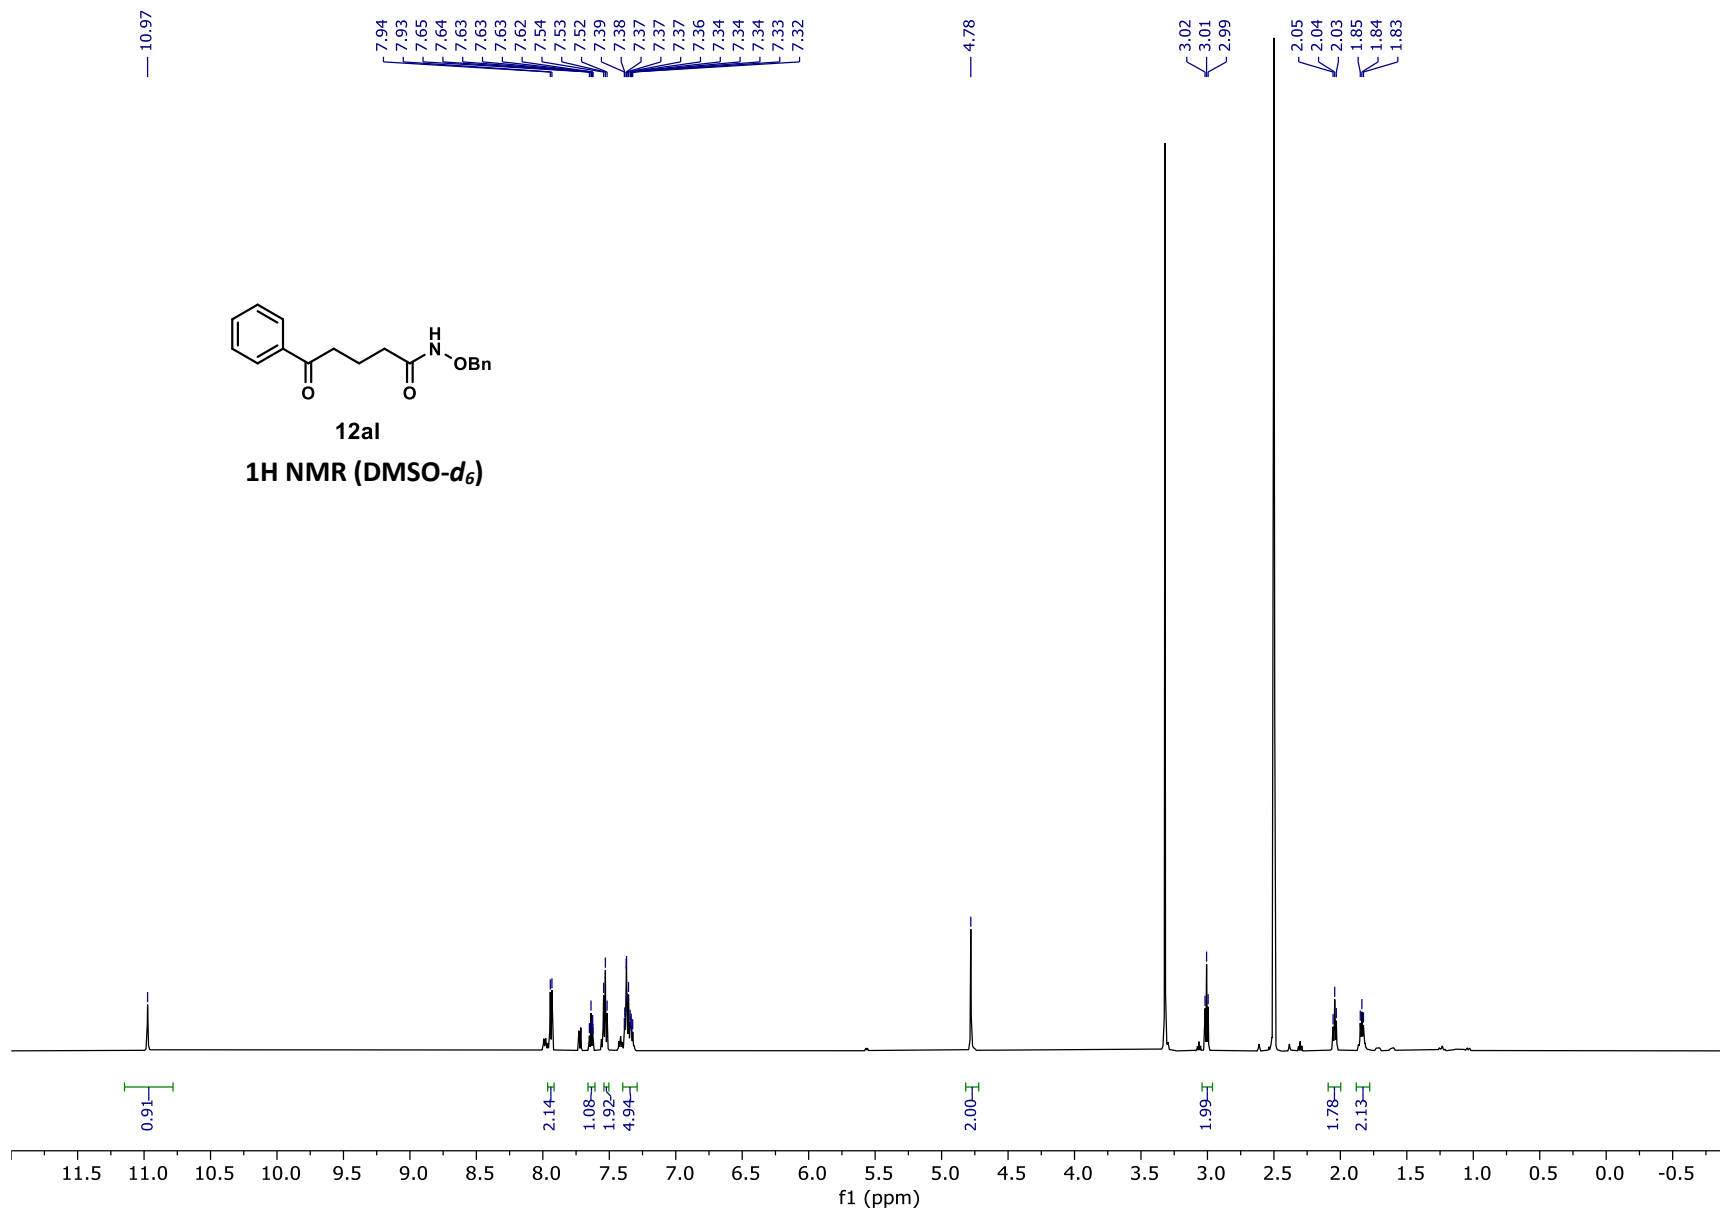

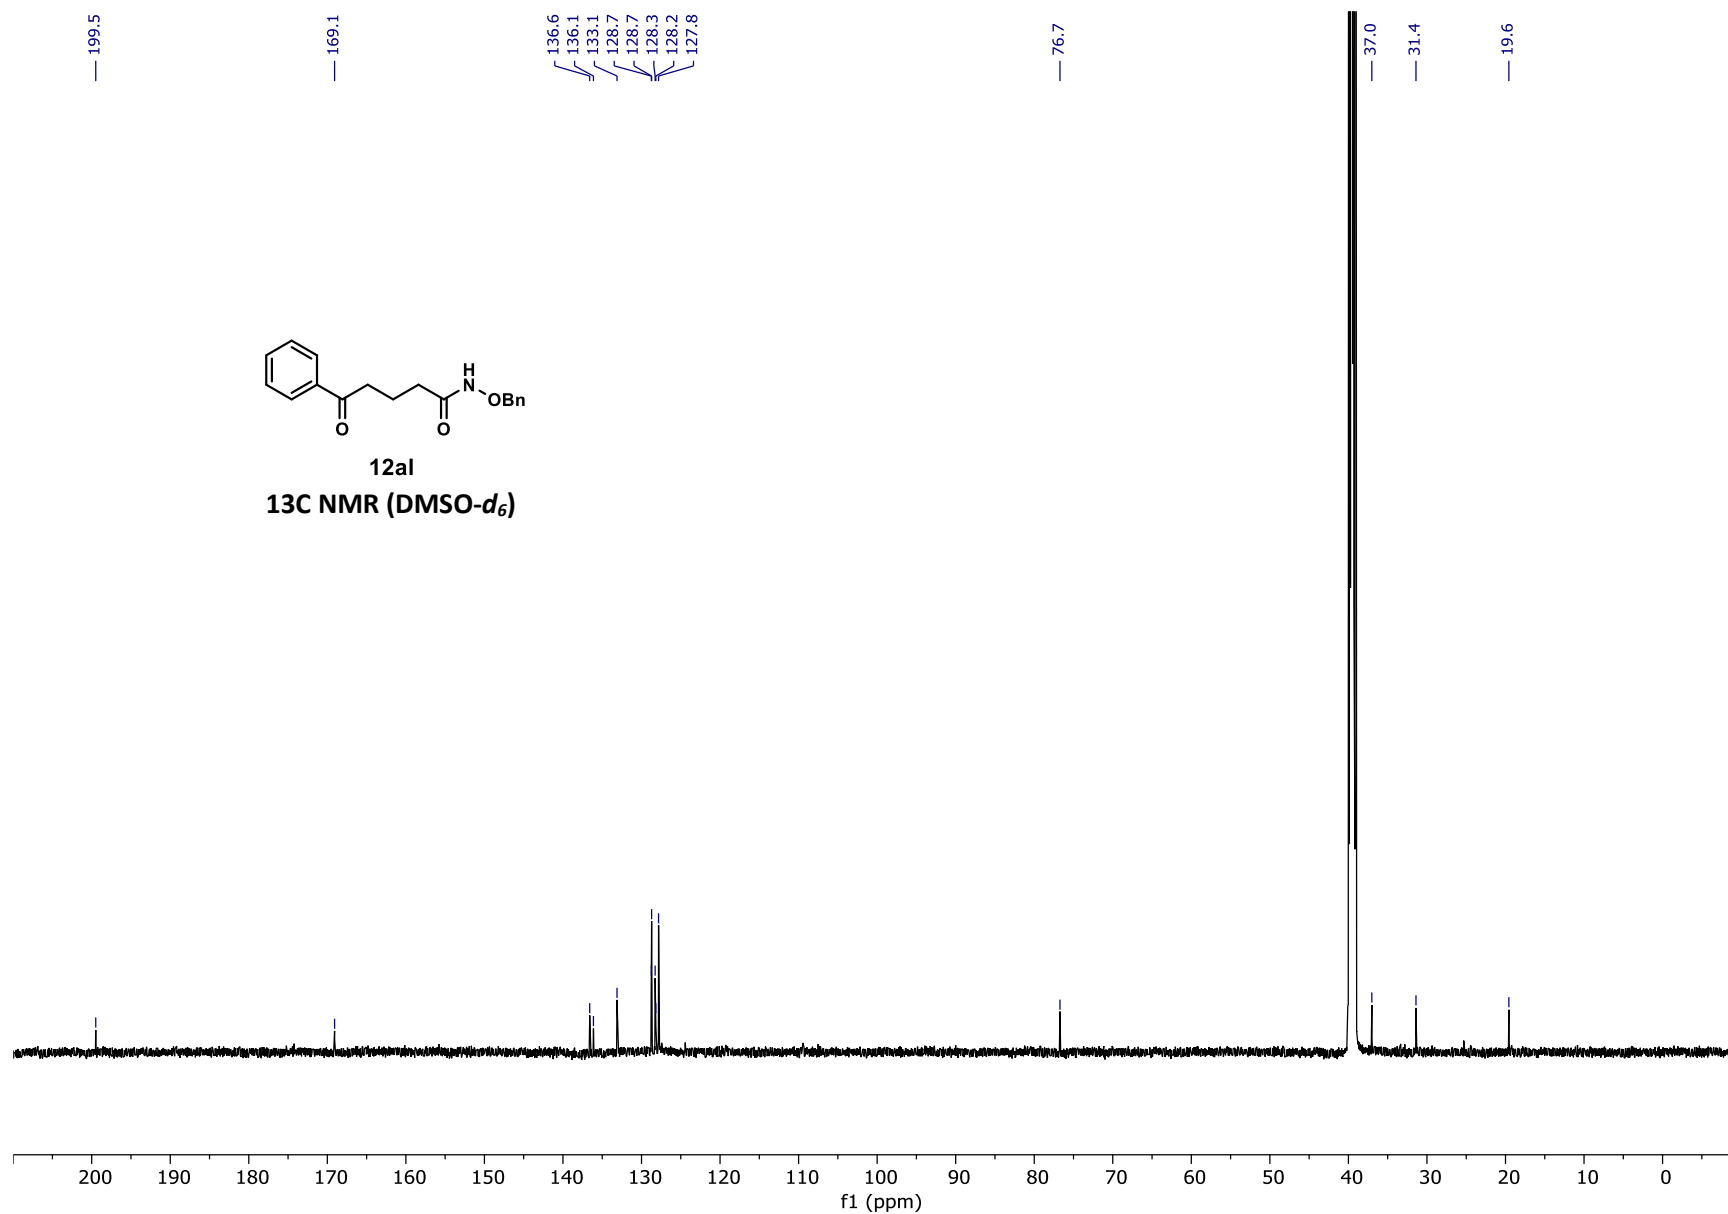

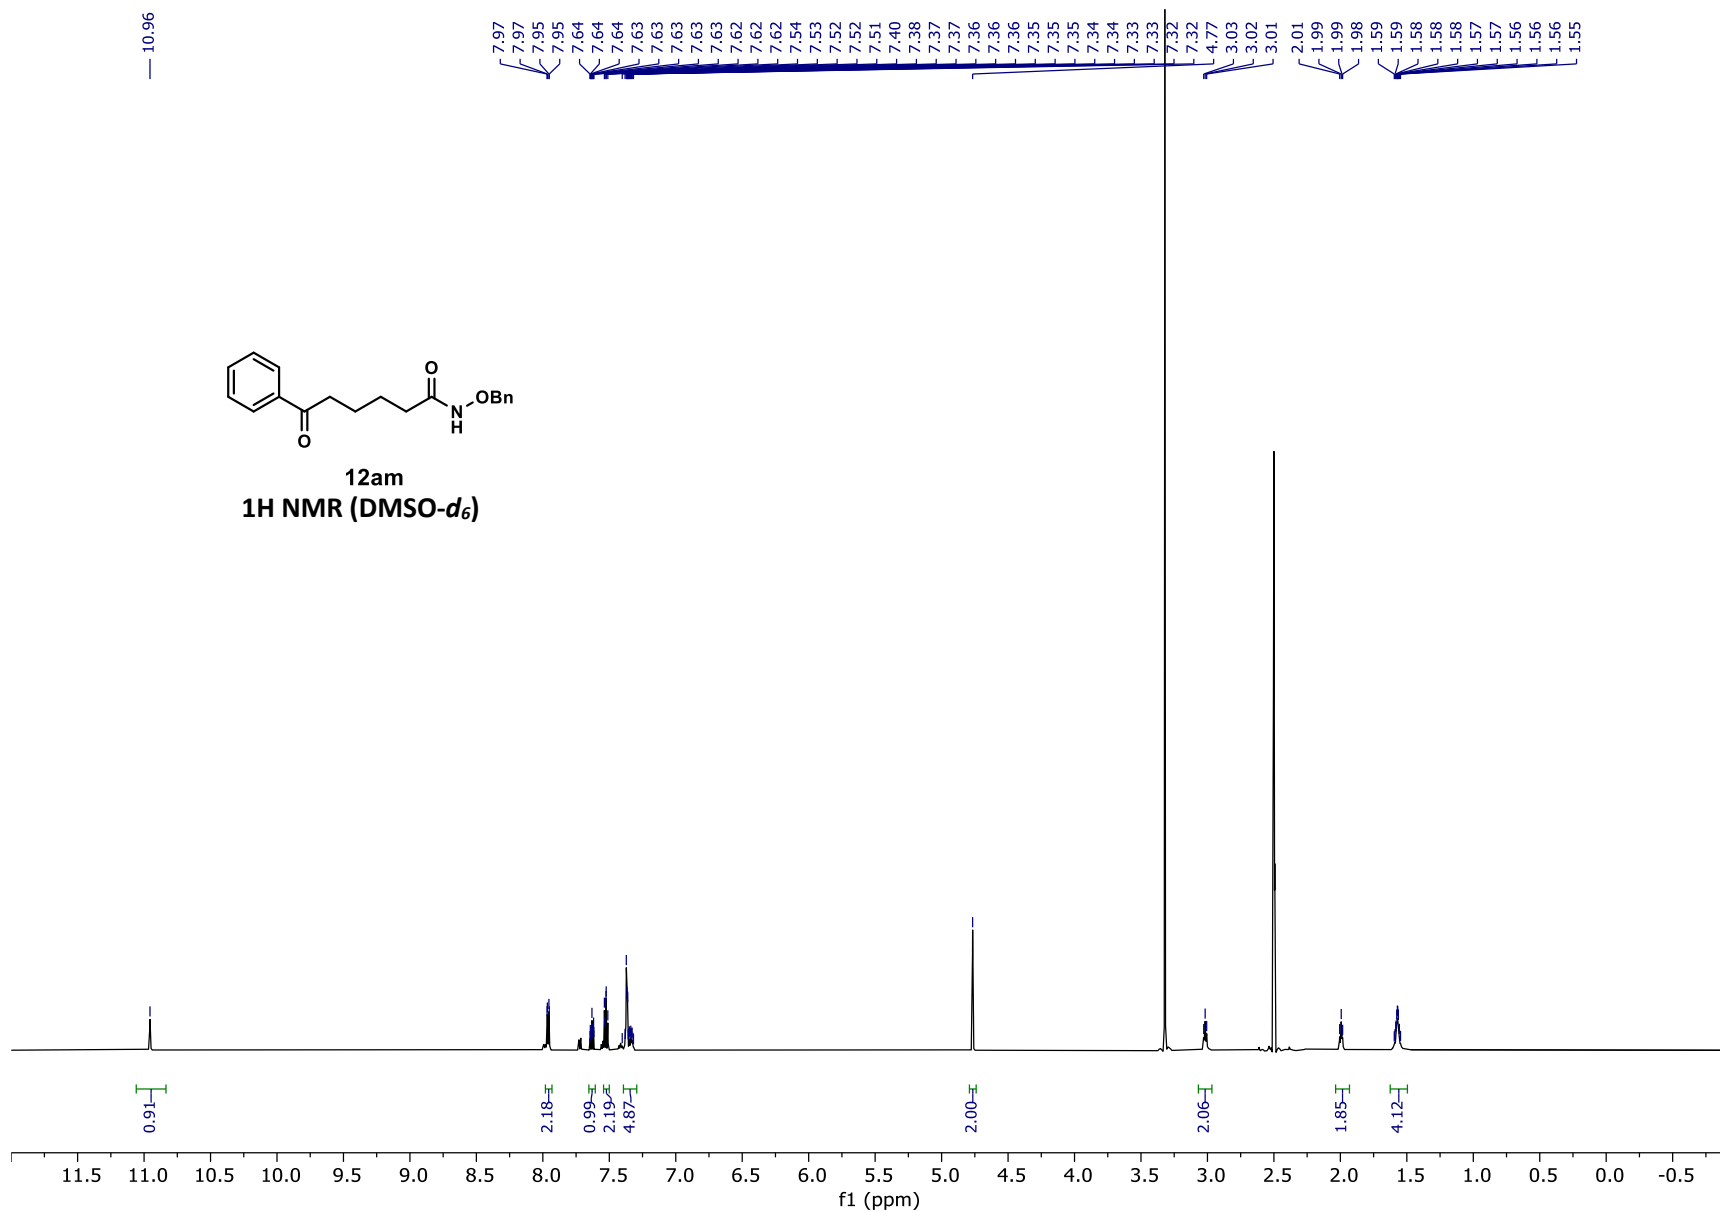

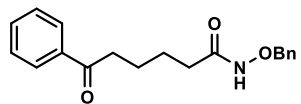

12am  
13C NMR (DMSO-d<sub>6</sub>)

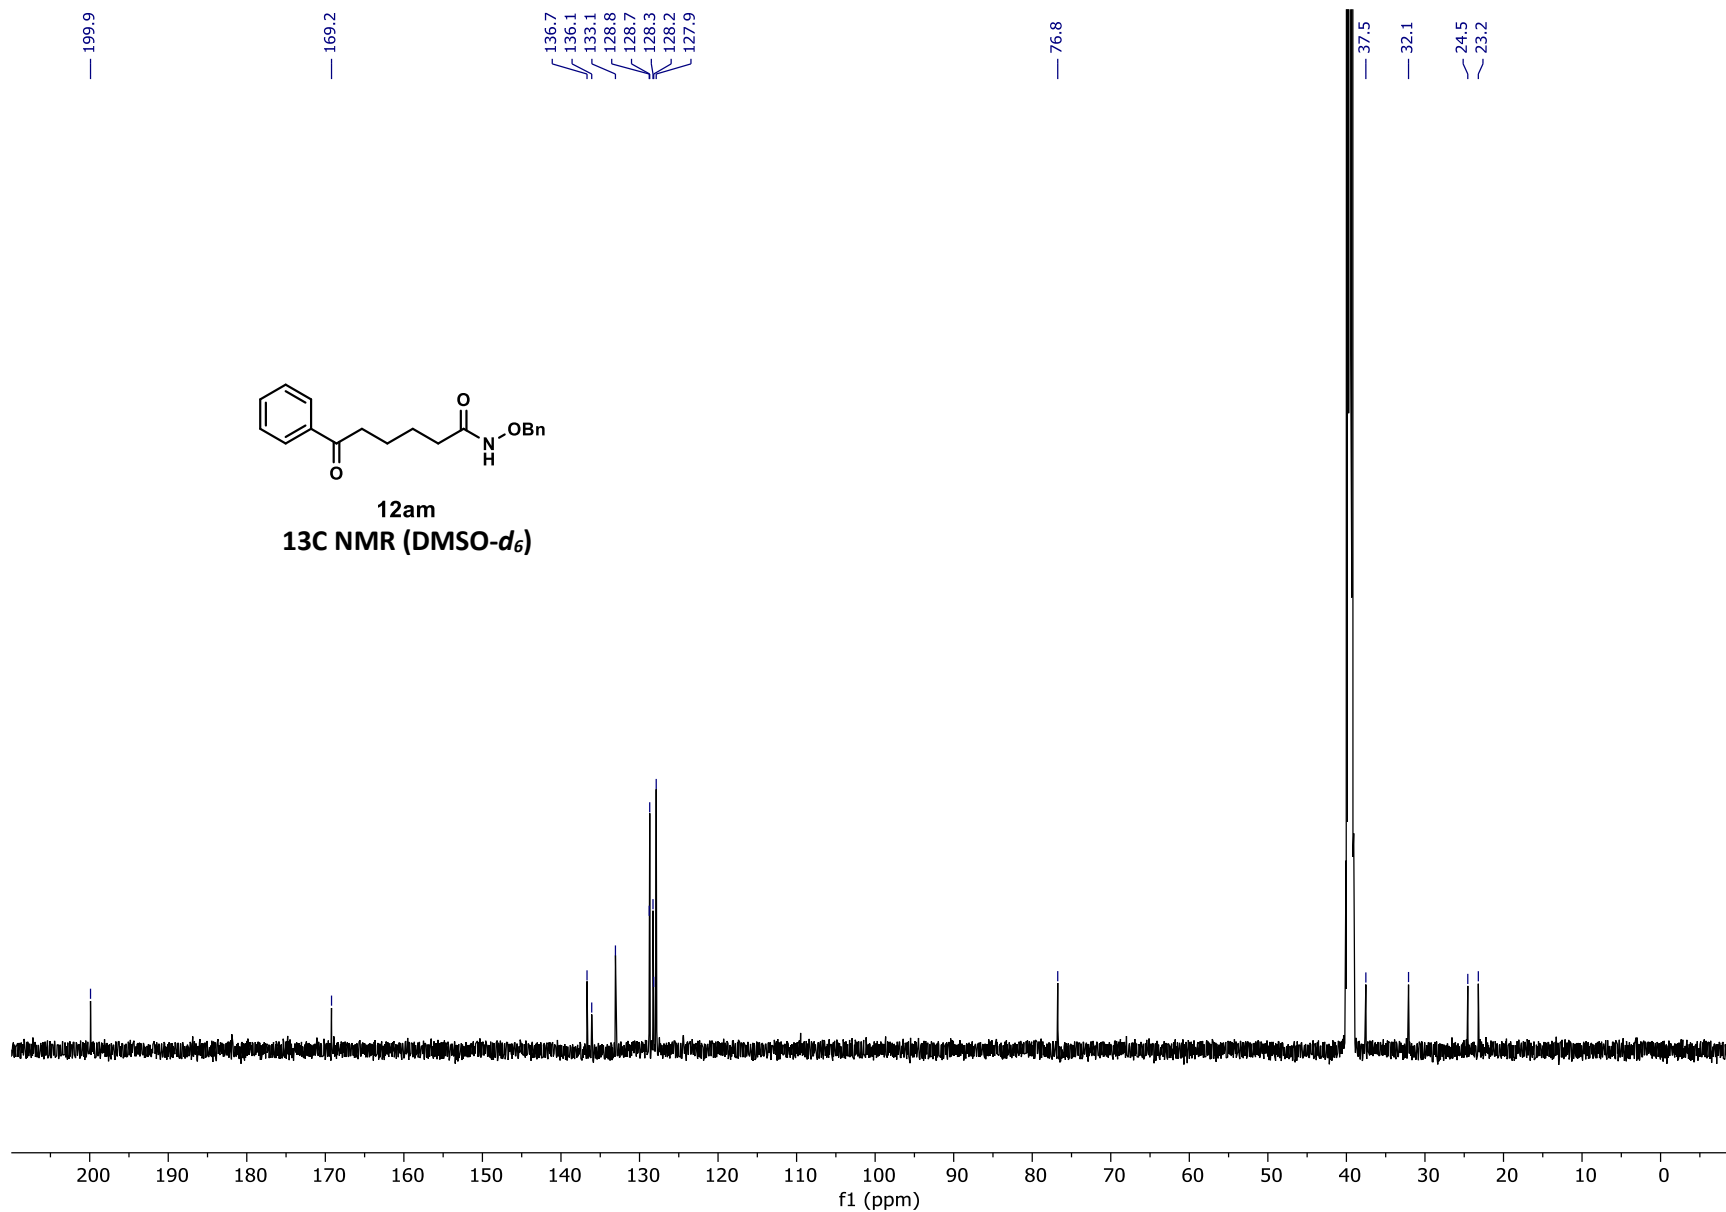

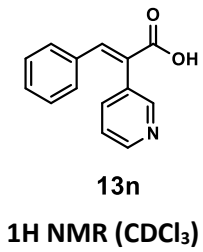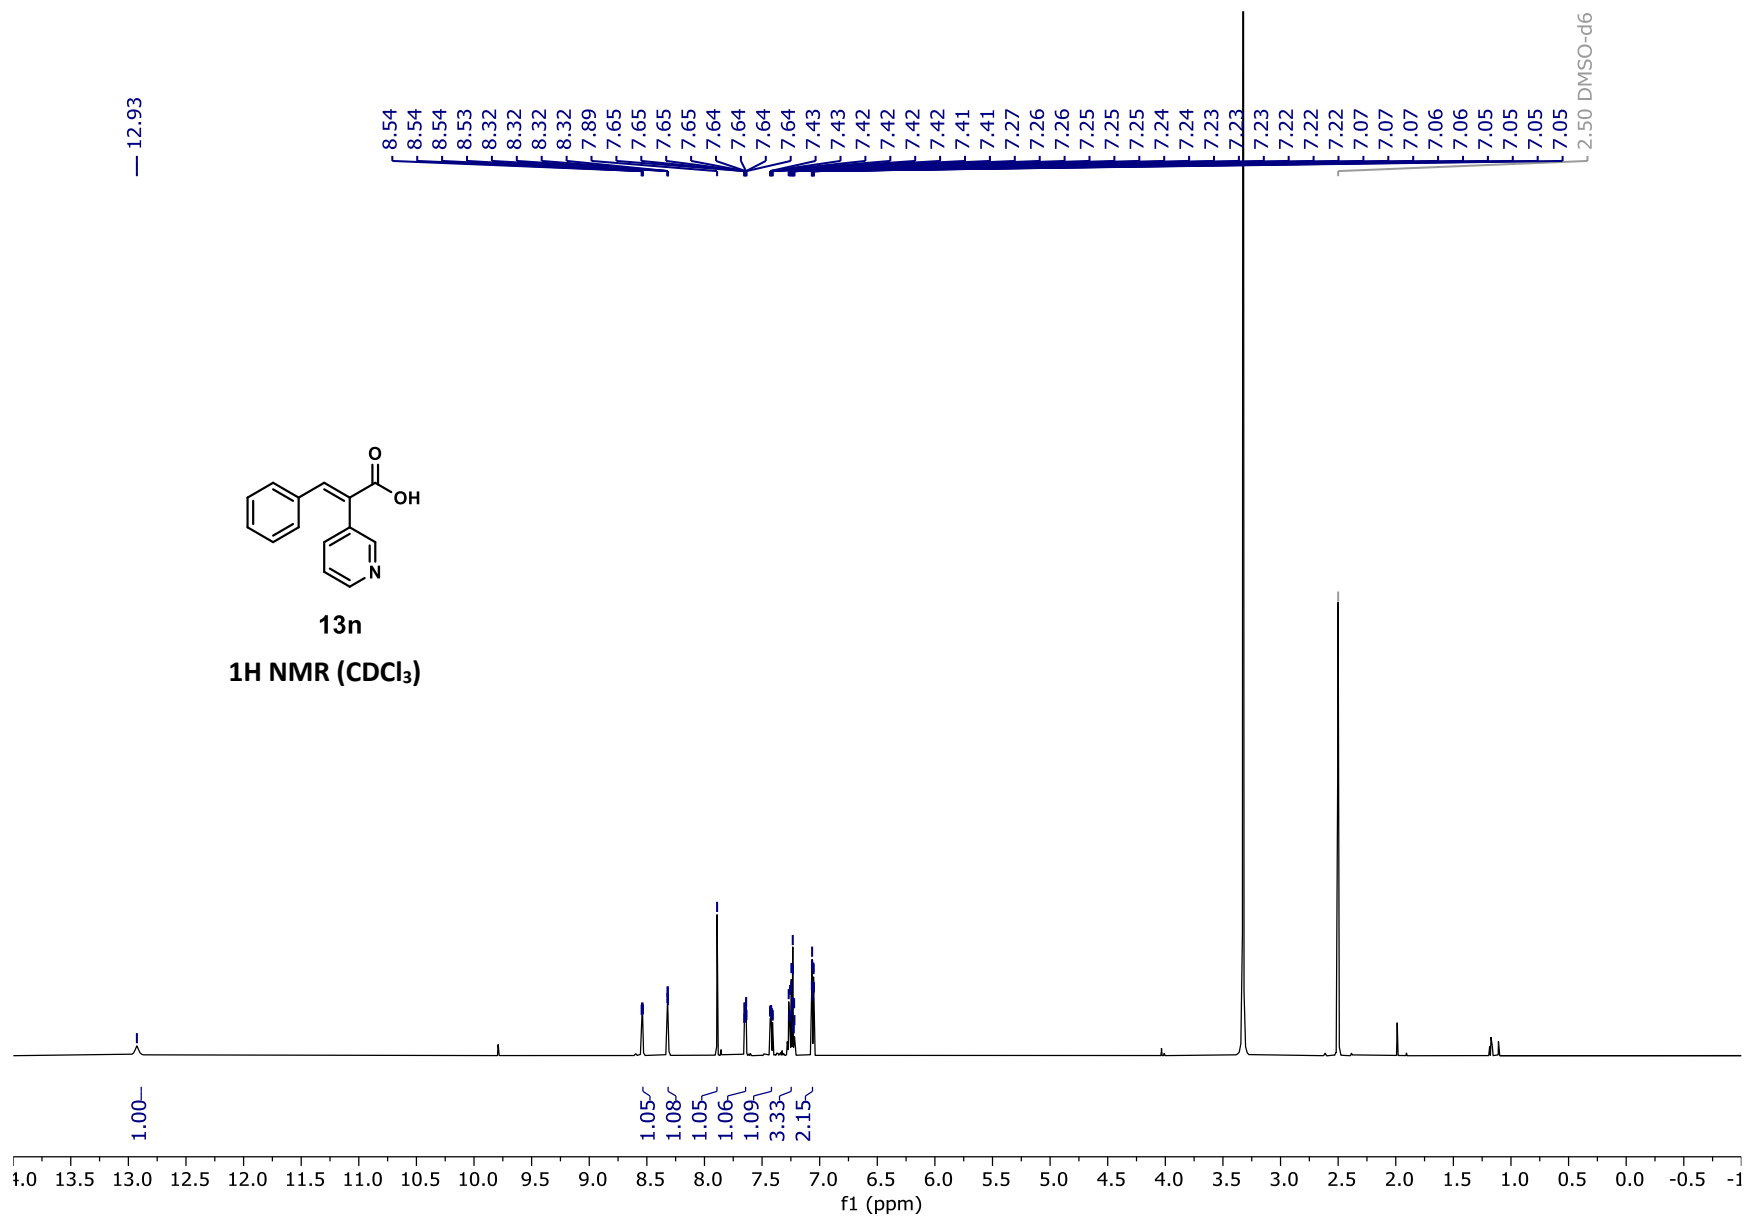

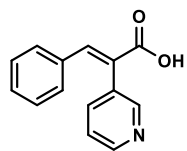

**13n**  
**<sup>13</sup>C NMR (CDCl<sub>3</sub>)**

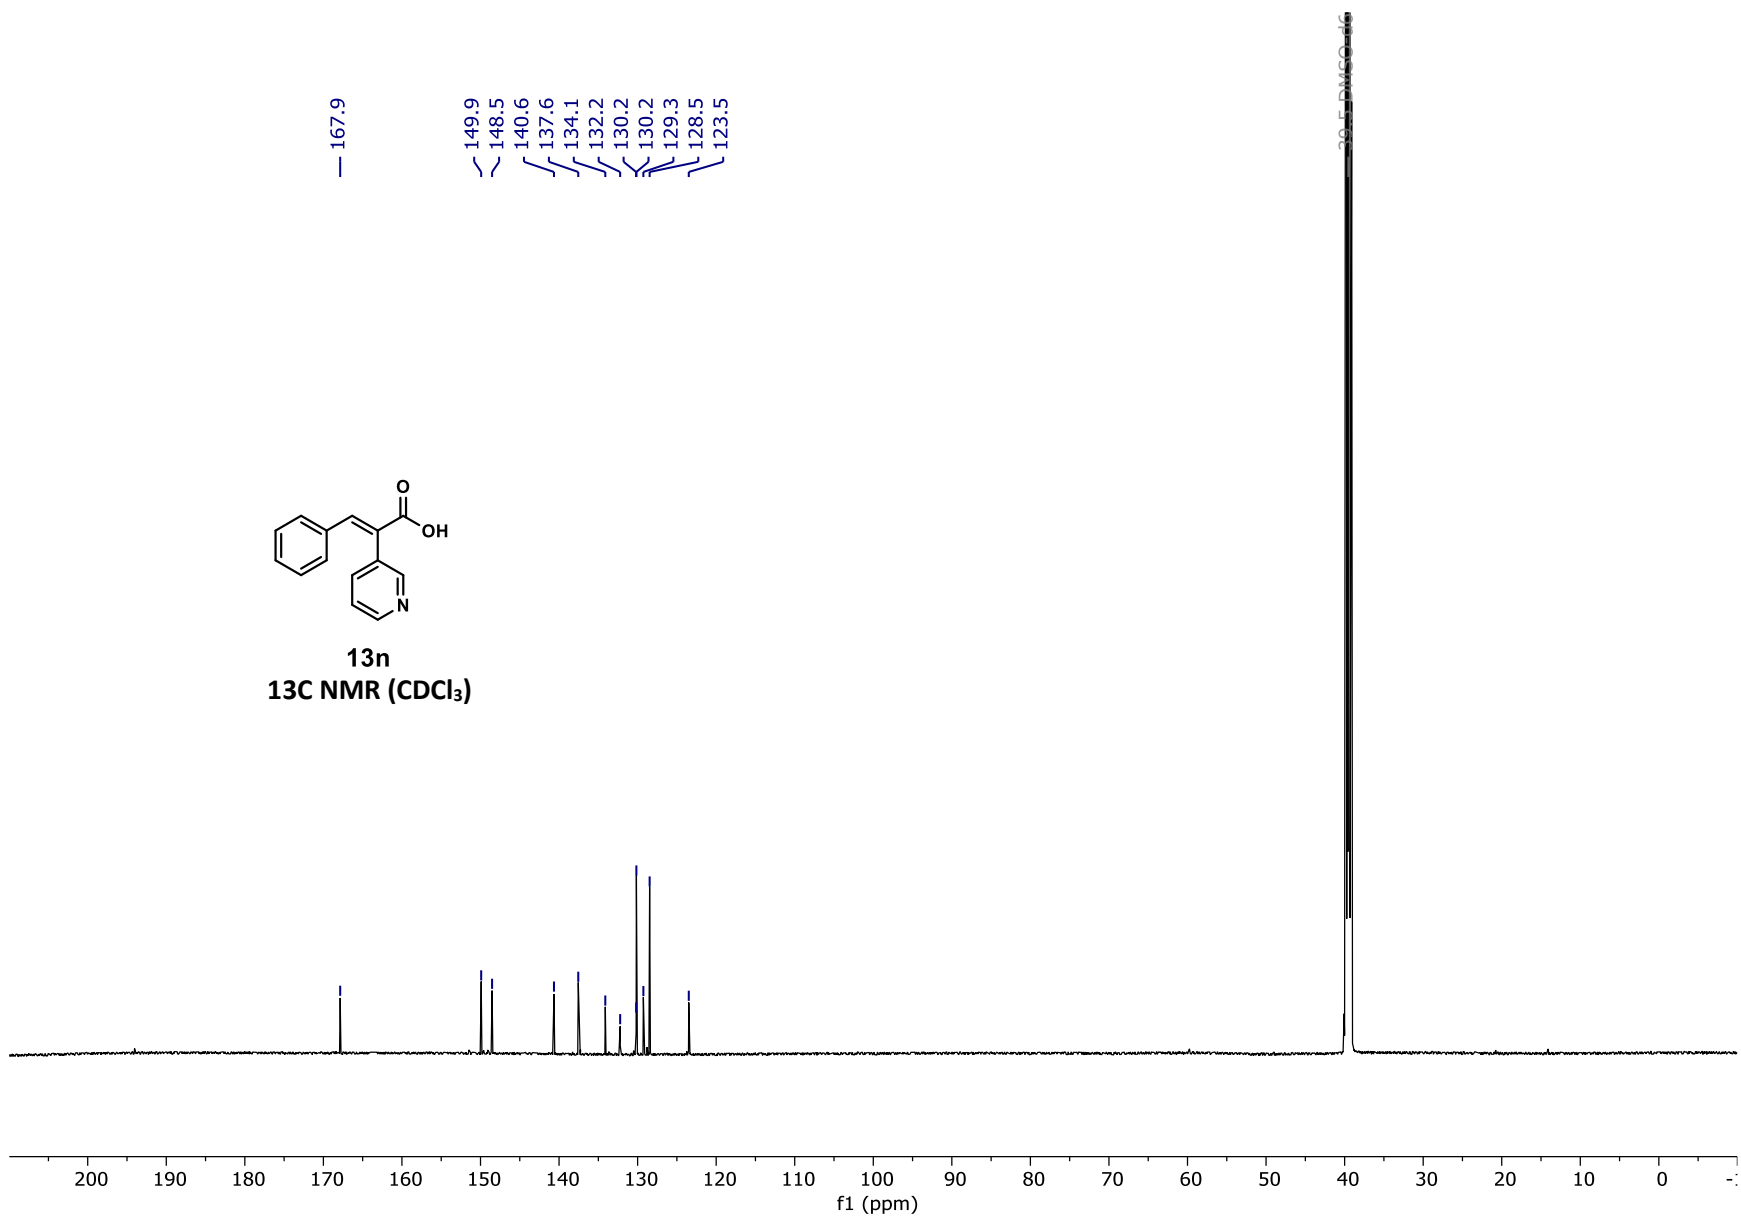



7.93  
7.38  
7.38  
7.37  
7.37  
7.37  
7.37  
7.36  
7.36  
7.24  
7.24  
7.23  
7.22  
7.22  
7.21  
7.21  
7.21  
7.19  
7.18  
7.18  
7.17  
7.17  
7.16  
7.16  
7.12  
7.12  
7.11  
7.11  
7.11  
7.10  
7.10  
7.10  
7.08  
7.08  
7.07  
7.06  
6.99  
6.98  
6.97  
6.97  
6.96  
6.95  
6.94  
6.94  
6.93  
6.93  
3.76

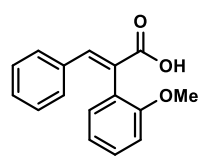

13o

1H NMR (CDCl<sub>3</sub>)

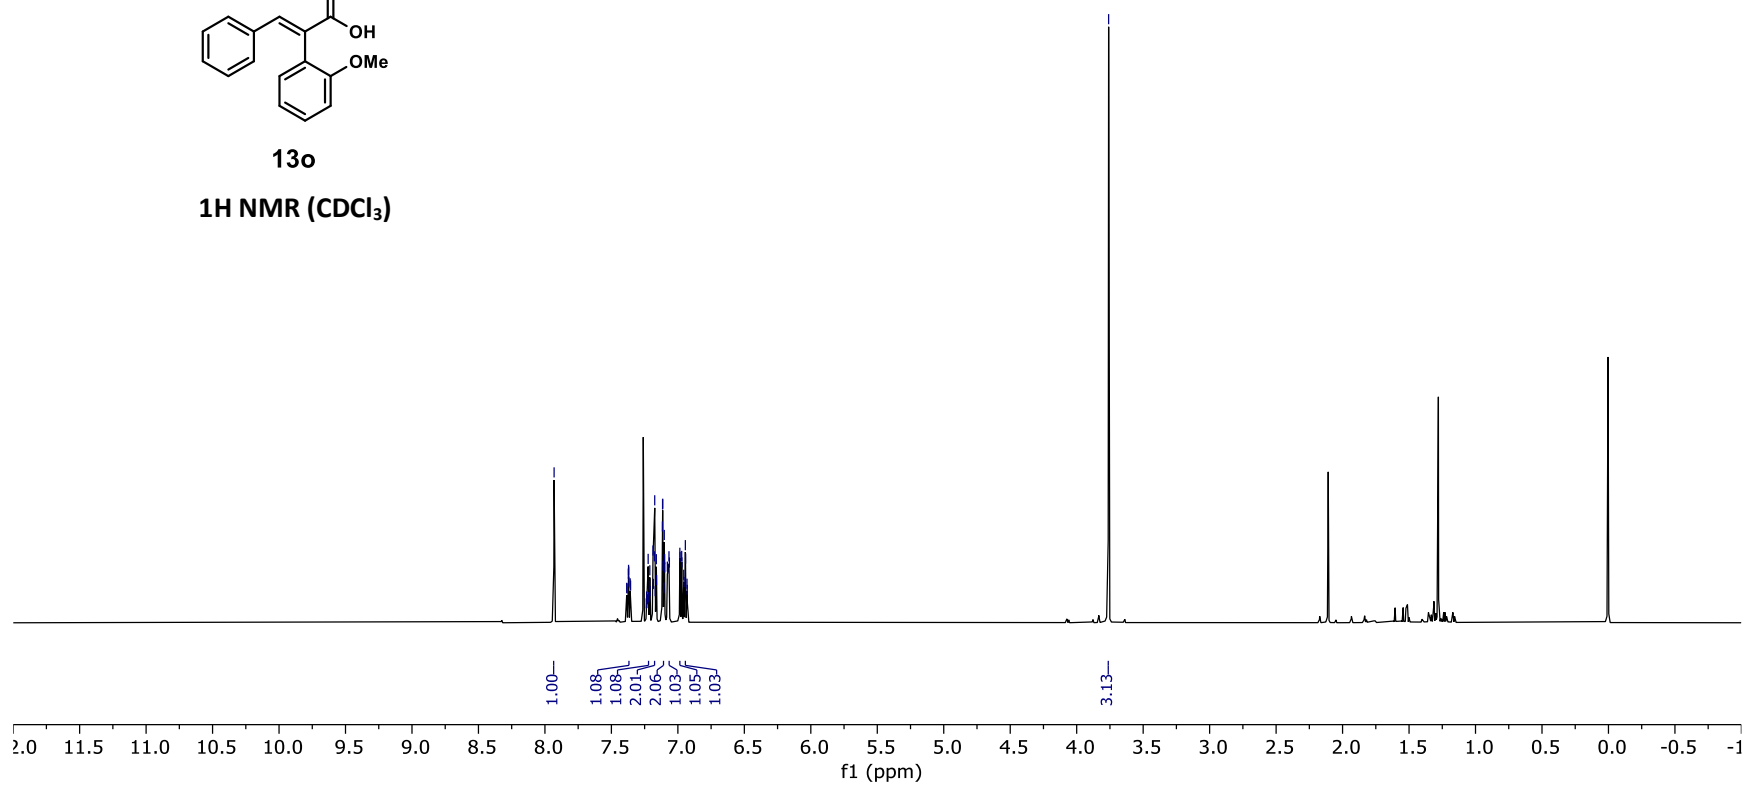

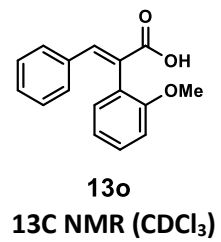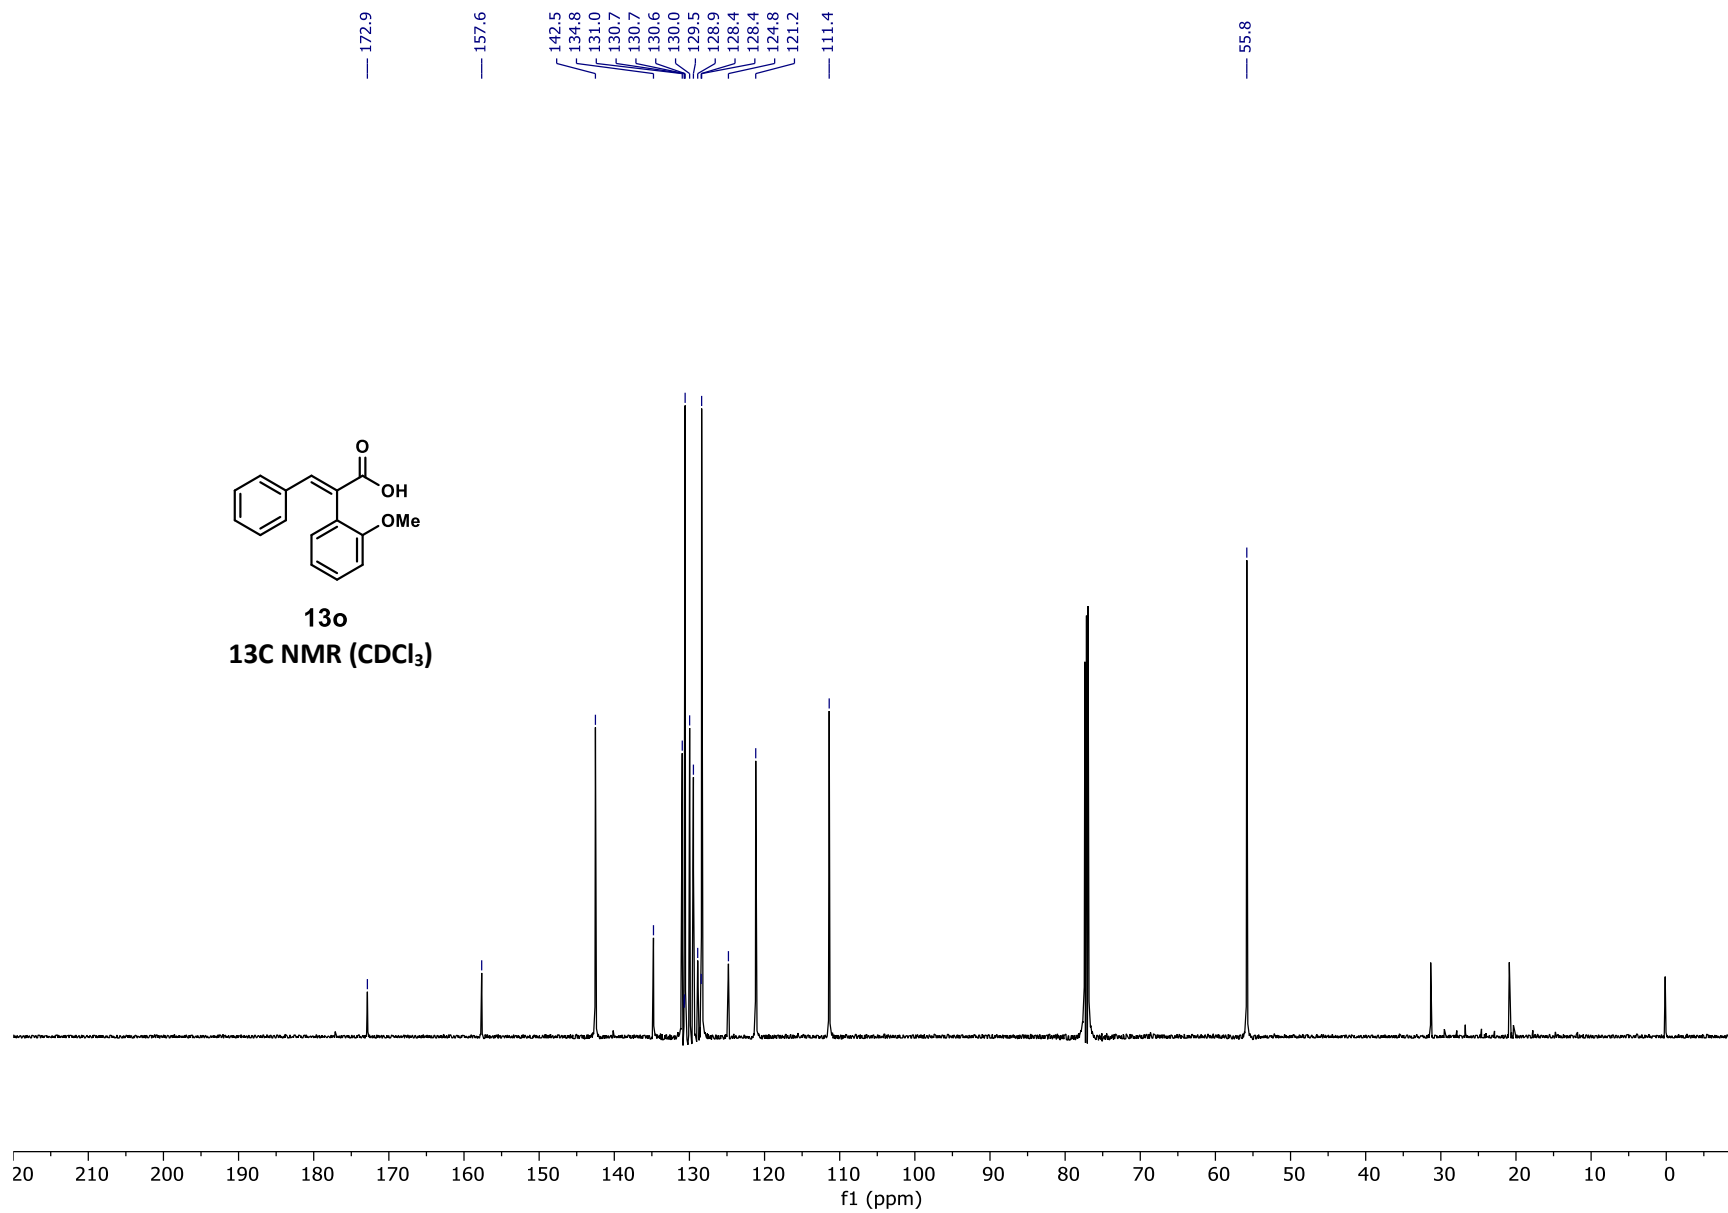

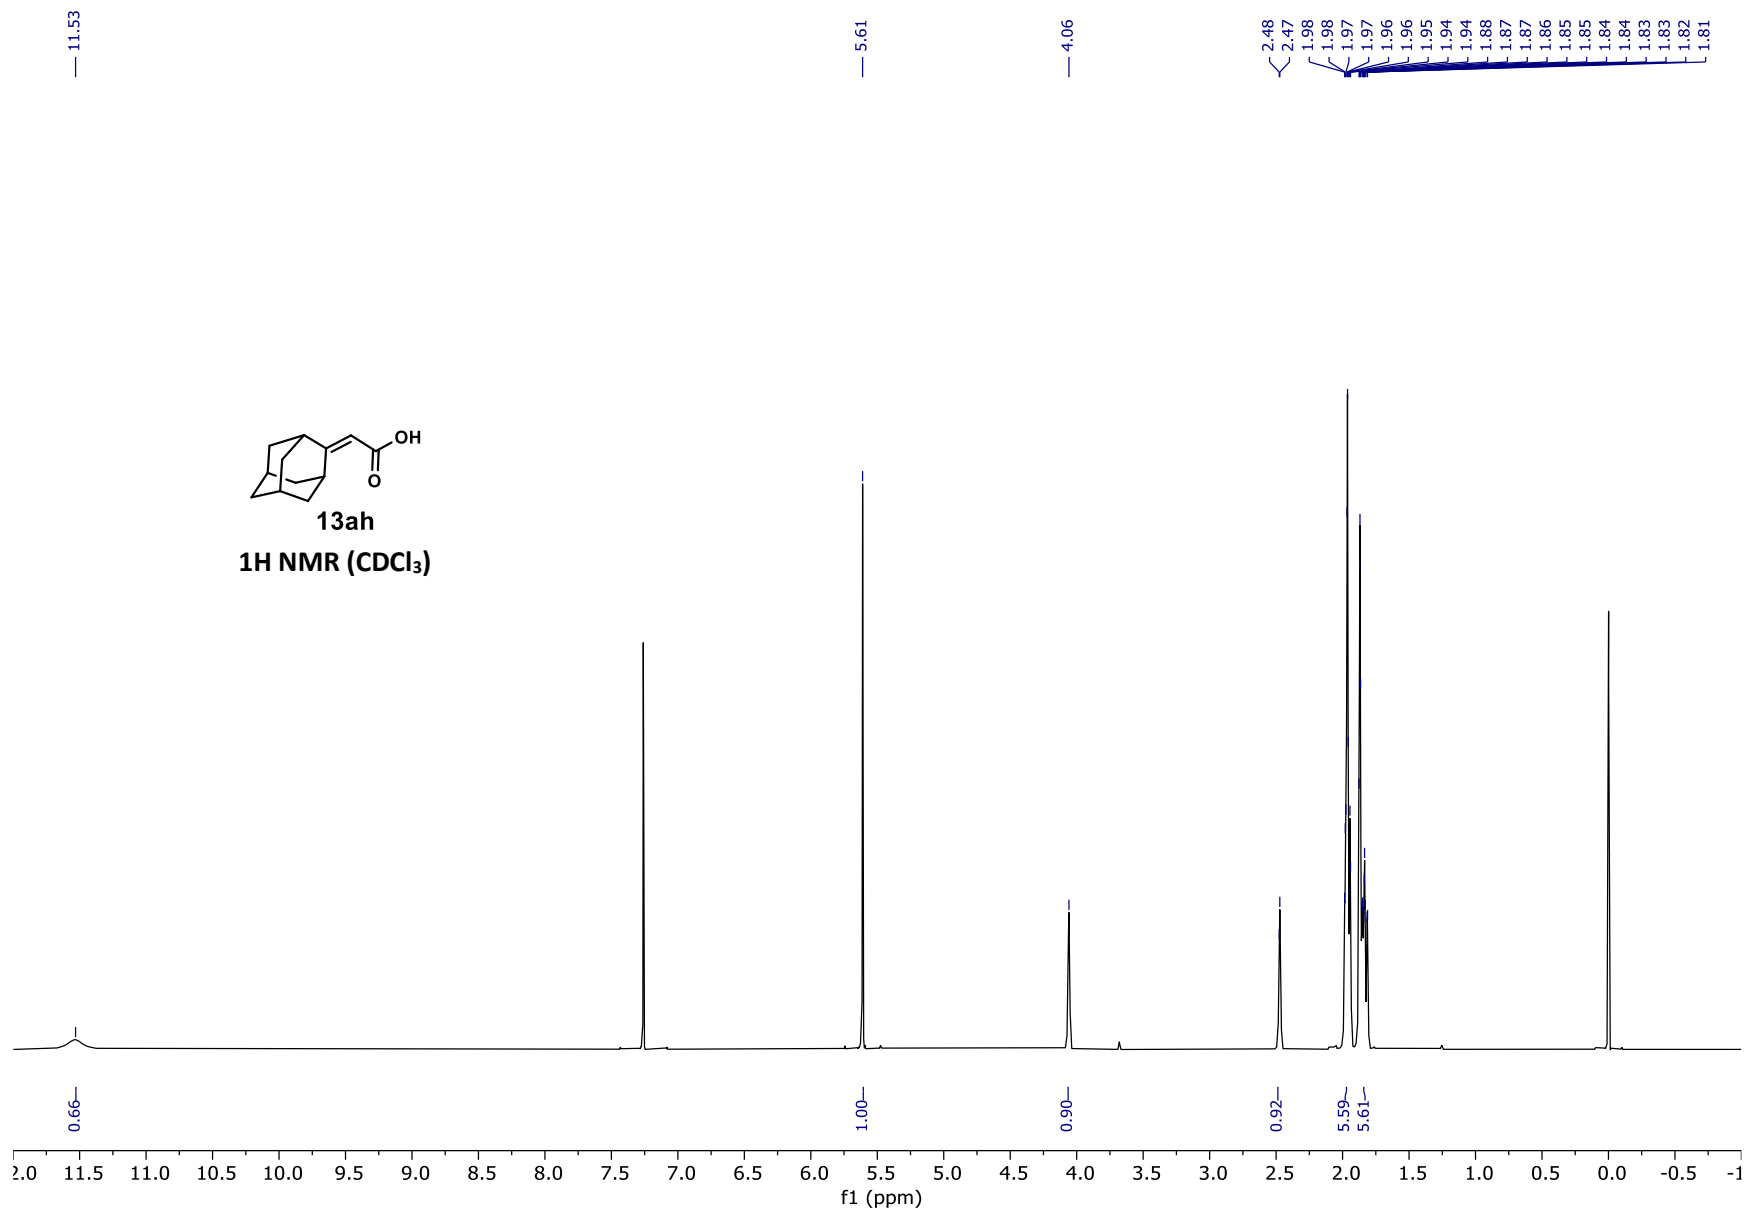

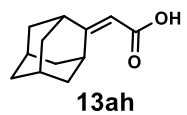

**<sup>13</sup>C NMR (CDCl<sub>3</sub>)**

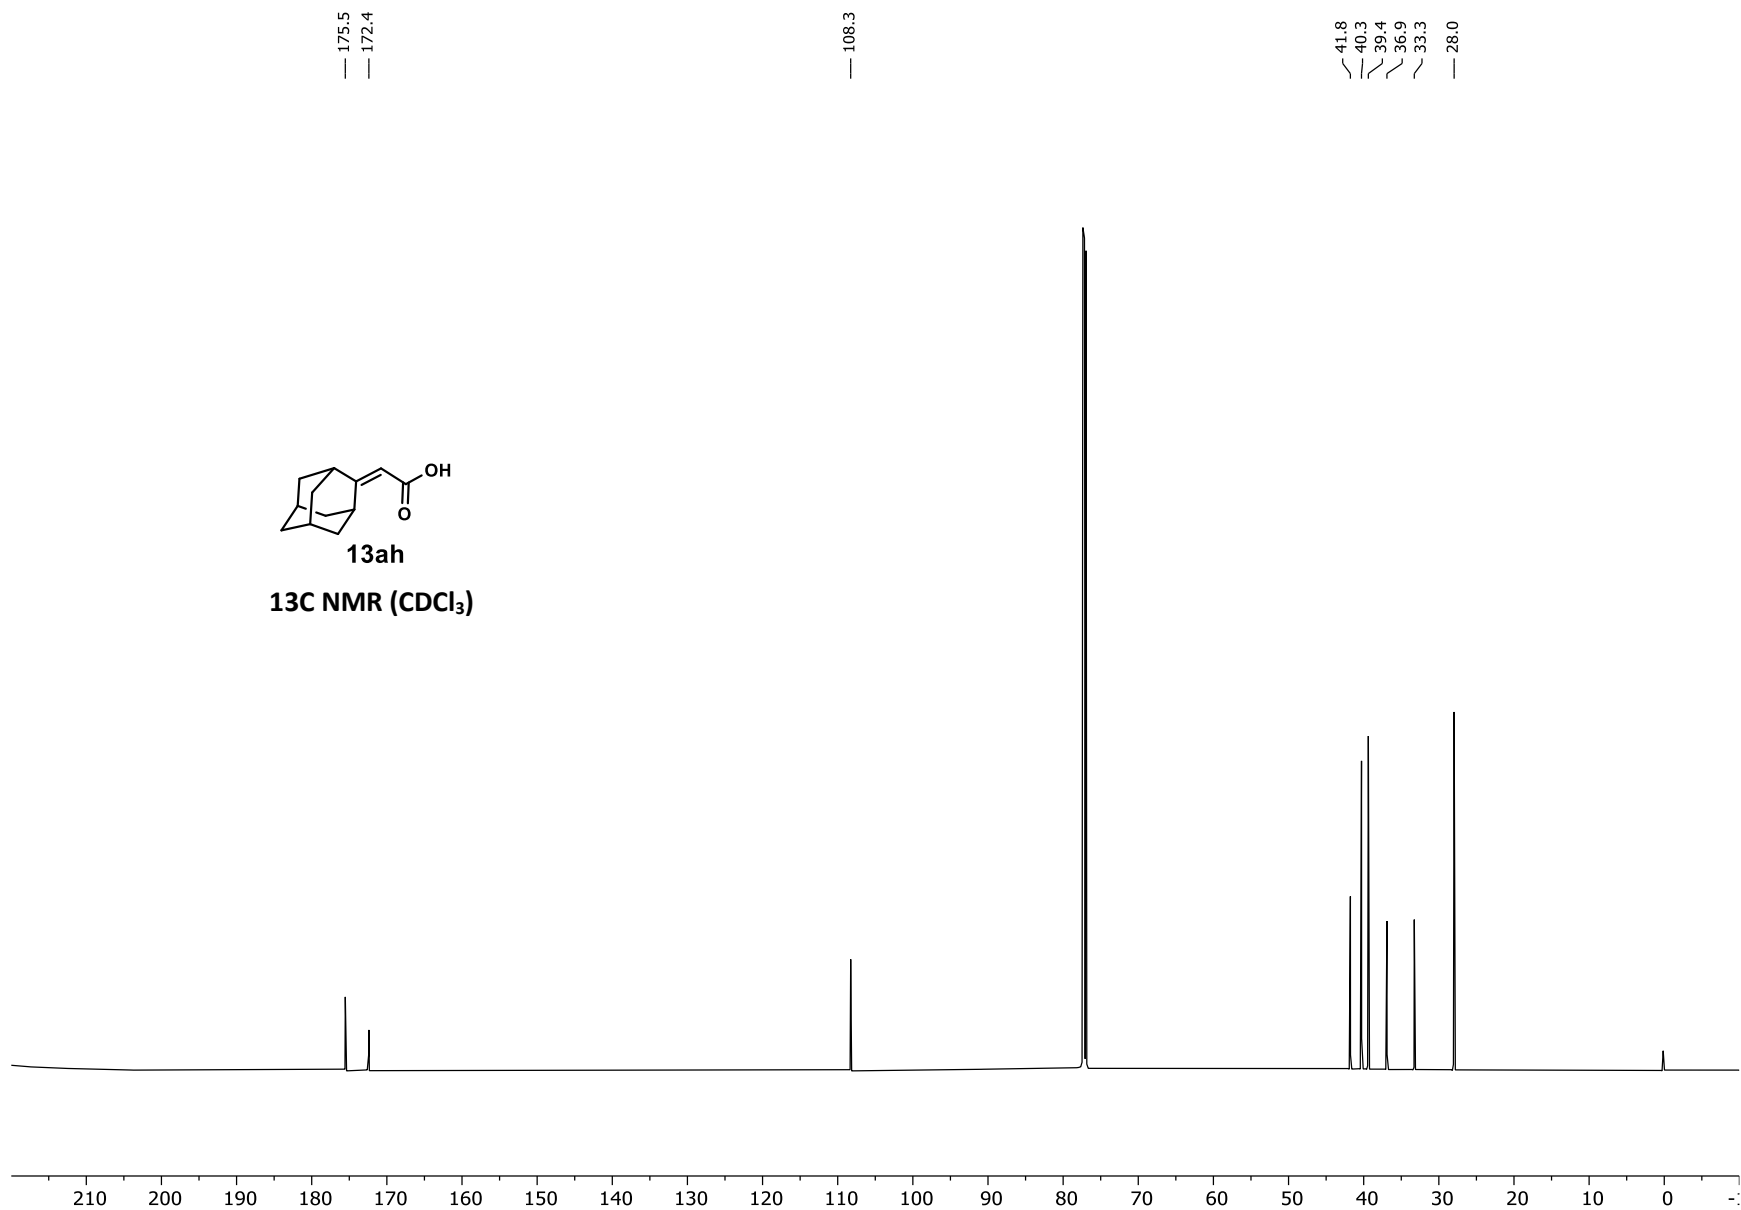

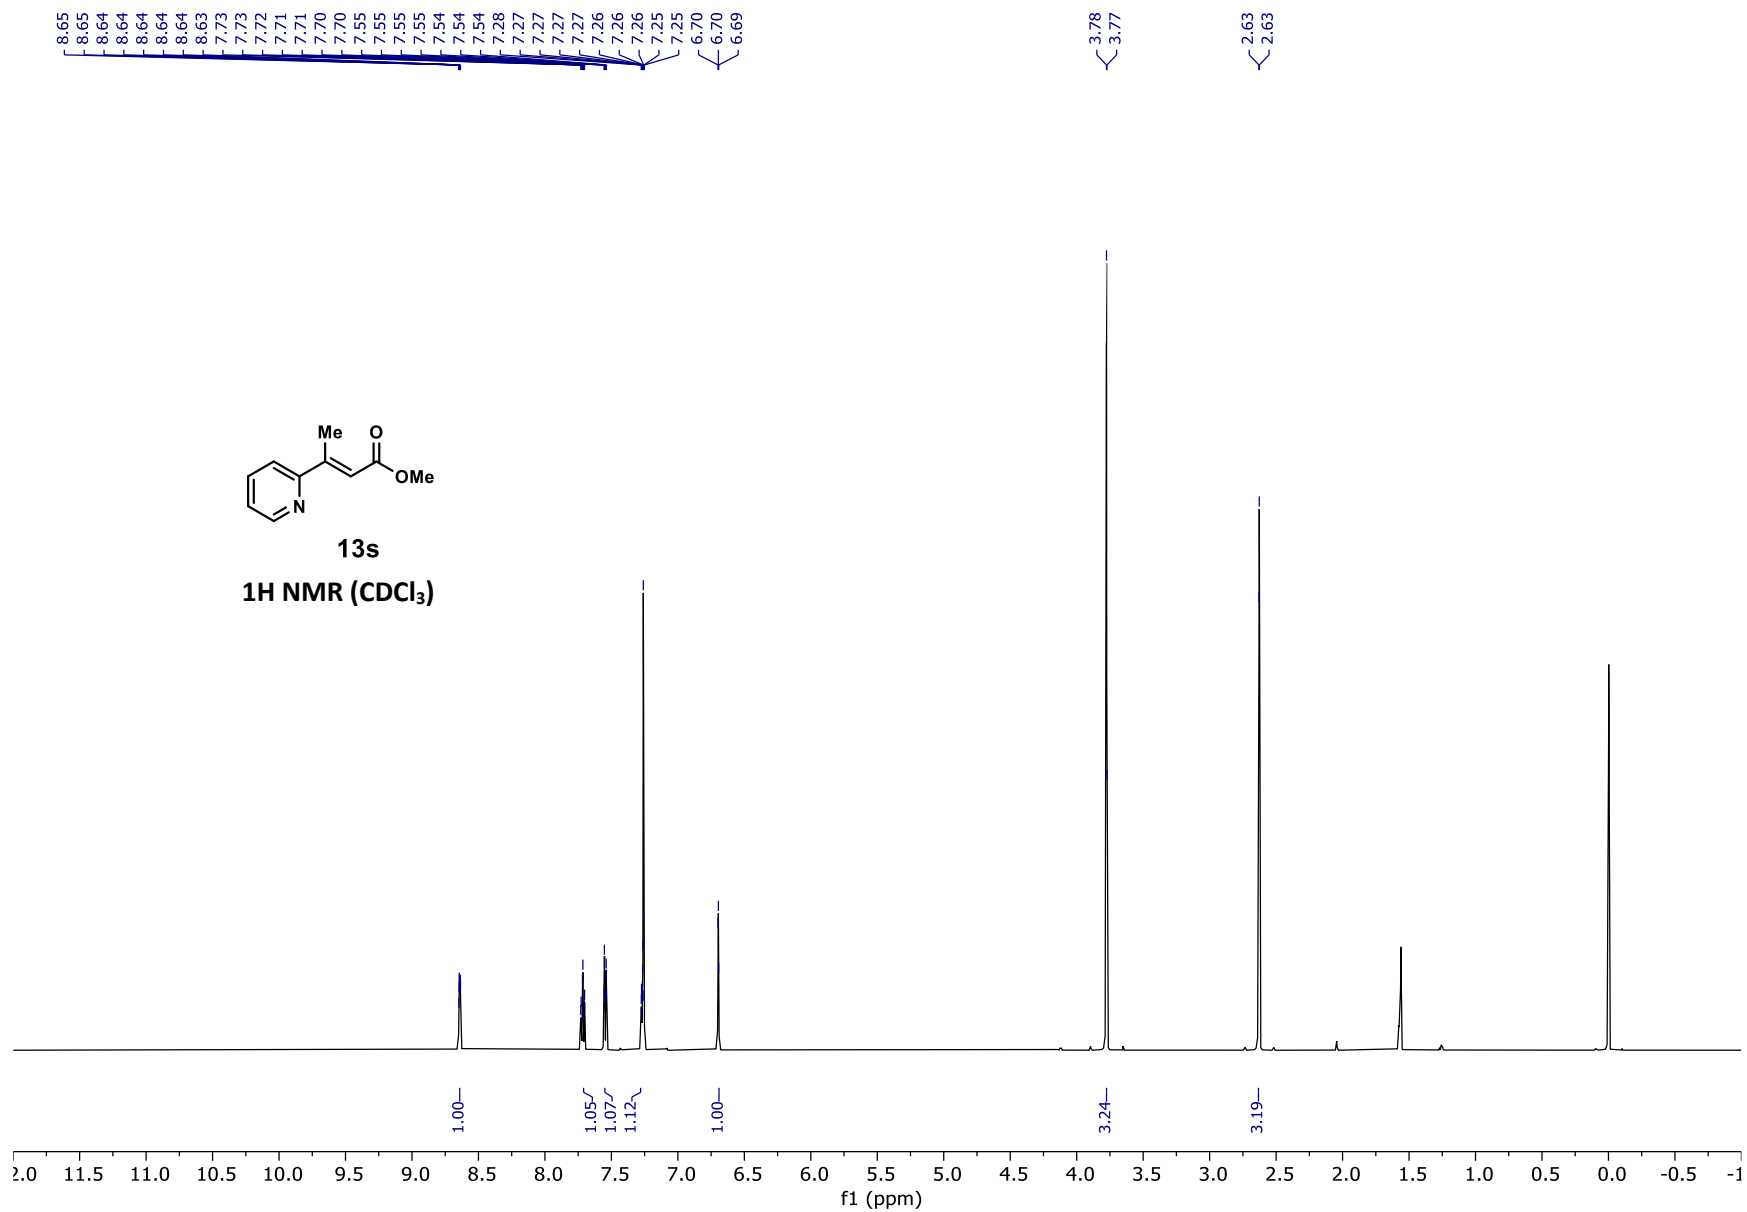

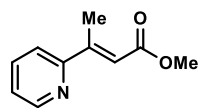

13s

13C NMR (CDCl<sub>3</sub>)

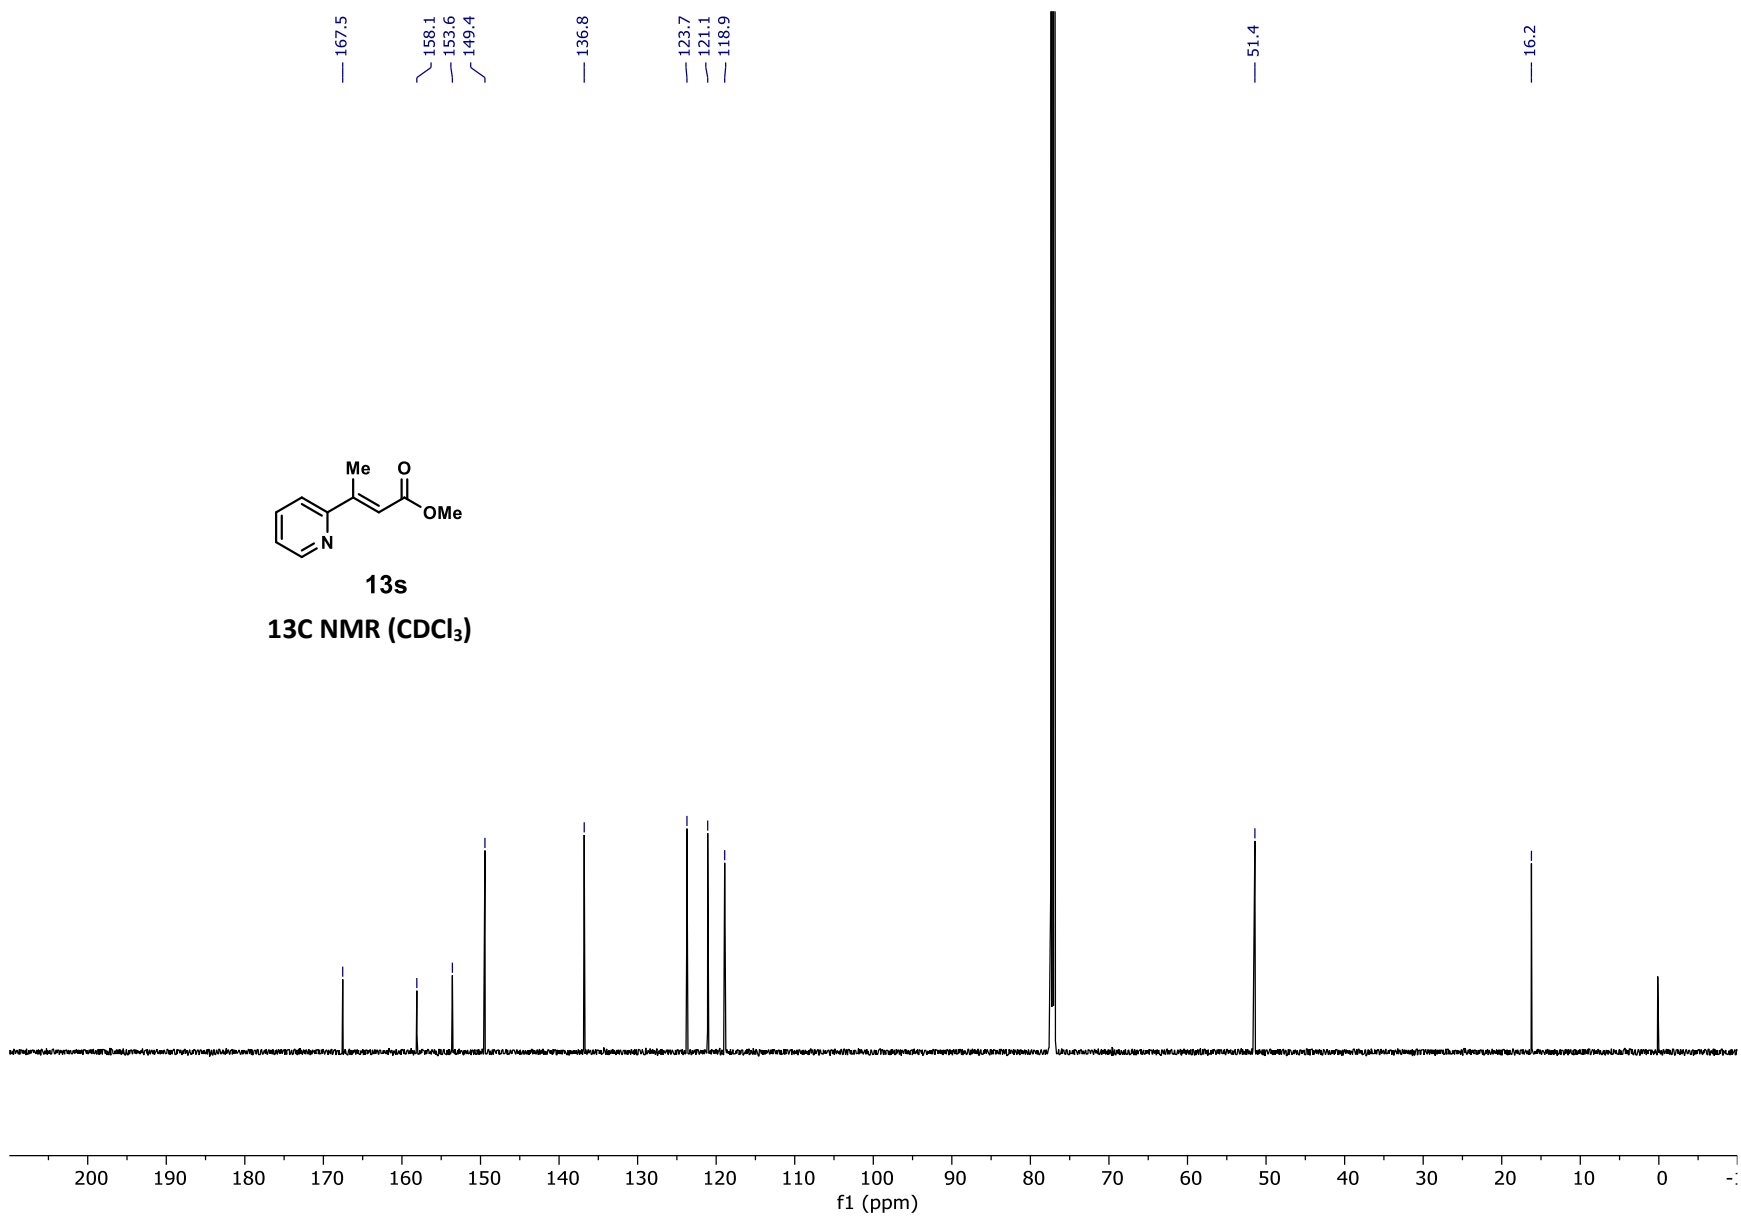

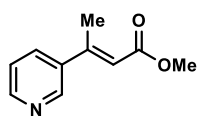

13t

1H NMR (CDCl<sub>3</sub>)

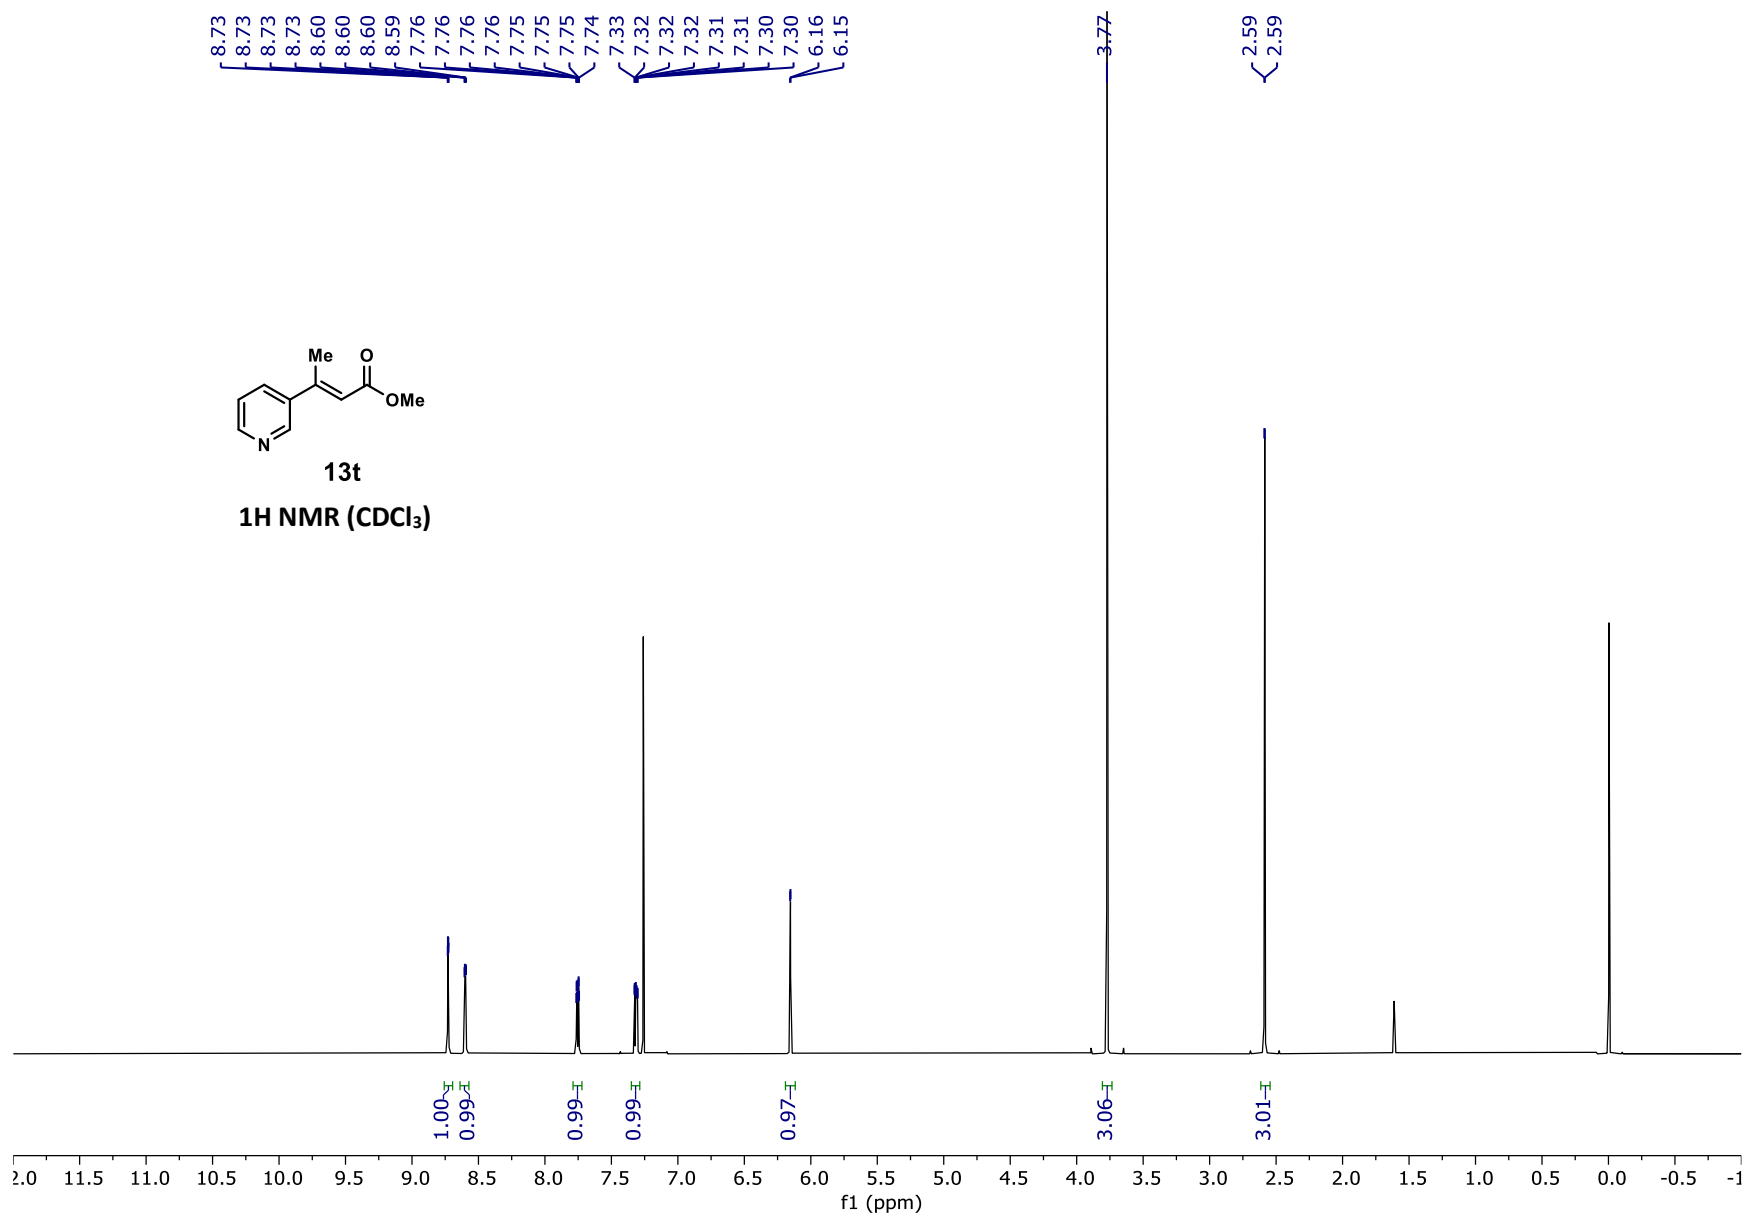

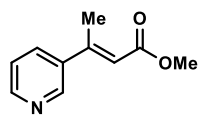

**13t**  
**<sup>13</sup>C NMR (CDCl<sub>3</sub>)**

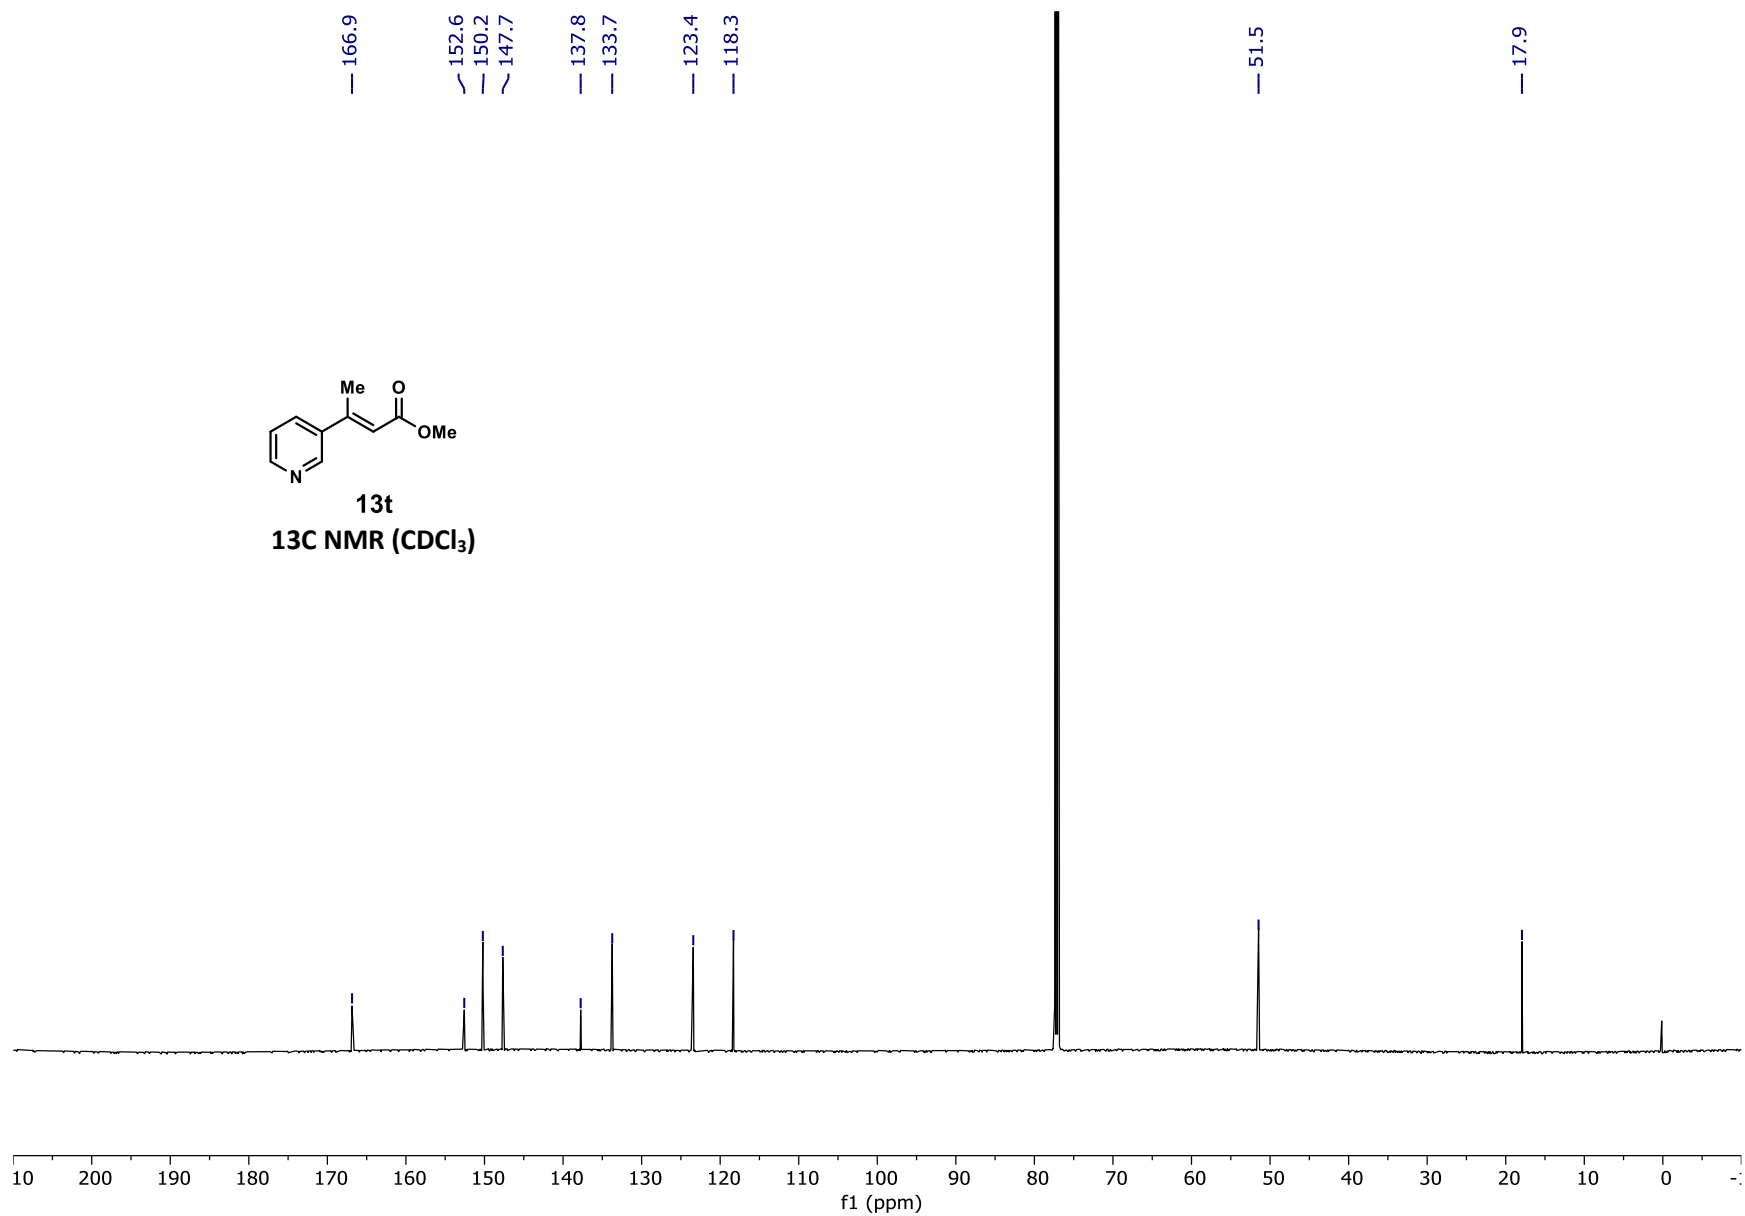



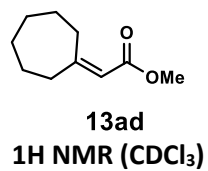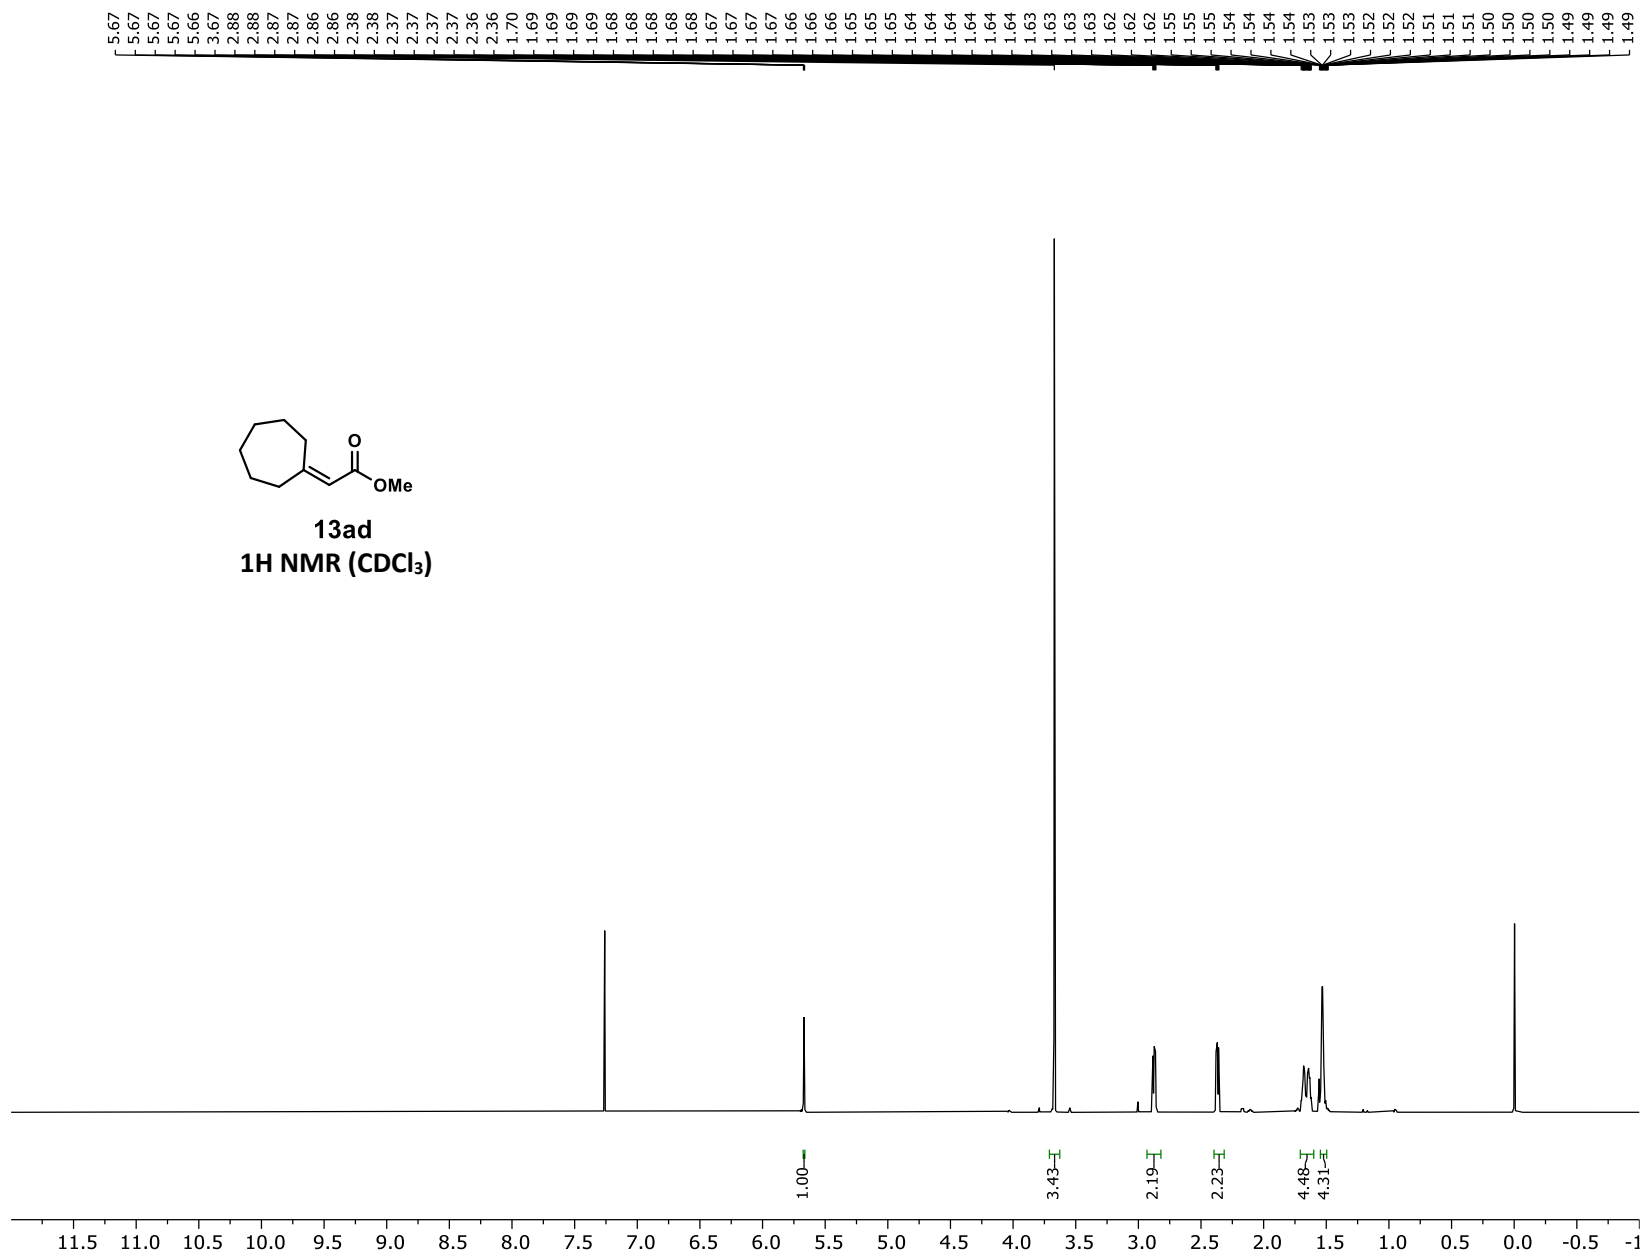

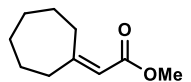

**13ad**  
**<sup>13</sup>C NMR (CDCl<sub>3</sub>)**

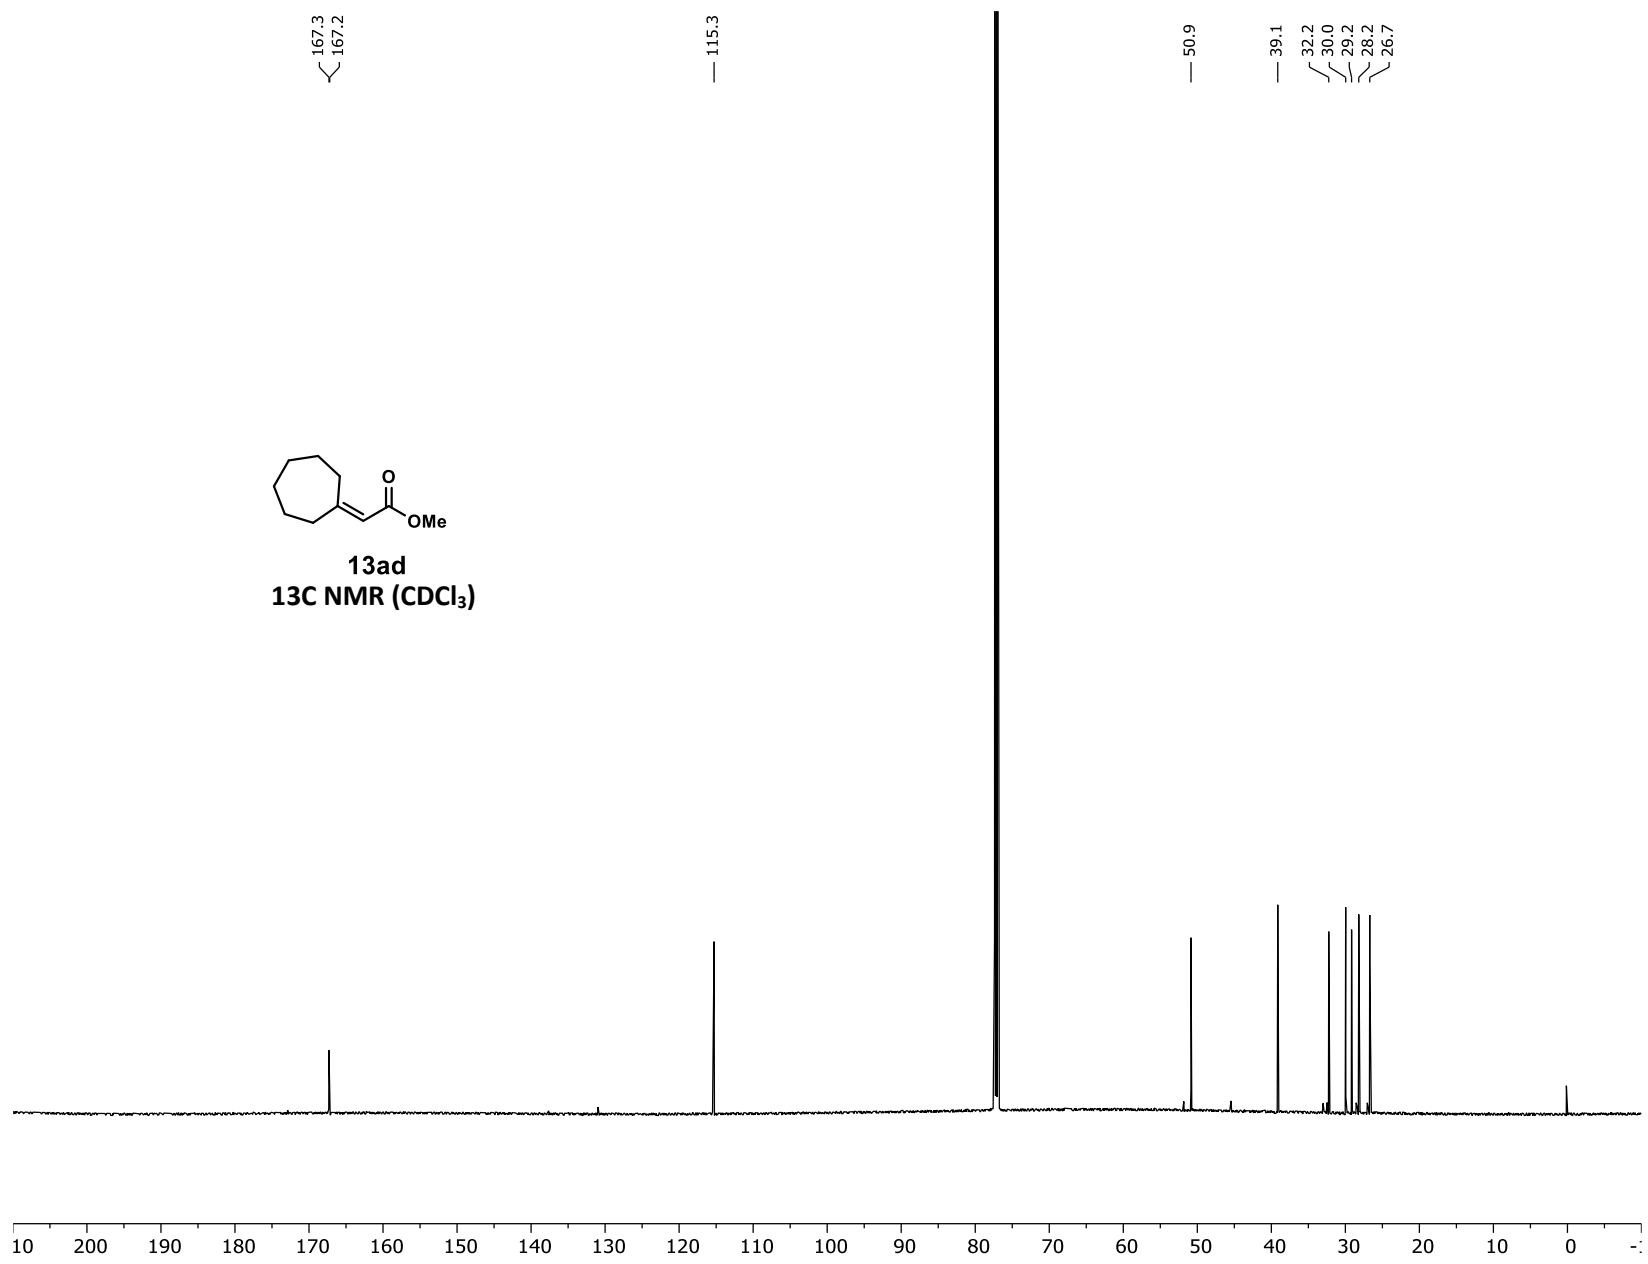

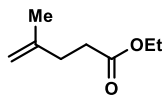

13ak

<sup>1</sup>H NMR (CDCl<sub>3</sub>)

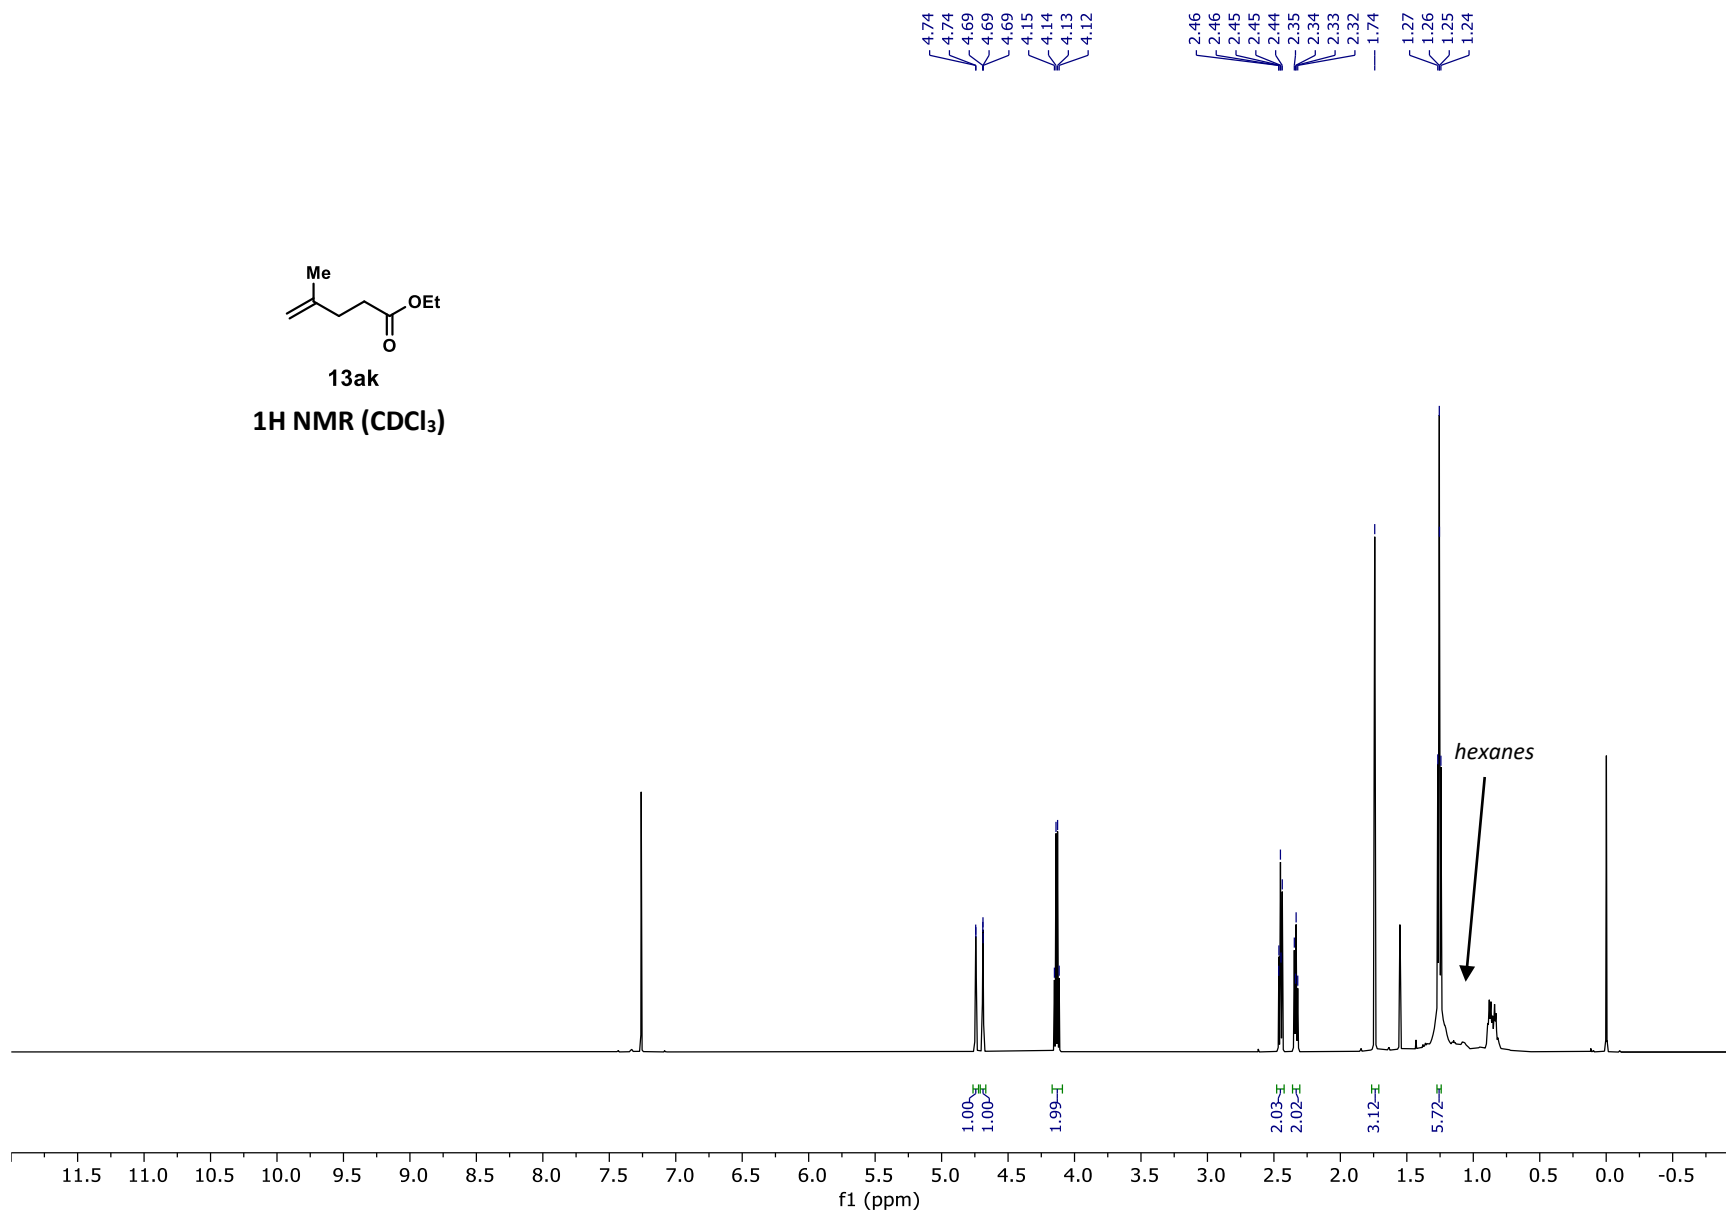

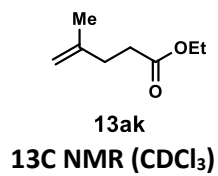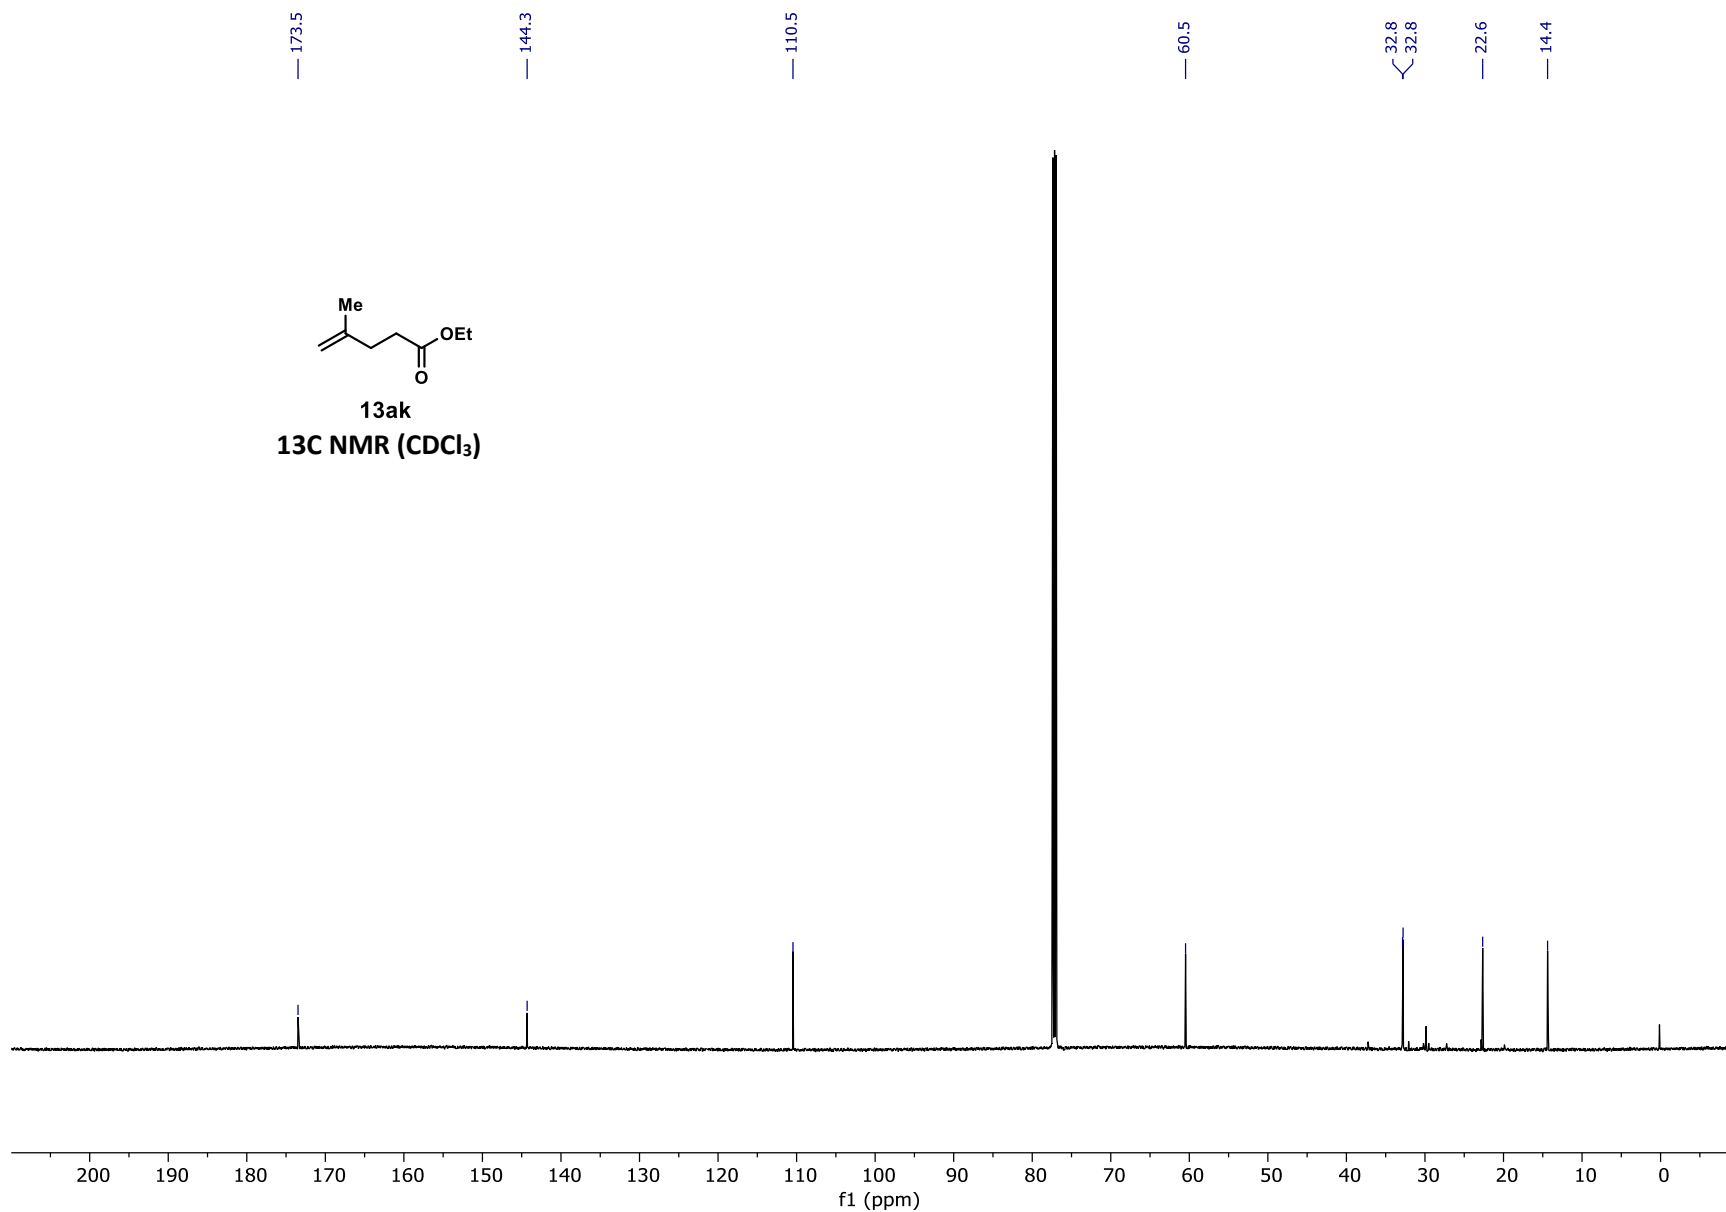

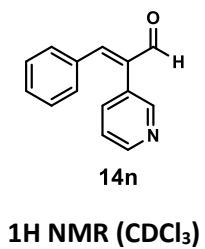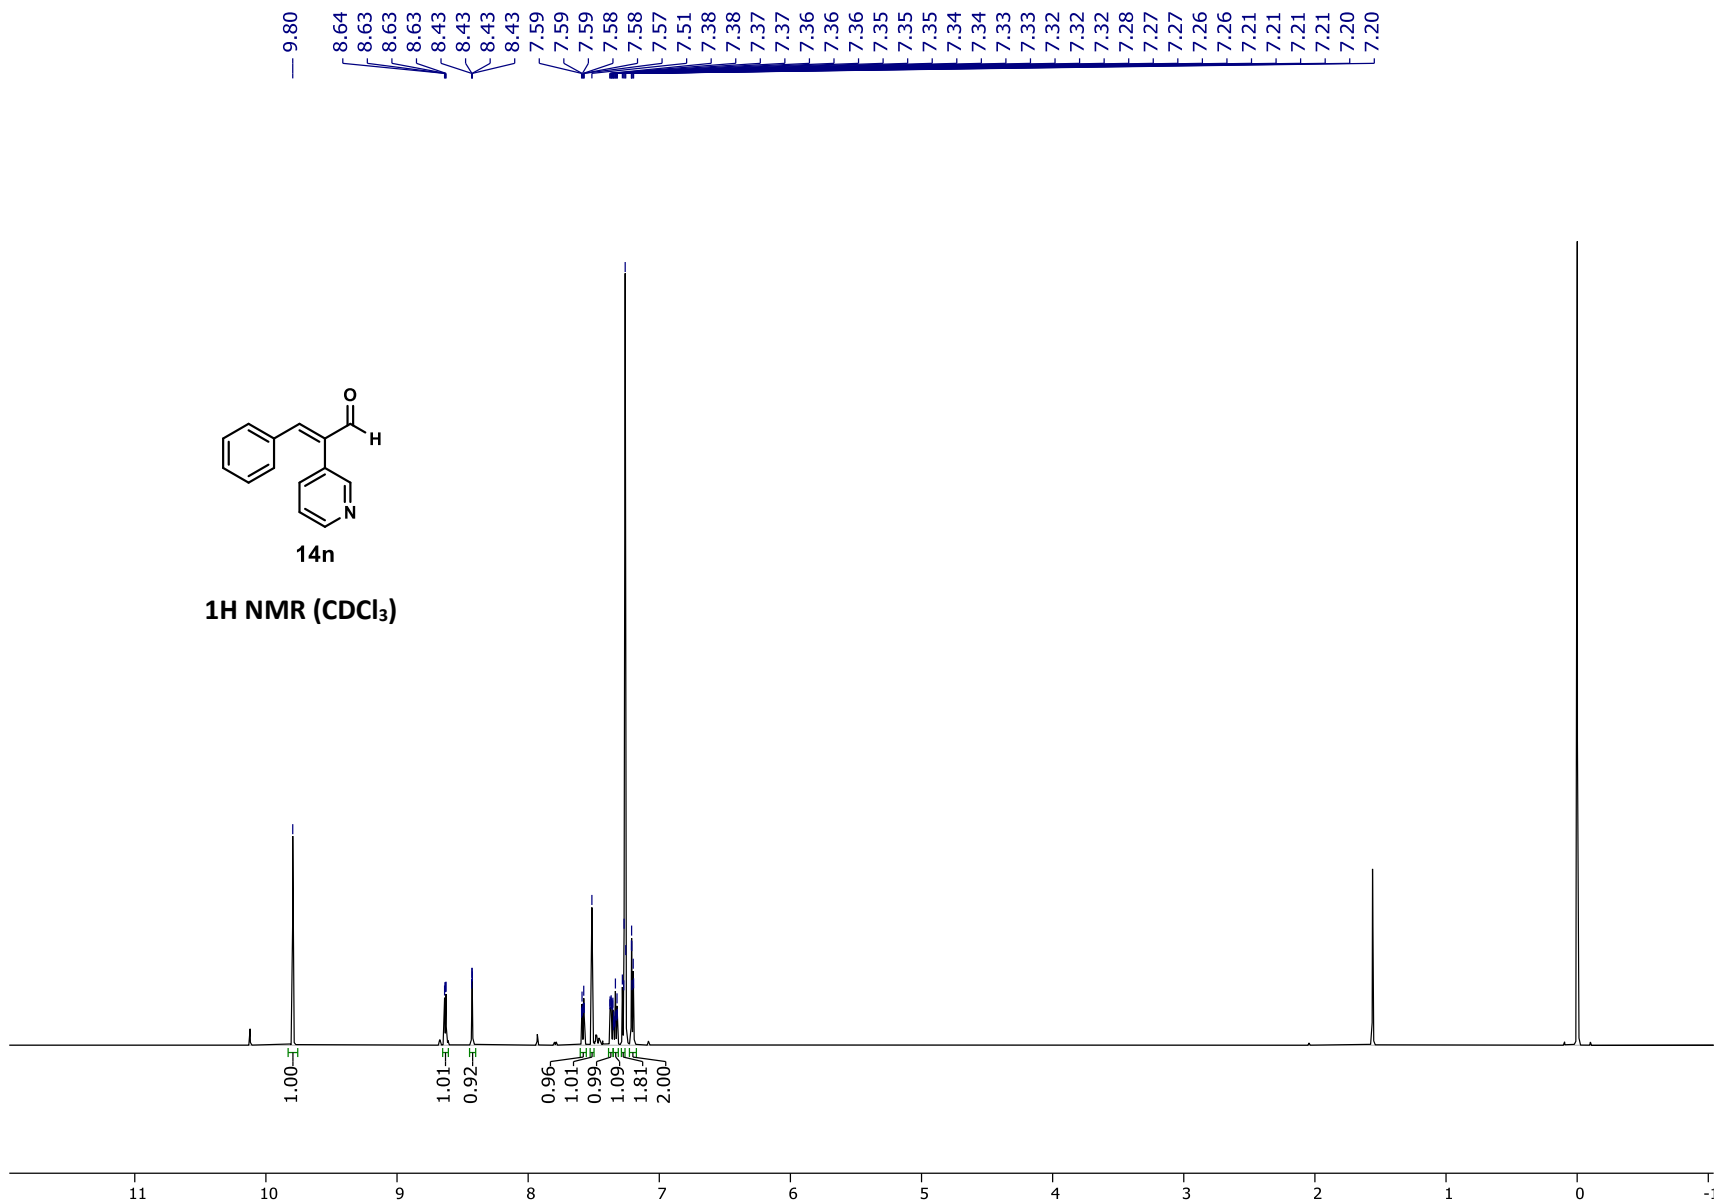

— 193.3

151.9  
150.4  
149.6  
148.4  
137.5  
133.6  
130.8  
130.8  
129.0  
128.9  
123.7

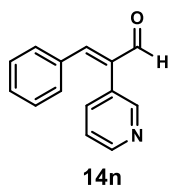

**<sup>13</sup>C NMR (CDCl<sub>3</sub>)**

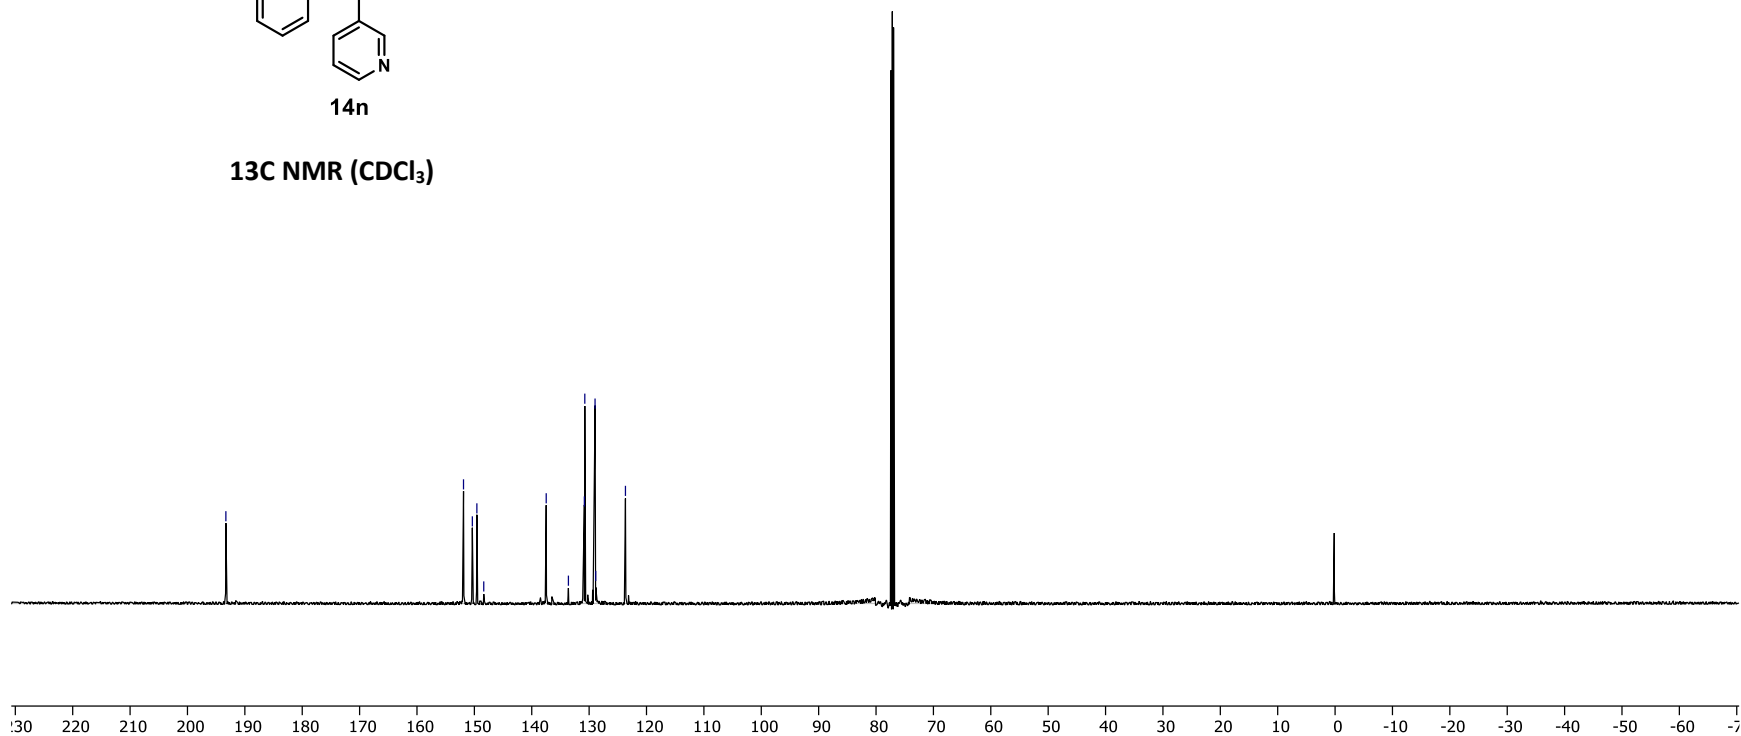

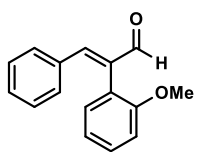

**14o**

**<sup>1</sup>H NMR (CDCl<sub>3</sub>)**

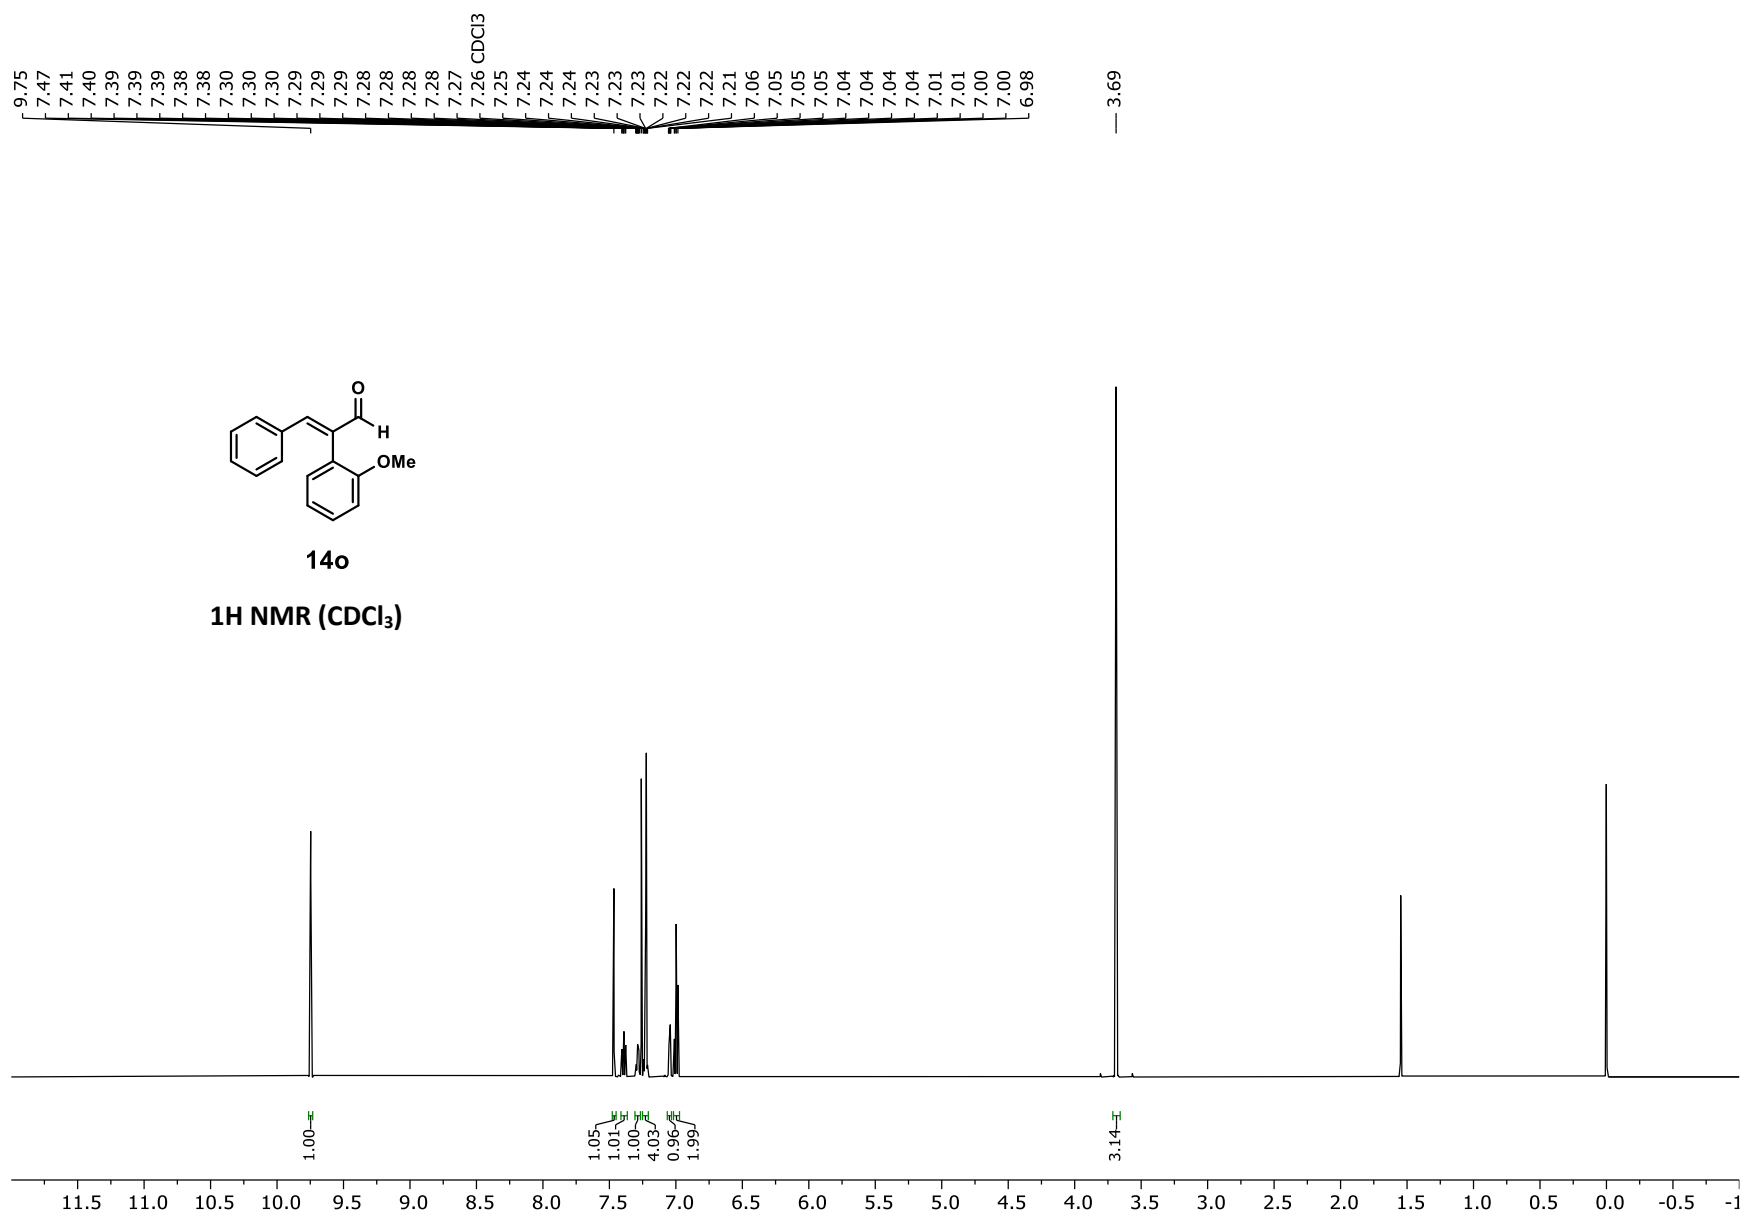

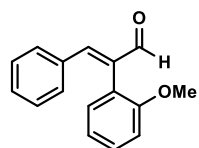

**14o**

**<sup>13</sup>C NMR (CDCl<sub>3</sub>)**

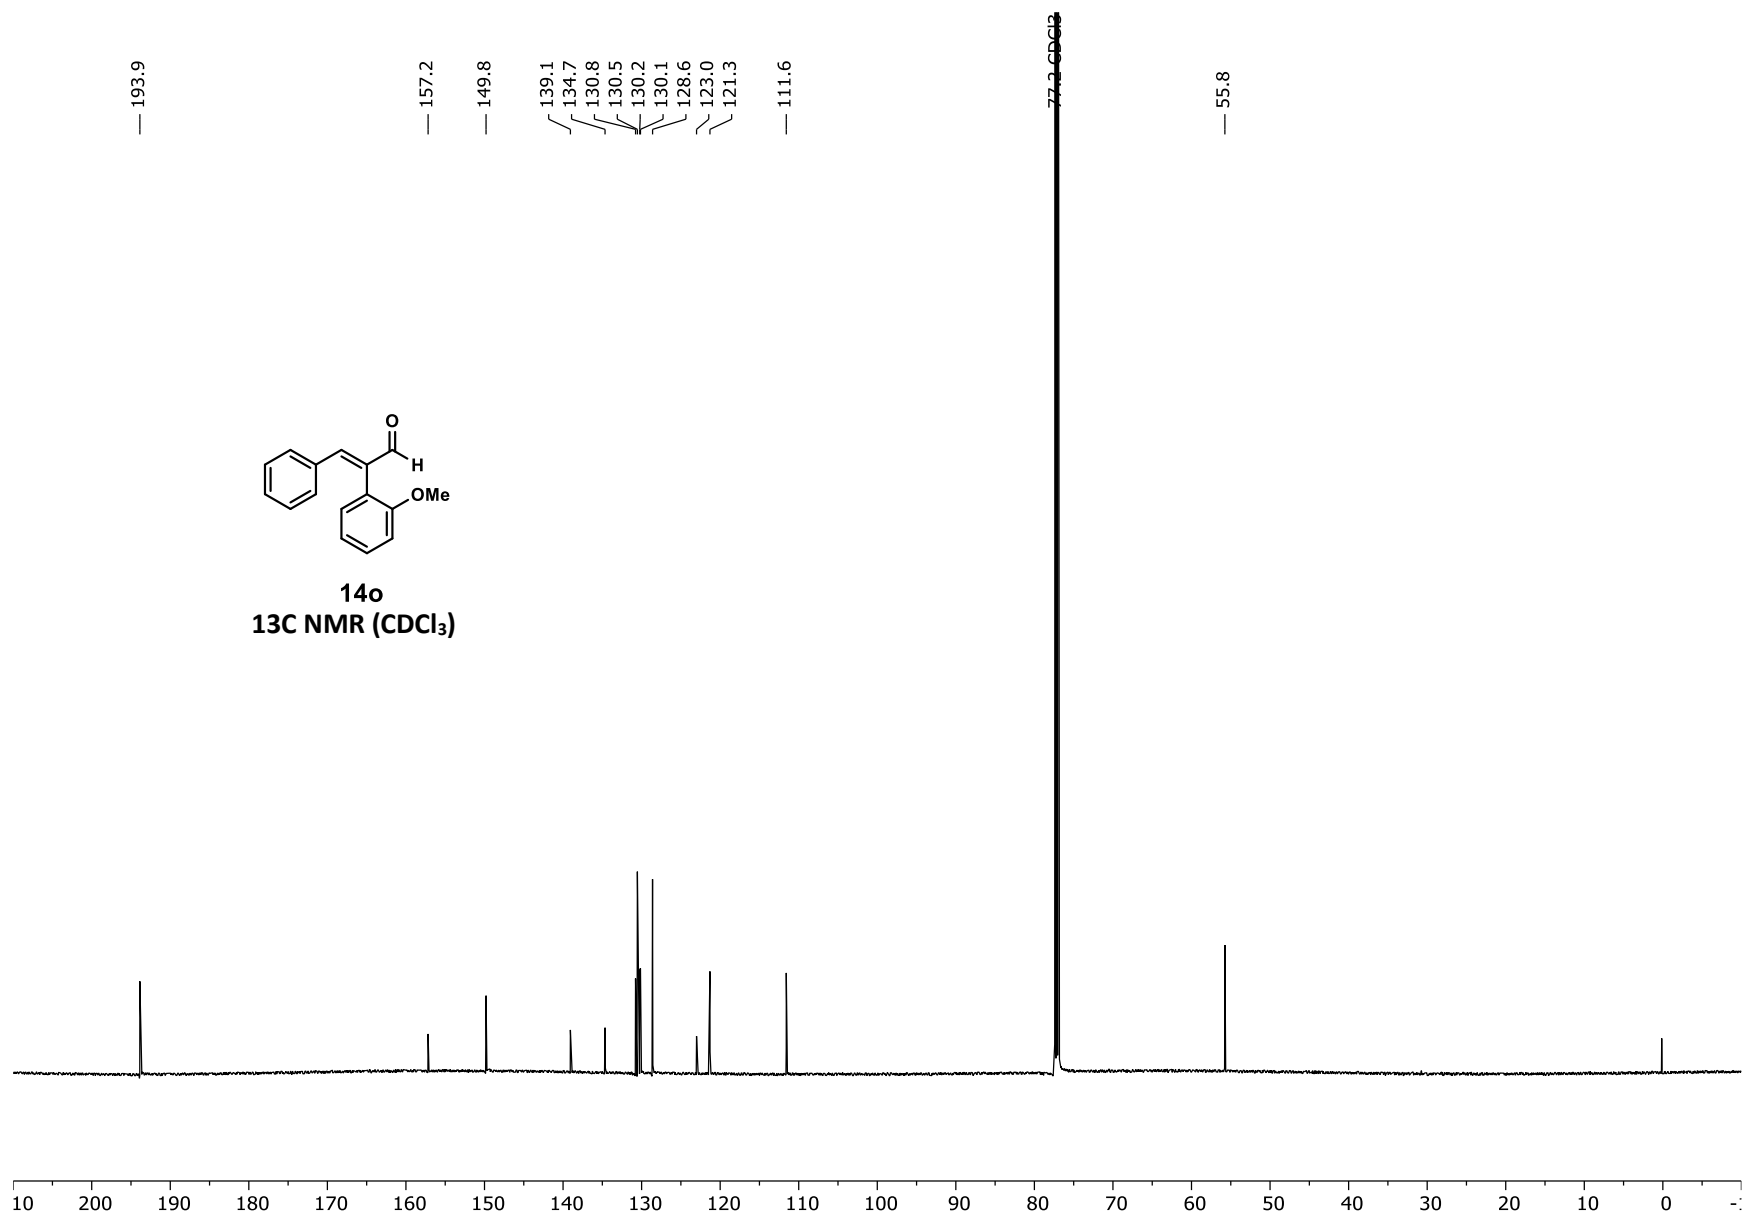



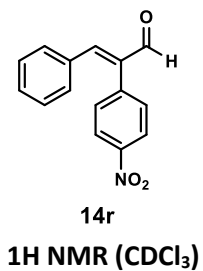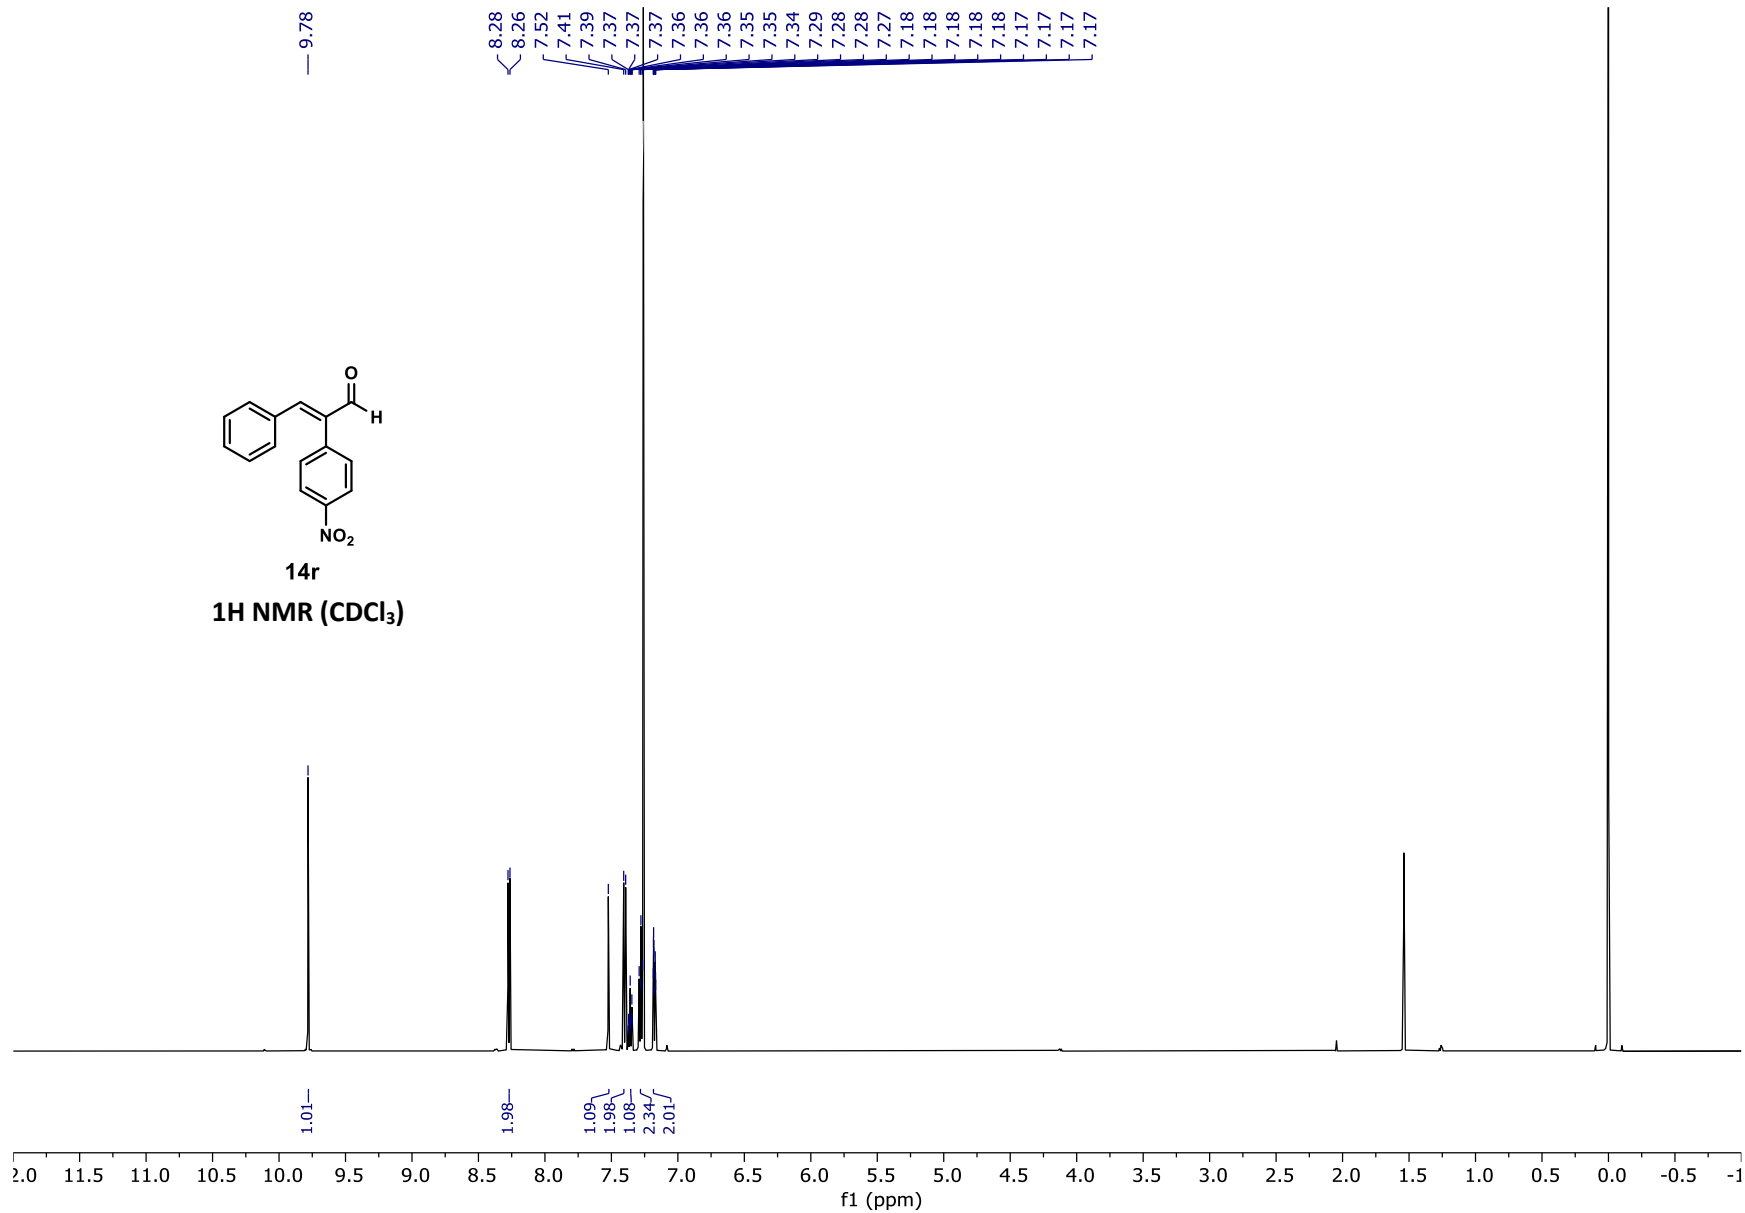

— 192.7

— 151.9

— 147.9

— 140.5

— 139.9

— 133.3

— 131.1

— 130.9

— 130.8

— 129.0

— 124.1

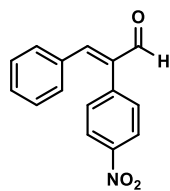

14r

**<sup>13</sup>C NMR (CDCl<sub>3</sub>)**

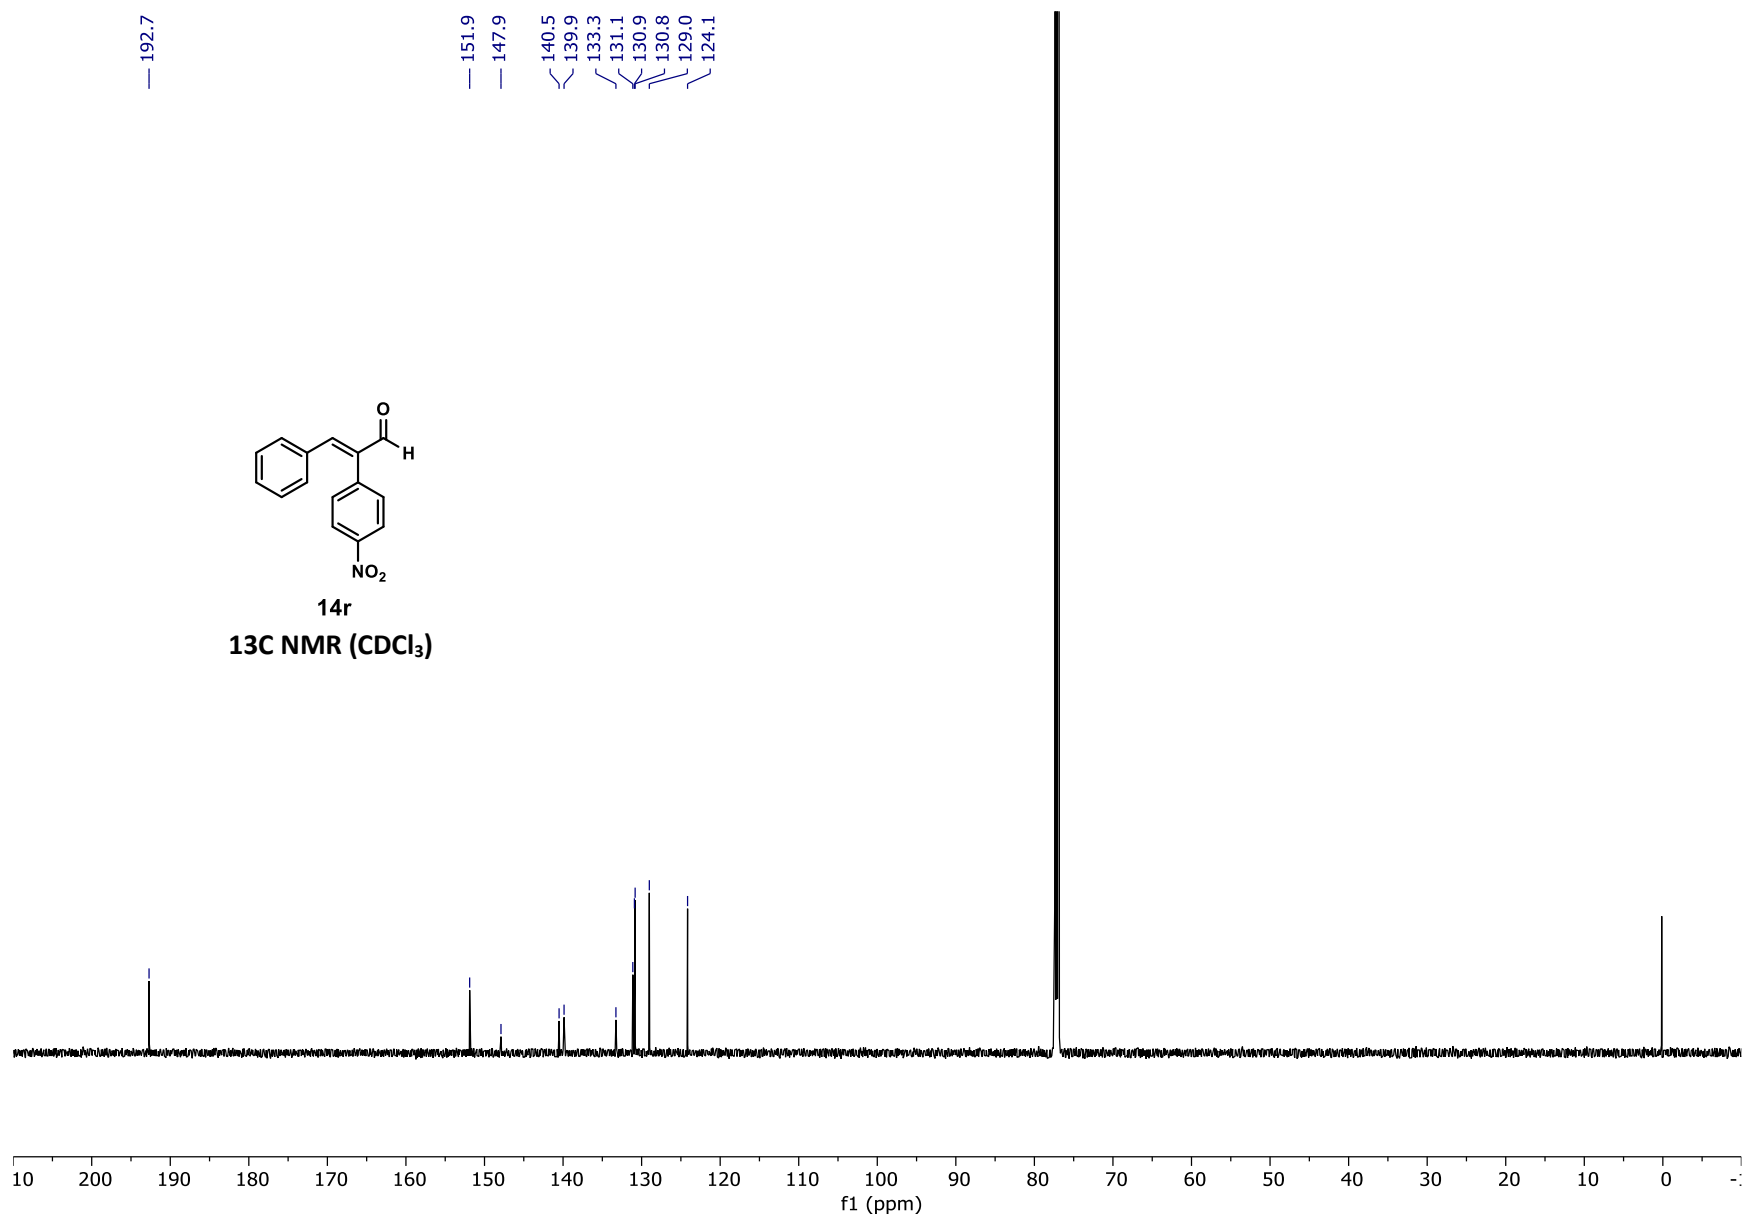

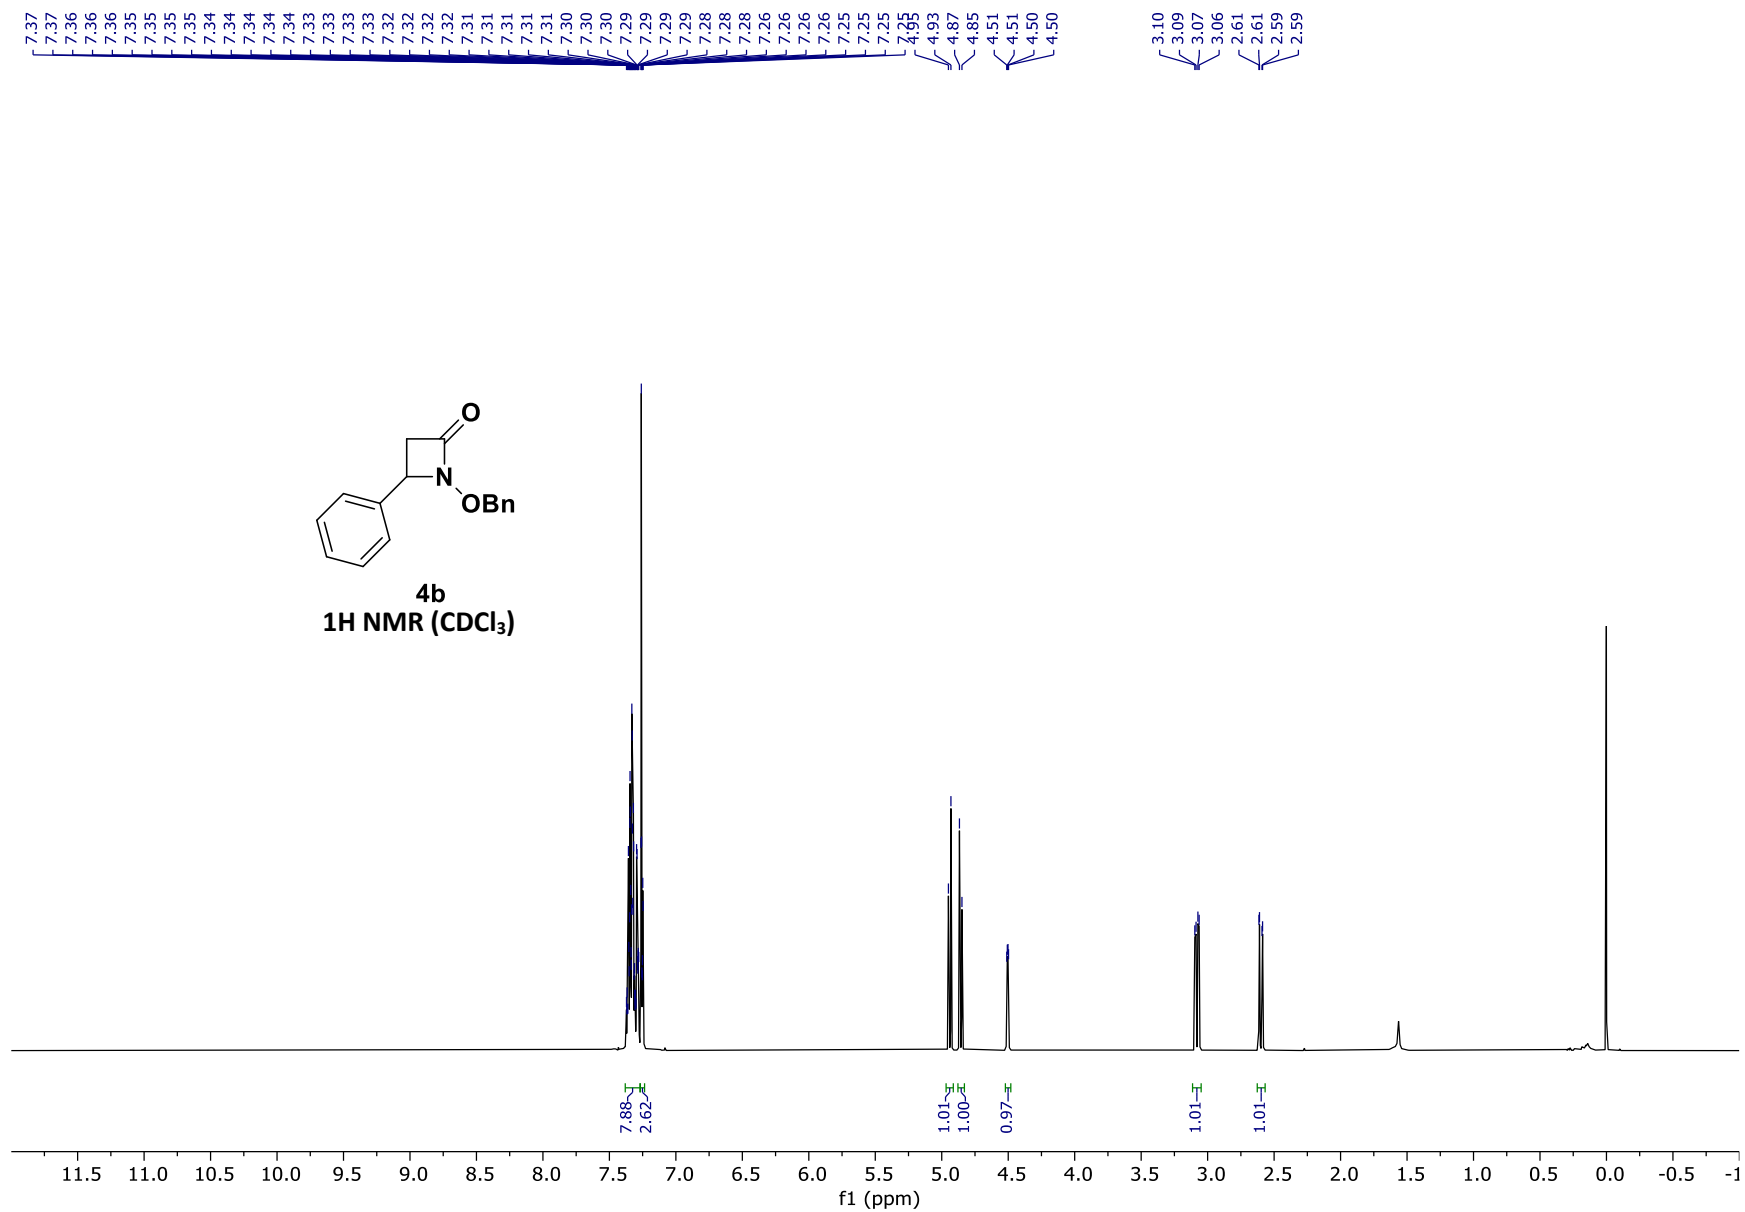

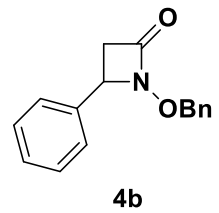

**<sup>13</sup>C NMR (CDCl<sub>3</sub>)**

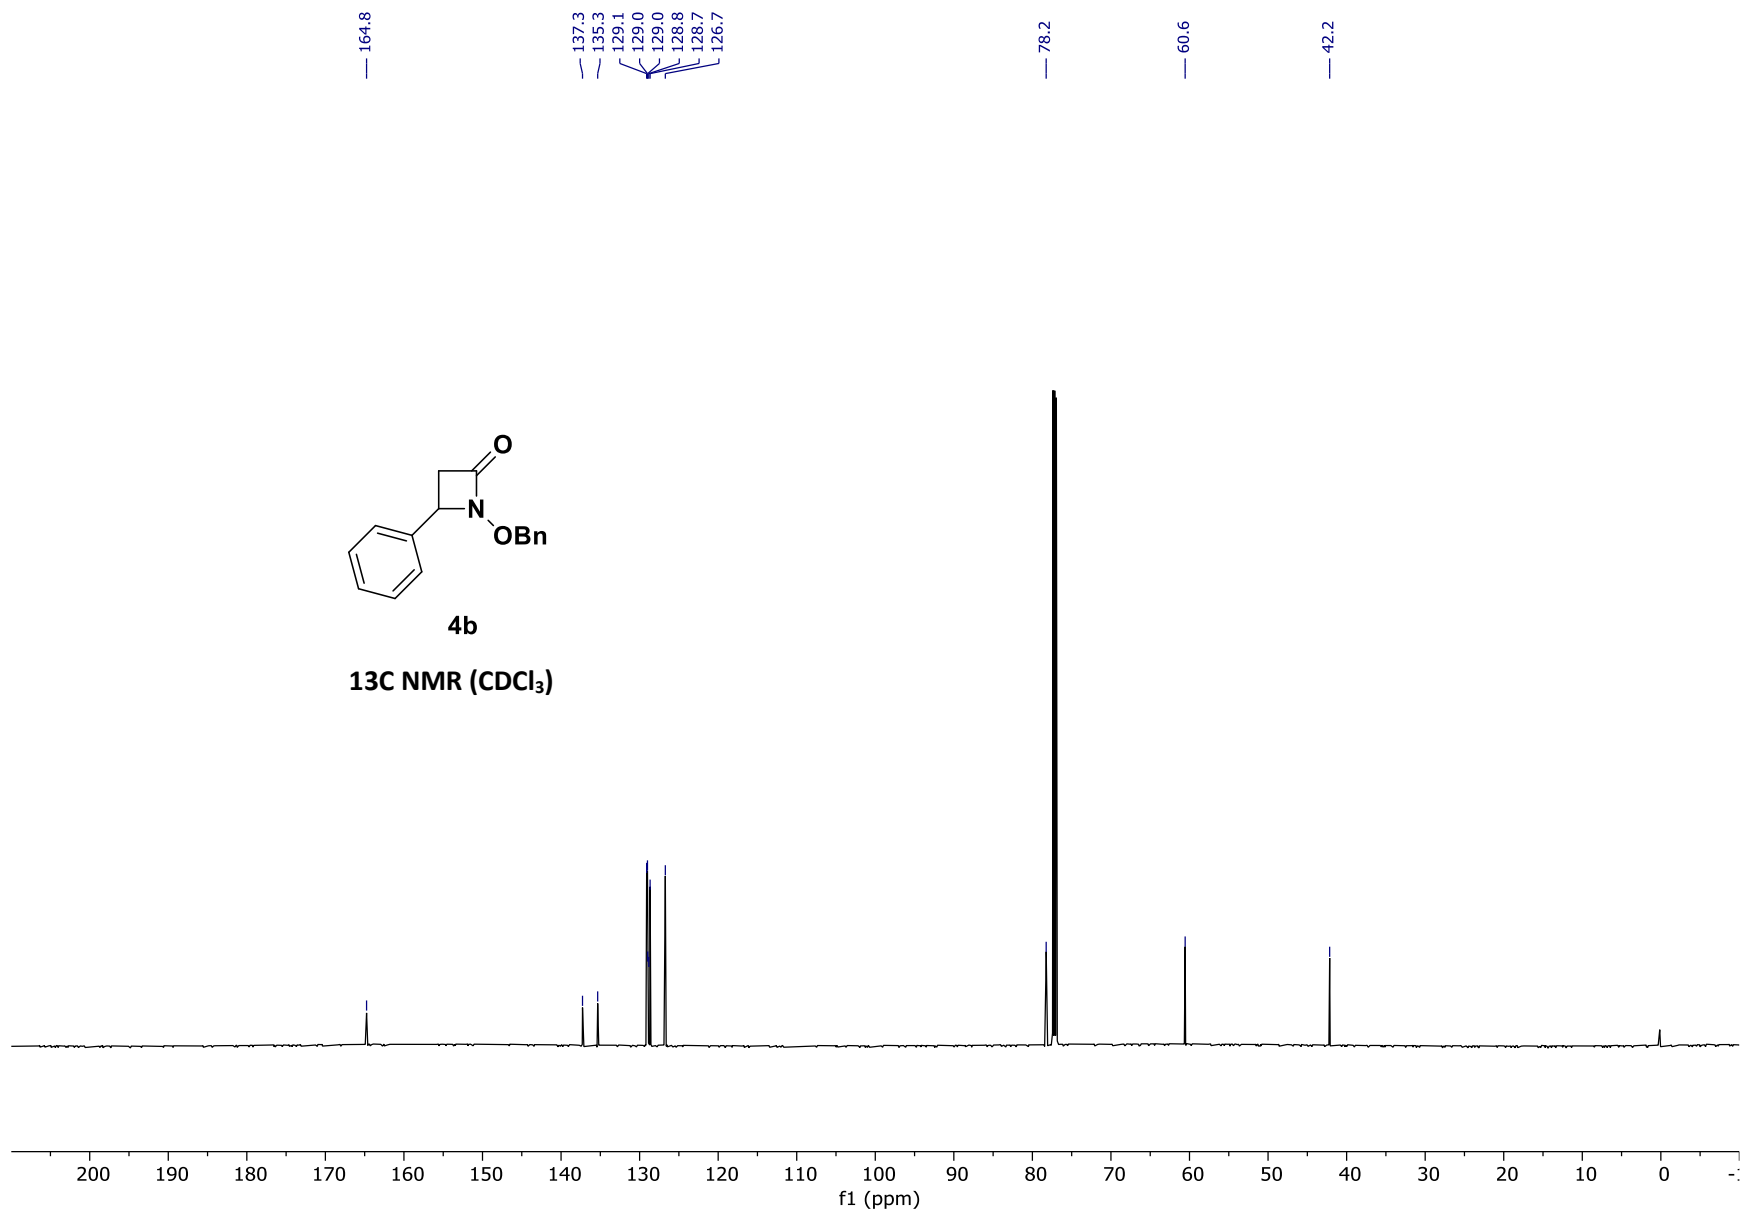

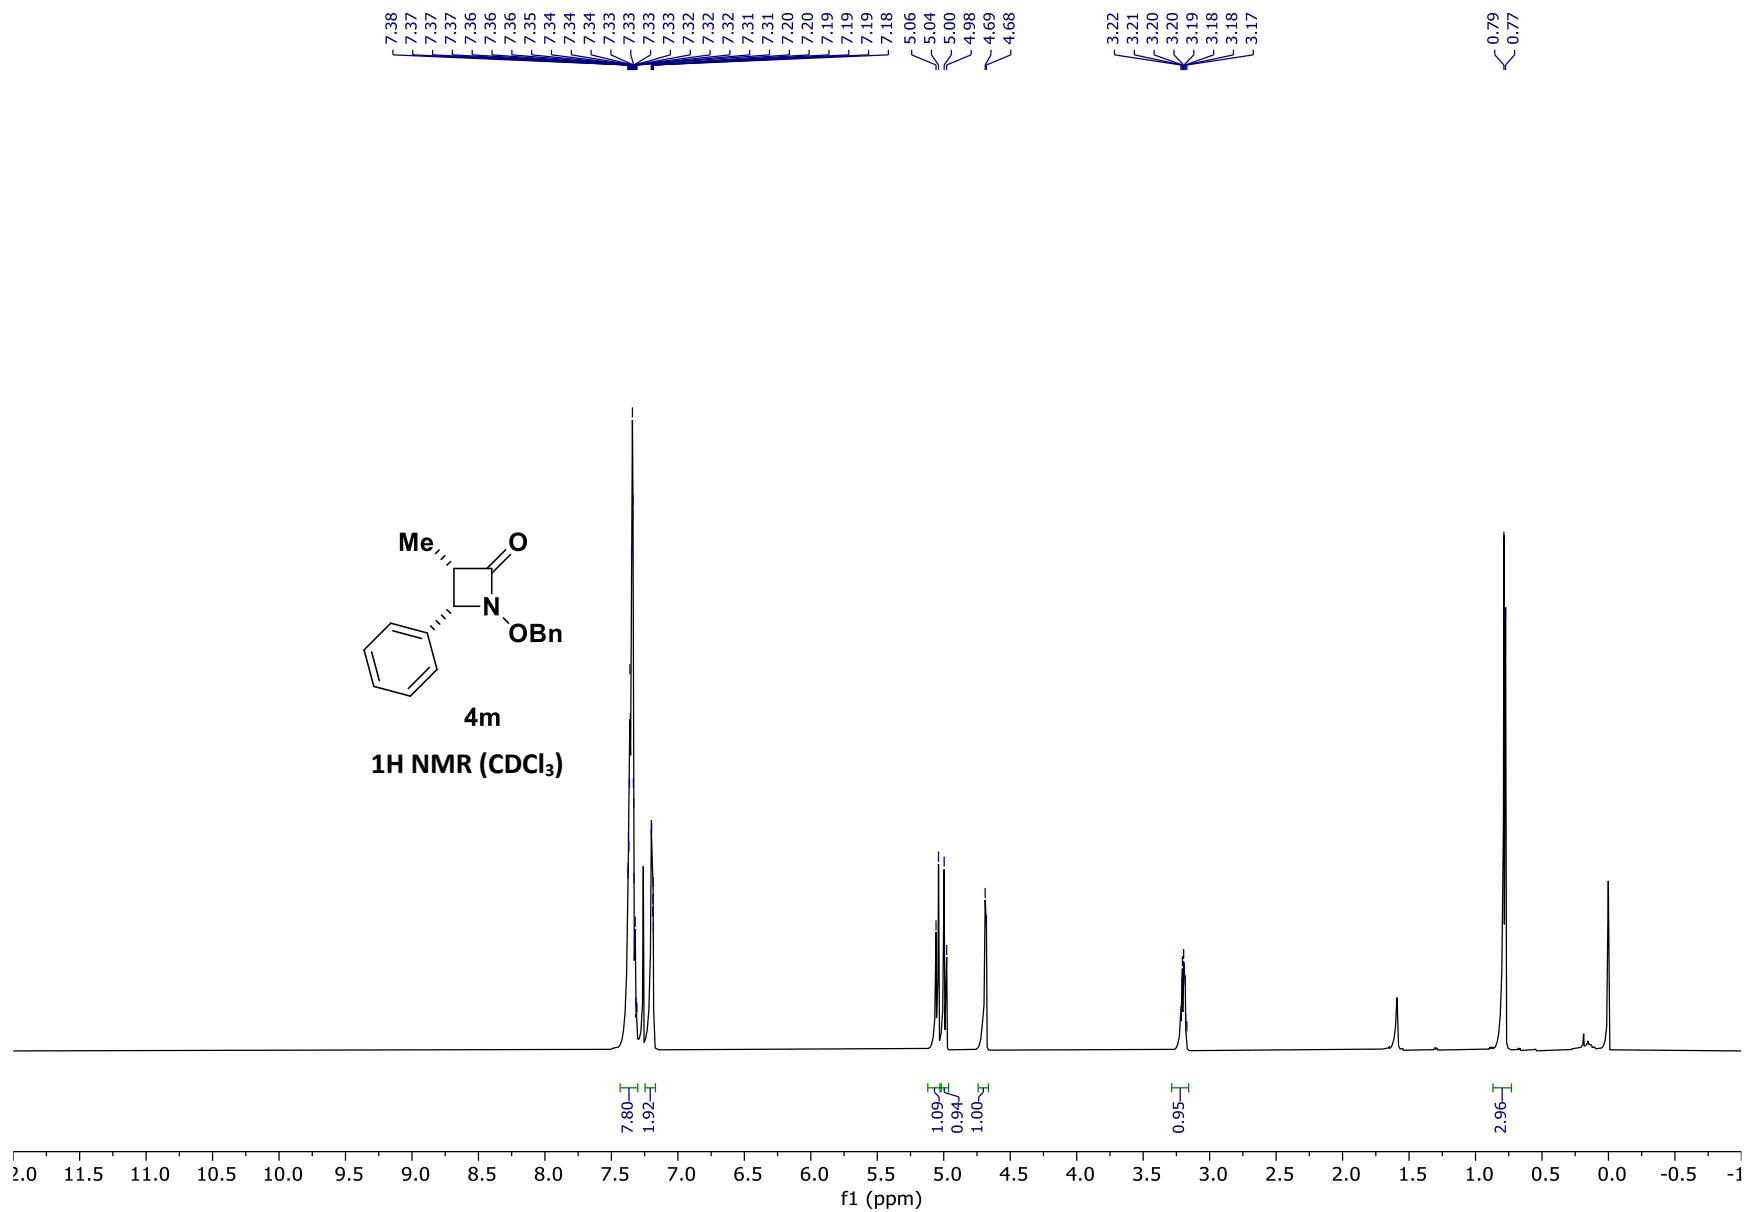

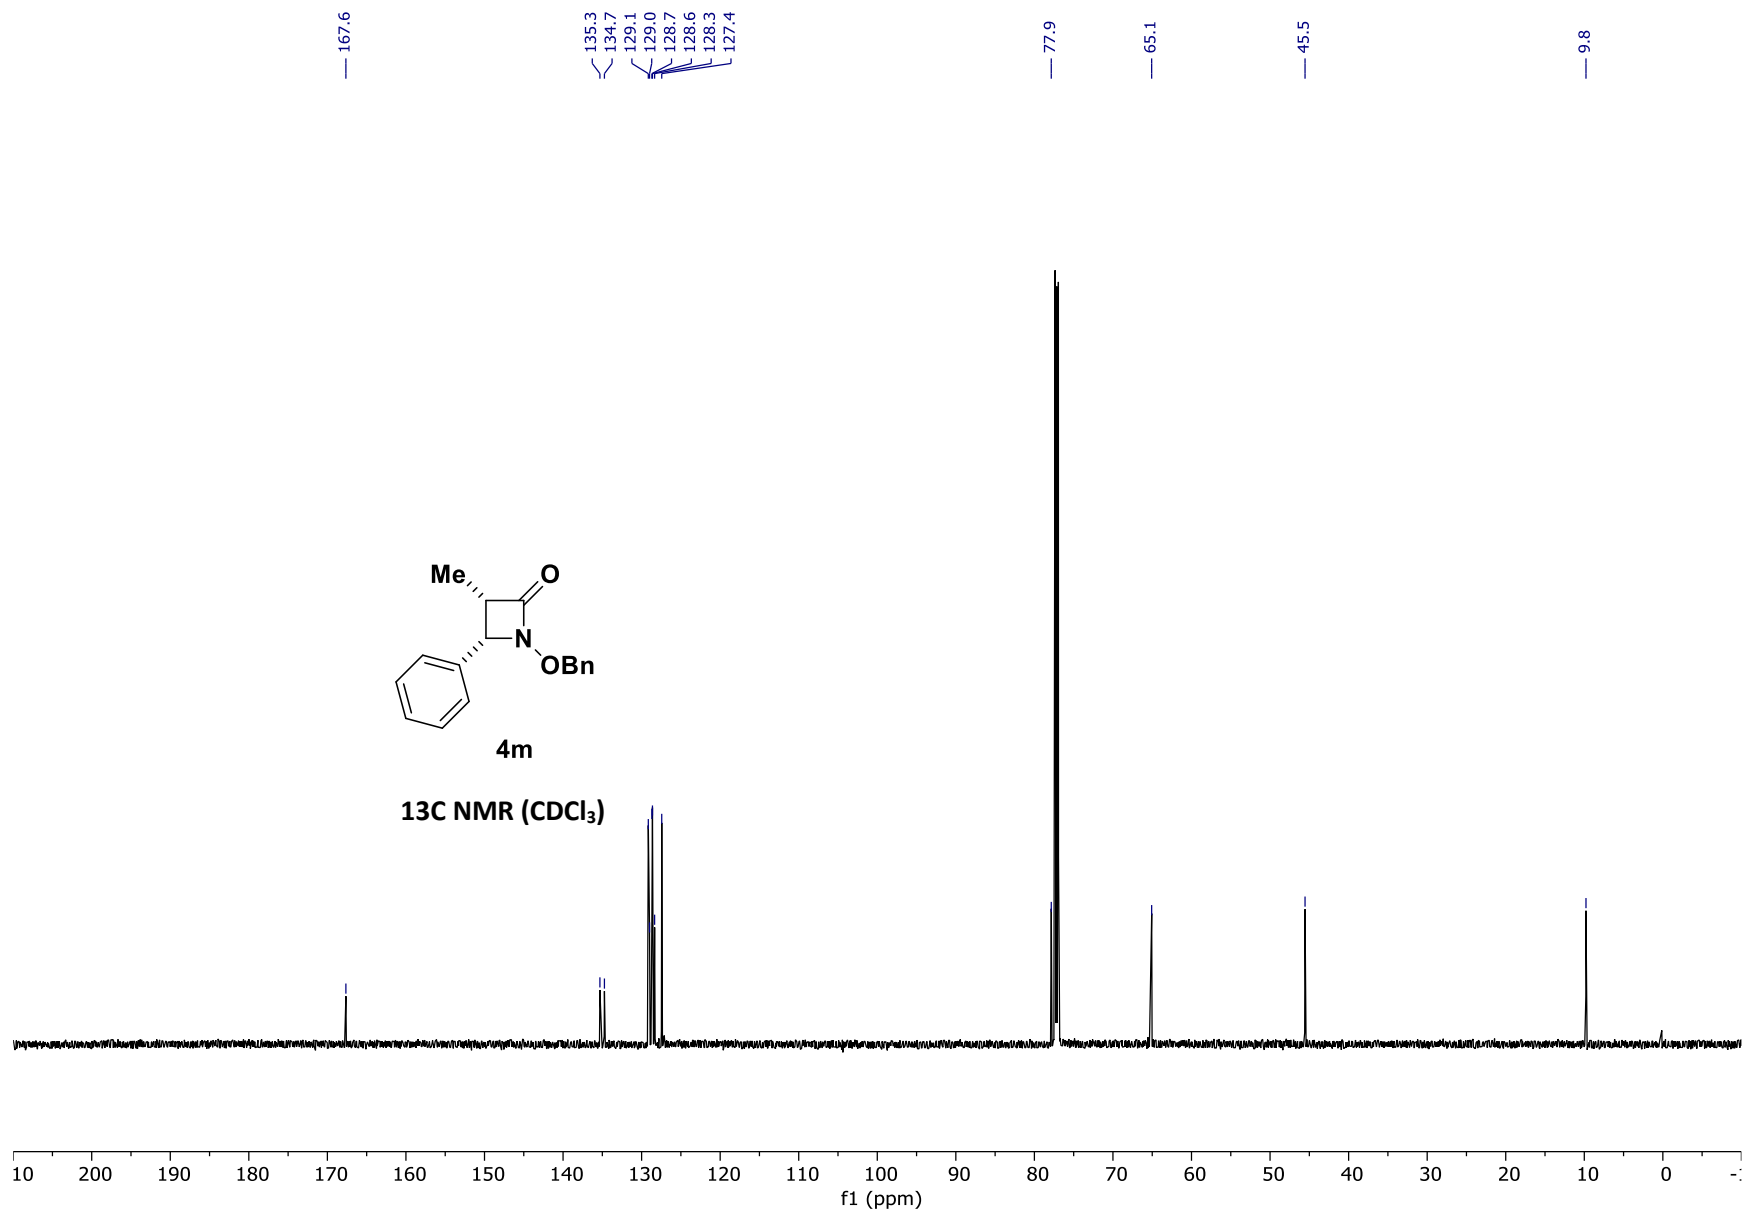

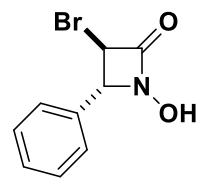

**6b**  
**<sup>1</sup>H NMR (CDCl<sub>3</sub>)**

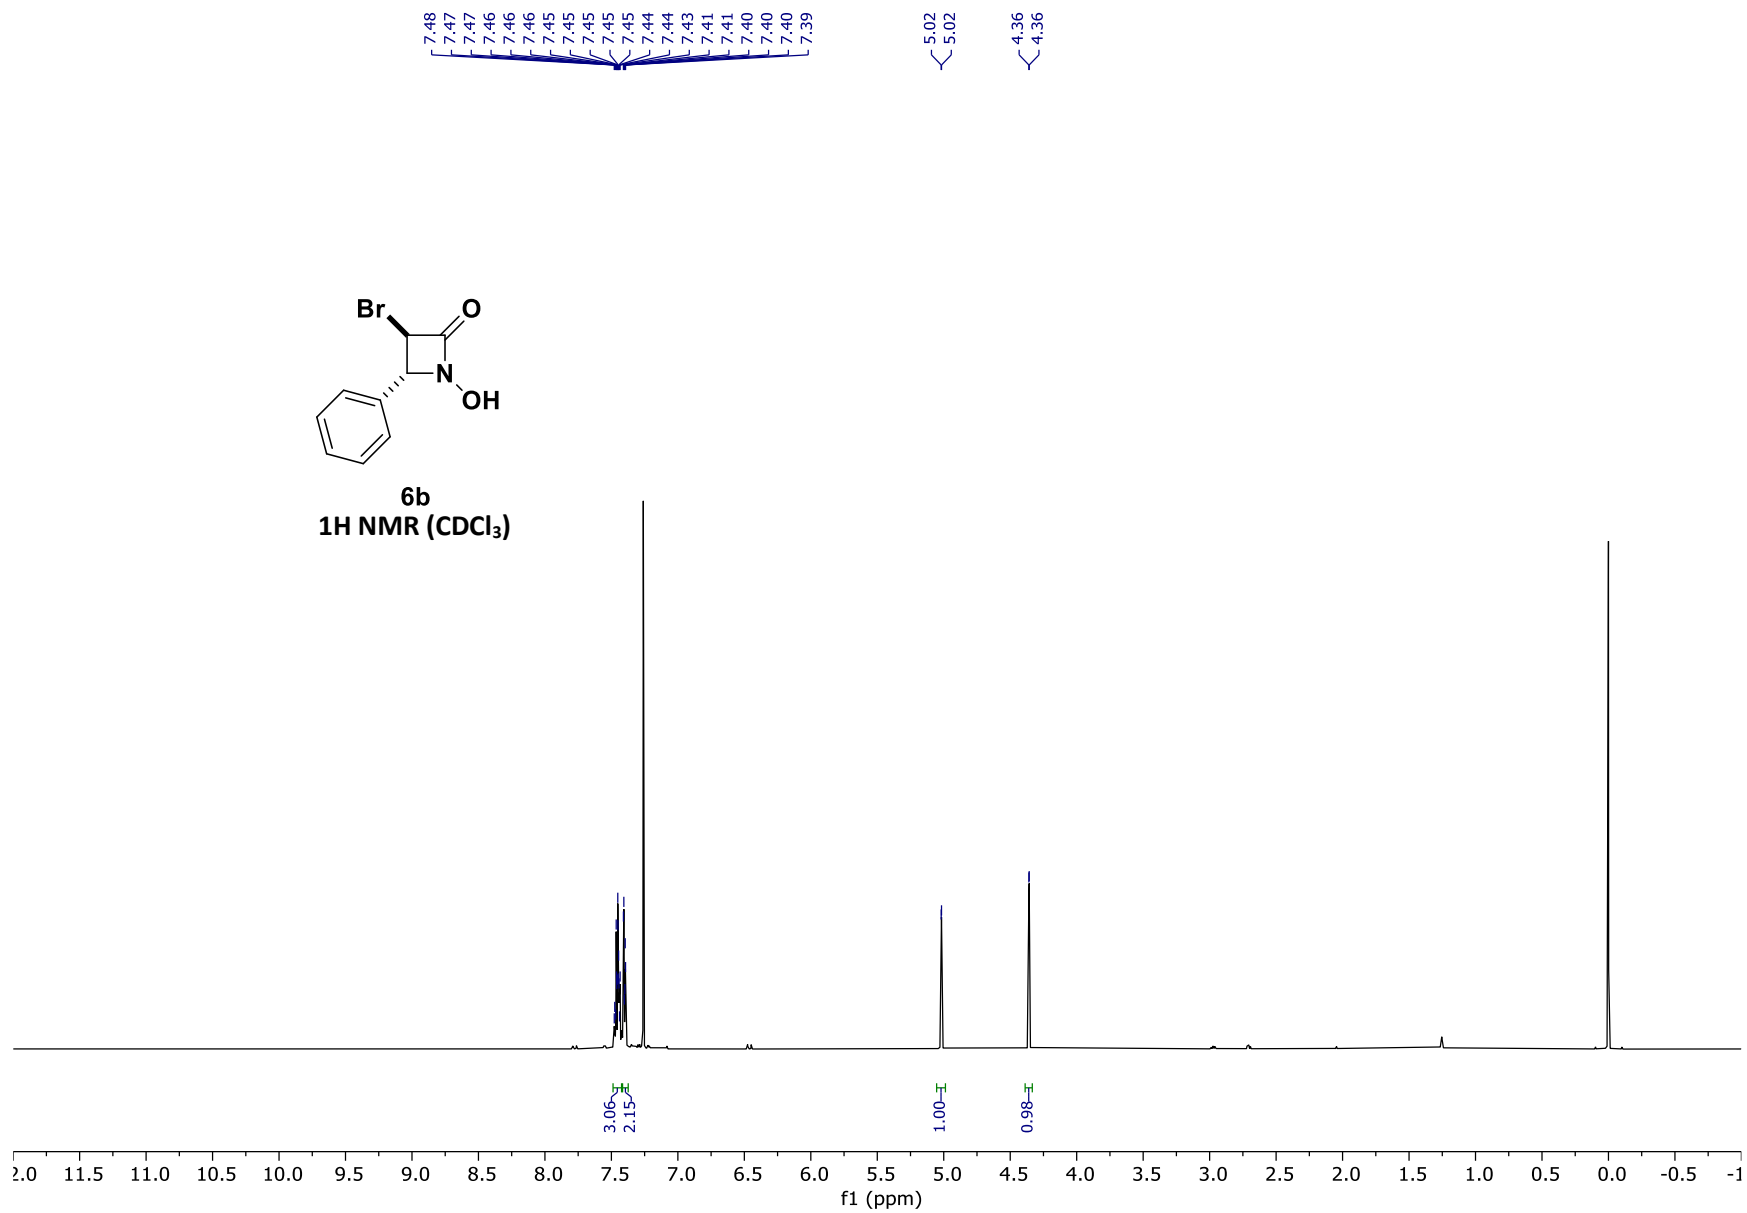

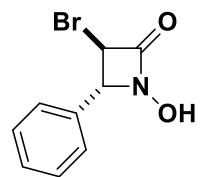

6b

<sup>13</sup>C NMR (CDCl<sub>3</sub>)

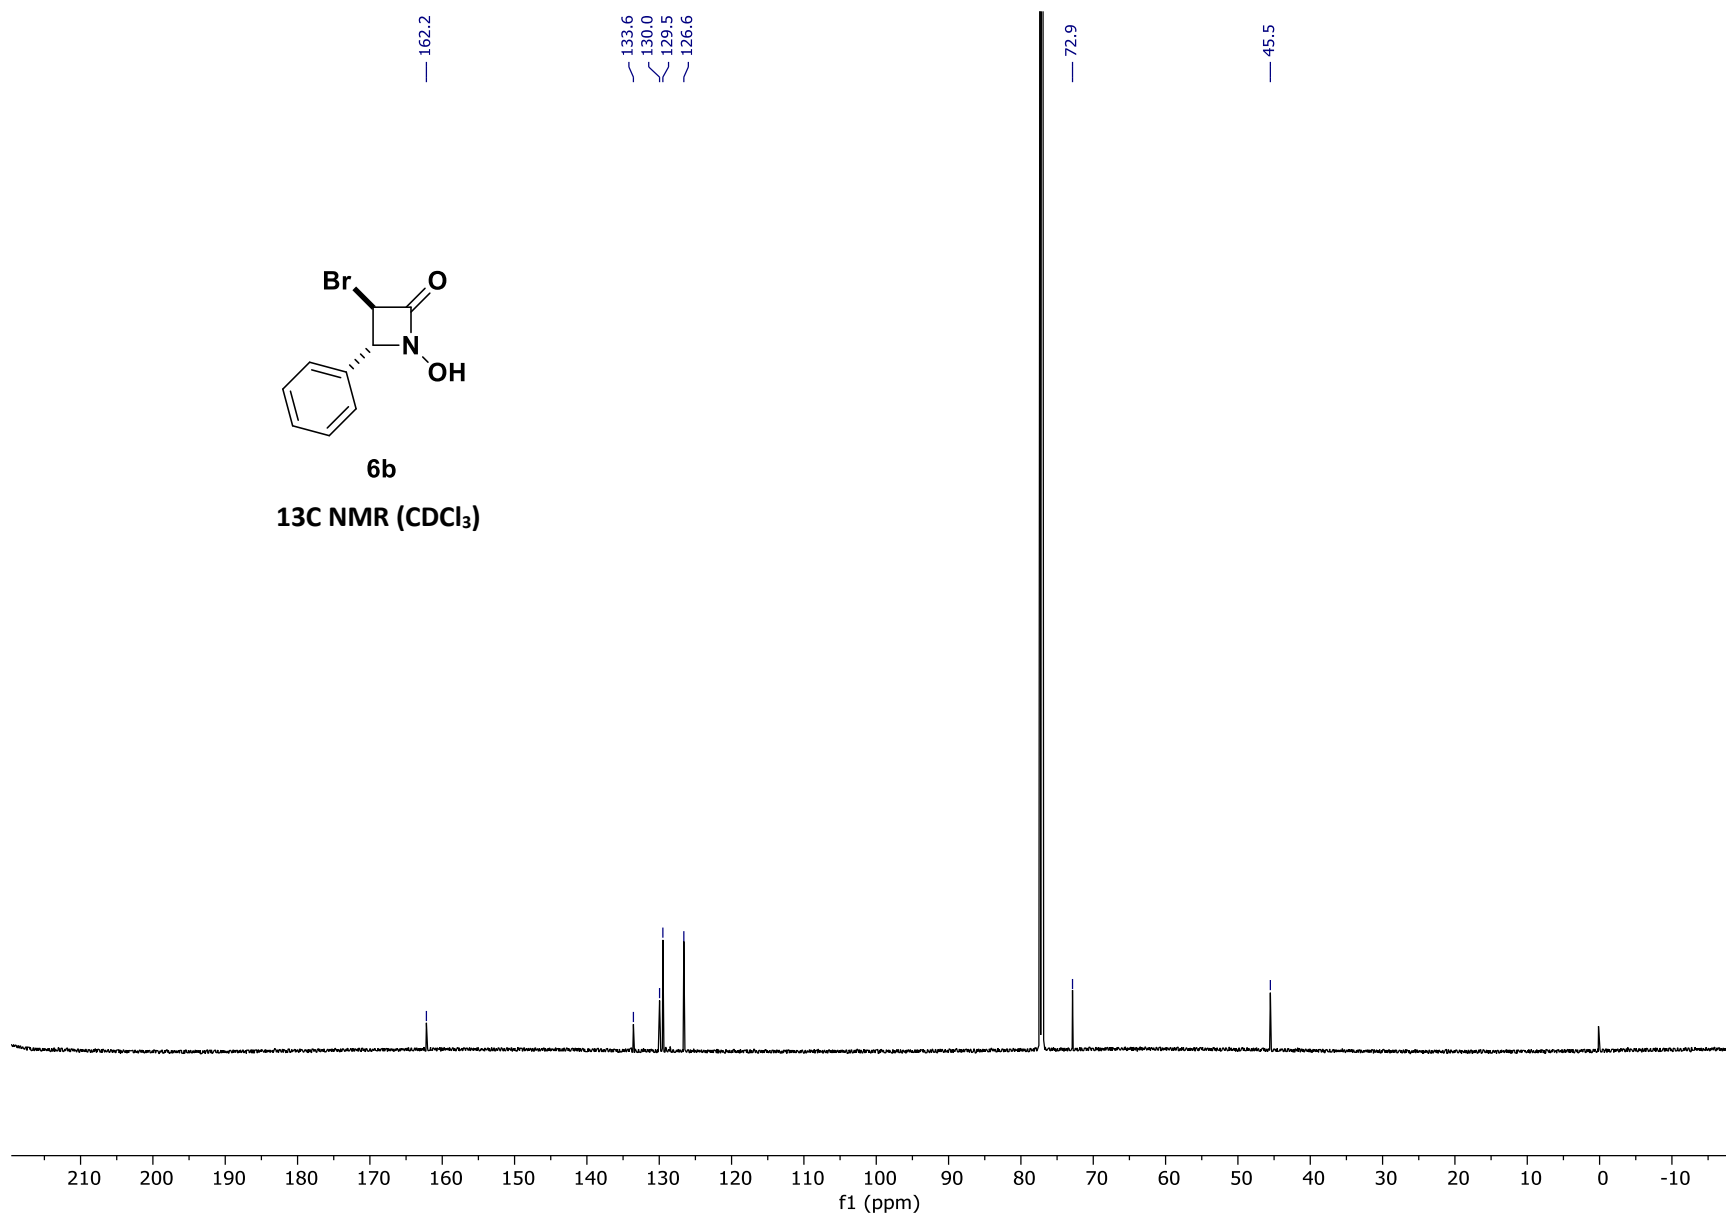



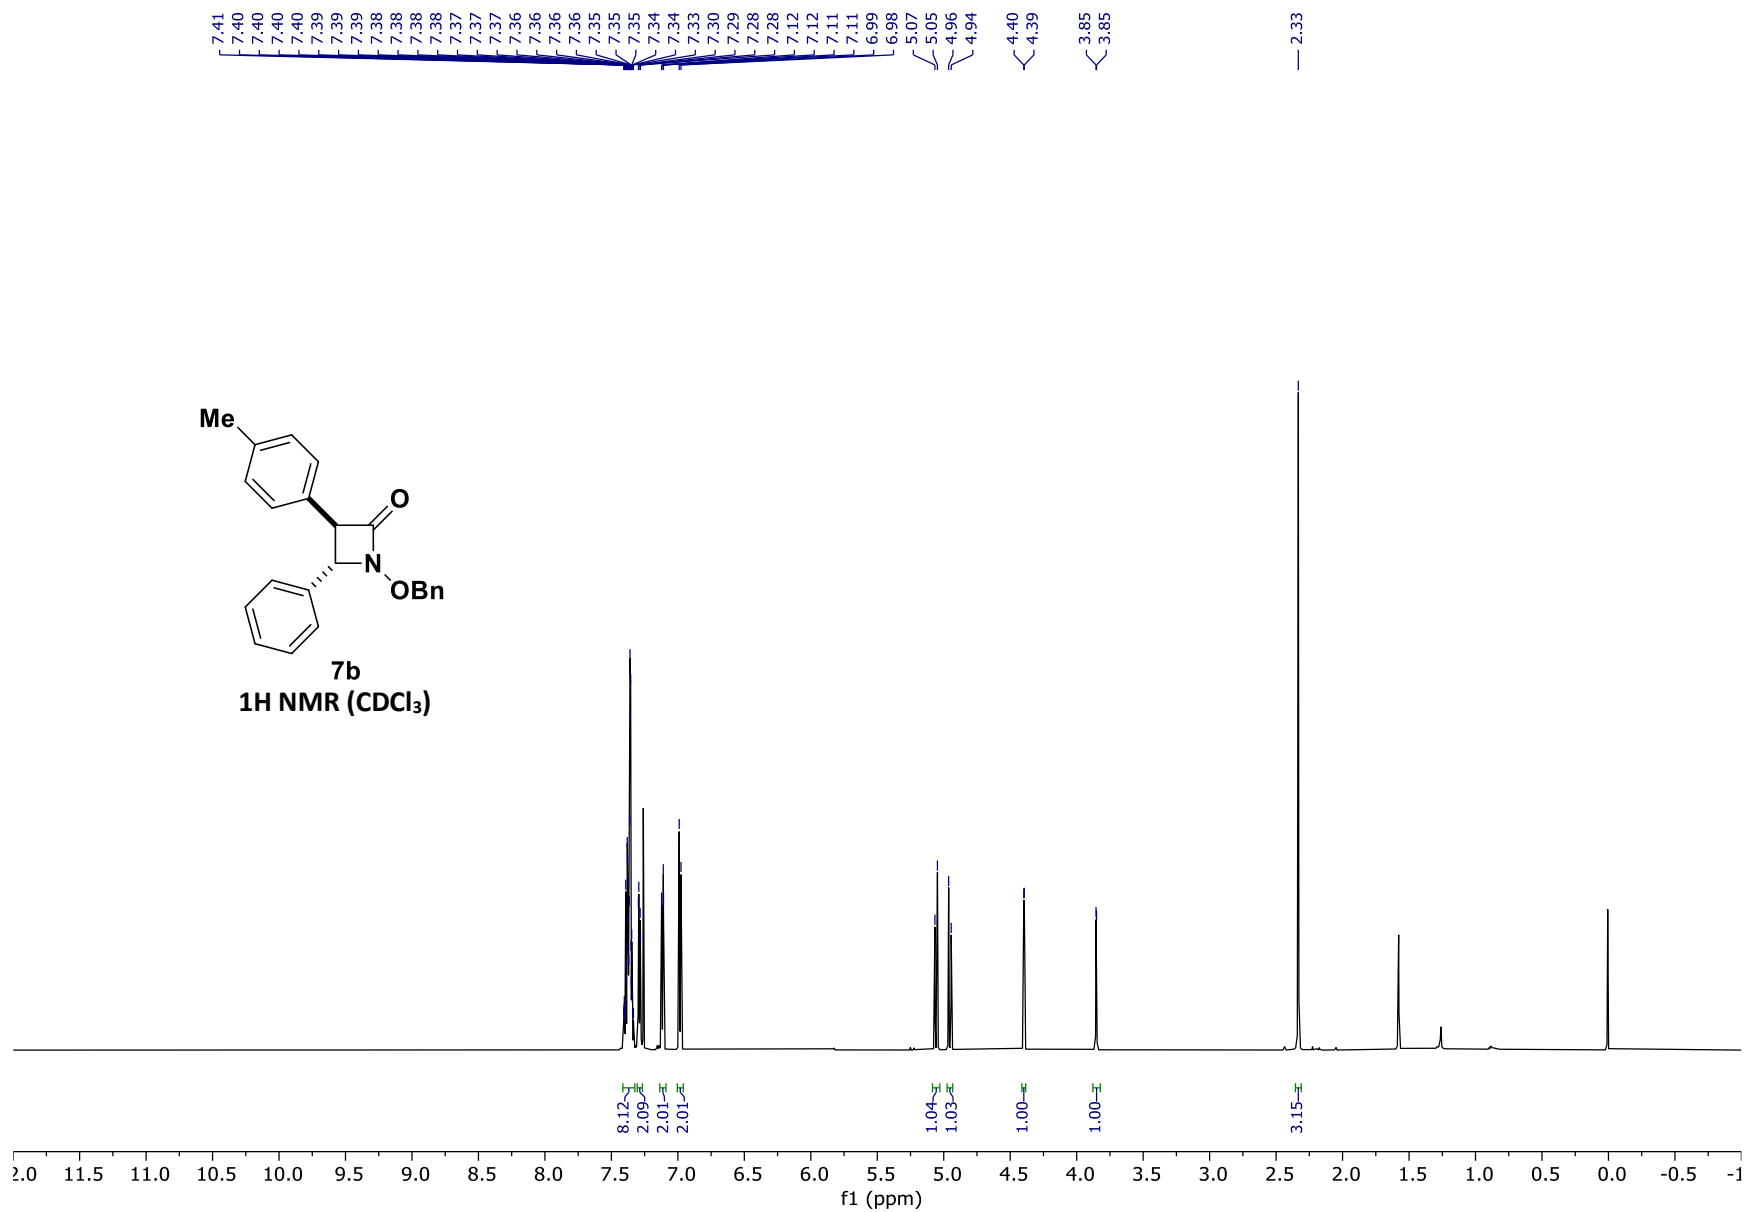

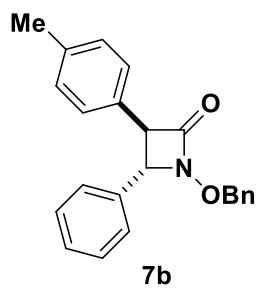

**<sup>13</sup>C NMR (CDCl<sub>3</sub>)**

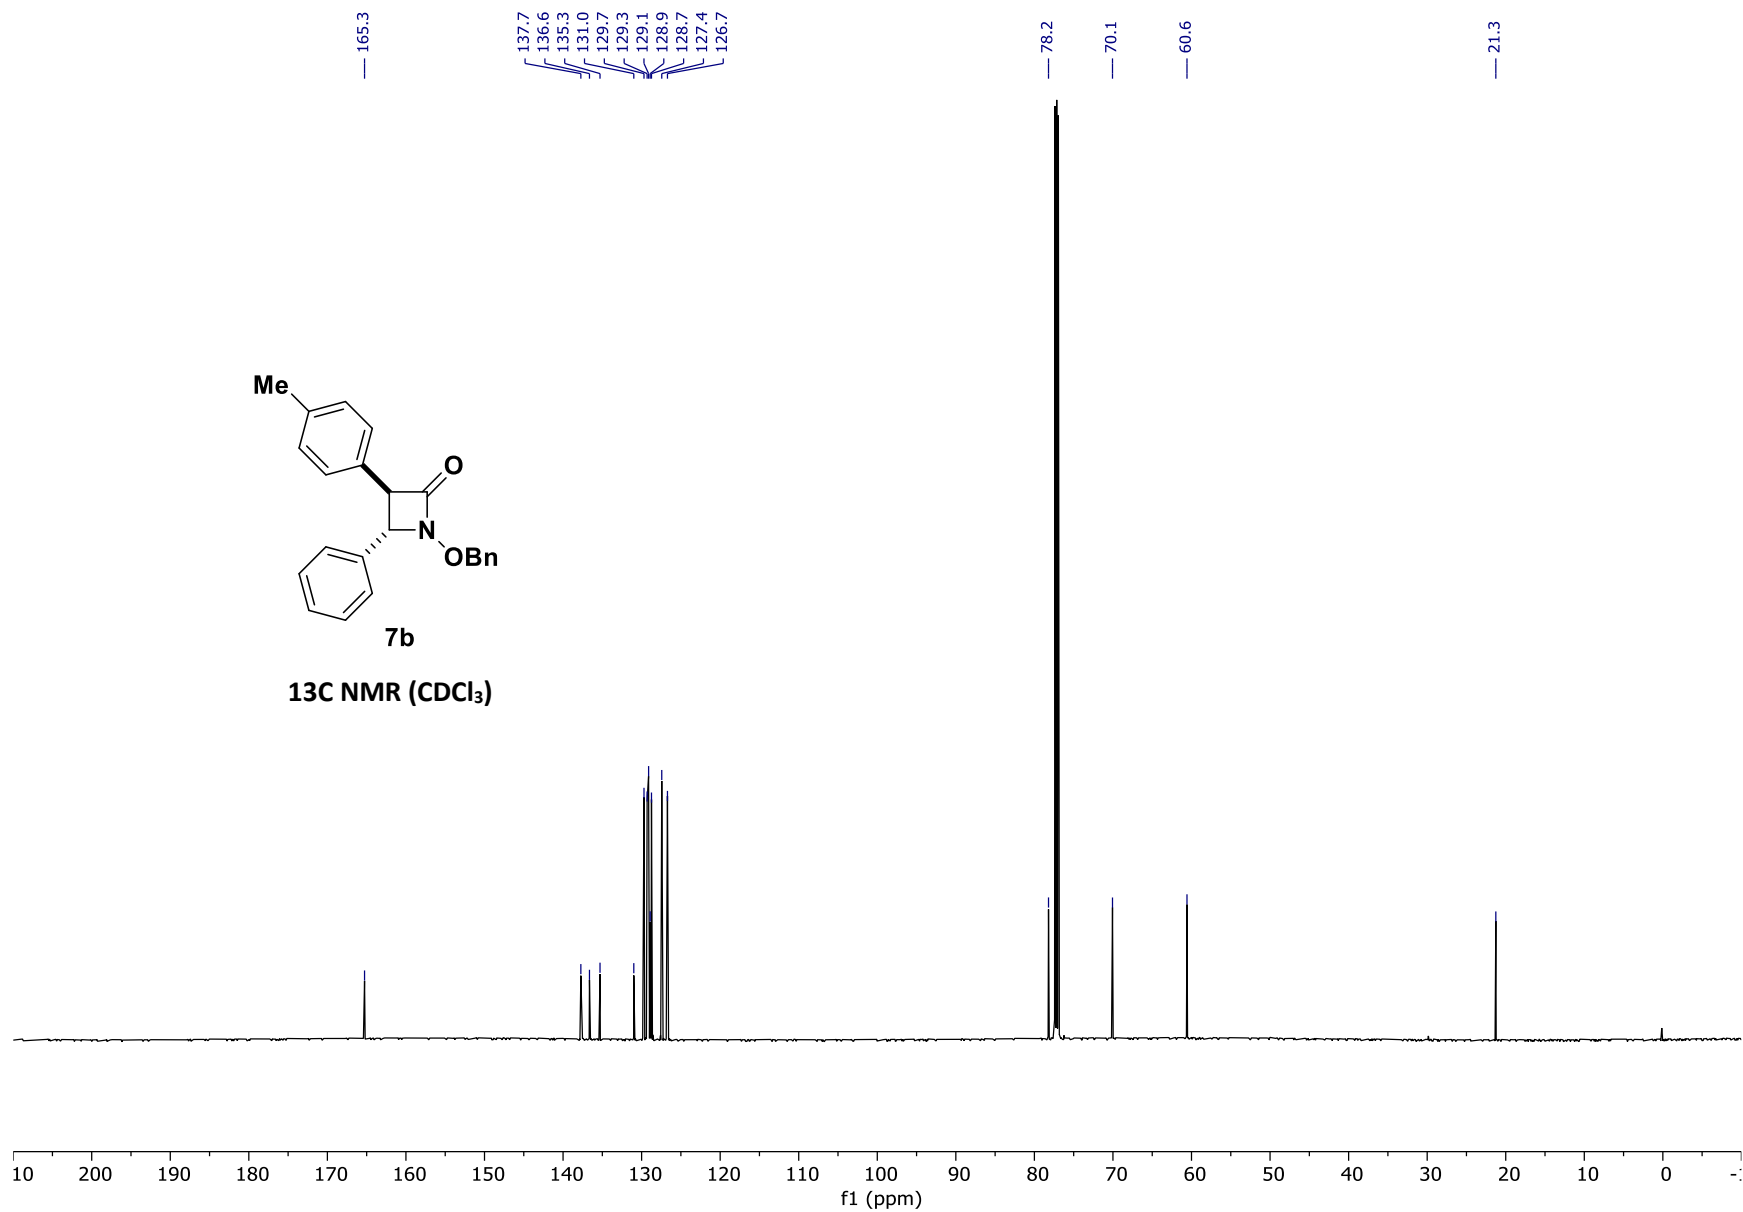

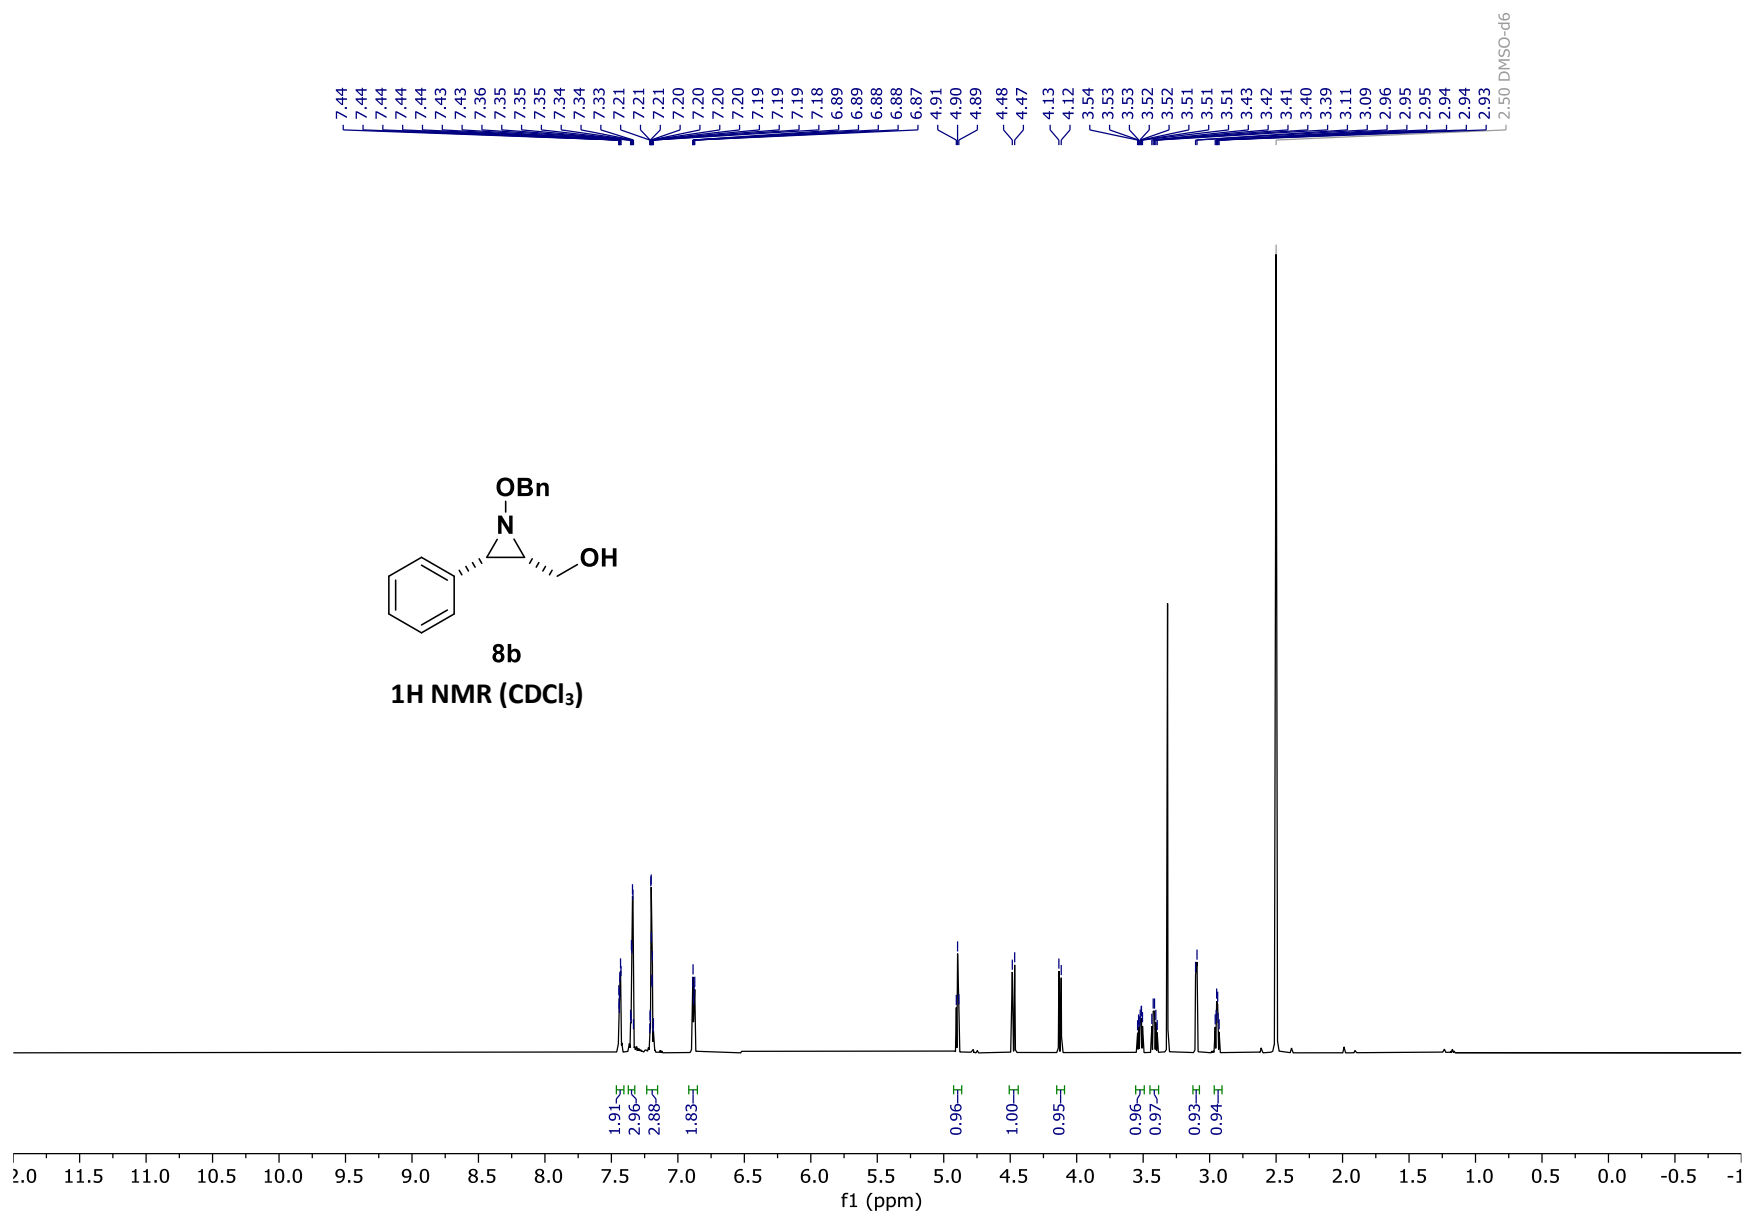

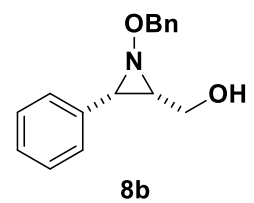

**$^{13}\text{C}$  NMR ( $\text{CDCl}_3$ )**

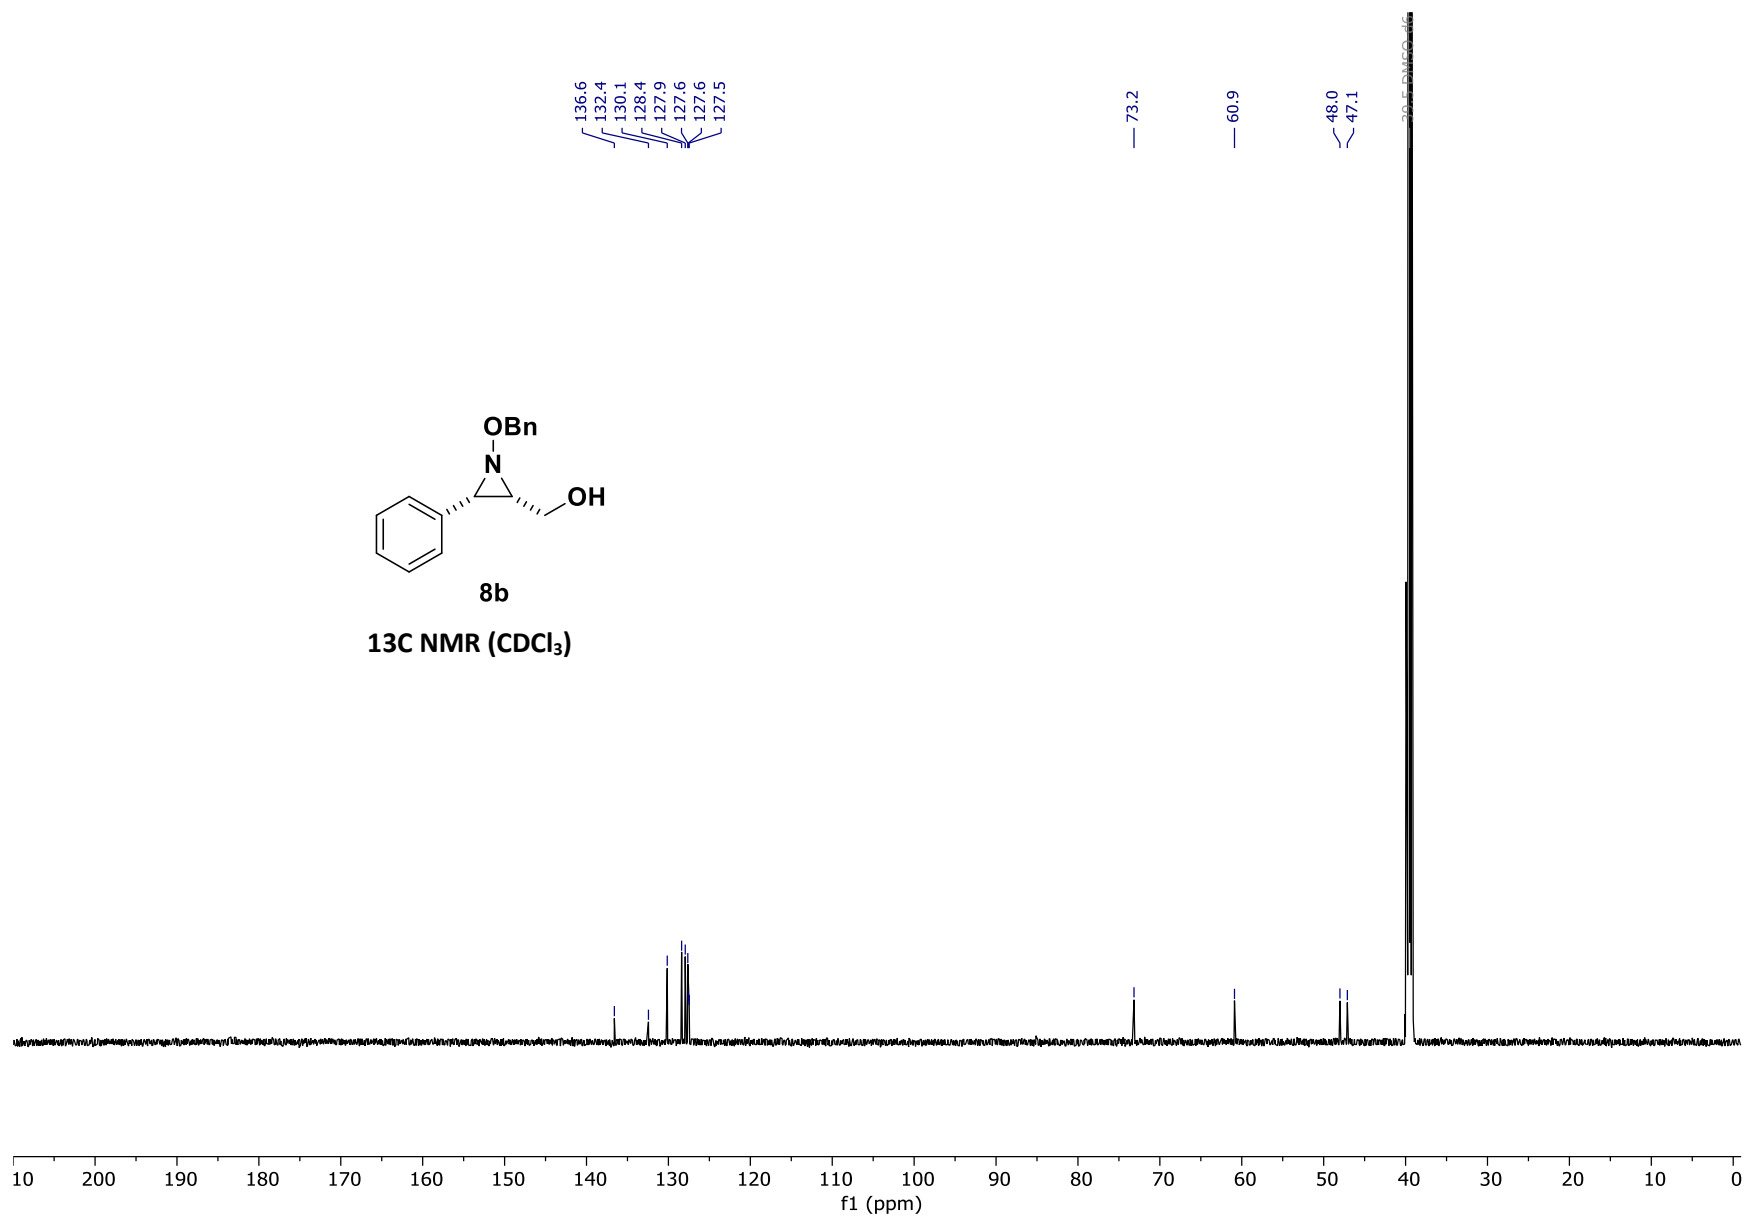

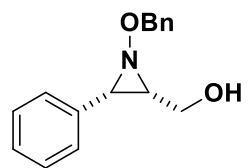

8b  
NOESY

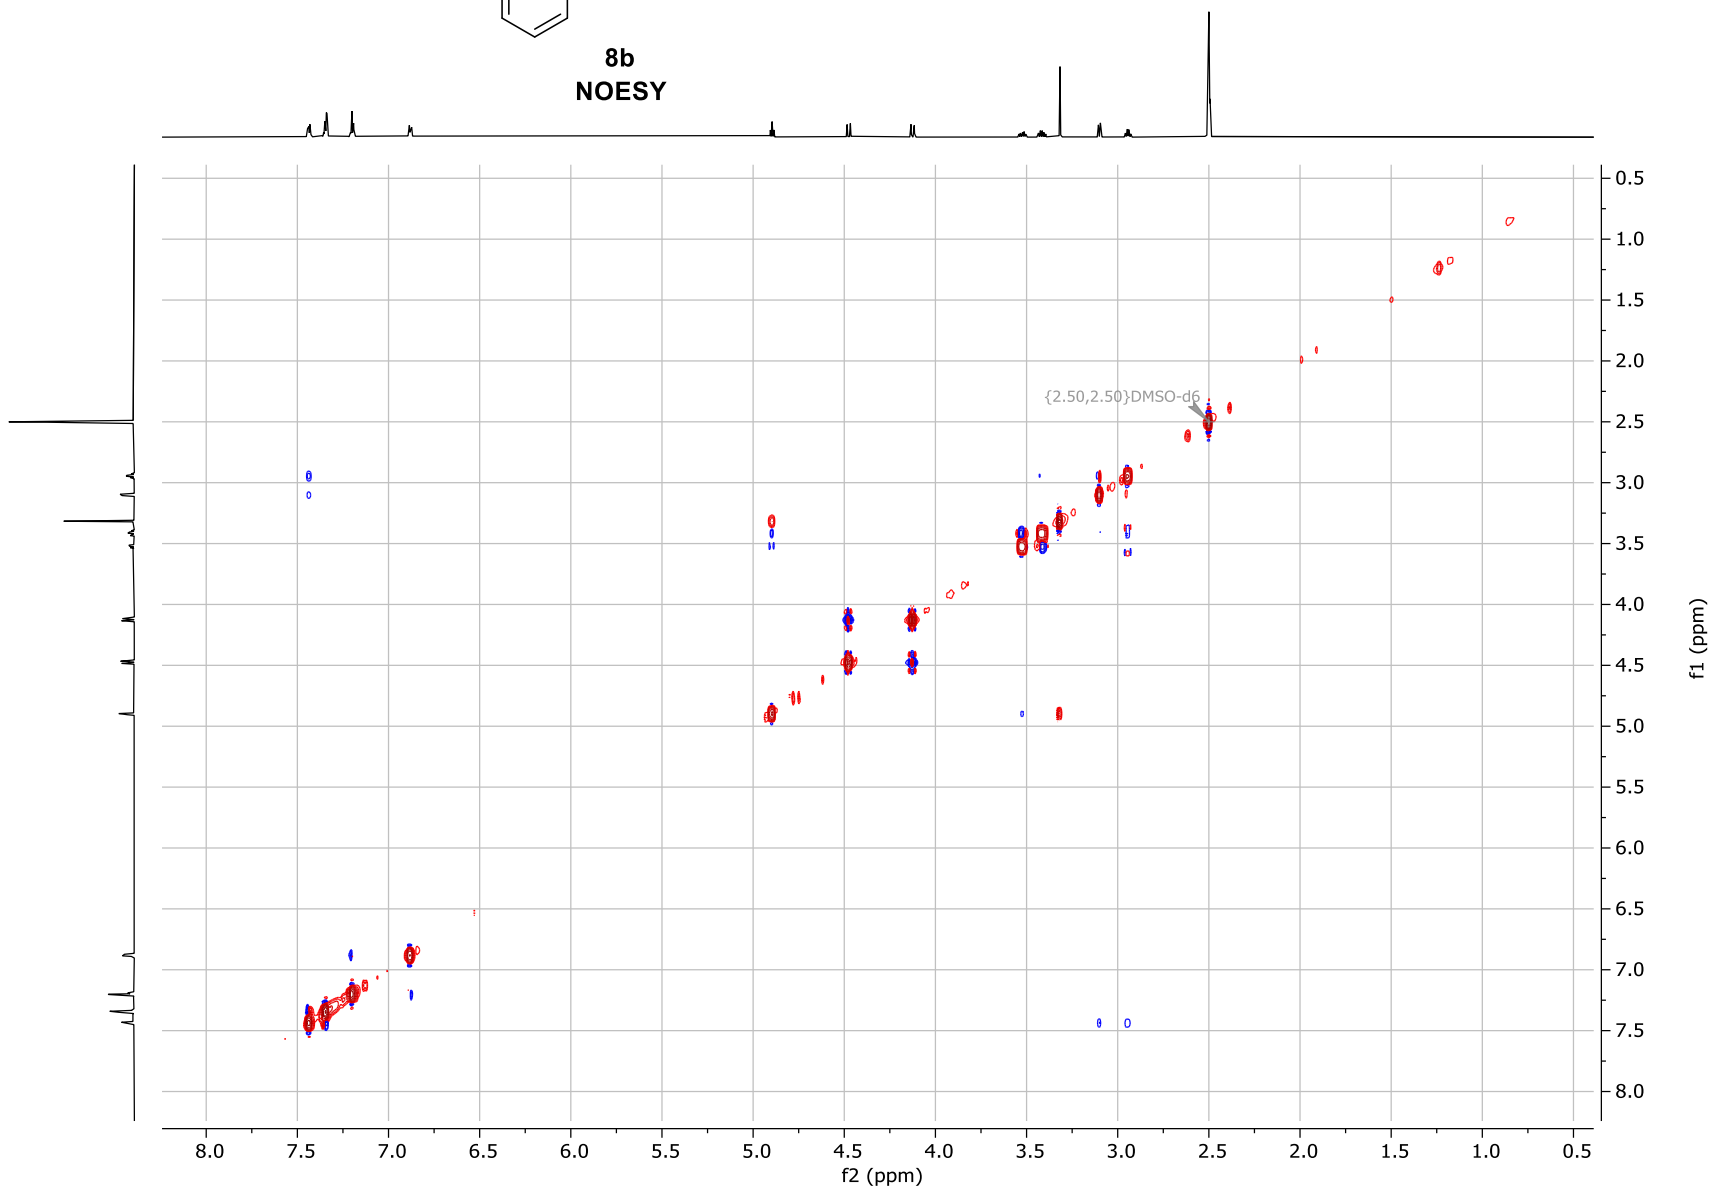

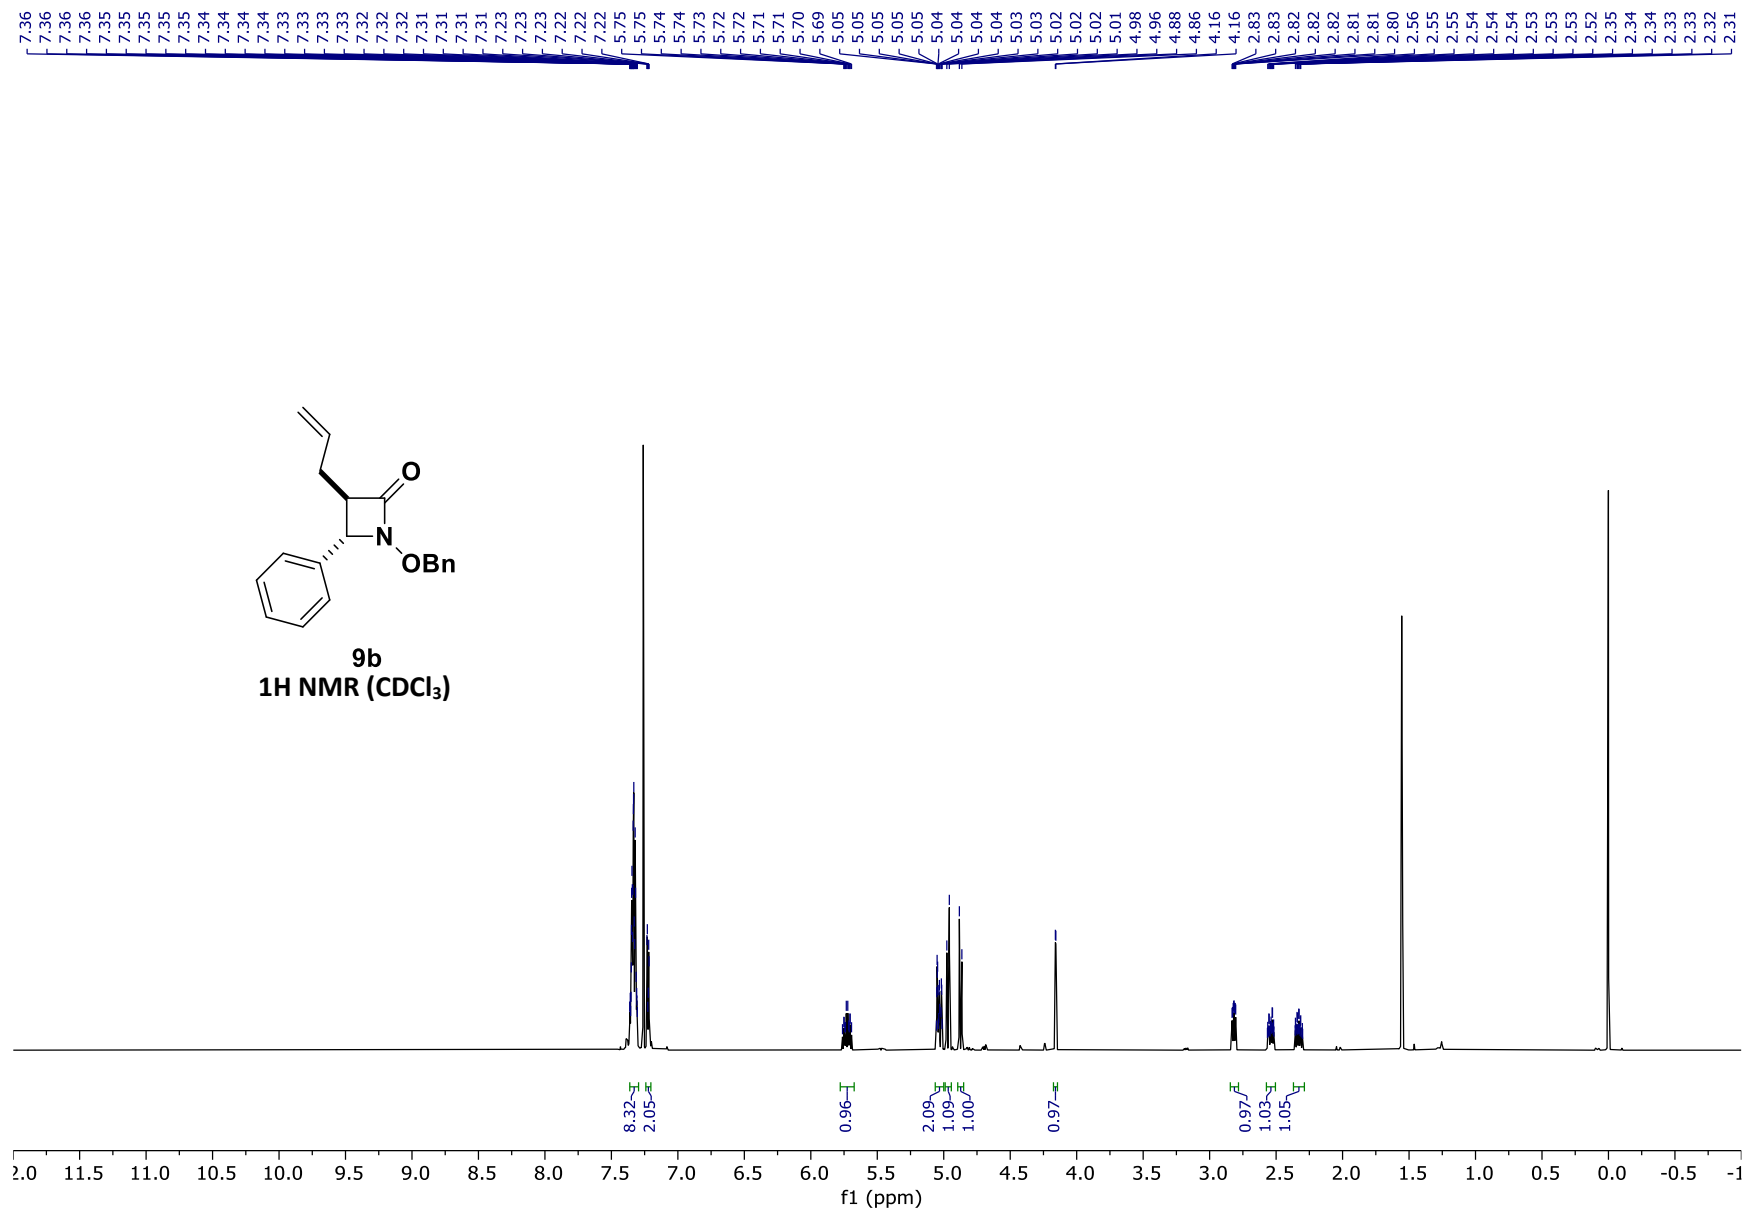

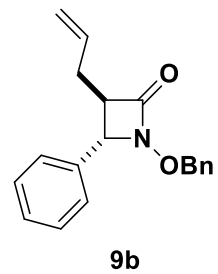

**<sup>13</sup>C NMR (CDCl<sub>3</sub>)**

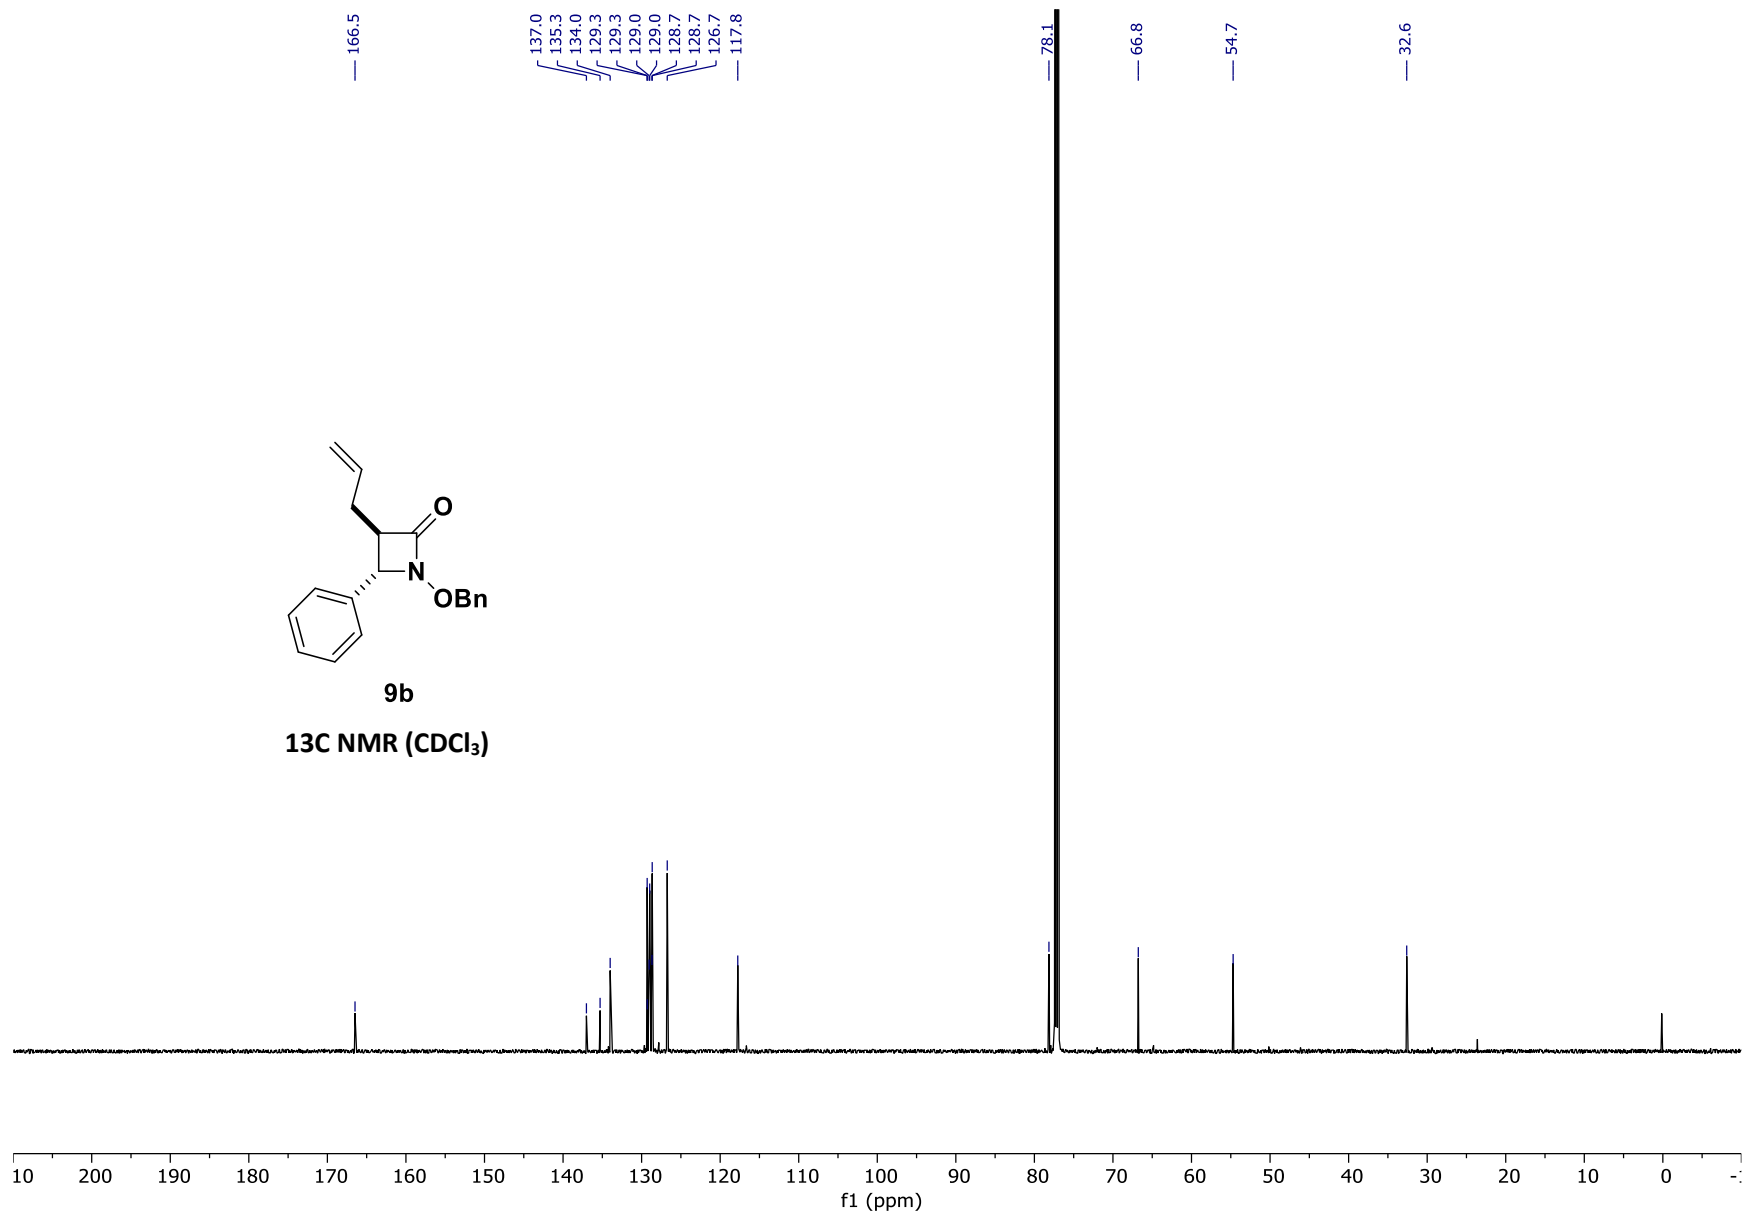

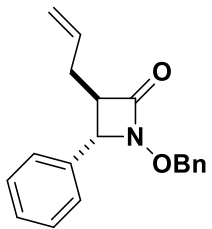

9b  
NOESY

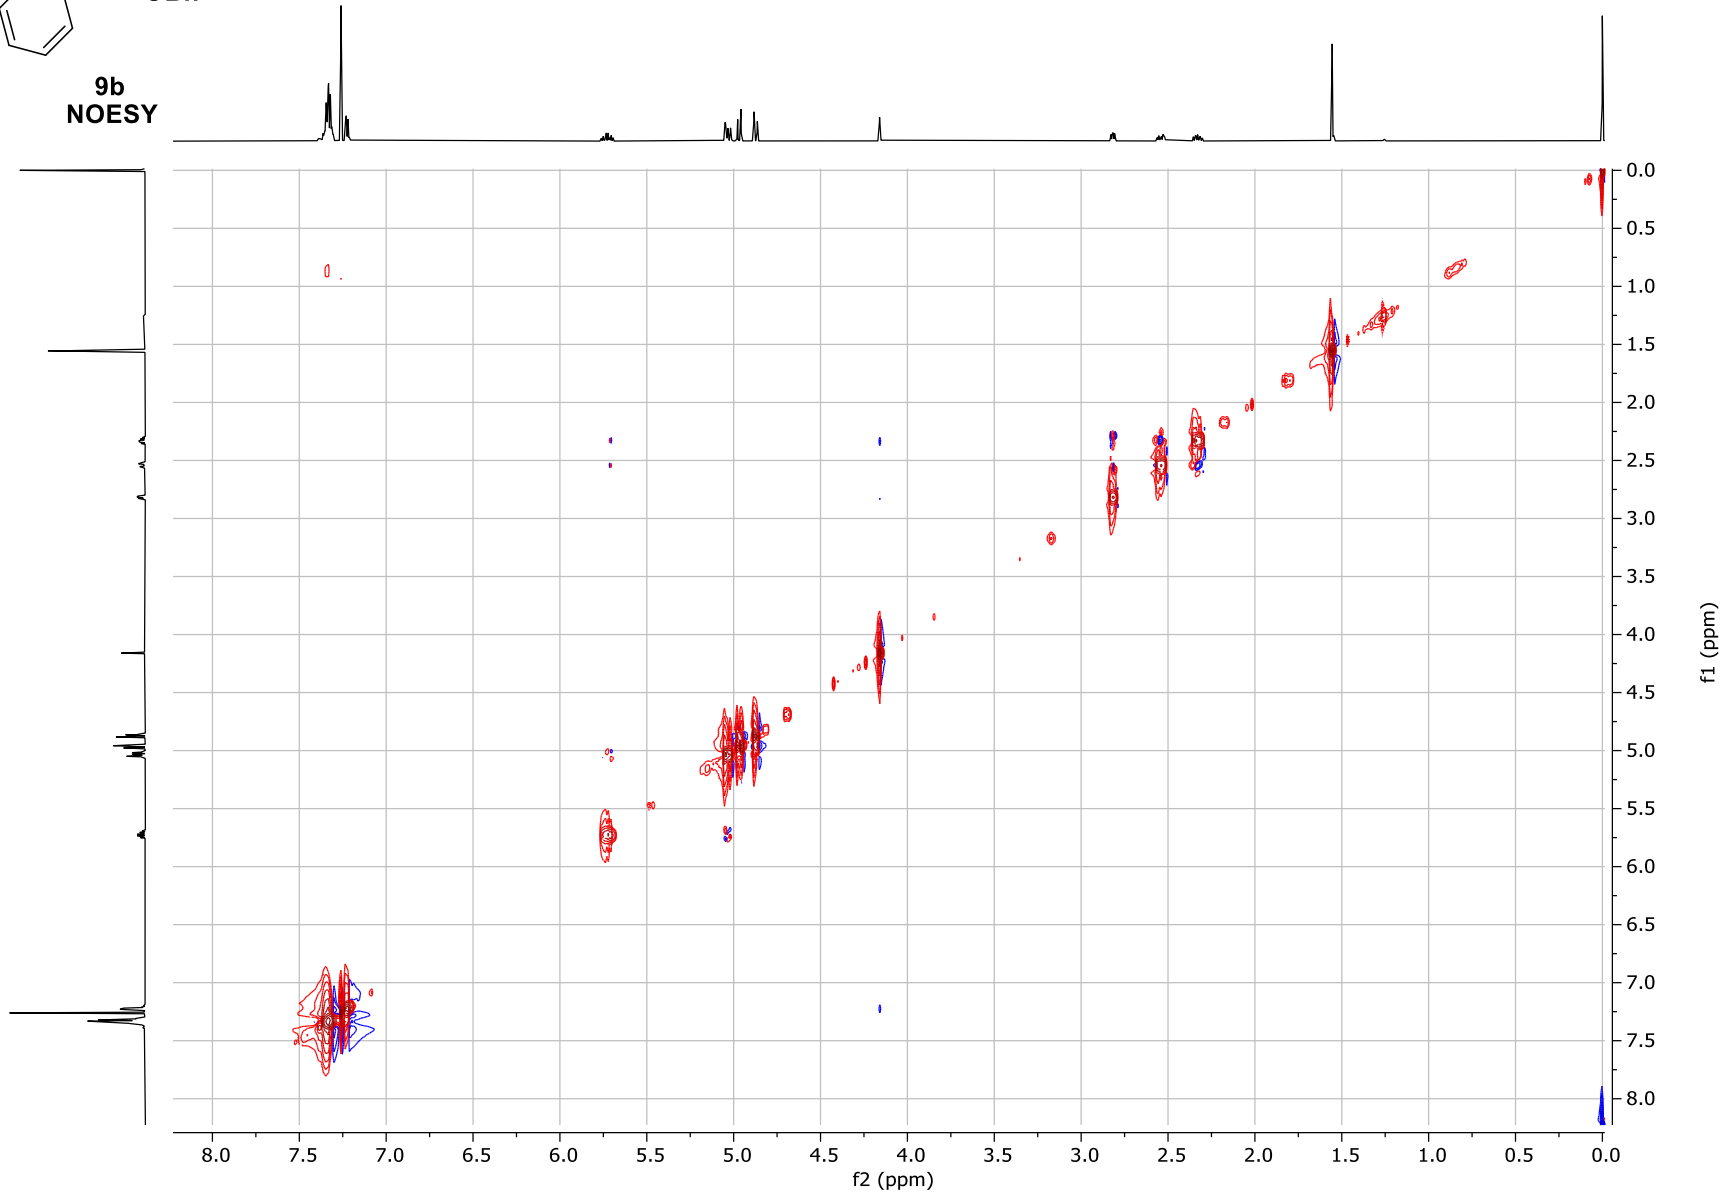



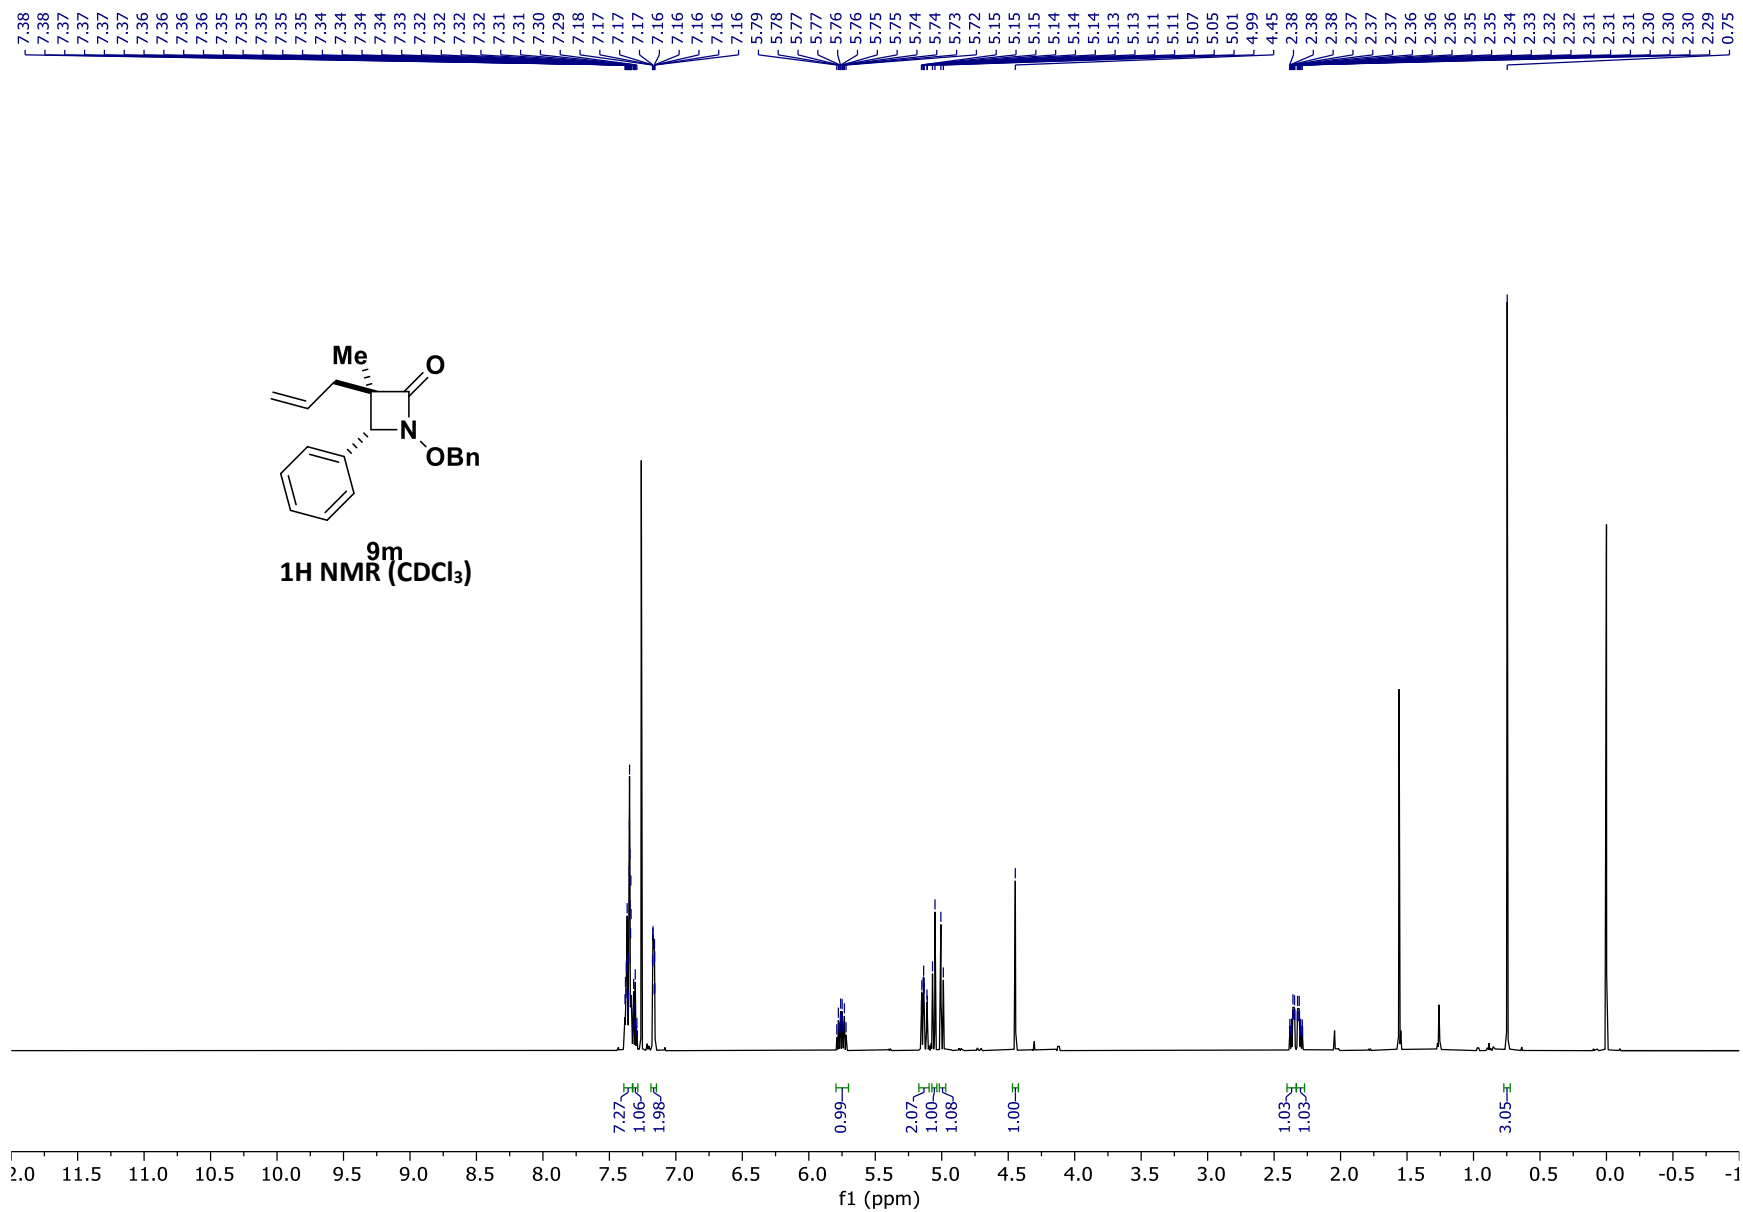

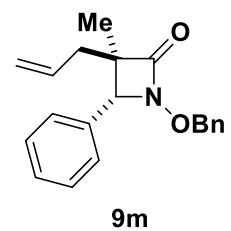

**<sup>13</sup>C NMR (CDCl<sub>3</sub>)**

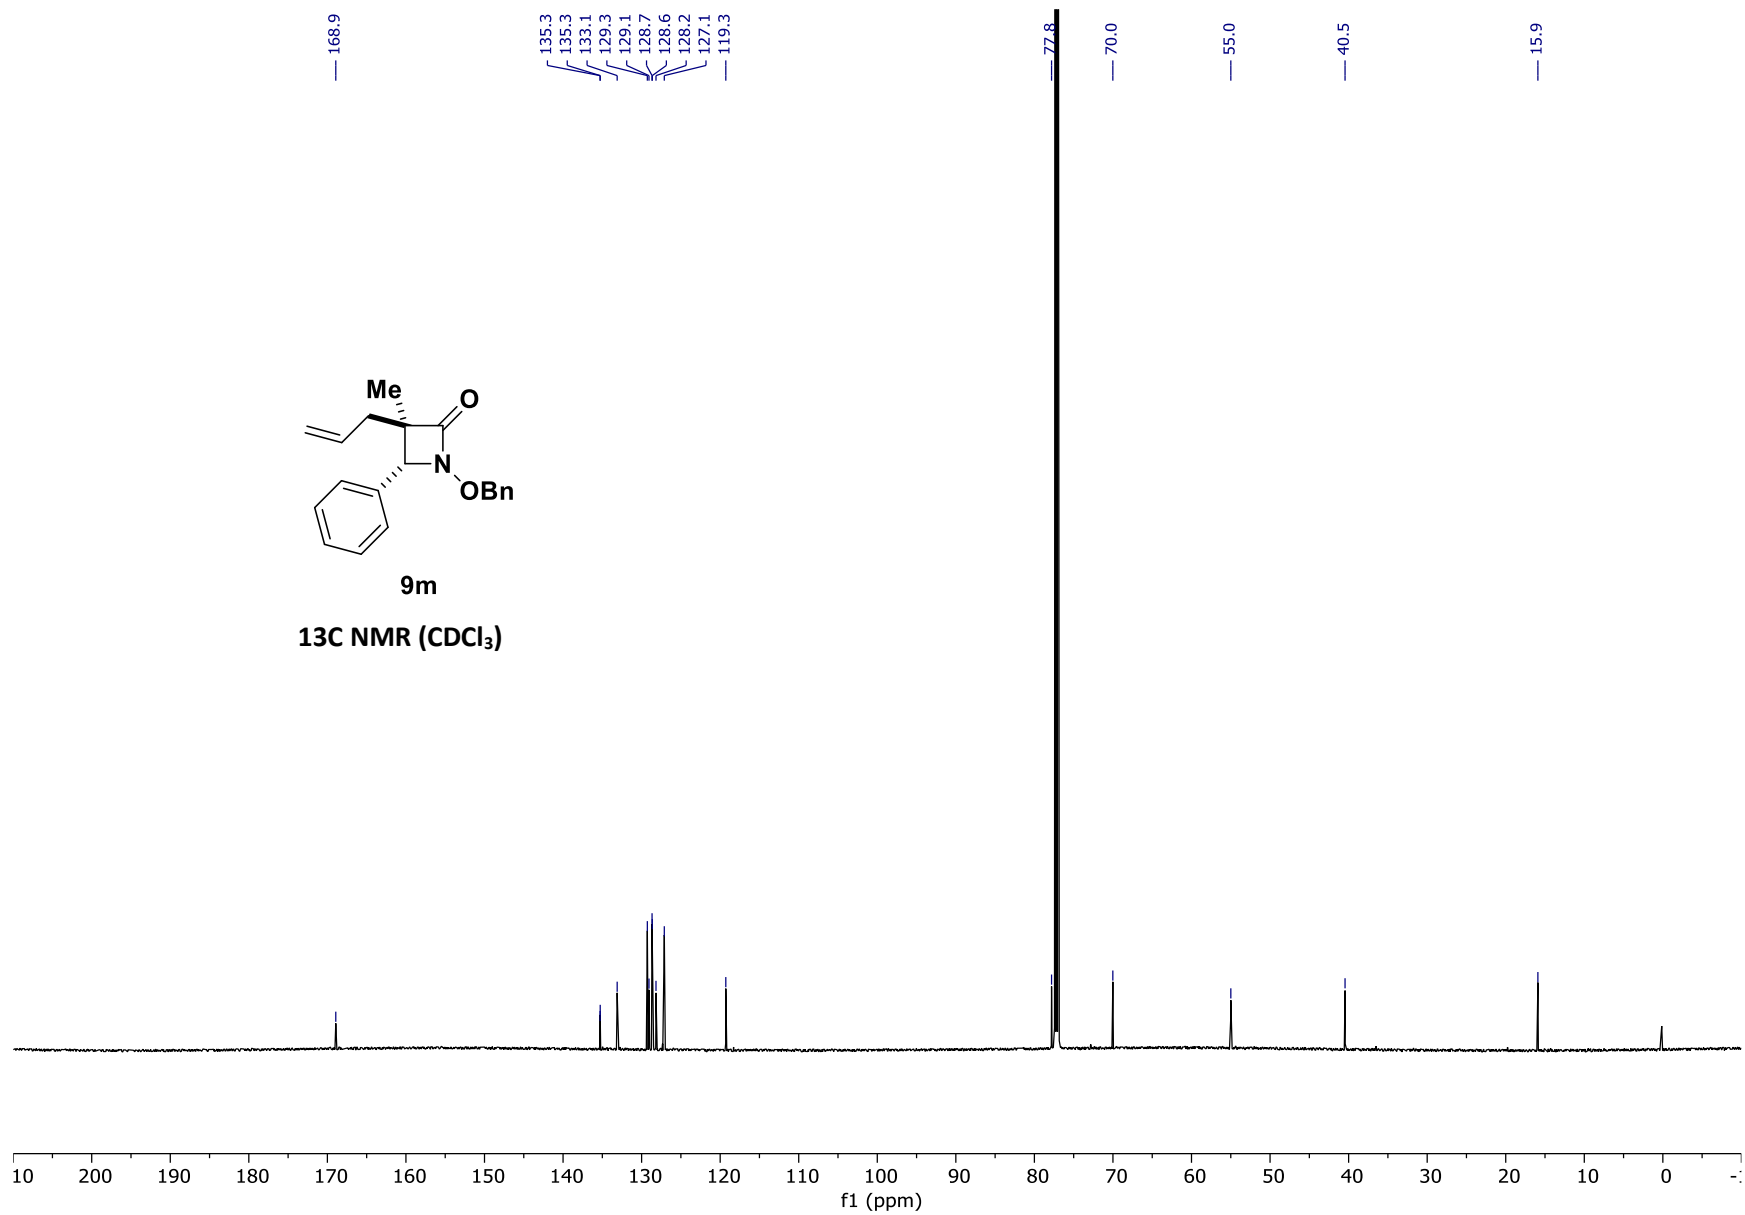

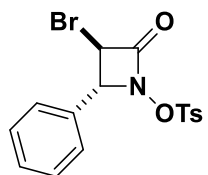

**10b**  
**<sup>1</sup>H NMR (CDCl<sub>3</sub>)**

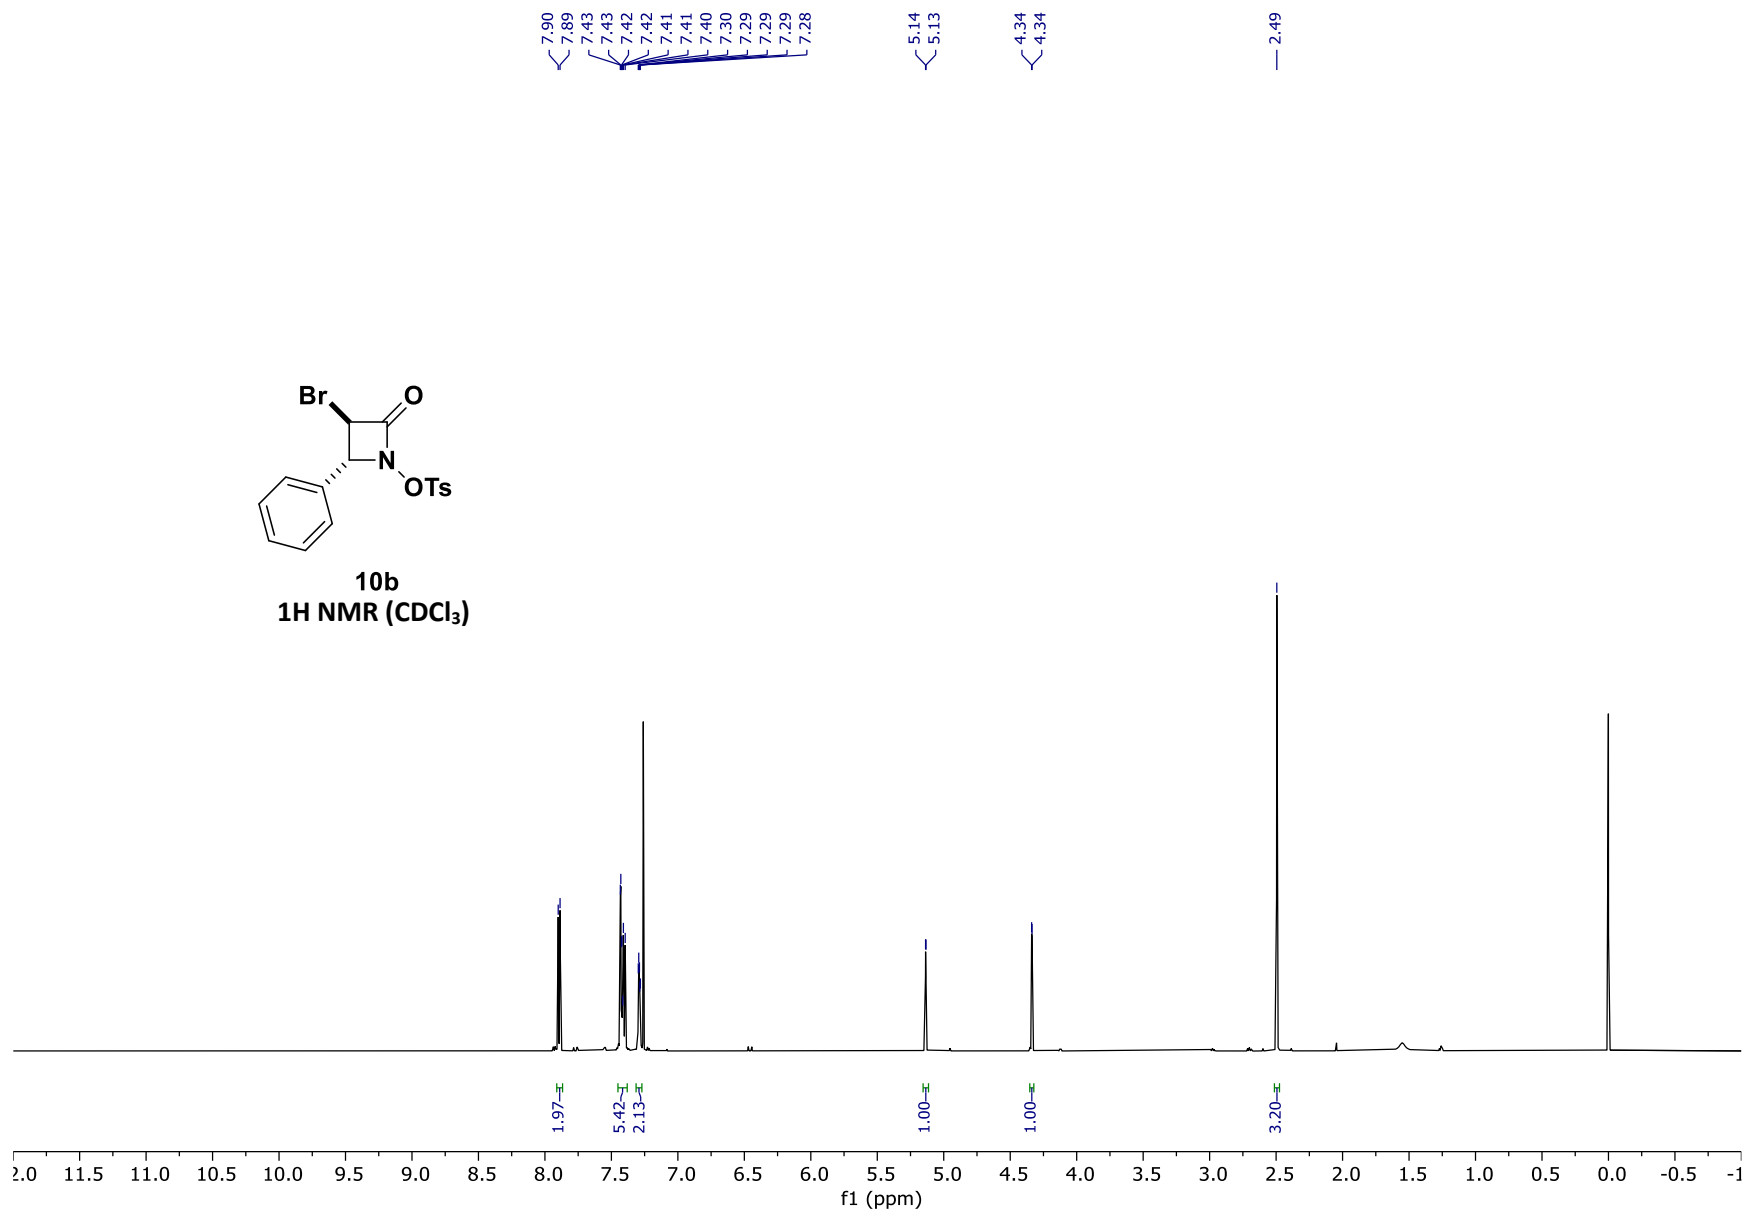

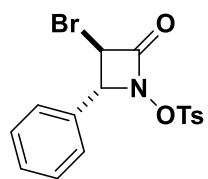

10b

<sup>13</sup>C NMR (CDCl<sub>3</sub>)

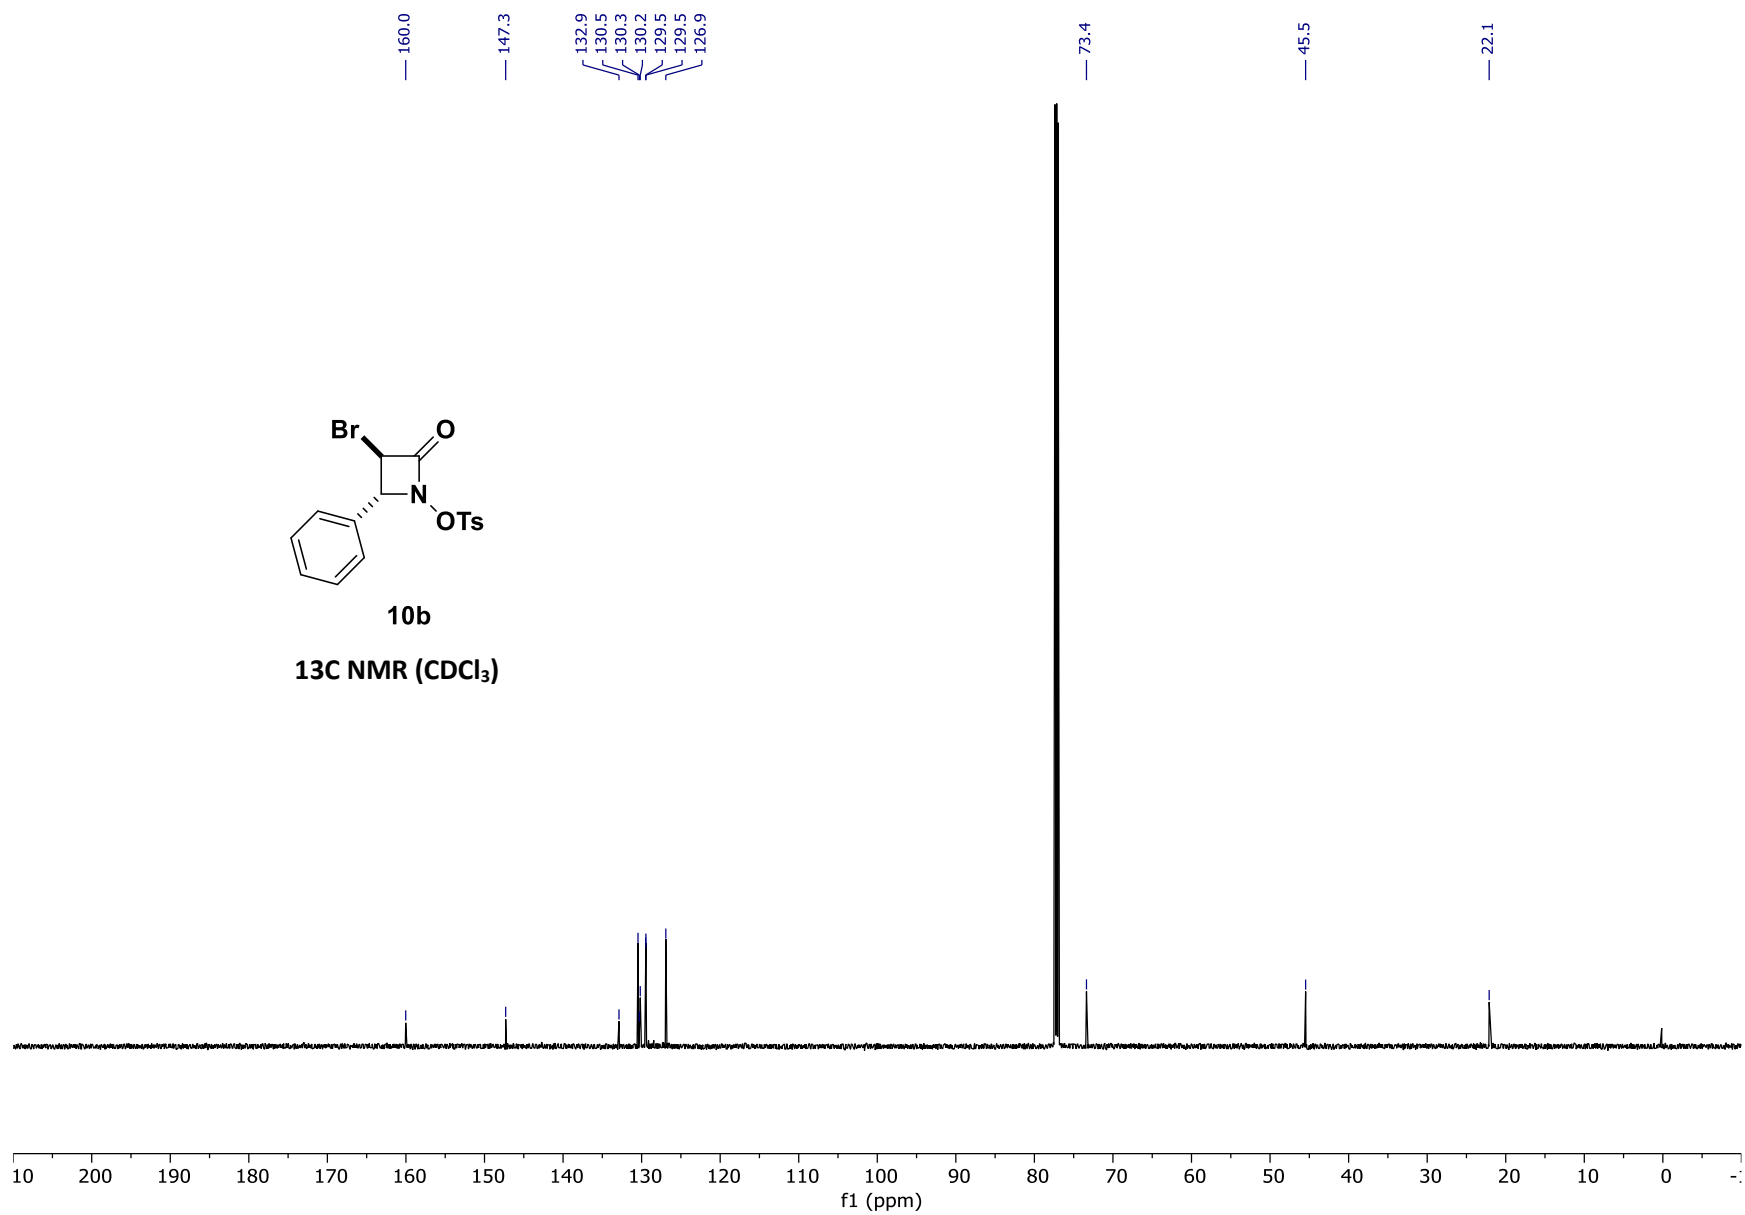

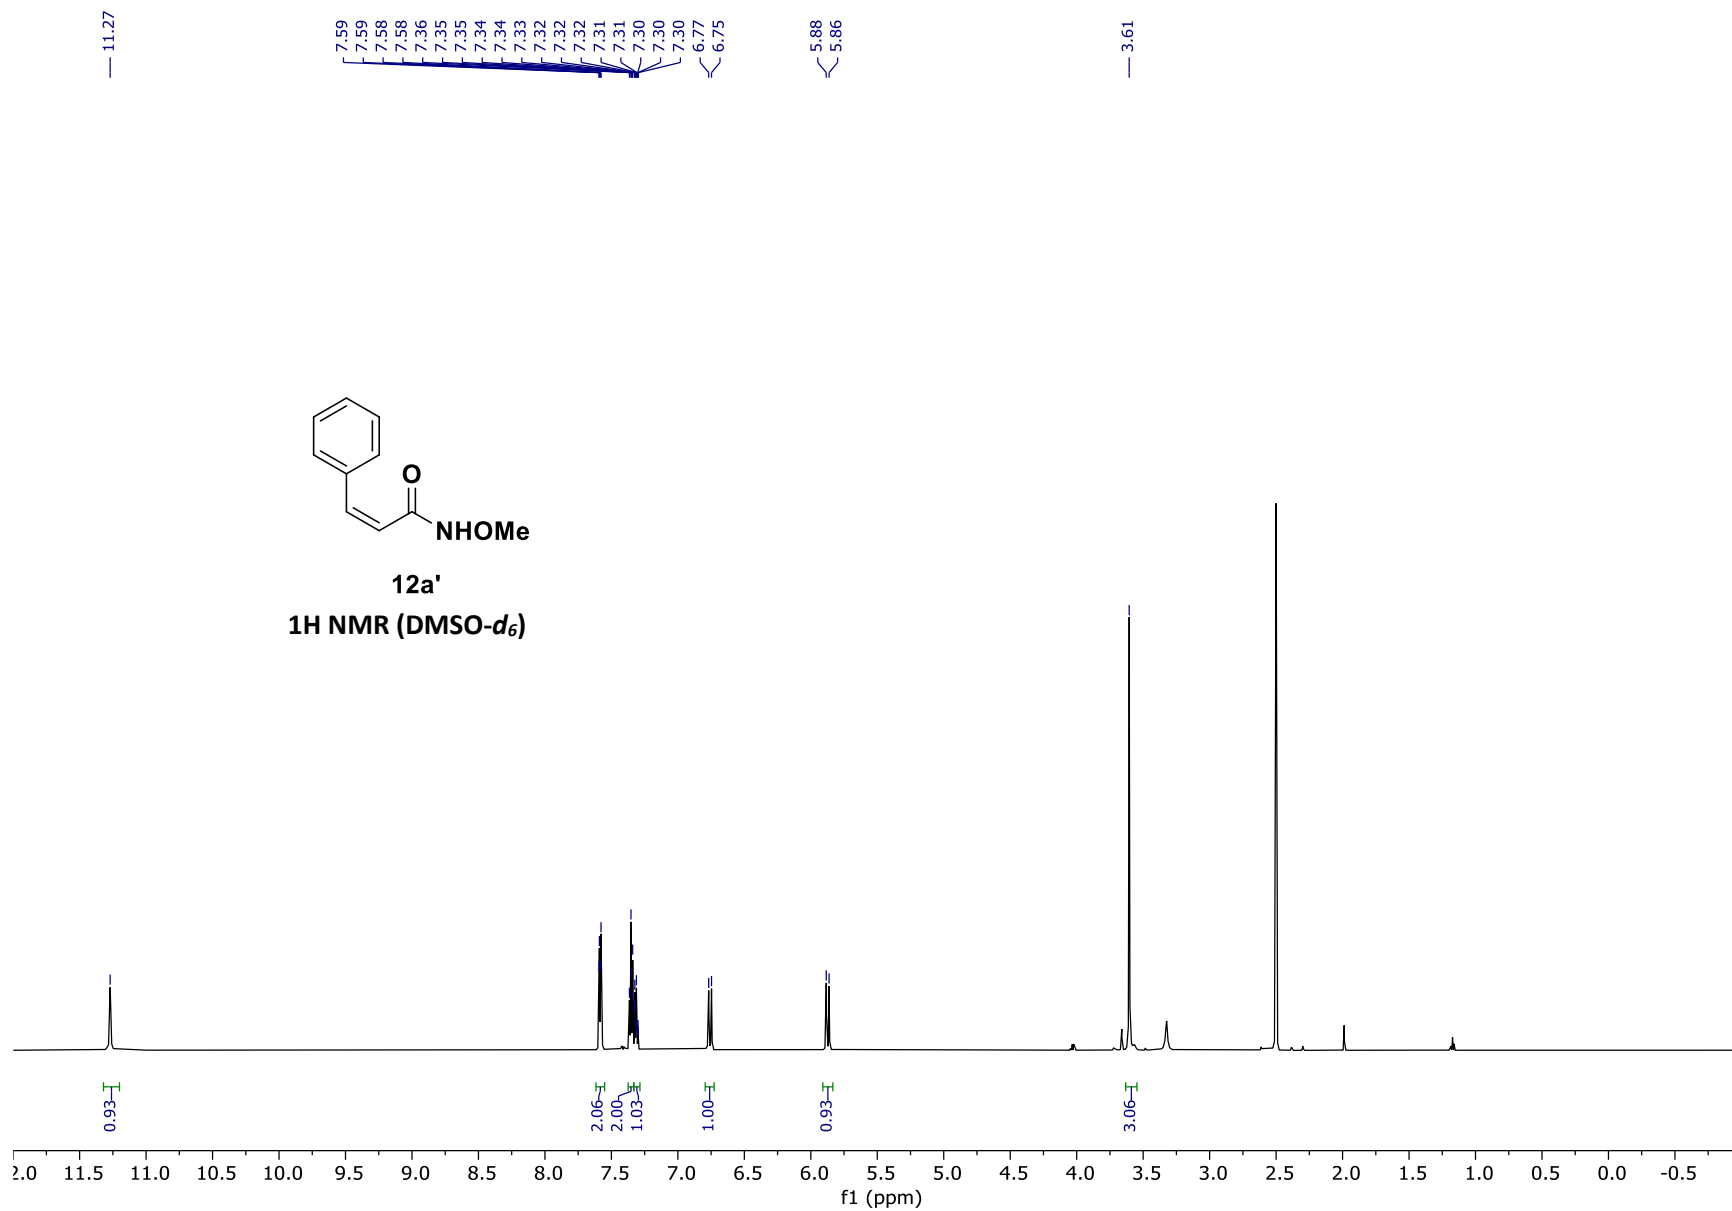

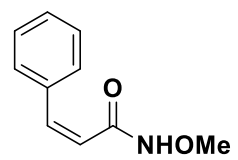

12a'

<sup>13</sup>C NMR (DMSO-*d*<sub>6</sub>)

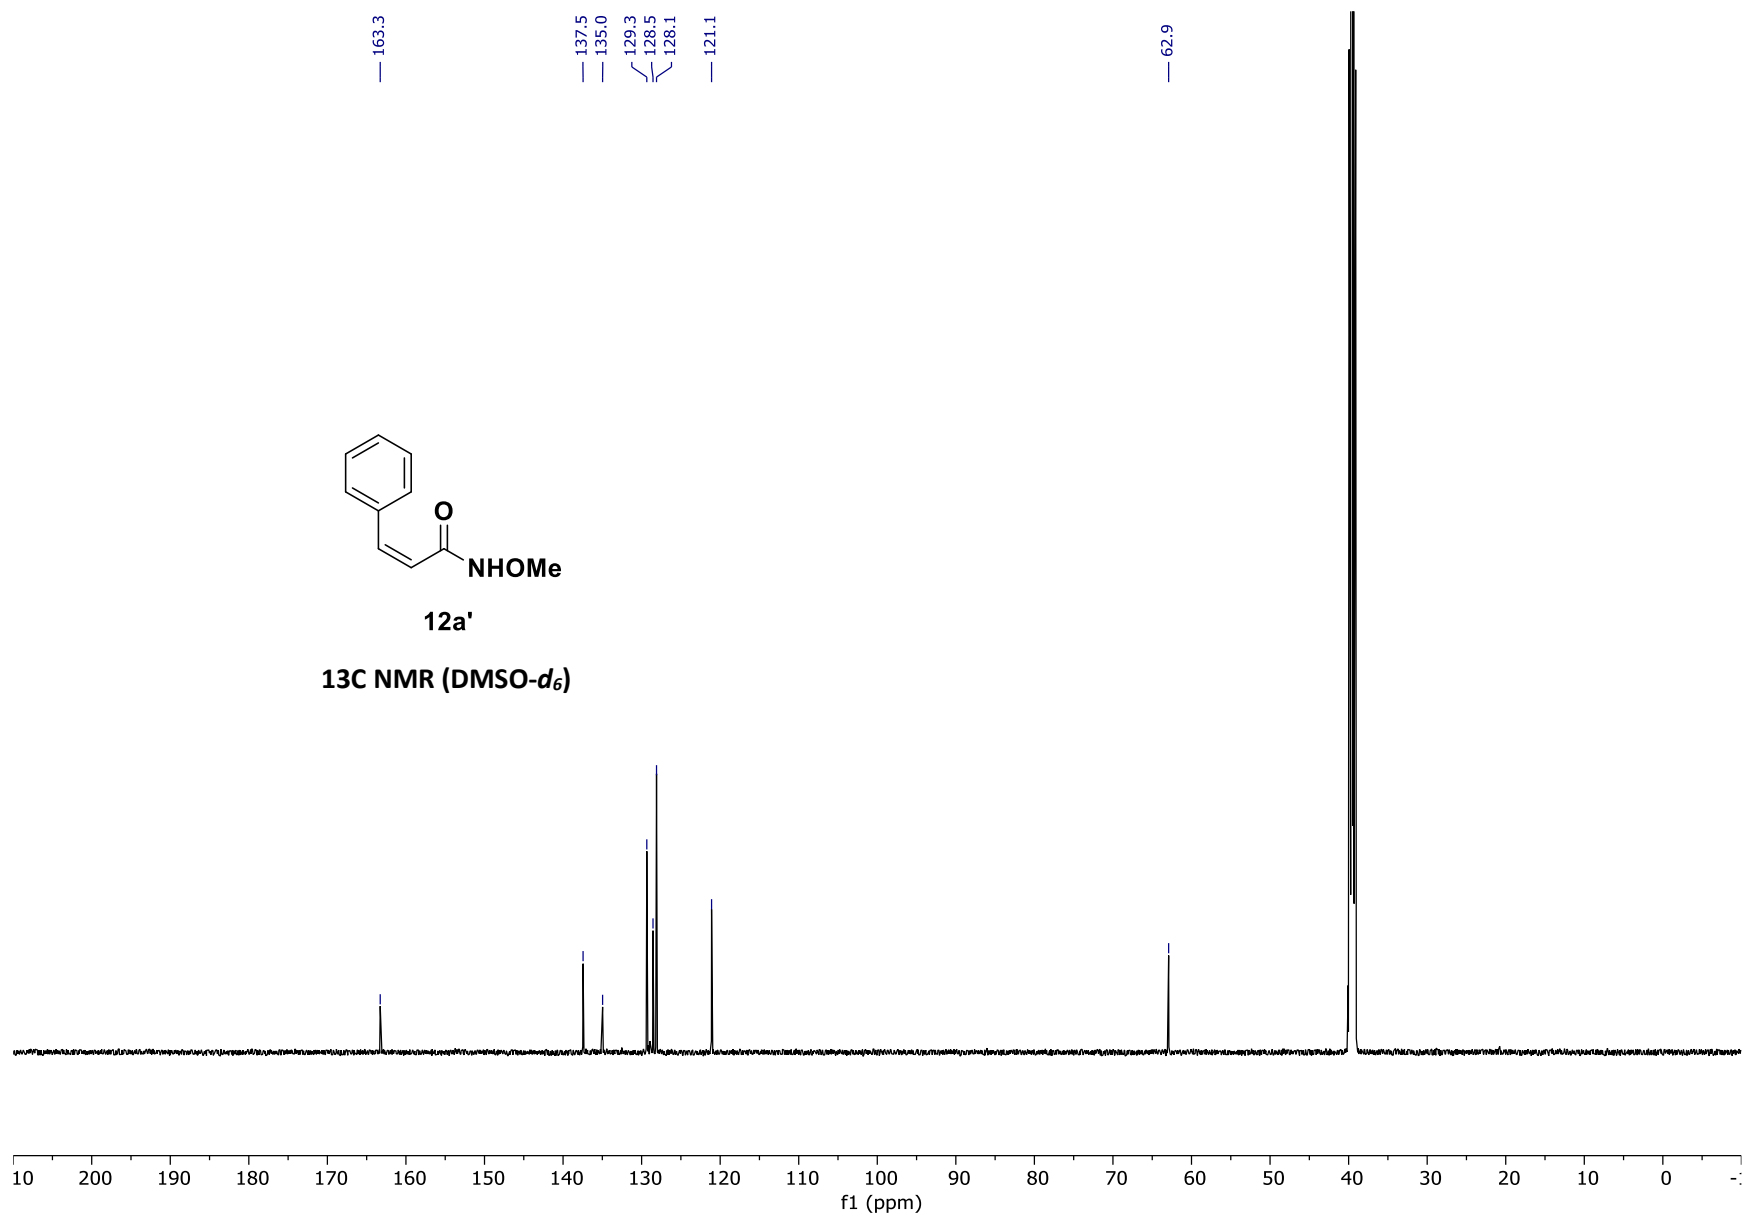

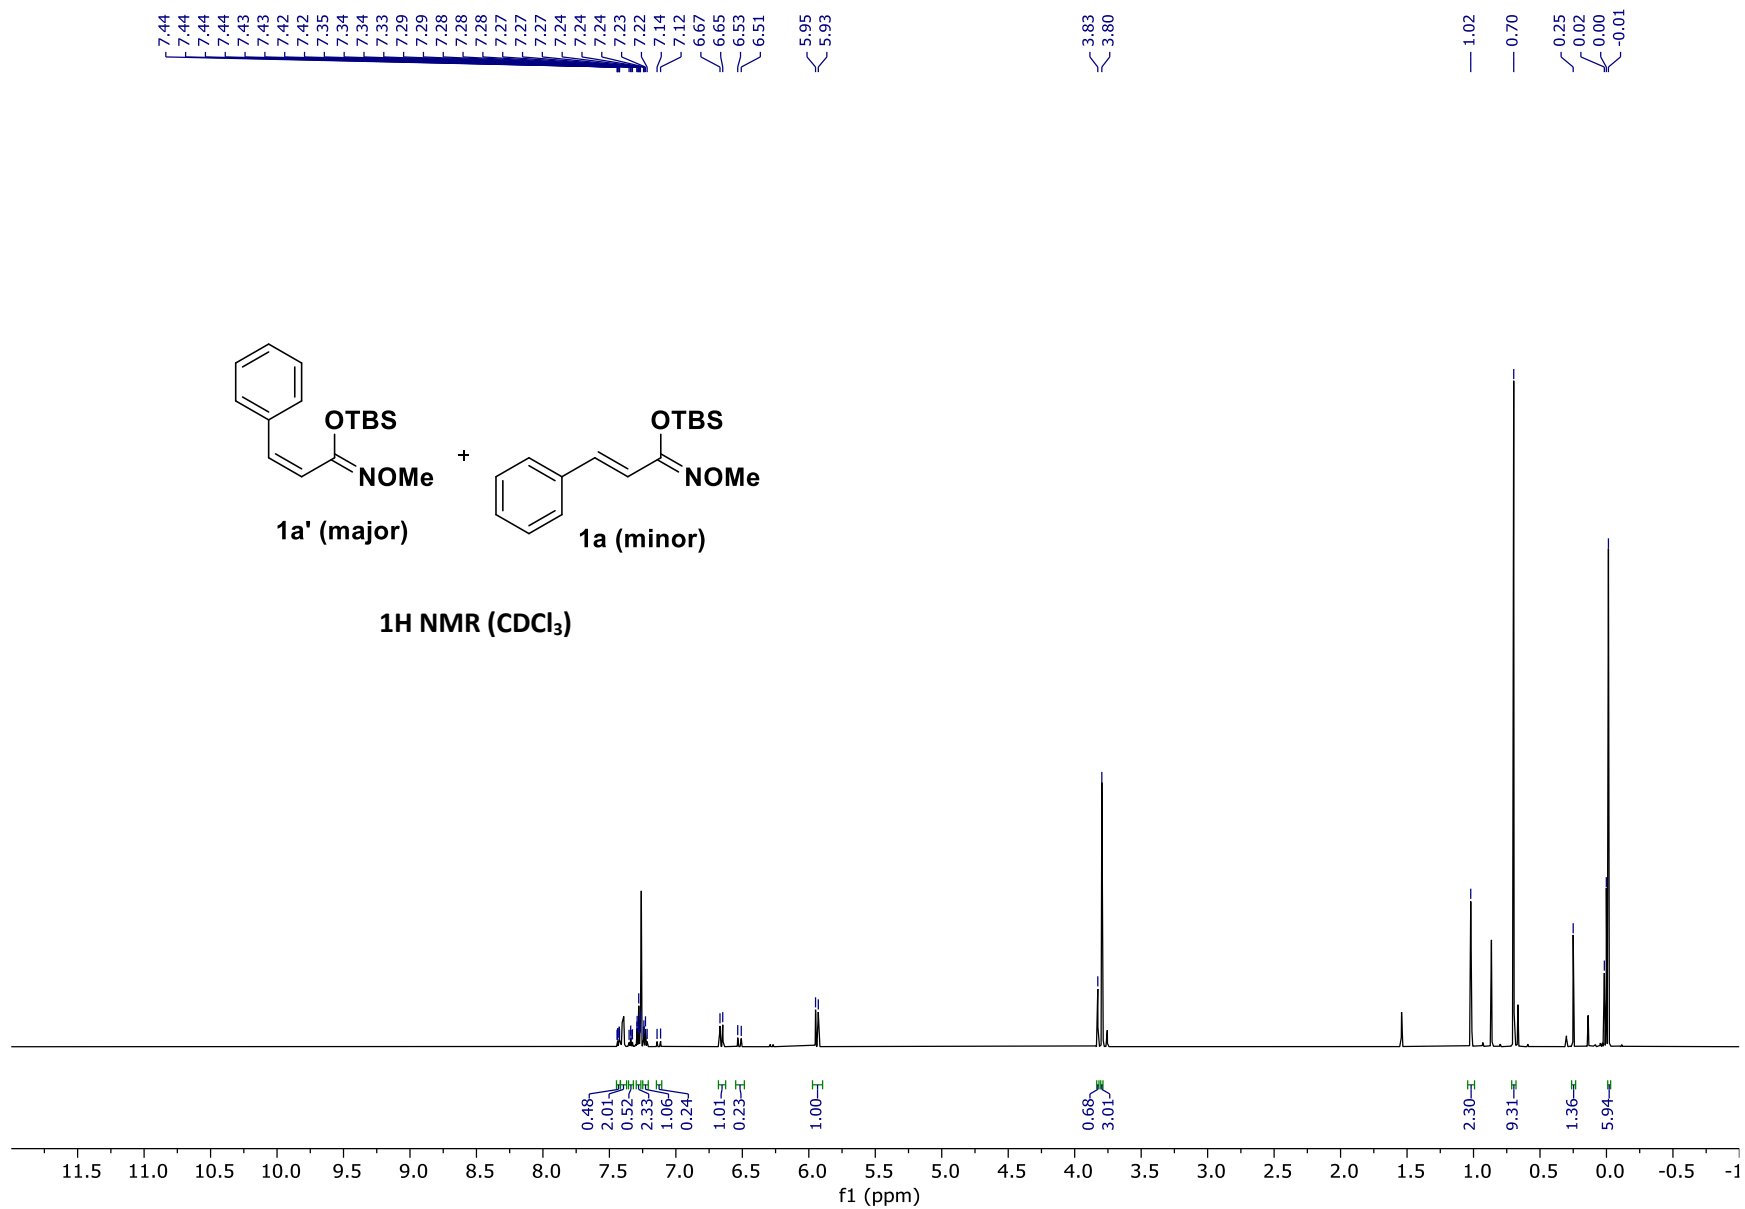

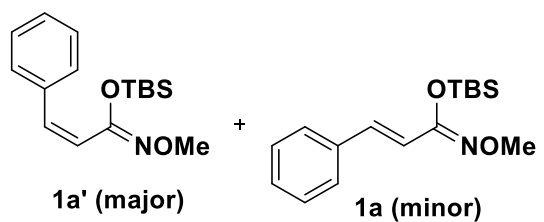

**<sup>13</sup>C NMR (CDCl<sub>3</sub>)**

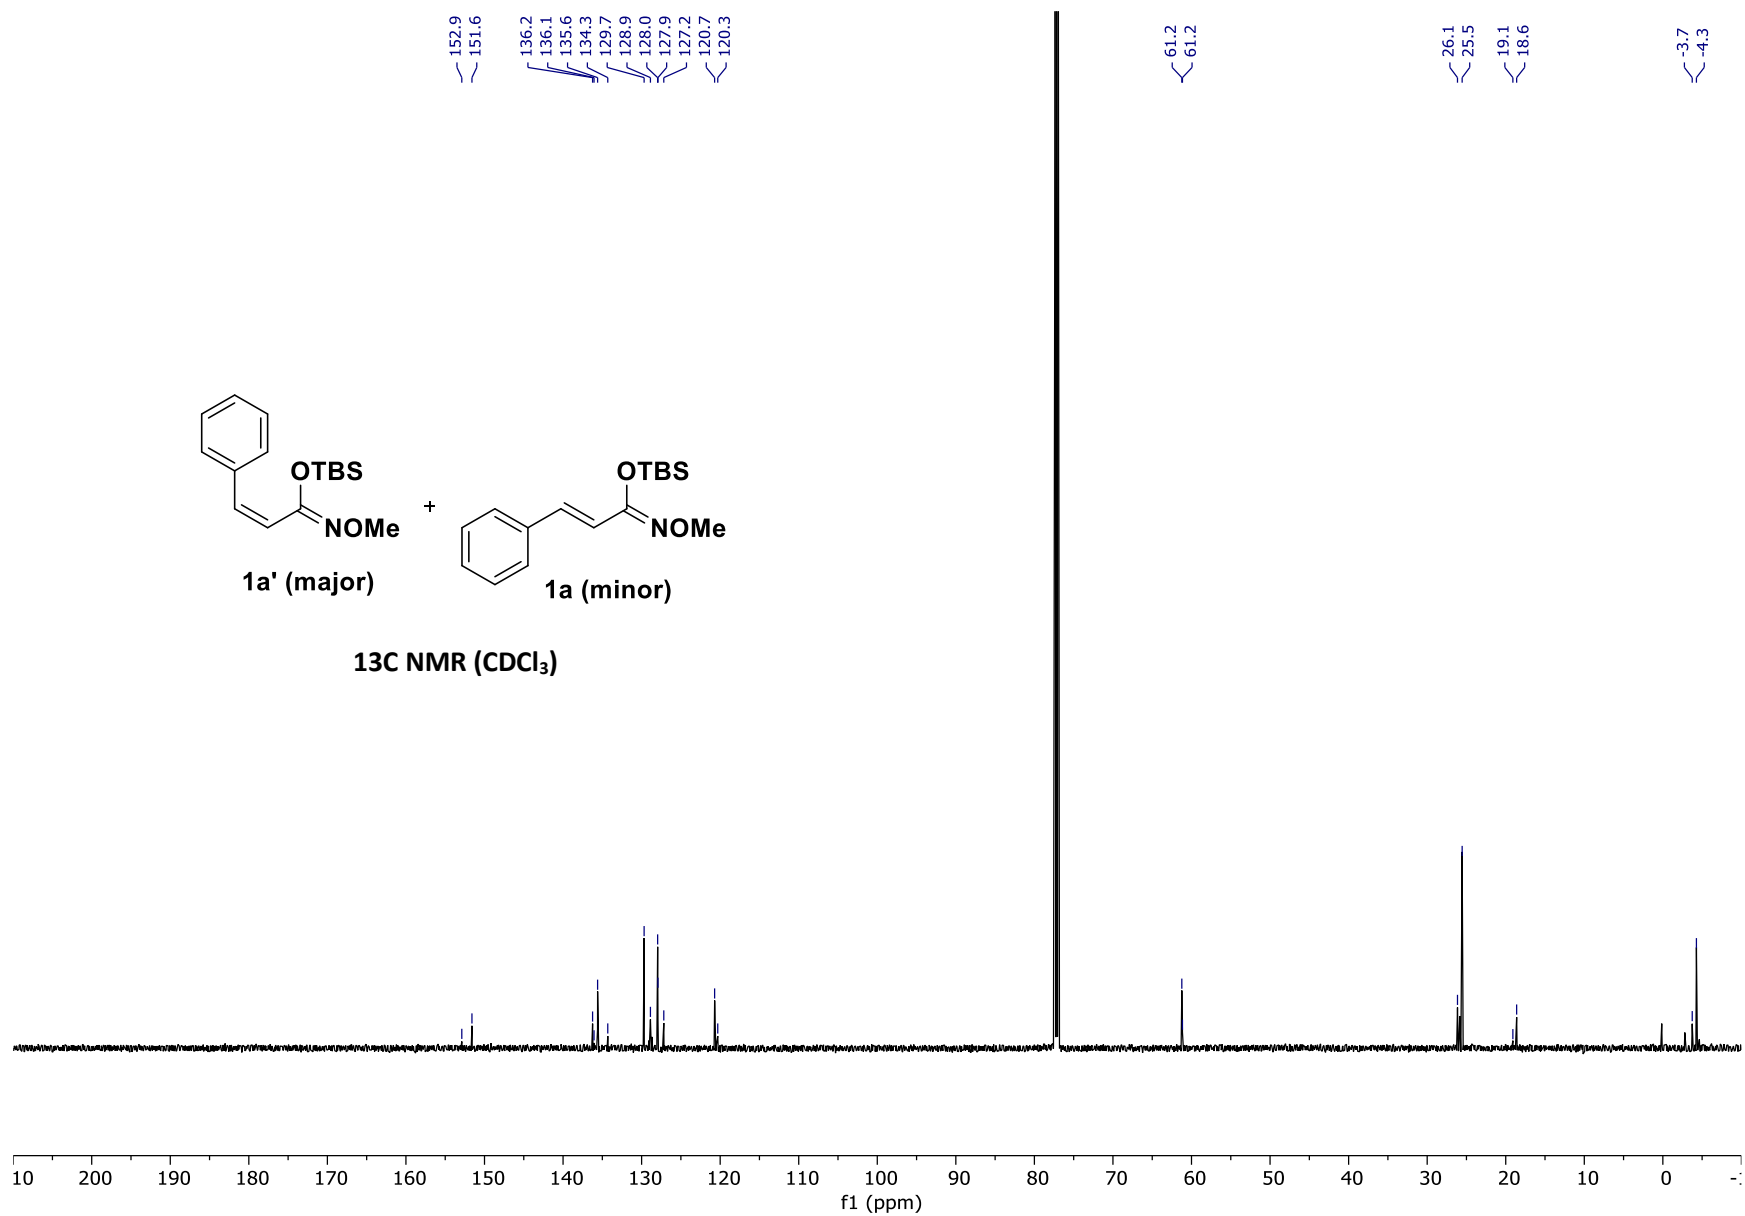



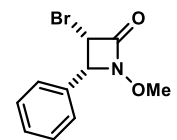

2a'

1H NMR (CDCl<sub>3</sub>)

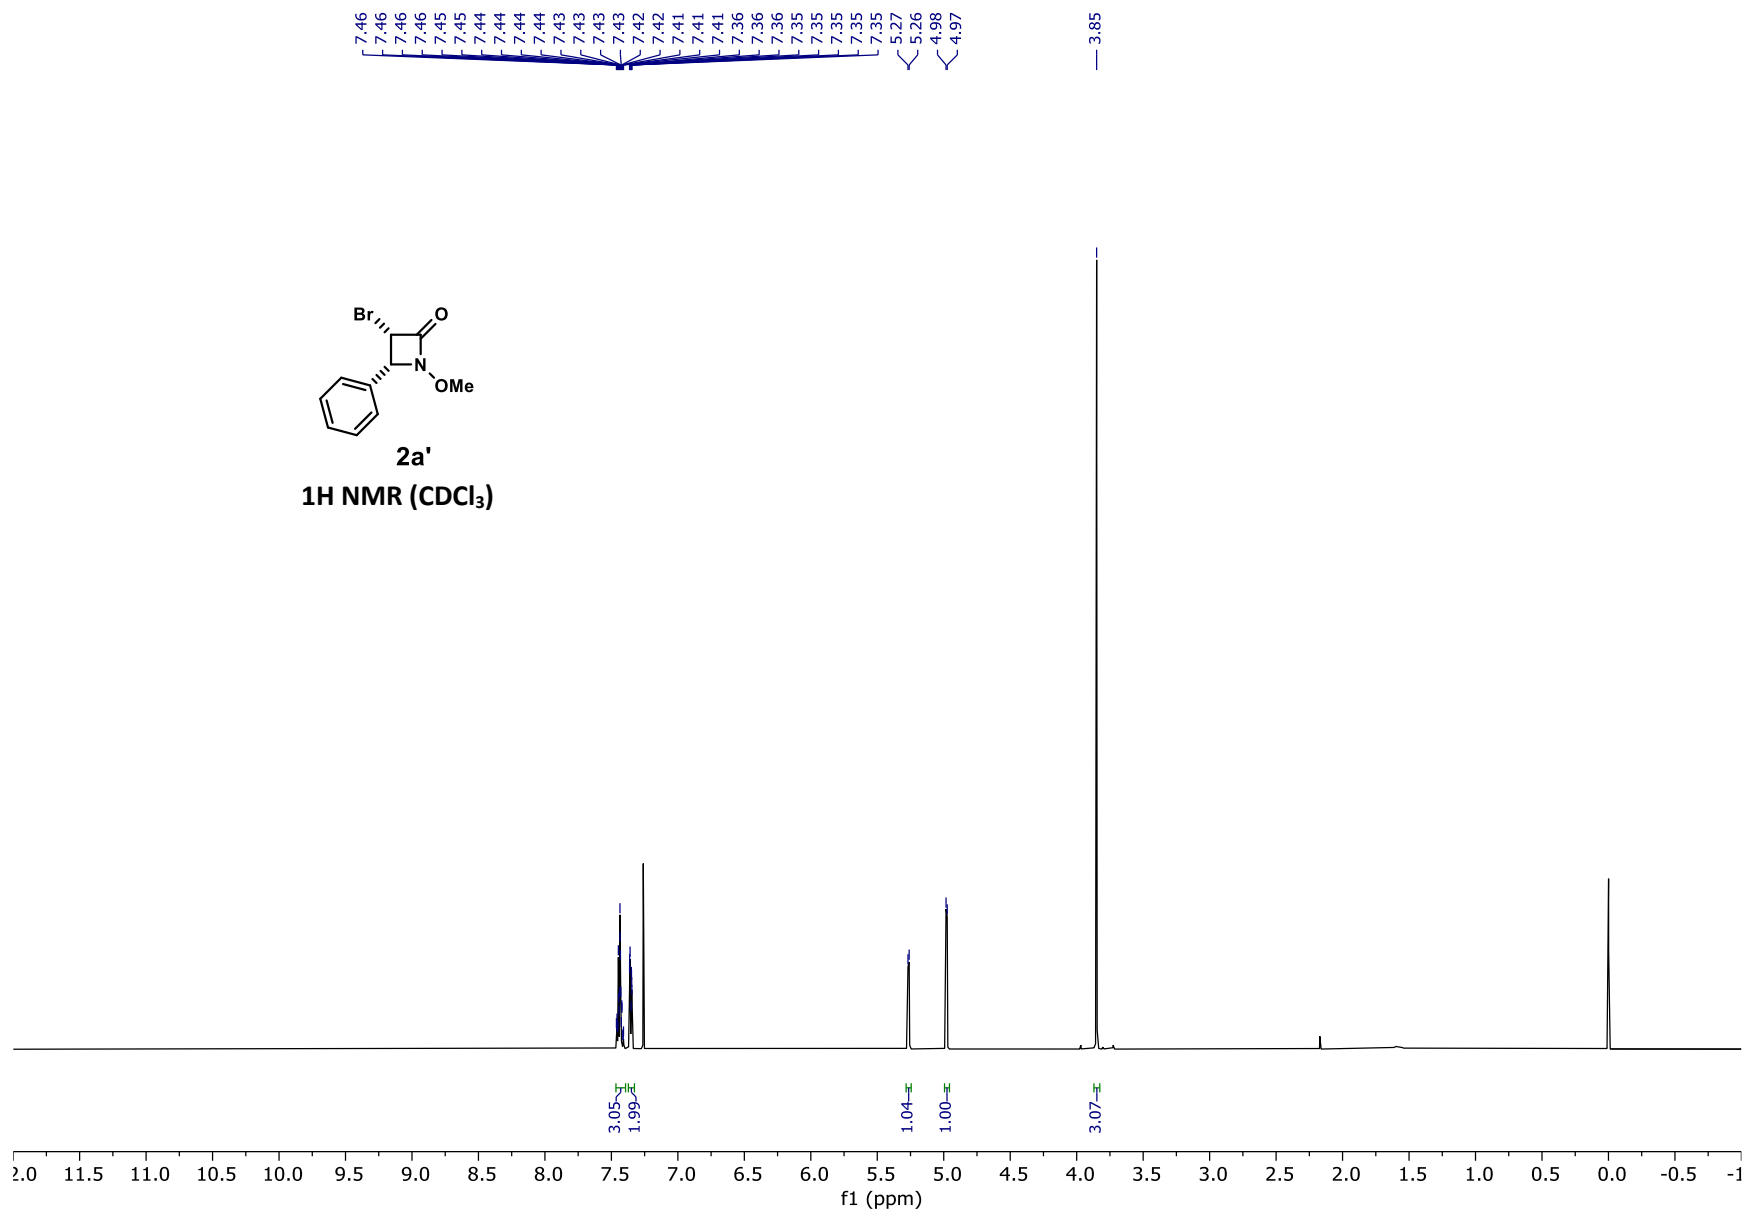

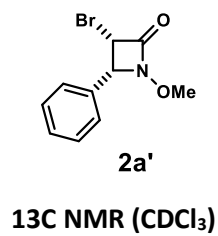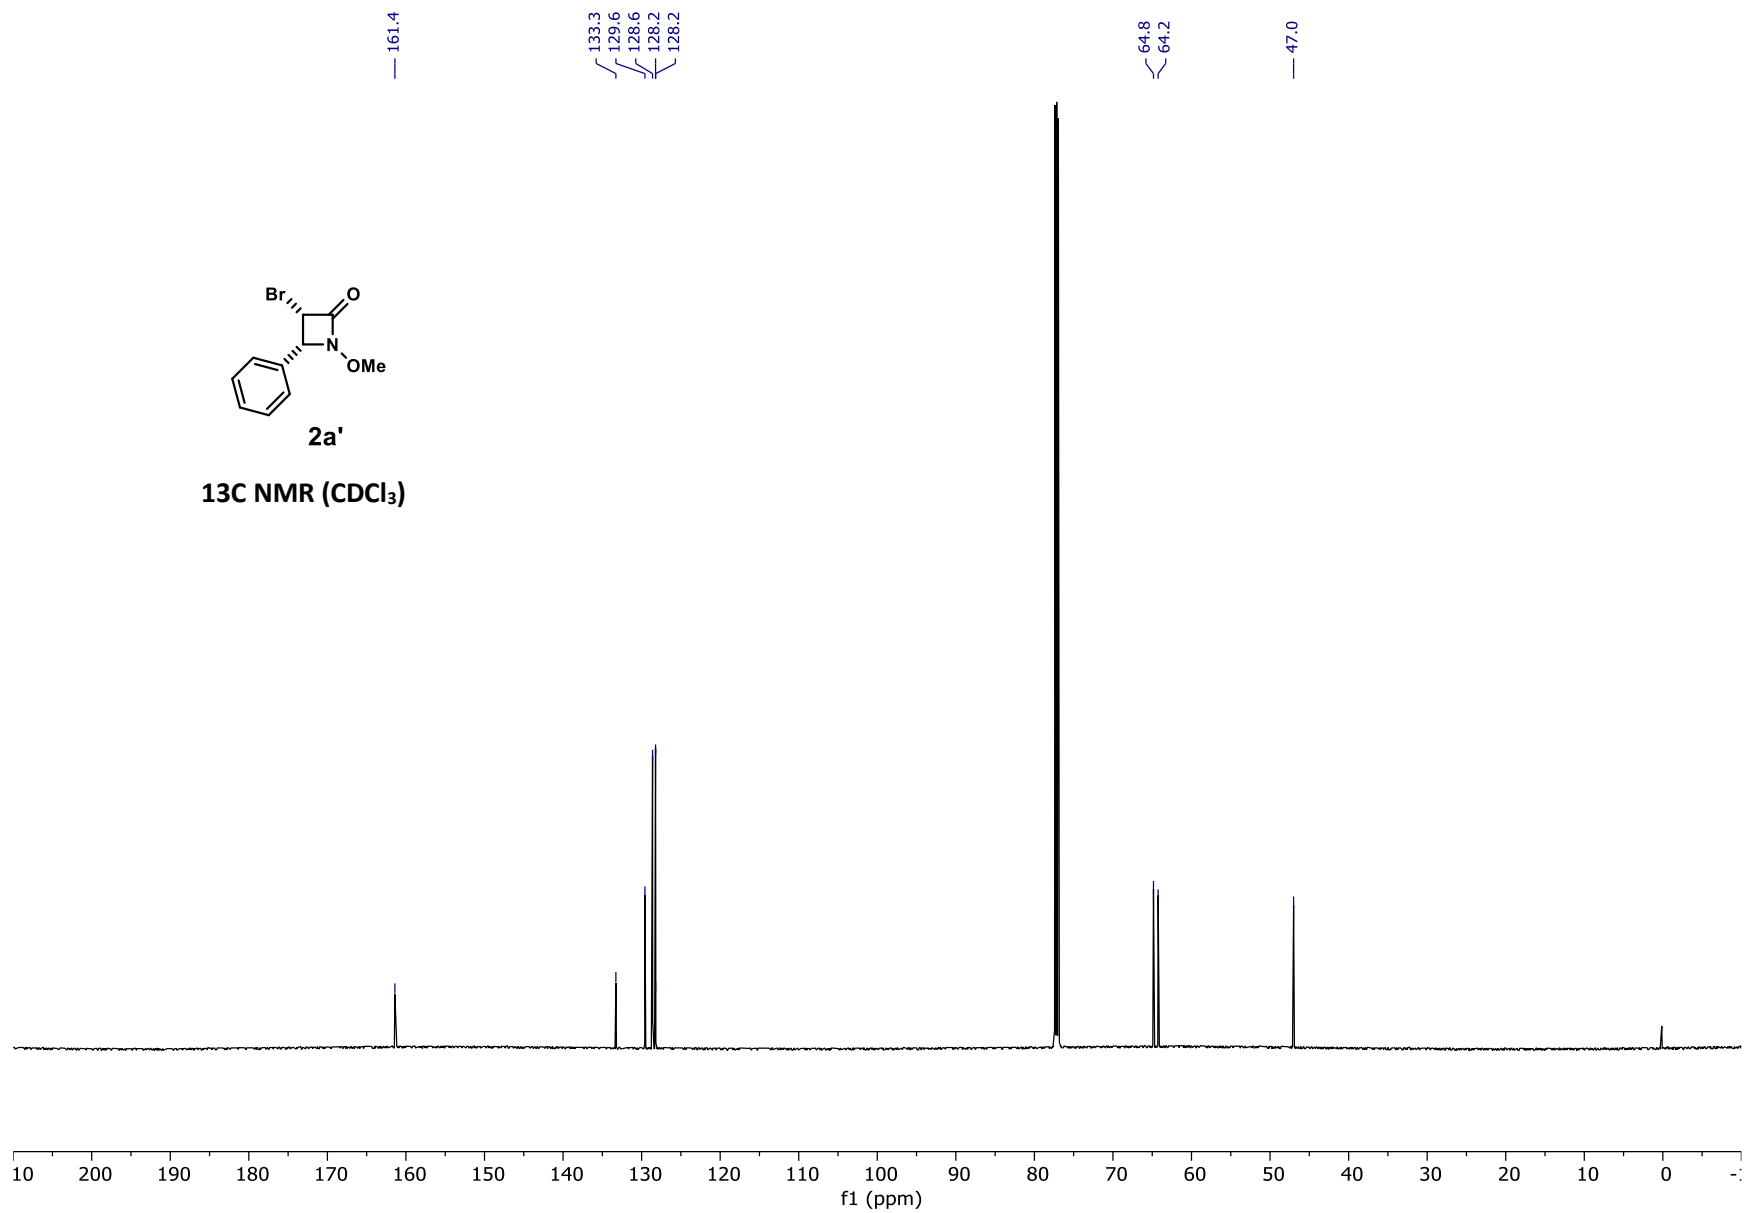

Supplement: d4sc01513d1.pdf [file d4sc01513d1.pdf]
